# Supplementary material for: Pd((R)-DTBM-SEGphos)Cl2-catalyzed kinetic resolution of tertiary propargylic alcohols
Source: Royal Society of Chemistry journal article supplement (doi:10.1039/d4qo00082j), 2024-01-01

## **Pd(*R*)-DTBM-SEGphos)Cl<sub>2</sub>-catalyzed kinetic resolution of tertiary propargylic alcohols**

Jie Wang,<sup>ac</sup> Wei-Feng Zheng,<sup>ac</sup> Yuling Li,<sup>b</sup> Yin-Long Guo,<sup>\*b</sup> Hui Qian,<sup>\*a</sup> Shengming Ma<sup>a,b</sup>

<sup>a</sup> Research Center for Molecular Recognition and Synthesis, Department of Chemistry, Fudan University, 220 Handan Lu, Shanghai 200433, P. R. China. E-mail: qian\_hui@fudan.edu.cn

<sup>b</sup> State Key Laboratory of Organometallic Chemistry, Shanghai Institute of Organic Chemistry, Chinese Academy of Sciences, 345 Lingling Lu, Shanghai 200032, P. R. China. E-mail: ylguo@sioc.ac.cn; masm@sioc.ac.cn

<sup>c</sup> These authors are equal contribution

|                                                                         |          |
|-------------------------------------------------------------------------|----------|
| General information                                                     | S2       |
| Experimental details and analytical data                                | S3-S53   |
| Monitoring Experiment                                                   | S54-S55  |
| SAESI-MS studies                                                        | S56      |
| References                                                              | S57      |
| <sup>1</sup> H and <sup>13</sup> C NMR and HPLC spectra of the products | S58-S313 |

**General Information.** NMR spectra were taken with Bruker Avance III spectrometer (400 MHz for  $^1\text{H}$  NMR, 100 MHz for  $^{13}\text{C}$  NMR) in  $\text{CDCl}_3$ . All  $^1\text{H}$  NMR experiments were measured with tetramethylsilane (0 ppm) in  $\text{CDCl}_3$  as the internal reference;  $^{13}\text{C}$  NMR experiments were measured in relative to the signal of  $\text{CDCl}_3$  (77.0 ppm). All reactions were carried out in Schlenk tubes. (*R*)- or (*S*)-DTBM-SEGphos was purchased from Strem Chemicals Inc.;  $(\text{PhO})_2\text{POOH}$  was purchased from Energy Chemical, acidified with 1 N HCl under stirring, and extracted with dichloromethane, then the solvent was removed under vacuum. Petroleum ether (b.p. 60~90°C) was purchased from Shanghai Titan Scientific Co., Ltd. Toluene was used as received without further purification. The reaction should be conducted in a hood working efficiently with a CO detector due to the toxicity of CO gas. All the temperatures are referred to the oil baths used. Recoveries of substrates were determined by  $^1\text{H}$  NMR analysis using dibromomethane as the internal standard. The tertiary propargylic alcohols<sup>1</sup> and racemic 2,3-allenoic acids<sup>2</sup> were prepared according to the literature methods. The optically active tertiary propargylic alcohols (*S*)-**1a**-(*S*)-**1f**, (*S*)-**1h**, (*S*)-**1j**-(*S*)-**1l**, (*S*)-**1o**-(*S*)-**1t** (*S*)-**1j**-(*S*)-**1l**<sup>3</sup> and the chiral 2,3-allenoic acids (*S*)-**2a**-(*S*)-**2v**<sup>4</sup> are known compounds.

## Experimental details and analytical data

### Synthesis of palladium complex

#### (1) Preparation of Pd((*R*)-DTBM-SEGphos)Cl<sub>2</sub> (zwf-6-135)<sup>5</sup>

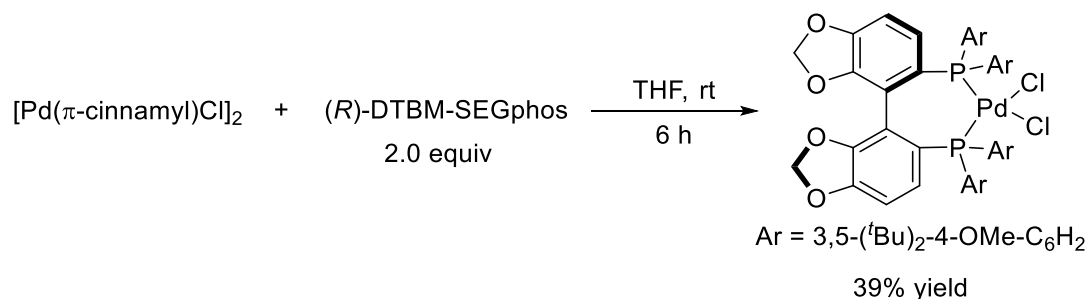

**Typical Procedure I:** To a dry flask were added [Pd( $\pi$ -cinnamyl)Cl]<sub>2</sub> (518.3 mg, 1 mmol) and (*R*)-DTBM-SEGphos (2.4077g, 2 mmol). Then THF (50 mL) were added under nitrogen atmosphere. After being stirred at rt for 6 h, removal of THF via evaporation and recrystallization from CH<sub>2</sub>Cl<sub>2</sub>/*n*-hexane afforded Pd((*R*)-DTBM-SEGphos)Cl<sub>2</sub> (1.0473 g, 39%).  $[\alpha]_{\text{D}}^{25} = +263.1$  ( $c = 1.14$ , CHCl<sub>3</sub>); solid; m.p. > 220 °C; <sup>1</sup>H NMR (rt, 400 MHz, CDCl<sub>3</sub>):  $\delta = 9.31$ -6.52 (m, 8 H, Ar-H), 6.43-6.29 (m, 4 H, Ar-H), 5.87 (s, 2 H, CH<sub>2</sub>), 5.66 (s, 2 H, CH<sub>2</sub>), 3.69 (s, 6 H, 2 x CH<sub>3</sub>), 3.62 (s, 6 H, 2 x CH<sub>3</sub>), 1.43-1.29 (m, 72 H, 24 x CH<sub>3</sub>); <sup>13</sup>C NMR (100 MHz, CDCl<sub>3</sub>):  $\delta = 162.6$  (d,  $J = 2.4$  Hz), 161.5 (d,  $J = 2.4$  Hz), 149.7 (d,  $J = 2.4$  Hz), 146.2 (d,  $J = 12.6$  Hz), 143.8 (d,  $J = 14.2$  Hz), 142.6 (d,  $J = 11.8$  Hz), 134.3 (d,  $J = 12.6$  Hz), 129.4 (d,  $J = 8.7$  Hz), 124.1 (d,  $J = 5.5$  Hz), 124.0 (d,  $J = 64.0$  Hz), 123.6 (d,  $J = 5.6$  Hz), 119.2 (d,  $J = 56.1$  Hz), 117.3 (d,  $J = 2.4$  Hz), 117.2 (d,  $J = 3.2$  Hz), 108.0 (d,  $J = 11.8$  Hz), 100.8, 64.3 (d,  $J = 2.3$  Hz), 36.0, 35.9, 32.0, 31.8; <sup>31</sup>P NMR (162 MHz, CDCl<sub>3</sub>):  $\delta = 29.1$ ; IR (neat):  $\nu = 2959, 1440, 1393, 1264, 1227, 1207, 1182, 1140, 1115, 1046, 1007$  cm<sup>-1</sup>; MS (MALDI)  $m/z$  (%): 1319 (M(<sup>35</sup>Cl)-Cl)<sup>+</sup>; Anal. Calcd. for C<sub>70</sub>H<sub>100</sub>Cl<sub>2</sub>O<sub>8</sub>P<sub>2</sub>Pd: C 65.50, H 7.43; found: C 65.66, H 7.31. (Variable temperature <sup>1</sup>H-NMR spectra was given for explaining the hidden proton)

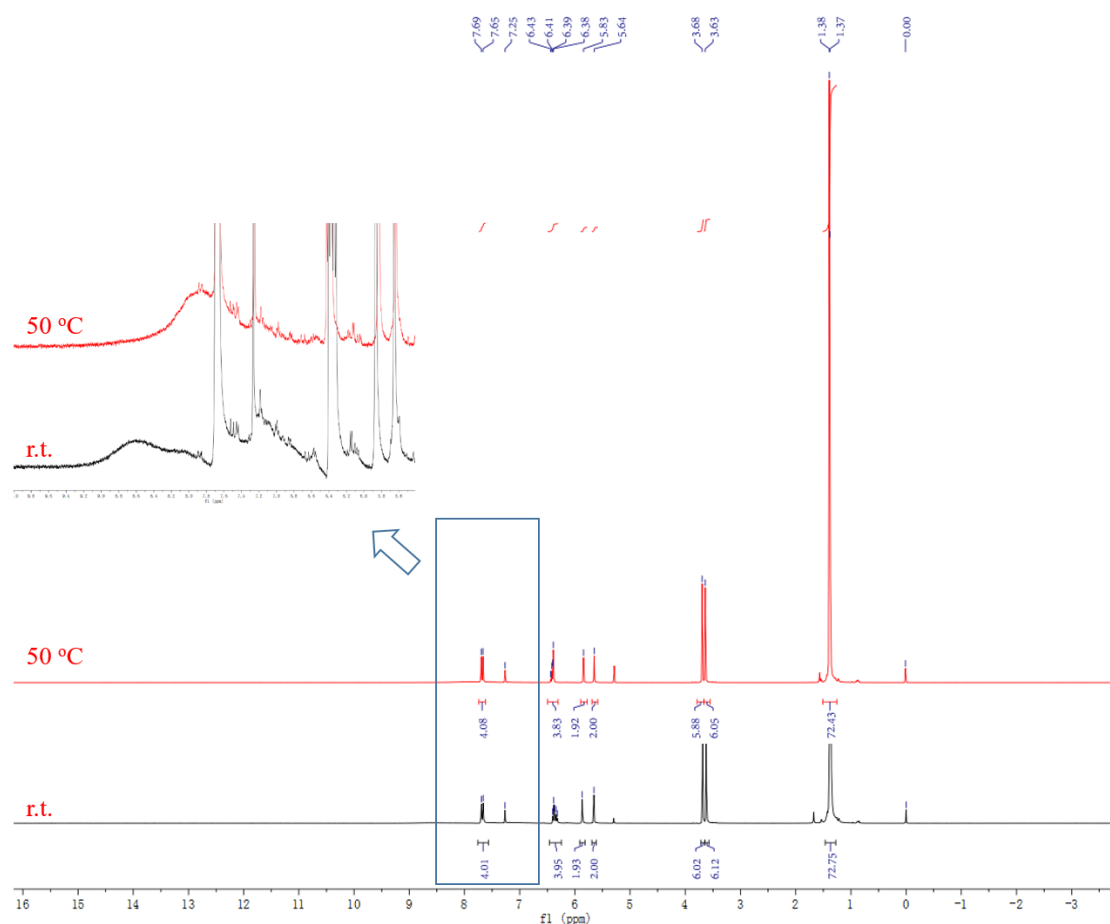

**Supplementary Figure 1.  $^1\text{H-NMR}$  (400 MHz) spectra of  $\text{Pd}((R)\text{-DTBM-SEGphos})\text{Cl}_2$  in  $\text{CDCl}_3$  at different temperature.**

**(2) Preparation of  $\text{Pd}((S)\text{-DTBM-SEGphos})\text{Cl}_2$  (zwf-7-124)**

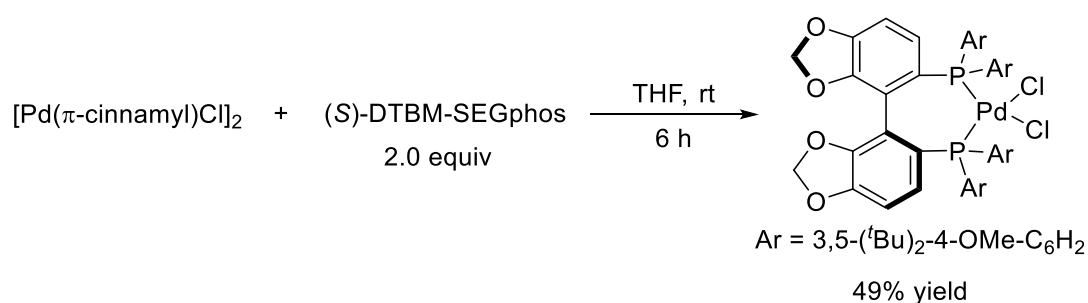

Following Typical Procedure I: the reaction of  $[\text{Pd}(\pi\text{-cinnamyl})\text{Cl}]_2$  (518.6 mg, 1 mmol),  $(S)\text{-DTBM-SEGphos}$  (2.4083g, 2 mmol) and THF (50 mL) afforded  $\text{Pd}((S)\text{-DTBM-SEGphos})\text{Cl}_2$  (1.3242 g, 49%).  $[\alpha]_{\text{D}}^{26} = -260.3$  ( $c = 1.24$ ,  $\text{CHCl}_3$ ); solid; m.p. > 220 °C;  $^1\text{H NMR}$  (rt, 400 MHz,  $\text{CDCl}_3$ ):  $\delta = 9.30\text{-}6.51$  (m, 8 H, Ar-H), 6.42-6.29 (m, 4 H, Ar-H), 5.87 (s, 2 H,  $\text{CH}_2$ ), 5.66 (s, 2 H,  $\text{CH}_2$ ), 3.69 (s, 6 H, 2 x  $\text{CH}_3$ ), 3.62 (s, 6 H, 2

x CH<sub>3</sub>), 1.42-1.30 (m, 72 H, 24 x CH<sub>3</sub>); <sup>13</sup>C NMR (100 MHz, CDCl<sub>3</sub>): δ = 162.6 (d, *J* = 2.4 Hz), 161.5 (d, *J* = 2.4 Hz), 149.7 (d, *J* = 2.4 Hz), 146.2 (d, *J* = 12.6 Hz), 143.8 (d, *J* = 12.7 Hz), 142.6 (d, *J* = 11.8 Hz), 134.3 (d, *J* = 11.8 Hz), 129.4 (d, *J* = 8.7 Hz), 124.1 (d, *J* = 5.5 Hz), 124.0 (d, *J* = 64.0 Hz), 123.6 (d, *J* = 4.8 Hz), 119.2 (d, *J* = 56.1 Hz), 117.3 (d, *J* = 2.4 Hz), 117.2 (d, *J* = 2.4 Hz), 108.0 (d, *J* = 11.8 Hz), 100.8, 64.3 (d, *J* = 2.3 Hz), 36.0, 35.9, 32.0, 31.8; <sup>31</sup>P NMR (162 MHz, CDCl<sub>3</sub>): δ = 29.0; IR (neat): ν = 2955, 2940, 1440, 1393, 1264, 1226, 1182, 1140, 1115, 1046, 1006 cm<sup>-1</sup>; MS (MALDI) *m/z* (%): 1319 (M(<sup>35</sup>Cl)-Cl)<sup>+</sup>; Anal. Calcd. for C<sub>70</sub>H<sub>100</sub>Cl<sub>2</sub>O<sub>8</sub>P<sub>2</sub>Pd: C 65.50, H 7.43; found: C 65.71, H 7.30.

## Synthesis of chiral tertiary propargylic alcohols

### (1) Preparation of (*S*)-2-phenyloct-3-yn-2-ol ((*S*)-1a) (wj-1-015-1)

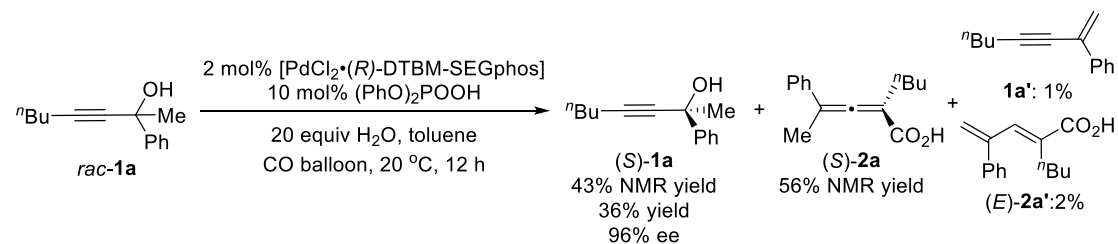

**Typical Procedure II:** To a Schlenk flask (25 mL) were added [PdCl<sub>2</sub>·(*R*)-DTBM-SEGphos] (13.4 mg, 0.01 mmol) and (PhO)<sub>2</sub>PO<sub>2</sub>H (12.7 mg, 0.05 mmol). After addition, the flask was degassed and refilled with Ar for three times to ensure the complete exclusion of air. Then *rac*-1a (100.3 mg, 0.5 mmol)/toluene (1.5 mL) and H<sub>2</sub>O (180 μL, d = 1.0 g/mL, 180.0 mg, 10 mmol)/toluene (1.0 mL) were added sequentially. After that, the Ar gas line was closed. The resulting mixture was then frozen with a liquid nitrogen bath, degassed to remove the argon inside completely, and refilled with CO by a balloon of CO (about 1 L) for three times. Then the liquid nitrogen bath was removed and the resulting mixture was allowed to stand until completely thawed, vigorously stirred at 20 °C with a balloon of CO for 12 h, warmed up to room temperature, diluted with 5 mL of ethyl acetate, filtered through a short column silica gel (3 cm) eluted with ethyl acetate (20 mL), and concentrated. The crude product was analyzed by <sup>1</sup>H NMR with CH<sub>2</sub>Br<sub>2</sub> (35 μL, 2.477 g/mL, 0.5 mmol) as the internal standard: 56% NMR yield of

(*S*)-**2a**, 1% of **1a'**, and 2% of (*E*)-**2a'** were formed with 43% of (*S*)-**1a** remained. The residue was purified by chromatography on silica gel to afford the product (*S*)-**1a** (36.4 mg, 36%) [eluent: petroleum ether / ethyl ether / dichloromethane = 30/1/1 (480mL), then petroleum ether / ethyl acetate = 10/1 (440 mL)]: 96% ee (HPLC conditions: AS-H column, hexane/*i*PrOH = 98/2, 1.0 mL/min,  $\lambda$  = 214 nm,  $t_R$  (minor) = 7.2 min,  $t_R$  (major) = 11.0 min); oil;  $^1\text{H NMR}$  (400 MHz,  $\text{CDCl}_3$ ):  $\delta$  = 7.65 (d,  $J$  = 7.6 Hz, 2 H, Ar-H), 7.35 (t,  $J$  = 7.6 Hz, 2 H, Ar-H), 7.30-7.23 (m, 1 H, Ar-H), 2.38 (d,  $J$  = 8.8 Hz, 1 H, OH), 2.27 (t,  $J$  = 7.0 Hz, 2 H,  $\text{CH}_2$ ), 1.74 (s, 3 H,  $\text{CH}_3$ ), 1.58-1.48 (m, 2 H,  $\text{CH}_2$ ), 1.48-1.38 (m, 2 H,  $\text{CH}_2$ ), 0.92 (t,  $J$  = 7.2 Hz, 3 H,  $\text{CH}_3$ );  $^{13}\text{C NMR}$  (100 MHz,  $\text{CDCl}_3$ ):  $\delta$  = 146.2, 128.1, 127.4, 124.9, 85.6, 83.7, 70.0, 33.5, 30.7, 21.9, 18.4, 13.5.

## (2) Preparation of (*S*)-2-(2-methylphenyl)oct-3-yn-2-ol ((*S*)-**1b**) (wj-1-017-1)

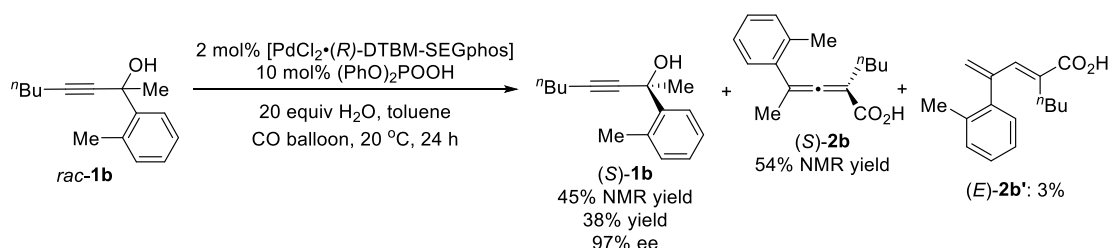

Following Typical Procedure II, the reaction of  $[\text{PdCl}_2 \cdot (R)\text{-DTBM-SEGphos}]$  (13.6 mg, 0.01 mmol),  $(\text{PhO})_2\text{PO}_2\text{H}$  (12.6 mg, 0.05 mmol), *rac*-**1b** (108.7 mg, 0.5 mmol), and  $\text{H}_2\text{O}$  (180  $\mu\text{L}$ ,  $d$  = 1.0 g/mL, 180.0 mg, 10.0 mmol) in toluene (2.5 mL) afforded the product (*S*)-**1b** (41.2 mg, 38%) (54% NMR yield of (*S*)-**2b**, and 3% of (*E*)-**2b'** were formed with 45% of (*S*)-**1b** remained based on  $^1\text{H NMR}$  analysis of the crude product) [eluent: petroleum ether / diethyl ether / DCM = 30/1/1 (448 mL), then petroleum ether/ethyl acetate = 10/1 (440 mL)]: 97% ee (HPLC conditions: AS-H column, hexane/*i*PrOH = 98/2, 1.0 mL/min,  $\lambda$  = 214 nm,  $t_R$  (minor) = 6.5 min,  $t_R$  (major) = 8.5 min); oil;  $^1\text{H NMR}$  (400 MHz,  $\text{CDCl}_3$ ):  $\delta$  = 7.73-7.65 (m, 1 H, Ar-H), 7.21-7.10 (m, 3 H, Ar-H), 2.62 (s, 3 H,  $\text{CH}_3$ ), 2.39-2.30 (m, 1 H, OH), 2.23 (t,  $J$  = 7.0 Hz, 2 H,  $\text{CH}_2$ ), 1.80 (s, 3 H,  $\text{CH}_3$ ), 1.56-1.45 (m, 2 H,  $\text{CH}_2$ ), 1.45-1.34 (m, 2 H,  $\text{CH}_2$ ), 0.90 (t,  $J$  = 7.2 Hz, 3 H,  $\text{CH}_3$ );  $^{13}\text{C NMR}$  (100 MHz,  $\text{CDCl}_3$ ):  $\delta$  = 142.8, 135.6, 132.2, 127.4, 125.6, 124.9, 85.2, 84.1, 69.7, 31.1, 30.6, 22.0, 21.2, 18.4, 13.5.

### (3) Preparation of (*S*)-2-(3-methylphenyl)oct-3-yn-2-ol ((*S*)-1c) (wj-1-020-1)

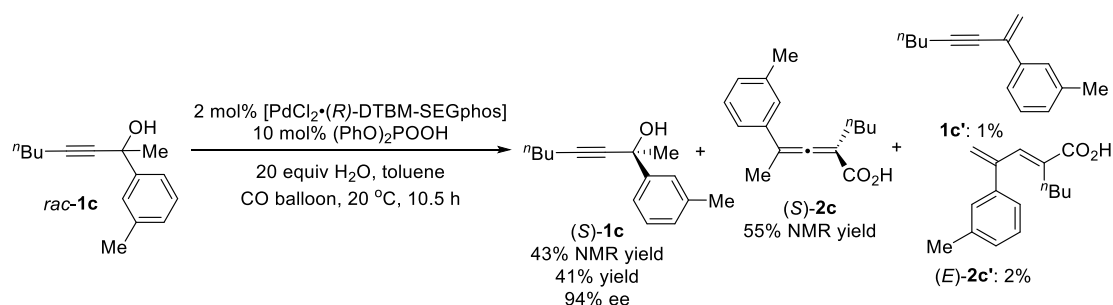

Following Typical Procedure II, the reaction of [PdCl<sub>2</sub>•(*R*)-DTBM-SEGphos] (13.8 mg, 0.01 mmol), (PhO)<sub>2</sub>PO<sub>2</sub>H (12.5 mg, 0.05 mmol), *rac*-1c (109.6mg, 0.5 mmol), and H<sub>2</sub>O (180 μL, d = 1.0 g/mL, 180.0 mg, 10.0 mmol) in toluene (2.5 mL) afforded the product (*S*)-1c (44.4 mg, 41%) (55% NMR yield of (*S*)-2c, 1% of 1c', and 2% of (*E*)-2c' were formed with 43% of (*S*)-1c remained based on <sup>1</sup>H NMR analysis of the crude product) [eluent: petroleum ether / diethyl ether / DCM = 30/1/1 (480 mL), then petroleum ether/ethyl acetate = 10/1 (440 mL)]: 94% ee (HPLC conditions: AS-H column, hexane/<sup>i</sup>PrOH = 98/2, 1.0 mL/min, λ = 214 nm, t<sub>R</sub> (minor) = 6.6 min, t<sub>R</sub> (major) = 8.8 min); oil; <sup>1</sup>H NMR (400 MHz, CDCl<sub>3</sub>): δ = 7.51-7.39 (m, 2 H, Ar-H), 7.28-7.19 (m, 1 H, Ar-H), 7.12-7.02 (m, 1 H, Ar-H), 2.46-2.33 (m, 4 H, CH<sub>3</sub> and OH), 2.27 (t, *J* = 7.0 Hz, 2 H, CH<sub>2</sub>) 1.73 (s, 3 H, CH<sub>3</sub>), 1.58-1.38 (m, 4 H, 2 x CH<sub>2</sub>), 0.93 (t, *J* = 7.2 Hz, 3 H, CH<sub>3</sub>); <sup>13</sup>C NMR (100 MHz, CDCl<sub>3</sub>): δ = 146.2, 137.7, 128.2, 128.1, 125.6, 122.0, 85.5, 83.9, 70.0, 33.5, 30.7, 21.9, 21.5, 18.4, 13.5.

### (4) Preparation of (*S*)-2-(3-methoxyphenyl)oct-3-yn-2-ol ((*S*)-1d) (wj-1-024-1)

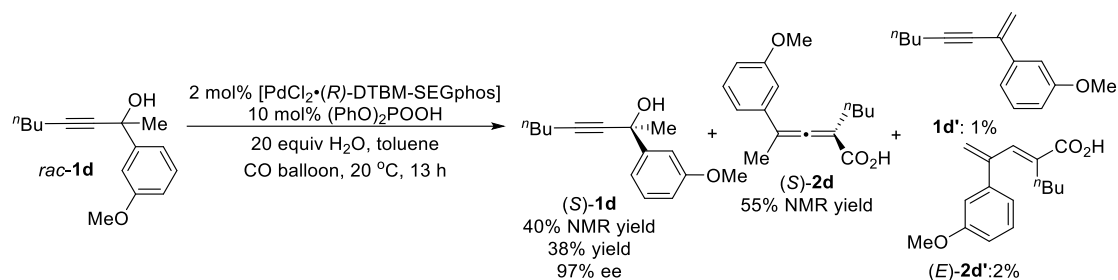

Following Typical Procedure II, the reaction of [PdCl<sub>2</sub>•(*R*)-DTBM-SEGphos] (13.6 mg, 0.01 mmol), (PhO)<sub>2</sub>PO<sub>2</sub>H (12.4 mg, 0.05 mmol), *rac*-1d (115.7 mg, 0.5 mmol), and H<sub>2</sub>O (180 μL, d = 1.0 g/mL, 180.0 mg, 10 mmol) in toluene (2.5 mL) afforded the product (*S*)-1d (44.5 mg, 38%) (55% NMR yield of (*S*)-2d, 1% of 1d', and

2% of (*E*)-**2d'** were formed with 40% of (*S*)-**1d** remained based on <sup>1</sup>H NMR analysis of the crude product) [eluent: petroleum ether / ethyl ether / dichloromethane = 30/1/1 (480 mL), then petroleum ether / ethyl acetate = 10/1 (660 mL)]: 97% ee (HPLC conditions: AS-H column, hexane/*i*PrOH = 98/2, 1.0 mL/min, λ = 214 nm, *t*<sub>R</sub> (minor) = 13.0 min, *t*<sub>R</sub> (major) = 18.8 min); oil; <sup>1</sup>H NMR (400 MHz, CDCl<sub>3</sub>): δ = 7.29-7.18 (m, 3 H, Ar-H), 6.85-6.76 (m, 1 H, Ar-H), 3.81 (s, 3 H, CH<sub>3</sub>), 2.46 (s, 1 H, OH), 2.27 (t, *J* = 7.0 Hz, 2 H, CH<sub>2</sub>), 1.73 (s, 3 H, CH<sub>3</sub>), 1.58-1.49 (m, 2 H, CH<sub>2</sub>), 1.49-1.38 (m, 2 H, CH<sub>2</sub>), 0.92 (t, *J* = 7.2 Hz, 3 H, CH<sub>3</sub>); <sup>13</sup>C NMR (100 MHz, CDCl<sub>3</sub>): δ = 159.4, 148.0, 129.2, 117.3, 112.9, 110.7, 85.5, 83.7, 69.9, 55.2, 33.5, 30.7, 21.9, 18.4, 13.5.

### (5) Preparation of (*S*)-2-(4-chlorophenyl)oct-3-yn-2-ol ((*S*)-**1e**) (wj-1-027-1)

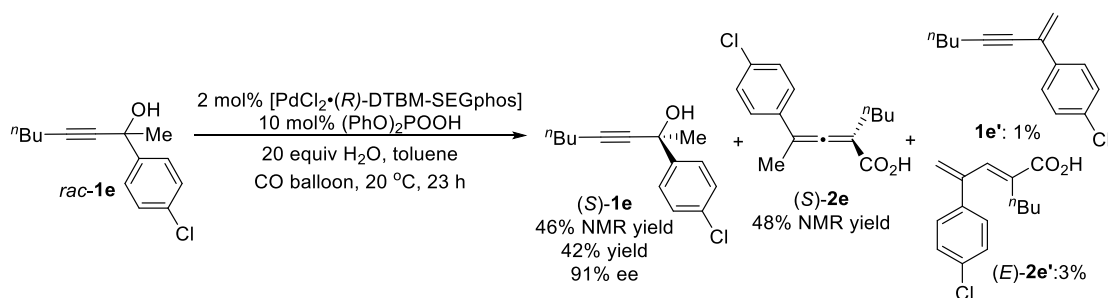

Following Typical Procedure II, the reaction of [PdCl<sub>2</sub>•(*R*)-DTBM-SEGphos] (13.6 mg, 0.01 mmol), (PhO)<sub>2</sub>PO<sub>2</sub>H (12.4 mg, 0.05 mmol), *rac*-**1e** (118.0 mg, 0.5 mmol), and H<sub>2</sub>O (180 μL, d = 1.0 g/mL, 180.0 mg, 10 mmol) in toluene (2.5 mL) afforded the product (*S*)-**1e** (49.1 mg, 42%) (48% NMR yield of (*S*)-**2e**, 1% of **1e'**, and 3% of (*E*)-**2e'** were formed with 46% of (*S*)-**1e** remained based on <sup>1</sup>H NMR analysis of the crude product) [eluent: petroleum ether / ethyl ether / dichloromethane = 30/1/1 (480 mL), then petroleum ether / ethyl acetate = 10/1 (550 mL)]: 91% ee (HPLC conditions: AS-H column, hexane/*i*PrOH = 98/2, 1.0 mL/min, λ = 214 nm, *t*<sub>R</sub> (minor) = 8.1 min, *t*<sub>R</sub> (major) = 11.1 min); oil; <sup>1</sup>H NMR (400 MHz, CDCl<sub>3</sub>): δ = 7.57 (d, *J* = 8.8 Hz, 2 H, Ar-H), 7.30 (d, *J* = 8.4 Hz, 2 H, Ar-H), 2.48-2.38 (m, 1 H, OH), 2.26 (t, *J* = 7.0 Hz, 2 H, CH<sub>2</sub>), 1.71 (s, 3 H, CH<sub>3</sub>), 1.58-1.48 (m, 2 H, CH<sub>2</sub>), 1.48-1.37 (m, 2 H, CH<sub>2</sub>), 0.92 (t, *J* = 7.2 Hz, 3 H, CH<sub>3</sub>); <sup>13</sup>C NMR (100 MHz, CDCl<sub>3</sub>): δ = 144.8, 133.2, 128.2, 126.5, 86.0, 83.3, 69.6, 33.6, 30.6, 21.9, 18.3, 13.5.



### (6) Preparation of (*S*)-2-(4-bromophenyl)oct-3-yn-2-ol ((*S*)-1f) (wj-1-028-1)

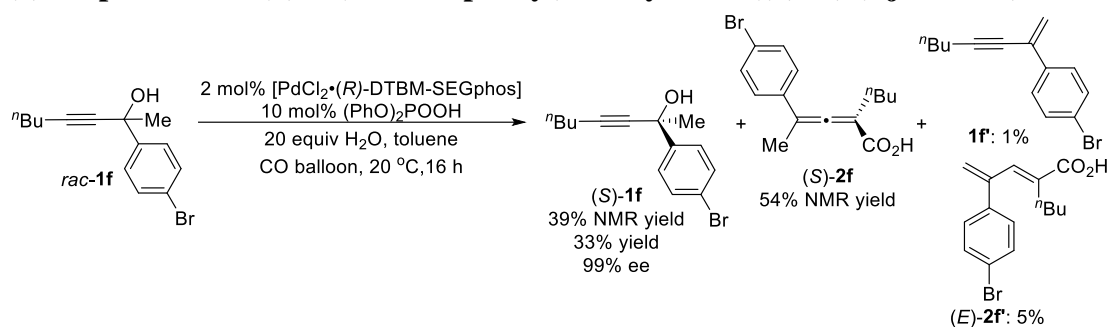

Following Typical Procedure II, the reaction of [PdCl<sub>2</sub>·(*R*)-DTBM-SEGphos] (13.5 mg, 0.01 mmol), (PhO)<sub>2</sub>PO<sub>2</sub>H (12.4 mg, 0.05 mmol), *rac*-1f (141.7 mg, 0.5 mmol), and H<sub>2</sub>O (180 μL, d = 1.0 g/mL, 180.0 mg, 10 mmol) in toluene (2.5 mL) afforded the product (*S*)-1f (47.0 mg, 33%) (54% NMR yield of (*S*)-2f, 1% of 1f\*, and 5% of (*E*)-2f\* were formed with 39% of (*S*)-1f remained based on <sup>1</sup>H NMR analysis of the crude product) [eluent: petroleum ether / ethyl ether / dichloromethane = 30/1/1 (480 mL), then petroleum ether/ethyl acetate = 10/1 (440 mL)]: 99% ee (HPLC conditions: AS-H column, hexane/<sup>i</sup>PrOH = 98/2, 1.0 mL/min, λ = 214 nm, t<sub>R</sub>(minor) = 8.3 min, t<sub>R</sub>(major) = 11.0 min); oil; <sup>1</sup>H NMR (400 MHz, CDCl<sub>3</sub>): δ = 7.52 (d, *J* = 8.4 Hz, 2 H, Ar-H), 7.46 (d, *J* = 8.8 Hz, 2 H, Ar-H), 2.45-2.33 (m, 1 H, OH), 2.26 (t, *J* = 7.0 Hz, 2 H, CH<sub>2</sub>), 1.70 (s, 3 H, CH<sub>3</sub>), 1.57-1.48 (m, 2 H, CH<sub>2</sub>), 1.48-1.36 (m, 2 H, CH<sub>2</sub>), 0.92 (t, *J* = 7.2 Hz, 3 H, CH<sub>3</sub>); <sup>13</sup>C NMR (100 MHz, CDCl<sub>3</sub>): δ = 145.4, 131.2, 126.9, 121.4, 86.0, 83.3, 69.6, 33.6, 30.6, 21.9, 18.3, 13.5.

### (7) Preparation of (*S*)-2-(4-methoxycarbonylphenyl)oct-3-yn-2-ol ((*S*)-1g) (wj-1-032-1)

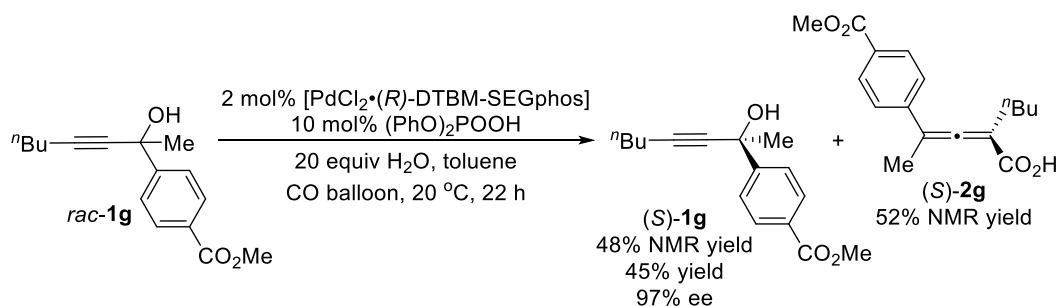

Following Typical Procedure II, the reaction of [PdCl<sub>2</sub>·(*R*)-DTBM-SEGphos] (13.5 mg, 0.01 mmol), (PhO)<sub>2</sub>PO<sub>2</sub>H (12.5 mg, 0.05 mmol), *rac*-1g (130.0 mg, 0.5 mmol), and H<sub>2</sub>O (180 μL, d = 1.0 g/mL, 180.0 mg, 10.0 mmol) in toluene (2.5 mL)

afforded the product (*S*)-**1g** (58.4 mg, 45%) (52% NMR yield of (*S*)-**2g** was formed with 48% of (*S*)-**1g** remained based on <sup>1</sup>H NMR analysis of the crude product) [eluent: petroleum ether / diethyl ether / dichloromethane = 30/1/1 (480 mL), then petroleum ether / ethyl acetate = 20/1(840 mL), 10/1 (550 mL)]: 97% ee (HPLC conditions: AS-H column, hexane/<sup>i</sup>PrOH = 90/10, 1.0 mL/min, λ = 214 nm, *t*<sub>R</sub> (major) = 6.8 min, *t*<sub>R</sub> (minor) = 7.5 min); [α]<sub>D</sub><sup>25</sup> = +4.8 (*c* = 1.17, CHCl<sub>3</sub>); oil; <sup>1</sup>H NMR (400 MHz, CDCl<sub>3</sub>): δ = 8.00 (d, *J* = 8.4 Hz, 2 H, Ar-H), 7.71 (d, *J* = 8.0 Hz, 2 H, Ar-H), 3.91 (s, 3 H, CH<sub>3</sub>), 2.64 (s, 1 H, OH), 2.27 (t, *J* = 7.0 Hz, 2 H, CH<sub>2</sub>), 1.73 (s, 3 H, CH<sub>3</sub>), 1.58-1.48 (m, 2 H, CH<sub>2</sub>), 1.48-1.37 (m, 2 H, CH<sub>2</sub>), 0.92 (t, *J* = 7.2 Hz, 3 H, CH<sub>3</sub>); <sup>13</sup>C NMR (100 MHz, CDCl<sub>3</sub>): δ = 166.9, 151.2, 129.5, 129.2, 125.0, 86.1, 83.2, 69.8, 52.0, 33.6, 30.6, 21.9, 18.3, 13.5; IR (neat): ν = 3461, 2956, 2932, 2873, 2243, 1723, 1707, 1610, 1437, 1407, 1278, 1184, 1113, 1059, 1019 cm<sup>-1</sup>; MS (70 eV, EI) *m/z* (%): 245 ((M-CH<sub>3</sub>)<sup>+</sup>, 100); HRMS (EI) calcd *m/z* for C<sub>15</sub>H<sub>17</sub>O<sub>3</sub> [M-CH<sub>3</sub>]<sup>+</sup>: 245.1172, found: 245.1172.

#### (8) Preparation of (*S*)-2-(2-naphthyl)oct-3-yn-2-ol ((*S*)-**1h**) (wj-4-134)

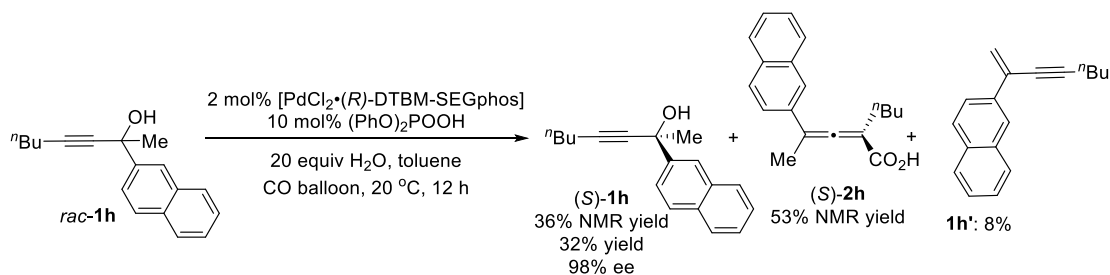

Following Typical Procedure II, the reaction of [PdCl<sub>2</sub>•(*R*)-DTBM-SEGphos] (13.6 mg, 0.01 mmol), (PhO)<sub>2</sub>PO<sub>2</sub>H (12.5 mg, 0.05 mmol), *rac*-**1h** (126.3 mg, 0.5 mmol), and H<sub>2</sub>O (180 μL, *d* = 1.0 g/mL, 180.0 mg, 10.0 mmol) in toluene (2.5 mL) afforded (*S*)-**1h** (39.9 mg, 32%) (53% NMR yield of (*S*)-**2h** and 8% of **1h'** were formed with 36% of (*S*)-**1h** remained based on <sup>1</sup>H NMR analysis of the crude product) [eluent: petroleum ether / ethyl ether / dichloromethane = 30/1/1 (640 mL)]: 98% ee (HPLC conditions: AS-H column, hexane/<sup>i</sup>PrOH = 95/5, 1.0 mL/min, λ = 214 nm, *t*<sub>R</sub> (minor) = 7.1 min, *t*<sub>R</sub> (major) = 8.4 min); oil; <sup>1</sup>H NMR (400 MHz, CDCl<sub>3</sub>): δ = 8.15-8.09 (m, 1 H, Ar-H), 7.89-7.78 (m, 3 H, Ar-H), 7.77-7.70 (m, 1 H, Ar-H), 7.52-7.42 (m, 2 H, Ar-H), 2.47 (s, 1 H, OH), 2.31 (t, *J* = 7.2 Hz, 2 H, CH<sub>2</sub>), 1.82 (s, 3 H, CH<sub>3</sub>), 1.60-1.51 (m, 2 H,

CH<sub>2</sub>), 1.51-1.40 (m, 2 H, CH<sub>2</sub>), 0.94 (t, *J* = 7.2 Hz, 3 H, CH<sub>3</sub>); <sup>13</sup>C NMR (100 MHz, CDCl<sub>3</sub>): δ = 143.5, 133.0, 132.8, 128.3, 128.0, 127.5, 126.1, 125.9, 123.6, 123.3, 85.9, 83.8, 70.1, 33.4, 30.7, 22.0, 18.4, 13.6.

**(9) Preparation of (S)-2-cyclohexyloct-3-yn-2-ol ((S)-1i) (wj-1-038-1)**

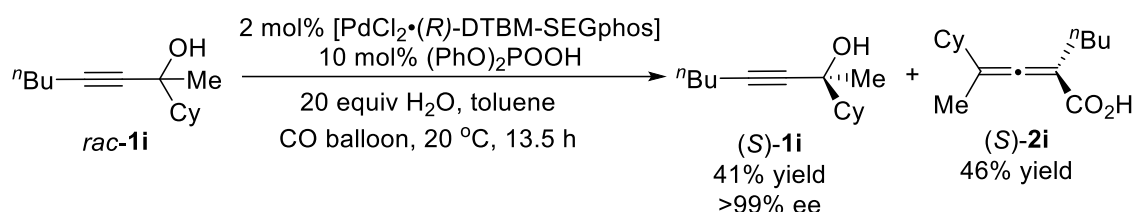

Following Typical Procedure II, the reaction of [PdCl<sub>2</sub>·(*R*)-DTBM-SEGphos] (13.7 mg, 0.01 mmol), (PhO)<sub>2</sub>PO<sub>2</sub>H (12.6 mg, 0.05 mmol), *rac*-**1i** (103.7 mg, 0.5 mmol), and H<sub>2</sub>O (180 μL, *d* = 1.0 g/mL, 180.0 mg, 10.0 mmol) in toluene (2.5 mL) afforded the product *(S)*-**1i** (42.5 mg, 41%) (Feature peak overlap based on <sup>1</sup>H NMR analysis of the crude product) [eluent: petroleum ether / ethyl ether / dichloromethane = 30/1/1 (480 mL), then petroleum ether / ethyl acetate = 10/1 (330 mL)]: > 99% ee (HPLC conditions: AS-H column, hexane/*i*PrOH = 98/2, 1.0 mL/min, λ = 214 nm, *t*<sub>R</sub> (major) = 6.0 min); [α]<sub>D</sub><sup>25</sup> = +6.6 (*c* = 1.25, CHCl<sub>3</sub>); oil; <sup>1</sup>H NMR (400 MHz, CDCl<sub>3</sub>): δ = 2.20 (t, *J* = 6.8 Hz, 2 H, CH<sub>2</sub>), 2.00-1.75 (m, 5 H, 2 x CH<sub>2</sub> and OH), 1.54-1.03 (m, 14 H, CH and 5 x CH<sub>2</sub> and CH<sub>3</sub>), 0.91 (t, *J* = 7.0 Hz, 3 H, CH<sub>3</sub>); <sup>13</sup>C NMR (100 MHz, CDCl<sub>3</sub>): δ = 84.3, 83.4, 71.1, 48.9, 30.9, 27.9, 27.6, 27.3, 26.34, 26.31, 26.2, 21.9, 18.3, 13.5; IR (neat): ν = 3419, 2926, 2854, 1751, 1450, 1370, 1328, 1247, 1191, 1145, 1111, 1068, 1046 cm<sup>-1</sup>; MS (ESI) *m/z*(%): 209 (M+H<sup>+</sup>); HRMS (ESI) calcd for C<sub>14</sub>H<sub>25</sub>O [M+H<sup>+</sup>]: 209.1900, found: 209.1896.

**(10) Preparation of (S)-2,2,3-trimethylnon-4-yn-3-ol ((S)-1j) (wj-1-055-1)**

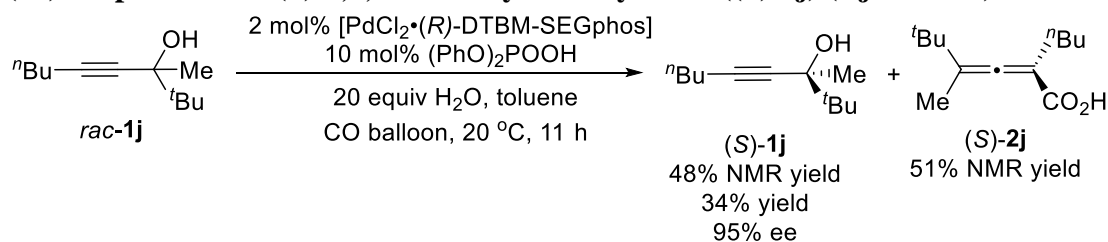

Following Typical Procedure II, the reaction of [PdCl<sub>2</sub>·(*R*)-DTBM-SEGphos] (13.6

mg, 0.01 mmol), (PhO)<sub>2</sub>PO<sub>2</sub>H (12.5 mg, 0.05 mmol), *rac*-**1j** (92.4 mg, 0.5 mmol), and H<sub>2</sub>O (180 μL, d = 1.0 g/mL, 180.0 mg, 10.0 mmol) in toluene (2.5 mL) afforded the product (*S*)-**1j** (31.0 mg, 34%) (51% NMR yield of (*S*)-**2j** with 48% of (*S*)-**1j** remained based on <sup>1</sup>H NMR analysis of the crude product) [eluent: petroleum ether / diethyl ether / DCM = 30/1/1 (320 mL), then petroleum ether / ethyl acetate = 10/1 (330 mL)]: 95% ee (HPLC conditions: IC column, hexane/<sup>i</sup>PrOH = 98/2, 1.0 mL/min, λ = 214 nm, *t*<sub>R</sub> (minor) = 4.2 min, *t*<sub>R</sub> (major) = 4.5 min); oil; <sup>1</sup>H NMR (400 MHz, CDCl<sub>3</sub>): δ = 2.20 (t, *J* = 6.8 Hz, 2 H, CH<sub>2</sub>), 1.82 (s, 1 H, OH), 1.54-1.37 (m, 7 H, 2 x CH<sub>2</sub> and CH<sub>3</sub>), 1.03 (s, 9 H, 3 x CH<sub>3</sub>), 0.91 (t, *J* = 7.2 Hz, 3 H, CH<sub>3</sub>); <sup>13</sup>C NMR (100 MHz, CDCl<sub>3</sub>): δ = 84.2, 83.8, 74.0, 38.2, 30.9, 25.1, 25.0, 21.9, 18.3, 13.5.

### (11) Preparation of (*S*)-2-phenylnon-3-yn-2-ol ((*S*)-**1k**) (wj-1-051-1)

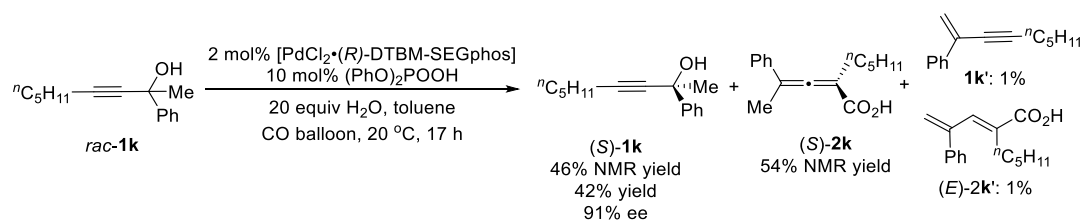

Following Typical Procedure II, the reaction of [PdCl<sub>2</sub>•(*R*)-DTBM-SEGphos] (13.7 mg, 0.01 mmol), (PhO)<sub>2</sub>PO<sub>2</sub>H (12.5 mg, 0.05 mmol), *rac*-**1k** (108.5 mg, 0.5 mmol), and H<sub>2</sub>O (180 μL, d = 1.0 g/mL, 180.0 mg, 10.0 mmol) in toluene (2.5 mL) afforded the product (*S*)-**1k** (45.6 mg, 42%) (54% NMR yield of (*S*)-**2k**, 1% of **1k'**, and 1% of (*E*)-**2k'** were formed with 46% of (*S*)-**1k** remained based on <sup>1</sup>H NMR analysis of the crude product) [eluent: petroleum ether / ethyl ether / dichloromethane = 30/1/1 (480 mL), then petroleum ether / ethyl acetate = 10/1 (440 mL)]: 91% ee (HPLC conditions: AS-H column, hexane/<sup>i</sup>PrOH = 98/2, 1.0 mL/min, λ = 214 nm, *t*<sub>R</sub> (minor) = 6.5 min, *t*<sub>R</sub> (major) = 9.4 min); oil; <sup>1</sup>H NMR (400 MHz, CDCl<sub>3</sub>): δ = 7.65 (d, *J* = 7.6 Hz, 2 H, Ar-H), 7.34 (t, *J* = 7.4 Hz, 2 H, Ar-H), 7.30-7.23 (m, 1 H, Ar-H), 2.38 (m, 1 H, OH), 2.26 (t, *J* = 7.2 Hz, 2 H, CH<sub>2</sub>), 1.74 (s, 3 H, CH<sub>3</sub>), 1.55 (quint, *J* = 7.2 Hz, 2 H, CH<sub>2</sub>), 1.44-1.27 (m, 4 H, 2 x CH<sub>2</sub>), 0.91 (t, *J* = 7.0 Hz, 3 H, CH<sub>3</sub>); <sup>13</sup>C NMR (100 MHz, CDCl<sub>3</sub>): δ = 146.2, 128.1, 127.4, 125.0, 85.7, 83.8, 70.0, 33.5, 31.1, 28.3, 22.1, 18.7, 13.9.

## (12) Preparation of (*S*)-2-phenyldec-3-yn-2-ol ((*S*)-**11**) (wj-1-054-1)

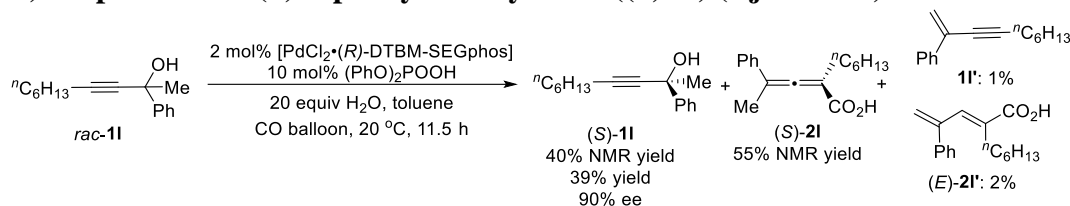

Following Typical Procedure II, the reaction of [PdCl<sub>2</sub>•(*R*)-DTBM-SEGphos] (13.5 mg, 0.01 mmol), (PhO)<sub>2</sub>PO<sub>2</sub>H (12.4 mg, 0.05 mmol), *rac*-**11** (116.0 mg, 0.5 mmol), and H<sub>2</sub>O (180 μL, d = 1.0 g/mL, 180.0 mg, 10.0 mmol) in toluene (2.5 mL) afforded the product (*S*)-**11** (44.8 mg, 39%) (55% NMR yield of (*S*)-**21**, 1% of **11'**, and 2% of (*E*)-**21'** were formed with 40% of (*S*)-**11** remained based on <sup>1</sup>H NMR analysis of the crude product) [eluent: petroleum ether / ethyl ether / dichloromethane = 30/1/1 (480 mL), then petroleum ether / ethyl acetate = 10/1 (440 mL)]: 90% ee (HPLC conditions: AS-H column, hexane/*i*PrOH = 98/2, 1.0 mL/min, λ = 214 nm, *t*<sub>R</sub> (minor) = 6.0 min, *t*<sub>R</sub> (major) = 8.5 min); oil; <sup>1</sup>H NMR (400 MHz, CDCl<sub>3</sub>): δ = 7.65 (d, *J* = 7.6 Hz, 2 H, Ar-H), 7.34 (t, *J* = 7.4 Hz, 2 H, Ar-H), 7.29-7.23 (m, 1 H, Ar-H), 2.43-2.33 (m, 1 H, OH), 2.26 (t, *J* = 7.2 Hz, 2 H, CH<sub>2</sub>), 1.74 (s, 3 H, CH<sub>3</sub>), 1.55 (quint, *J* = 7.2 Hz, 2 H, CH<sub>2</sub>), 1.47-1.36 (m, 2 H, CH<sub>2</sub>), 1.35-1.24 (m, 4 H, 2 x CH<sub>2</sub>), 0.89 (t, *J* = 6.8 Hz, 3 H, CH<sub>3</sub>); <sup>13</sup>C NMR (100 MHz, CDCl<sub>3</sub>): δ = 146.2, 128.2, 127.5, 125.0, 85.7, 83.8, 70.0, 33.5, 31.3, 28.6, 28.5, 22.5, 18.7, 14.0.

## (13) Preparation of (*S*)-2-(*o*-tolyl)undec-3-yn-2-ol ((*S*)-**1m**) (wj-1-072-1)

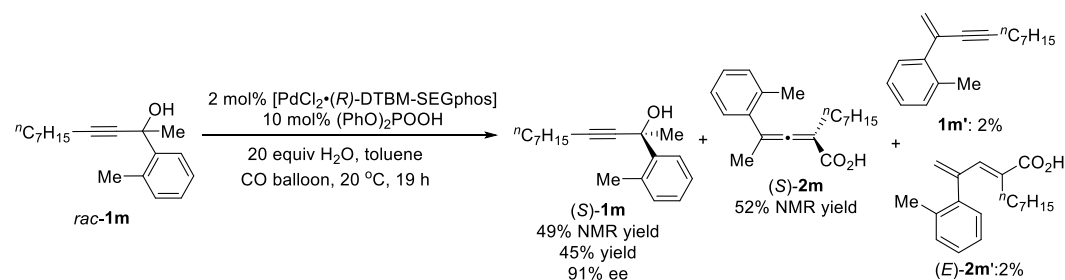

Following Typical Procedure II, the reaction of [PdCl<sub>2</sub>•(*R*)-DTBM-SEGphos] (13.7 mg, 0.01 mmol), (PhO)<sub>2</sub>PO<sub>2</sub>H (12.5 mg, 0.05 mmol), *rac*-**1m** (129.1 mg, 0.5 mmol), and H<sub>2</sub>O (180 μL, d = 1.0 g/mL, 180.0 mg, 10.0 mmol) in toluene (2.5 mL) afforded the product (*S*)-**1m** (57.9 mg, 45%) (52% NMR yield of (*S*)-**2m**, 2% of **1m'**, and 2% of (*E*)-**2m'** were formed with 49% of (*S*)-**1m** remained based on <sup>1</sup>H NMR analysis of the

crude product) [eluent: petroleum ether / ethyl ether / dichloromethane = 30/1/1 (416 mL), then petroleum ether / ethyl acetate = 8/1 (360 mL)]: 91% ee (HPLC conditions: AS-H column, hexane/<sup>i</sup>PrOH = 98/2, 1.0 mL/min,  $\lambda$  = 214 nm,  $t_R$  (minor) = 4.9 min,  $t_R$  (major) = 5.9 min);  $[\alpha]_D^{26}$  = -2.4 ( $c$  = 1.02, CHCl<sub>3</sub>); oil; <sup>1</sup>H NMR (400 MHz, CDCl<sub>3</sub>):  $\delta$  = 7.73-7.65 (m, 1 H, Ar-H), 7.21-7.07 (m, 3 H, Ar-H), 2.62 (s, 3 H, CH<sub>3</sub>), 2.31 (s, 1 H, OH), 2.23 (t,  $J$  = 7.2 Hz, 2 H, CH<sub>2</sub>), 1.80 (s, 3 H, CH<sub>3</sub>), 1.52 (quint,  $J$  = 7.2 Hz, 2 H, CH<sub>2</sub>), 1.42-1.20 (m, 8 H, 4 x CH<sub>2</sub>), 0.88 (t,  $J$  = 6.8 Hz, 3 H, CH<sub>3</sub>); <sup>13</sup>C NMR (100 MHz, CDCl<sub>3</sub>):  $\delta$  = 142.9, 135.6, 132.2, 127.5, 125.6, 125.0, 85.3, 84.1, 69.7, 31.7, 31.1, 28.8, 28.7, 28.5, 22.6, 21.2, 18.7, 14.0; IR (neat):  $\nu$  = 3428, 2928, 2856, 2240, 1456, 1367, 1329, 1221, 1078, 1059, 1047 cm<sup>-1</sup>; MS (70 eV, EI)  $m/z$  (%): 258 (M<sup>+</sup>, 3.42), 243 (100); HRMS (EI) calcd for C<sub>17</sub>H<sub>23</sub>O [M-CH<sub>3</sub>]<sup>+</sup>: 243.1743, found: 243.1742.

#### (14) Preparation of (*S*)-2-(4-chlorophenyl)dodec-3-yn-2-ol ((*S*)-**1n**) (wj-1-069-1)

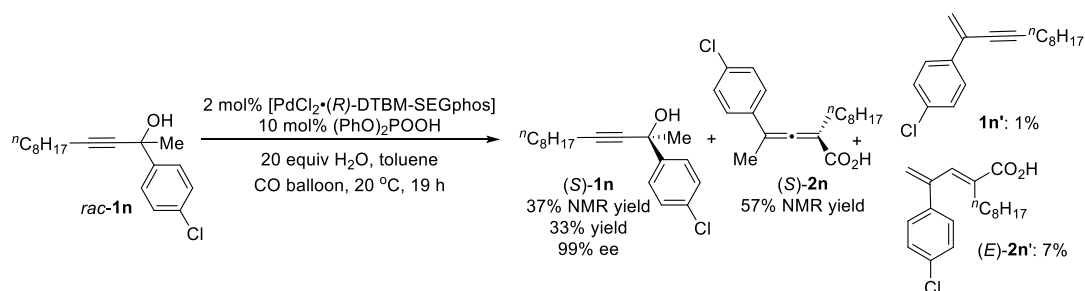

Following Typical Procedure II, the reaction of [PdCl<sub>2</sub>•(*R*)-DTBM-SEGphos] (13.7 mg, 0.01 mmol), (PhO)<sub>2</sub>PO<sub>2</sub>H (12.4 mg, 0.05 mmol), *rac*-**1n** (146.3 mg, 0.5 mmol), and H<sub>2</sub>O (180  $\mu$ L,  $d$  = 1.0 g/mL, 180.0 mg, 10.0 mmol) in toluene (2.5 mL) afforded the product (*S*)-**1n** (48.0 mg, 33%) (57% NMR yield of (*S*)-**2n**, 1% of **1n'**, and 7% of (*E*)-**2n'** were formed with 37% of (*S*)-**1n** remained based on <sup>1</sup>H NMR analysis of the crude product) [eluent: petroleum ether / ethyl ether / dichloromethane = 30/1/1 (480 mL), then petroleum ether / ethyl acetate = 10/1 (660 mL)]: 99% ee (HPLC conditions: AS-H column, hexane/<sup>i</sup>PrOH = 98/2, 1.0 mL/min,  $\lambda$  = 214 nm,  $t_R$  (minor) = 5.4 min,  $t_R$  (major) = 6.6 min);  $[\alpha]_D^{27}$  = -2.5 ( $c$  = 1.16, CHCl<sub>3</sub>); oil; <sup>1</sup>H NMR (400 MHz, CDCl<sub>3</sub>):  $\delta$  = 7.58 (d,  $J$  = 8.0 Hz, 2 H, Ar-H), 7.30 (d,  $J$  = 8.0 Hz, 2 H, Ar-H), 2.39 (s, 1 H, OH), 2.25 (t,  $J$  = 7.0 Hz, 2 H, CH<sub>2</sub>), 1.71 (s, 3 H, CH<sub>3</sub>), 1.59-1.47 (m, 2 H, CH<sub>2</sub>), 1.45-1.34 (m, 2 H, CH<sub>2</sub>), 1.34-1.16 (m, 8 H, 4 x CH<sub>2</sub>), 0.94-0.78 (m, 3 H, CH<sub>3</sub>); <sup>13</sup>C NMR (100

MHz, CDCl<sub>3</sub>):  $\delta$  = 144.8, 133.2, 128.2, 126.5, 86.1, 83.3, 69.6, 33.6, 31.8, 29.2, 29.0, 28.9, 28.5, 22.6, 18.7, 14.1; **IR** (neat):  $\nu$  = 3393, 2926, 2855, 2243, 1489, 1466, 1400, 1368, 1329, 1229, 1173, 1092, 1015 cm<sup>-1</sup>; **MS** (70 eV, EI)  $m/z$  (%): 294 (M<sup>+</sup>(<sup>37</sup>Cl), 0.76), 292 (M<sup>+</sup>(<sup>35</sup>Cl), 2.04), 277 (100); **HRMS** (EI) calcd for C<sub>17</sub>H<sub>22</sub><sup>35</sup>ClO [M-CH<sub>3</sub>]<sup>+</sup>: 277.1354, found: 277.1357.

### (15) Preparation of (*S*)-7-methyl-2-phenyloct-3-yn-2-ol ((*S*)-**1o**) (wj-1-120-1)

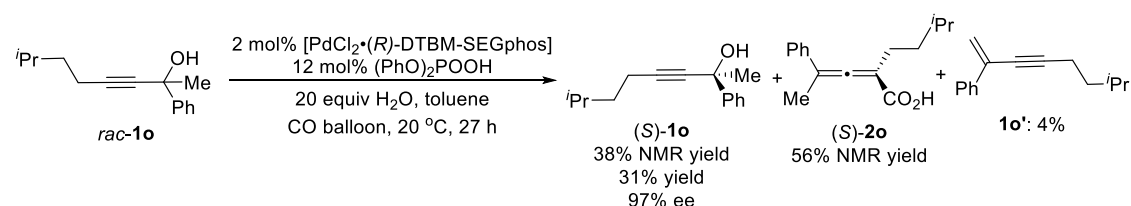

Following Typical Procedure II, the reaction of [PdCl<sub>2</sub>·(*R*)-DTBM-SEGphos] (13.5 mg, 0.01 mmol), (PhO)<sub>2</sub>PO<sub>2</sub>H (15.1 mg, 0.06 mmol), *rac*-**1o** (107.0 mg, 0.5 mmol), and H<sub>2</sub>O (180  $\mu$ L,  $d$  = 1.0 g/mL, 180.0 mg, 10.0 mmol) in toluene (2.5 mL) afforded the product (*S*)-**1o** (33.2 mg, 31%) (56% NMR yield of (*S*)-**2o** and 4% of **1o'** were formed with 38% of (*S*)-**1o** remained based on <sup>1</sup>H NMR analysis of the crude product) [eluent: petroleum ether / ethyl ether / dichloromethane = 30/1/1 (448 mL), then petroleum ether / ethyl acetate = 8/1 (450 mL)]: 97% ee (HPLC conditions: AS-H column, hexane/<sup>i</sup>PrOH = 98/2, 1.0 mL/min,  $\lambda$  = 214 nm,  $t_R$  (minor) = 6.7 min,  $t_R$  (major) = 9.2 min); oil; **<sup>1</sup>H NMR** (400 MHz, CDCl<sub>3</sub>):  $\delta$  = 7.70-7.62 (m, 2 H, Ar-H), 7.39-7.31 (m, 2 H, Ar-H), 7.31-7.24 (m, 1 H, Ar-H), 2.35 (s, 1 H, OH), 2.28 (t,  $J$  = 7.4 Hz, 2 H, CH<sub>2</sub>), 1.81-1.64 (m, 4 H, CH and CH<sub>3</sub>), 1.45 (q,  $J$  = 7.3 Hz, 2 H, CH<sub>2</sub>), 0.91 (d,  $J$  = 6.4 Hz, 6 H, 2 x CH<sub>3</sub>); **<sup>13</sup>C NMR** (100 MHz, CDCl<sub>3</sub>):  $\delta$  = 146.2, 128.1, 127.4, 124.9, 85.7, 83.6, 70.0, 37.6, 33.5, 27.3, 22.1, 16.7.

### (16) Preparation of (*S*)-8-chloro-2-phenyloct-3-yn-2-ol ((*S*)-**1p**) (wj-1-057-1)

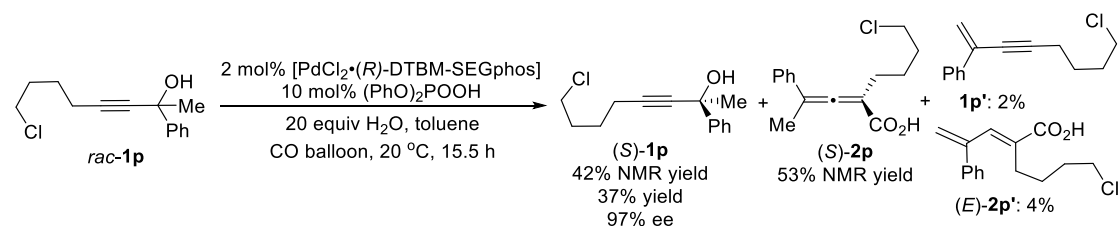

Following Typical Procedure II, the reaction of [PdCl<sub>2</sub>•(*R*)-DTBM-SEGphos] (13.5 mg, 0.01 mmol), (PhO)<sub>2</sub>PO<sub>2</sub>H (12.5 mg, 0.05 mmol), *rac*-**1p** (118.7 mg, 0.5 mmol), and H<sub>2</sub>O (180 μL, d = 1.0 g/mL, 180.0 mg, 10.0 mmol) in toluene (2.5 mL) afforded the product (*S*)-**1p** (44.4 mg, 37%) (53% NMR yield of (*S*)-**2p**, 2% of **1p'**, and 4% of (*E*)-**2p'** were formed with 42% of (*S*)-**1p** remained based on <sup>1</sup>H NMR analysis of the crude product) [eluent: petroleum ether / ethyl ether / dichloromethane = 30/1/1 (704 mL), then petroleum ether / ethyl acetate = 8/1 (630 mL)]: 97% ee (HPLC conditions: AS-H column, hexane/<sup>*i*</sup>PrOH = 95/5, 1.0 mL/min, λ = 214 nm, *t*<sub>R</sub> (minor) = 9.1 min, *t*<sub>R</sub> (major) = 15.8 min); oil; <sup>1</sup>H NMR (400 MHz, CDCl<sub>3</sub>): δ = 7.64 (d, *J* = 7.6 Hz, 2 H, Ar-H), 7.35 (t, *J* = 7.4 Hz, 2 H, Ar-H), 7.31-7.23 (m, 1 H, Ar-H), 3.56 (t, *J* = 6.6 Hz, 2 H, CH<sub>2</sub>), 2.49-2.14 (m, 3 H, OH and CH<sub>2</sub>), 1.91 (quint, *J* = 7.0 Hz, 2 H, CH<sub>2</sub>), 1.77-1.64 (m, 5 H, CH<sub>2</sub> and CH<sub>3</sub>); <sup>13</sup>C NMR (100 MHz, CDCl<sub>3</sub>): δ = 146.0, 128.2, 127.5, 124.9, 84.6, 84.5, 70.0, 44.4, 33.4, 31.6, 25.7, 18.0.

#### (17) Preparation of (*S*)-2,6-diphenylhex-3-yn-2-ol ((*S*)-**1q**) (wj-1-111-1)

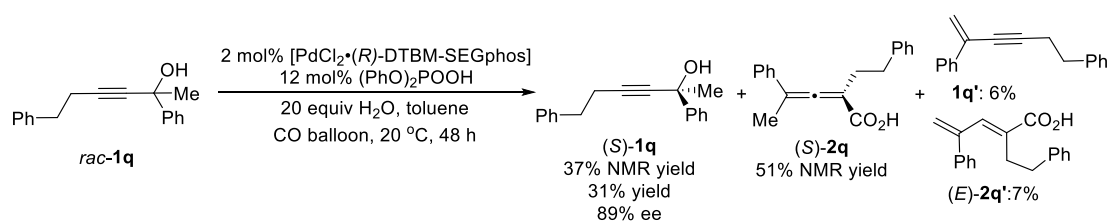

Following Typical Procedure II, the reaction of [PdCl<sub>2</sub>•(*R*)-DTBM-SEGphos] (13.6 mg, 0.01 mmol), (PhO)<sub>2</sub>PO<sub>2</sub>H (15.1 mg, 0.06 mmol), *rac*-**1q** (125.0 mg, 0.5 mmol), and H<sub>2</sub>O (180 μL, d = 1.0 g/mL, 180.0 mg, 10.0 mmol) in toluene (2.5 mL) afforded the product (*S*)-**1q** (39.0 mg, 31%) (51% NMR yield of (*S*)-**2q**, 6% of **1q'**, and 7% of (*E*)-**2q'** were formed with 37% of (*S*)-**1q** remained based on <sup>1</sup>H NMR analysis of the crude product) [eluent: petroleum ether / ethyl ether / dichloromethane = 30/1/1 (790 mL), then petroleum ether / ethyl acetate = 8/1 (450 mL)]: 89% ee (HPLC conditions: AS-H column, hexane/<sup>*i*</sup>PrOH = 98/2, 1.0 mL/min, λ = 214 nm, *t*<sub>R</sub> (minor) = 12.9 min, *t*<sub>R</sub> (major) = 16.6 min); oil; <sup>1</sup>H NMR (400 MHz, CDCl<sub>3</sub>): δ = 7.59-7.52 (m, 2 H, Ar-H), 7.37-7.17 (m, 8 H, Ar-H), 2.86 (t, *J* = 7.4 Hz, 2 H, CH<sub>2</sub>), 2.57 (t, *J* = 7.4 Hz, 2 H, CH<sub>2</sub>), 2.30 (s, 1 H, OH), 1.71 (s, 3 H, CH<sub>3</sub>); <sup>13</sup>C NMR (100 MHz, CDCl<sub>3</sub>): δ =



145.9, 140.5, 128.5, 128.4, 128.1, 127.5, 126.3, 124.9, 84.7, 84.6, 69.9, 34.9, 33.4, 20.9.

### (18) Preparation of (*S*)-7-cyano-2-phenylhept-3-yn-2-ol ((*S*)-1r) (wj-1-082-1)

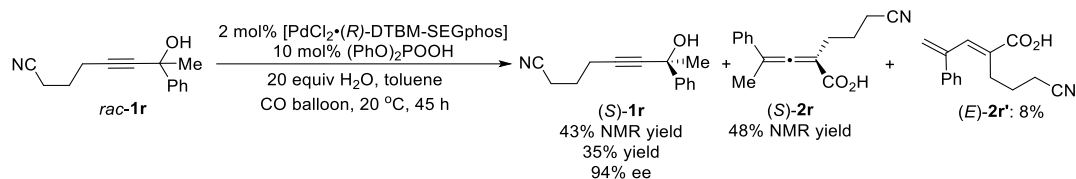

Following Typical Procedure II, the reaction of [PdCl<sub>2</sub>•(*R*)-DTBM-SEGphos] (13.6 mg, 0.01 mmol), (PhO)<sub>2</sub>PO<sub>2</sub>H (12.5 mg, 0.05 mmol), *rac*-1r (106.0 mg, 0.5 mmol), and H<sub>2</sub>O (180 μL, d = 1.0 g/mL, 180.0 mg, 10.0 mmol) in toluene (2.5 mL) afforded the product (*S*)-1r (36.8 mg, 35%) (48% NMR yield of (*S*)-2r and 8% of (*E*)-2r' were formed with 43% of (*S*)-1r remained based on <sup>1</sup>H NMR analysis of the crude product) [eluent: petroleum ether / ethyl acetate = 8/1 (1080 mL) to 5/1(840 mL)]: 94% ee (HPLC conditions: AS-H column, hexane/<sup>i</sup>PrOH = 90/10, 1.0 mL/min, λ = 214 nm, *t*<sub>R</sub> (minor) = 17.1 min, *t*<sub>R</sub> (major) = 29.4 min); oil; <sup>1</sup>H NMR (400 MHz, CDCl<sub>3</sub>): δ = 7.62 (d, *J* = 7.2 Hz, 2 H, Ar-H), 7.36 (t, *J* = 7.4 Hz, 2 H, Ar-H), 7.32-7.24 (m, 1 H, Ar-H), 2.75-2.33 (m, 5 H, OH and 2 x CH<sub>2</sub>), 1.89 (quint, *J* = 6.9 Hz, 2 H, CH<sub>2</sub>), 1.75 (s, 3 H, CH<sub>3</sub>); <sup>13</sup>C NMR (100 MHz, CDCl<sub>3</sub>): δ = 145.7, 128.2, 127.6, 124.7, 119.1, 85.9, 82.3, 69.8, 33.3, 24.3, 17.9, 16.2.

### (19) Preparation of (*S*)-2-phenylhept-6-en-3-yn-2-ol ((*S*)-1s) (wj-1-134)

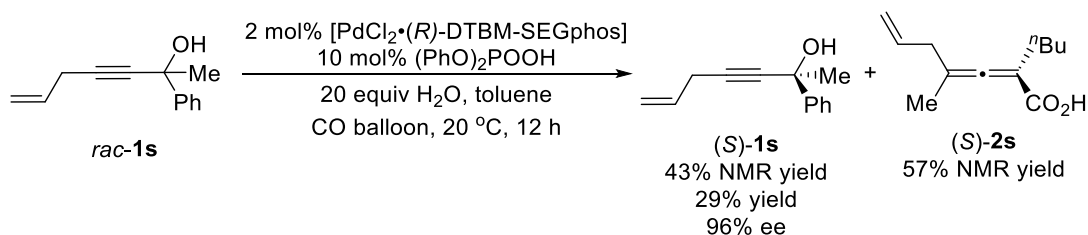

Following Typical Procedure II, the reaction of [PdCl<sub>2</sub>•(*R*)-DTBM-SEGphos] (13.6 mg, 0.01 mmol), (PhO)<sub>2</sub>PO<sub>2</sub>H (12.6 mg, 0.05 mmol), *rac*-1s (93.1 mg, 0.5 mmol), and H<sub>2</sub>O (180 μL, d = 1.0 g/mL, 180.0 mg, 10.0 mmol) in toluene (2.5 mL) afforded the product (*S*)-1s (27.3 mg, 29%) (57% NMR yield of (*S*)-2s was formed with 43% of (*S*)-1s remained based on <sup>1</sup>H NMR analysis of the crude product) [eluent: petroleum ether / ethyl ether / dichloromethane = 30/1/1 (960 mL): 96% ee (HPLC conditions: AS-H

column, hexane/<sup>i</sup>PrOH = 98/2, 1.0 mL/min, λ = 214 nm, *t*<sub>R</sub> (minor) = 10.0 min, *t*<sub>R</sub> (major) = 12.4 min); oil; <sup>1</sup>H NMR (400 MHz, CDCl<sub>3</sub>): δ = 7.66 (d, *J* = 7.6 Hz, 2 H, Ar-H), 7.36 (t, *J* = 7.6 Hz, 2 H, Ar-H), 7.31-7.23 (m, 1 H, Ar-H), 5.91-5.78 (m, 1 H, CH), 5.35 (dd, *J*<sub>1</sub> = 16.8 Hz, *J*<sub>2</sub> = 1.6 Hz, 1 H, one proton of =CH<sub>2</sub>), 5.14 (dd, *J*<sub>1</sub> = 10.0 Hz, *J*<sub>2</sub> = 1.6 Hz, 1 H, one proton of =CH<sub>2</sub>), 3.10-3.03 (m, 2 H, CH<sub>2</sub>), 2.38 (s, 1 H, OH), 1.77 (s, 3 H, CH<sub>3</sub>); <sup>13</sup>C NMR (100 MHz, CDCl<sub>3</sub>): δ = 145.9, 132.3, 128.2, 127.6, 124.9, 116.3, 86.2, 82.0, 70.0, 33.5, 23.0.

**(20) Preparation of (*S*)-3-(*o*-tolyl)oct-4-yn-3-ol ((*S*)-1t) (wj-1-122-1)**

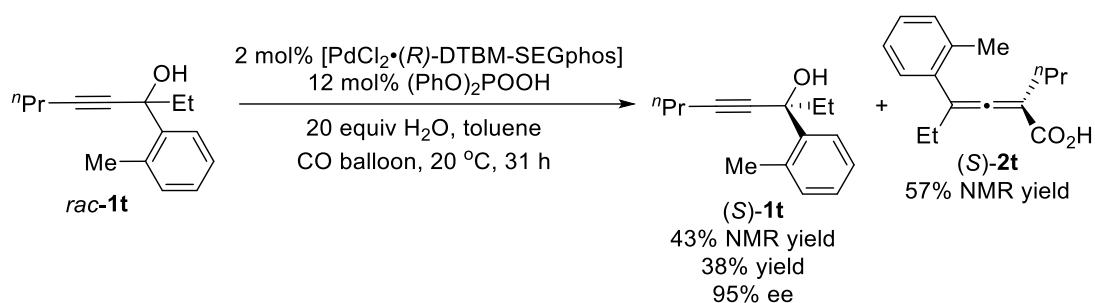

Following Typical Procedure II, the reaction of [PdCl<sub>2</sub>•(*R*)-DTBM-SEGphos] (13.7 mg, 0.01 mmol), (PhO)<sub>2</sub>PO<sub>2</sub>H (14.9 mg, 0.06 mmol), *rac*-1t (107.7 mg, 0.5 mmol), and H<sub>2</sub>O (180 μL, d = 1.0 g/mL, 180.0 mg, 10.0 mmol) in toluene (2.5 mL) afforded the product (*S*)-1t (40.8 mg, 38%) (57% NMR yield of (*S*)-2t was formed with 43% of (*S*)-1t remained based on <sup>1</sup>H NMR analysis of the crude product) [eluent: petroleum ether / ethyl ether / dichloromethane = 50/1/1 (520 mL), then petroleum ether / ethyl acetate = 8/1 (360 mL)]: 95% ee (HPLC conditions: AS-H column, hexane/<sup>i</sup>PrOH = 98/2, 1.0 mL/min, λ = 214 nm, *t*<sub>R</sub> (minor) = 5.5 min, *t*<sub>R</sub> (major) = 7.0 min); oil; <sup>1</sup>H NMR (400 MHz, CDCl<sub>3</sub>): δ = 7.76-7.69 (m, 1 H, Ar-H), 7.21-7.12 (m, 3 H, Ar-H), 2.58 (s, 3 H, CH<sub>3</sub>), 2.28-2.20 (m, 3 H, CH<sub>2</sub> and OH), 2.09-1.90 (m, 2 H, CH<sub>2</sub>), 1.63-1.51 (m, 2 H, CH<sub>2</sub>), 1.06-0.92 (m, 6 H, 2 x CH<sub>3</sub>); <sup>13</sup>C NMR (100 MHz, CDCl<sub>3</sub>): δ = 142.0, 135.4, 132.2, 127.3, 126.2, 125.4, 86.5, 83.1, 73.8, 35.2, 22.0, 21.3, 20.8, 13.6, 8.9.

## Synthesis of chiral 2,3-allenoic acids

### (1) Preparation of (*S*)-2-butyl-4-phenyl-2,3-pentadienoic acid ((*S*)-2a) (wj-1-013-2)

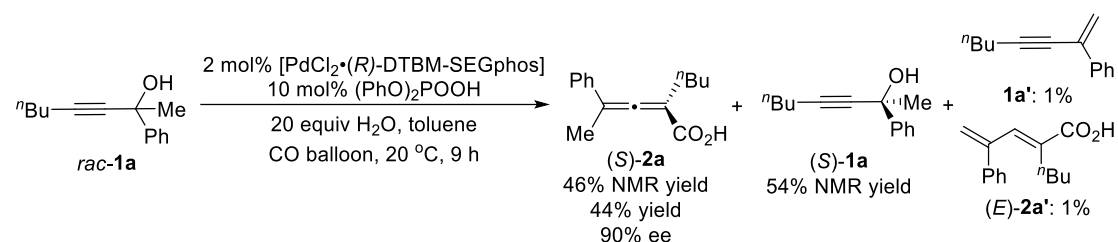

Following Typical Procedure II, the reaction of [PdCl<sub>2</sub>•(*R*)-DTBM-SEGphos] (13.5 mg, 0.01 mmol), (PhO)<sub>2</sub>PO<sub>2</sub>H (12.4 mg, 0.05 mmol), *rac*-1a (102.5 mg, 0.5 mmol), and H<sub>2</sub>O (180 μL, d = 1.0 g/mL, 18.0 mg, 10 mmol) in toluene (2.5 mL) afforded the product (*S*)-2a (51.2 mg, 44%) (46% NMR yield of (*S*)-2a, 1% of 1a', and 1% of (*E*)-2a' were formed with 54% of (*S*)-1a remained based on <sup>1</sup>H NMR analysis of the crude product) [eluent: petroleum ether / ethyl ether / dichloromethane = 30/1/1 (640 mL), then petroleum ether / ethyl acetate = 10/1 (440 mL)]: 90% ee (HPLC conditions: AS-H column, hexane/<sup>i</sup>PrOH = 98/2, 1.0 mL/min, λ = 214 nm, t<sub>R</sub> (major) = 8.6 min, t<sub>R</sub> (minor) = 11.6 min); solid; <sup>1</sup>H NMR (400 MHz, CDCl<sub>3</sub>): δ = 7.42-7.29 (m, 4 H, Ar-H), 7.28-7.21 (m, 1 H, Ar-H), 2.32 (t, *J* = 7.6 Hz, 2 H, CH<sub>2</sub>), 2.19 (s, 3 H, CH<sub>3</sub>), 1.52-1.42 (m, 2 H, CH<sub>2</sub>), 1.40-1.29 (m, 2 H, CH<sub>2</sub>), 0.88 (t, *J* = 7.2 Hz, 3 H, CH<sub>3</sub>); <sup>13</sup>C NMR (100 MHz, CDCl<sub>3</sub>): δ = 212.6, 172.8, 135.0, 128.5, 127.6, 126.1, 105.2, 101.8, 30.2, 28.3, 22.2, 16.3, 13.8.

### (2) Preparation of (*S*)-2-butyl-4-(2-methylphenyl)-2,3-pentadienoic acid ((*S*)-2b) (wj-1-016-2)

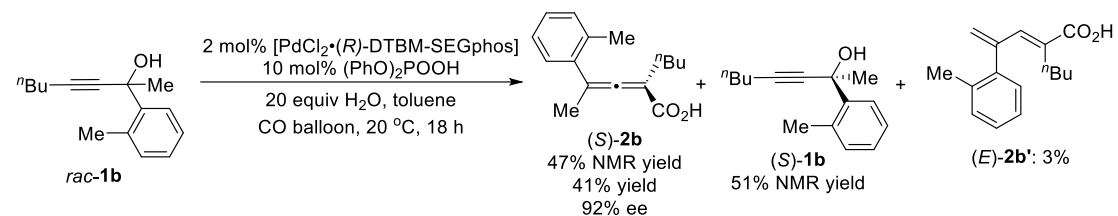

Following Typical Procedure II, the reaction of [PdCl<sub>2</sub>•(*R*)-DTBM-SEGphos] (13.4 mg, 0.01 mmol), and (PhO)<sub>2</sub>PO<sub>2</sub>H (12.6 mg, 0.05 mmol), *rac*-1b (108.1 mg, 0.5 mmol), and H<sub>2</sub>O (180 μL, d = 1.0 g/mL, 18.0 mg, 10 mmol) in toluene (2.5 mL) afforded the product (*S*)-2b (50.2 mg, 41%) (47% NMR yield of (*S*)-2b and 3% of (*E*)-2b' were

formed with 51% of (*S*)-**1b** remained based on <sup>1</sup>H NMR analysis of the crude product) [eluent: petroleum ether / ethyl ether / dichloromethane = 30/1/1 (480 mL), then petroleum ether / ethyl acetate = 10/1 (440 mL)]: 92% ee (HPLC conditions: AS-H column, hexane/<sup>i</sup>PrOH = 98/2, 1.0 mL/min, λ = 214 nm, *t*<sub>R</sub> (major) = 7.1 min, *t*<sub>R</sub> (minor) = 10.1 min); oil; <sup>1</sup>H NMR (400 MHz, CDCl<sub>3</sub>): δ = 7.29-7.23 (m, 1 H, Ar-H), 7.21-7.14 (m, 3 H, Ar-H), 2.40 (s, 3 H, CH<sub>3</sub>), 2.35-2.08 (m, 5 H, CH<sub>2</sub> and CH<sub>3</sub>), 1.52-1.41 (m, 2 H, CH<sub>2</sub>), 1.40-1.28 (m, 2 H, CH<sub>2</sub>), 0.90 (t, *J* = 7.4 Hz, 3 H, CH<sub>3</sub>); <sup>13</sup>C NMR (100 MHz, CDCl<sub>3</sub>): δ = 210.1, 173.4, 136.2, 136.0, 130.6, 127.9, 127.6, 125.9, 104.6, 98.9, 30.1, 28.1, 22.2, 20.3, 19.9, 13.8.

### (3) Preparation of (*S*)-2-butyl-4-(3-methylphenyl)-2,3-pentadienoic acid ((*S*)-**2c**) (wj-1-019-2)

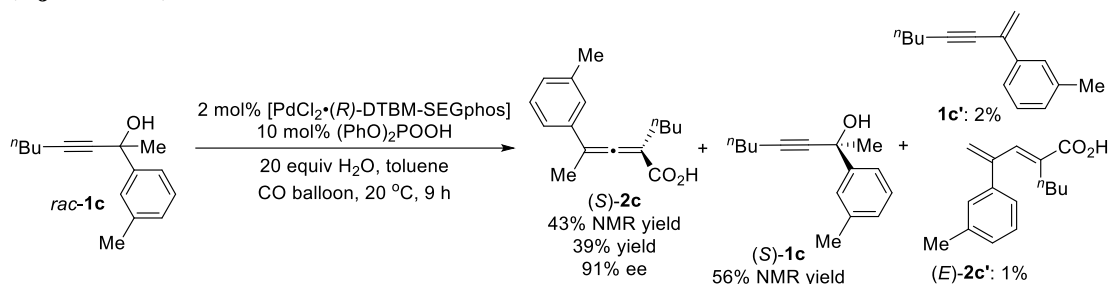

Following Typical Procedure II, the reaction of [PdCl<sub>2</sub>•(*R*)-DTBM-SEGphos] (13.7 mg, 0.01 mmol), (PhO)<sub>2</sub>PO<sub>2</sub>H (12.5 mg, 0.05 mmol), *rac*-**1c** (109.0 mg, 0.5 mmol), and H<sub>2</sub>O (180 μL, d = 1.0 g/mL, 180.0 mg, 10 mmol) in toluene (2.5 mL) afforded the product (*S*)-**2c** (48.5 mg, 39%) (43% NMR yield of (*S*)-**2c**, 2% of **1c'**, and 1% of (*E*)-**2c'** were formed with 56% of (*S*)-**1c** remained based on <sup>1</sup>H NMR analysis of the crude product) [eluent: petroleum ether / ethyl ether / dichloromethane = 30/1/1 (480 mL), then petroleum ether / ethyl acetate = 10/1 (440 mL)]: 91% ee (HPLC conditions: AS-H column, hexane/<sup>i</sup>PrOH = 98/2, 1.0 mL/min, λ = 214 nm, *t*<sub>R</sub> (major) = 7.3 min, *t*<sub>R</sub> (minor) = 9.3 min); solid; <sup>1</sup>H NMR (400 MHz, CDCl<sub>3</sub>): δ = 7.26-7.12 (m, 3 H, Ar-H), 7.06 (d, *J* = 7.2 Hz, 1 H, Ar-H), 2.40-2.26 (m, 5 H, CH<sub>2</sub> and CH<sub>3</sub>), 2.18 (s, 3 H, CH<sub>3</sub>), 1.53-1.41 (m, 2 H, CH<sub>2</sub>), 1.40-1.29 (m, 2 H, CH<sub>2</sub>), 0.88 (t, *J* = 7.2 Hz, 3 H, CH<sub>3</sub>); <sup>13</sup>C NMR (100 MHz, CDCl<sub>3</sub>): δ = 212.6, 172.8, 138.1, 134.9, 128.42, 128.38, 126.8, 123.2, 105.2, 101.6, 30.2, 28.3, 22.2, 21.4, 16.4, 13.8.

**(4) Preparation of (*S*)-2-butyl-4-(4-methylphenyl)-2,3-pentadienoic acid ((*S*)-2w) (wj-1-022-2)**

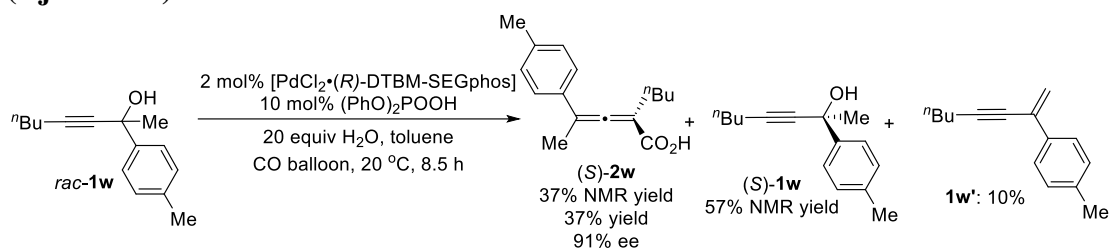

Following Typical Procedure II, the reaction of [PdCl<sub>2</sub>•(*R*)-DTBM-SEGphos] (13.5 mg, 0.01 mmol), (PhO)<sub>2</sub>PO<sub>2</sub>H (12.6 mg, 0.05 mmol), *rac*-**1w** (108.7 mg, 0.5 mmol), and H<sub>2</sub>O (180 μL, d = 1.0 g/mL, 180.0 mg, 10 mmol) in toluene (2.5 mL) afforded the product (*S*)-**2w** (45.7 mg, 37%) (37% NMR yield of (*S*)-**2w** and 10% of **1w'** were formed with 57% of (*S*)-**1w** remained based on <sup>1</sup>H NMR analysis of the crude product) [eluent: petroleum ether / ethyl ether / dichloromethane = 30/1/1 (480 mL), then petroleum ether / ethyl acetate = 10/1 (440 mL)]: 91% ee (HPLC conditions: AS-H column, hexane/<sup>i</sup>PrOH = 98/2, 1.0 mL/min, λ = 214 nm, *t*<sub>R</sub> (major) = 9.4 min, *t*<sub>R</sub> (minor) = 10.7 min); solid; <sup>1</sup>H NMR (400 MHz, CDCl<sub>3</sub>): δ = 7.27 (d, *J* = 8.0 Hz, 2 H, Ar-H), 7.14 (d, *J* = 7.6 Hz, 2 H, Ar-H), 2.37-2.25 (m, 5 H, CH<sub>2</sub> and CH<sub>3</sub>), 2.17 (s, 3 H, CH<sub>3</sub>), 1.50-1.40 (m, 2 H, CH<sub>2</sub>), 1.40-1.28 (m, 2 H, CH<sub>2</sub>), 0.87 (t, *J* = 7.2 Hz, 3 H, CH<sub>3</sub>); <sup>13</sup>C NMR (100 MHz, CDCl<sub>3</sub>): δ = 212.4, 172.6, 137.4, 132.0, 129.3, 126.0, 105.1, 101.6, 30.2, 28.4, 22.2, 21.1, 16.3, 13.8.

**(5) Preparation of (*S*)-2-butyl-4-(3-methoxyphenyl)-2,3-pentadienoic acid ((*S*)-2d) (wj-1-030-2)**

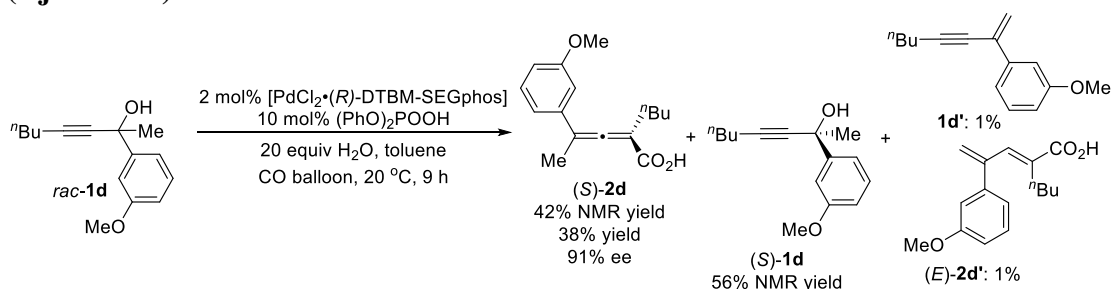

Following Typical Procedure II, the reaction of [PdCl<sub>2</sub>•(*R*)-DTBM-SEGphos] (13.7 mg, 0.01 mmol), (PhO)<sub>2</sub>PO<sub>2</sub>H (12.6 mg, 0.05 mmol), *rac*-**1d** (118.0 mg, 0.5 mmol), and H<sub>2</sub>O (180 μL, d = 1.0 g/mL, 180.0 mg, 10 mmol) in toluene (2.5 mL) afforded the product (*S*)-**2d** (50.6 mg, 38%) (42% NMR yield of (*S*)-**2d**, 1% of **1d'**, and 1% of (*E*)-

**2d'** were formed with 56% of (*S*)-**1d** remained based on <sup>1</sup>H NMR analysis of the crude product) [eluent: petroleum ether / ethyl ether / dichloromethane = 30/1/1 (480 mL), then petroleum ether / ethyl acetate = 10/1 (660 mL)]: 91% ee (HPLC conditions: AS-H column, hexane/<sup>i</sup>PrOH = 98/2, 1.0 mL/min, λ = 214 nm, *t*<sub>R</sub> (major) = 12.0 min, *t*<sub>R</sub> (minor) = 16.2 min); solid; <sup>1</sup>H NMR (400 MHz, CDCl<sub>3</sub>): δ = 7.26 (t, *J* = 8.0 Hz, 1 H, Ar-H), 6.98 (d, *J* = 8.0 Hz, 1 H, Ar-H), 6.92 (s, 1 H, Ar-H), 6.80 (dd, *J*<sub>1</sub> = 8.0 Hz, *J*<sub>2</sub> = 2.0 Hz, 1 H, Ar-H), 3.80 (s, 3 H, OCH<sub>3</sub>), 2.32 (t, *J* = 7.6 Hz, 2 H, CH<sub>2</sub>), 2.18 (s, 3 H, CH<sub>3</sub>), 1.51-1.40 (m, 2 H, CH<sub>2</sub>), 1.40-1.29 (m, 2 H, CH<sub>2</sub>), 0.88 (t, *J* = 7.2 Hz, 3 H, CH<sub>3</sub>); <sup>13</sup>C NMR (100 MHz, CDCl<sub>3</sub>): δ = 212.6, 172.5, 159.8, 136.6, 129.5, 118.6, 112.9, 112.0, 105.2, 101.8, 55.2, 30.2, 28.3, 22.3, 16.4, 13.8.

**(6) Preparation of (*S*)-2-butyl-4-(4-chlorophenyl)-2,3-pentadienoic acid ((*S*)-**2e**) (wj-1-025-2)**

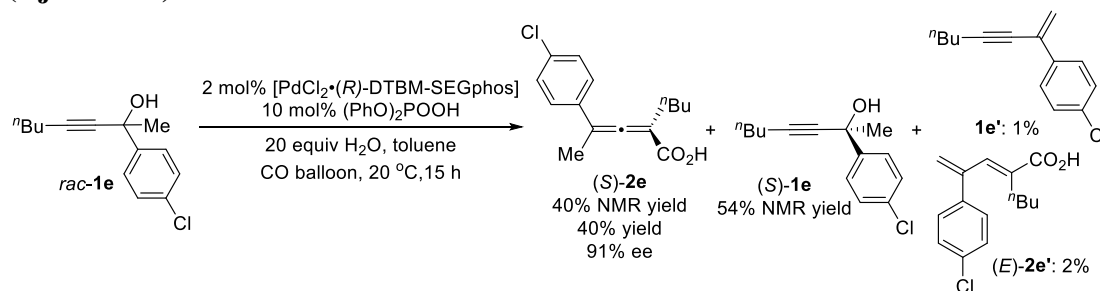

Following Typical Procedure II, the reaction of [PdCl<sub>2</sub>•(*R*)-DTBM-SEGphos] (13.5 mg, 0.01 mmol), (PhO)<sub>2</sub>PO<sub>2</sub>H (12.6 mg, 0.05 mmol), *rac*-**1e** (117.4 mg, 0.5 mmol), and H<sub>2</sub>O (180 μL, d = 1.0 g/mL, 180.0 mg, 10 mmol) in toluene (2.5 mL) afforded the product (*S*)-**2e** (53.1 mg, 40%) (40% NMR yield of (*S*)-**2e**, 1% of **1e'**, and 2% of (*E*)-**2e'** were formed with 54% of (*S*)-**1e** remained based on <sup>1</sup>H NMR analysis of the crude product) [eluent: petroleum ether / ethyl ether / dichloromethane = 30/1/1 (480mL), then petroleum ether / ethyl acetate = 10/1 (550 mL)]: 91% ee (HPLC conditions: AS-H column, hexane/<sup>i</sup>PrOH = 98/2, 1.0 mL/min, λ = 214 nm, *t*<sub>R</sub> (major) = 9.3 min, *t*<sub>R</sub> (minor) = 12.4 min); solid; <sup>1</sup>H NMR (400 MHz, CDCl<sub>3</sub>): δ = 7.30 (s, 4 H, Ar-H), 2.32 (t, *J* = 7.4 Hz, 2 H, CH<sub>2</sub>), 2.17 (s, 3 H, CH<sub>3</sub>), 1.50-1.40 (m, 2 H, CH<sub>2</sub>), 1.39-1.28 (m, 2 H, CH<sub>2</sub>), 0.88 (t, *J* = 7.2 Hz, 3 H, CH<sub>3</sub>); <sup>13</sup>C NMR (100 MHz, CDCl<sub>3</sub>): δ = 212.4, 172.2, 133.6, 133.4, 128.7, 127.3, 104.4, 102.1, 30.2, 28.3, 22.2, 16.3, 13.8.

**(7) Preparation of (S)-2-butyl-4-(4-bromophenyl)-2,3-pentadienoic acid ((S)-2f) (wj-1-031-2)**

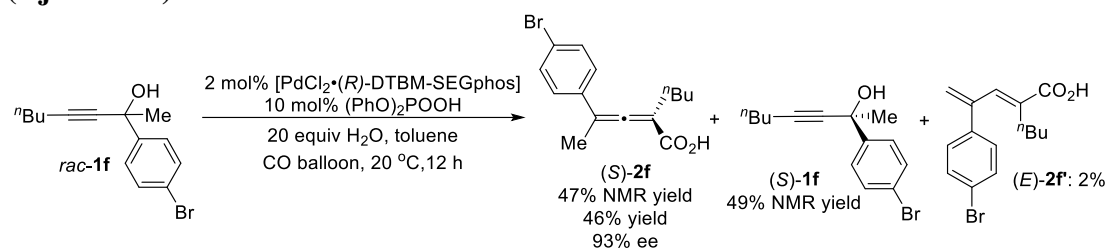

Following Typical Procedure II, the reaction of [PdCl<sub>2</sub>•(*R*)-DTBM-SEGphos] (13.6 mg, 0.01 mmol), (PhO)<sub>2</sub>PO<sub>2</sub>H (12.5 mg, 0.05 mmol), *rac*-**1f** (140.1 mg, 0.5 mmol), and H<sub>2</sub>O (180 μL, d = 1.0 g/mL, 180.0 mg, 10 mmol) in toluene (2.5 mL) afforded the product *(S)*-**2f** (70.9 mg, 46%) (47% NMR yield of *(S)*-**2f** and 2% of *(E)*-**2f** were formed with 49% of *(S)*-**1f** remained based on <sup>1</sup>H NMR analysis of the crude product) [eluent: petroleum ether / ethyl ether / dichloromethane = 30/1/1 (480 mL), petroleum ether / ethyl acetate = 10/1 (440 mL)]: 93% ee (HPLC conditions: AS-H column, hexane/<sup>i</sup>PrOH = 98/2, 1.0 mL/min, λ = 214 nm, *t*<sub>R</sub> (major) = 10.5 min, *t*<sub>R</sub> (minor) = 15.0 min); solid; <sup>1</sup>H NMR (400 MHz, CDCl<sub>3</sub>): δ = 7.46 (d, *J* = 8.4 Hz, 2 H, Ar-H), 7.24 (d, *J* = 8.4 Hz, 2 H, Ar-H), 2.32 (t, *J* = 7.4 Hz, 2 H, CH<sub>2</sub>), 2.17 (s, 3 H, CH<sub>3</sub>), 1.50-1.40 (m, 2 H, CH<sub>2</sub>), 1.39-1.28 (m, 2 H, CH<sub>2</sub>), 0.88 (t, *J* = 7.2 Hz, 3 H, CH<sub>3</sub>); <sup>13</sup>C NMR (100 MHz, CDCl<sub>3</sub>): δ = 212.3, 171.9, 134.1, 131.7, 127.6, 121.6, 104.5, 102.1, 30.2, 28.3, 22.2, 16.3, 13.8.

**(8) Preparation of (S)-2-butyl-4-(4-(methoxycarbonyl)phenyl)-2,3-pentadienoic acid ((S)-2g) (wj-1-032-2)**

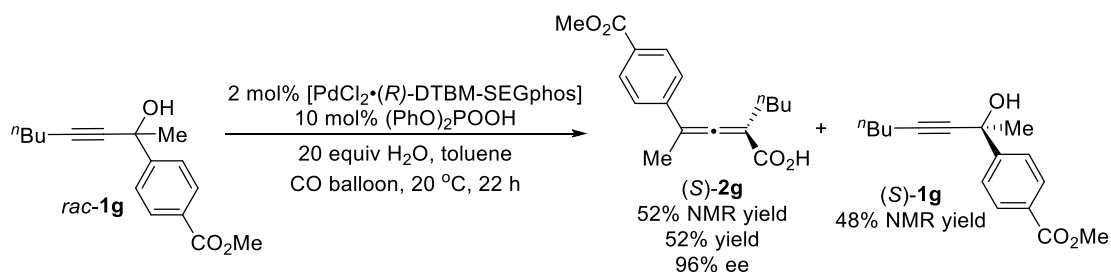

Following Typical Procedure II, the reaction of [PdCl<sub>2</sub>•(*R*)-DTBM-SEGphos] (13.5 mg, 0.01 mmol), (PhO)<sub>2</sub>PO<sub>2</sub>H (12.5 mg, 0.05 mmol), *rac*-**1g** (130.0 mg, 0.5 mmol), and H<sub>2</sub>O (180 μL, d = 1.0 g/mL, 180.0 mg, 10 mmol) in toluene (2.5 mL) afforded the product *(S)*-**2g** (74.6 mg, 52%) (52% NMR yield of *(S)*-**2g** was formed with 48% of

(*S*)-**1g** remained based on  $^1\text{H}$  NMR analysis of the crude product) [eluent: petroleum ether / ethyl ether / dichloromethane = 30/1/1 (480 mL), then petroleum ether / ethyl acetate = 20/1 (840 mL), 10/1(550 mL)]: 96% ee (HPLC conditions: AS-H column, hexane/ $^i$ PrOH = 95/5, 1.0 mL/min,  $\lambda$  = 214 nm,  $t_{\text{R}}$  (major) = 13.9 min,  $t_{\text{R}}$  (minor) = 17.4 min); solid;  $^1\text{H}$  NMR (400 MHz,  $\text{CDCl}_3$ ):  $\delta$  = 8.00 (d,  $J$  = 8.4 Hz, 2 H, Ar-H), 7.44 (d,  $J$  = 8.0 Hz, 2 H, Ar-H), 3.92 (s, 3 H,  $\text{OCH}_3$ ), 2.34 (t,  $J$  = 7.4 Hz, 2 H,  $\text{CH}_2$ ), 2.21 (s, 3 H,  $\text{CH}_3$ ), 1.52-1.41 (m, 2 H,  $\text{CH}_2$ ), 1.40-1.28 (m, 2 H,  $\text{CH}_2$ ), 0.88 (t,  $J$  = 7.2 Hz, 3 H,  $\text{CH}_3$ );  $^{13}\text{C}$  NMR (100 MHz,  $\text{CDCl}_3$ ):  $\delta$  = 213.1, 172.3, 166.8, 139.9, 129.8, 129.0, 125.9, 104.8, 102.3, 52.1, 30.1, 28.2, 22.2, 16.2, 13.8.

**(9) Preparation of (*S*)-2-butyl-4-(2-naphthyl)-2,3-pentadienoic acid ((*S*)-**2h**) (wj-1-047-2)**

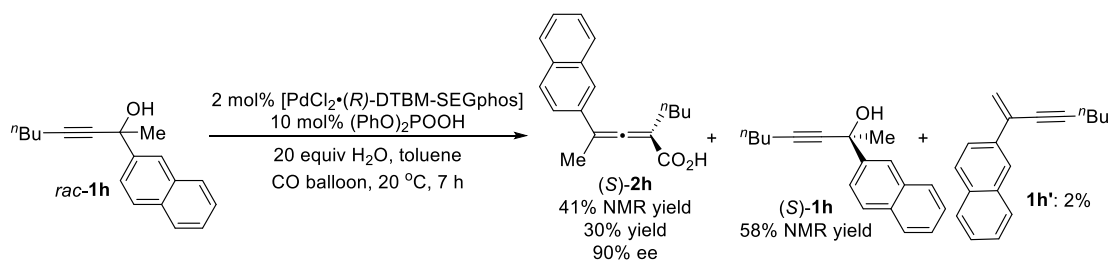

Following Typical Procedure II, the reaction of  $[\text{PdCl}_2 \cdot (\text{R})\text{-DTBM-SEGphos}]$  (13.5 mg, 0.01 mmol),  $(\text{PhO})_2\text{PO}_2\text{H}$  (12.5 mg, 0.05 mmol), *rac*-**1h** (127.0 mg, 0.5 mmol), and  $\text{H}_2\text{O}$  (180  $\mu\text{L}$ ,  $d$  = 1.0 g/mL, 180.0 mg, 10 mmol) in toluene (2.5 mL) afforded the product (*S*)-**2h** (42.5 mg, 30%) (41% NMR yield of (*S*)-**2h** and 2% of **1h'** were formed with 58% of (*S*)-**1h** remained based on  $^1\text{H}$  NMR analysis of the crude product) [eluent: petroleum ether / ethyl ether / dichloromethane = 30/1/1 (480 mL), petroleum ether / ethyl acetate = 10/1 (660 mL)]: 90% ee (HPLC conditions: AS-H column, hexane/ $^i$ PrOH = 95/5, 1.0 mL/min,  $\lambda$  = 214 nm,  $t_{\text{R}}$  (major) = 6.0 min,  $t_{\text{R}}$  (minor) = 7.3 min); solid;  $^1\text{H}$  NMR (400 MHz,  $\text{CDCl}_3$ ):  $\delta$  = 7.86-7.64 (m, 4 H, Ar-H), 7.55-7.34 (m, 3 H, Ar-H), 2.37 (t,  $J$  = 7.4 Hz, 2 H,  $\text{CH}_2$ ), 2.30 (s, 3 H,  $\text{CH}_3$ ), 1.56-1.44 (m, 2 H,  $\text{CH}_2$ ), 1.43-1.31 (m, 2 H,  $\text{CH}_2$ ), 0.88 (t,  $J$  = 7.2 Hz, 3 H,  $\text{CH}_3$ );  $^{13}\text{C}$  NMR (100 MHz,  $\text{CDCl}_3$ ):  $\delta$  = 213.2, 172.7, 133.5, 132.8, 132.4, 128.09, 128.06, 127.6, 126.3, 126.1, 124.8, 124.2, 105.5, 102.1, 30.2, 28.4, 22.3, 16.3, 13.8.



**(10) Preparation of (*S*)-2-butyl-4-(thiophen-3-yl)-2,3-pentadienoic acid ((*S*)-2x) (wj-1-036-2)**

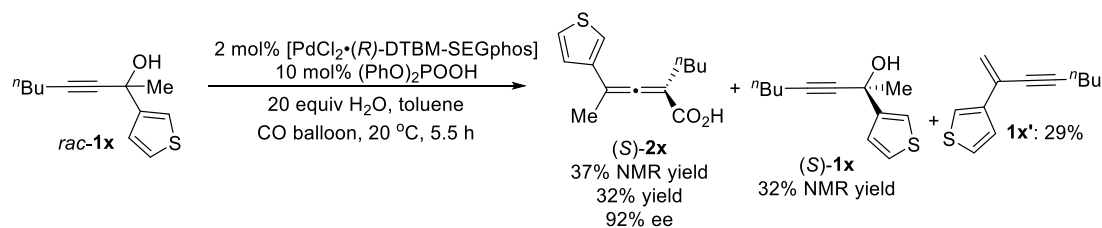

Following Typical Procedure II, the reaction of [PdCl<sub>2</sub>·(*R*)-DTBM-SEGphos] (13.7 mg, 0.01 mmol), (PhO)<sub>2</sub>PO<sub>2</sub>H (12.4 mg, 0.05 mmol), *rac*-1x (104.5 mg, 0.5 mmol), and H<sub>2</sub>O (180 μL, d = 1.0 g/mL, 180.0 mg, 10 mmol) in toluene (2.5 mL) afforded the product (*S*)-2x (37.6 mg, 32%) (37% NMR yield of (*S*)-2x and 29% of 1x' were formed with 32% of (*S*)-1x remained based on <sup>1</sup>H NMR analysis of the crude product) [eluent: petroleum ether / ethyl ether / dichloromethane = 30/1/1 (480 mL), then petroleum ether / ethyl acetate = 10/1 (440 mL)]: 92% ee (HPLC conditions: AS-H column, hexane/<sup>i</sup>PrOH = 98/2, 1.0 mL/min, λ = 214 nm, *t*<sub>R</sub> (major) = 11.7 min, *t*<sub>R</sub> (minor) = 16.3 min); solid; <sup>1</sup>H NMR (400 MHz, CDCl<sub>3</sub>): δ = 7.31-7.22 (m, 1 H, one proton of thienyl), 7.18-7.12 (m, 1 H, one proton of thienyl), 7.04 (d, *J* = 4.8 Hz, 1 H, one proton of thienyl), 2.31 (t, *J* = 7.6 Hz, 2 H, CH<sub>2</sub>), 2.17 (s, 3 H, CH<sub>3</sub>), 1.53-1.41 (m, 2 H, CH<sub>2</sub>), 1.40-1.30 (m, 2 H, CH<sub>2</sub>), 0.88 (t, *J* = 7.2 Hz, 3 H, CH<sub>3</sub>); <sup>13</sup>C NMR (100 MHz, CDCl<sub>3</sub>): δ = 212.8, 172.3, 136.6, 126.3, 125.9, 120.6, 101.4, 101.3, 30.3, 28.4, 22.2, 16.7, 13.8.

**(11) Preparation of (*S*)-2-butyl-4-cyclohexyl-2,3-pentadienoic acid ((*S*)-2i) (wj-1-050-2)**

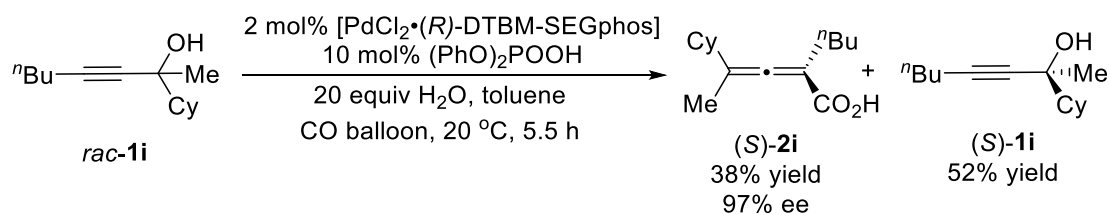

Following Typical Procedure II, the reaction of [PdCl<sub>2</sub>·(*R*)-DTBM-SEGphos] (13.7 mg, 0.01 mmol), (PhO)<sub>2</sub>PO<sub>2</sub>H (12.4 mg, 0.05 mmol), *rac*-1i (104.5 mg, 0.5 mmol), and H<sub>2</sub>O (180 μL, d = 1.0 g/mL, 180.0 mg, 10 mmol) in toluene (2.5 mL) afforded the product (*S*)-2i (45.6 mg, 38%) [eluent: petroleum ether / diethyl ether / dichloromethane

= 30/1/1 (480 mL), then petroleum ether / ethyl acetate = 10/1 (330 mL)]; 97% ee (HPLC conditions: AS-H column, hexane/<sup>i</sup>PrOH = 98/2, 1.0 mL/min, λ = 214 nm, *t<sub>R</sub>* (major) = 5.4 min, *t<sub>R</sub>* (minor) = 7.2 min); oil; <sup>1</sup>H NMR (400 MHz, CDCl<sub>3</sub>): δ = 2.27-2.10 (m, 2 H, CH<sub>2</sub>), 1.92-1.81 (m, 2 H, CH<sub>2</sub>), 1.81-1.70 (m, 5 H, CH<sub>2</sub> and CH<sub>3</sub>), 1.70-1.61 (m, 1 H, CH), 1.47-1.03 (m, 10 H, 5 x CH<sub>2</sub>), 0.90 (t, *J* = 7.0 Hz, 3 H, CH<sub>3</sub>); <sup>13</sup>C NMR (100 MHz, CDCl<sub>3</sub>): δ = 208.6, 174.0, 109.3, 99.9, 41.8, 31.8, 31.6, 30.4, 28.1, 26.32, 26.26, 26.2, 22.3, 16.4, 13.9.

**(12) Preparation of (*S*)-2-butyl-4,5,5-trimethyl-2,3-hexadienoic acid ((*S*)-2j) (wj-1-055-2)**

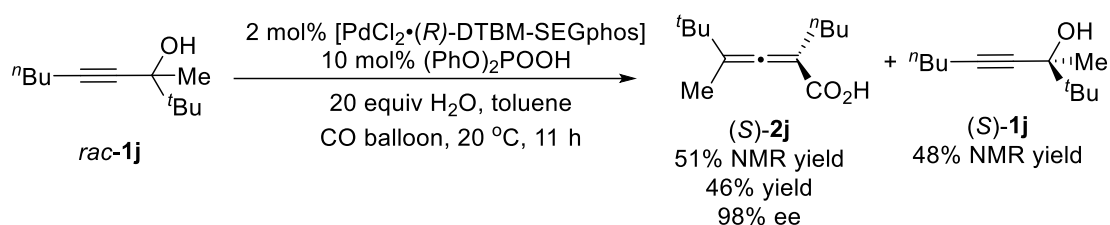

Following Typical Procedure II, the reaction of [PdCl<sub>2</sub>·(*R*)-DTBM-SEGphos] (13.6 mg, 0.01 mmol), (PhO)<sub>2</sub>PO<sub>2</sub>H (12.5 mg, 0.05 mmol), *rac*-**1j** (92.4 mg, 0.5 mmol), and H<sub>2</sub>O (180 μL, d = 1.0 g/mL, 180.0 mg, 10 mmol) in toluene (2.5 mL) afforded the product (*S*)-**2j** (48.6 mg, 46%) (51% NMR yield of (*S*)-**2j** with 48% of (*S*)-**1j** remained based on <sup>1</sup>H NMR analysis of the crude product) [eluent: petroleum ether / ethyl ether / dichloromethane = 30/1/1 (320 mL), then petroleum ether / ethyl acetate = 10/1 (330 mL)]; 98% ee (HPLC conditions: AD-H column, hexane/<sup>i</sup>PrOH = 98/2, 1.0 mL/min, λ = 214 nm, *t<sub>R</sub>* (minor) = 7.0 min, *t<sub>R</sub>* (major) = 7.5 min); solid; <sup>1</sup>H NMR (400 MHz, CDCl<sub>3</sub>): δ = 2.25-2.10 (m, 2 H, CH<sub>2</sub>), 1.77 (s, 3 H, CH<sub>3</sub>), 1.48-1.29 (m, 4 H, 2 x CH<sub>2</sub>), 1.10 (s, 9 H, 3 x CH<sub>3</sub>), 0.90 (t, *J* = 7.0 Hz, 3 H, CH<sub>3</sub>); <sup>13</sup>C NMR (100 MHz, CDCl<sub>3</sub>): δ = 208.1, 174.2, 112.9, 99.5, 34.2, 30.4, 28.8, 28.0, 22.3, 14.0, 13.9.

**(13) Preparation of (*S*)-2-pentyl-4-phenyl-2,3-pentadienoic acid ((*S*)-2k) (wj-1-046-2)**

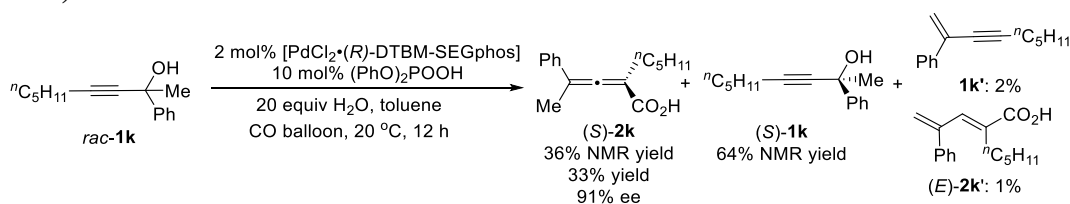

Following Typical Procedure II, the reaction of [PdCl<sub>2</sub>•(*R*)-DTBM-SEGphos] (13.6 mg, 0.01 mmol), (PhO)<sub>2</sub>PO<sub>2</sub>H (12.5 mg, 0.05 mmol), *rac*-**1k** (107.4 mg, 0.5 mmol), and H<sub>2</sub>O (180 μL, d = 1.0 g/mL, 180.0 mg, 10 mmol) in toluene (2.5 mL) afforded the product (*S*)-**2k** (40.6 mg, 33%) (36% NMR yield of (*S*)-**2k**, 2% of **1k'**, and 1% of (*E*)-**2k'** were formed with 64% of (*S*)-**1k** remained based on <sup>1</sup>H NMR analysis of the crude product) [eluent: petroleum ether / ethyl ether / dichloromethane = 30/1/1 (480 mL), then petroleum ether / ethyl acetate = 10/1 (440 mL)]: 91% ee (HPLC conditions: AS-H column, hexane/<sup>*i*</sup>PrOH = 98/2, 1.0 mL/min, λ = 214 nm, *t*<sub>R</sub> (major) = 7.8 min, *t*<sub>R</sub> (minor) = 12.4 min); solid; <sup>1</sup>H NMR (400 MHz, CDCl<sub>3</sub>): δ = 7.43-7.30 (m, 4 H, Ar-H), 7.29-7.23 (m, 1 H, Ar-H), 2.32 (t, *J* = 7.6 Hz, 2 H, CH<sub>2</sub>), 2.20 (s, 3 H, CH<sub>3</sub>), 1.54-1.42 (m, 2 H, CH<sub>2</sub>), 1.35-1.22 (m, 4 H, 2 x CH<sub>2</sub>), 0.84 (t, *J* = 6.8 Hz, 3 H, CH<sub>3</sub>); <sup>13</sup>C NMR (100 MHz, CDCl<sub>3</sub>): δ = 212.6, 172.7, 135.1, 128.5, 127.6, 126.1, 105.2, 101.8, 31.3, 28.6, 27.7, 22.4, 16.3, 14.0.

**(14) Preparation of (*S*)-2-hexyl-4-phenyl-2,3-pentadienoic acid ((*S*)-**2l**) (wj-1-094-2)**

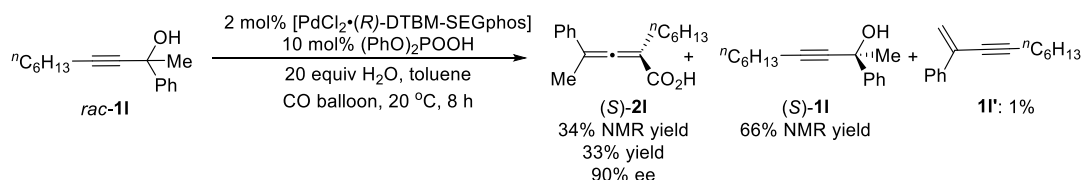

Following Typical Procedure II, the reaction of [PdCl<sub>2</sub>•(*R*)-DTBM-SEGphos] (13.7 mg, 0.01 mmol), (PhO)<sub>2</sub>PO<sub>2</sub>H (12.6 mg, 0.05 mmol), *rac*-**1l** (115.0 mg, 0.5 mmol), and H<sub>2</sub>O (180 μL, d = 1.0 g/mL, 180.0 mg, 10 mmol) in toluene (2.5 mL) afforded the product (*S*)-**2l** (42.0 mg, 33%) (34% NMR yield of (*S*)-**2l** and 1% of **1l'** were formed with 66% of (*S*)-**1l** remained based on <sup>1</sup>H NMR analysis of the crude product) [eluent: petroleum ether / ethyl ether / dichloromethane = 30/1/1 (448 mL), then petroleum ether / ethyl acetate = 10/1 (660 mL)]: 90% ee (HPLC conditions: AS-H column, hexane/<sup>*i*</sup>PrOH = 98/2, 1.0 mL/min, λ = 214 nm, *t*<sub>R</sub> (major) = 7.5 min, *t*<sub>R</sub> (minor) = 13.4 min); solid; <sup>1</sup>H NMR (400 MHz, CDCl<sub>3</sub>): δ = 7.44-7.29 (m, 4 H, Ar-H), 7.28-7.22 (m, 1 H, Ar-H), 2.32 (t, *J* = 7.4 Hz, 2 H, CH<sub>2</sub>), 2.19 (s, 3 H, CH<sub>3</sub>), 1.55-1.41 (m, 2 H, CH<sub>2</sub>), 1.37-1.18 (m, 6 H, 3 x CH<sub>2</sub>), 0.84 (t, *J* = 6.6 Hz, 3 H, CH<sub>3</sub>); <sup>13</sup>C NMR (100 MHz,

CDCl<sub>3</sub>):  $\delta$  = 212.5, 172.5, 135.0, 128.5, 127.6, 126.1, 105.2, 101.8, 31.6, 28.8, 28.6, 28.0, 22.6, 16.3, 14.0.

**(15) Preparation of (*S*)-2-heptyl-4-(2-methylphenyl)-2,3-pentadienoic acid ((*S*)-2m)  
(wj-1-070-2)**

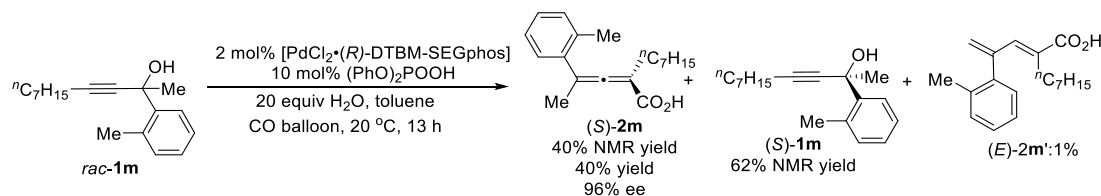

Following Typical Procedure II, the reaction of [PdCl<sub>2</sub>•(*R*)-DTBM-SEGphos] (13.5 mg, 0.01 mmol), (PhO)<sub>2</sub>PO<sub>2</sub>H (12.4 mg, 0.05 mmol), *rac*-1m (129.6 mg, 0.5 mmol), and H<sub>2</sub>O (180  $\mu$ L, *d* = 1.0 g/mL, 180.0 mg, 10 mmol) in toluene (2.5 mL) afforded the product (*S*)-2m (56.9 mg, 40%) (40% NMR yield of (*S*)-2m and 2% of (*E*)-2m' were formed with 62% of (*S*)-1m remained based on <sup>1</sup>H NMR analysis of the crude product) [eluent: petroleum ether / ethyl ether / dichloromethane = 30/1/1 (~420 mL), then petroleum ether / ethyl acetate = 8/1 (360 mL)]: 96% ee (HPLC conditions: AS-H column, hexane/<sup>i</sup>PrOH = 98/2, 1.0 mL/min,  $\lambda$  = 214 nm, *t*<sub>R</sub> (major) = 6.2 min, *t*<sub>R</sub> (minor) = 10.3 min); oil; <sup>1</sup>H NMR (400 MHz, CDCl<sub>3</sub>):  $\delta$  = 7.29-7.22 (m, 1 H, Ar-H), 7.21-7.10 (m, 3 H, Ar-H), 2.40 (s, 3 H, CH<sub>3</sub>), 2.34-2.15 (m, 2 H, CH<sub>2</sub>), 2.13 (s, 3 H, CH<sub>3</sub>), 1.54-1.40 (m, 2 H, CH<sub>2</sub>), 1.35-1.15 (m, 8 H, 4 x CH<sub>2</sub>), 0.87 (t, *J* = 6.8 Hz, 3 H, CH<sub>3</sub>); <sup>13</sup>C NMR (100 MHz, CDCl<sub>3</sub>):  $\delta$  = 210.2, 173.5, 136.3, 136.0, 130.6, 127.9, 127.6, 126.0, 104.6, 98.9, 31.8, 29.11, 29.06, 28.4, 28.0, 22.6, 20.3, 19.9, 14.1.

**(16) Preparation of (*S*)-2-octyl-4-(4-chlorophenyl)-2,3-pentadienoic acid ((*S*)-2n)  
(wj-1-074-2)**

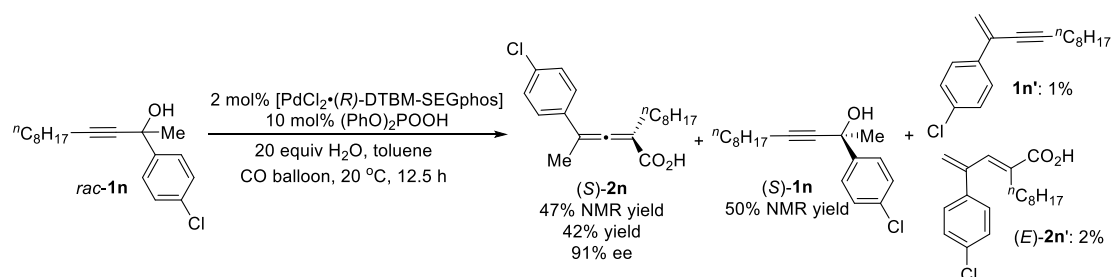

Following Typical Procedure II, the reaction of [PdCl<sub>2</sub>•(*R*)-DTBM-SEGphos]

(13.6 mg, 0.01 mmol), (PhO)<sub>2</sub>PO<sub>2</sub>H (12.4 mg, 0.05 mmol), *rac*-**1n** (146.1 mg, 0.5 mmol), and H<sub>2</sub>O (180 μL, d = 1.0 g/mL, 180.0 mg, 10 mmol) in toluene (2.5 mL) afforded the product (*S*)-**2n** (68.0 mg, 42%) (47% NMR yield of (*S*)-**2n**, 1% of **1n'**, and 2% of (*E*)-**2n'** were formed with 50% of (*S*)-**1n** remained based on <sup>1</sup>H NMR analysis of the crude product) [eluent: petroleum ether / ethyl ether / dichloromethane = 30/1/1 (480 mL), then petroleum ether / ethyl acetate = 8/1 (630 mL)]: 91% ee (HPLC conditions: AS-H column, hexane/*i*PrOH = 98/2, 1.0 mL/min, λ = 214 nm, *t*<sub>R</sub> (major) = 6.4 min, *t*<sub>R</sub> (minor) = 9.8 min); solid; <sup>1</sup>H NMR (400 MHz, CDCl<sub>3</sub>): δ = 7.30 (s, 4 H, Ar-H), 2.31 (t, *J* = 7.4 Hz, 2 H, CH<sub>2</sub>), 2.16 (s, 3 H, CH<sub>3</sub>), 1.53-1.40 (m, 2 H, CH<sub>2</sub>), 1.34-1.17 (m, 10 H, 5 x CH<sub>2</sub>), 0.86 (t, *J* = 7.0 Hz, 3 H, CH<sub>3</sub>); <sup>13</sup>C NMR (100 MHz, CDCl<sub>3</sub>): δ = 212.5, 172.5, 133.6, 133.4, 128.7, 127.3, 104.4, 102.1, 31.8, 29.3, 29.2, 29.1, 28.5, 28.0, 22.6, 16.3, 14.0.

**(17) Preparation of (*S*)-2-(3-methylbutyl)-4-phenyl-2,3-pentadienoic acid ((*S*)-**2o**) (wj-1-066-2)**

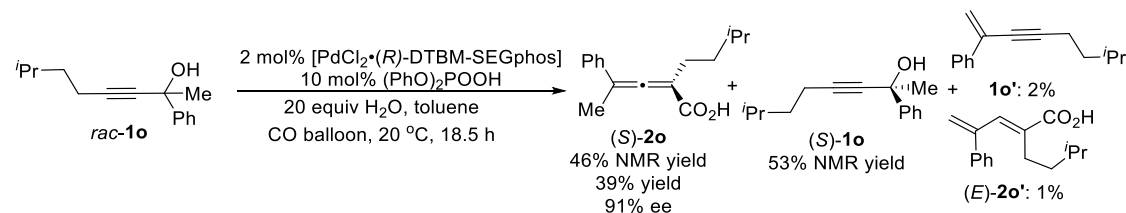

Following Typical Procedure II, the reaction of [PdCl<sub>2</sub>•(*R*)-DTBM-SEGphos] (13.7 mg, 0.01 mmol), (PhO)<sub>2</sub>PO<sub>2</sub>H (12.6 mg, 0.05 mmol), *rac*-**1o** (107.9 mg, 0.5 mmol), and H<sub>2</sub>O (180 μL, d = 1.0 g/mL, 180.0 mg, 10 mmol) in toluene (2.5 mL) afforded the product (*S*)-**2o** (47.3 mg, 39%) (46% NMR yield of (*S*)-**2o**, 2% of **1o'**, and 1% of (*E*)-**2o'** were formed with 53% of (*S*)-**1o** remained based on <sup>1</sup>H NMR analysis of the crude product) [eluent: petroleum ether / ethyl ether / dichloromethane = 30/1/1 (384 mL), then petroleum ether / ethyl acetate = 10/1 (660 mL)]: 91% ee (HPLC conditions: AS-H column, hexane/*i*PrOH = 98/2, 1.0 mL/min, λ = 214 nm, *t*<sub>R</sub> (major) = 7.8 min, *t*<sub>R</sub> (minor) = 11.0 min); solid; <sup>1</sup>H NMR (400 MHz, CDCl<sub>3</sub>): δ = 7.42-7.29 (m, 4 H, Ar-H), 7.29-7.21 (m, 1 H, Ar-H), 2.33 (t, *J* = 7.8 Hz, 2 H, CH<sub>3</sub>), 2.19 (s, 3 H, CH<sub>3</sub>), 1.65-1.52 (m, 1 H, CH), 1.40-1.31 (m, 2 H, CH<sub>2</sub>), 0.87 (t, *J* = 6.0 Hz, 6 H, 2 x CH<sub>3</sub>);

$^{13}\text{C}$  NMR (100 MHz,  $\text{CDCl}_3$ ):  $\delta = 212.5, 172.8, 135.0, 128.5, 127.6, 126.1, 105.2, 102.0, 37.1, 27.6, 26.6, 22.44, 22.40, 16.3$ .

**(18) Preparation of (*S*)-2-(4-chlorobutyl)-4-phenyl-2,3-pentadienoic acid ((*S*)-2p) (wj-1-064-2)**

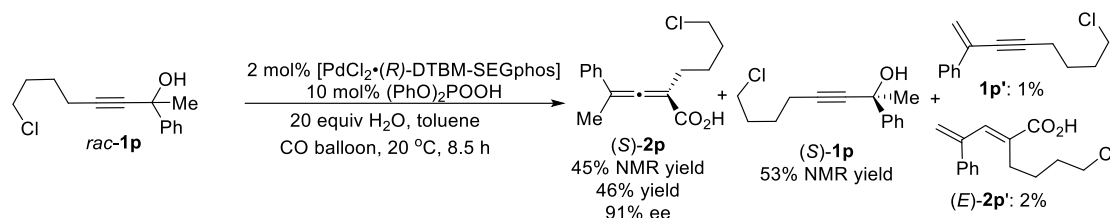

Following Typical Procedure II, the reaction of  $[\text{PdCl}_2 \cdot (\text{R})\text{-DTBM-SEGphos}]$  (13.6 mg, 0.01 mmol),  $(\text{PhO})_2\text{PO}_2\text{H}$  (12.4 mg, 0.05 mmol), *rac*-1p (117.7 mg, 0.5 mmol), and  $\text{H}_2\text{O}$  (180  $\mu\text{L}$ ,  $d = 1.0$  g/mL, 180.0 mg, 10 mmol) in toluene (2.5 mL) afforded the product (*S*)-2p (60.2 mg, 46%) (45% NMR yield of (*S*)-2p, 1% of 1p', and 2% of (*E*)-2p' were formed with 53% of (*S*)-1p remained based on  $^1\text{H}$  NMR analysis of the crude product) [eluent: petroleum ether / ethyl ether / dichloromethane = 30/1/1 (960 mL), then petroleum ether / ethyl acetate = 8/1 (900 mL)]: 91% ee (HPLC conditions: AS-H column, hexane/*i*PrOH = 95/5, 1.0 mL/min,  $\lambda = 214$  nm,  $t_R$  (major) = 8.0 min,  $t_R$  (minor) = 10.7 min); solid;  $^1\text{H}$  NMR (400 MHz,  $\text{CDCl}_3$ ):  $\delta = 7.49\text{-}7.30$  (m, 4 H, Ar-H), 7.30-7.22 (m, 1 H, Ar-H), 3.50 (t,  $J = 6.6$  Hz, 2 H,  $\text{CH}_2$ ), 2.36 (t,  $J = 7.4$  Hz, 2 H,  $\text{CH}_2$ ), 2.20 (s, 3 H,  $\text{CH}_3$ ), 1.88-1.75 (m, 2 H,  $\text{CH}_2$ ), 1.70-1.58 (m, 2 H,  $\text{CH}_2$ );  $^{13}\text{C}$  NMR (100 MHz,  $\text{CDCl}_3$ ):  $\delta = 212.5, 172.5, 134.7, 128.6, 127.8, 126.1, 105.7, 101.1, 44.6, 32.0, 27.8, 25.3, 16.3$ .

**(19) Preparation of (*S*)-2-phenethyl-4-phenyl-2,3-pentadienoic acid ((*S*)-2q) (wj-1-056-2)**

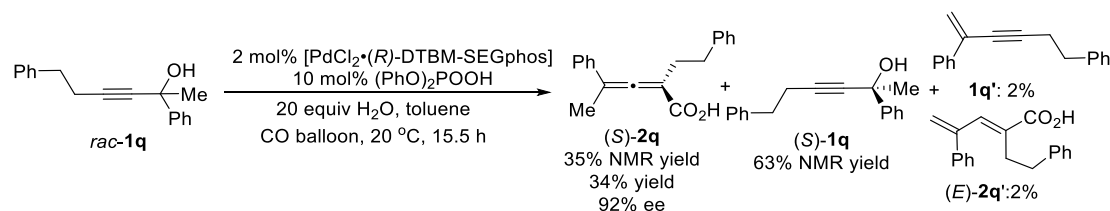

Following Typical Procedure II, the reaction of  $[\text{PdCl}_2 \cdot (\text{R})\text{-DTBM-SEGphos}]$  (13.7 mg, 0.01 mmol),  $(\text{PhO})_2\text{PO}_2\text{H}$  (12.5 mg, 0.05 mmol), *rac*-1q (125.1 mg, 0.5

mmol), and H<sub>2</sub>O (180 μL, d = 1.0 g/mL, 180.0 mg, 10 mmol) in toluene (2.5 mL) afforded the product (*S*)-**2q** (47.5 mg, 34%) (35% NMR yield of (*S*)-**2q**, 2% of **1q'**, and 2% of (*E*)-**2p'** were formed with 63% of (*S*)-**1q** remained based on <sup>1</sup>H NMR analysis of the crude product) [eluent: petroleum ether / ethyl ether / dichloromethane = 22/1/1 (480 mL), then petroleum ether / ethyl acetate = 8/1 (450 mL)]: 92% ee (HPLC conditions: AS-H column, hexane/<sup>i</sup>PrOH = 98/2, 1.0 mL/min, λ = 214 nm, *t*<sub>R</sub> (major) = 14.3 min, *t*<sub>R</sub> (minor) = 24.7 min); solid; <sup>1</sup>H NMR (400 MHz, CDCl<sub>3</sub>): δ = 7.35-7.19 (m, 7 H, Ar-H), 7.19-7.11 (m, 3 H, Ar-H), 2.83 (t, *J* = 7.4 Hz, 2 H, CH<sub>3</sub>), 2.75-2.60 (m, 2 H, CH<sub>2</sub>), 2.02 (s, 3 H, CH<sub>3</sub>); <sup>13</sup>C NMR (100 MHz, CDCl<sub>3</sub>): δ = 212.9, 172.5, 141.1, 134.7, 128.5, 128.3, 127.6, 126.1, 125.9, 105.6, 100.7, 34.1, 30.3, 16.1.

**(20) Preparation of (*S*)-2-(3-cyanopropyl)-4-phenyl-2,3-pentadienoic acid ((*S*)-**2r**) (wj-1-073-2)**

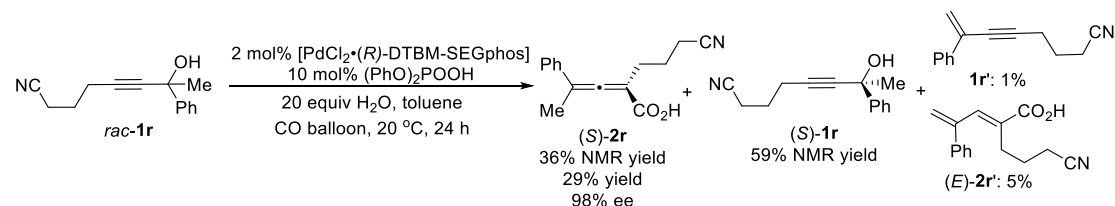

To a Schlenk flask (25 mL) were added [PdCl<sub>2</sub>•(*R*)-DTBM-SEGphos] (13.6 mg, 0.01 mmol) and (PhO)<sub>2</sub>PO<sub>2</sub>H (12.5 mg, 0.05 mmol). After addition, the flask was degassed and refilled with Ar for three times to ensure the complete exclusion of air. Then *rac*-**1r** (106.4 mg, 0.5 mmol)/toluene (1.5 mL) and H<sub>2</sub>O (180 μL, d = 1.0 g/mL, 180.0 mg, 10 mmol)/toluene (1.0 mL) were added sequentially. After that, the Ar gas line was closed. The resulting mixture was then frozen with a liquid nitrogen bath, degassed to remove the argon inside completely, and refilled with CO by a balloon of CO (about 1 L) for three times. Then the liquid nitrogen bath was removed and the resulting mixture was allowed to stand until completely thawed, vigorously stirred at 20 °C with a balloon of CO for 24 h, warmed up to room temperature. And the crude product treated with H<sub>2</sub>O<sub>2</sub> (20 μL, d = 1.13 g/mL, 30 wt. % in H<sub>2</sub>O) for 30 min before stopping the reaction, diluted with 5 mL of ethyl acetate, filtered through a short column silica gel (3 cm) eluted with ethyl acetate (20 mL), and concentrated. The crude product

was analyzed by  $^1\text{H}$  NMR with  $\text{CH}_2\text{Br}_2$  (35  $\mu\text{L}$ , 2.477 g/mL, 0.5 mmol) as the internal standard: 36% NMR yield of (*S*)-**2r**, 1% of **1r'**, and 5% of (*E*)-**2r'** were formed with 59% of (*S*)-**1r** remained. The residue was purified by chromatography on silica gel to afford the product (*S*)-**2r** (35.8 mg, 29%, purity: 97%) [eluent: petroleum ether / ethyl acetate = 6/1 (490 mL), 5/1 (1080 mL)]: 98% ee (HPLC conditions: AS-H column, hexane/*i*PrOH = 90/10, 1.0 mL/min,  $\lambda$  = 214 nm,  $t_{\text{R}}$  (major) = 13.9 min,  $t_{\text{R}}$  (minor) = 16.7 min); solid;  $^1\text{H}$  NMR (400 MHz,  $\text{CDCl}_3$ ):  $\delta$  = 7.41-7.23 (m, 5 H, Ar-H), 2.48 (t,  $J$  = 7.4 Hz, 2 H,  $\text{CH}_2$ ), 2.35 (t,  $J$  = 7.2 Hz, 2 H,  $\text{CH}_2$ ), 2.22 (s, 3 H,  $\text{CH}_3$ ), 1.86 (quint,  $J$  = 7.3 Hz, 2 H,  $\text{CH}_2$ );  $^{13}\text{C}$  NMR (100 MHz,  $\text{CDCl}_3$ ):  $\delta$  = 212.4, 171.9, 134.3, 128.7, 128.0, 126.1, 119.2, 106.4, 99.7, 27.7, 24.0, 16.5, 16.4.

**(21) Preparation of (*S*)-2-allyl-4-phenyl-2,3-pentadienoic acid ((*S*)-**2s**) (wj-1-136)**

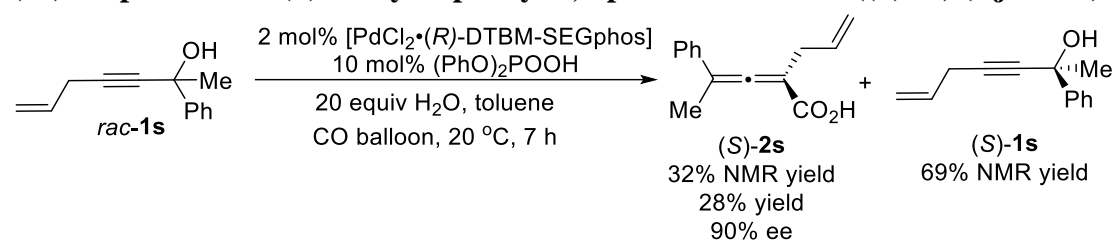

Following Typical Procedure II, the reaction of  $[\text{PdCl}_2 \cdot (\text{R})\text{-DTBM-SEGphos}]$  (13.7 mg, 0.01 mmol),  $(\text{PhO})_2\text{PO}_2\text{H}$  (12.4 mg, 0.05 mmol), *rac*-**1s** (93.2 mg, 0.5 mmol), and  $\text{H}_2\text{O}$  (180  $\mu\text{L}$ ,  $d$  = 1.0 g/mL, 180.0 mg, 10 mmol) in toluene (2.5 mL) afforded the product (*S*)-**2s** (29.9 mg, 28%) (32% NMR yield of (*S*)-**2s** was formed with 69% of (*S*)-**1s** remained based on  $^1\text{H}$  NMR analysis of the crude product) [eluent: petroleum ether / ethyl acetate = 30/1 (940 mL), 10/1 (440 mL)]: 90% ee (HPLC conditions: AS-H column, hexane/*i*PrOH = 98/2, 1.0 mL/min,  $\lambda$  = 214 nm,  $t_{\text{R}}$  (major) = 11.1 min,  $t_{\text{R}}$  (minor) = 14.3 min); solid;  $^1\text{H}$  NMR (400 MHz,  $\text{CDCl}_3$ ):  $\delta$  = 7.47-7.30 (m, 4 H, Ar-H), 7.30-7.22 (m, 1 H, Ar-H), 5.93-5.80 (m, 1 H, =CH), 5.13 (d,  $J$  = 17.2 Hz, 1 H, one proton of = $\text{CH}_2$ ), 5.03 (d,  $J$  = 10.0 Hz, 1 H, one proton of = $\text{CH}_2$ ), 3.09 (d,  $J$  = 6.4 Hz, 2 H,  $\text{CH}_2$ ), 2.19 (s, 3 H,  $\text{CH}_3$ );  $^{13}\text{C}$  NMR (100 MHz,  $\text{CDCl}_3$ ):  $\delta$  = 213.0, 172.2, 134.8, 134.7, 128.6, 127.7, 126.1, 116.5, 105.8, 100.2, 33.1, 16.2.

**(22) Preparation of (*S*)-4-(4-bromophenyl)-2-isopropyl-2,3-pentadienoic acid ((*S*)-**2u**) (wj-1-115-2)**



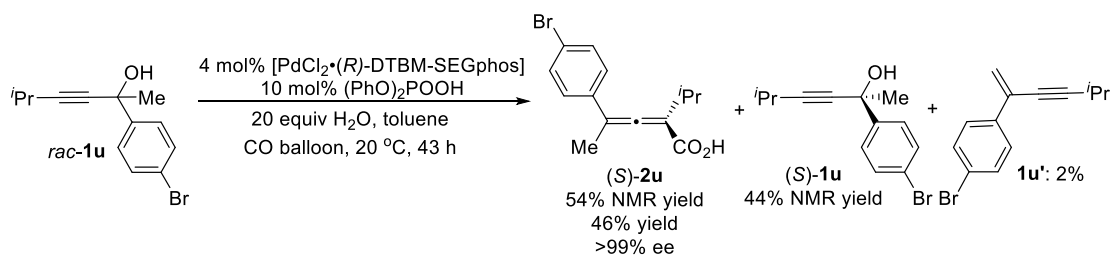

Following Typical Procedure II, the reaction of [PdCl<sub>2</sub>•(*R*)-DTBM-SEGphos] (27.2 mg, 0.02 mmol), (PhO)<sub>2</sub>PO<sub>2</sub>H (12.4 mg, 0.05 mmol), *rac*-**1u** (133.6 mg, 0.5 mmol), and H<sub>2</sub>O (180 μL, d = 1.0 g/mL, 180.0 mg, 10 mmol) in toluene (2.5 mL) afforded the product *(S)*-**2u** (68.3 mg, 46%) (54% NMR yield of *(S)*-**2u** and 2% of **1u'** were formed with 44% of *(S)*-**1u** remained based on <sup>1</sup>H NMR analysis of the crude product) [eluent: petroleum ether / ethyl ether / dichloromethane = 50/1/1 (832 mL), 8/1 (450 mL)]; >99% ee (HPLC conditions: AS-H column, hexane/<sup>*i*</sup>PrOH = 98/2, 1.0 mL/min, λ = 214 nm, *t*<sub>R</sub> (major) = 11.5 min); solid; <sup>1</sup>H NMR (400 MHz, CDCl<sub>3</sub>): δ = 7.46 (d, *J* = 8.8 Hz, 2 H, Ar-H), 7.25 (d, *J* = 8.8 Hz, 2 H, Ar-H), 2.85-2.74 (m, 1 H, CH), 2.18 (s, 3 H, CH<sub>3</sub>), 1.09 (d, *J* = 6.8 Hz, 6 H, 2 x CH<sub>3</sub>); <sup>13</sup>C NMR (100 MHz, CDCl<sub>3</sub>): δ = 211.3, 172.0, 134.0, 131.7, 127.5, 121.5, 109.0, 105.9, 28.2, 22.13, 22.06, 16.3.

**(23) Preparation of (*S*)-2-propyl-4-(2-methylphenyl)-2,3-hexadienoic acid ((*S*)-**2t**) (wj-1-083-2)**

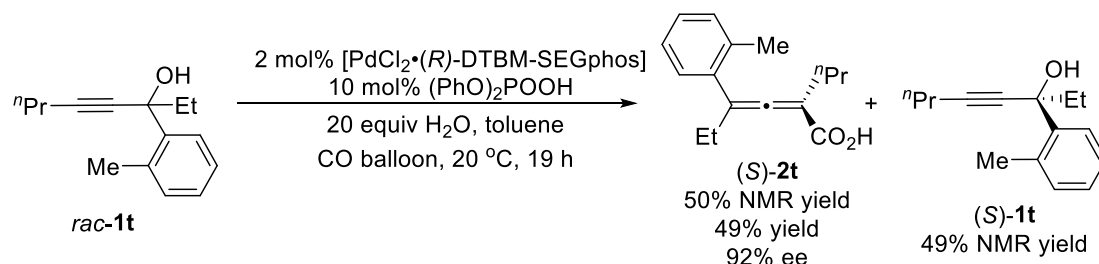

Following Typical Procedure II, the reaction of [PdCl<sub>2</sub>•(*R*)-DTBM-SEGphos] (13.5 mg, 0.01 mmol), (PhO)<sub>2</sub>PO<sub>2</sub>H (12.6 mg, 0.05 mmol), *rac*-**1t** (108.0 mg, 0.5 mmol), and H<sub>2</sub>O (180 μL, d = 1.0 g/mL, 180.0 mg, 10 mmol) in toluene (2.5 mL) afforded the product *(S)*-**2t** (59.8 mg, 49%) (50% NMR yield of *(S)*-**2t** was formed with 49% of *(S)*-**1t** remained based on <sup>1</sup>H NMR analysis of the crude product) [eluent: petroleum ether / ethyl ether / dichloromethane = 60/1/1 (868 mL), then petroleum ether

/ ethyl acetate = 20/1 (420 mL)]: 92% ee (HPLC conditions: AS-H column, hexane/<sup>i</sup>PrOH = 98/2, 1.0 mL/min,  $\lambda$  = 214 nm,  $t_R$  (major) = 6.4 min,  $t_R$  (minor) = 10.0 min); oil; <sup>1</sup>H NMR (400 MHz, CDCl<sub>3</sub>):  $\delta$  = 7.28-7.10 (m, 4 H, Ar-H), 2.50-2.33 (m, 5 H, CH<sub>2</sub> and CH<sub>3</sub>), 2.33-2.12 (m, 2 H, CH<sub>2</sub>), 1.60-1.42 (m, 2 H, CH<sub>2</sub>), 1.12 (t,  $J$  = 7.2 Hz, 3 H, CH<sub>3</sub>), 0.93 (t,  $J$  = 7.0 Hz, 3 H, CH<sub>3</sub>); <sup>13</sup>C NMR (100 MHz, CDCl<sub>3</sub>):  $\delta$  = 209.1, 173.9, 136.1, 136.0, 130.4, 128.4, 127.5, 125.8, 111.2, 100.5, 30.5, 27.1, 21.4, 20.1, 13.8, 12.2.

**(24) Preparation of (*S*)-2-butyl-4-(2-methylphenyl)-2,3-hexadienoic acid ((*S*)-2v) (wj-1-112-2)**

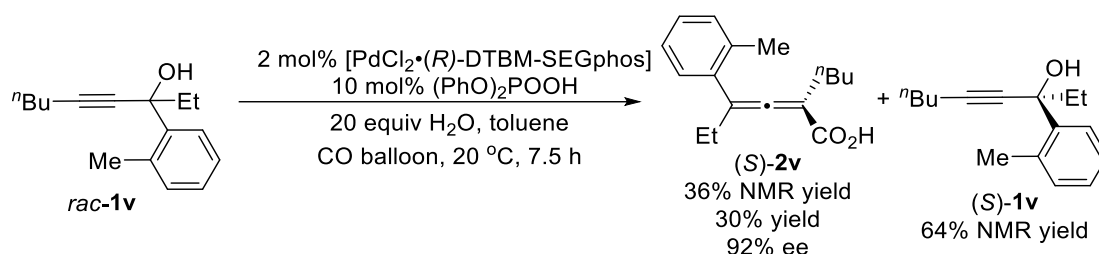

Following Typical Procedure II, the reaction of [PdCl<sub>2</sub>•(*R*)-DTBM-SEGphos] (13.5 mg, 0.01 mmol), (PhO)<sub>2</sub>PO<sub>2</sub>H (12.5 mg, 0.05 mmol), *rac*-**1v** (115.2 mg, 0.5 mmol), and H<sub>2</sub>O (180  $\mu$ L,  $d$  = 1.0 g/mL, 180.0 mg, 10 mmol) in toluene (2.5 mL) afforded the product (*S*)-**2v** (38.6 mg, 30%) (36% NMR yield of (*S*)-**2v** was formed with 64% of (*S*)-**1v** remained based on <sup>1</sup>H NMR analysis of the crude product) [eluent: petroleum ether / ethyl ether / dichloromethane = 40/1/1 (420 mL), then petroleum ether / ethyl acetate = 10/1 (440 mL)]: 92% ee (HPLC conditions: AS-H column, hexane/<sup>i</sup>PrOH = 98/2, 1.0 mL/min,  $\lambda$  = 214 nm,  $t_R$  (major) = 6.3 min,  $t_R$  (minor) = 10.5 min); oil; <sup>1</sup>H NMR (400 MHz, CDCl<sub>3</sub>):  $\delta$  = 7.29-7.12 (m, 4 H, Ar-H), 2.48-2.34 (m, 5 H, CH<sub>2</sub> and CH<sub>3</sub>), 2.33-2.16 (m, 2 H, CH<sub>2</sub>), 1.52-1.42 (m, 2 H, CH<sub>2</sub>), 1.40-1.30 (m, 2 H, CH<sub>2</sub>), 1.12 (t,  $J$  = 7.2 Hz, 3 H, CH<sub>3</sub>), 0.90 (t,  $J$  = 7.2 Hz, 3 H, CH<sub>3</sub>); <sup>13</sup>C NMR (100 MHz, CDCl<sub>3</sub>):  $\delta$  = 209.1, 173.8, 136.06, 135.03, 130.4, 128.4, 127.5, 125.8, 111.3, 100.7, 30.3, 28.1, 27.1, 22.3, 20.1, 13.9, 12.2.

**(25) Preparation of (*S*)-2-butyl-4,5-diphenyl-2,3-pentadienoic acid ((*S*)-2y) (wj-1-**

**091-2)**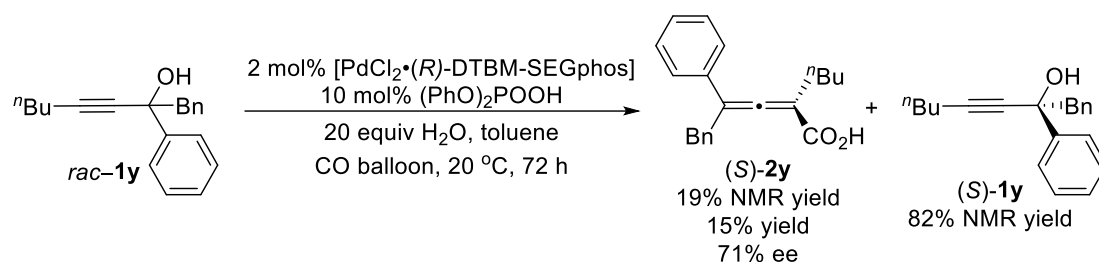

Following Typical Procedure II, the reaction of [PdCl<sub>2</sub>•(R)-DTBM-SEGphos] (13.5 g, 0.01 mmol), (PhO)<sub>2</sub>PO<sub>2</sub>H (12.5mg, 0.05 mmol), *rac*-**1y** (138.4 mg, 0.5 mmol), and H<sub>2</sub>O (180 μL, d = 1.0 g/mL, 18.0 mg, 10 mmol) in toluene (2.5 mL) afforded the product (*S*)-**2y** (23.4 mg, 15%) (19% NMR yield of (*S*)-**2y** was formed with 82% of (*S*)-**1y** remained based on <sup>1</sup>H NMR analysis of the crude product) [eluent: petroleum ether / ethyl ether / dichloromethane = 30/1/1 (384 mL), then petroleum ether / ethyl acetate = 8/1 (450 mL)]: 71% ee (HPLC conditions: AS-H column, hexane/<sup>i</sup>PrOH = 98/2, 1.0 mL/min, λ = 214 nm, t<sub>R</sub> (major) = 10.0 min, t<sub>R</sub> (minor) = 14.7 min); solid; m.p. 94.1-95.0 °C (petroleum ether/DCM); <sup>1</sup>H NMR (400 MHz, CDCl<sub>3</sub>): δ = 7.44-7.15 (m, 10 H, Ar-H), 4.00-3.77 (m, 2 H, CH<sub>2</sub>), 2.29-2.10 (m, 2 H, CH<sub>2</sub>), 1.38-1.19 (m, 4 H, 2 x CH<sub>2</sub>), 0.84 (t, J = 6.8 Hz, 3 H, CH<sub>3</sub>); <sup>13</sup>C NMR (100 MHz, CDCl<sub>3</sub>): δ = 213.5, 172.5, 138.1, 134.3, 128.9, 128.6, 128.3, 127.7, 126.6, 126.5, 109.8, 103.3, 36.9, 30.2, 28.3, 22.3, 13.8; IR (neat): ν = 3085, 3000, 2955, 2930, 2866, 2651, 2543, 1937, 1686, 1419, 1281 cm<sup>-1</sup>; MS (70 eV, EI) m/z (%): 306 (M<sup>+</sup>, 9.32), 91 (100); HRMS (EI) calcd for C<sub>21</sub>H<sub>22</sub>O<sub>2</sub> [M<sup>+</sup>]: 306.1614, found: 306.1618.

## Gram scale reactions

### (1) 1-gram scale synthesis preparation of (*S*)-2-phenyloct-3-yn-2-ol ((*S*)-1a) (wj-1-159)

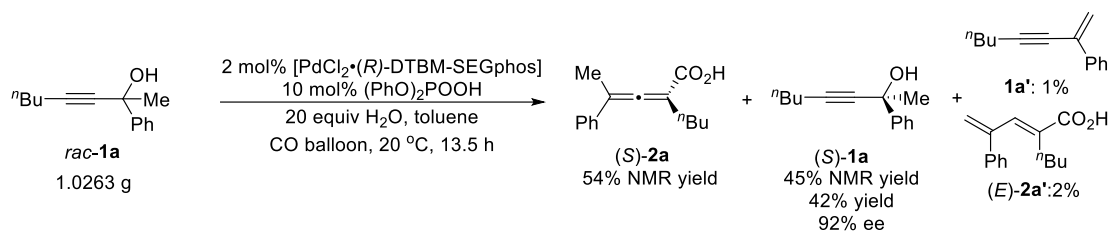

Following Typical Procedure II, the reaction of [PdCl<sub>2</sub>·(*R*)-DTBM-SEGphos] (135.9 mg, 0.1 mmol), (PhO)<sub>2</sub>PO<sub>2</sub>H (125.2 mg, 0.05 mmol), *rac*-1a (1.0263 g, 5.0 mmol), and H<sub>2</sub>O (1.8 mL, d = 1.0 g/mL, 1.8 mg, 100.0 mmol) in toluene (25.0 mL) afforded the product (*S*)-1a (427.1 mg, 42%) (54% NMR yield of (*S*)-2a, 1% of enyne, and 2% of (*E*)-2a' were formed with 45% of (*S*)-1a remained based on <sup>1</sup>H NMR analysis of the crude product) [eluent: petroleum ether / ethyl ether / dichloromethane = 30/1/1 (2880 mL), then petroleum ether / ethyl acetate = 4/1 (750 mL)]: 92% ee (HPLC conditions: AS-H column, hexane/<sup>i</sup>PrOH = 98/2, 1.0 mL/min, λ = 214 nm, t<sub>R</sub> (minor) = 7.0 min, t<sub>R</sub> (major) = 10.5 min); oil; <sup>1</sup>H NMR (400 MHz, CDCl<sub>3</sub>): δ = 7.68-7.62 (m, 2 H, Ar-H), 7.38-7.31 (m, 2 H, Ar-H), 7.30-7.24 (m, 1 H, Ar-H), 2.35 (s, 1 H, OH), 2.28 (t, *J* = 7.0 Hz, 2 H, CH<sub>2</sub>), 1.74 (s, 3 H, CH<sub>3</sub>), 1.58-1.49 (m, 2 H, CH<sub>2</sub>), 1.49-1.38 (m, 2 H, CH<sub>2</sub>), 0.93 (t, *J* = 7.2 Hz, 3 H, CH<sub>3</sub>); <sup>13</sup>C NMR (100 MHz, CDCl<sub>3</sub>): δ = 146.2, 128.2, 127.5, 124.9, 85.6, 83.7, 70.0, 33.5, 30.7, 22.0, 18.4, 13.6.

### (2) 10-gram scale synthesis preparation of (*S*)-2-butyl-4-phenyl-2,3-pentadienoic acid ((*S*)-2a) (wj-1-178)

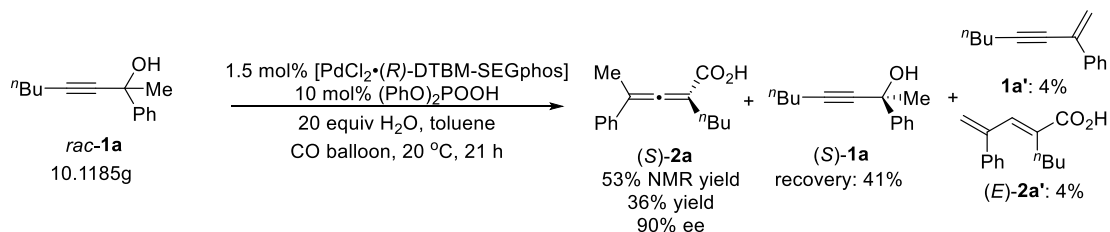

Following Typical Procedure II, the reaction of [PdCl<sub>2</sub>·(*R*)-DTBM-SEGphos] (1.0421 g, 0.77 mmol), (PhO)<sub>2</sub>PO<sub>2</sub>H (1.2533 g, 5.0 mmol), *rac*-1a (10.1185 mg, 50.0 mmol), and H<sub>2</sub>O (18.0 mL, d = 1.0 g/mL, 18.0 g, 1.0 mol) in toluene (250 mL) afforded

(*S*)-**2a** (4.2417 g, 36%, purity: 98%) (53% NMR yield of (*S*)-**2a**, 4% of enyne, and 4% of (*E*)-**2a** were formed with 41% of (*S*)-**1a** remained based on <sup>1</sup>H NMR analysis of the crude product) [eluent: petroleum ether / ethyl ether / dichloromethane = 30/1/1 (4800 mL), then petroleum ether / ethyl acetate = 4/1 (1500 mL)]: 90% ee (HPLC conditions: AS-H column, hexane/<sup>i</sup>PrOH = 98/2, 1.0 mL/min, λ = 214 nm, *t*<sub>R</sub> (major) = 8.5 min, *t*<sub>R</sub> (minor) = 11.5 min); solid; <sup>1</sup>H NMR (400 MHz, CDCl<sub>3</sub>): δ = 7.43-7.30 (m, 4 H, Ar-H), 7.28-7.23 (m, 1 H, Ar-H), 2.33 (t, *J* = 7.6 Hz, 2 H, CH<sub>2</sub>), 2.20 (s, 3 H, CH<sub>3</sub>), 1.55-1.42 (m, 2 H, CH<sub>2</sub>), 1.41-1.28 (m, 2 H, CH<sub>2</sub>), 0.88 (t, *J* = 7.2 Hz, 3 H, CH<sub>3</sub>); <sup>13</sup>C NMR (100 MHz, CDCl<sub>3</sub>): δ = 212.5, 172.4, 135.0, 128.6, 127.6, 126.1, 105.2, 101.8, 30.2, 28.3, 22.3, 16.3, 13.8.

**(3) 1-gram scale synthesis preparation of (*S*)-2-butyl-4-(4-bromophenyl)-2,3-pentadienoic acid ((*S*)-**2f**) (wj-2-115)**

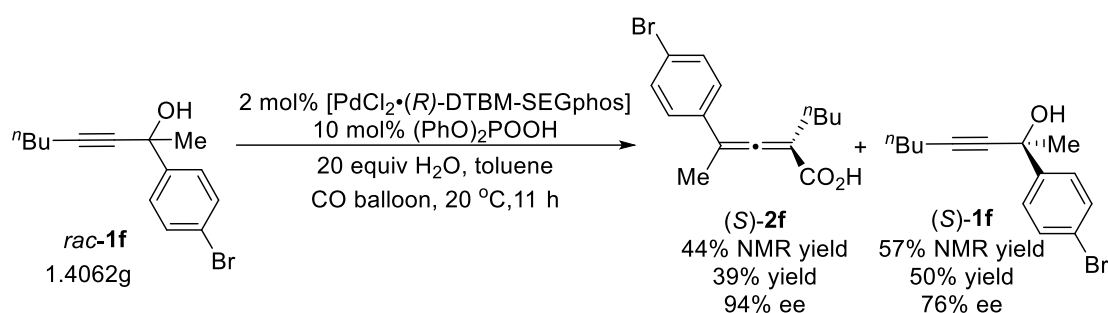

Following Typical Procedure II, the reaction of [PdCl<sub>2</sub>•(*R*)-DTBM-SEGphos] (135.5 mg, 0.1 mmol), (PhO)<sub>2</sub>PO<sub>2</sub>H (125.2 mg, 0.5 mmol), *rac*-**1f** (1.4062 g, 5.0 mmol), and H<sub>2</sub>O (1.8 mL, d = 1.0 g/mL, 1.8 g, 100 mmol) in toluene (25 mL) afforded the product (*S*)-**2f** (605.7 mg, 39%) (44% NMR yield of (*S*)-**2f** was formed with 57% of (*S*)-**1f** remained based on <sup>1</sup>H NMR analysis of the crude product) [eluent: petroleum ether / ethyl ether / dichloromethane = 30/1/1 (2400 mL), then petroleum ether / ethyl acetate = 10/1 (1100 mL) to 5/1(840 mL)]: 94% ee (HPLC conditions: AS-H column, hexane/<sup>i</sup>PrOH = 98/2, 1.0 mL/min, λ = 214 nm, *t*<sub>R</sub> (major) = 10.5 min, *t*<sub>R</sub> (minor) = 15.0 min); solid; <sup>1</sup>H NMR (400 MHz, CDCl<sub>3</sub>): δ = 7.50-7.42 (m, 2 H, Ar-H), 7.27-7.20 (m, 2 H, Ar-H), 2.32 (t, *J* = 7.6 Hz, 2 H, CH<sub>2</sub>), 2.17 (s, 3 H, CH<sub>3</sub>), 1.49-1.39 (m, 2 H, CH<sub>2</sub>), 1.39-1.28 (m, 2 H, CH<sub>2</sub>), 0.88 (t, *J* = 7.2 Hz, 3 H, CH<sub>3</sub>); <sup>13</sup>C NMR (100 MHz, CDCl<sub>3</sub>):

$\delta = 212.4, 172.3, 134.1, 131.7, 127.6, 121.6, 104.5, 102.2, 30.2, 28.3, 22.2, 16.3, 13.8$ .  
 And (*S*)-**1f** (707.1 mg, 50%): 76% ee (HPLC conditions: AS-H column, hexane/*i*PrOH = 98/2, 1.0 mL/min,  $\lambda = 214$  nm,  $t_R$  (minor) = 8.6 min,  $t_R$  (major) = 11.3 min); oil; **<sup>1</sup>H NMR** (400 MHz, CDCl<sub>3</sub>):  $\delta = 7.55-7.49$  (m, 2 H, Ar-H), 7.49-7.43 (m, 2 H, Ar-H), 2.31 (s, 1 H, OH), 2.27 (t,  $J = 7.0$  Hz, 2 H, CH<sub>2</sub>), 1.71 (s, 3 H, CH<sub>3</sub>), 1.57-1.48 (m, 2 H, CH<sub>2</sub>), 1.48-1.36 (m, 2 H, CH<sub>2</sub>), 0.92 (t,  $J = 7.2$  Hz, 3 H, CH<sub>3</sub>); **<sup>13</sup>C NMR** (100 MHz, CDCl<sub>3</sub>):  $\delta = 145.3, 131.2, 126.9, 121.4, 86.0, 83.2, 69.6, 33.6, 30.6, 22.0, 18.4, 13.6$ .

#### (4) Successive kinetic resolutions preparation of (*R*)-2-butyl-4-(4-bromophenyl)-2,3-pentadienoic acid ((*R*)-**2f**) (wj-2-119)

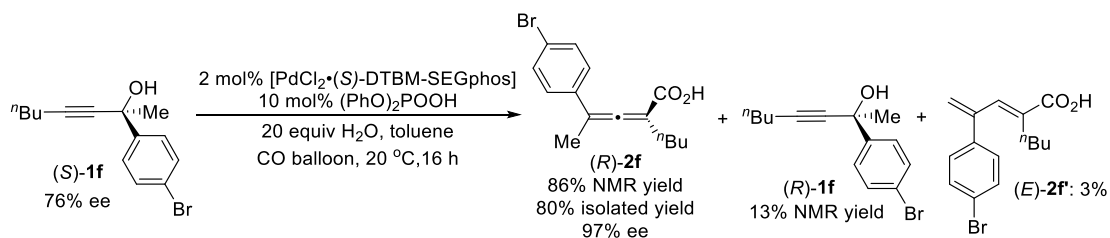

Following Typical Procedure II, the reaction of [PdCl<sub>2</sub>•(*S*)-DTBM-SEGphos] (67.7 mg, 0.05 mmol), (PhO)<sub>2</sub>PO<sub>2</sub>H (62.6 mg, 0.25 mmol), (*S*)-**1f** (0.7035 g, 2.5 mmol, 76% ee), and H<sub>2</sub>O (0.9 mL,  $d = 1.0$  g/mL, 0.9 g, 50.0 mmol) in toluene (12.5 mL) afforded the product (*R*)-**2f** (615.6 mg, 80%) (86% NMR yield of (*R*)-**2f** and 3% of (*E*)-**2f'** were formed with 13% of (*R*)-**1f** remained based on <sup>1</sup>H NMR analysis of the crude product) [eluent: petroleum ether / ethyl ether / dichloromethane = 30/1/1 (960 mL), then petroleum ether / ethyl acetate = 15/1 (480 mL) to 10/1(550 mL)]: 97% ee (HPLC conditions: AS-H column, hexane/*i*PrOH = 98/2, 1.0 mL/min,  $\lambda = 214$  nm,  $t_R$  (minor) = 10.9 min,  $t_R$  (major) = 14.2 min);  $[\alpha]_D^{24} = -18.2$  ( $c = 1.07$ , CHCl<sub>3</sub>); solid; m.p. 124.5-125.3 °C (petroleum ether/DCM); **<sup>1</sup>H NMR** (400 MHz, CDCl<sub>3</sub>):  $\delta = 7.46$  (d,  $J = 8.0$  Hz, 2 H, Ar-H), 7.24 (d,  $J = 8.0$  Hz, 2 H, Ar-H), 2.32 (t,  $J = 7.2$  Hz, 2 H, CH<sub>2</sub>), 2.17 (s, 3 H, CH<sub>3</sub>), 1.52-1.40 (m, 2 H, CH<sub>2</sub>), 1.40-1.28 (m, 2 H, CH<sub>2</sub>), 0.88 (t,  $J = 7.0$  Hz, 3 H, CH<sub>3</sub>); **<sup>13</sup>C NMR** (100 MHz, CDCl<sub>3</sub>):  $\delta = 212.4, 172.6, 134.1, 131.7, 127.6, 121.5, 104.5, 102.2, 30.2, 28.2, 22.2, 16.2, 13.8$ ; **IR** (neat):  $\nu = 3068, 2928, 2866, 2637, 2547, 1941, 1683, 1484, 1416, 1373, 1279, 1248, 1177, 1120, 1075, 1007$  cm<sup>-1</sup>; **MS** (70 eV, EI)  $m/z$  (%):

310 ( $M(^{81}\text{Br})^+$ , 2.06), 308 ( $M(^{79}\text{Br})^+$ , 1.83), 142 (100); Anal. Calcd. for  $\text{C}_{15}\text{H}_{17}\text{BrO}_2$ : C 58.27, H 5.54; found: C 57.98, H 5.54.

## Synthetic transformations

### (1) Preparation of (*R,E*)-3-(4-methoxycarbonylphenyl)-2-phenyloct-3-en-2-ol ((*R,E*)-3) (wj-1-163)<sup>6</sup>

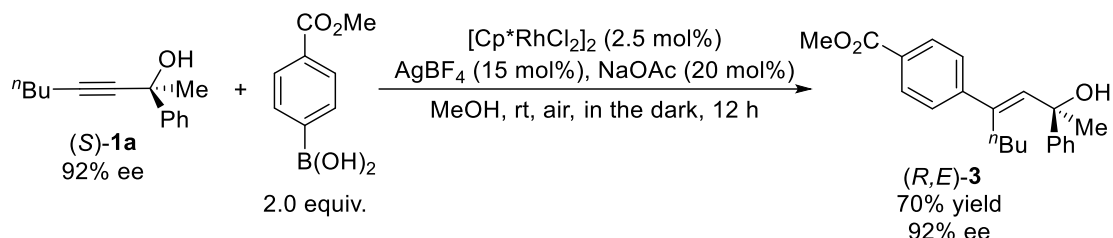

**Typical Procedure III:** To a Schlenk flask covered with aluminium foil paper was added  $\text{AgBF}_4$  (14.7 mg, 0.075 mmol) in a glove box. After transferring out of the glove box,  $[\text{Cp}^*\text{RhCl}_2]_2$  (7.7 mg, 0.012 mmol),  $\text{NaOAc}$  (8.4 mg, 0.10 mmol), (4-MeO<sub>2</sub>C)C<sub>6</sub>H<sub>4</sub>B(OH)<sub>2</sub> (180.1 mg, 1.0 mmol), (*S*)-1a (100.9 mg, 0.5 mmol, 92% ee), and MeOH (2.5 mL) were sequentially added to the Schlenk flask without inert atmosphere protection. The resulting mixture was stirred at room temperature as monitored by TLC. After 12 h, the resulting mixture was filtered through a short column of celite (3 cm) eluted with MeOH (20 mL) and concentrated. The residue was purified by column chromatography on silica gel to afford the product (*R,E*)-3 (118.3 mg, 70%) [eluent: petroleum ether/ethyl acetate = 40/1 (1230 mL) to 10/1 (220 mL)]: 92% ee (HPLC conditions: AS-H column, hexane/*i*PrOH = 95/5, 1.0 mL/min,  $\lambda = 214$  nm,  $t_R$  (major) = 9.6 min,  $t_R$  (minor) = 10.8 min);  $[\alpha]_D^{25} = -64.4$  ( $c = 1.08$ ,  $\text{CHCl}_3$ ); oil; <sup>1</sup>H NMR (400 MHz,  $\text{CDCl}_3$ )  $\delta = 7.98$  (d,  $J = 8.4$  Hz, 2 H, Ar-H), 7.56-51 (m, 2 H, Ar-H), 7.42-7.30 (m, 4 H, Ar-H), 7.28-7.22 (m, 1 H, Ar-H), 6.18 (s, 1 H, =CH), 3.91 (s, 3 H, CH<sub>3</sub>), 2.48-2.36 (m, 2 H, CH<sub>2</sub>), 2.04 (s, 1 H, OH), 1.74 (s, 3 H, CH<sub>3</sub>), 1.07-0.81 (m, 4 H, 2 x CH<sub>2</sub>), 0.64 (t,  $J = 7.0$  Hz, 3 H, CH<sub>3</sub>); <sup>13</sup>C NMR (100 MHz,  $\text{CDCl}_3$ )  $\delta = 167.0$ , 148.5, 147.8, 144.3, 137.2, 129.6, 128.8, 128.2, 126.7, 126.7, 125.1, 74.2, 52.0, 33.7, 29.88, 29.85, 22.6, 13.7; IR (neat)  $\nu = 3509$ , 2955, 2928, 2859, 1720, 1706, 1605, 1435, 1276, 1180, 1105  $\text{cm}^{-1}$ ; MS (ESI)  $m/z$ : 361 ( $\text{M}+\text{Na}^+$ ); HRMS (ESI) calcd for C<sub>22</sub>H<sub>26</sub>O<sub>3</sub>Na [ $\text{M}+\text{Na}^+$ ]: 361.1774, found: 361.1765.

### (2) Preparation of (*E*)-3-(4-methoxycarbonylphenyl)-2-phenyloct-3-en-2-ol ((*E*)-3)



**(wj-1-139)**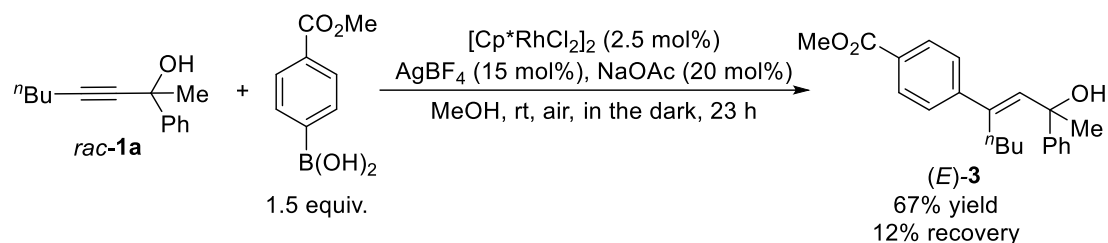

Following Typical Procedure III: the reaction of  $\text{AgBF}_4$  (14.5 mg, 0.074 mmol),  $[\text{Cp}^*\text{RhCl}_2]_2$  (7.6 mg, 0.012 mmol), NaOAc (8.2 mg, 0.10 mmol), (4-MeO<sub>2</sub>C)<sub>6</sub>H<sub>4</sub>B(OH)<sub>2</sub> (135.1 mg, 0.75 mmol), *rac*-**1a** (101.2 mg, 0.5 mmol), and MeOH (2.5 mL) afforded the product (*E*)-**3** (112.7 mg, 67%) [eluent: petroleum ether/ethyl acetate = 50/1 (1020 mL) to 10/1 (440 mL)]: oil; <sup>1</sup>H NMR (400 MHz, CDCl<sub>3</sub>) δ = 7.98 (d, *J* = 8.4 Hz, 2 H, Ar-H), 7.61-49 (m, 2 H, Ar-H), 7.44-7.30 (m, 4 H, Ar-H), 7.29-7.23 (m, 1 H, Ar-H), 6.17 (s, 1 H, =CH), 3.91 (s, 3 H, CH<sub>3</sub>), 2.53-2.37 (m, 2 H, CH<sub>2</sub>), 2.10-2.00 (m, 1 H, OH), 1.74 (s, 3 H, CH<sub>3</sub>), 1.06-0.82 (m, 4 H, 2 x CH<sub>2</sub>), 0.64 (t, *J* = 7.0 Hz, 3 H, CH<sub>3</sub>); <sup>13</sup>C NMR (100 MHz, CDCl<sub>3</sub>) δ = 167.0, 148.5, 147.8, 144.2, 137.3, 129.6, 128.7, 128.1, 126.7, 126.6, 125.1, 74.2, 52.0, 33.7, 29.9, 29.8, 22.6, 13.7; IR (neat) ν = 3501, 2955, 2928, 2860, 1720, 1705, 1605, 1435, 1276, 1180, 1105 cm<sup>-1</sup>; MS (ESI) *m/z*: 321 (M-OH)<sup>+</sup>; HRMS (ESI) calcd for C<sub>22</sub>H<sub>26</sub>O<sub>3</sub>Na [M+Na<sup>+</sup>]: 361.1774, found: 361.1780.

**(3) Preparation of (*R,E*)-2-phenyloct-3-en-2-ol ((*R,E*)-4) (wj-1-181)**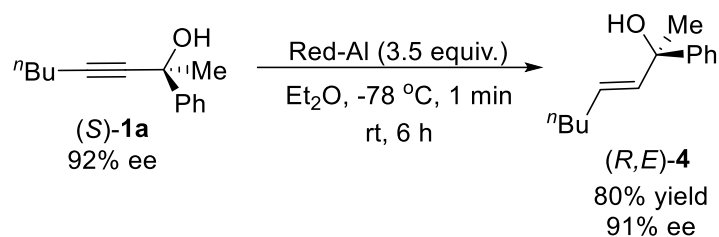

To a flame-dried Schlenk tube were added (*S*)-**1a** (40.6 mg, 0.2 mmol, 92% ee) and ethyl ether (1 mL) under argon. The resulting mixture was then cooled down to -78 °C. To the reaction mixture was added a solution of Red-Al (70 wt% in toluene, 0.2 mL, 0.7 mmol) dropwise in 1 minute at -78 °C. Then the reaction mixture was stirred for 6 h at room temperature and subsequently quenched by dropwise addition of MeOH (2

mL) at -78 °C. To the mixture was added a saturated aqueous solution of potassium sodium tartrate (Rochelle's salt) (2 mL). After extraction with ethyl acetate (2 mL x 3), the organic layer was washed with brine (5 mL) and dried over anhydrous Na<sub>2</sub>SO<sub>4</sub>. After filtration and concentration under reduced pressure, the crude product was purified by column chromatography on silica gel to afford the product (*R,E*)-**4**<sup>7</sup> (33.0 mg, 80%) [eluent: petroleum ether/ethyl acetate = 40/1 (410 mL)]: 91% ee (HPLC conditions: AS-H column, hexane/*i*PrOH = 98/2, 1.0 mL/min, λ = 214 nm, t<sub>R</sub> (minor) = 6.1 min, t<sub>R</sub> (major) = 6.9 min); oil; <sup>1</sup>H NMR (400 MHz, CDCl<sub>3</sub>) δ = 7.50-7.43 (m, 2 H, Ar-H), 7.33 (t, *J* = 7.4 Hz, 2 H, Ar-H), 7.27-7.21 (m, 1 H, Ar-H), 5.77 (d, *J* = 15.6 Hz, 1 H, =CH), 5.67 (dt, *J*<sub>1</sub> = 15.6 Hz, *J*<sub>2</sub> = 6.5 Hz, 1 H, =CH), 2.06 (q, *J* = 6.8 Hz, 2 H, CH<sub>2</sub>), 1.88 (s, 1 H, OH), 1.63 (s, 3 H, CH<sub>3</sub>), 1.42-1.25 (m, 4 H, 2 x CH<sub>2</sub>), 0.89 (t, *J* = 7.0 Hz, 3 H, CH<sub>3</sub>); <sup>13</sup>C NMR (100 MHz, CDCl<sub>3</sub>) δ = 147.3, 136.8, 129.2, 128.1, 126.7, 125.2, 74.4, 31.9, 31.4, 29.9, 22.2, 13.9.

**(4) Preparation of (*R,Z*)-4-phenoxy-2-phenyloct-3-en-2-ol ((*R,Z*)-**5**) (wj-1-166)<sup>8</sup>**

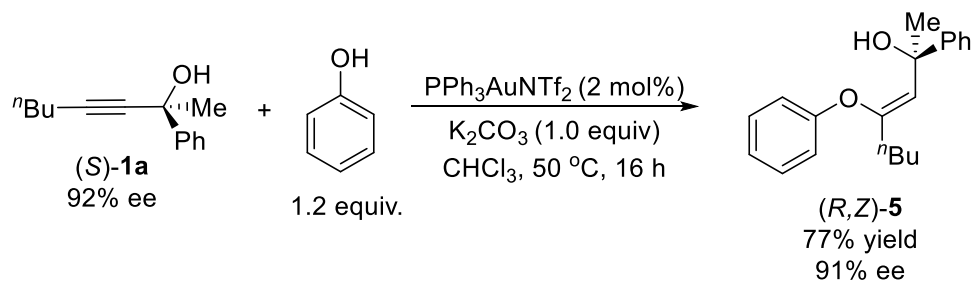

**Typical Procedure IV:** To a Schlenk flask were added PPh<sub>3</sub>AuNTf<sub>2</sub> (7.5 mg, 0.01 mmol), K<sub>2</sub>CO<sub>3</sub> (69.3 mg, 0.5 mmol), and PhOH (58.0 mg, 0.6 mmol). After addition, the flask was degassed and refilled with Ar for three times to ensure the complete exclusion of air. Then (*S*)-**1a** (101.1 mg, 0.5 mmol, 92% ee) and CHCl<sub>3</sub> (0.3 mL) were added sequentially. The reaction was then stirred at 50 °C as monitored by TLC. After 16 h, the resulting mixture was diluted with 5 mL of ethyl acetate, filtered through a short column silica gel (3 cm) eluted with ethyl acetate (20 mL), and concentrated. The residue was purified by column chromatography on silica gel to afford the product (*R,Z*)-**5** (113.5 mg, 77%) [eluent: petroleum ether/ethyl acetate = 50/1 (510 mL)]: 91% ee (HPLC conditions: IC column, hexane/*i*PrOH = 99.5/0.5, 0.5 mL/min, λ = 214 nm,

$t_R$  (major) = 22.9 min,  $t_R$  (minor) = 24.3 min);  $[\alpha]_D^{25} = +9.4$  ( $c = 1.36$ ,  $\text{CHCl}_3$ ); oil;  $^1\text{H NMR}$  (400 MHz,  $\text{CDCl}_3$ )  $\delta = 7.52\text{-}7.45$  (m, 2 H, Ar-H), 7.31-7.23 (m, 2 H, Ar-H), 7.23-7.13 (m, 3 H, Ar-H), 7.02-6.95 (m, 1 H, Ar-H), 6.80-6.72 (m, 2 H, Ar-H), 5.47 (s, 1 H, =CH), 3.85 (s, 1 H, OH), 2.13-1.98 (m, 2 H,  $\text{CH}_2$ ), 1.65 (s, 3 H,  $\text{CH}_3$ ), 1.40 (quint,  $J = 7.5$  Hz, 2 H,  $\text{CH}_2$ ), 1.32-1.21 (m, 2 H,  $\text{CH}_2$ ), 0.84 (t,  $J = 7.2$  Hz, 3 H,  $\text{CH}_3$ );  $^{13}\text{C NMR}$  (100 MHz,  $\text{CDCl}_3$ )  $\delta = 154.8, 152.3, 149.1, 129.3, 127.9, 126.3, 124.8, 122.8, 121.7, 118.0, 73.6, 31.7, 31.3, 28.9, 21.9, 13.8$ ; **IR** (neat)  $\nu = 3562, 3059, 3027, 2956, 2930, 2871, 1676, 1594, 1489, 1446, 1375, 1329, 1211, 1162, 1089, 1071, 1025$   $\text{cm}^{-1}$ ; **MS** (ESI)  $m/z$ : 319 ( $\text{M}+\text{Na}^+$ ); **HRMS** (ESI) calcd for  $\text{C}_{20}\text{H}_{24}\text{O}_2\text{Na}$  [ $\text{M}+\text{Na}^+$ ]: 319.1669, found: 319.1661.

#### (5) Preparation of (Z)-4-phenoxy-2-phenyloct-3-en-2-ol ((Z)-5) (wj-1-156)

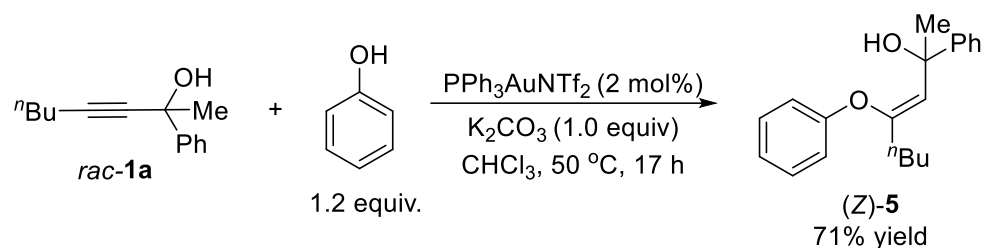

Following Typical Procedure IV, the reaction of  $\text{PPh}_3\text{AuNTf}_2$  (8.2 mg, 0.01 mmol),  $\text{K}_2\text{CO}_3$  (70.4 mg, 0.5 mmol),  $\text{PhOH}$  (56.9 mg, 0.60 mmol), *rac*-1a (101.6 mg, 0.5 mmol), and  $\text{CHCl}_3$  (0.3 mL) afforded the product (Z)-5 (106.2 mg, 71%) [eluent: petroleum ether/ethyl acetate = 50/1 (510 mL)]; oil;  $^1\text{H NMR}$  (400 MHz,  $\text{CDCl}_3$ )  $\delta = 7.53\text{-}7.45$  (m, 2 H, Ar-H), 7.31-7.23 (m, 2 H, Ar-H), 7.23-7.14 (m, 3 H, Ar-H), 7.02-6.96 (m, 1 H, Ar-H), 6.80-6.73 (m, 2 H, Ar-H), 5.47 (s, 1 H, =CH), 3.86 (s, 1 H, OH), 2.12-1.99 (m, 2 H,  $\text{CH}_2$ ), 1.65 (s, 3 H,  $\text{CH}_3$ ), 1.40 (quint,  $J = 7.5$  Hz, 2 H,  $\text{CH}_2$ ), 1.32-1.21 (m, 2 H,  $\text{CH}_2$ ), 0.84 (t,  $J = 7.2$  Hz, 3 H,  $\text{CH}_3$ );  $^{13}\text{C NMR}$  (100 MHz,  $\text{CDCl}_3$ )  $\delta = 154.8, 152.3, 149.1, 129.3, 127.9, 126.4, 124.8, 122.8, 121.7, 118.0, 73.6, 31.7, 31.3, 28.9, 21.9, 13.8$ ; **IR** (neat)  $\nu = 3554, 3441, 3060, 3027, 2956, 2930, 2871, 1676, 1595, 1489, 1446, 1376, 1329, 1212, 1162, 1089, 1071, 1025$   $\text{cm}^{-1}$ ; **MS** (ESI)  $m/z$ : 319 ( $\text{M}+\text{Na}^+$ ); **HRMS** (ESI) calcd for  $\text{C}_{20}\text{H}_{24}\text{O}_2\text{Na}$  [ $\text{M}+\text{Na}^+$ ]: 319.1669, found: 319.1658.

**(6) Preparation of (*R,Z*)-2-phenyl-4-(4,4,5,5-tetramethyl-1,3,2-dioxaborolan-2-yl)oct-3-en-2-ol ((*R,Z*)-6) (wj-1-179, wj-2-193)<sup>9</sup>**

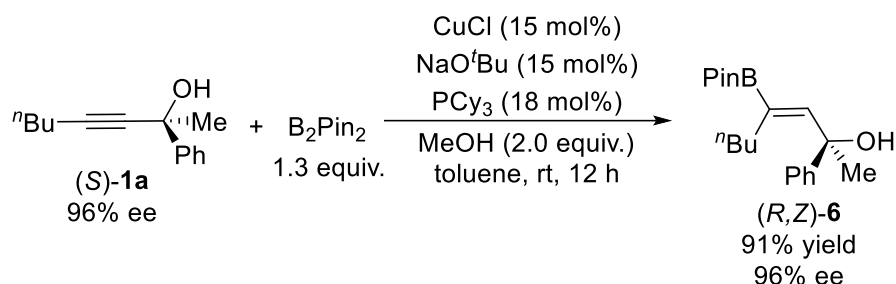

**Typical Procedure V:** To an oven-dried Schlenk flask were sequentially added B<sub>2</sub>Pin<sub>2</sub> (66.1 mg, 0.26 mmol), CuCl (3.0 mg, 0.03 mmol), NaO<sup>t</sup>Bu (2.9 mg, 0.03 mmol), and PCy<sub>3</sub> (10.1 mg, 0.036 mmol) in a glove box. After addition, the flask was degassed and refilled with Ar for three times to ensure the complete exclusion of air. Then (*S*)-1a (40.3 mg, 0.2 mmol, 96% ee)/toluene (0.5 mL), MeOH (16.2 μL, d = 0.791 g/mL, 0.4 mmol)/toluene (0.1 mL) were added sequentially. And the reaction was stirred at room temperature for 12 h as monitored by TLC, quenched with MeOH (2 mL), filtered through a short column Celite (3 cm) eluted with ethyl acetate (10 mL), and concentrated. The residue was purified by column chromatography on silica gel to afford the product (*R,Z*)-6 (60.1 mg, 91%) [eluent: petroleum ether/ethyl acetate = 30/1 (465 mL) to 20:1 (420 mL)]: 96% ee (HPLC conditions: AD-H column, hexane/<sup>i</sup>PrOH = 98/2, 1.0 mL/min, λ = 214 nm, t<sub>R</sub> (major) = 6.9 min, t<sub>R</sub> (minor) = 7.7 min); [α]<sub>D</sub><sup>28</sup> = +8.9 (c = 1.50, CHCl<sub>3</sub>); oil; <sup>1</sup>H NMR (400 MHz, CDCl<sub>3</sub>) δ = 7.49 (d, J = 7.6 Hz, 2 H, Ar-H), 7.30 (t, J = 7.6 Hz, 2 H, Ar-H), 7.24-7.18 (m, 1 H, Ar-H), 6.67 (s, 1 H, =CH), 2.04 (t, J = 7.4 Hz, 2 H, CH<sub>2</sub>), 1.96 (s, 1 H, OH), 1.67 (s, 3 H, CH<sub>3</sub>), 1.26 (s, 12 H, 4 x CH<sub>3</sub>), 1.16-0.97 (m, 4 H, 2 x CH<sub>2</sub>), 0.72 (t, J = 7.0 Hz, 3 H, CH<sub>3</sub>); <sup>13</sup>C NMR (100 MHz, CDCl<sub>3</sub>) δ = 149.5, 148.3, 128.0, 126.5, 125.2, 83.3, 74.9, 32.6, 31.6, 29.4, 24.70, 24.67, 22.9, 13.9; IR (neat) ν = 3485, 2977, 2929, 1621, 1446, 1371, 1341, 1307, 1213, 1139, 1090, 1064, 1028 cm<sup>-1</sup>; MS (70 eV, EI) m/z: 330 (M<sup>+</sup>), 217 (100); HRMS (EI) calcd for C<sub>20</sub>H<sub>31</sub>O<sub>3</sub><sup>10</sup>B [M<sup>+</sup>]: 329.2397, found: 329.2400.

**(7) Preparation of (*Z*)-2-phenyl-4-(4,4,5,5-tetramethyl-1,3,2-dioxaborolan-2-**

**yl)oct-3-en-2-ol ((Z)-6) (wj-1-168, wj-2-176)**

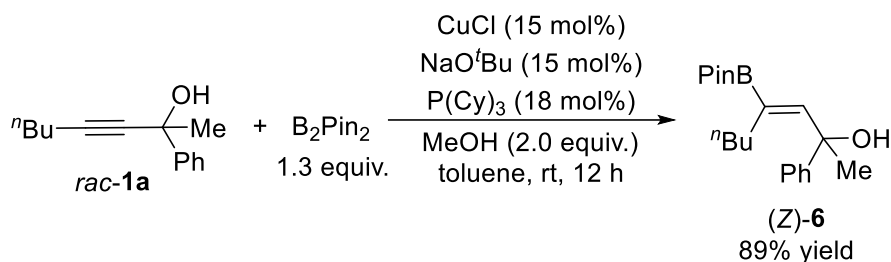

Following Typical Procedure V, the reaction of B<sub>2</sub>Pin<sub>2</sub> (165.0 mg, 0.65 mmol), CuCl (7.4mg, 0.075 mmol), NaO<sup>t</sup>Bu (7.3 mg, 0.076 mmol), and P(Cy)<sub>3</sub> (25.3 mg, 0.09 mmol), *rac*-**1a** (101.3 mg, 0.5 mmol)/toluene (1.0 mL), MeOH (40.5 μL, d = 0.791 g/mL, 1.0 mmol)/toluene (0.5 mL) afforded the product *(Z)*-**6** (147.0 mg, 89%) [eluent: petroleum ether/ethyl acetate = 40/1 (410 mL) to 30:1 (620 mL)]; oil; <sup>1</sup>H NMR (400 MHz, CDCl<sub>3</sub>) δ = 7.49 (d, *J* = 7.6 Hz, 2 H, Ar-H), 7.31 (t, *J* = 7.6 Hz, 2 H, Ar-H), 7.24-7.18 (m, 1 H, Ar-H), 6.67 (s, 1 H, =CH), 2.04 (t, *J* = 7.4 Hz, 2 H, CH<sub>2</sub>), 1.94 (s, 1 H, OH), 1.68 (s, 3 H, CH<sub>3</sub>), 1.26 (s, 12 H, 4 x CH<sub>3</sub>), 1.18-0.97 (m, 4 H, 2 x CH<sub>2</sub>), 0.72 (t, *J* = 7.0 Hz, 3 H, CH<sub>3</sub>); <sup>13</sup>C NMR (100 MHz, CDCl<sub>3</sub>) δ = 149.5, 148.3, 128.0, 126.5, 125.2, 83.3, 74.9, 32.6, 31.6, 29.4, 24.70, 24.67, 22.9, 13.9; IR (neat) ν = 3491, 2977, 2870, 1621, 1446, 1371, 1341, 1307, 1214, 1138, 1090, 1063, 1028 cm<sup>-1</sup>; MS (70 eV, EI) *m/z*: 330 (M<sup>+</sup>, 9.75), 217 (100); HRMS (EI) calcd for C<sub>20</sub>H<sub>31</sub>O<sub>3</sub><sup>10</sup>B [M<sup>+</sup>]: 329.2397, found: 329.2398.

**(8) Preparation of (*R*)-5-(4-bromophenyl)-3-butyl-5-methylfuran-2(*5H*)-one ((*R*)-7) (wj-2-131)<sup>10</sup>**

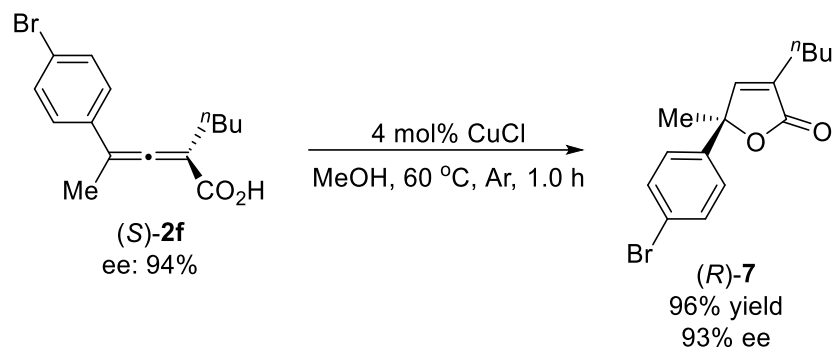

**Typical Procedure VI:** To an oven-dried Schlenk flask were added (*S*)-**2f** (154.7 mg, 0.5 mmol, 94% ee), and CuCl (2.1 mg, 0.02 mmol) in a glove box. After the flask

was degassed and refilled with Ar for three times to ensure the complete exclusion of air, MeOH (5.0 mL) was added sequentially. The resulting mixture was vigorously stirred at 60 °C for 1 h as monitored by TLC, diluted with ethyl acetate (2 mL), filtered through a short column of silica gel (3 cm) eluted with ethyl acetate (20 mL), and concentrated. The residue was purified by chromatography on silica gel to afford the product (*R*)-**7** (148.1 mg, 96%) [eluent: petroleum ether / ethyl acetate = 15/1 (320 mL)]: 93% ee (HPLC conditions: OD-H column, hexane/<sup>i</sup>PrOH = 99.5/0.5, 1.0 mL/min, λ = 214 nm, *t*<sub>R</sub> (major) = 13.3 min, *t*<sub>R</sub> (minor) = 14.7 min); [α]<sub>D</sub><sup>25</sup> = +124.0 (*c* = 1.09, CHCl<sub>3</sub>); oil; <sup>1</sup>H NMR (400 MHz, CDCl<sub>3</sub>): δ = 7.53-7.45 (m, 2 H, Ar-H), 7.30-7.22 (m, 2 H, Ar-H), 7.16 (t, *J* = 1.6 Hz, 1 H, =CH), 2.35-2.22 (m, 2 H, CH<sub>2</sub>), 1.76 (s, 3 H, CH<sub>3</sub>), 1.59-1.49 (m, 2 H, CH<sub>2</sub>), 1.42-1.30 (m, 2 H, CH<sub>2</sub>), 0.92 (t, *J* = 7.2 Hz, 3 H, CH<sub>3</sub>); <sup>13</sup>C NMR (100 MHz, CDCl<sub>3</sub>): δ = 172.9, 151.6, 139.3, 132.8, 131.8, 126.5, 122.1, 86.0, 29.4, 26.7, 24.7, 22.2, 13.7; IR (neat): ν = 3075, 2957, 2929, 2866, 1752, 1487, 1459, 1395, 1283, 1248, 1225, 1121, 1078, 1043, 1007 cm<sup>-1</sup>; MS (70 eV, EI) *m/z* (%): 310 (M(<sup>81</sup>Br)<sup>+</sup>, 11.02), 308 (M(<sup>79</sup>Br)<sup>+</sup>, 11.24), 267 (100); HRMS (EI) calcd for C<sub>15</sub>H<sub>17</sub><sup>79</sup>BrO<sub>2</sub> [M<sup>+</sup>]: 308.0406, found: 308.0406.

**(9) Preparation of 5-(4-bromophenyl)-3-butyl-5-methylfuran-2(5*H*)-one (*rac*-**7**) (wj-2-130)**

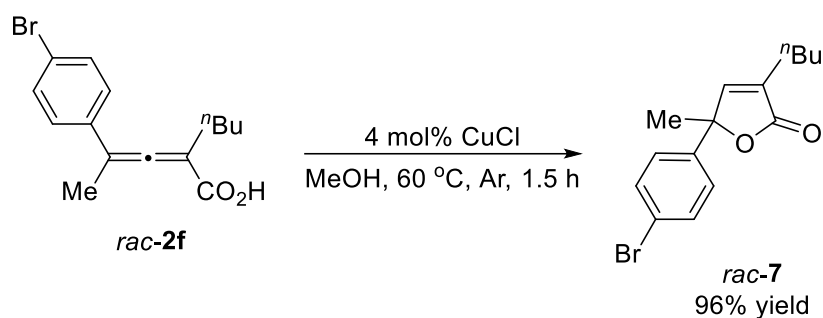

Following Typical Procedure VI, the reaction of *rac*-**2f** (154.6 mg, 0.5 mmol), CuCl (2.1 mg, 0.02 mmol), and MeOH (5.0 mL) afforded the product *rac*-**7** (148.2 mg, 96%) [eluent: petroleum ether / ethyl acetate = 15/1 (320 mL)]; oil; <sup>1</sup>H NMR (400 MHz, CDCl<sub>3</sub>): δ = 7.54-7.46 (m, 2 H, Ar-H), 7.30-7.22 (m, 2 H, Ar-H), 7.16 (t, *J* = 1.6 Hz, 1 H, =CH), 2.34-2.22 (m, 2 H, CH<sub>2</sub>), 1.76 (s, 3 H, CH<sub>3</sub>), 1.60-1.49 (m, 2 H, CH<sub>2</sub>), 1.43-

1.30 (m, 2 H, CH<sub>2</sub>), 0.92 (t,  $J = 7.2$  Hz, 3 H, CH<sub>3</sub>); <sup>13</sup>C NMR (100 MHz, CDCl<sub>3</sub>):  $\delta = 172.9, 151.6, 139.3, 132.8, 131.8, 126.5, 122.1, 86.0, 29.4, 26.7, 24.7, 22.2, 13.7$ ; IR (neat):  $\nu = 3082, 2957, 2929, 2866, 1752, 1487, 1460, 1395, 1283, 1248, 1224, 1121, 1078, 1043, 1007$  cm<sup>-1</sup>; MS (70 eV, EI)  $m/z$  (%): 310 (M(<sup>81</sup>Br)<sup>+</sup>, 8.75), 308 (M(<sup>79</sup>Br)<sup>+</sup>, 8.44), 265 (100); HRMS (EI) calcd for C<sub>15</sub>H<sub>17</sub><sup>79</sup>BrO<sub>2</sub> [M<sup>+</sup>]: 308.0406, found: 308.0408.

### (10) Preparation of **8** (wj-2-134)<sup>11</sup>

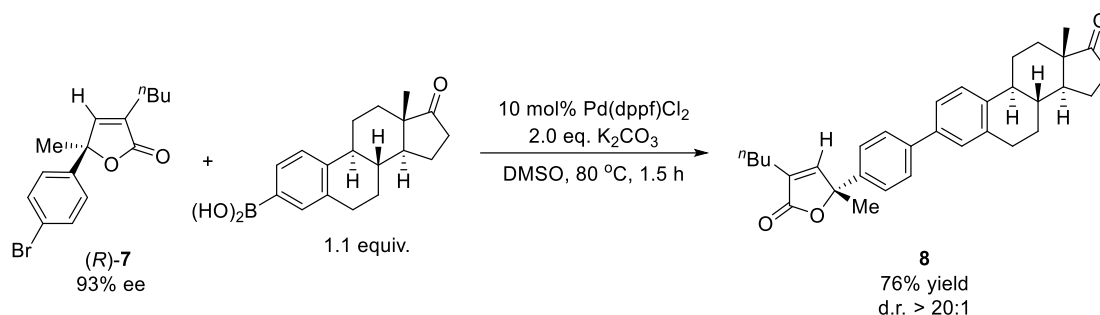

To an oven-dried Schlenk flask (25 mL) were added boronic acid (65.7 mg, 0.22 mmol), Pd(dppf)Cl<sub>2</sub> (14.6 mg, 0.02 mmol), and K<sub>2</sub>CO<sub>3</sub> (55.3 mg, 0.4 mmol). After the flask was degassed and refilled with Ar for three times to ensure the complete exclusion of air, (*R*)-**7** (61.8 mg, 0.2 mmol, 93% ee) and DMSO (2 mL) were added sequentially. The resulting mixture was stirred at 80 °C for 1.5 h as monitored by TLC, quenched with 2 mL of H<sub>2</sub>O, and extracted with ethyl acetate (5 mL x 3). The combined organic layer was washed with brine, dried over anhydrous Na<sub>2</sub>SO<sub>4</sub>, filtered, and concentrated. The residue was purified by chromatography on silica gel to afford the product **8** (73.1 mg, 76%) [eluent: petroleum ether / ethyl acetate = 10/1 (440 mL)];  $[\alpha]_D^{23} = +132.5$  ( $c = 1.02$ , CHCl<sub>3</sub>); solid; m.p. 100.8-101.7 °C (petroleum ether/DCM); <sup>1</sup>H NMR (400 MHz, CDCl<sub>3</sub>):  $\delta = 7.57$  (d,  $J = 8.0$  Hz, 2 H, Ar-H), 7.42 (d,  $J = 8.4$  Hz, 2 H, Ar-H), 7.37 (s, 2 H, Ar-H), 7.31 (s, 1 H, Ar-H), 7.23 (s, 1 H, =CH), 3.00 (dd,  $J_1 = 9.0$  Hz,  $J_2 = 4.0$  Hz, 2 H, CH<sub>2</sub>), 2.58-2.42 (m, 2 H, CH<sub>2</sub>), 2.42-2.25 (m, 3 H, CH and CH<sub>2</sub>), 2.22-1.95 (m, 4 H, 2 x CH<sub>2</sub>), 1.82 (s, 3 H, CH<sub>3</sub>), 1.71-1.45 (m, 8 H, 2 x CH and 3 x CH<sub>2</sub>), 1.42-32 (m, 2 H, CH<sub>2</sub>), 0.97-0.90 (m, 6 H, 2 x CH<sub>3</sub>); <sup>13</sup>C NMR (100 MHz, CDCl<sub>3</sub>):  $\delta = 220.8, 173.2, 152.1, 140.8, 139.2, 138.9, 137.8, 137.0, 132.5, 127.6, 127.2, 125.9, 125.2, 124.4, 86.5, 50.4, 47.9, 44.3, 38.1, 35.8, 31.5, 29.5, 29.4, 26.8, 26.4, 25.7, 24.8, 22.3, 21.5,$

13.8, 13.7; **IR** (neat):  $\nu = 3026, 2927, 2861, 1739, 1492, 1457, 1372, 1338, 1255, 1115, 1041, 1008 \text{ cm}^{-1}$ ; **MS** (70 eV, EI)  $m/z$  (%): 482 ( $M^+$ , 33.77), 117 (100); **HRMS** (EI) calcd for  $C_{33}H_{38}O_3$  [ $M^+$ ]: 482.2815, found: 482.2816.

**(11) Preparation of (*S*)-4-allyl-5-(4-bromophenyl)-3-butyl-5-methylfuran-2(*5H*)-one ((*S*)-**9**) (wj-2-129)<sup>12</sup>**

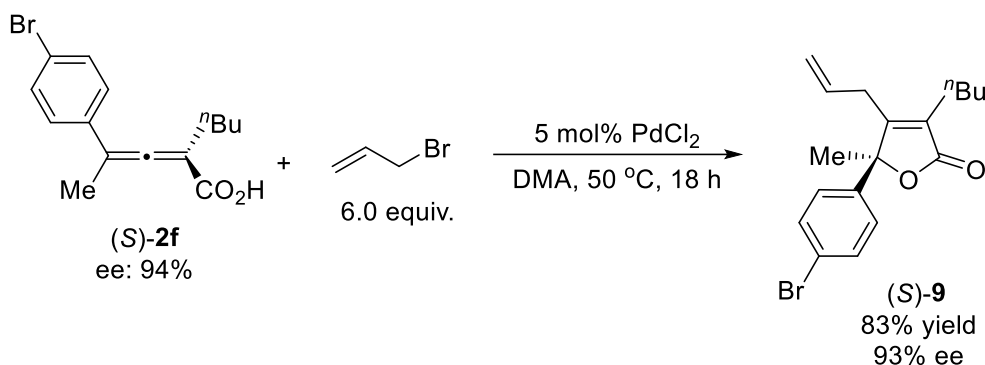

**Typical Procedure VII:** To an oven-dried Schlenk flask were added (*S*)-**2f** (154.5 mg, 0.5 mmol, 94% ee) and  $\text{PdCl}_2$  (4.4 mg, 0.025 mmol). After the flask was degassed and refilled with Ar for three times to ensure the complete exclusion of air, DMA (3 mL) and allyl bromide (260  $\mu\text{L}$ ,  $d = 1.398 \text{ g/mL}$ , 363.5 mg, 3.0 mmol) were added sequentially via a syringe under a flow of argon. The resulting mixture was vigorously stirred at 50  $^\circ\text{C}$  for 18 h as monitored by TLC, quenched with 5 mL of  $\text{H}_2\text{O}$ , and extracted with  $\text{Et}_2\text{O}$  (10 mL x 3). The combined organic layer was washed with brine, dried over anhydrous  $\text{Na}_2\text{SO}_4$ , filtered, and concentrated. The residue was purified by chromatography on silica gel to afford the product (*S*)-**9** (144.9 mg, 83%) [eluent: petroleum ether / ethyl acetate = 20/1 (420 mL)]: 93% ee (HPLC conditions: OD-H column, hexane/ $i$ PrOH = 99.5/0.5, 1.0 mL/min,  $\lambda = 214 \text{ nm}$ ,  $t_R$  (major) = 12.6 min,  $t_R$  (minor) = 14.4 min);  $[\alpha]_D^{24} = +155.7$  ( $c = 1.33$ ,  $\text{CHCl}_3$ ); oil;  **$^1\text{H NMR}$**  (400 MHz,  $\text{CDCl}_3$ ):  $\delta = 7.52\text{-}7.43$  (m, 2 H, Ar-H), 7.19-7.11 (m, 2 H, Ar-H), 5.55-5.42 (m, 1 H, =CH), 5.07-4.96 (m, 2 H, =CH<sub>2</sub>), 2.99 (dd,  $J_1 = 15.6 \text{ Hz}$ ,  $J_2 = 5.6 \text{ Hz}$ , 1 H, one proton of CH<sub>2</sub>), 2.85 (dd,  $J_1 = 15.6 \text{ Hz}$ ,  $J_2 = 7.2 \text{ Hz}$ , 1 H, one proton of CH<sub>2</sub>); 2.29 (t,  $J = 7.8 \text{ Hz}$ , 2 H, CH<sub>2</sub>), 1.81(s, 3 H, CH<sub>3</sub>), 1.58-1.46 (m, 2 H, CH<sub>2</sub>), 1.40-1.28 (m, 2 H, CH<sub>2</sub>), 0.93 (t,  $J = 7.4 \text{ Hz}$ , 3 H, CH<sub>3</sub>);  **$^{13}\text{C NMR}$**  (100 MHz,  $\text{CDCl}_3$ ):  $\delta = 173.5, 163.8, 137.6,$



132.2, 131.8, 127.9, 127.3, 122.6, 117.9, 87.3, 30.6, 30.1, 23.5, 23.3, 22.6, 13.8; **IR** (neat):  $\nu = 3081, 2957, 2930, 2864, 1749, 1668, 1638, 1489, 1453, 1396, 1257, 1207, 1080, 1043, 1006 \text{ cm}^{-1}$ ; **MS** (70 eV, EI)  $m/z$  (%): 350 ( $M(^{81}\text{Br})^+$ ), 348 ( $M(^{79}\text{Br})^+$ , 25.73), 25.40), 307 (100); **HRMS** (EI) calcd for  $\text{C}_{18}\text{H}_{21}^{79}\text{BrO}_2$  [ $M^+$ ]: 348.0719, found: 348.0718.

**(12) Preparation of 4-allyl-5-(4-bromophenyl)-3-butyl-5-methylfuran-2(5*H*)-one (*rac*-9) (wj-2-126)**

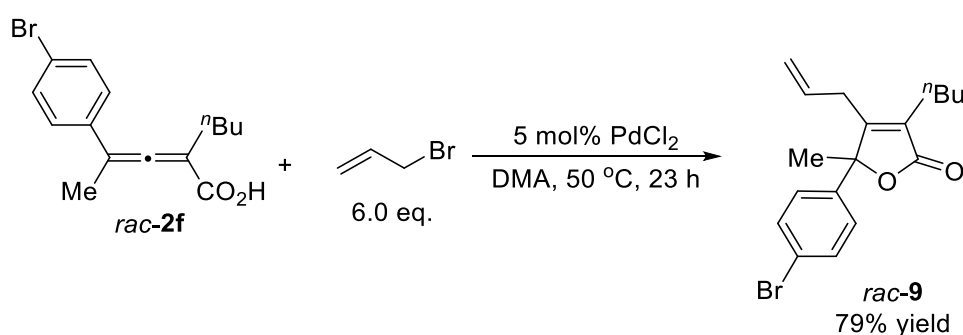

Following Typical Procedure VII: the reaction of *rac*-2f (154.7 mg, 0.5 mmol),  $\text{PdCl}_2$  (4.4 mg, 0.025 mmol), DMA (3 mL), and allyl bromide (259.6  $\mu\text{L}$ ,  $d = 1.398 \text{ g/mL}$ , 362.9 mg, 3.0 mmol) afforded *rac*-9 (137.7 mg, 79%) [eluent: petroleum ether / ethyl acetate = 20/1 (420 mL)]; oil;  **$^1\text{H NMR}$**  (400 MHz,  $\text{CDCl}_3$ ):  $\delta = 7.52\text{--}7.44$  (m, 2 H, Ar-H), 7.18–7.12 (m, 2 H, Ar-H), 5.56–5.41 (m, 1 H, =CH), 5.07–4.97 (m, 2 H, =CH<sub>2</sub>), 2.99 (ddt,  $J_1 = 15.6 \text{ Hz}$ ,  $J_2 = 5.6 \text{ Hz}$ ,  $J_3 = 1.6 \text{ Hz}$ , 1 H, one proton of CH<sub>2</sub>), 2.85 (dd,  $J_1 = 15.6 \text{ Hz}$ ,  $J_2 = 7.2 \text{ Hz}$ , 1 H, one proton of CH<sub>2</sub>); 2.29 (t,  $J = 7.8 \text{ Hz}$ , 2 H, CH<sub>2</sub>), 1.81 (s, 3 H, CH<sub>3</sub>), 1.59–1.46 (m, 2 H, CH<sub>2</sub>), 1.40–1.28 (m, 2 H, CH<sub>2</sub>), 0.92 (t,  $J = 7.4 \text{ Hz}$ , 3 H, CH<sub>3</sub>);  **$^{13}\text{C NMR}$**  (100 MHz,  $\text{CDCl}_3$ ):  $\delta = 173.5, 163.8, 137.6, 132.2, 131.8, 127.9, 127.3, 122.6, 117.9, 87.3, 30.6, 30.1, 23.5, 23.3, 22.6, 13.8$ ; **IR** (neat):  $\nu = 3085, 2958, 2931, 2864, 1749, 1668, 1637, 1490, 1453, 1396, 1256, 1207, 1079, 1043, 1006 \text{ cm}^{-1}$ ; **MS** (70 eV, EI)  $m/z$  (%): 350 ( $M(^{81}\text{Br})^+$ , 26.45), 348 ( $M(^{79}\text{Br})^+$ , 26.02), 183 (100); **HRMS** (EI) calcd for  $\text{C}_{18}\text{H}_{21}^{79}\text{BrO}_2$  [ $M^+$ ]: 348.0719, found: 348.0723.

**(13) Preparation of (*R*)-*N*-methoxy-*N*-methyl-2-butyl-4-(4-bromophenyl)-2,3-**

pentadienamide ((*R*)-**10**) (wj-2-128)<sup>13</sup>

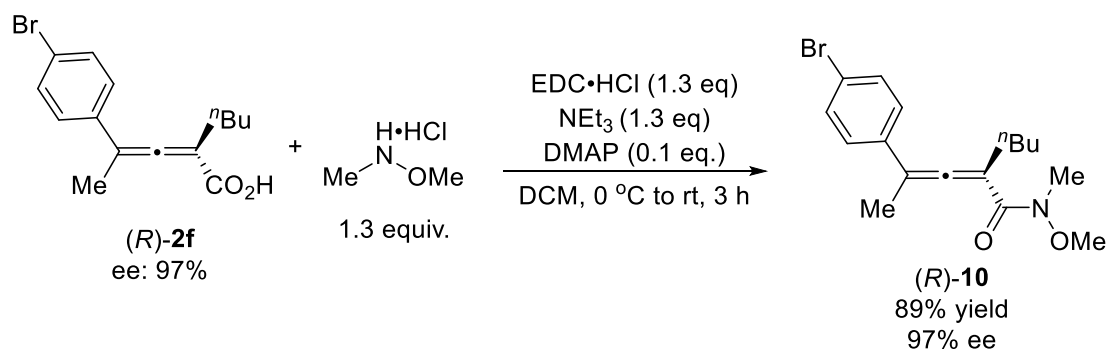

**Typical Procedure VIII:** To an oven-dried Schlenk flask were added (*R*)-**2f** (92.9 mg, 0.3 mmol, 97% ee), EDC·HCl (74.8 mg, 0.39 mmol), methyl methoxylamine hydrochloride (38.0 mg, 0.39 mmol), and DMAP (3.8 mg, 0.03 mmol). After the flask was degassed and refilled with Ar for three times to ensure the complete exclusion of air, NEt<sub>3</sub> (54.2 uL, d = 0.728 g/mL, 39.5 mg, 0.39 mmol) and DCM (1 mL) were added sequentially. The resulting mixture was vigorously stirred at 0 °C for 1 h, gradually warmed up to room temperature and stirred at room temperature for 2 h as monitored by TLC, diluted with ethyl acetate (2 mL), and washed with saturated NH<sub>4</sub>Cl (10 mL x 3). The combined organic layer was washed with brine, dried over anhydrous Na<sub>2</sub>SO<sub>4</sub>, filtered, and concentrated. The residue was purified by chromatography on silica gel to afford the product (*R*)-**10** (94.0 mg, 89%) [eluent: petroleum ether / ethyl acetate = 10/1 (220 mL)]: 97% ee (HPLC conditions: OD-H column, hexane/*i*PrOH = 99/1, 1.0 mL/min, λ = 214 nm, *t*<sub>R</sub> (major) = 8.0 min, *t*<sub>R</sub> (minor) = 9.4 min); [α]<sub>D</sub><sup>25</sup> = -131.4 (*c* = 0.99, CHCl<sub>3</sub>); oil; <sup>1</sup>H NMR (400 MHz, CDCl<sub>3</sub>): δ = 7.49-7.42 (m, 2 H, Ar-H), 7.30-7.20 (m, 2 H, Ar-H), 3.50 (s, 3 H, CH<sub>3</sub>), 3.23 (s, 3 H, CH<sub>3</sub>), 2.41 (t, *J* = 7.2 Hz, 2 H, CH<sub>2</sub>), 2.14 (s, 3 H, CH<sub>3</sub>), 1.49-1.31 (m, 4 H, 2 x CH<sub>2</sub>), 0.89 (t, *J* = 7.0 Hz, 3 H, CH<sub>3</sub>); <sup>13</sup>C NMR (100 MHz, CDCl<sub>3</sub>): δ = 206.2, 167.8, 135.1, 131.5, 127.4, 120.9, 101.4, 101.3, 61.1, 33.7, 30.1, 30.0, 22.3, 16.4, 13.9; IR (neat): ν = 2956, 2929, 2860, 1942, 1637, 1484, 1458, 1408, 1372, 1183, 1148, 1105, 1076, 1006 cm<sup>-1</sup>; MS (ESI) *m/z* (%): 354 (M(<sup>81</sup>Br)+H<sup>+</sup>), 352 (M(<sup>79</sup>Br)+H<sup>+</sup>); HRMS (ESI) calcd for C<sub>17</sub>H<sub>23</sub><sup>79</sup>BrO<sub>2</sub>N [M+H<sup>+</sup>]: 352.0907, found: 352.0904.

(14) Preparation of *N*-methoxy-*N*-methyl-2-butyl-4-(4-bromophenyl)-2,3-

**pentadienamide (*rac*-10) (wj-2-127)**

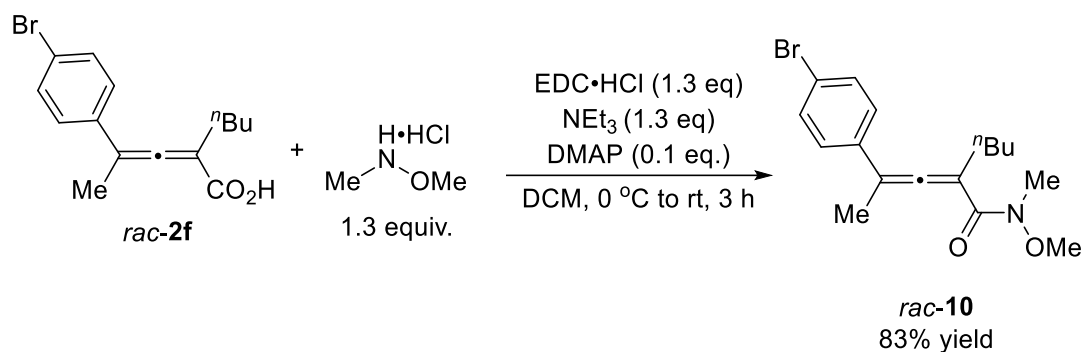

Following Typical Procedure VIII, the reaction of *rac*-2f (92.7 mg, 0.3 mmol), EDC·HCl (74.8 mg, 0.39 mmol), methyl methoxyamine hydrochloride (38.0 mg, 0.39 mmol), DMAP (3.8 mg, 0.03 mmol), NEt<sub>3</sub> (54.2  $\mu$ L,  $d = 0.728$  g/mL, 39.5 mg, 0.39 mmol), and DCM (1 mL) afforded the product *rac*-10 (88.0 mg, 83%) [eluent: petroleum ether / ethyl acetate = 10/1 (220 mL)]; oil; <sup>1</sup>H NMR (400 MHz, CDCl<sub>3</sub>):  $\delta = 7.48$ -7.42 (m, 2 H, Ar-H), 7.30-7.23 (m, 2 H, Ar-H), 3.50 (s, 3 H, CH<sub>3</sub>), 3.22 (s, 3 H, CH<sub>3</sub>), 2.41 (t,  $J = 7.4$  Hz, 2 H, CH<sub>2</sub>), 2.14 (s, 3 H, CH<sub>3</sub>), 1.50-1.30 (m, 4 H, 2 x CH<sub>2</sub>), 0.89 (t,  $J = 7.0$  Hz, 3 H, CH<sub>3</sub>); <sup>13</sup>C NMR (100 MHz, CDCl<sub>3</sub>):  $\delta = 206.2$ , 167.8, 135.1, 131.5, 127.4, 120.9, 101.4, 101.3, 61.1, 33.7, 30.1, 30.0, 22.3, 16.4, 13.9; IR (neat):  $\nu = 2957$ , 2929, 2859, 1942, 1637, 1484, 1458, 1408, 1372, 1183, 1148, 1105, 1076, 1006 cm<sup>-1</sup>; MS (ESI)  $m/z$  (%): 354 (M(<sup>81</sup>Br)+H<sup>+</sup>), 352 (M(<sup>79</sup>Br)+H<sup>+</sup>); HRMS (ESI) calcd for C<sub>17</sub>H<sub>23</sub><sup>79</sup>BrO<sub>2</sub>N [M+H<sup>+</sup>]: 352.0907, found: 352.0906.

**(15) Preparation of (*R*)-3-butyl-5-(4-bromophenyl)-3,4-hexadien-2-one ((*R*)-11) (wj-2-136)**

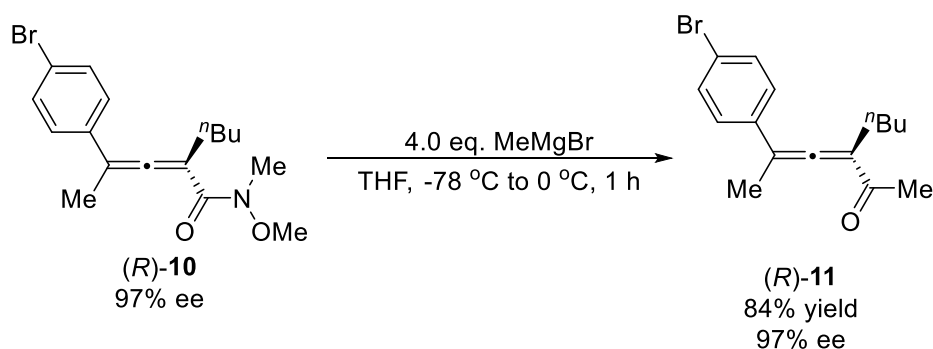

**Typical Procedure IX:** To an oven-dried Schlenk flask were added Weinreb amide (*R*)-10 (70.7 mg, 0.2 mmol, 97% ee) and THF (2 mL) under Ar atmosphere and

cooled to  $-78\text{ }^{\circ}\text{C}$ . Then MeMgBr (0.27 mL, 3.0 M in Et<sub>2</sub>O, 0.8 mmol) was added into the solution dropwise with stirring. The resulting mixture was warmed up to  $0\text{ }^{\circ}\text{C}$  gradually, monitored by TLC, quenched with 2 mL of H<sub>2</sub>O and extracted with ethyl acetate (10 mL x 3). The combined organic layer was washed with brine, dried over anhydrous Na<sub>2</sub>SO<sub>4</sub>, filtered, and concentrated. The residue was purified by chromatography on silica gel to afford the product (*R*)-**11** (51.5 mg, 84%) [eluent: petroleum ether / ethyl acetate = 15/1 (100 mL)]; 97% ee (HPLC conditions: OD-H column, hexane/<sup>i</sup>PrOH = 99.5/0.5, 1.0 mL/min,  $\lambda = 214\text{ nm}$ ,  $t_R$  (major) = 6.3 min,  $t_R$  (minor) = 7.4 min);  $[\alpha]_D^{23} = -16.0$  ( $c = 1.20$ , CHCl<sub>3</sub>); oil; <sup>1</sup>H NMR (400 MHz, CDCl<sub>3</sub>):  $\delta = 7.48$  (dt,  $J_1 = 8.4\text{ Hz}$ ,  $J_2 = 2.2\text{ Hz}$ , 2 H, Ar-H), 7.29-7.21 (m, 2 H, Ar-H), 2.30 (t,  $J = 7.4\text{ Hz}$ , 2 H, CH<sub>2</sub>), 2.24 (s, 3 H, CH<sub>3</sub>), 2.21 (s, 3 H, CH<sub>3</sub>), 1.45-1.28 (m, 4 H, 2 x CH<sub>2</sub>), 0.88 (t,  $J = 7.0\text{ Hz}$ , 3 H, CH<sub>3</sub>); <sup>13</sup>C NMR (100 MHz, CDCl<sub>3</sub>):  $\delta = 213.6$ , 198.5, 134.0, 131.8, 127.2, 121.5, 111.7, 104.2, 30.1, 27.3, 26.6, 22.4, 16.3, 13.8; IR (neat):  $\nu = 2956$ , 2926, 2859, 1931, 1678, 1486, 1461, 1355, 1228, 1117, 1075, 1007 cm<sup>-1</sup>; MS (70 eV, EI)  $m/z$  (%): 308 (M(<sup>81</sup>Br)<sup>+</sup>, 6.39), 306 (M(<sup>79</sup>Br)<sup>+</sup>, 6.71), 263 (100); HRMS (EI) calcd for C<sub>16</sub>H<sub>19</sub><sup>79</sup>BrO [M<sup>+</sup>]: 306.0614, found: 306.0617.

**(16) Preparation of 3-butyl-5-(4-bromophenyl)-3,4-hexadien-2-one (*rac*-11) (wj-2-135)**

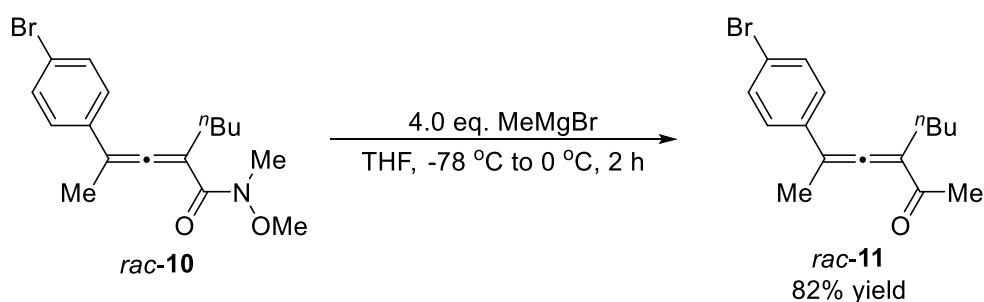

Following Typical Procedure IX: the reaction of Weinreb amide *rac*-**10** (70.6 mg, 0.2 mmol), THF (2 mL) and MeMgBr (0.27 mL, 3.0 M in Et<sub>2</sub>O, 0.8 mmol) afforded the product *rac*-**11** (50.4 mg, 82%) [eluent: petroleum ether / ethyl acetate = 15/1 (100 mL)]; oil; <sup>1</sup>H NMR (400 MHz, CDCl<sub>3</sub>):  $\delta = 7.49$  (dt,  $J_1 = 8.8\text{ Hz}$ ,  $J_1 = 2.2\text{ Hz}$ , 2 H, Ar-H), 7.28-7.21 (m, 2 H, Ar-H), 2.3 (t,  $J = 7.4\text{ Hz}$ , 2 H, CH<sub>2</sub>), 2.24 (s, 3 H, CH<sub>3</sub>), 2.21 (s, 3 H,

CH<sub>3</sub>), 1.45-1.28 (m, 4 H, 2 x CH<sub>2</sub>), 0.88 (t, *J* = 7.0 Hz, 3 H, CH<sub>3</sub>); **<sup>13</sup>C NMR** (100 MHz, CDCl<sub>3</sub>): δ = 213.6, 198.5, 134.0, 131.8, 127.2, 121.5, 111.7, 104.2, 30.1, 27.3, 26.6, 22.4, 16.3, 13.9; **IR** (neat): ν = 2956, 2926, 2860, 1931, 1678, 1486, 1461, 1355, 1228, 1117, 1075, 1007 cm<sup>-1</sup>; **MS** (70 eV, EI) *m/z* (%): 308 (M(<sup>81</sup>Br)<sup>+</sup>, 5.44), 306 (M(<sup>79</sup>Br)<sup>+</sup>, 5.66), 263 (100); **HRMS** (EI) calcd for C<sub>16</sub>H<sub>19</sub><sup>79</sup>BrO [M<sup>+</sup>]: 306.0614, found: 306.0618.

## Monitoring Experiment<sup>4</sup>

<sup>1</sup>H NMR Monitoring Experiment of the kinetic resolution reaction (wj-3-121)

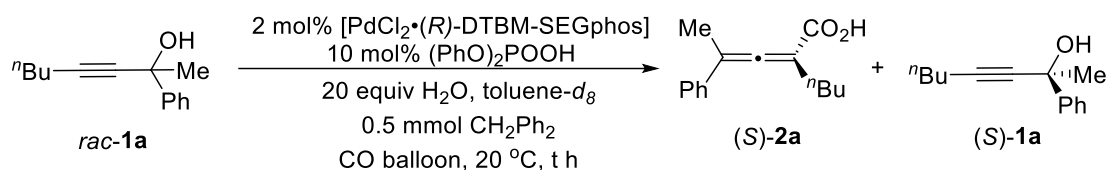

To a Schlenk tube (25 mL) were added [PdCl<sub>2</sub>•(*R*)-DTBM-SEGphos] (27.2 mg, 0.02 mmol), (PhO)<sub>2</sub>PO<sub>2</sub>H (24.9 mg, 0.1 mmol). After addition, the flask was degassed and refilled with Ar for three times to ensure the complete exclusion of air. Then *rac*-**1a** (202.4 mg, 1 mmol)/toluene-*d*<sub>8</sub> (3 mL), H<sub>2</sub>O (360 μL, *d* = 1.0 g/mL, 360.0 mg, 20 mmol)/toluene-*d*<sub>8</sub> (2 mL) and CH<sub>2</sub>Ph<sub>2</sub> (83.6 μL, *d* = 1.006 g/mL, 84.1 mg, 0.5 mmol) were added sequentially under argon. After that, the Ar gas line was closed. The resulting mixture was then frozen with a liquid nitrogen bath, degassed to remove the argon inside completely, and refilled with CO by a balloon of CO (about 1 L) for three times. Then the liquid nitrogen bath was removed and the mixture was allowed to stand until completely thawed, vigorously stirred at 20 °C with a balloon of CO. 0.2 mL each of the aliquot was taken with an Ar-purged syringes after 4 h, 8 h, 12 h, 16 h, 20 h. Then the mixture was analyzed by <sup>1</sup>H NMR spectra with CH<sub>2</sub>Ph<sub>2</sub> as the internal standard to determine the yield of *(S)*-**2a** and the recoveries of **1a**. The residues were purification by the preparative TLC (petroleum ether / ethyl acetate = 5/1) and the ee value were determined by HPLC analysis. And the data acquired were analyzed by Origin 9.

**Supplementary Table 1. <sup>1</sup>H NMR Monitoring Experiment of the kinetic resolution reaction**

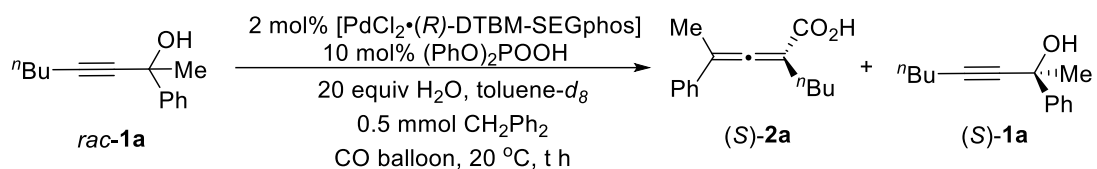

| entry | time / h | NMR yield of ( <i>S</i> )- <b>2a</b> ,<br>ee of ( <i>S</i> )- <b>2a</b> / % | Recovery of <b>1a</b> ,<br>ee of <b>1a</b> / % |
|-------|----------|-----------------------------------------------------------------------------|------------------------------------------------|
| 1     | 4        | 14, 91                                                                      | 86, 12                                         |
| 2     | 8        | 38, 90                                                                      | 61, 53                                         |
| 3     | 12       | 56, 76                                                                      | 40, 98                                         |
| 4     | 16       | 61, 62                                                                      | 32, 98                                         |
| 5     | 20       | 65, 55                                                                      | 27, 99                                         |

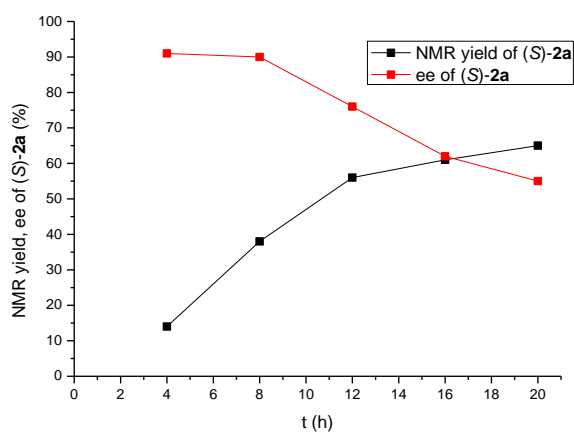

**Supplementary Figure 2. The effect in the formation of (*S*)-**2a** via the kinetic resolution reaction.**

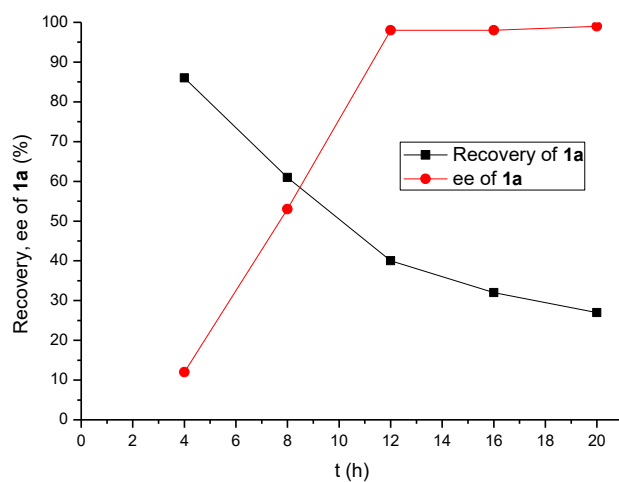

**Supplementary Figure 3. The effect in the recoveries of **1a** via the kinetic resolution reaction.**

## SAESI-MS studies<sup>14</sup>

### SAESI-MS conditions

SAESI-MS spectra were recorded on a Thermo TSQ Quantum Access triple-quadrupole mass spectrometer (Thermo Fisher Scientific, Waltham, MA) equipped with a home-made SAESI ion source in positive mode. The basic SAESI conditions were: vacuum,  $2.8 \times 10^{-6}$  torr; spray voltage, 4000 V; capillary temperature, 275 °C; sheath gas pressure of two sprayers, 3 arb. units; the collision energy of CID, 20 eV. Data acquisition and analysis were done with the Xcalibur (version 2.0, Thermo Fisher Scientific) software package.

In solvent-assisted electrospray ionization mass spectrometric experiment, the angle ( $\alpha$ ) between the two sprayers is 45° and the distance (b) between the tip of sprayers and the inlet to the mass is 6 mm. The chemical solutions were injected by a 500- $\mu$ L air-tight syringe with a speed at 5  $\mu$ L/min to SAESI-MS. The assisted solvent of methanol was injected by another 500- $\mu$ L air-tight syringe with a speed at 5  $\mu$ L/min. SAESI-MS device.

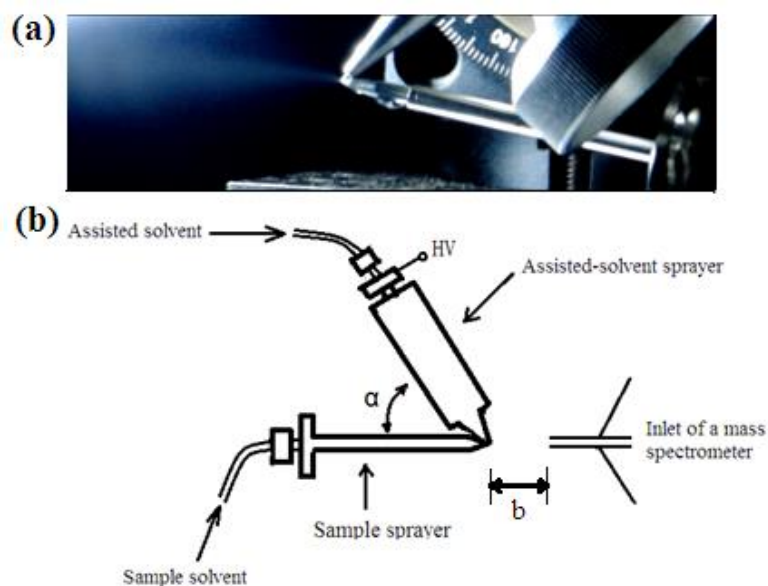

**Supplementary Figure 4. (a) Photographic image of SAESI apparatus. (b) Schematic representation of the SAESI. The angle ( $\alpha$ ) between the two sprayers is 45° and the distance (b) between the tip of sprayers and the inlet to the mass is 6 mm.**



## References:

1. Zhang, W.; Ma, S. *Chem. Commun.* **2018**, *54*, 6064-6067.
2. Zheng, W.-F.; Zhang, W.; Huang, J.; Yu, Y.; Qian, H.; Ma, S. *Org. Chem. Front.* **2018**, *5*, 1900-1904.
3. Wang, J.; Zhang, W.; Wu, P.; Huang, C.; Zheng, Y.; Zheng, W.-F.; Qian, H.; Ma, S. *Org. Chem. Front.* **2020**, *7*, 3907-3911.
4. Zheng, W.-F.; Zhang, W.; Huang, C.; Wu, P.; Qian, H.; Wang, L.; Guo, Y.-L.; Ma, S. *Nat. Catal.* **2019**, *2*, 997-1005.
5. Song, S.; Zhou, J.; Fu, C.; Ma, S. *Nat. Commun.* **2019**, *10*, 507-515.
6. Wang, W.; Qian, H.; Ma, S. *Chin. J. Chem.* **2020**, *38*, 331-345.
7. (a) Ueda, T.; Tanaka, K.; Ichibakase, T.; Orito, Y.; Nakajima, M. *Tetrahedron* **2010**, *66*, 7726-7731. (b) Zhang, W.; Ma, S. *Chem. Commun.* **2018**, *54*, 6064-6067.
8. Laserna V.; Rojas C. J.; Sheppard T. D. *Org. Lett.* **2019**, *21*, 4443-4447.
9. Moure A. L.; Arrayás R. G.; Cárdenas D. J.; Alonso I.; Carretero J. C. *J. Am. Chem. Soc.* **2012**, *134*, 7219-7222.
10. Ma, S.; Yu, Z.; Wu, S. *Tetrahedron*, **2001**, *57*, 1585-1588.
11. Miyaura, N.; Yanagi, T.; Suzuki, A. *Synth. Commun.* **1981**, *11*, 513-519.
12. Ma, S.; Yu, Z. *J. Org. Chem.* **2003**, *68*, 6149-6152.
13. Melnykov, K. P.; Granat, D. S.; Volochnyuk, D. M.; Ryabukhin, S. V.; Grygorenko O. O. *Synthesis* **2018**, *50*, 4949-4957.
14. Zhang, J.-T.; Wang, H.-Y.; Zhu, W. Cai; T.-T. Guo, Y.-L. *Anal. Chem.* **2014**, *86*, 8937-8942.

ZWf-6-135-H  
Jun 25 2019  
SOLVENT: CDCl3  
NA = 4  
F1 = 400.130005 MHz  
F2 = 1.000000 MHz

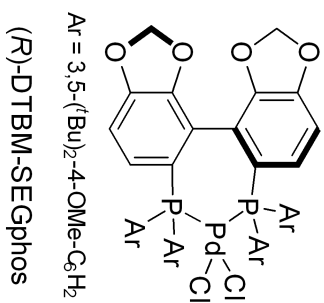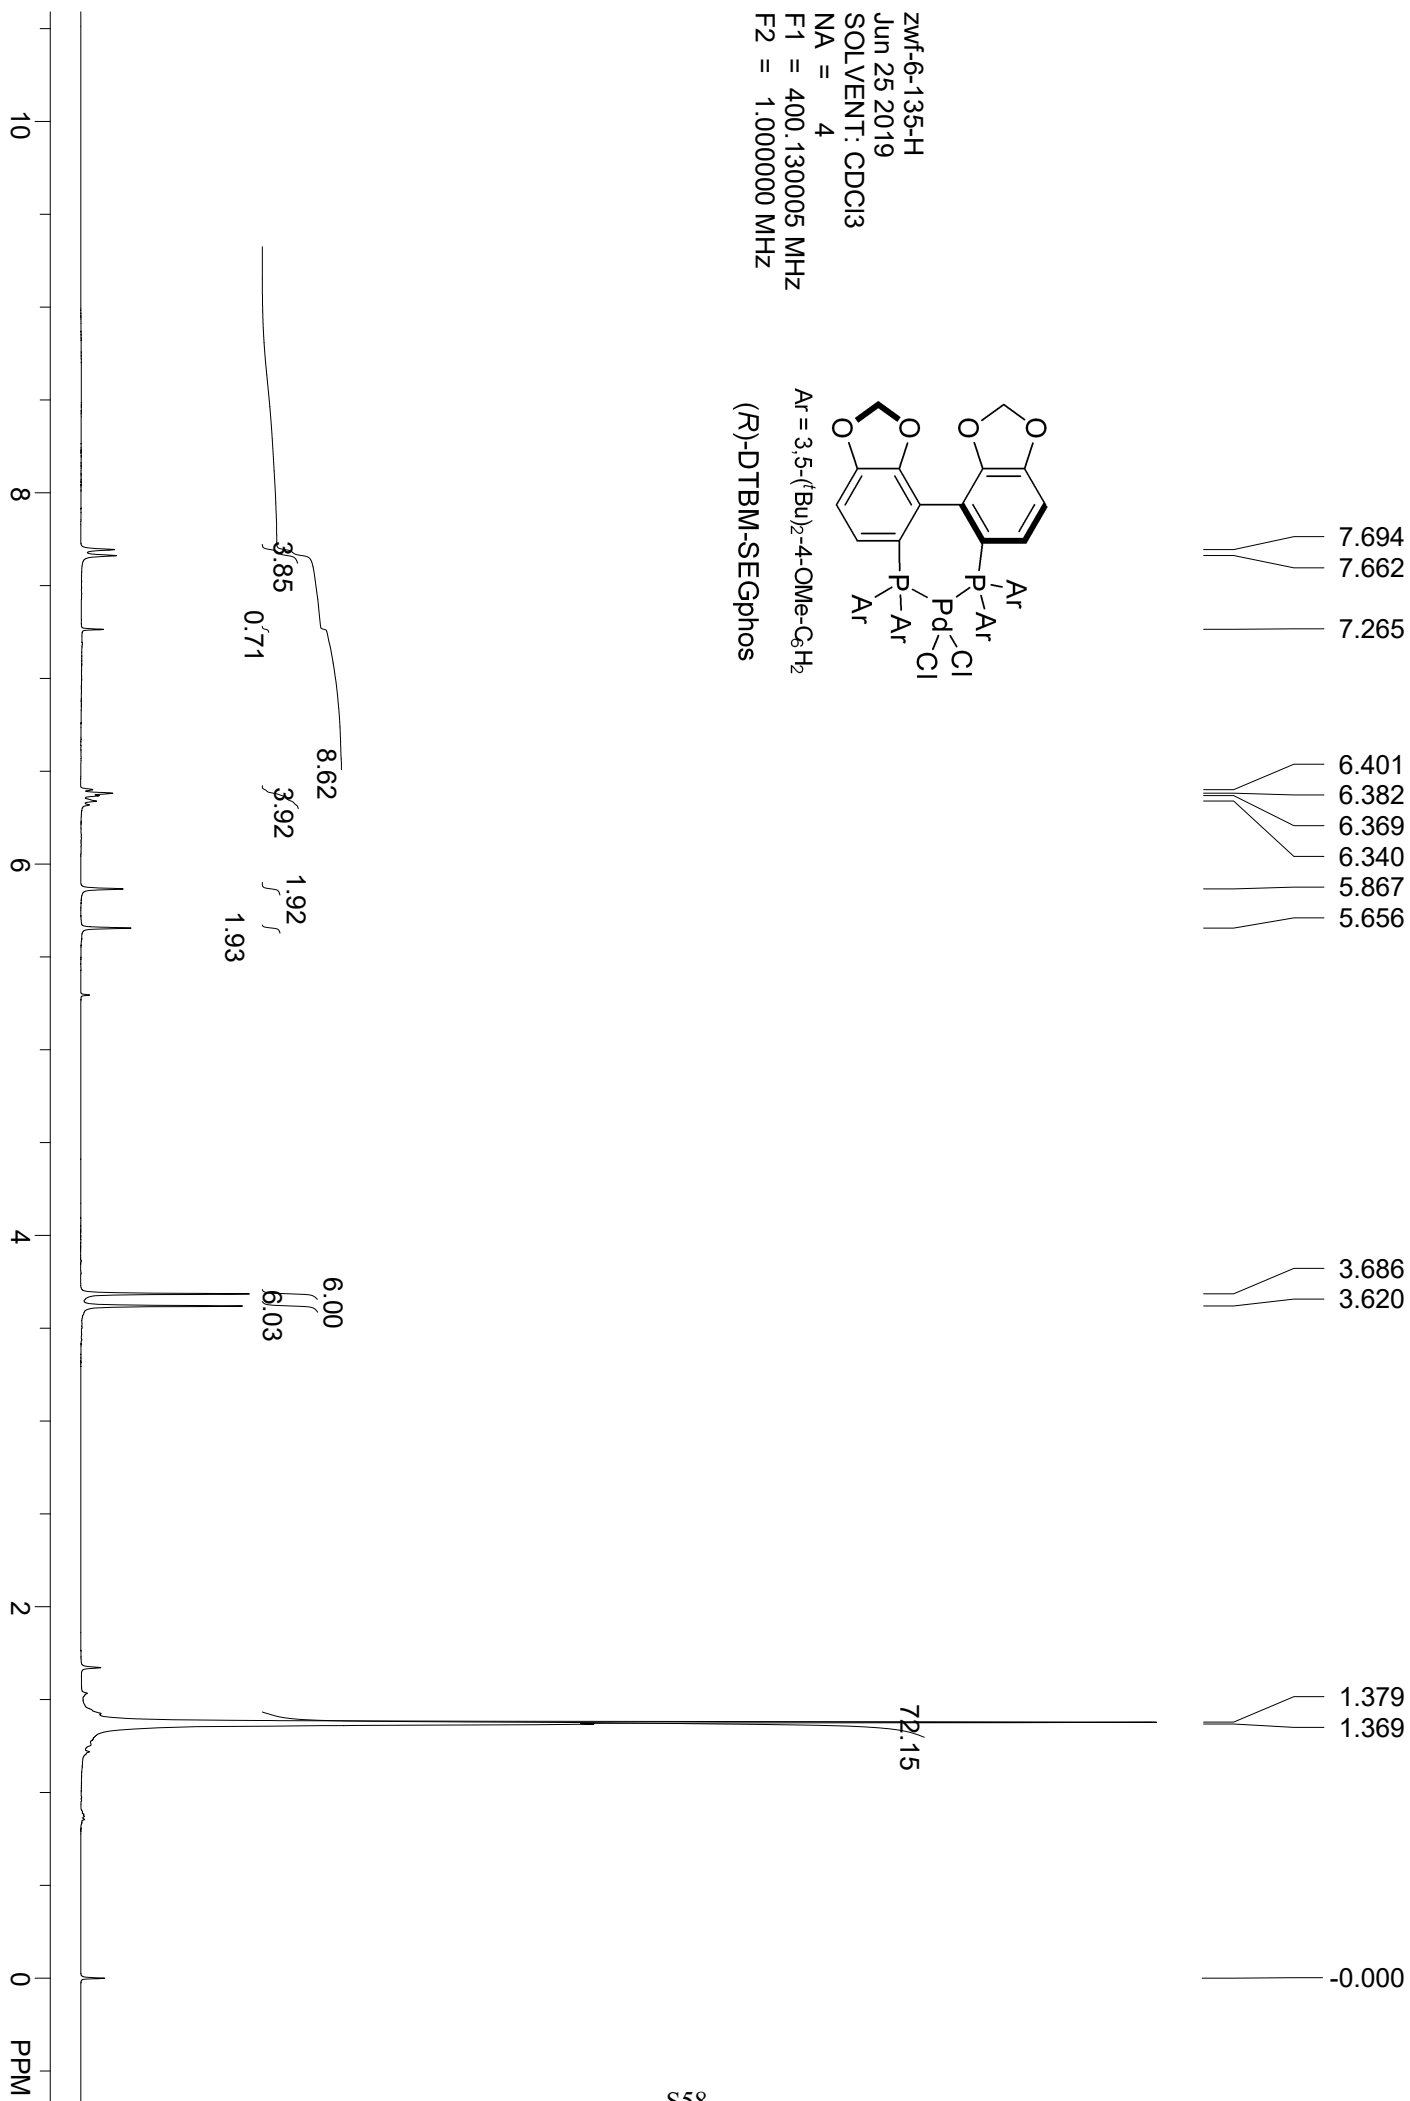

ZWF-6-135-C  
Jun 25 2019  
SOLVENT: CDCl3  
NA = 2500  
F1 = 100.612770 MHz  
F2 = 1.000000 MHz

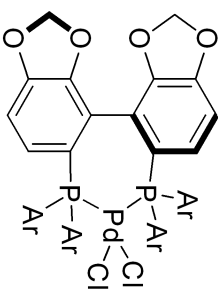

Ar = 3,5-(tBu)<sub>2</sub>-4-OMe-C<sub>6</sub>H<sub>2</sub>  
*(R)*-DTBM-SEGphos

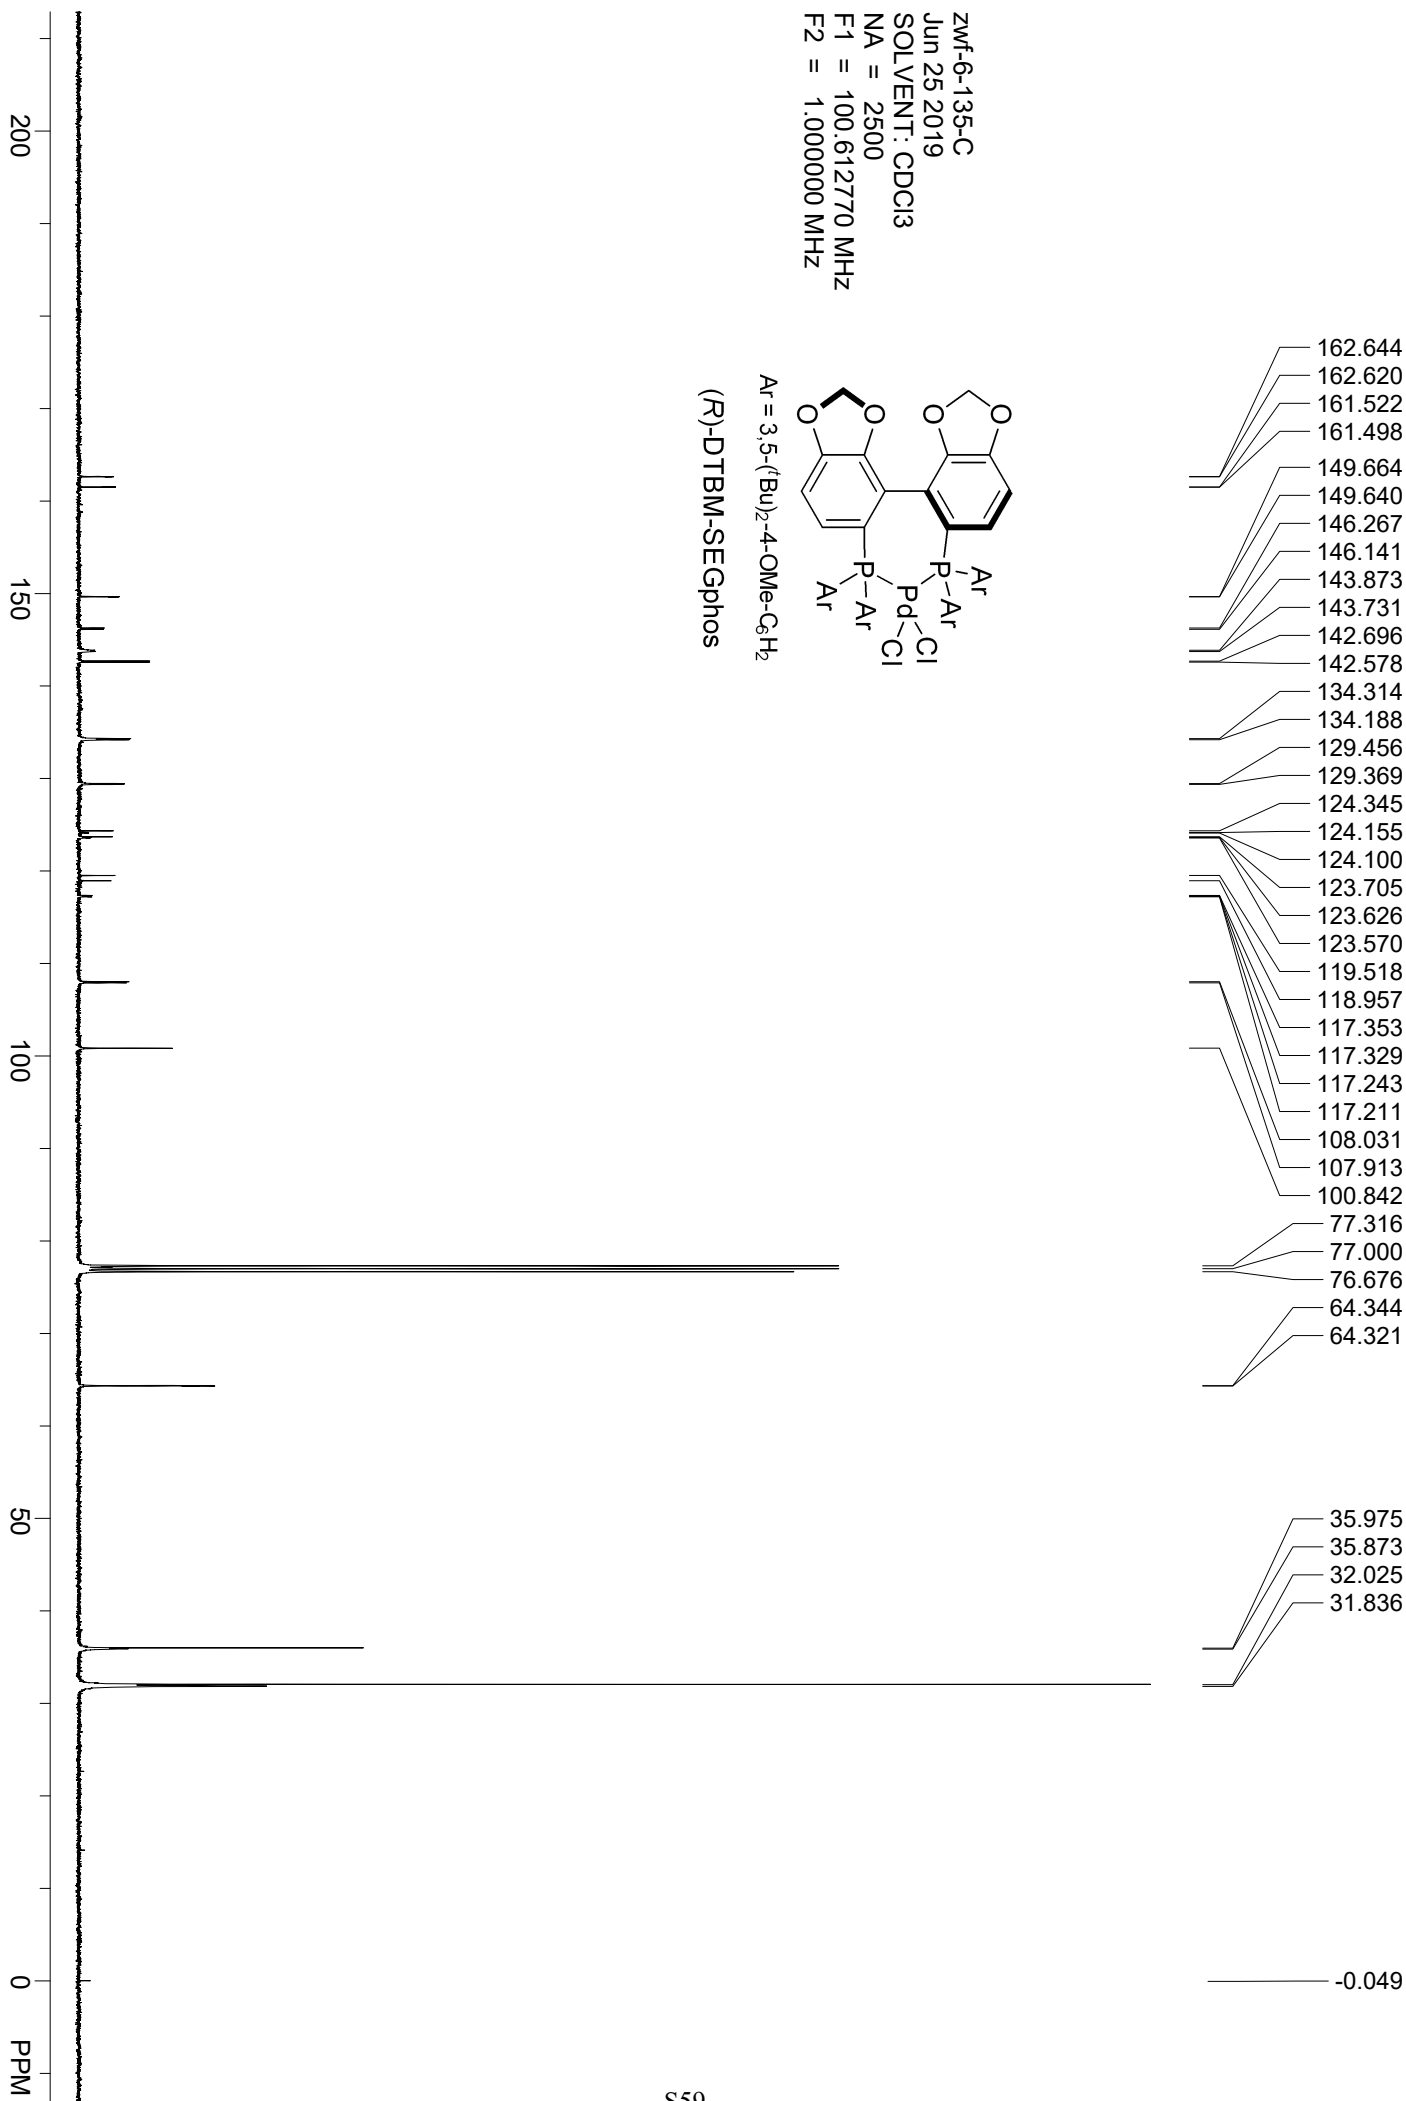

29.078

Zwf-6-135-P  
Jun 25 2019  
SOLVENT: CDCl3  
NA = 16  
F1 = 161.975586 MHz  
F2 = 1.000000 MHz

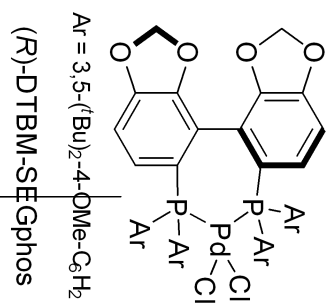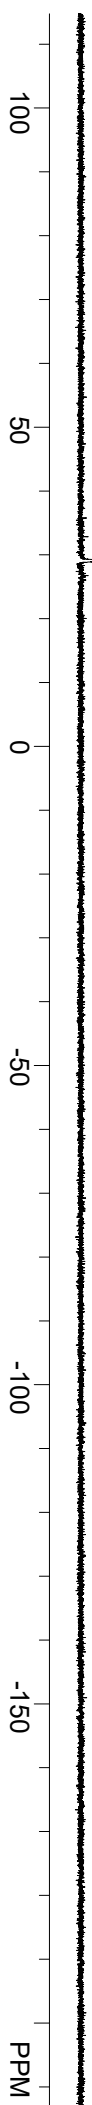

zwf-7-124-H  
Oct 27 2019  
SOLVENT: CDCl3  
NA = 4  
F1 = 400.130005 MHz  
F2 = 1.000000 MHz

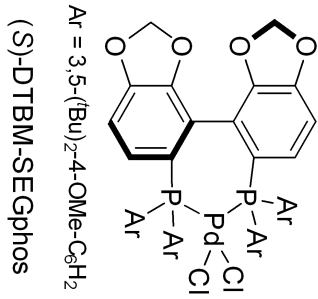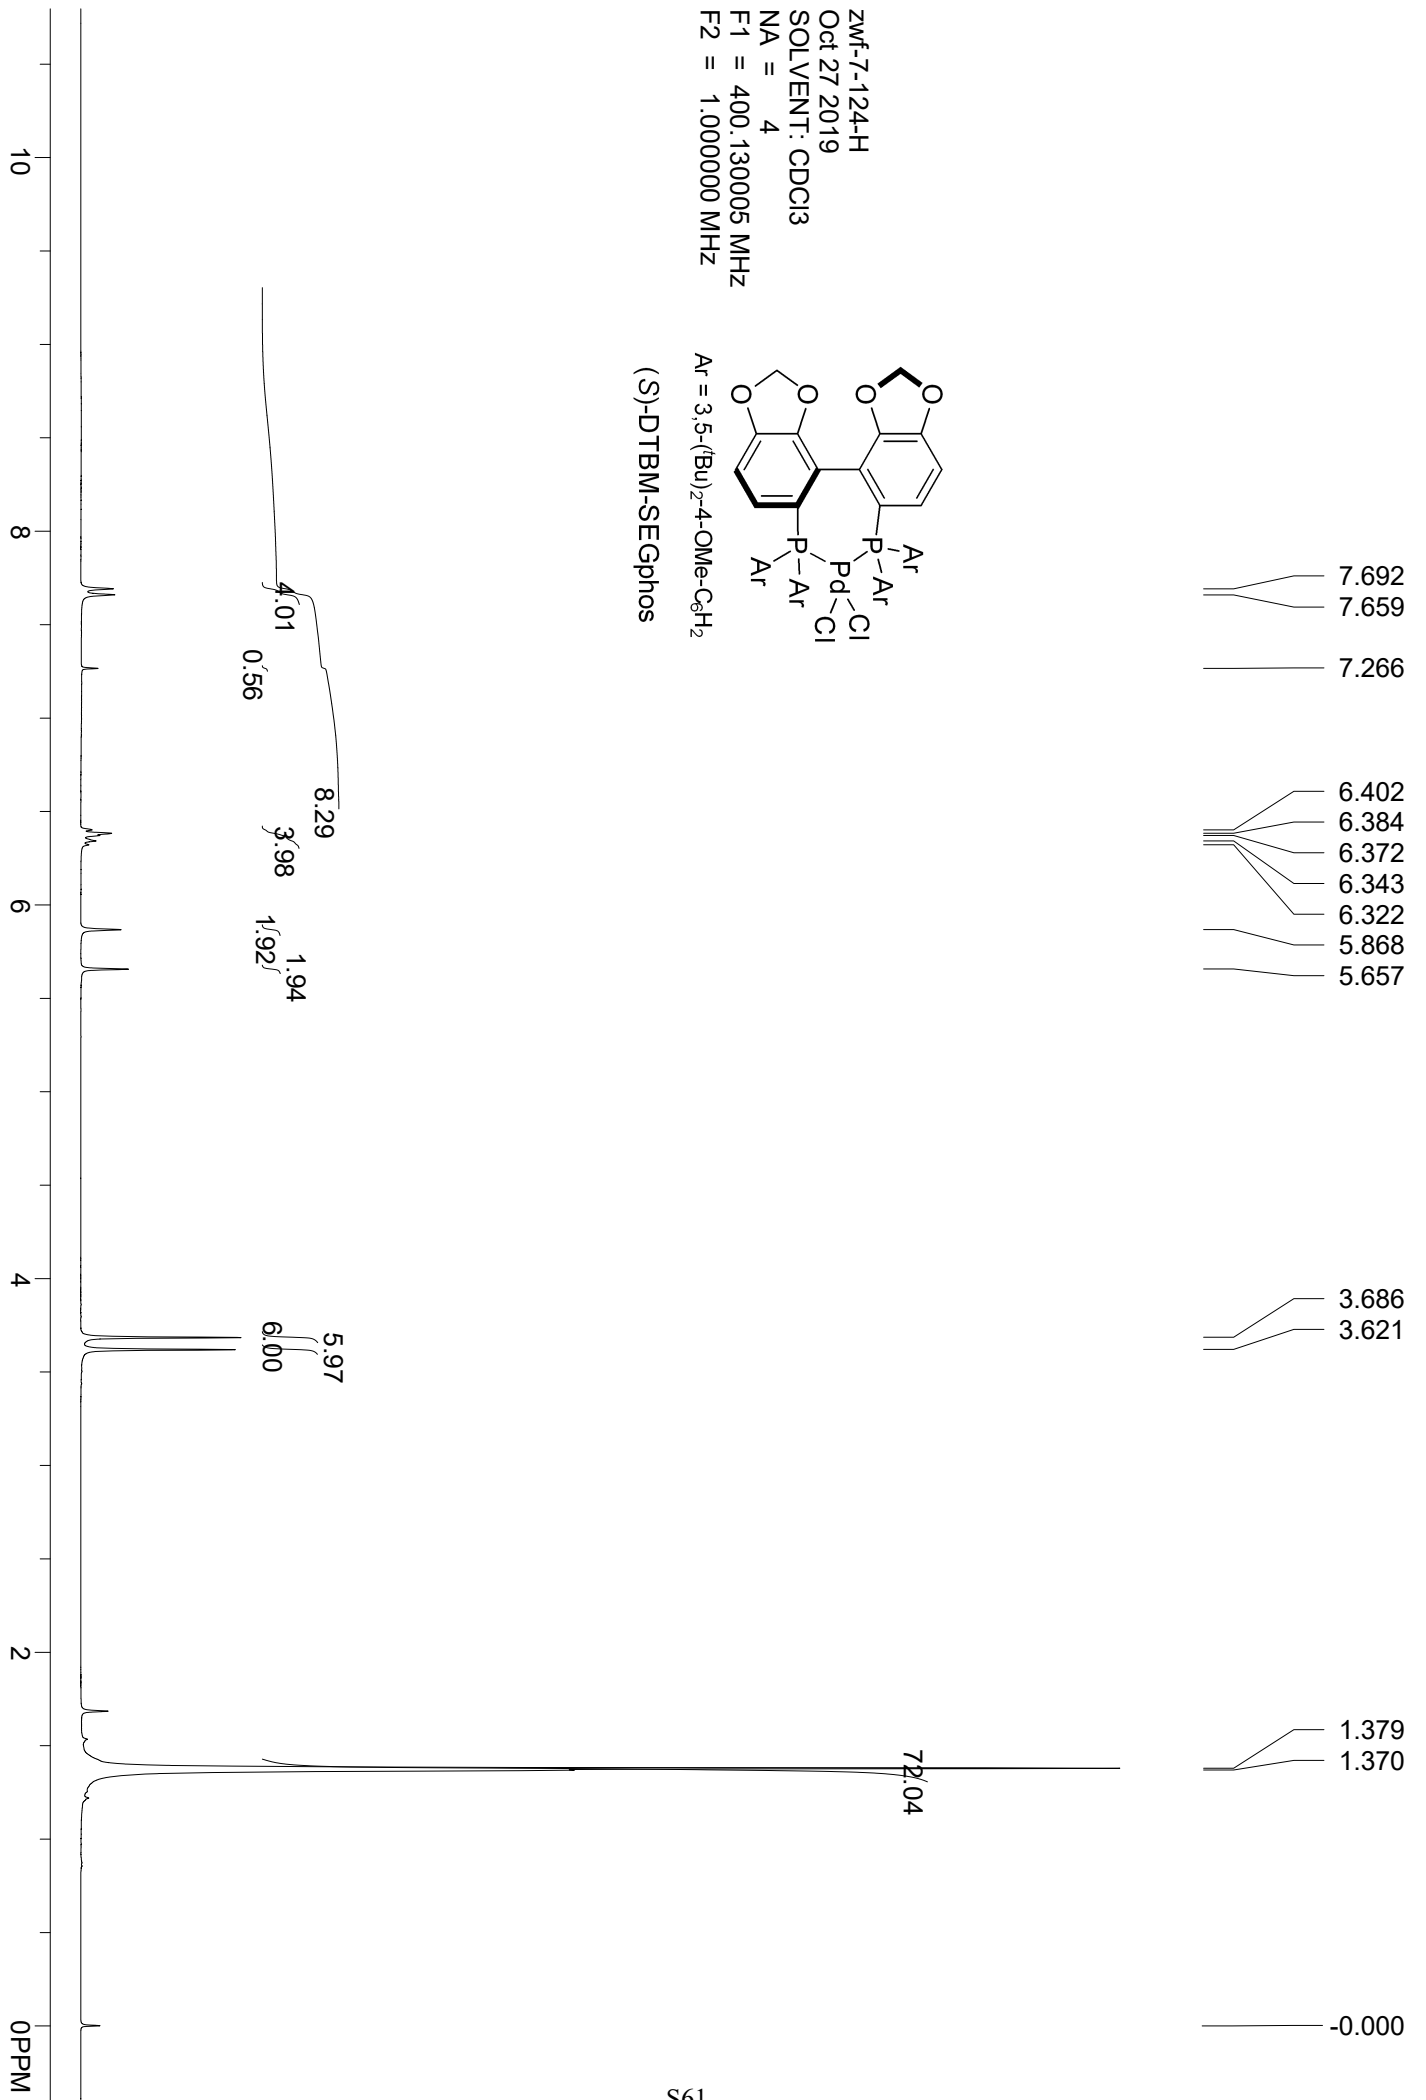

zwf-7-124-C  
Oct 27 2019  
SOLVENT: CDCl3  
NA = 2500  
F1 = 100.612770 MHz  
F2 = 1.000000 MHz

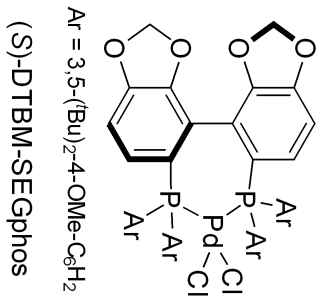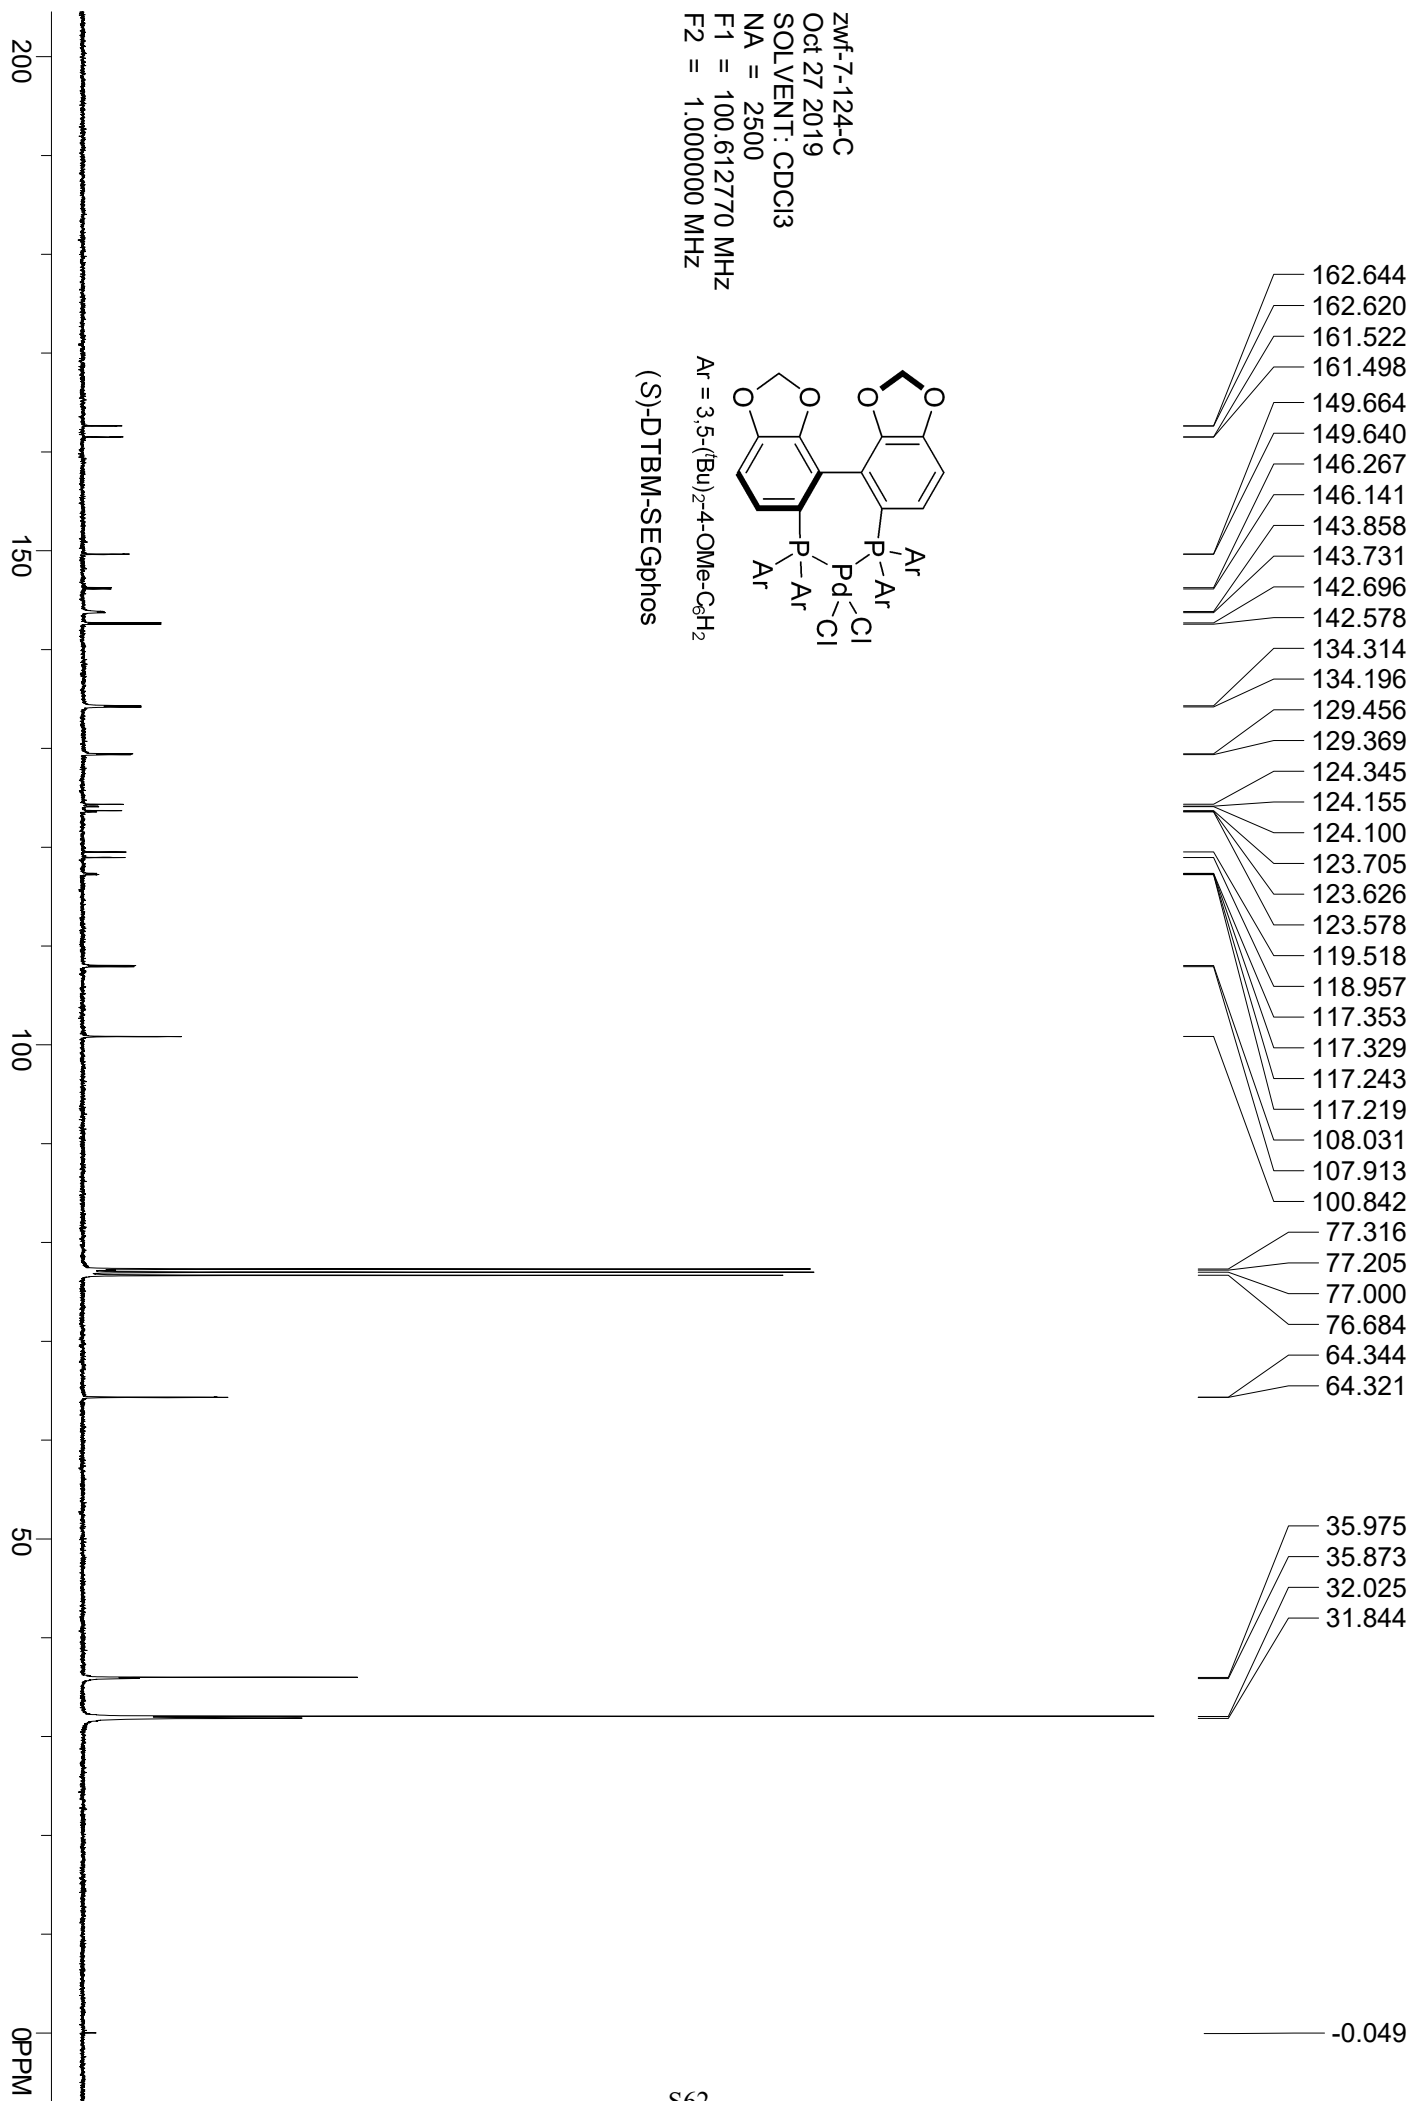

29.024

ZWF-7-124-P  
Oct 27 2019  
SOLVENT: CDCl3  
NA = 16  
F1 = 161.967499 MHz  
F2 = 1.000000 MHz

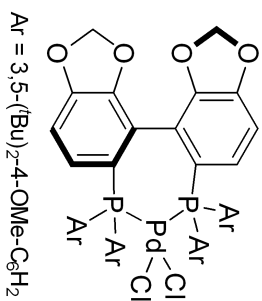

(S)-DTBM-SEGphos

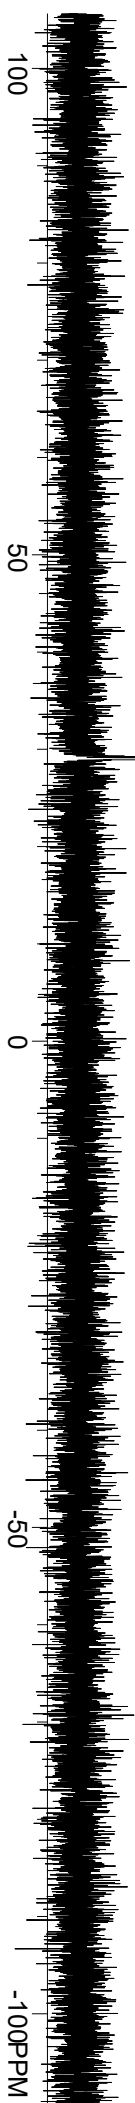

7.660  
7.641  
7.363  
7.345  
7.325  
7.286  
7.268  
7.250

2.395  
2.373  
2.290  
2.273  
2.255  
1.736  
1.571  
1.555  
1.535  
1.517  
1.499  
1.478  
1.460  
1.441  
1.422  
1.404  
1.387  
0.942  
0.924  
0.906  
-0.000

wf-1-015-1-H  
Jul 12 2019  
SOLVENT: CDCl3  
NA = 4  
F1 = 400.130005 MHz  
F2 = 1.000000 MHz

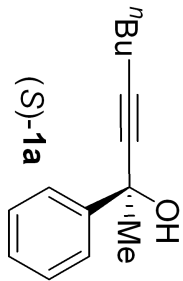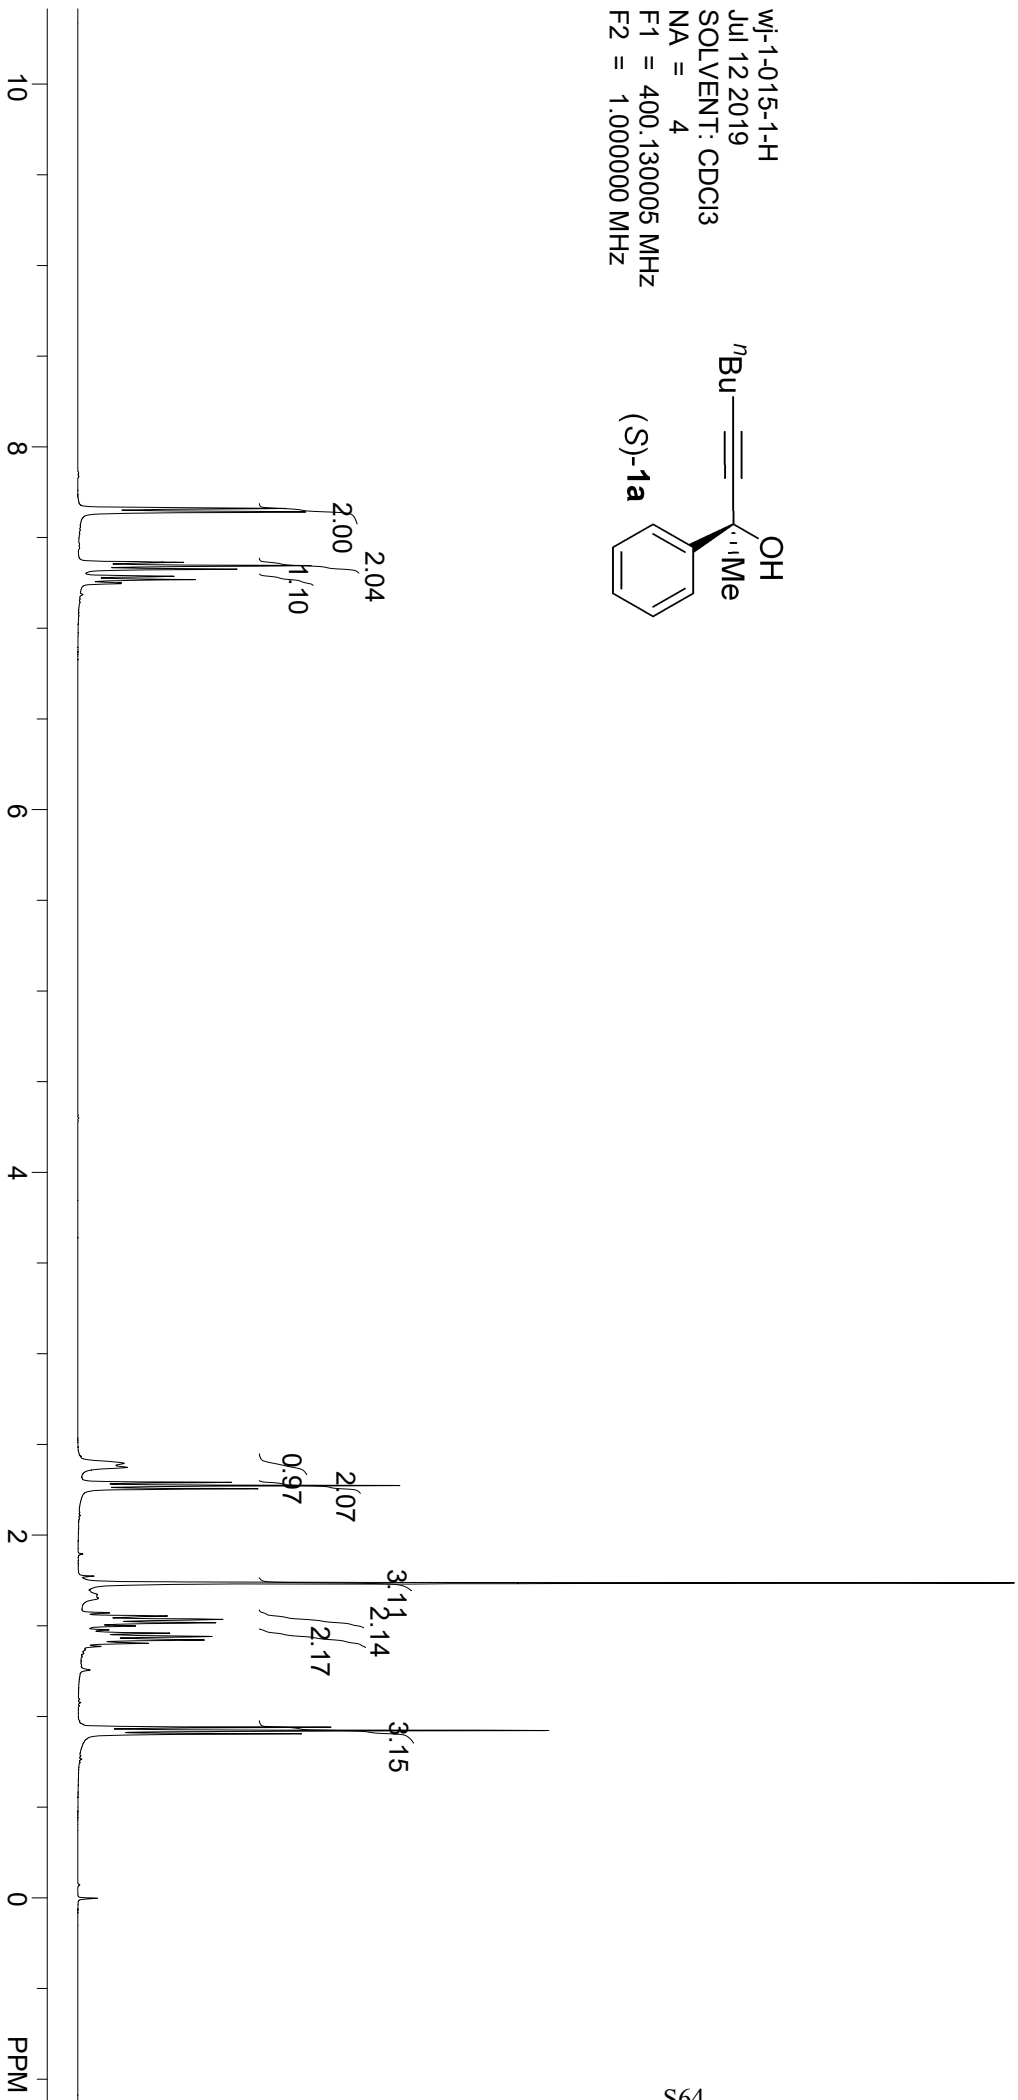



wj-1-015-1-C  
Jul 12 2019  
SOLVENT: CDCl3  
NA = 150  
F1 = 100.612770 MHz  
F2 = 1.000000 MHz

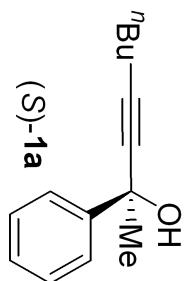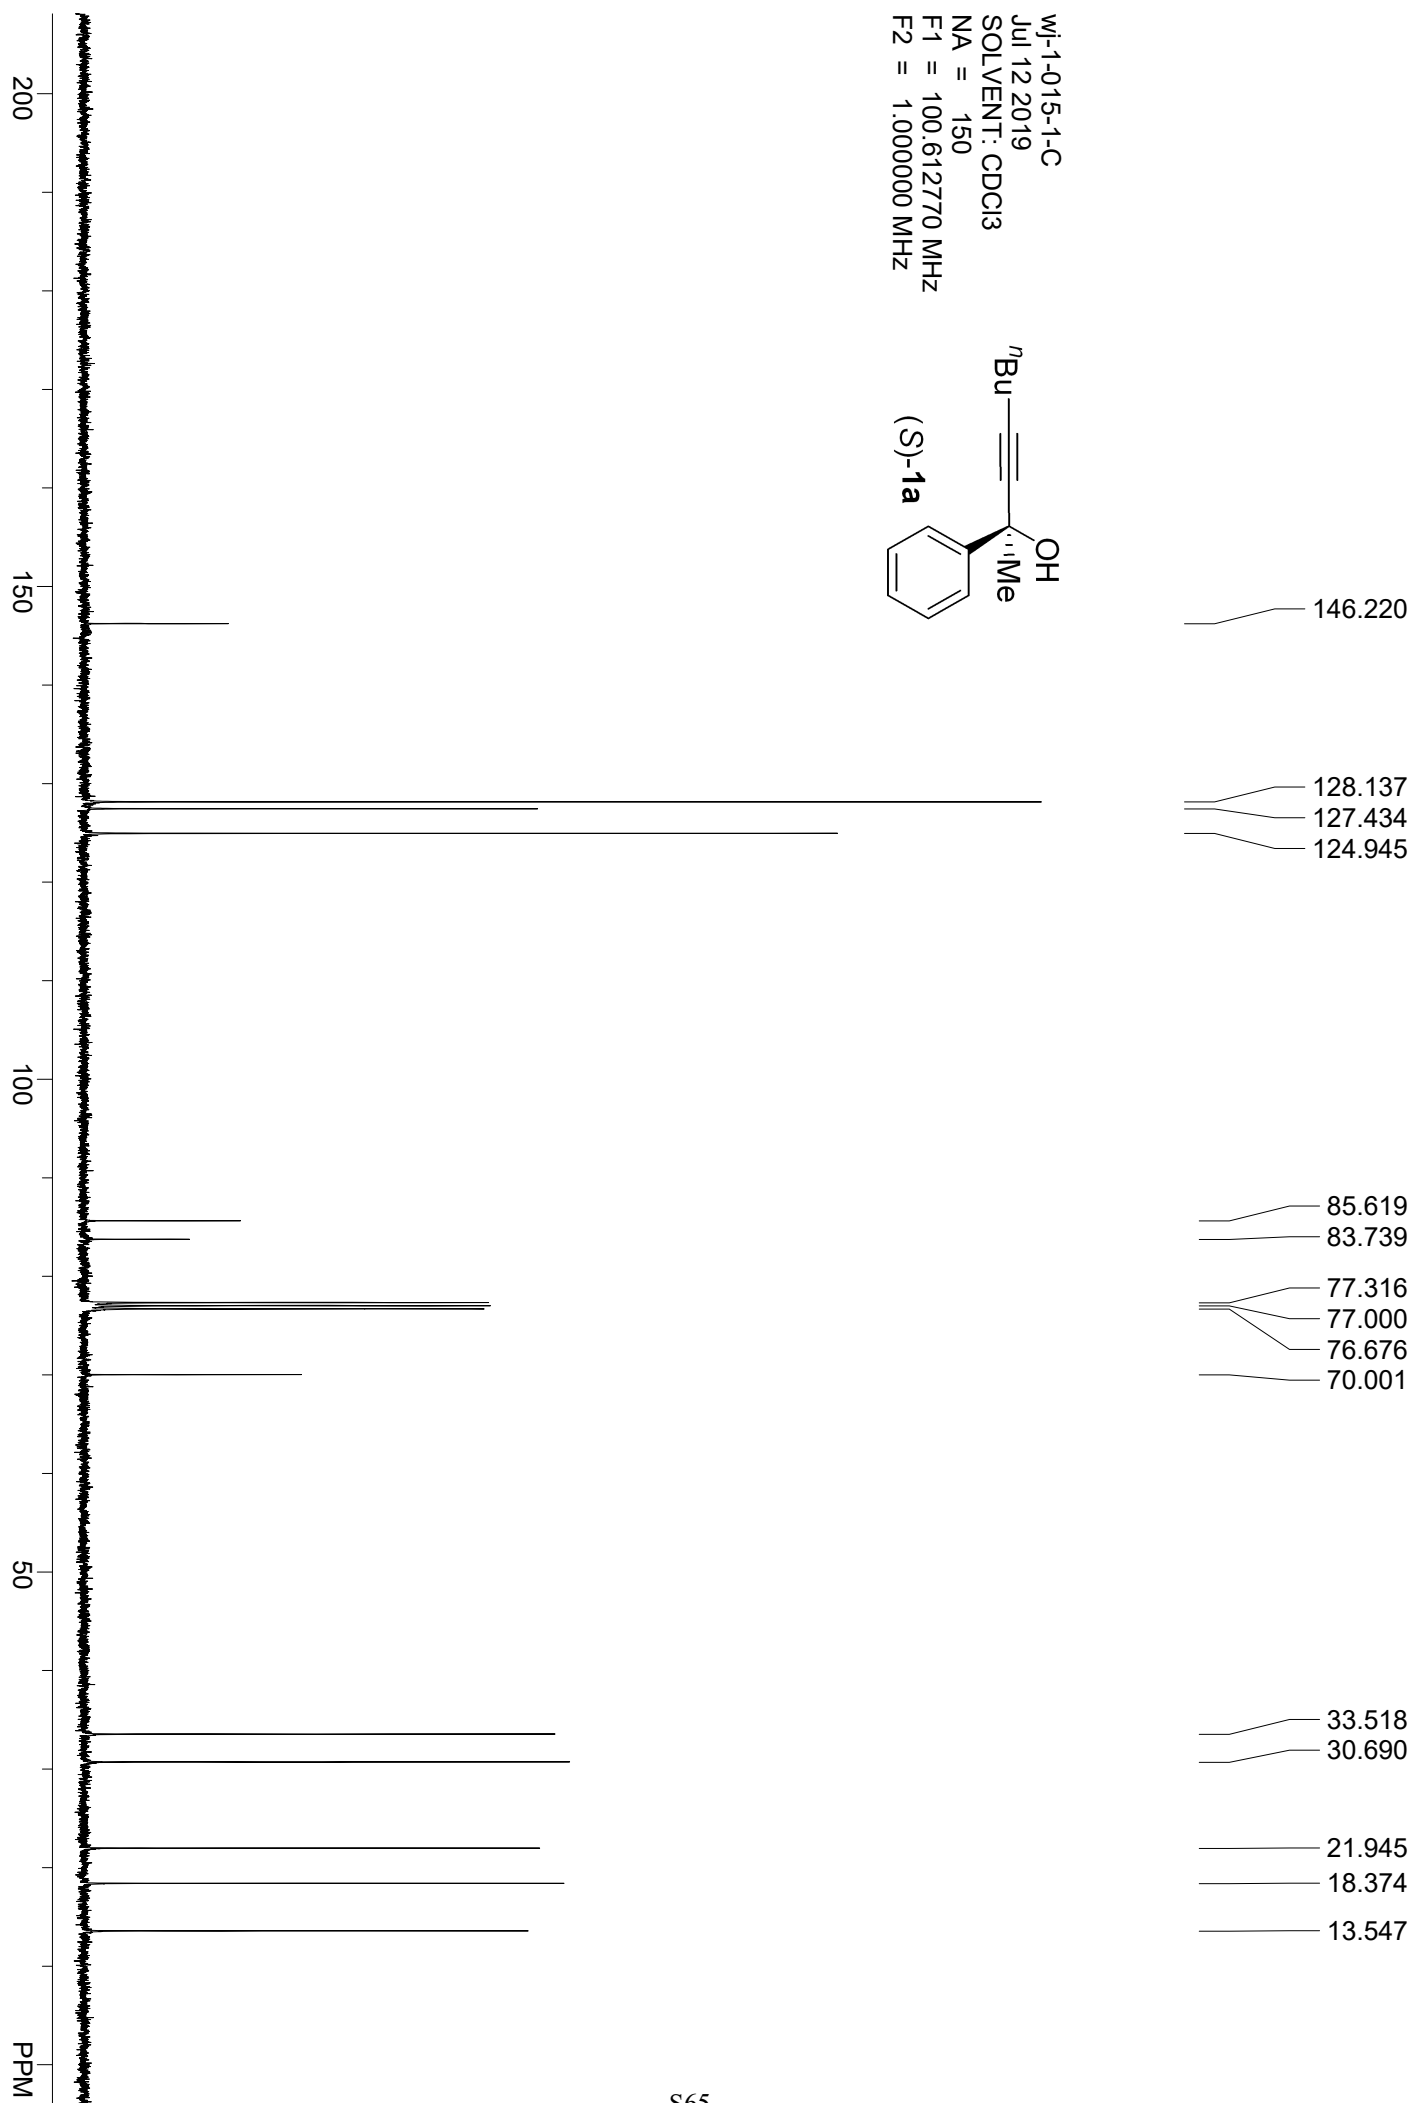

# Area Percent Report

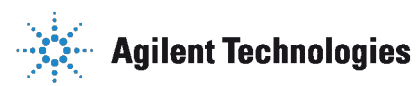

sample wj-1-015-1-AS-H-98-2-1.0-214

Data file: C:\Users\Public\Documents\ChemStation\1\Data\WJ\_LC 2019-07-12 22-04-29\003-P2-C1-wj-1-015-1.D

## Acquisition Data:

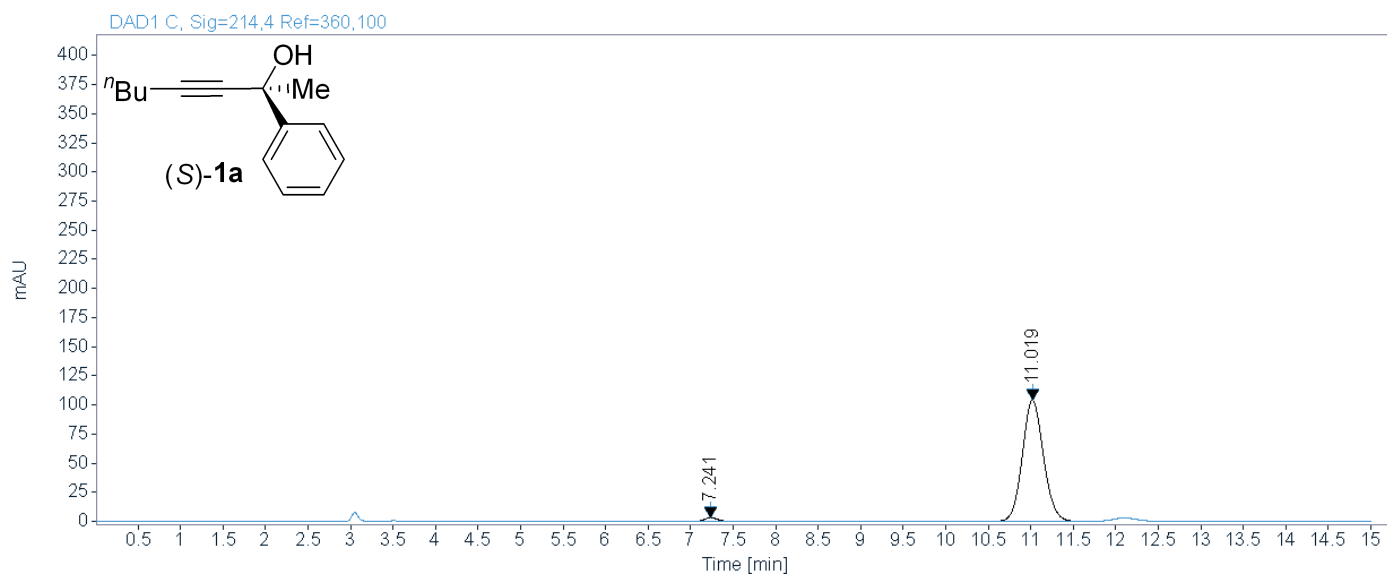

Signal: DAD1 C, Sig=214,4 Ref=360,100

| RT [min] | Width [min] | Height   | Area      | Area%    |
|----------|-------------|----------|-----------|----------|
| 7.241    | 0.1632      | 3.1758   | 34.0856   | 1.8496   |
| 11.019   | 0.2683      | 104.3075 | 1808.7644 | 98.1504  |
| Sum      |             |          | 1842.8500 | 100.0000 |

# Area Percent Report

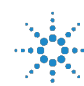

Agilent Technologies

sample wj-1-015-1-rac-AS-H-98-2-1.0-214

Data file: C:\Users\Public\Documents\ChemStation\1\Data\WJ\_LC 2019-07-12 22-04-29\004-P2-C2-wj-1-015-1-rac.D

## Acquisition Data:

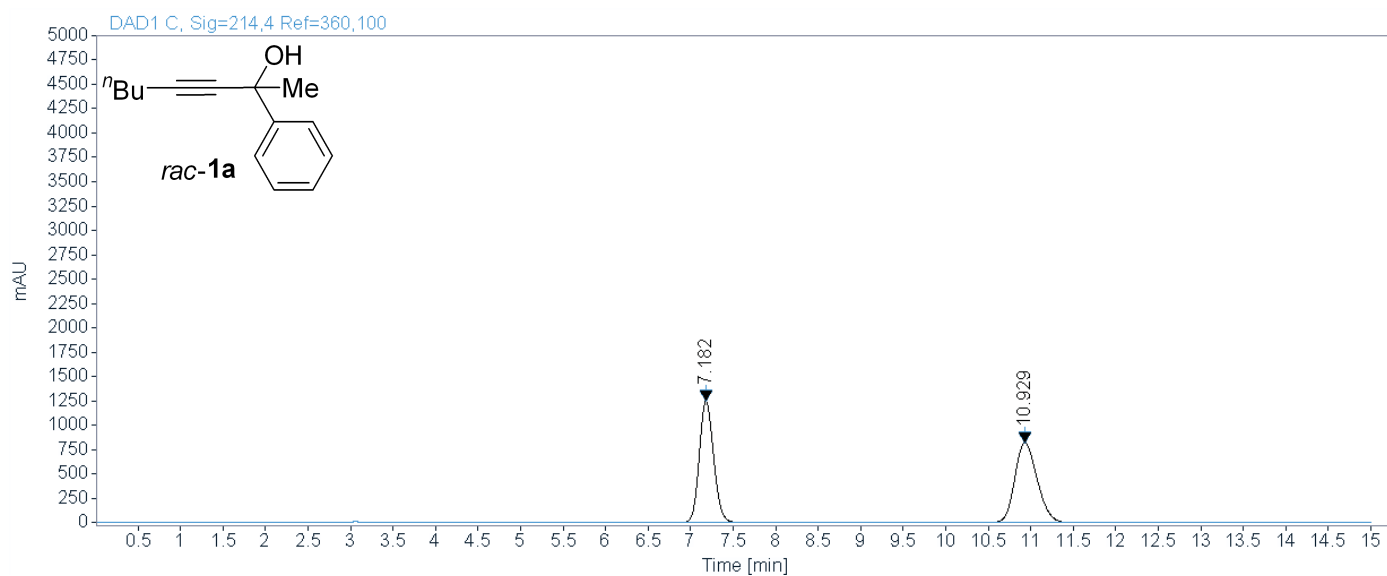

Signal: DAD1 C, Sig=214,4 Ref=360,100

| RT [min] | Width [min] | Height    | Area       | Area%    |
|----------|-------------|-----------|------------|----------|
| 7.182    | 0.1838      | 1251.3541 | 14780.0400 | 49.4825  |
| 10.929   | 0.2866      | 820.3699  | 15089.1592 | 50.5175  |
|          |             | Sum       | 29869.1992 | 100.0000 |

wj-1-017-1-H  
Jul 13 2019  
SOLVENT: CDCl3  
NA = 4  
F1 = 400.130035 MHz  
F2 = 1.000000 MHz

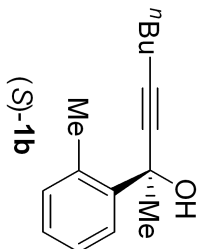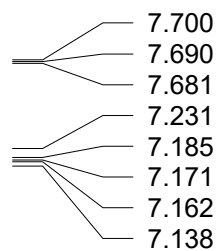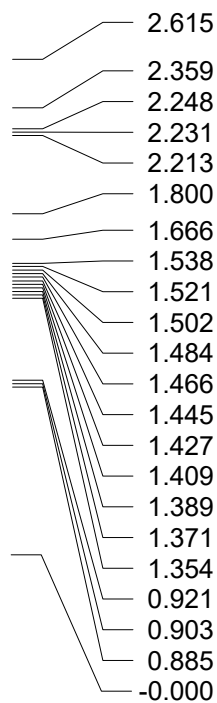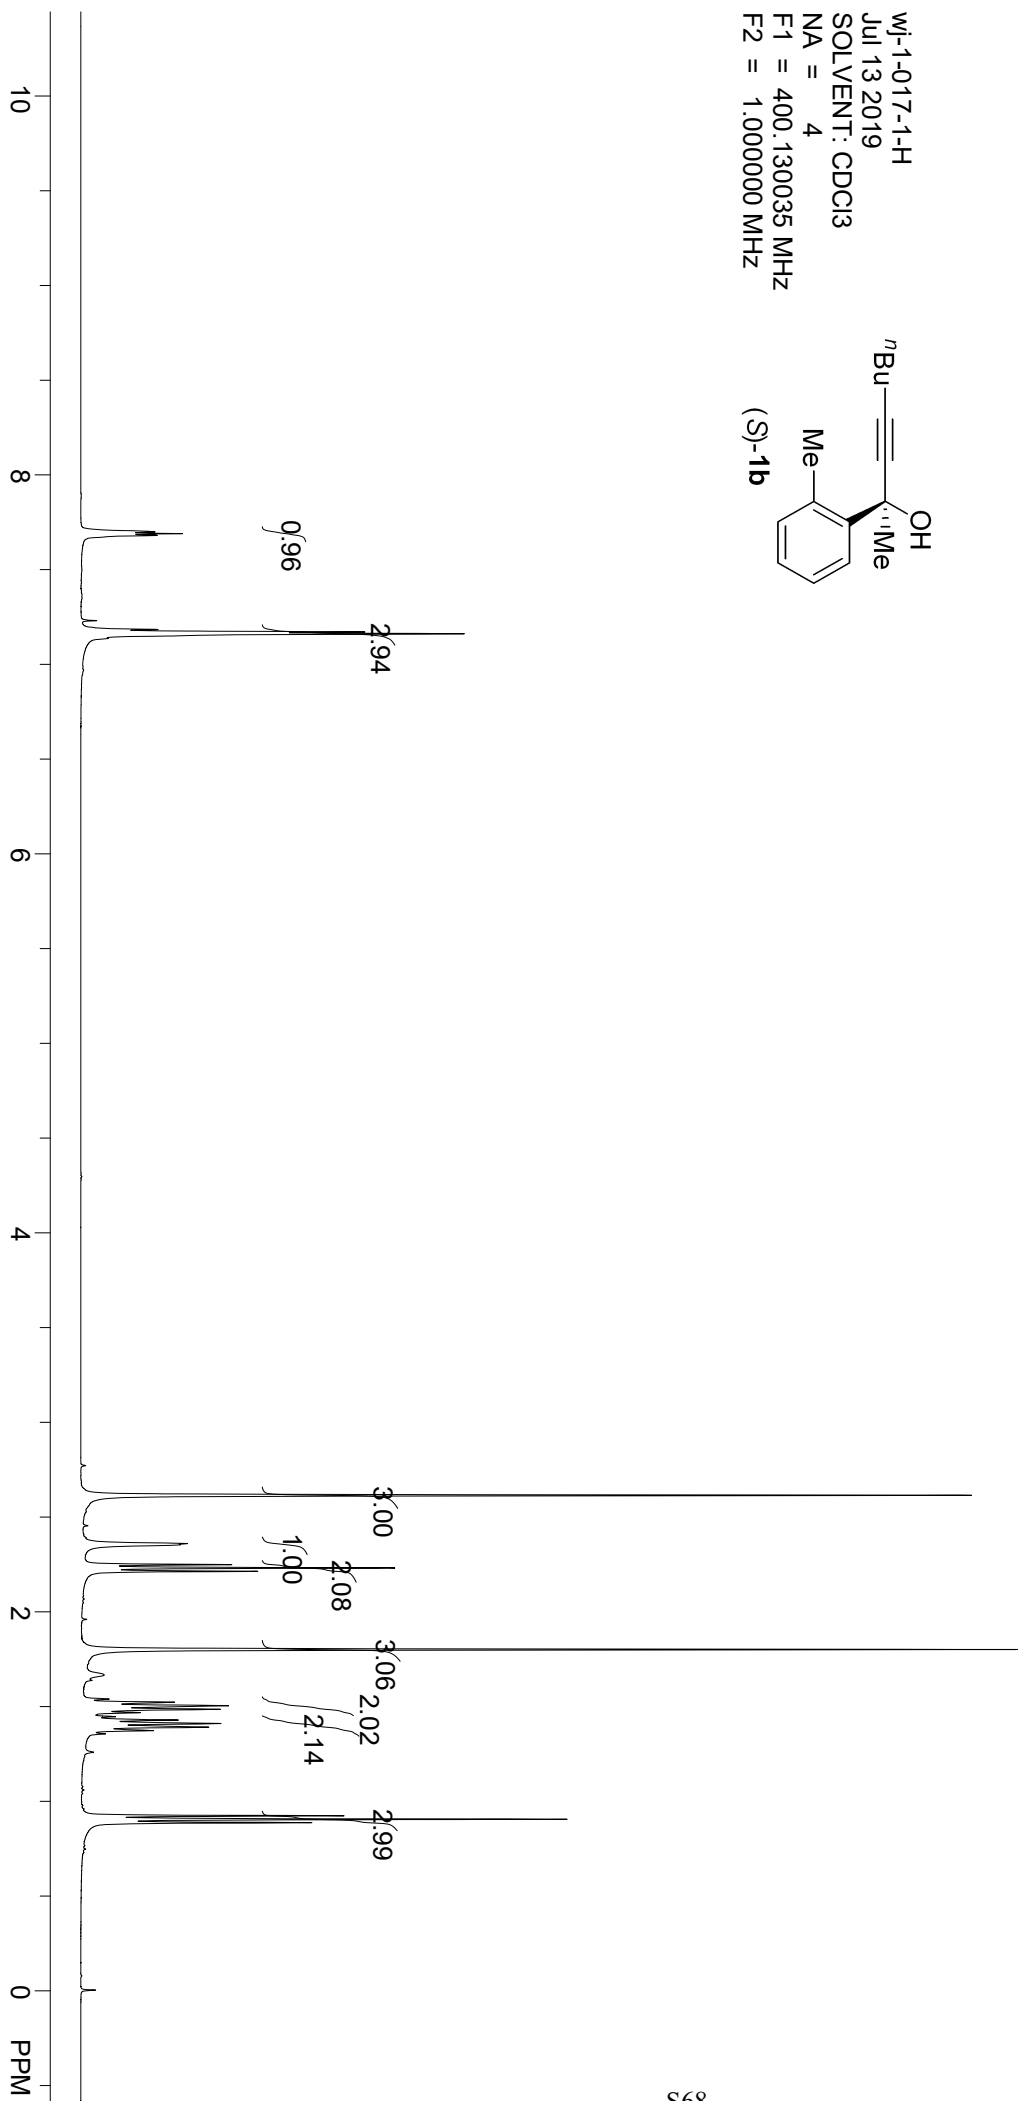

wf-1-017-1-C  
Jul 13 2019  
SOLVENT: CDCl3  
NA = 150  
F1 = 100.612770 MHz  
F2 = 1.000000 MHz

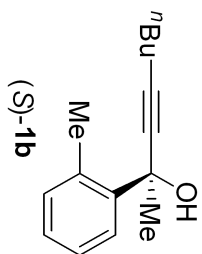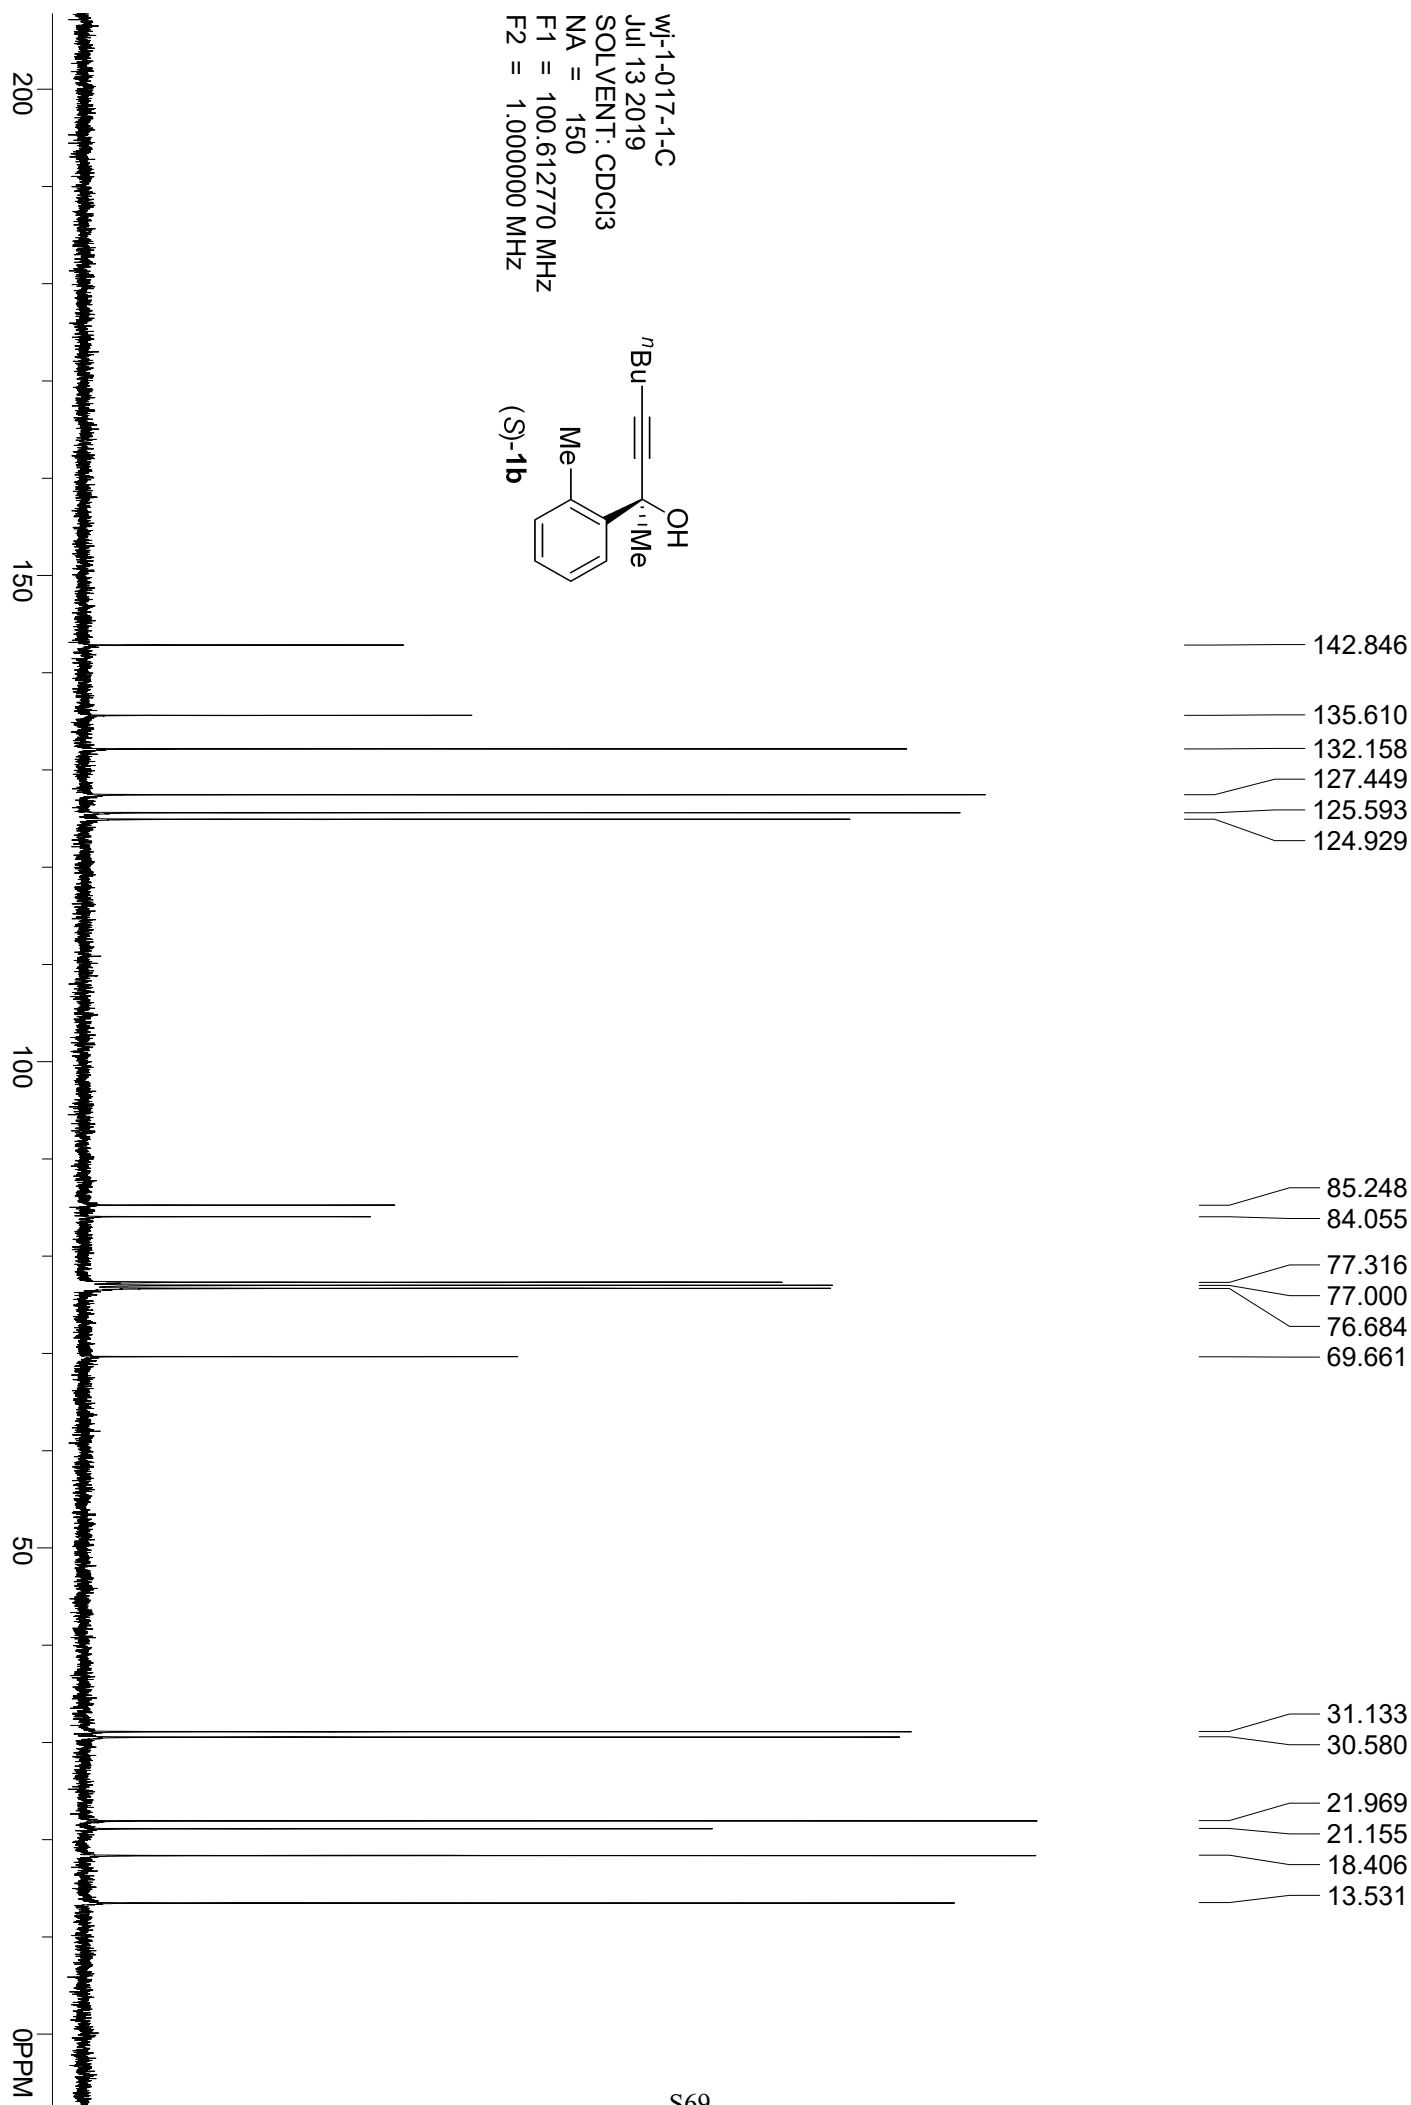

# Area Percent Report

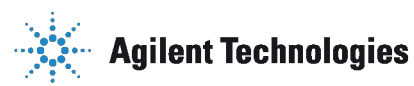

sample wj-1-017-1-AS-H-98-2-1.0-214

Data file: C:\Users\Public\Documents\ChemStation\1\Data\WJ\_LC 2019-07-13 22-07-09\003-P2-C1-wj-1-017-1.D

## Acquisition Data:

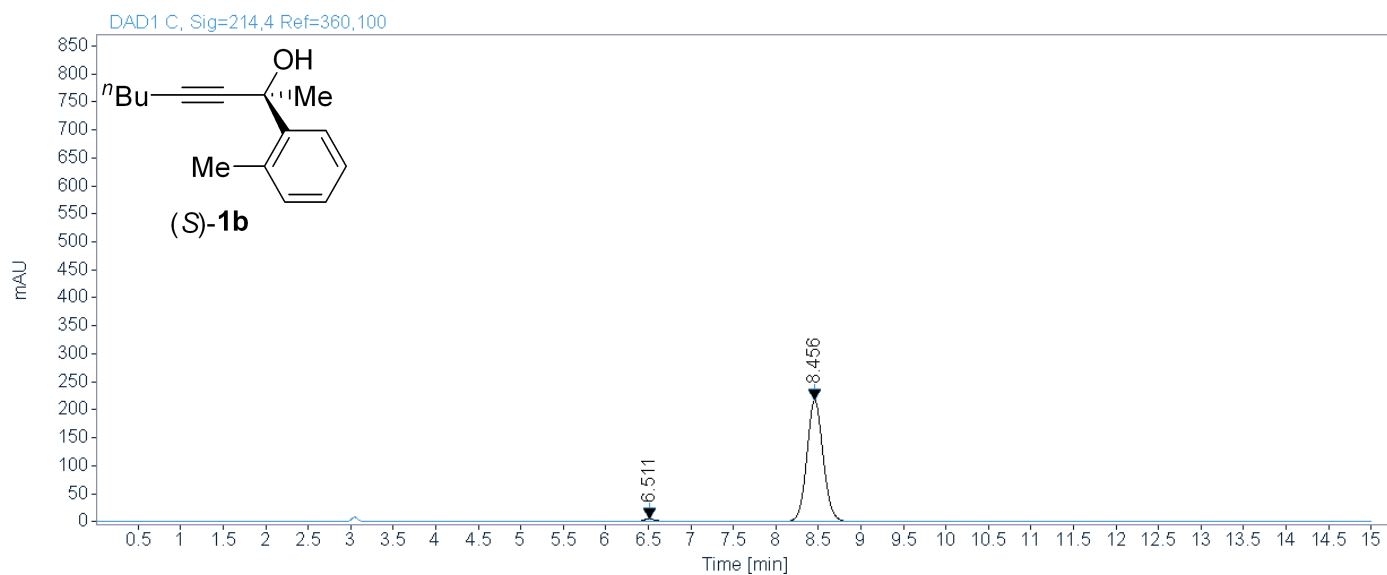

Signal: DAD1 C, Sig=214,4 Ref=360,100

| RT [min] | Width [min] | Height   | Area      | Area%    |
|----------|-------------|----------|-----------|----------|
| 6.511    | 0.1597      | 4.5076   | 47.0272   | 1.5953   |
| 8.456    | 0.2057      | 217.3427 | 2900.7468 | 98.4047  |
| Sum      |             |          | 2947.7741 | 100.0000 |

# Area Percent Report

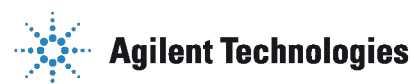

sample wj-1-017-1--rac-AS-H-98-2-1.0-214

Data file: C:\Users\Public\Documents\ChemStation\1\Data\WJ\_LC 2019-07-13 22-07-09\004-P2-C2-wj-1-017-1-rac.D

## Acquisition Data:

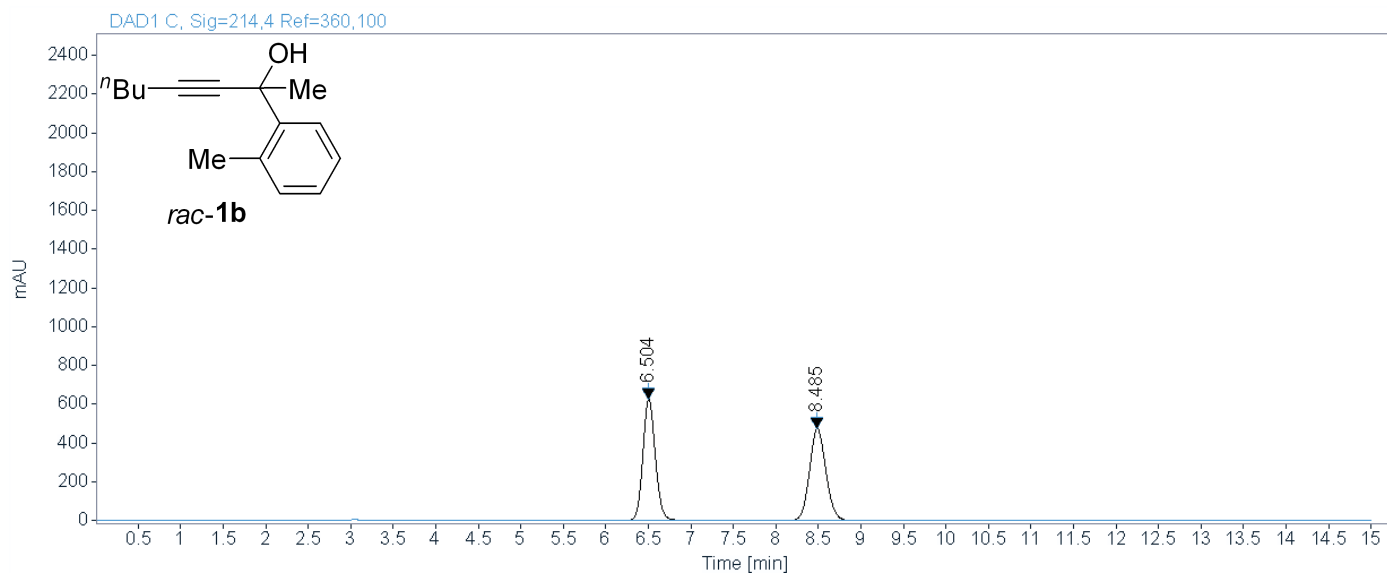

Signal: DAD1 C, Sig=214,4 Ref=360,100

| RT [min] | Width [min] | Height   | Area       | Area%    |
|----------|-------------|----------|------------|----------|
| 6.504    | 0.1573      | 628.7550 | 6430.8804  | 50.0834  |
| 8.485    | 0.2092      | 475.5550 | 6409.4746  | 49.9166  |
| Sum      |             |          | 12840.3550 | 100.0000 |

7.467  
7.455  
7.434  
7.251  
7.232  
7.213  
7.093  
7.074

2.365  
2.290  
2.273  
2.255  
1.728  
1.571  
1.554  
1.535  
1.517  
1.500  
1.484  
1.466  
1.447  
1.429  
1.411  
1.393  
0.944  
0.926  
0.908  
-0.000

wj-1-020-1-H  
Jul 16 2019  
SOLVENT: CDCl3  
NA = 4  
F1 = 400.130005 MHz  
F2 = 1.000000 MHz

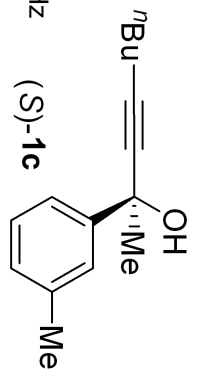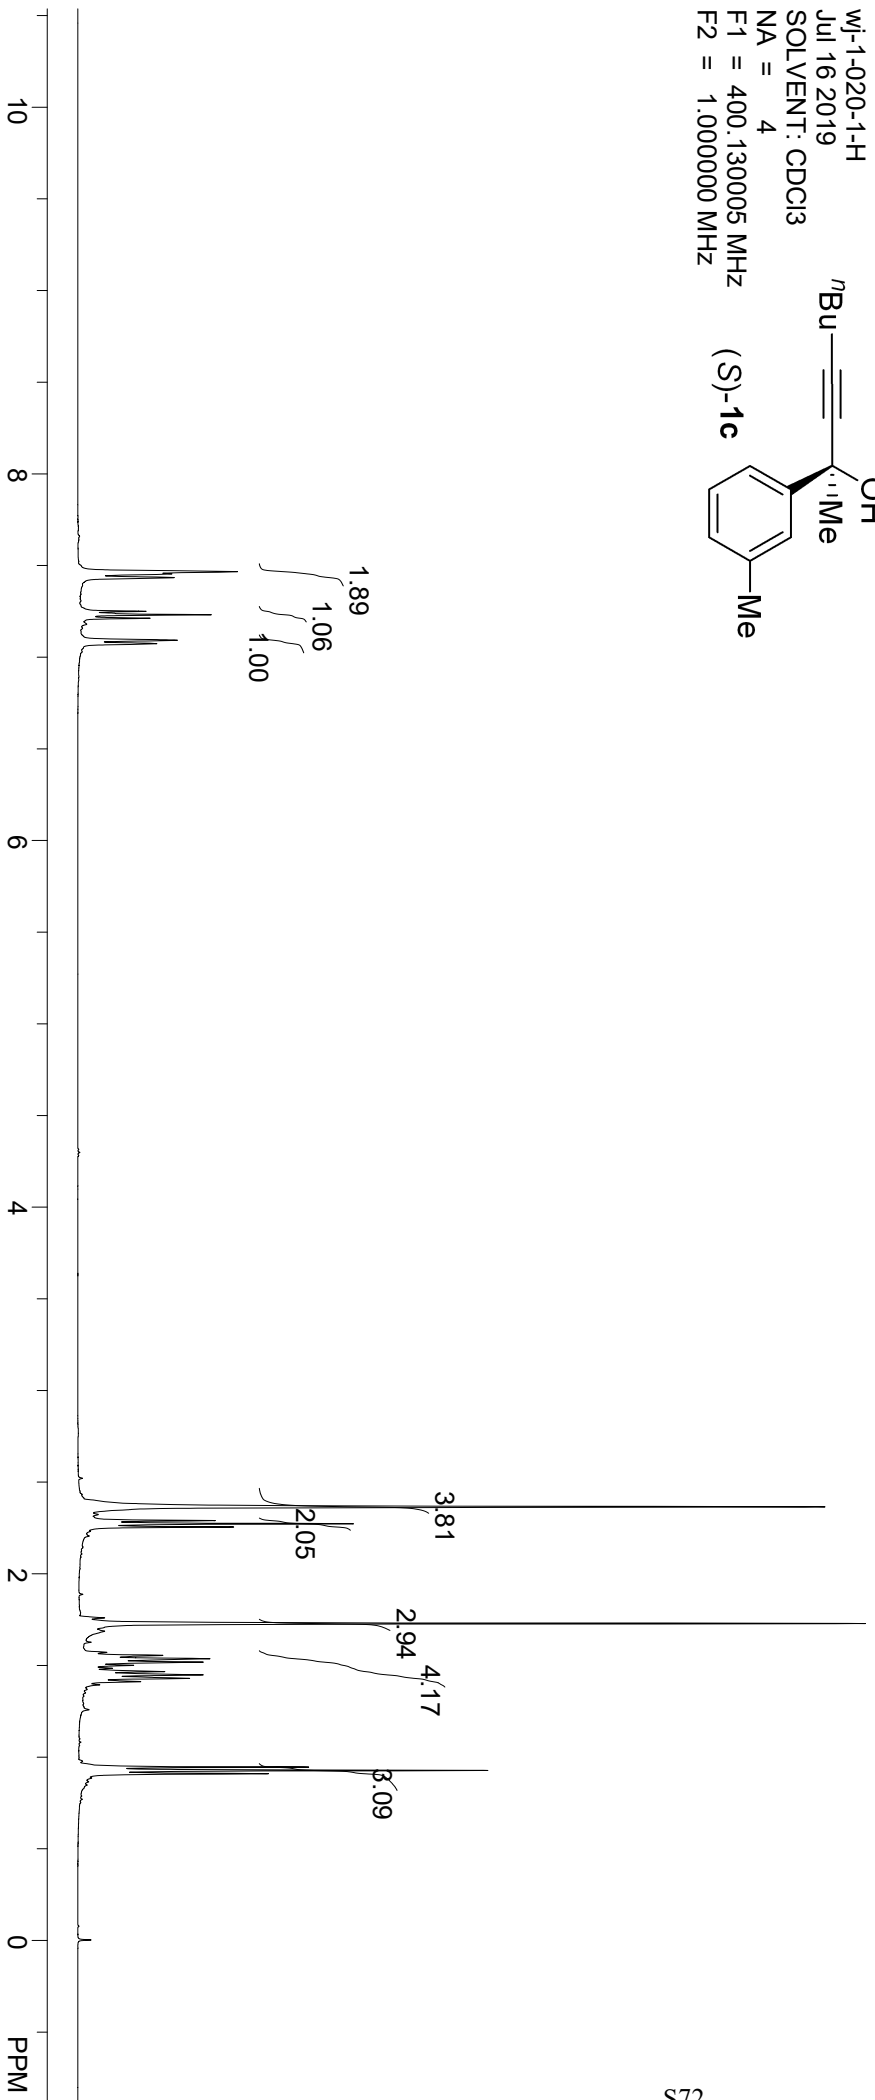



wj-1-020-1-C  
Jul 16 2019  
SOLVENT: CDCl3  
NA = 128  
F1 = 100.612770 MHz  
F2 = 1.000000 MHz

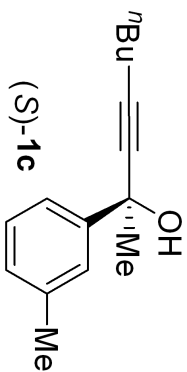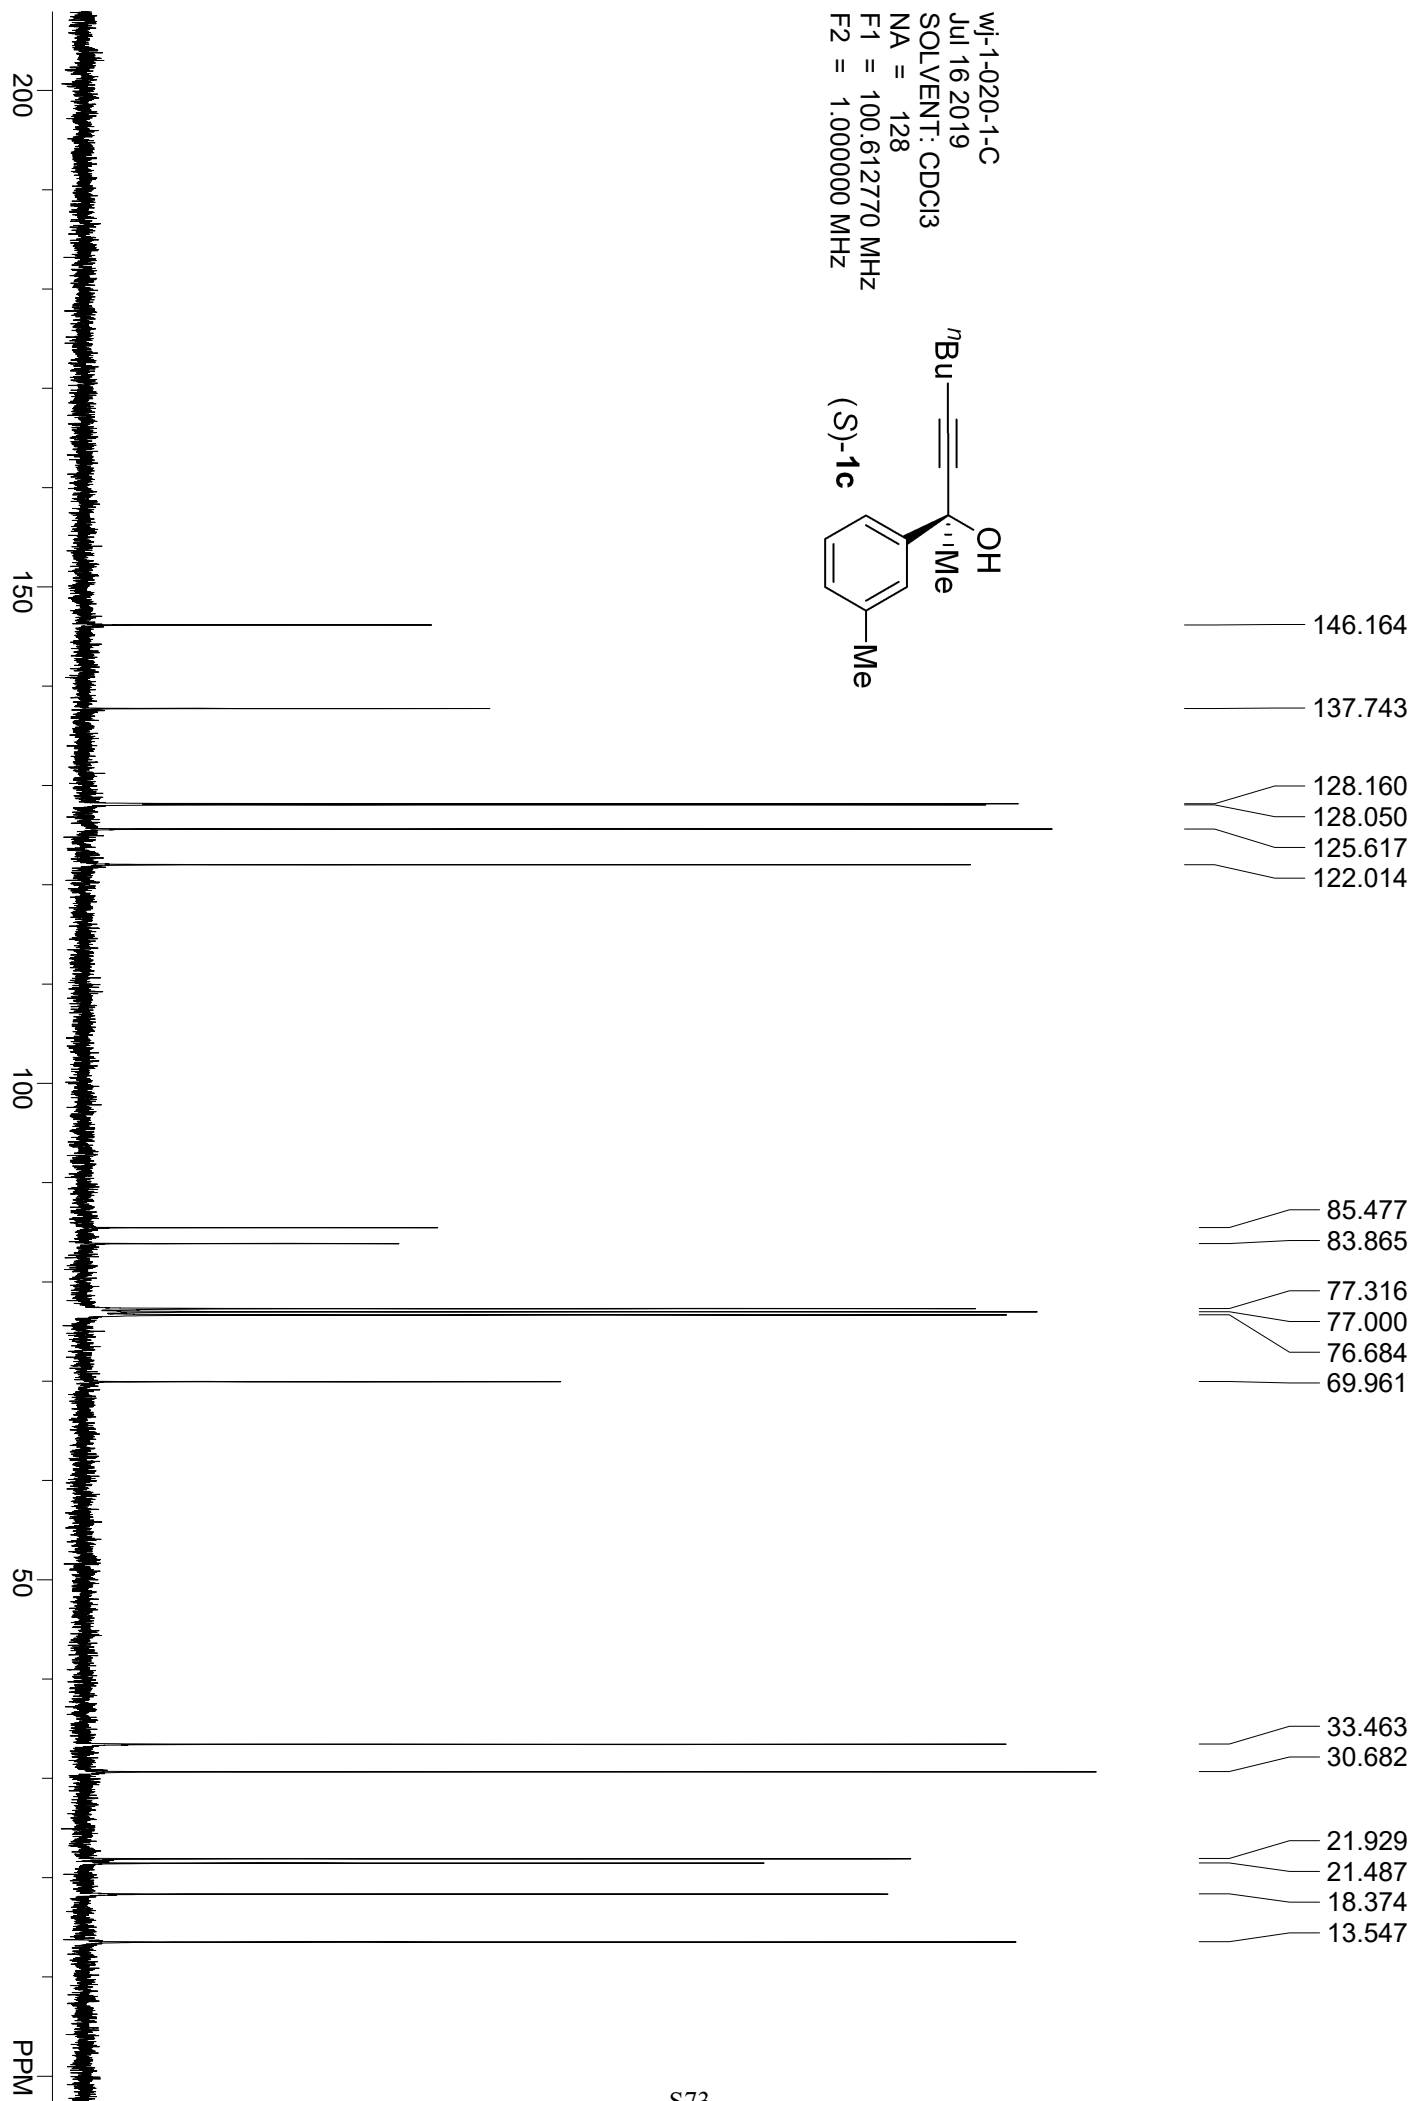

# Area Percent Report

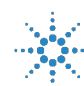

Agilent Technologies

sample wj-1-020-1-AS-H-98-2-1.0-214

Data file: C:\Users\Public\Documents\ChemStation\1\Data\zwf-allenioc acid\_LC 2019-07-17 08-33-24\018-P2-C1-wj-1-020-1.D

## Acquisition Data:

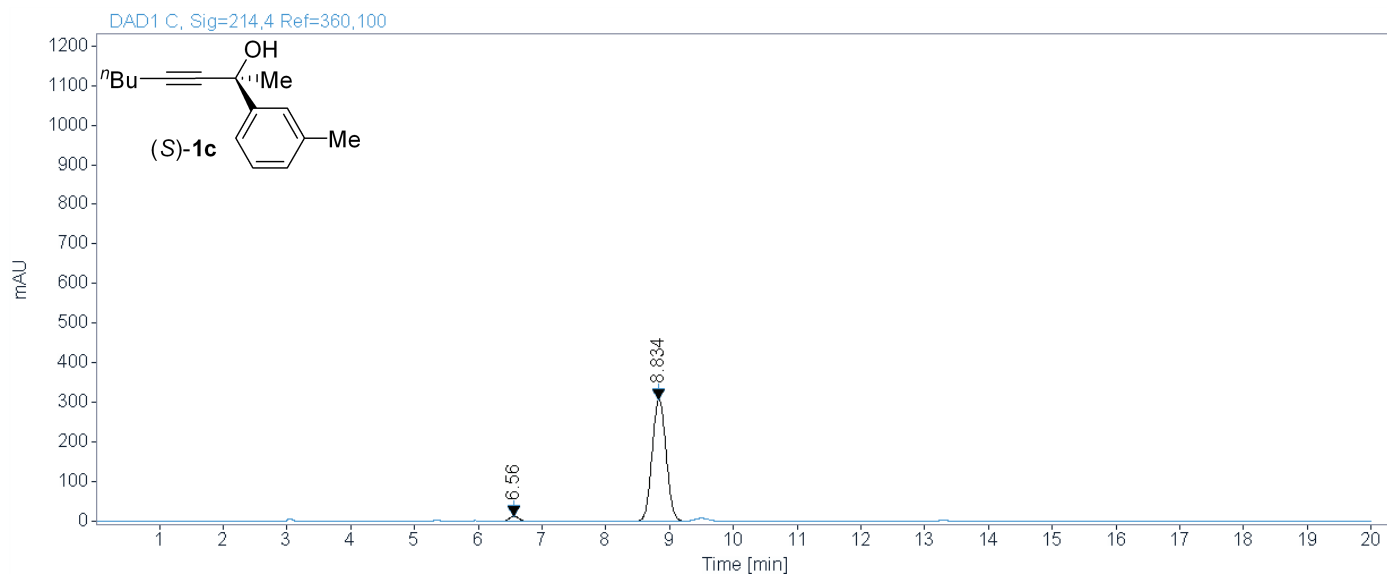

Signal: DAD1 C, Sig=214,4 Ref=360,100

| RT [min] | Width [min] | Height   | Area      | Area%    |
|----------|-------------|----------|-----------|----------|
| 6.560    | 0.1728      | 13.1455  | 145.0943  | 2.9778   |
| 8.834    | 0.2559      | 307.9590 | 4727.5161 | 97.0222  |
|          |             | Sum      | 4872.6104 | 100.0000 |

# Area Percent Report



sample wj-1-020-1-rac-AS-H-98-2-1.0-214

Data file: C:\Users\Public\Documents\ChemStation\1\Data\zwf-allenioc acid\_LC 2019-07-17 08-33-24\019-P2-C2-wj-1-020-1-rac.D

## Acquisition Data:

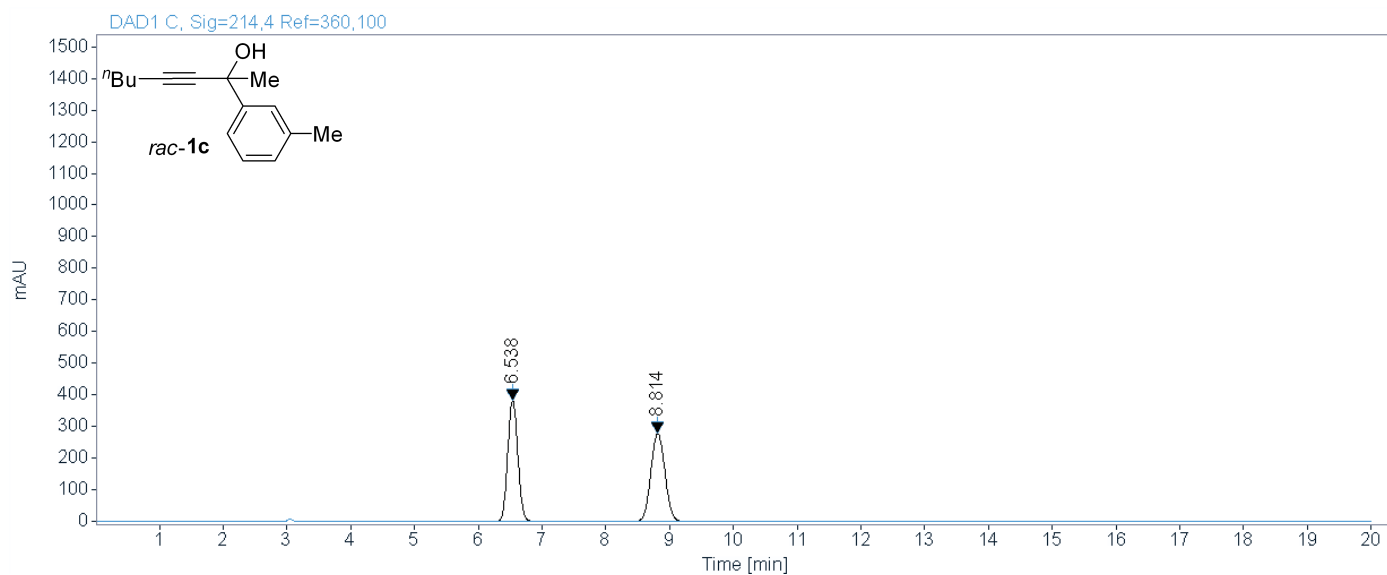

Signal: DAD1 C, Sig=214,4 Ref=360,100

| RT [min] | Width [min] | Height   | Area      | Area%    |
|----------|-------------|----------|-----------|----------|
| 6.538    | 0.1757      | 384.6389 | 4292.6299 | 50.0367  |
| 8.814    | 0.2435      | 278.5787 | 4286.3359 | 49.9633  |
| Sum      |             |          | 8578.9658 | 100.0000 |

WJ-1-024-1-H  
Jul 18 2019  
SOLVENT: CDCl3  
NA = 4  
F1 = 400.130005 MHz  
F2 = 1.000000 MHz

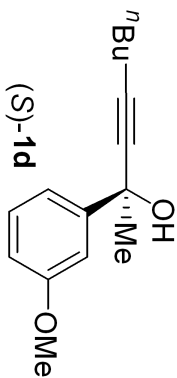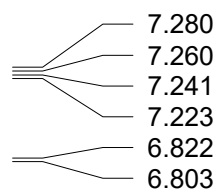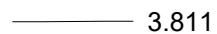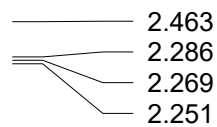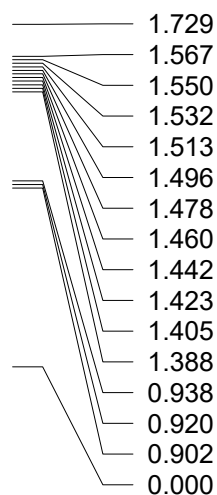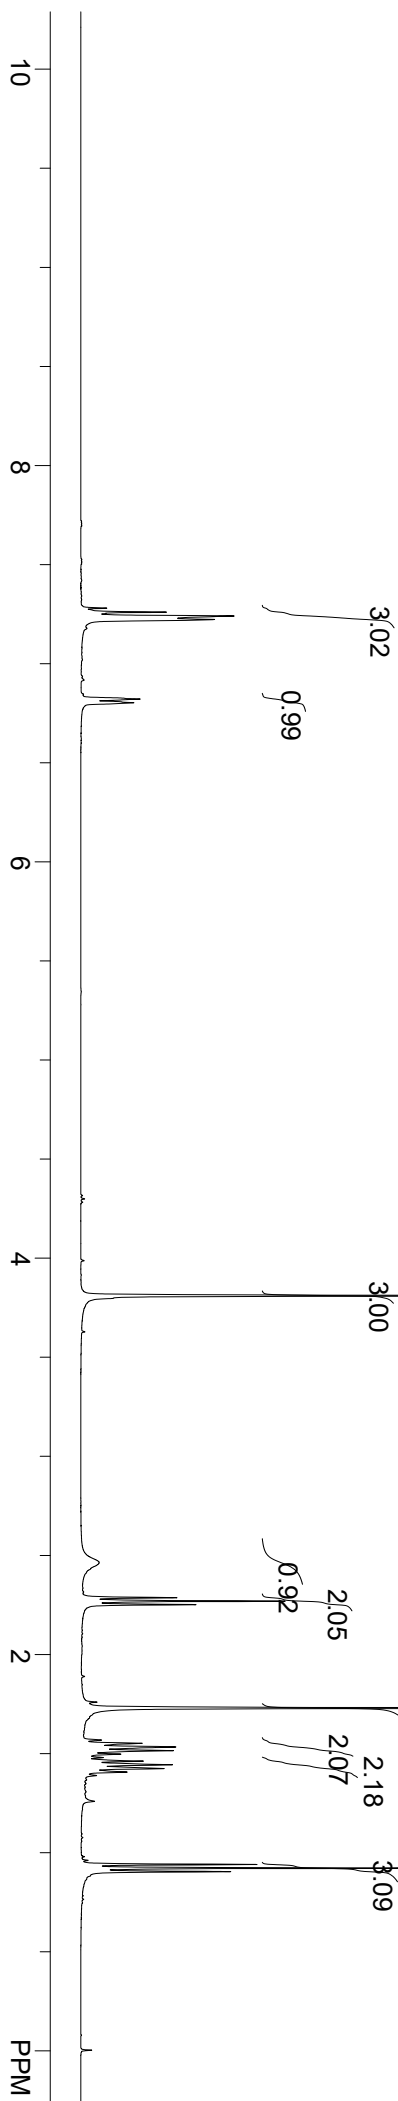

wj-1-024-1-C  
Jul 18 2019  
SOLVENT: CDCl3  
NA = 150  
F1 = 100.612770 MHz  
F2 = 1.000000 MHz

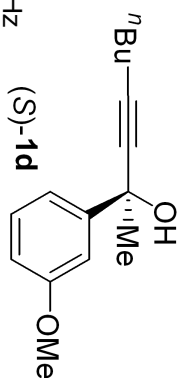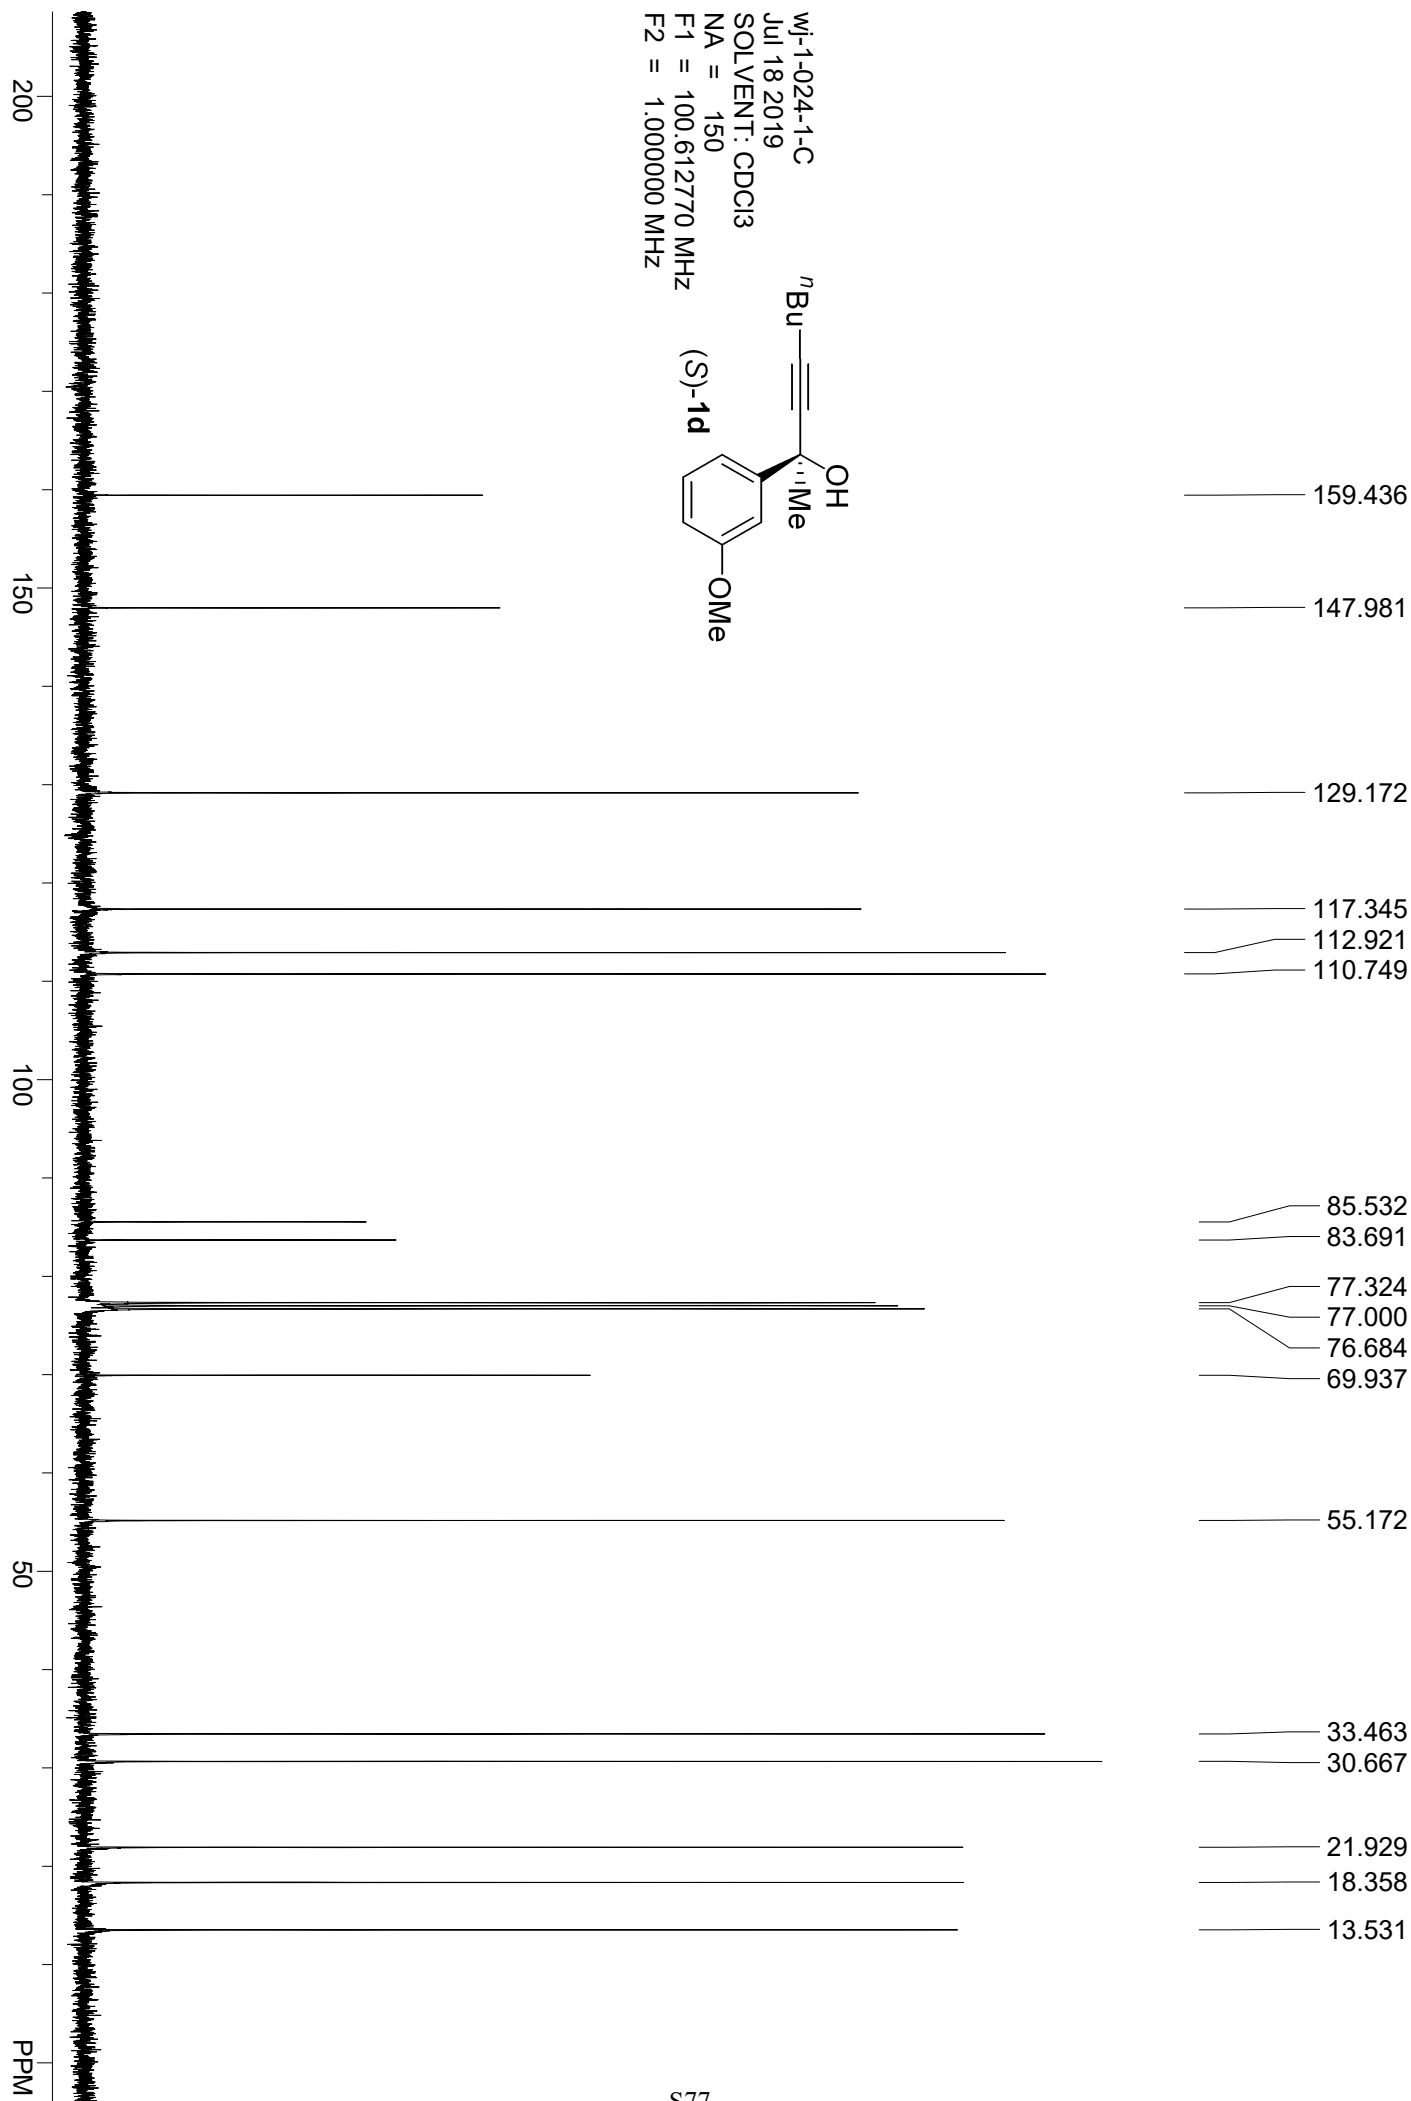

# Area Percent Report

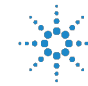

Agilent Technologies

sample wj-024-1-AS-H-98-2-1.0-214

Data file: C:\Users\Public\Documents\ChemStation\1\Data\WJ\_LC 2019-07-18 18-05-16\003-P2-C1-wj-1-024-1.D

## Acquisition Data:

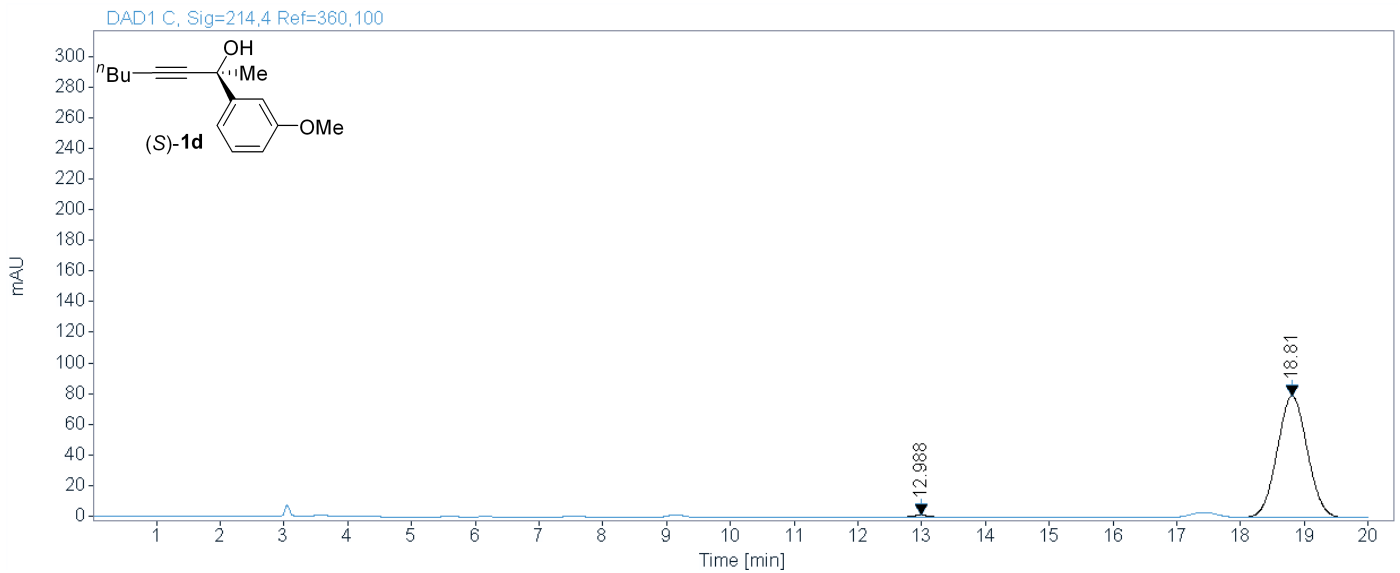

Signal: DAD1 C, Sig=214,4 Ref=360,100

| RT [min] | Width [min] | Height  | Area      | Area%    |
|----------|-------------|---------|-----------|----------|
| 12.988   | 0.3349      | 1.5093  | 33.2290   | 1.2575   |
| 18.810   | 0.5153      | 79.4234 | 2609.1577 | 98.7425  |
|          | Sum         |         | 2642.3867 | 100.0000 |

# Area Percent Report

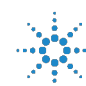

Agilent Technologies

sample wj-024-1-rac-AS-H-98-2-1.0-214

Data file: C:\Users\Public\Documents\ChemStation\1\Data\WJ\_LC 2019-07-18 18-05-16\004-P2-C2-wj-1-024-1-rac.D

## Acquisition Data:

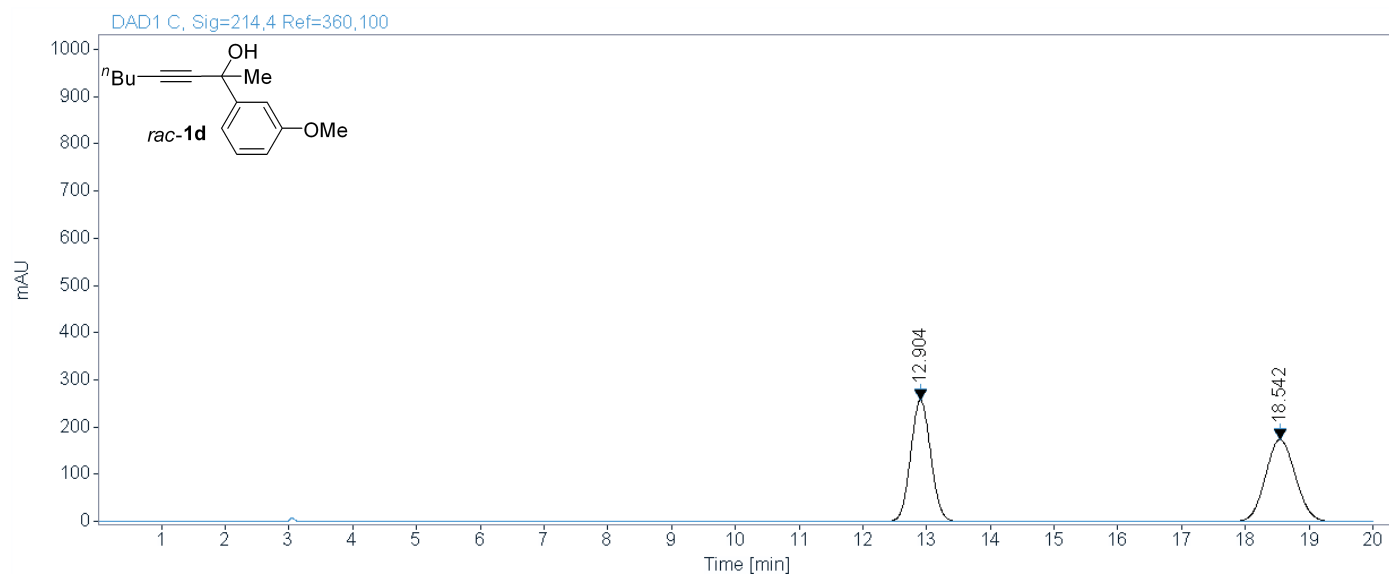

Signal: DAD1 C, Sig=214,4 Ref=360,100

| RT [min] | Width [min] | Height   | Area       | Area%    |
|----------|-------------|----------|------------|----------|
| 12.904   | 0.3434      | 257.7123 | 5642.5371  | 49.9467  |
| 18.542   | 0.5142      | 173.5065 | 5654.5762  | 50.0533  |
| Sum      |             |          | 11297.1133 | 100.0000 |

7.582  
7.560  
7.310  
7.289

2.445  
2.429  
2.279  
2.262  
2.244  
1.705  
1.561  
1.544  
1.526  
1.507  
1.489  
1.466  
1.448  
1.430  
1.411  
1.393  
1.376  
0.939  
0.921  
0.903  
-0.000

wj-1-027-1-H  
Jul 20 2019  
SOLVENT: CDCl3  
NA = 4  
F1 = 400.130005 MHz  
F2 = 1.000000 MHz

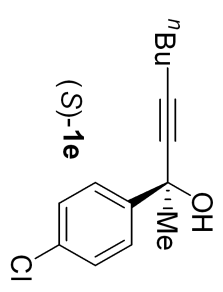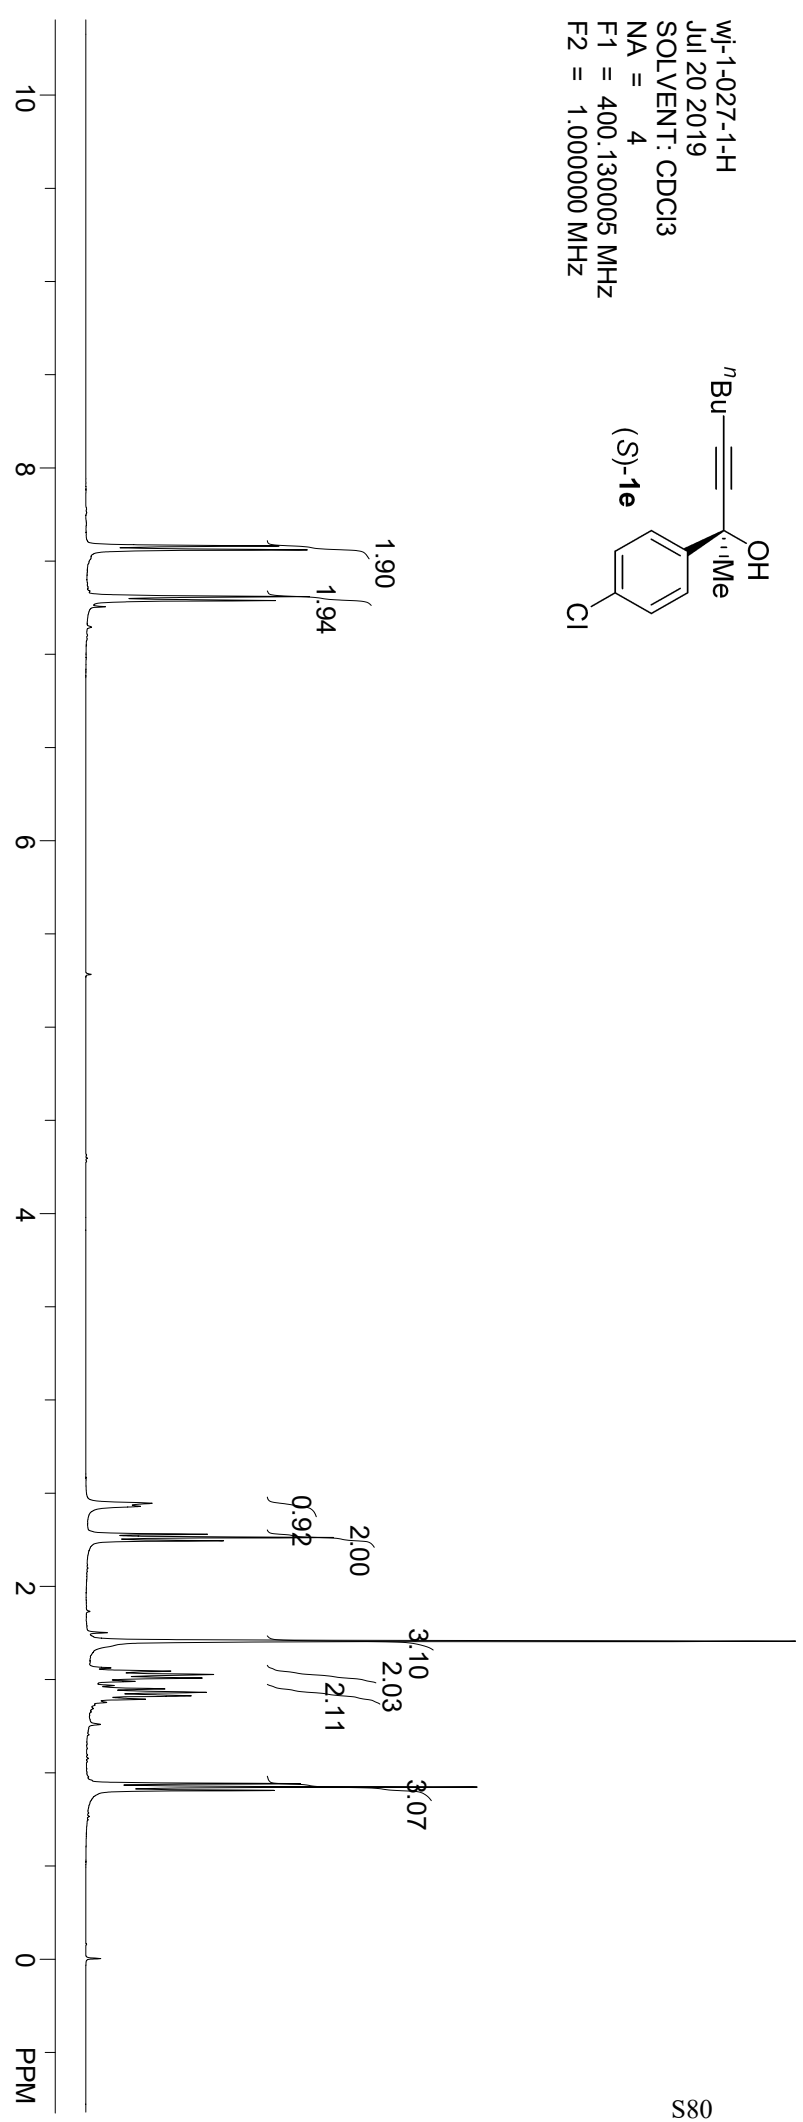



wj-1-027-1-C  
Juli 20 2019  
SOLVENT: CDCl3  
NA = 150  
F1 = 100.612770 MHz  
F2 = 1.000000 MHz

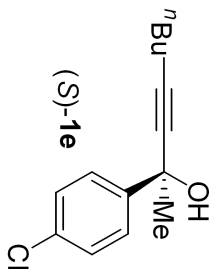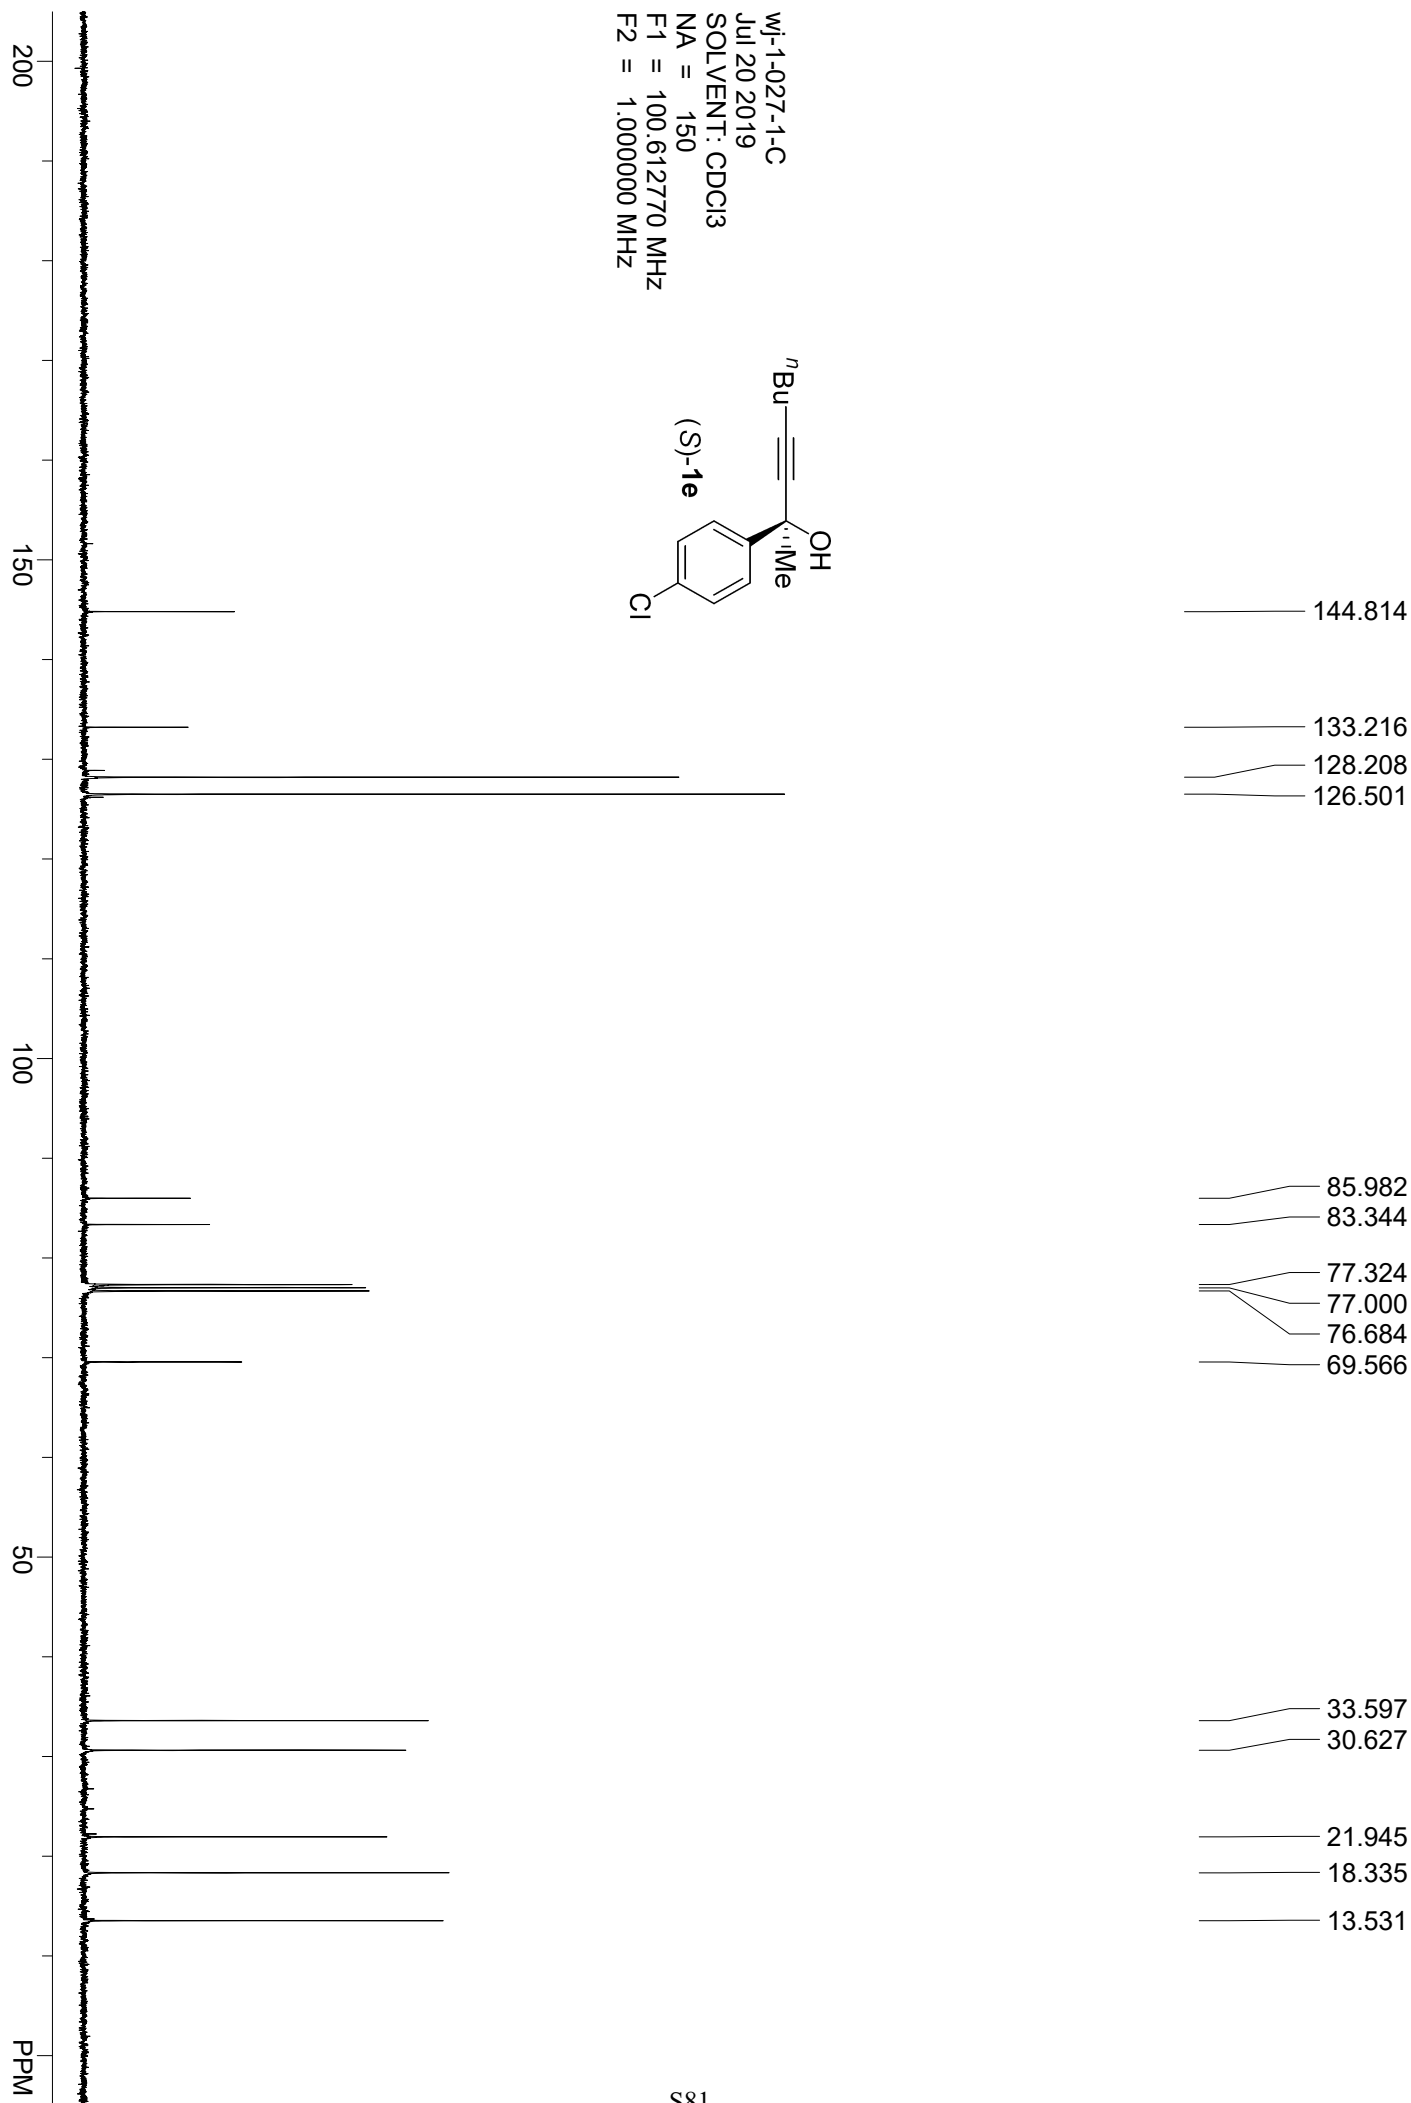

# Area Percent Report



sample wj-1-027-1-AS-H-98-2-1.0-214

Data file: C:\Users\Public\Documents\ChemStation\1\Data\WJ\_LC 2019-07-20 15-28-57\003-P2-C1-wj-1-027-1.D

## Acquisition Data:

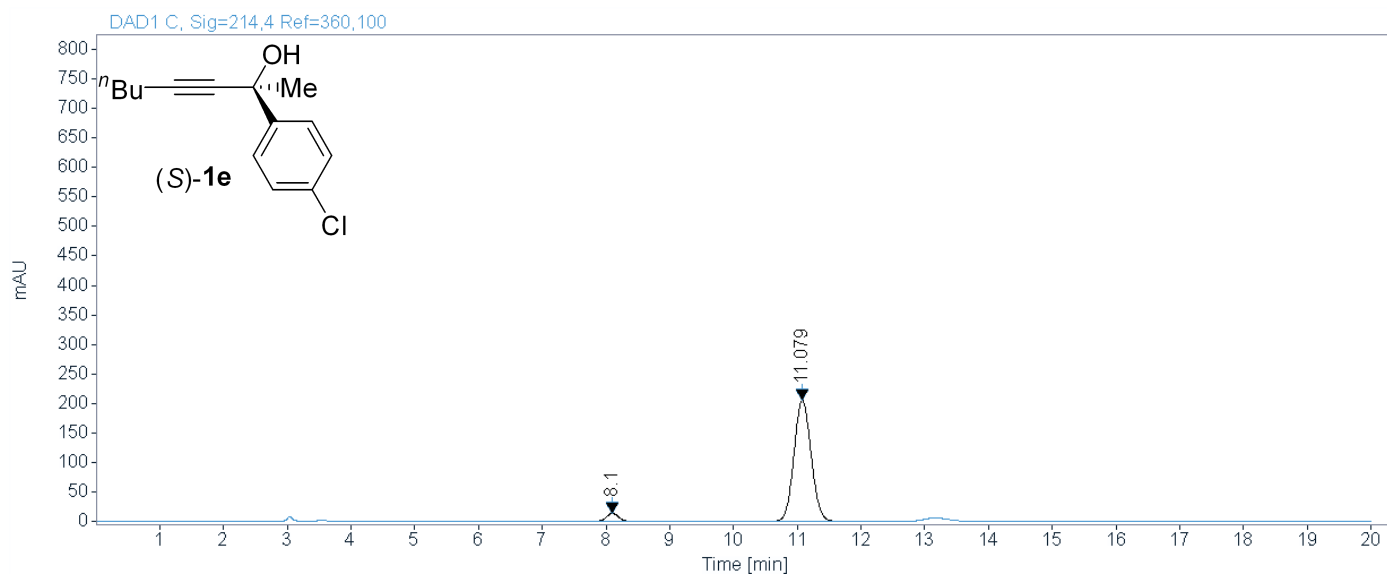

Signal: DAD1 C, Sig=214,4 Ref=360,100

| RT [min] | Width [min] | Height   | Area      | Area%    |
|----------|-------------|----------|-----------|----------|
| 8.100    | 0.2085      | 13.5342  | 181.5527  | 4.4689   |
| 11.079   | 0.2951      | 206.6439 | 3881.0625 | 95.5311  |
| Sum      |             |          | 4062.6152 | 100.0000 |

# Area Percent Report



Agilent Technologies

sample wj-1-027-1-rac-AS-H-98-2-1.0-214

Data file: C:\Users\Public\Documents\ChemStation\1\Data\WJ\_LC 2019-07-20 15-28-57\004-P2-C2-wj-1-027-1-rac.D

## Acquisition Data:

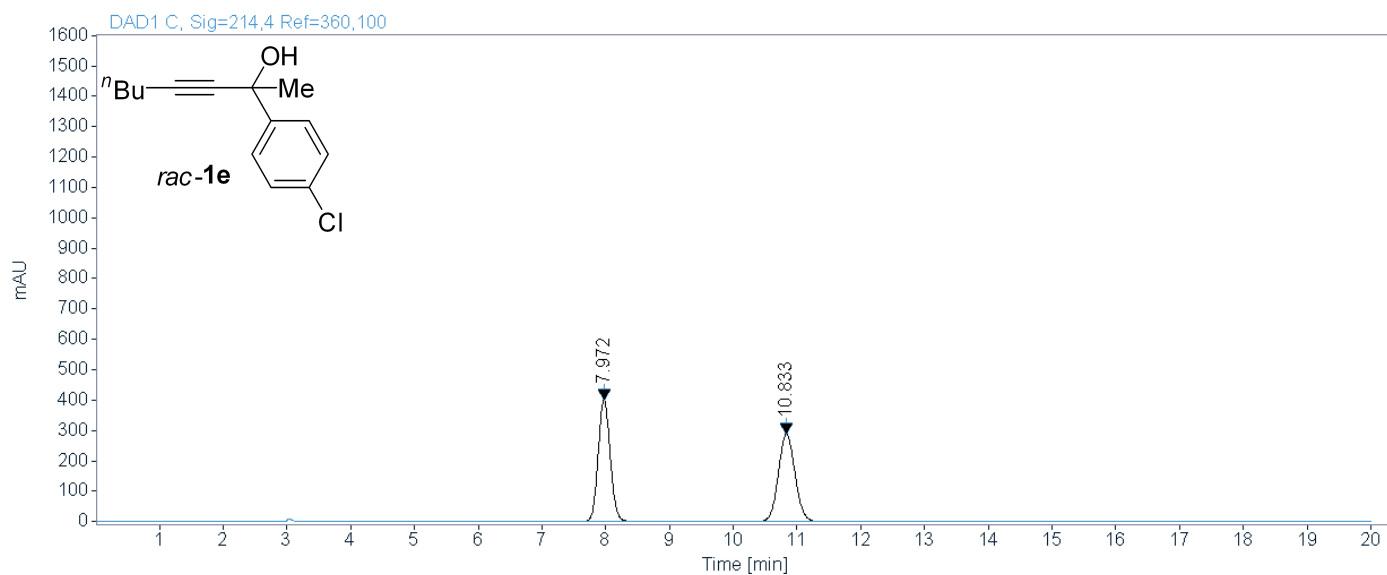

Signal: DAD1 C, Sig=214,4 Ref=360,100

| RT [min] | Width [min] | Height   | Area       | Area%    |
|----------|-------------|----------|------------|----------|
| 7.972    | 0.2023      | 400.7166 | 5230.1724  | 49.9318  |
| 10.833   | 0.2865      | 287.8897 | 5244.4502  | 50.0682  |
| Sum      |             |          | 10474.6226 | 100.0000 |

wj-1-028-1-H  
Jul 20 2019  
SOLVENT: CDCl3  
NA = 4  
F1 = 400.130005 MHz  
F2 = 1.000000 MHz

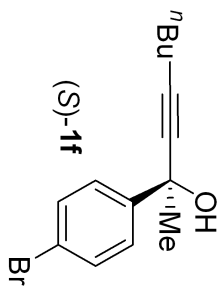

- 7.526
- 7.505
- 7.466
- 7.444
- 7.256

- 2.419
- 2.368
- 2.278
- 2.261
- 2.243
- 1.702
- 1.560
- 1.543
- 1.525
- 1.506
- 1.488
- 1.466
- 1.447
- 1.429
- 1.410
- 1.392
- 1.375
- 1.257
- 0.939
- 0.921
- 0.903
- 0.000

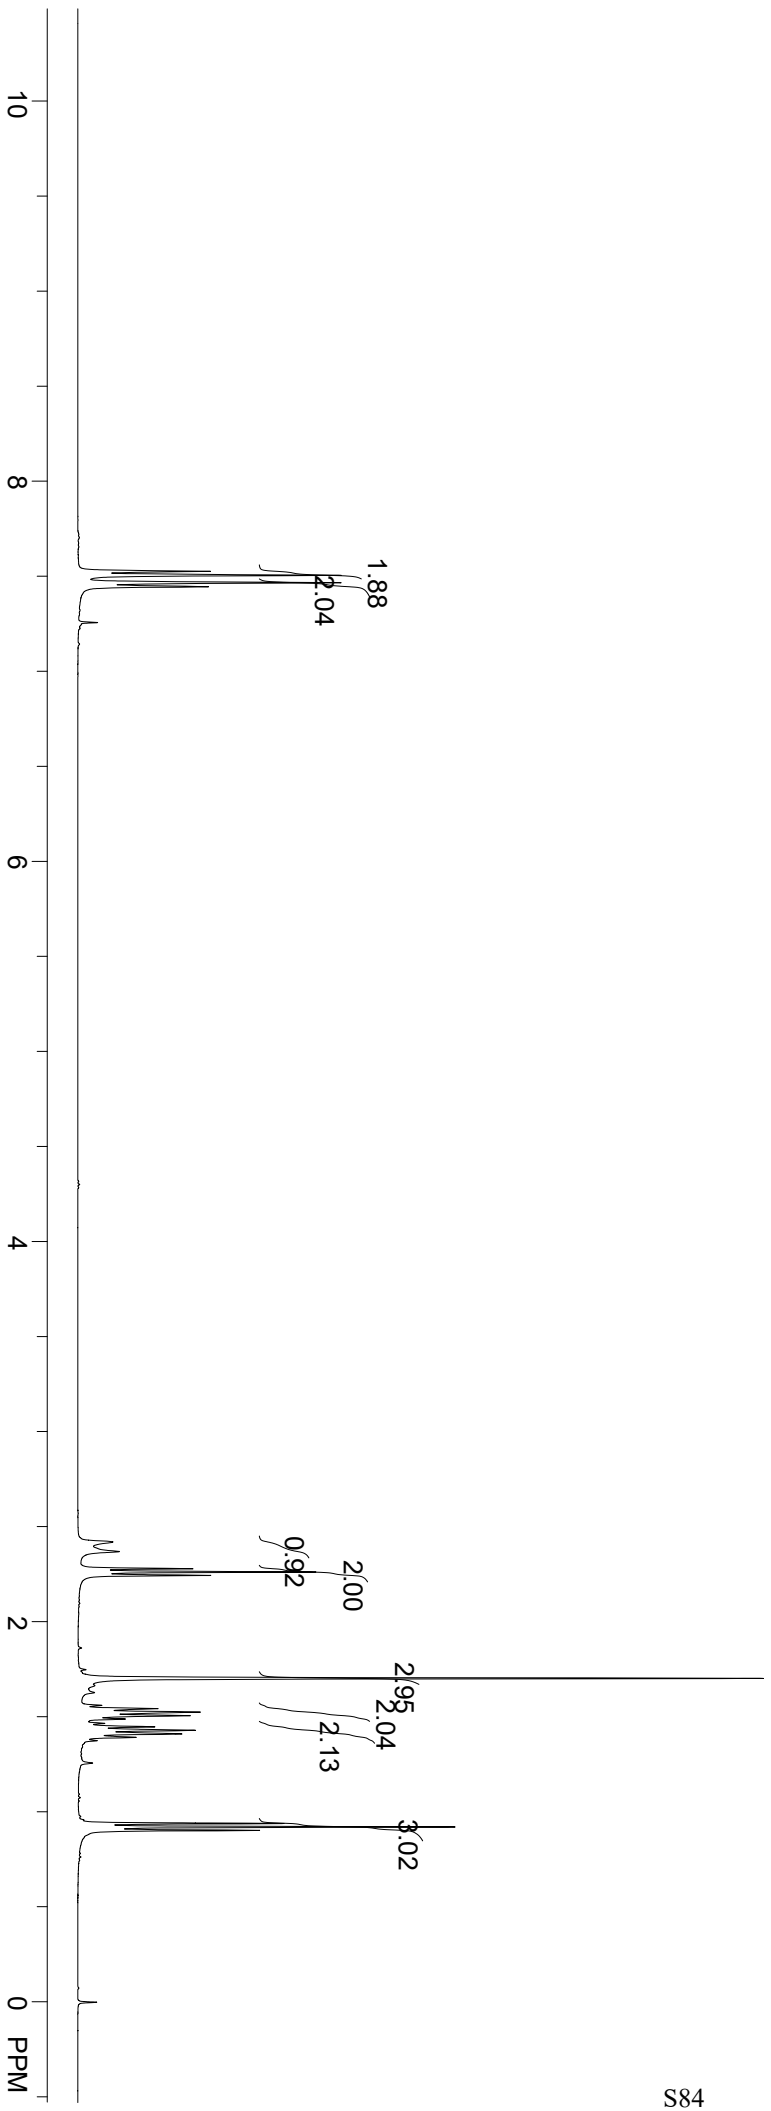

wj-1-028-1-C  
Jul 20 2019  
SOLVENT: CDCl3  
NA = 150  
F1 = 100.612770 MHz  
F2 = 1.000000 MHz

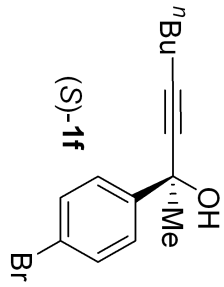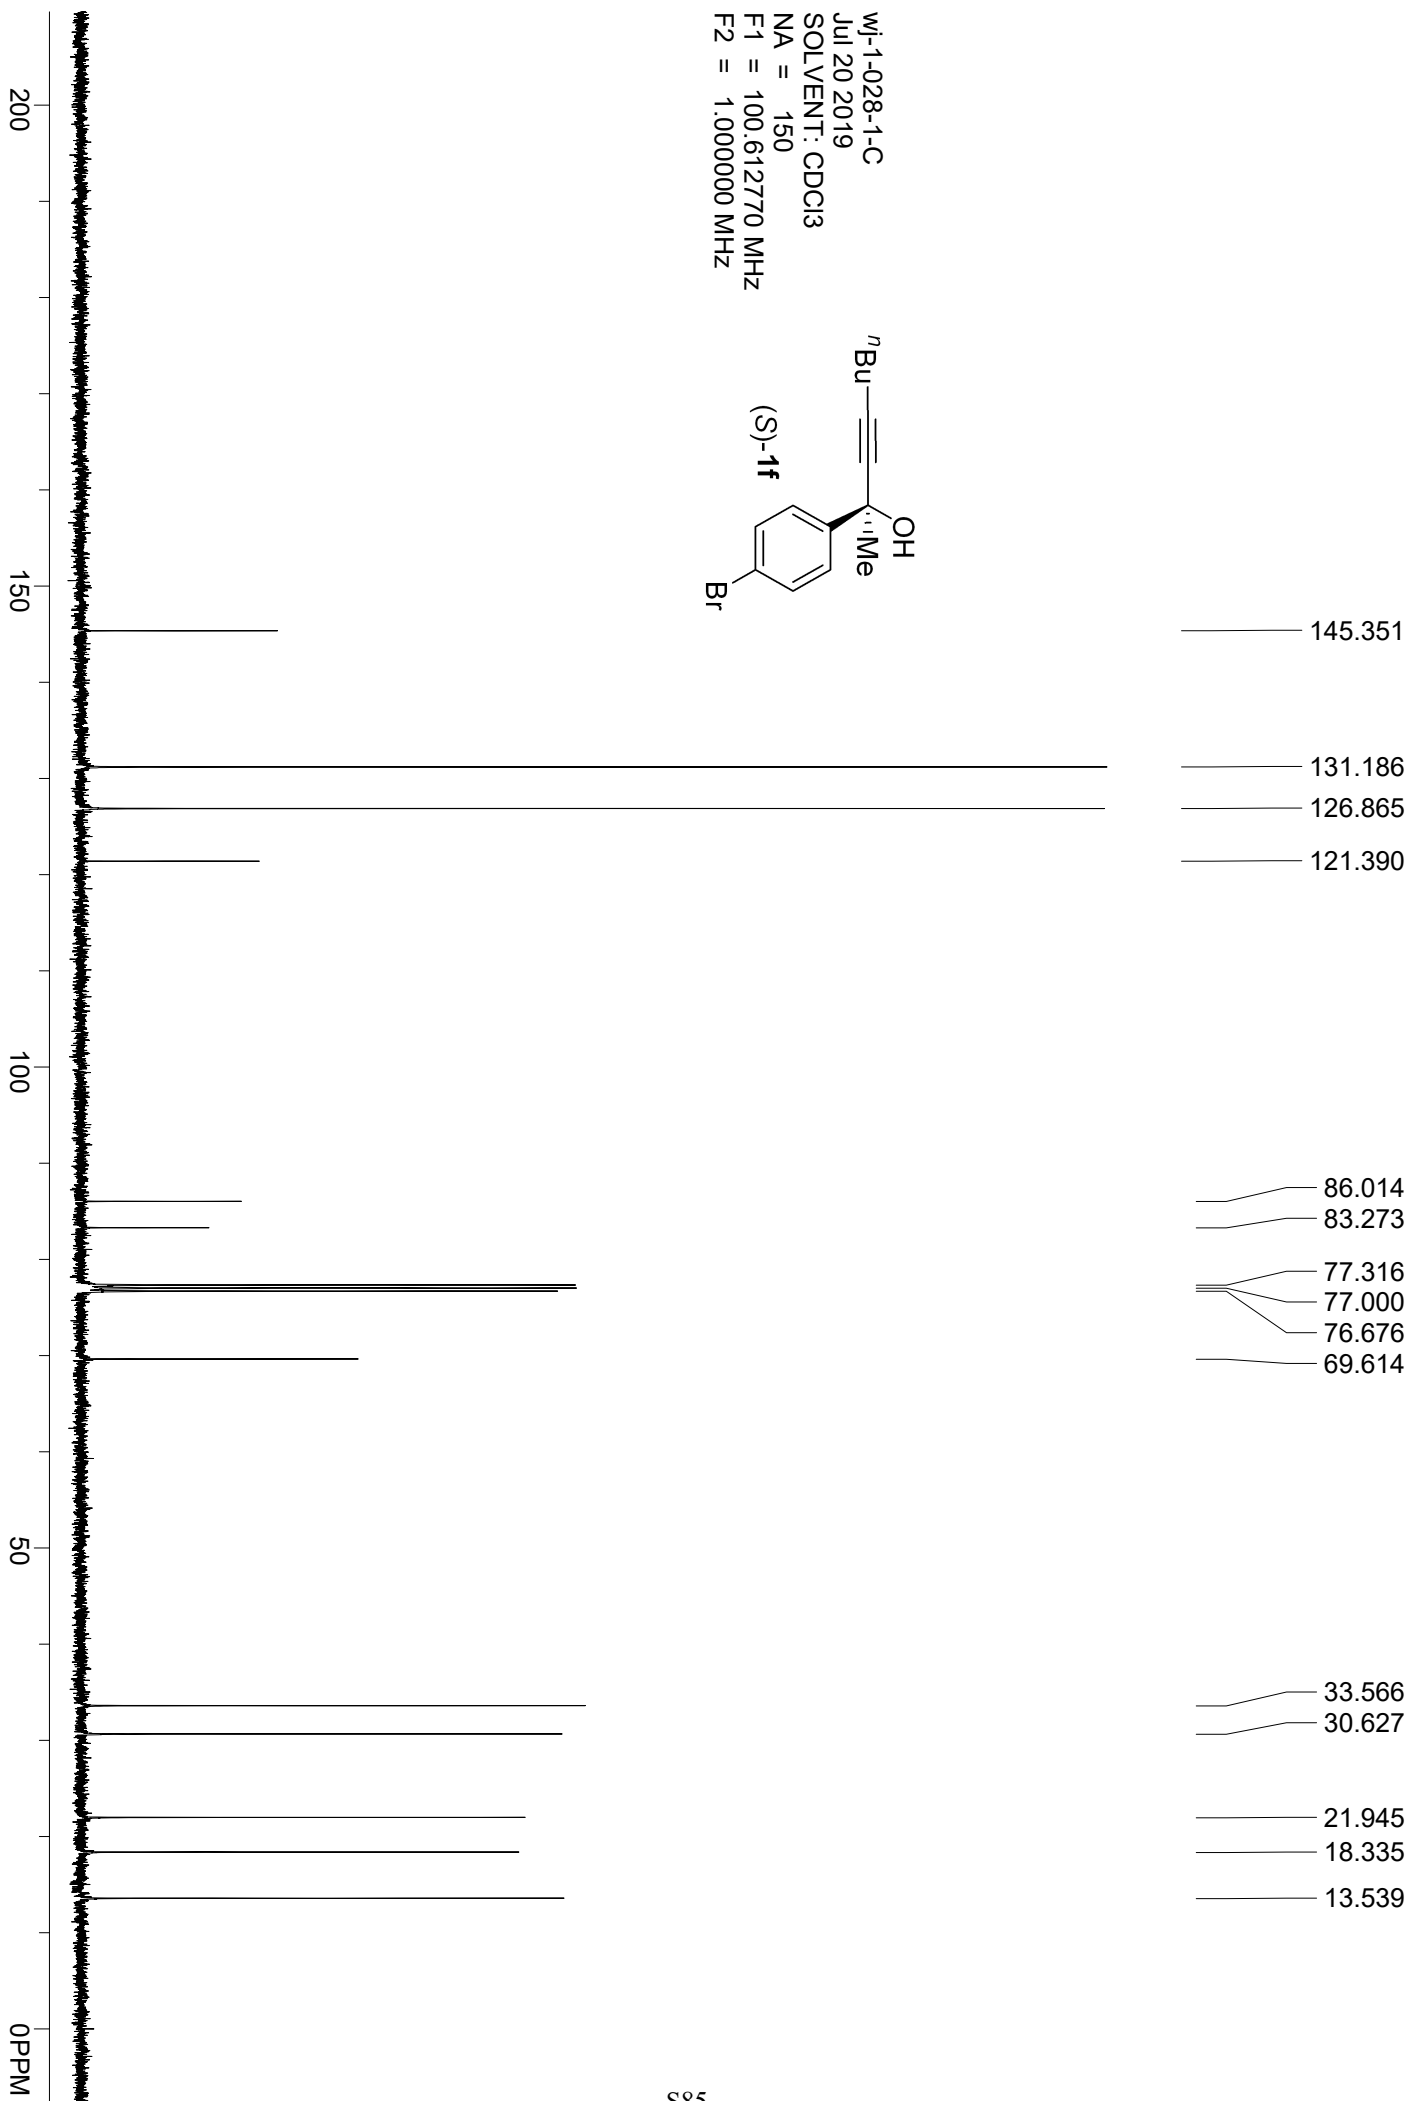

# Area Percent Report



Agilent Technologies

sample wj-1-028-1-AS-H-98-2-1.0-214

Data file: C:\Users\Public\Documents\ChemStation\1\Data\WJ\_LC 2019-07-20 19-12-56\022-P2-C1-wj-1-028-1.D

## Acquisition Data:

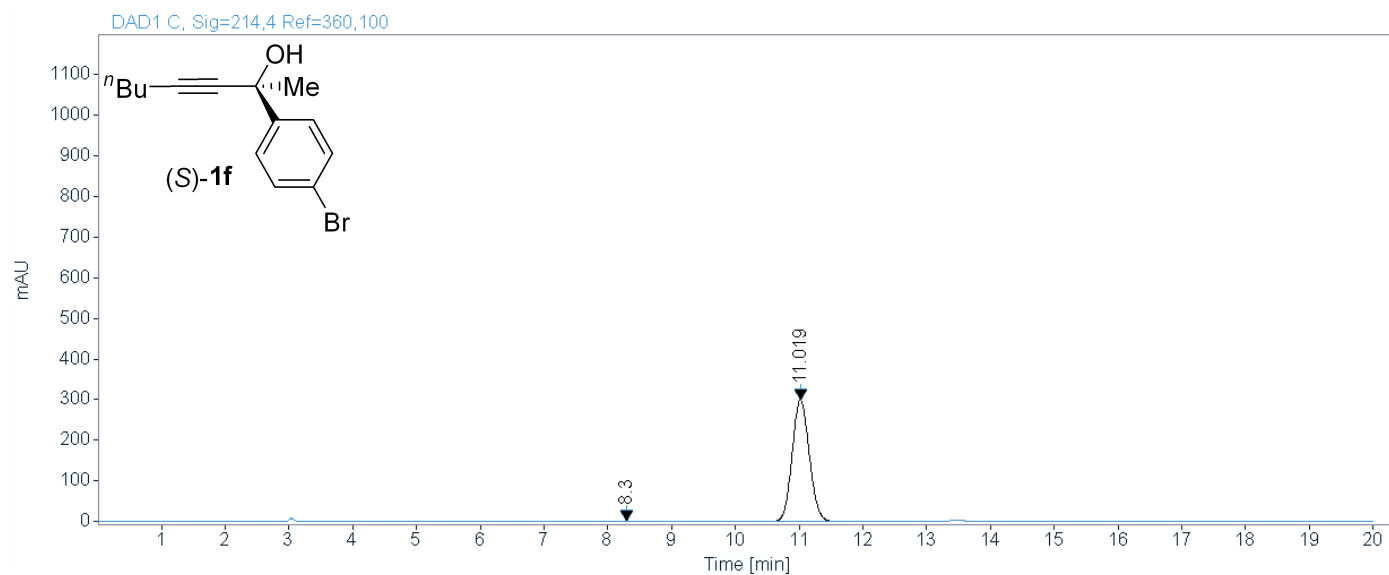

Signal: DAD1 C, Sig=214,4 Ref=360,100

| RT [min] | Width [min] | Height   | Area      | Area%    |
|----------|-------------|----------|-----------|----------|
| 8.300    | 0.2195      | 1.1975   | 16.9838   | 0.2998   |
| 11.019   | 0.2957      | 299.9573 | 5648.5952 | 99.7002  |
|          |             | Sum      | 5665.5790 | 100.0000 |

# Area Percent Report



Agilent Technologies

sample wj-1-028-1-rac-AS-H-98-2-1.0-214

Data file: C:\Users\Public\Documents\ChemStation\1\Data\WJ\_LC 2019-07-20 19-12-56\023-P2-C2-wj-1-028-1-rac.D

## Acquisition Data:

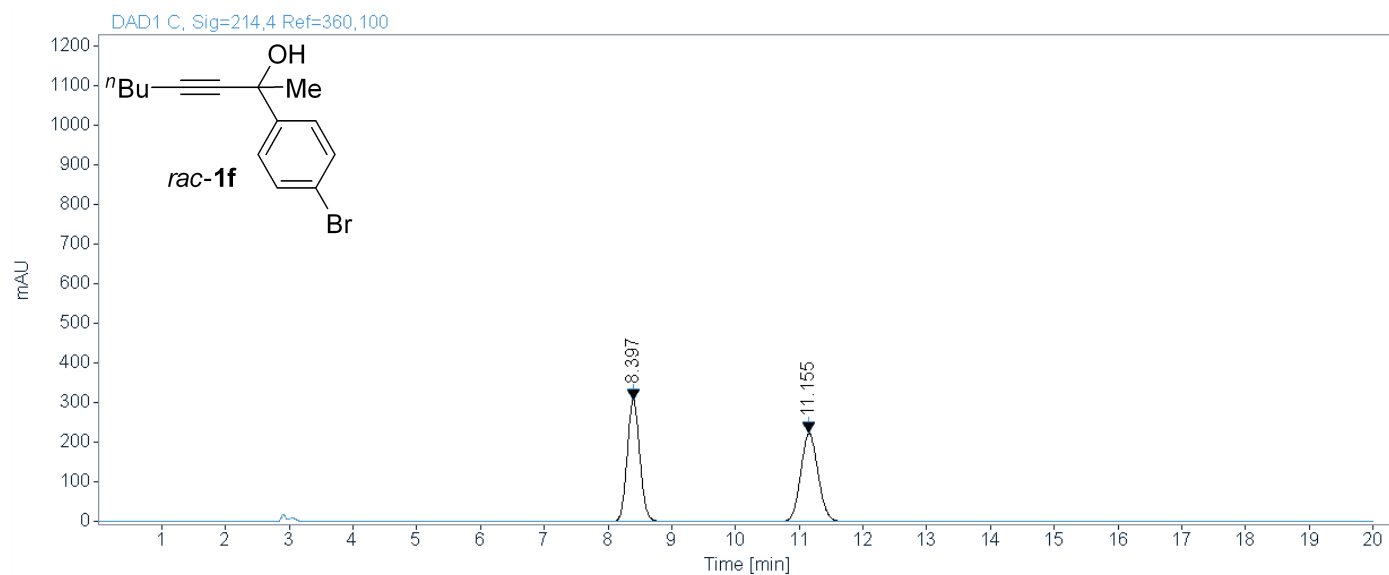

Signal: DAD1 C, Sig=214,4 Ref=360,100

| RT [min] | Width [min] | Height   | Area      | Area%    |
|----------|-------------|----------|-----------|----------|
| 8.397    | 0.2152      | 307.5428 | 4248.5869 | 49.9716  |
| 11.155   | 0.2989      | 222.6530 | 4253.4209 | 50.0284  |
| Sum      |             |          | 8502.0078 | 100.0000 |

wj-1-032-1-H  
Jul 24 2019  
SOLVENT: CDCl3  
NA = 4  
F1 = 400.130005 MHz  
F2 = 1.000000 MHz

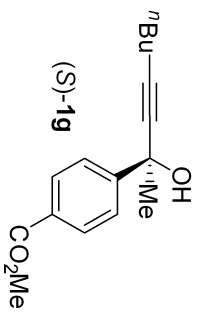

8.013  
7.992  
7.718  
7.698  
7.270

3.906

1.732  
2.636  
2.286  
2.269  
2.251  
1.564  
1.546  
1.528  
1.509  
1.491  
1.469  
1.451  
1.432  
1.414  
1.396  
1.378  
0.939  
0.920  
0.903  
-0.000

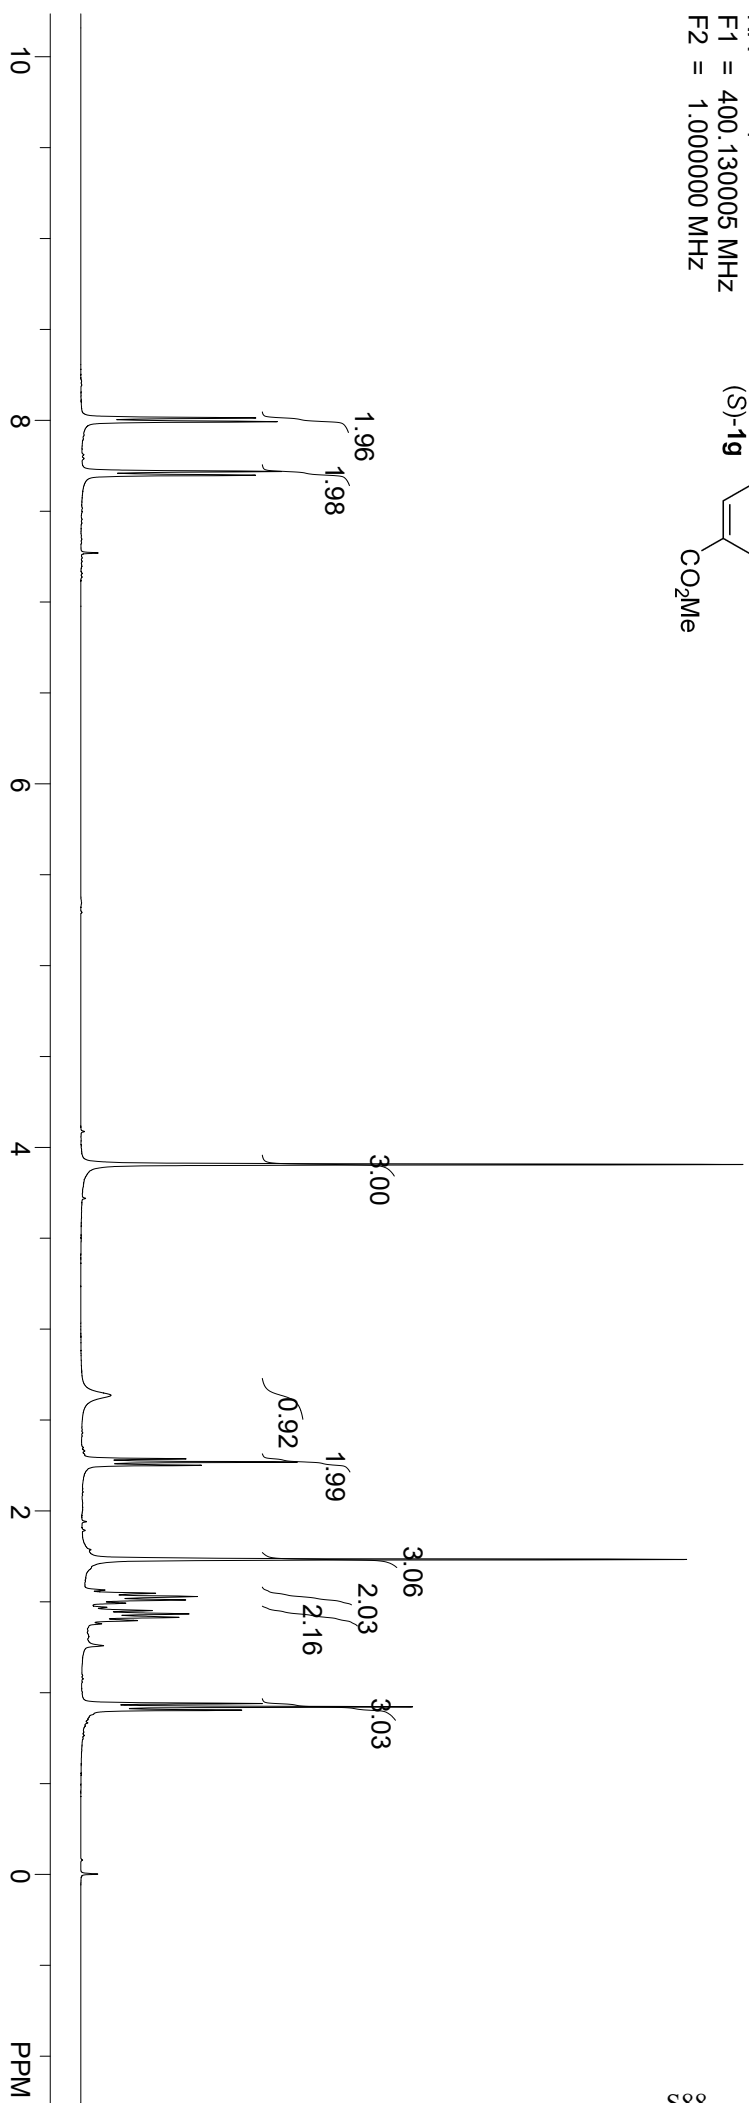



wj-1-032-1-C  
Jul 24 2019  
SOLVENT: CDCl3  
NA = 150  
F1 = 100.612770 MHz  
F2 = 1.000000 MHz

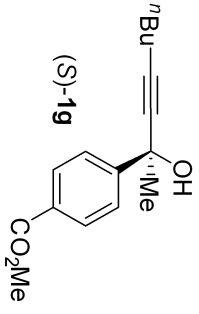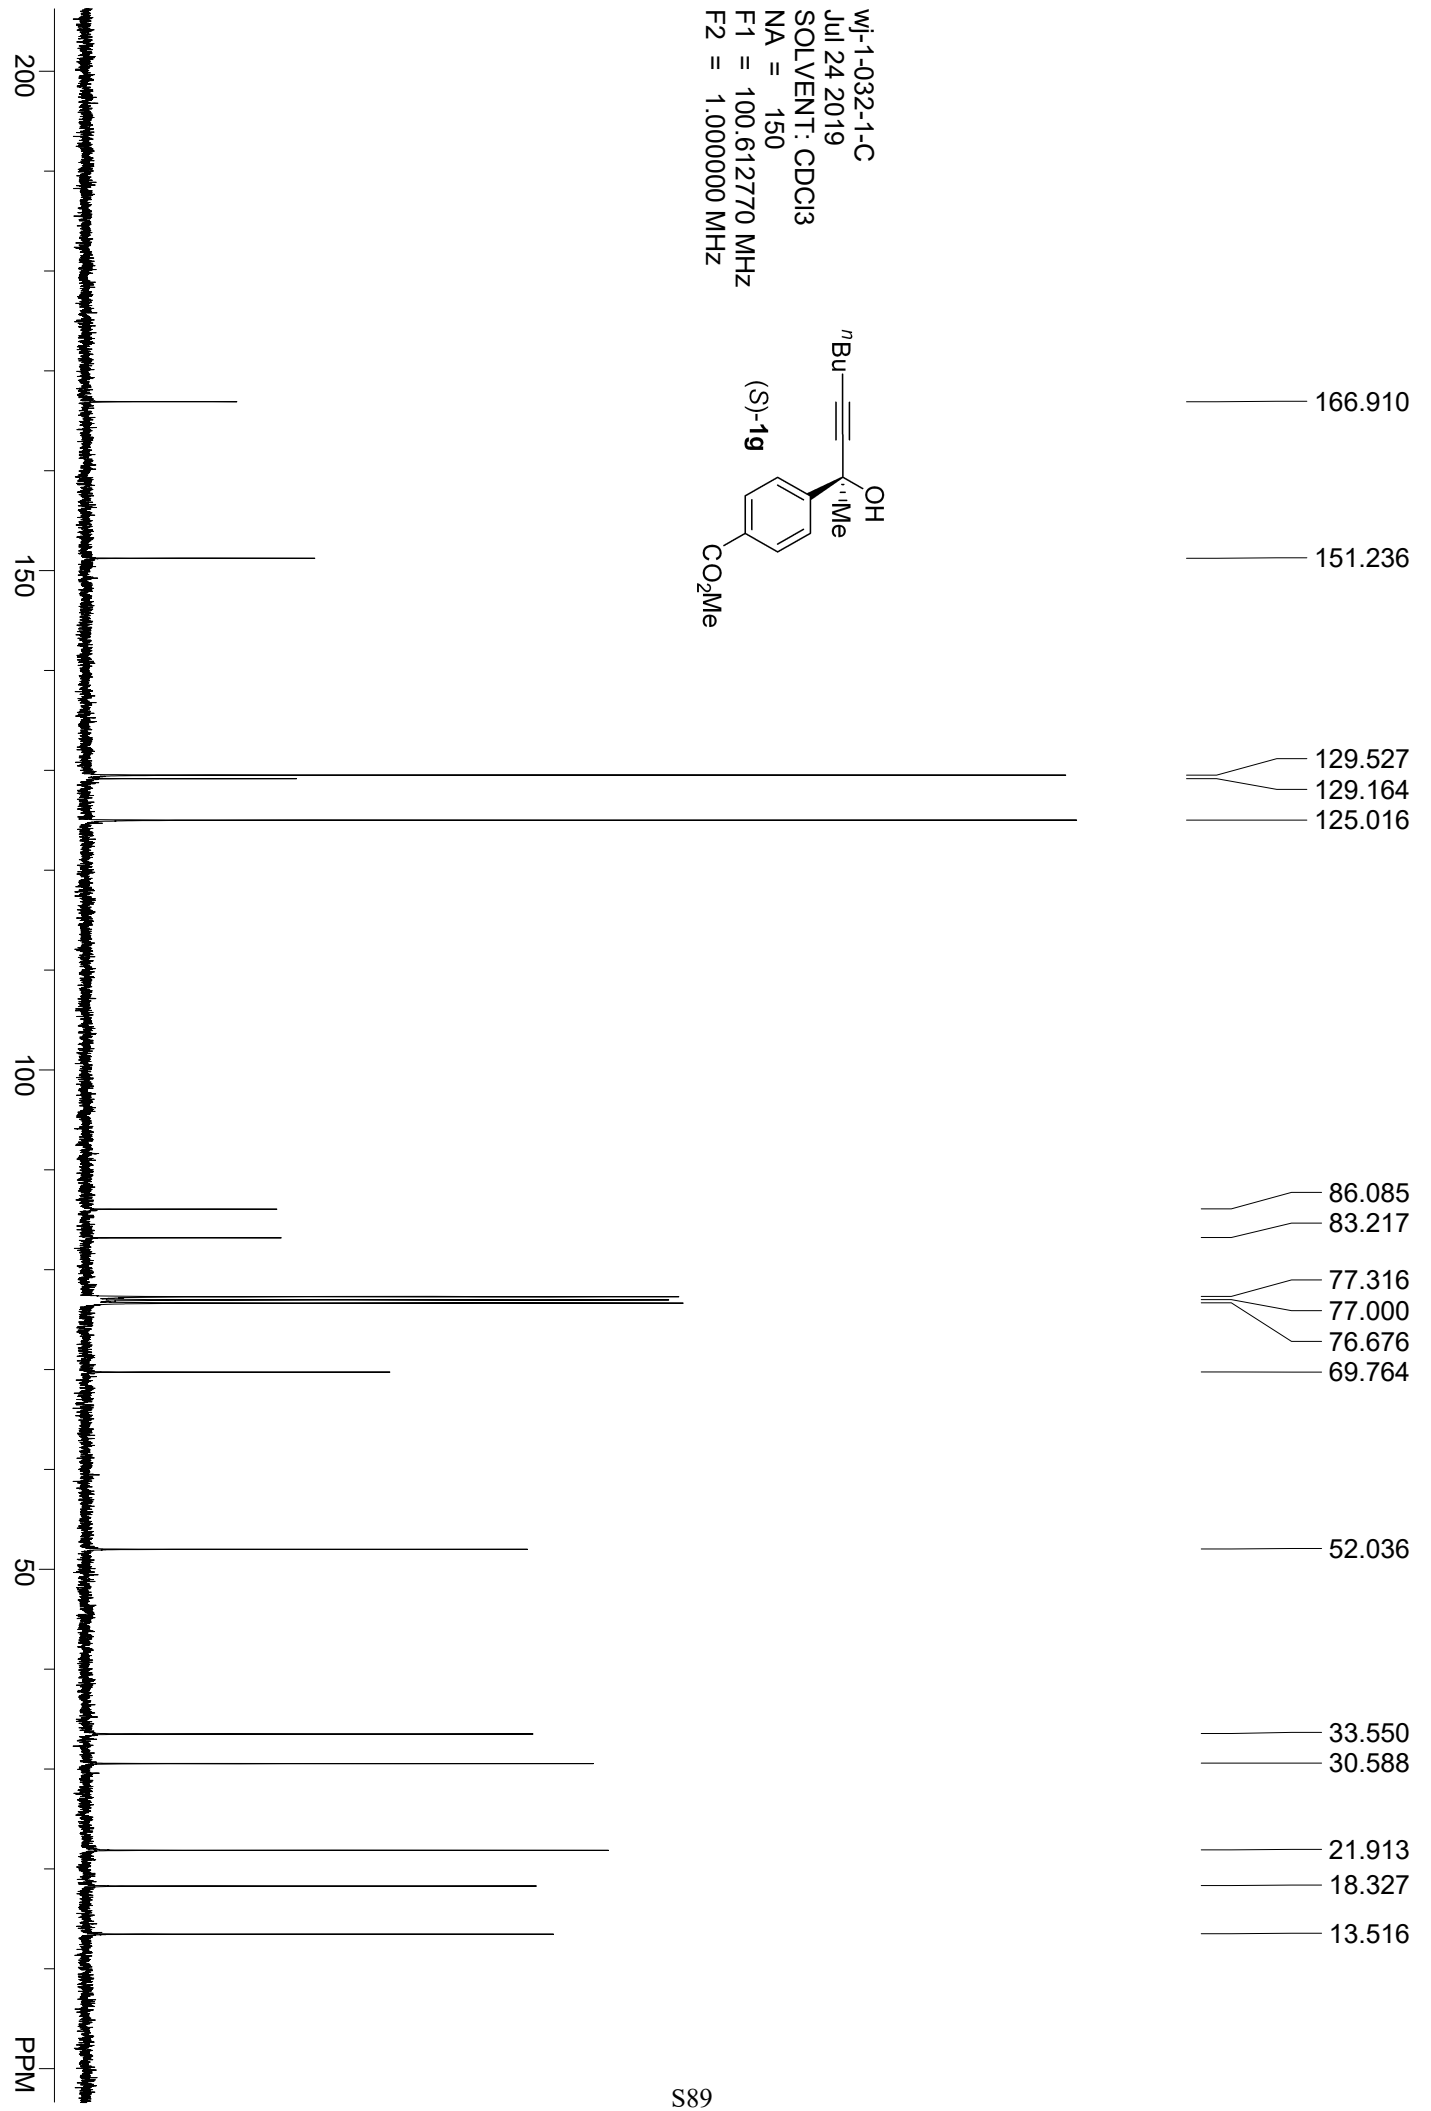

# Area Percent Report

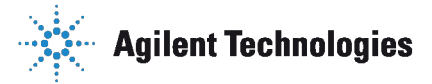

sample wj-1-032-1-AS-H-90-10-1.0-214

Data file: C:\Users\Public\Documents\ChemStation\1\Data\WJ\_LC 2019-07-24 08-34-00\030-P2-C3-wj-1-032-1.D

## Acquisition Data:

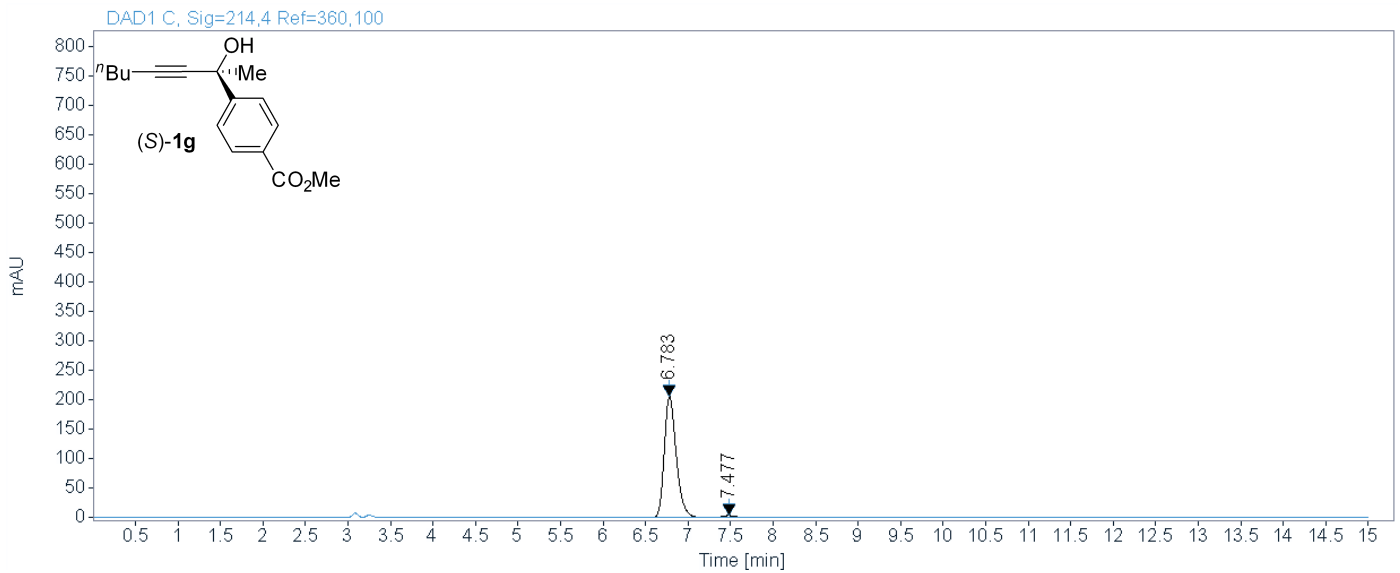

Signal: DAD1 C, Sig=214,4 Ref=360,100

| RT [min] | Width [min] | Height   | Area      | Area%    |
|----------|-------------|----------|-----------|----------|
| 6.783    | 0.1484      | 206.8252 | 2027.9703 | 98.4971  |
| 7.477    | 0.1532      | 3.1326   | 30.9439   | 1.5029   |
|          |             | Sum      | 2058.9142 | 100.0000 |

# Area Percent Report



sample wj-1-032-1-rac-AS-H-90-10-1.0-214

Data file: C:\Users\Public\Documents\ChemStation\1\Data\WJ\_LC 2019-07-24 08-34-00\031-P2-C4-wj-1-032-1-rac.D

## Acquisition Data:

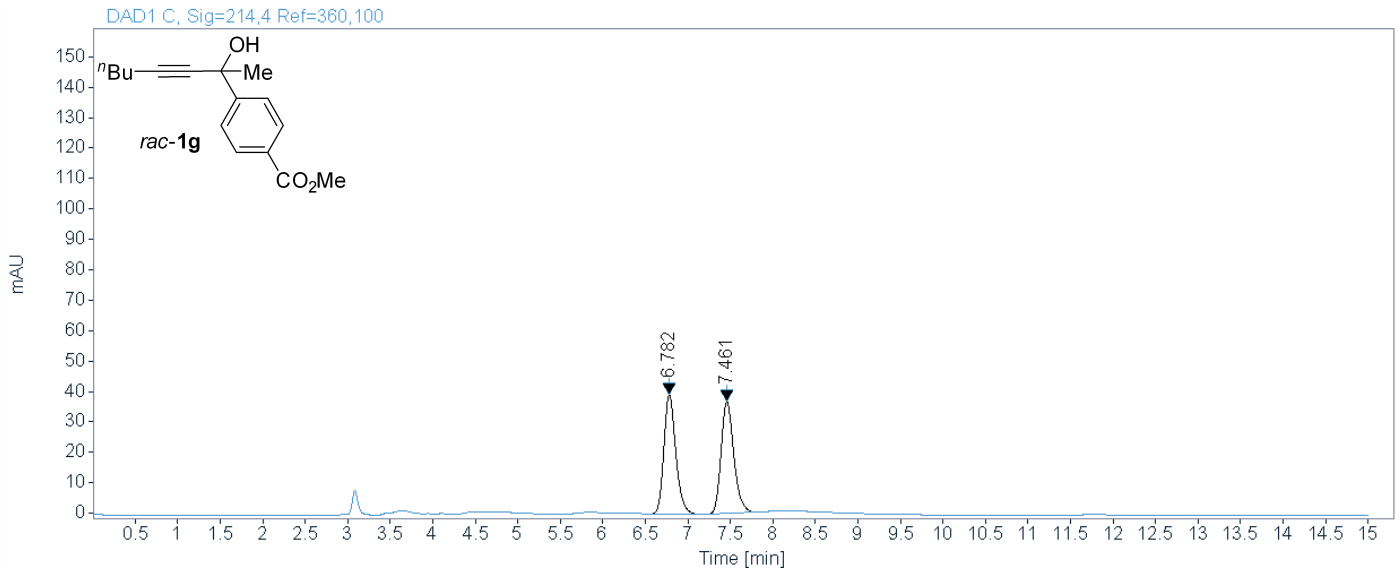

Signal: DAD1 C, Sig=214,4 Ref=360,100

| RT [min] | Width [min] | Height  | Area     | Area%    |
|----------|-------------|---------|----------|----------|
| 6.782    | 0.1502      | 39.5373 | 386.8459 | 50.1070  |
| 7.461    | 0.1618      | 36.8955 | 385.1939 | 49.8930  |
|          |             | Sum     | 772.0398 | 100.0000 |

WJ-4-134-H  
 Oct 12 2021  
 SOLVENT: CDCl3  
 NA = 4  
 F1 = 400.130005 MHz  
 F2 = 1.000000 MHz

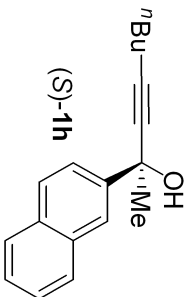

- 8.118
- 8.115
- 7.859
- 7.852
- 7.837
- 7.816
- 7.808
- 7.752
- 7.747
- 7.730
- 7.726
- 7.493
- 7.481
- 7.476
- 7.467
- 7.458
- 7.453
- 7.441
- 7.240

- 2.473
- 2.327
- 2.309
- 2.291
- 1.598
- 1.581
- 1.561
- 1.823
- 1.543
- 1.526
- 1.505
- 1.488
- 1.470
- 1.449
- 1.431
- 0.958
- 0.940
- 0.922
- 0.000

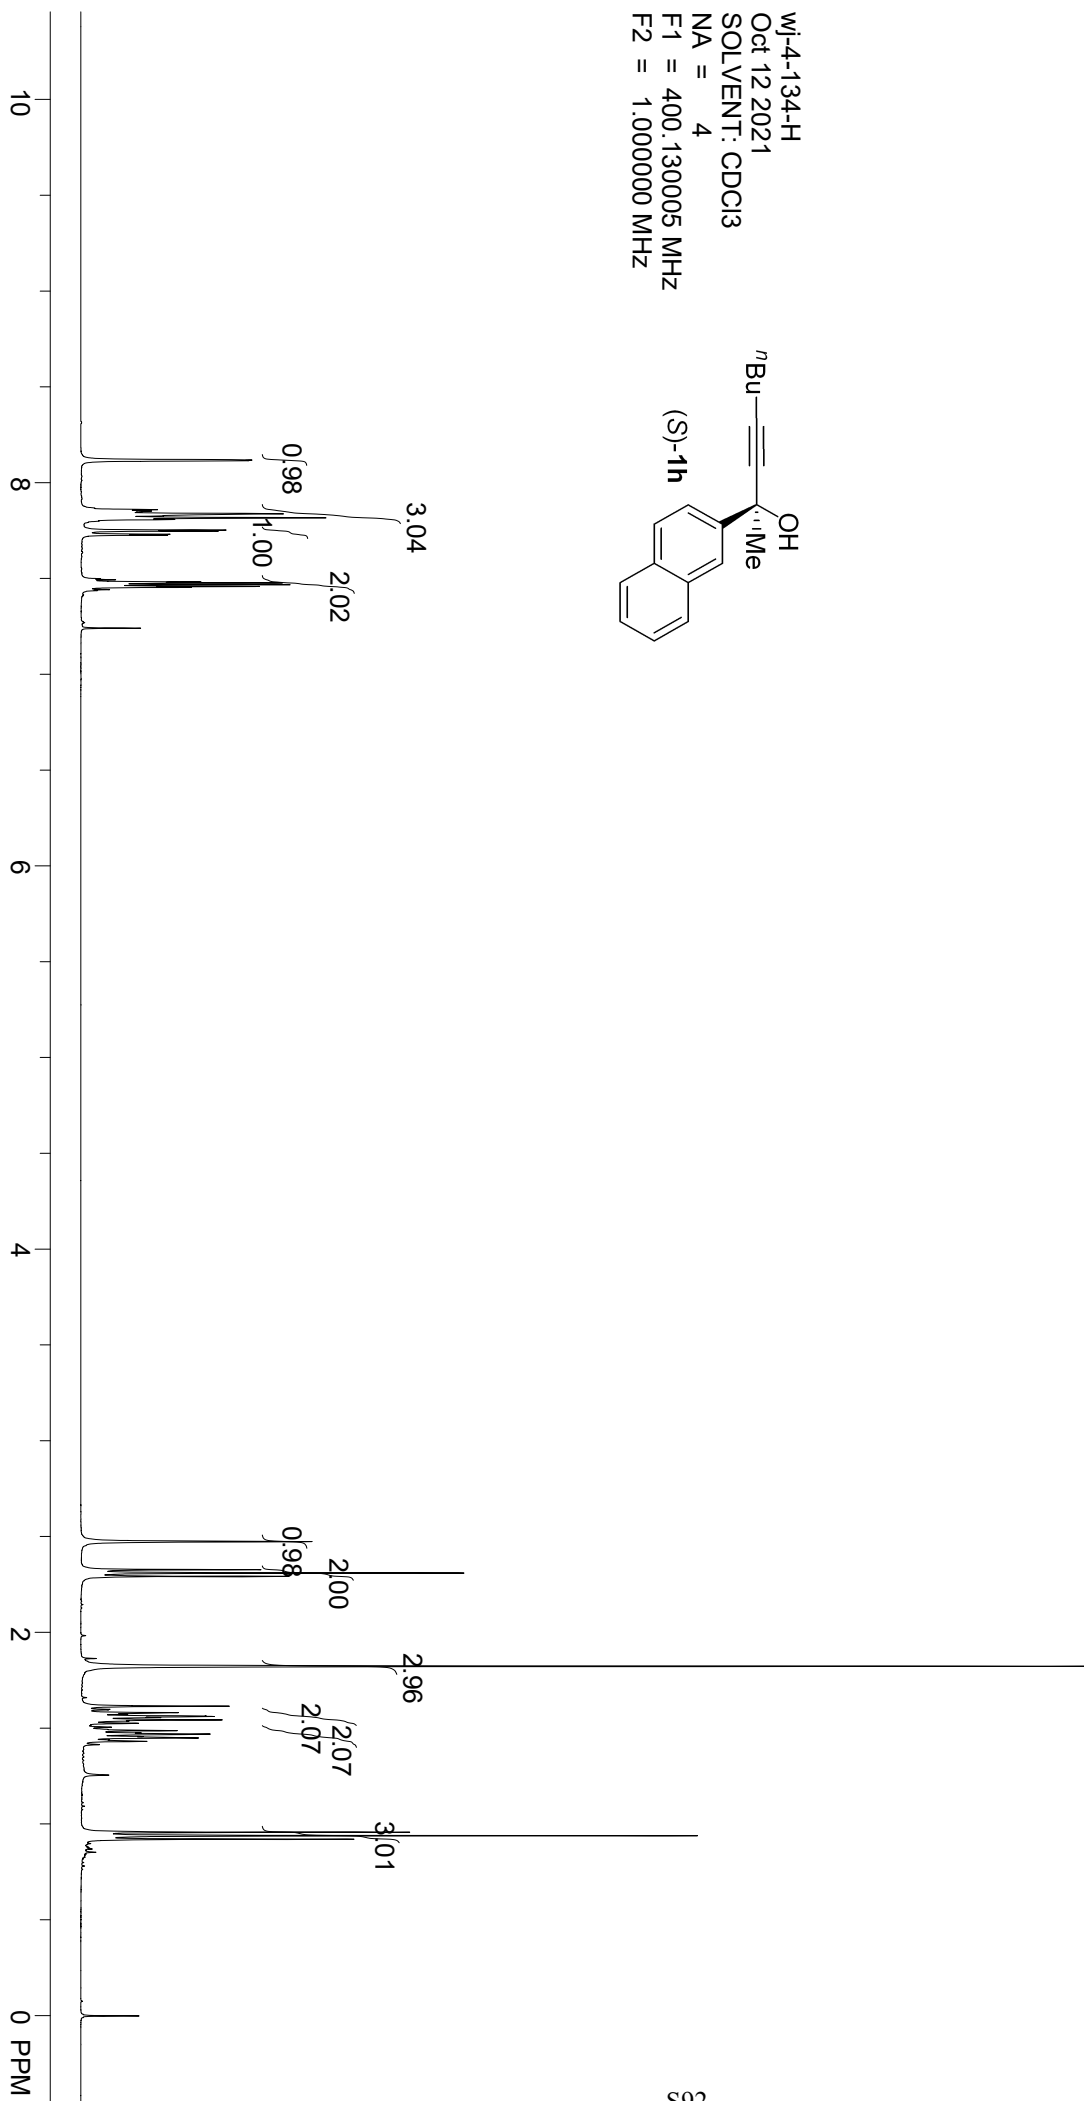

wj-4-134-C  
Oct 12 2021  
SOLVENT: CDCl3  
NA = 200  
F1 = 100.612770 MHz  
F2 = 1.000000 MHz

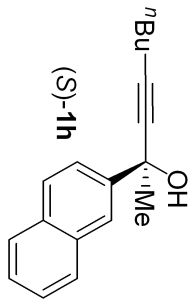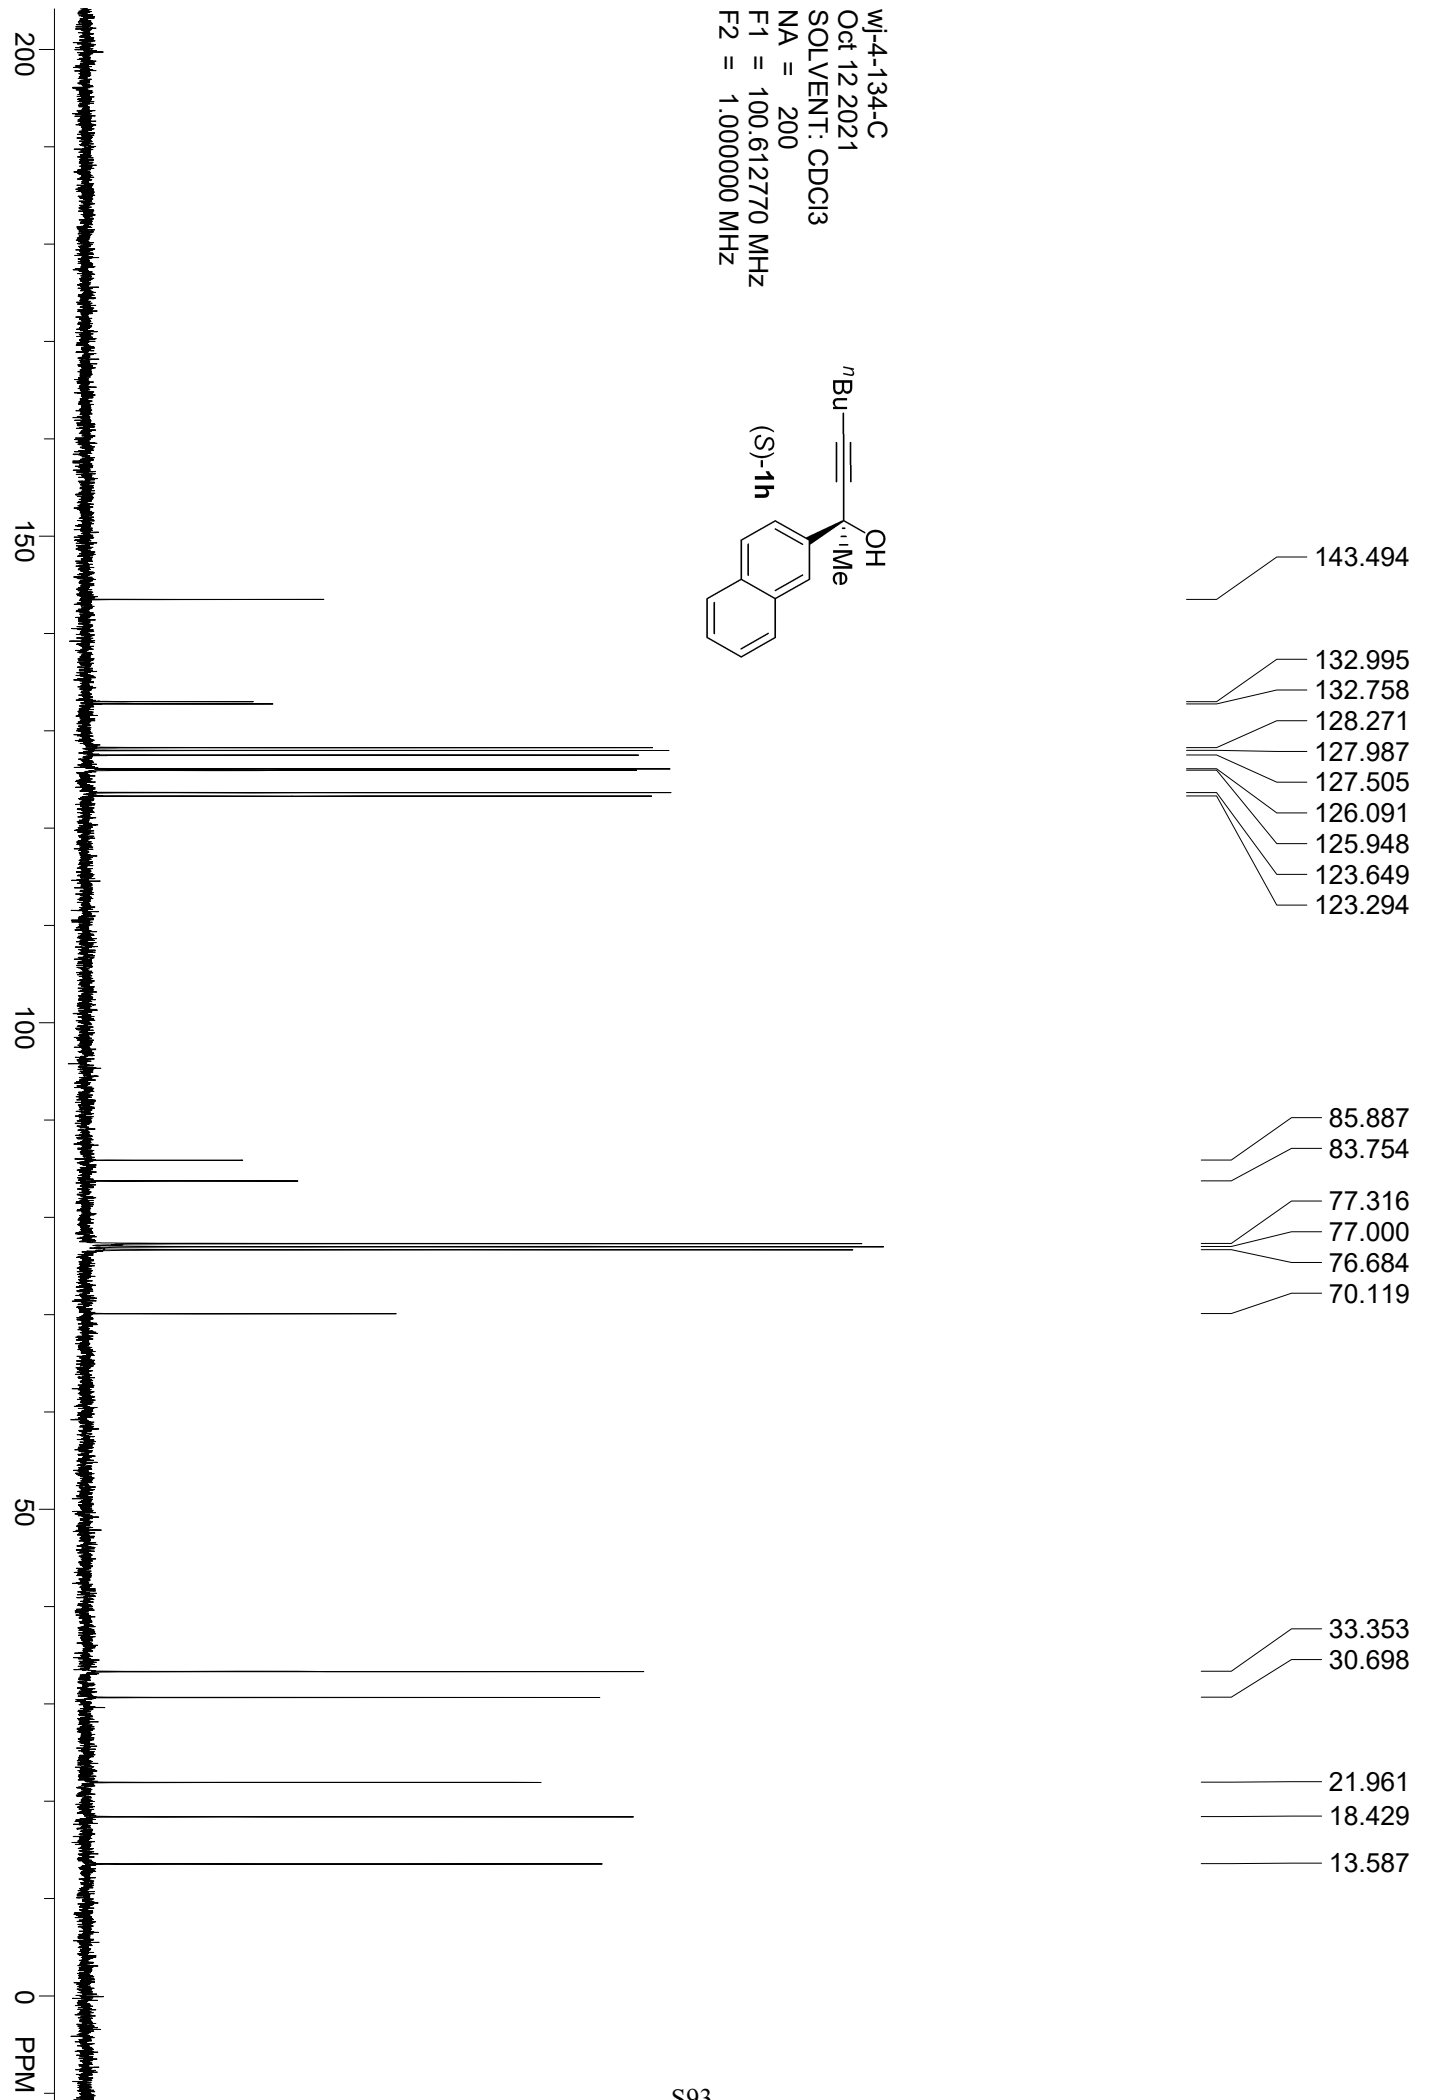

# Area Percent Report

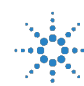

Agilent Technologies

sample wj-4-134-AS-H-95-5-1.0-214

Data file: C:\Users\Public\Documents\ChemStation\1\Data\WJ\_LC 2021-10-12 15-26-33\002-P2-C1-wj-4-134.D

## Acquisition Data:

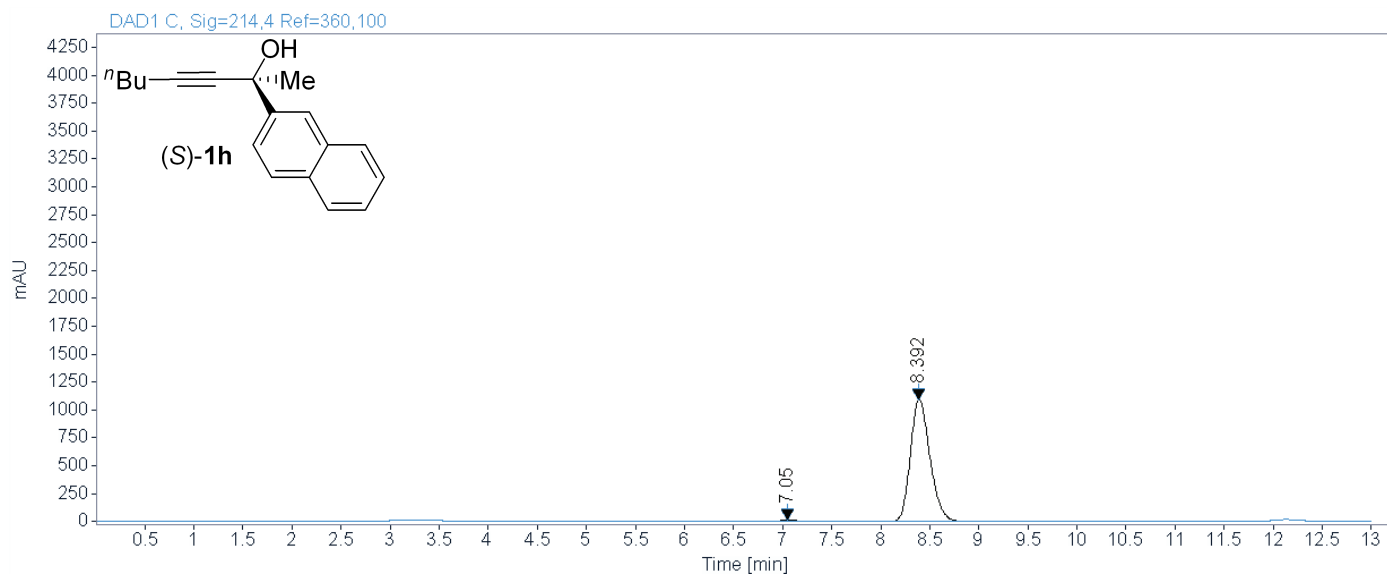

Signal: DAD1 C, Sig=214,4 Ref=360,100

| RT [min] | Width [min] | Height    | Area       | Area%    |
|----------|-------------|-----------|------------|----------|
| 7.050    | 0.1655      | 15.7134   | 171.7532   | 1.1175   |
| 8.392    | 0.2140      | 1094.6259 | 15198.0674 | 98.8825  |
| Sum      |             |           | 15369.8206 | 100.0000 |

# Area Percent Report



Agilent Technologies

sample wj-4-134-rac-AS-H-95-5-1.0-214

Data file: C:\Users\Public\Documents\ChemStation\1\Data\WJ\_LC 2021-10-12 15-26-33\003-P2-C2-wj-4-134--rac.D

## Acquisition Data:

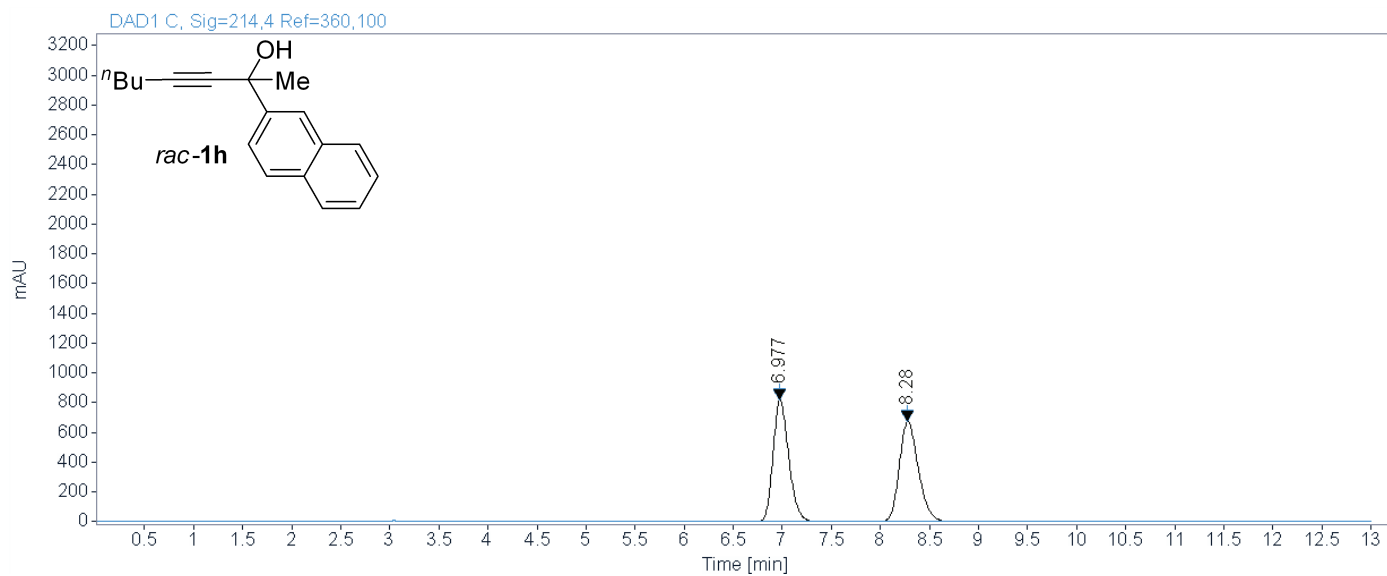

Signal: DAD1 C, Sig=214,4 Ref=360,100

| RT [min] | Width [min] | Height   | Area       | Area%    |
|----------|-------------|----------|------------|----------|
| 6.977    | 0.1845      | 821.0001 | 9090.6621  | 50.0233  |
| 8.280    | 0.2071      | 674.5023 | 9082.1826  | 49.9767  |
|          | Sum         |          | 18172.8447 | 100.0000 |

wj-1-038-1-H  
Aug 28 2019  
SOLVENT: CDCl3  
NA = 4  
F1 = 400.130005 MHz  
F2 = 1.000000 MHz

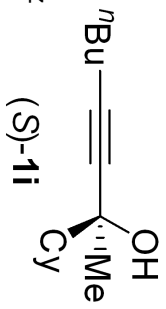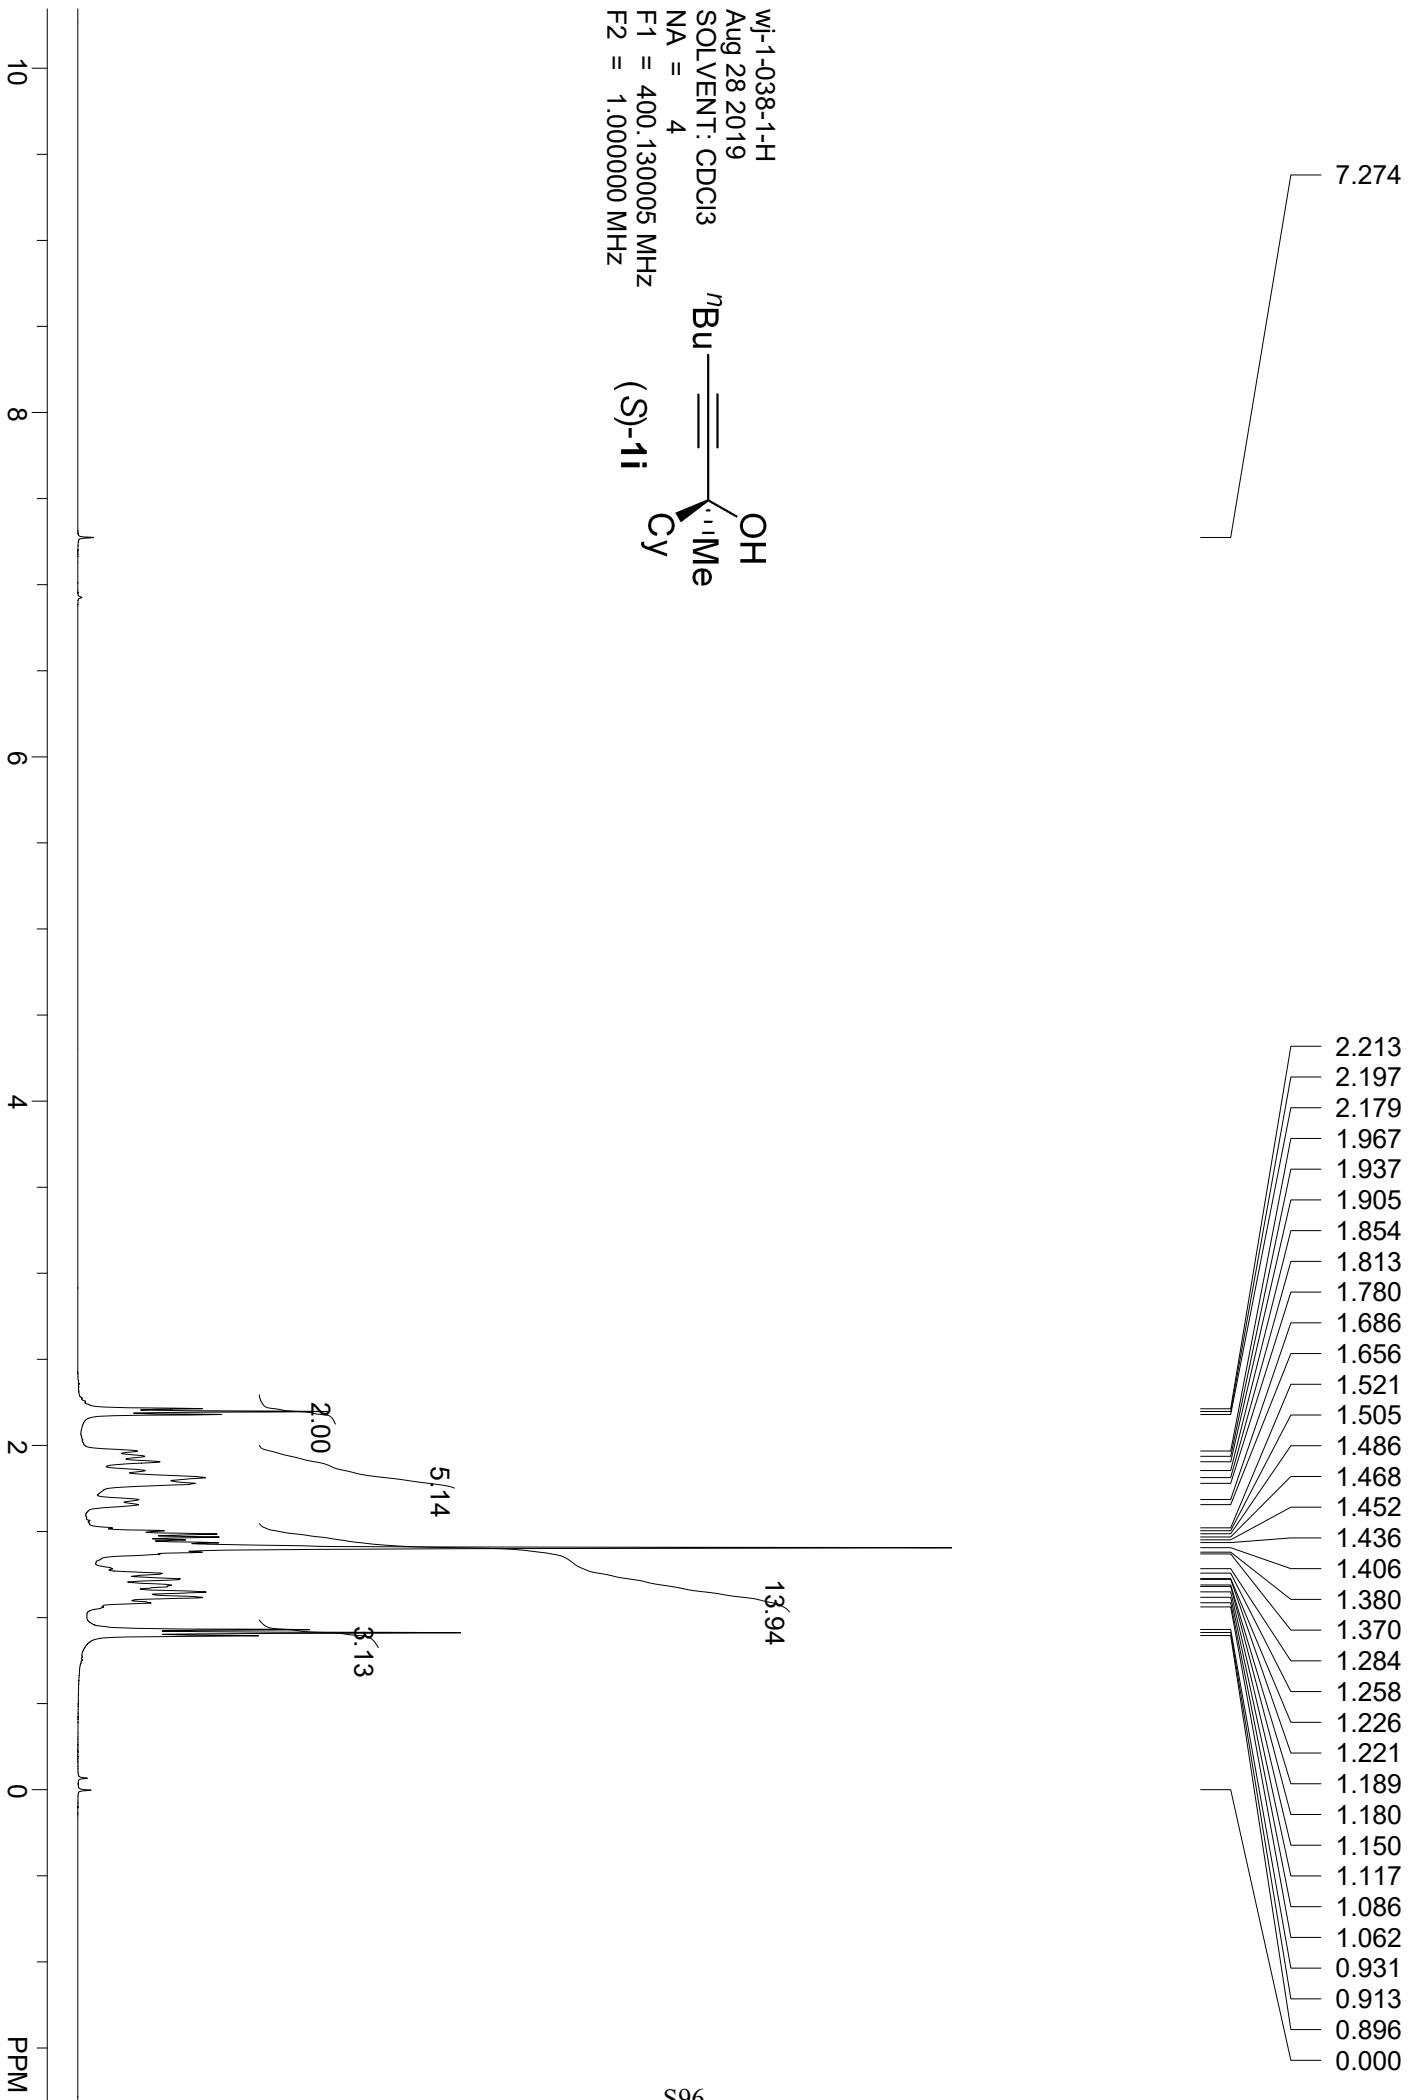



wj-1-038-1-C  
Aug 28 2019  
SOLVENT: CDCl3  
NA = 250  
F1 = 100.623833 MHz  
F2 = 1.000000 MHz

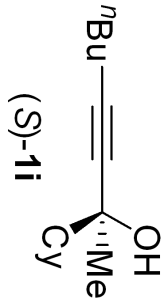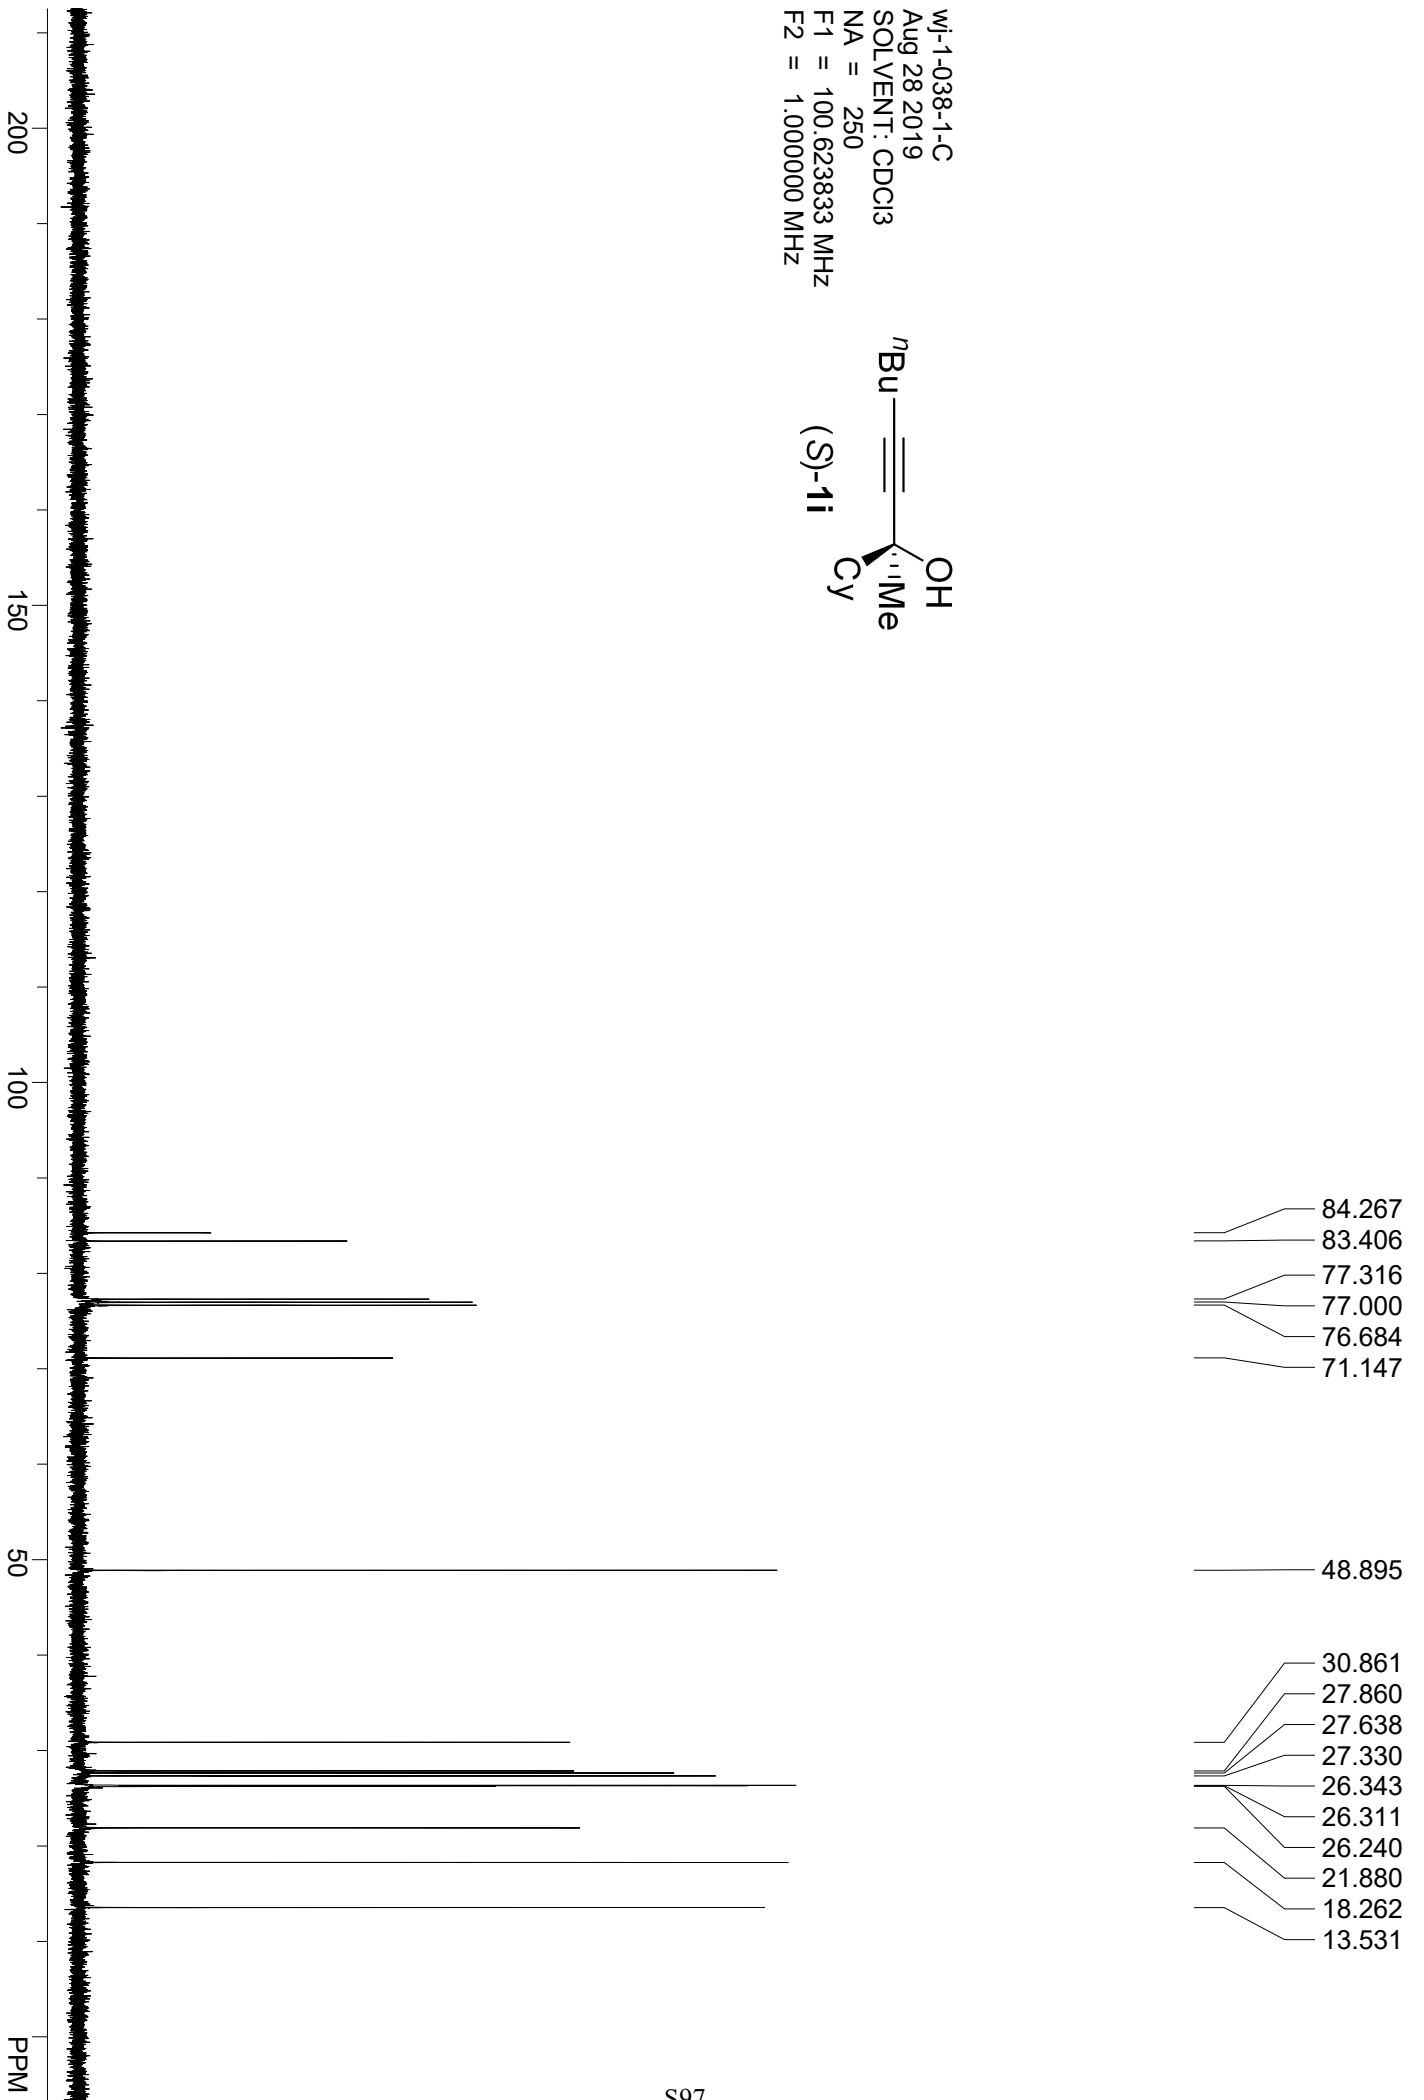

# Area Percent Report



sample wj-1-038-1-AS-H-98-2-1.0-214

Data file: C:\Users\Public\Documents\ChemStation\1\Data\DEF\_LC 2019-09-04 09-57-05\035-P2-C1-wj-1-038-1.D

## Acquisition Data:

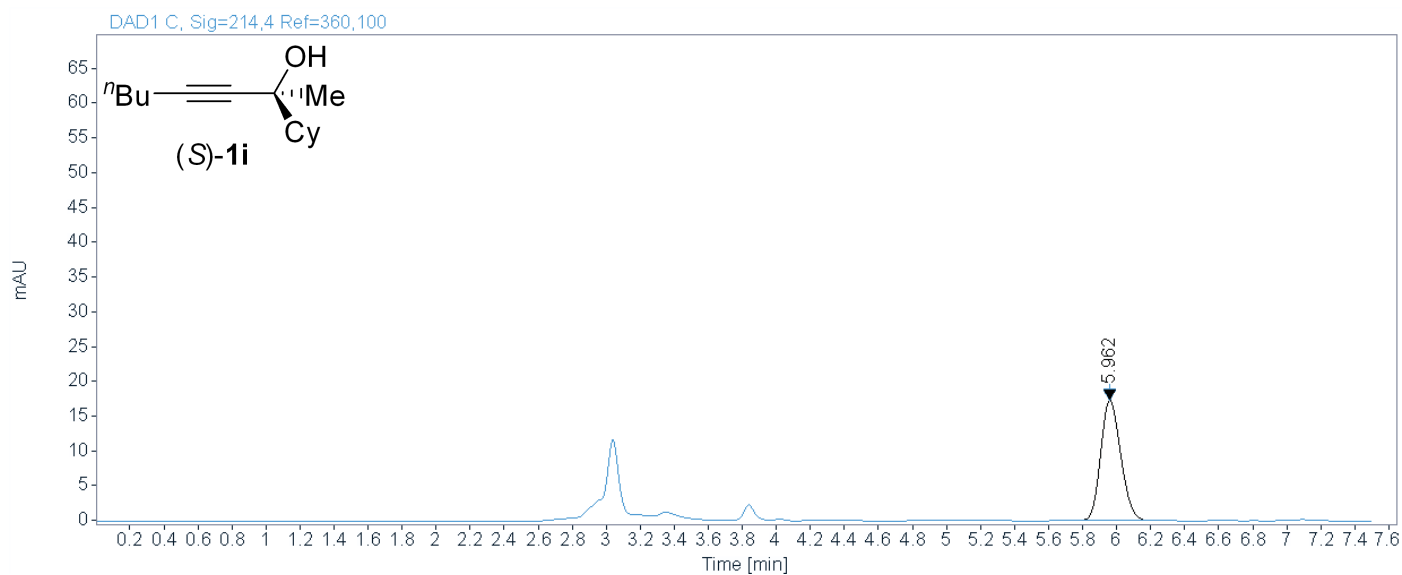

Signal: DAD1 C, Sig=214,4 Ref=360,100

| RT [min] | Width [min] | Height  | Area     | Area%    |
|----------|-------------|---------|----------|----------|
| 5.962    | 0.1273      | 17.3202 | 141.5171 | 100.0000 |
| Sum      |             |         | 141.5171 | 100.0000 |

# Area Percent Report



Agilent Technologies

sample wj-1-038-1-rac-AS-H-98-2-1.0-214

Data file: C:\Users\Public\Documents\ChemStation\1\Data\DEF\_LC 2019-09-04 09-57-05\037-P2-C2-wj-1-038-1-rac.D

## Acquisition Data:

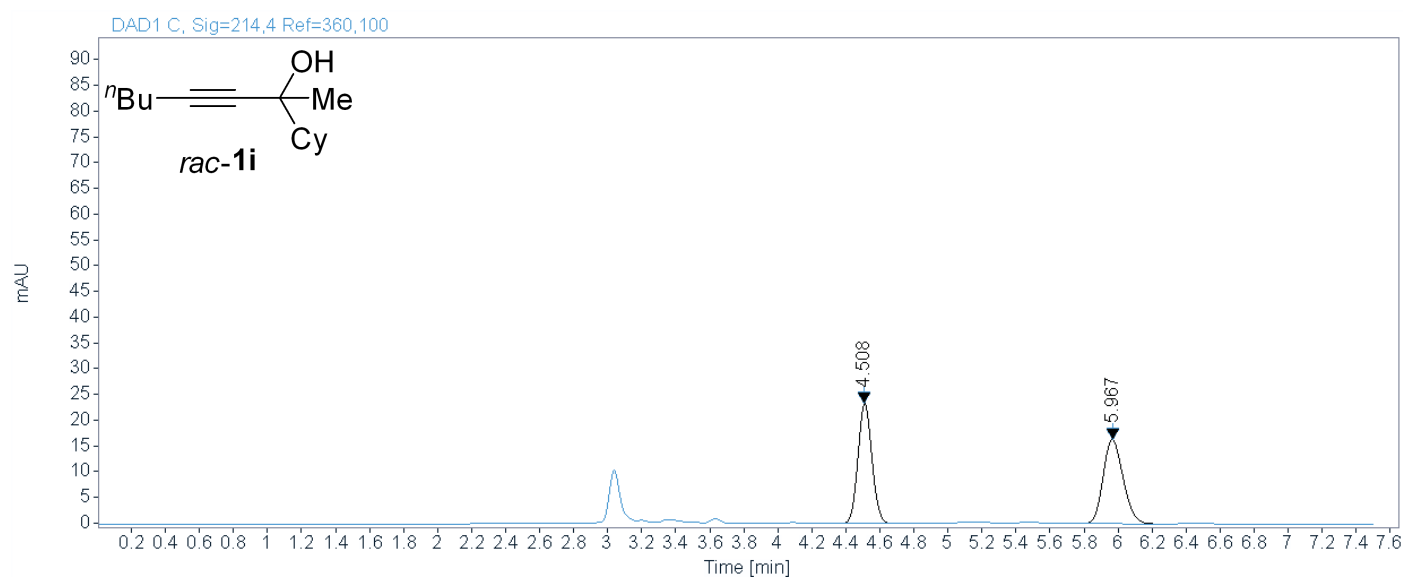

Signal: DAD1 C, Sig=214,4 Ref=360,100

| RT [min] | Width [min] | Height  | Area     | Area%    |
|----------|-------------|---------|----------|----------|
| 4.508    | 0.0888      | 23.4767 | 134.3593 | 49.9786  |
| 5.967    | 0.1279      | 16.3616 | 134.4742 | 50.0214  |
| Sum      |             |         | 268.8335 | 100.0000 |

wf-1-055-1-H  
Sep 16 2019  
SOLVENT: CDCl3  
NA = 4  
F1 = 400.130035 MHz  
F2 = 1.000000 MHz

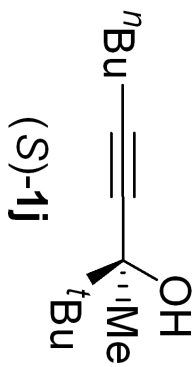

7.271

2.218  
2.202  
2.184  
1.815  
1.524  
1.508  
1.489  
1.471  
1.455  
1.438  
1.411  
1.384  
1.030  
0.930  
0.912  
0.894  
0.000

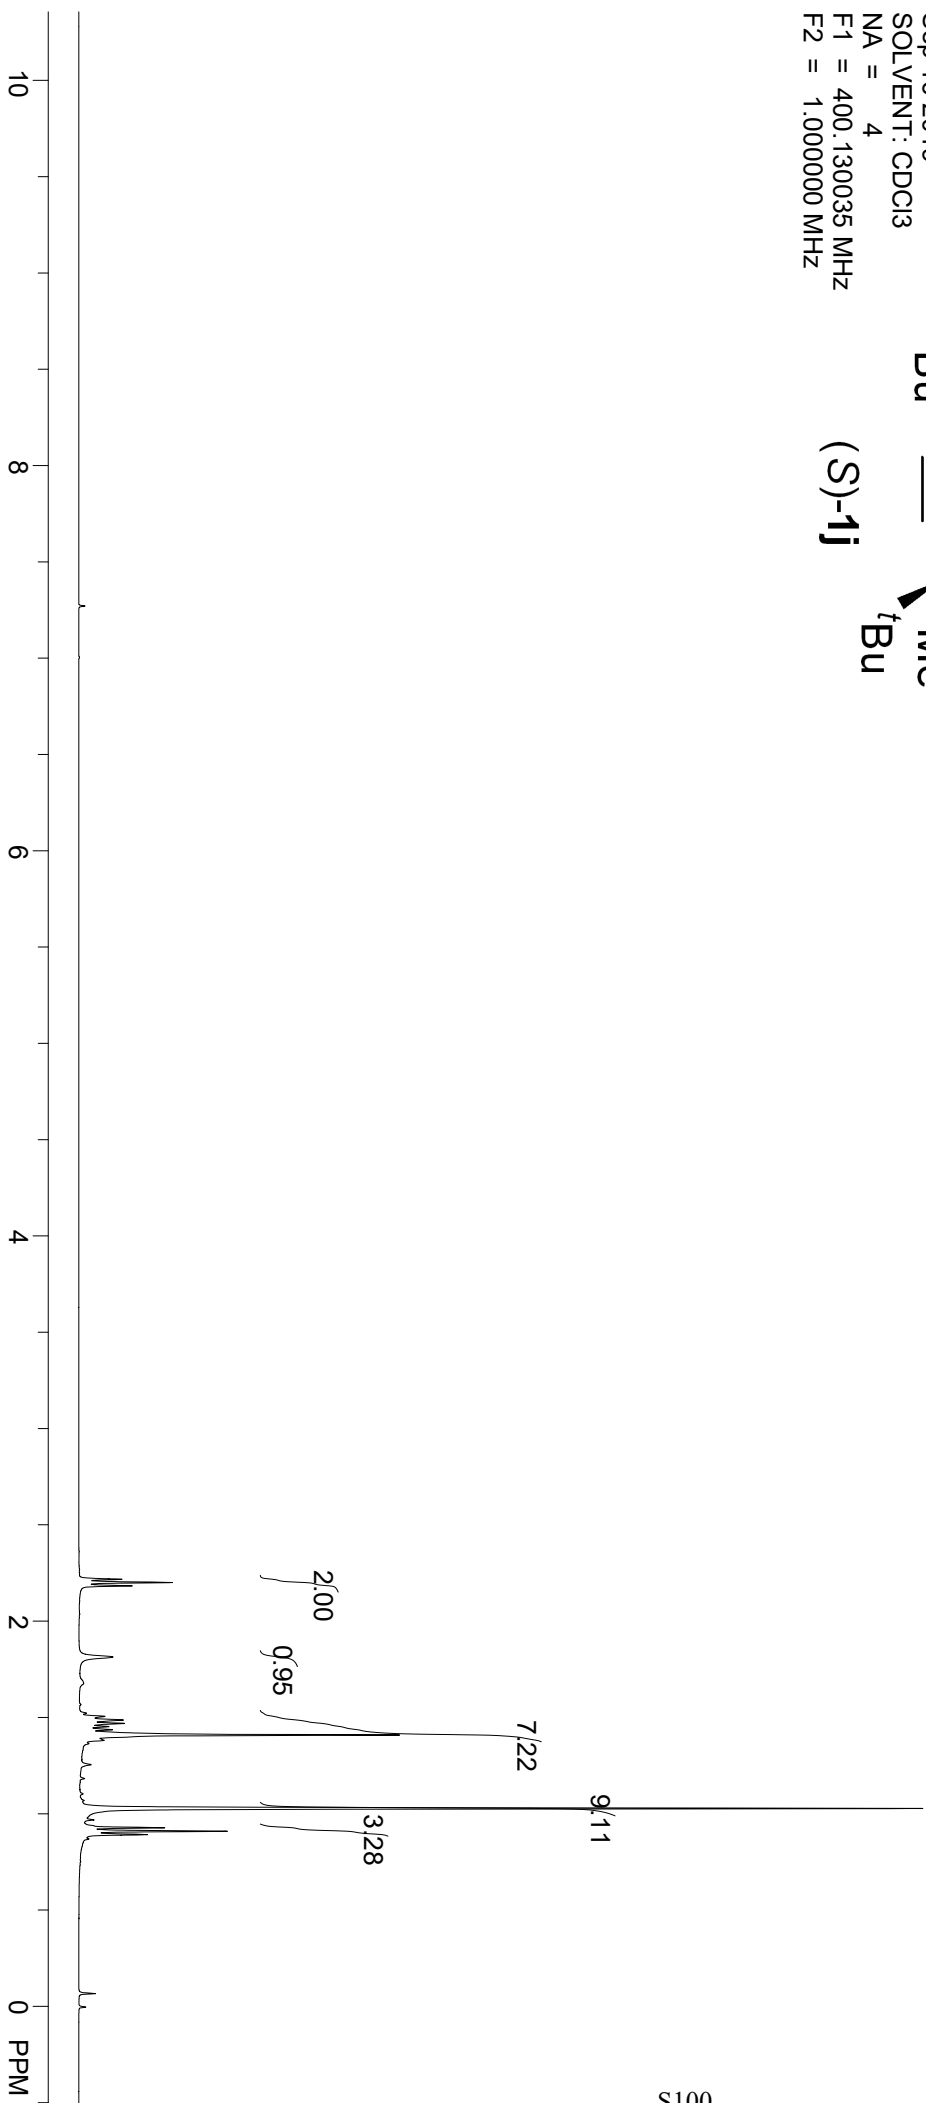

wj-1-055-1-C  
Sep 16 2019  
SOLVENT: CDCl3  
NA = 128  
F1 = 100.612770 MHz  
F2 = 1.000000 MHz

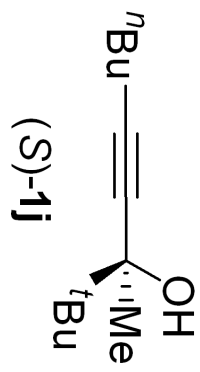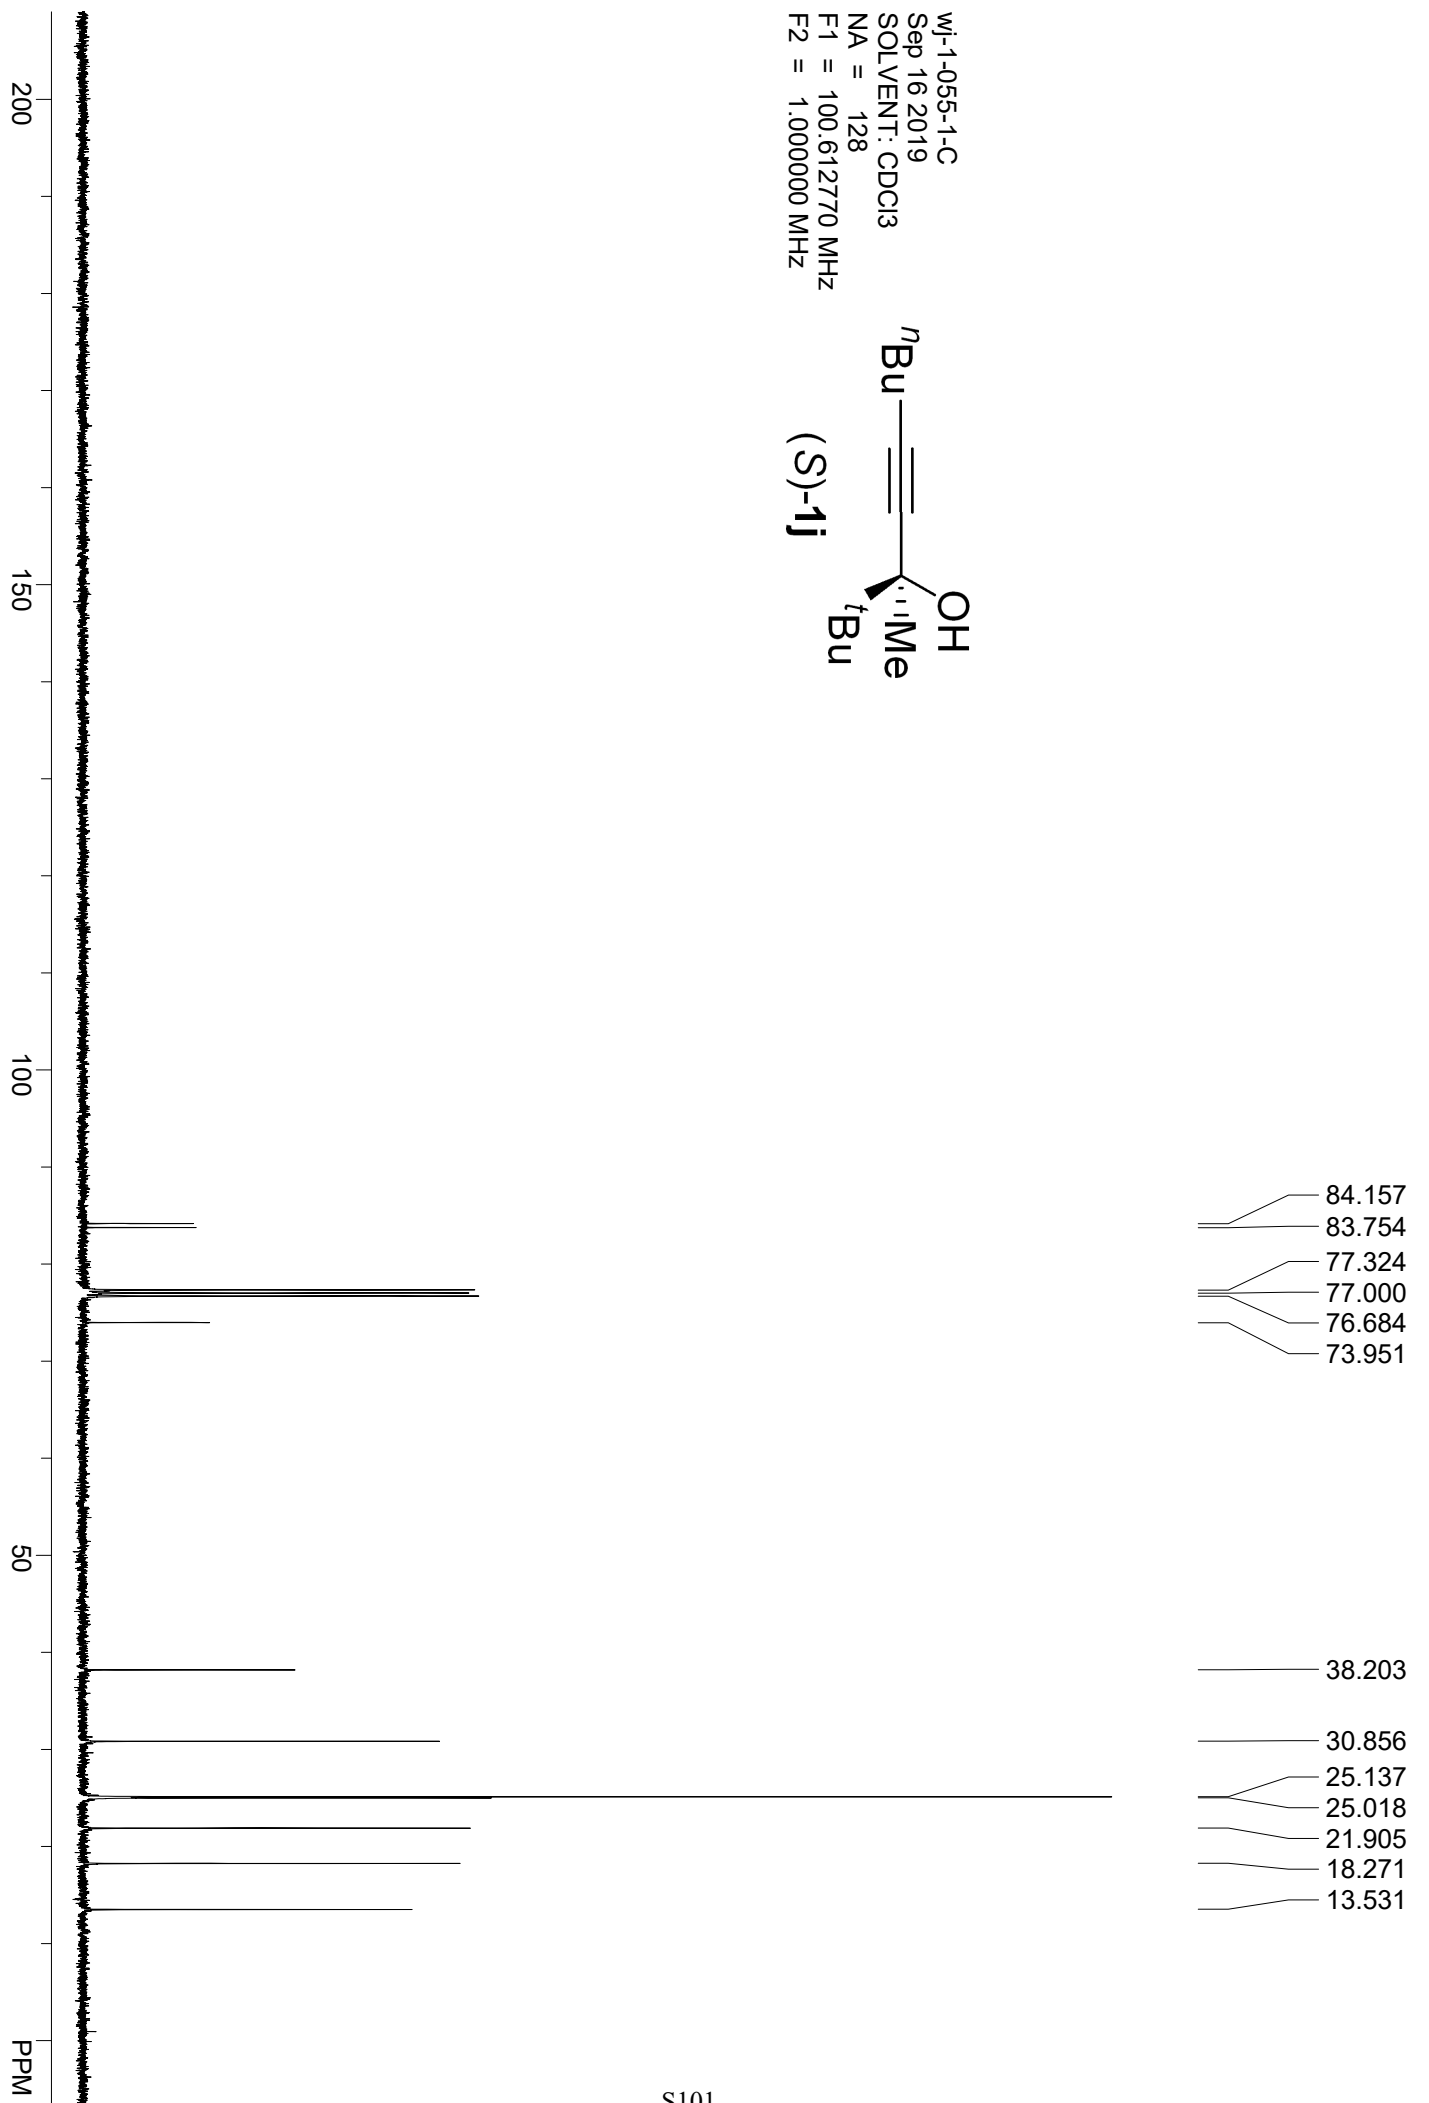

# Area Percent Report



sample wj-1-055-1-IC-98-2-1.0-214

Data file: C:\Users\Public\Documents\ChemStation\1\Data\wgl 2019-09-17 09-02-49\060-P2-C5-wj-1-055-1.D

## Acquisition Data:

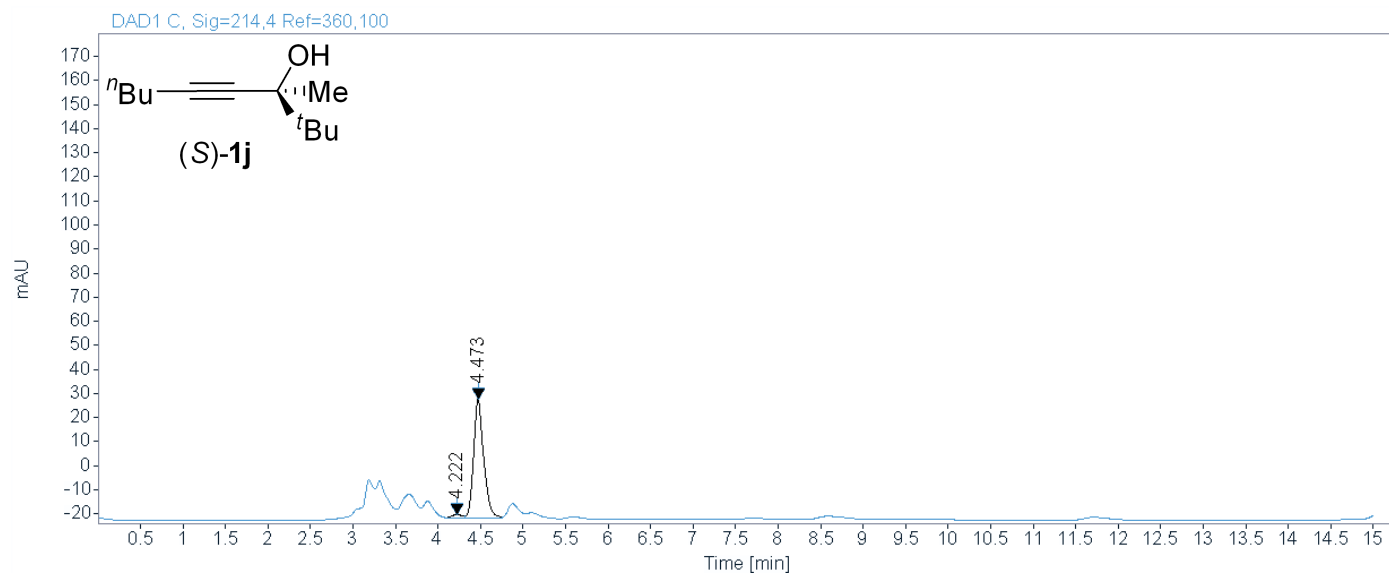

Signal: DAD1 C, Sig=214,4 Ref=360,100

| RT [min] | Width [min] | Height  | Area     | Area%    |
|----------|-------------|---------|----------|----------|
| 4.222    | 0.1355      | 1.2791  | 10.3955  | 2.4737   |
| 4.473    | 0.1379      | 49.5485 | 409.8443 | 97.5263  |
|          |             | Sum     | 420.2397 | 100.0000 |

# Area Percent Report



sample wj-1-055-1-rac-IC-98-2-1.0-214

Data file: C:\Users\Public\Documents\ChemStation\1\Data\wgl 2019-09-17 09-02-49\061-P2-C6-wj-1-055-1-rac.D

## Acquisition Data:

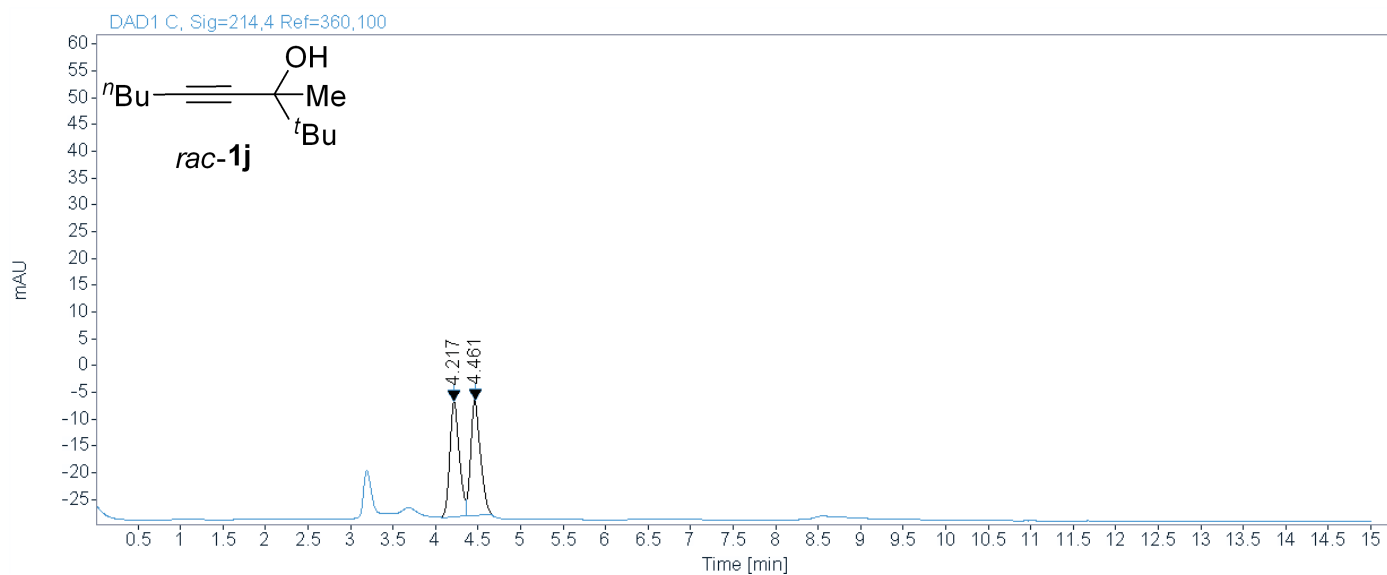

Signal: DAD1 C, Sig=214,4 Ref=360,100

| RT [min] | Width [min] | Height  | Area     | Area%    |
|----------|-------------|---------|----------|----------|
| 4.217    | 0.1301      | 21.6970 | 169.3124 | 49.7421  |
| 4.461    | 0.1315      | 21.6804 | 171.0677 | 50.2579  |
|          |             | Sum     | 340.3801 | 100.0000 |

7.662  
7.643  
7.361  
7.343  
7.324  
7.285  
7.267  
7.248

2.394  
2.375  
2.280  
2.262  
2.244  
1.737  
1.589  
1.571  
1.553  
1.535  
1.517  
1.427  
1.411  
1.403  
1.390  
1.372  
1.356  
1.340  
1.323  
1.304  
1.287  
0.923  
0.905  
0.888  
0.075  
0.000

wj-1-051-1-H  
Sep 11 2019  
SOLVENT: CDCl3  
NA = 4  
F1 = 400.130005 MHz  
F2 = 1.000000 MHz

$nC_5H_{11}$   
**(S)-1k**

C[C@H](O)C#CC1=CC=CC=C1
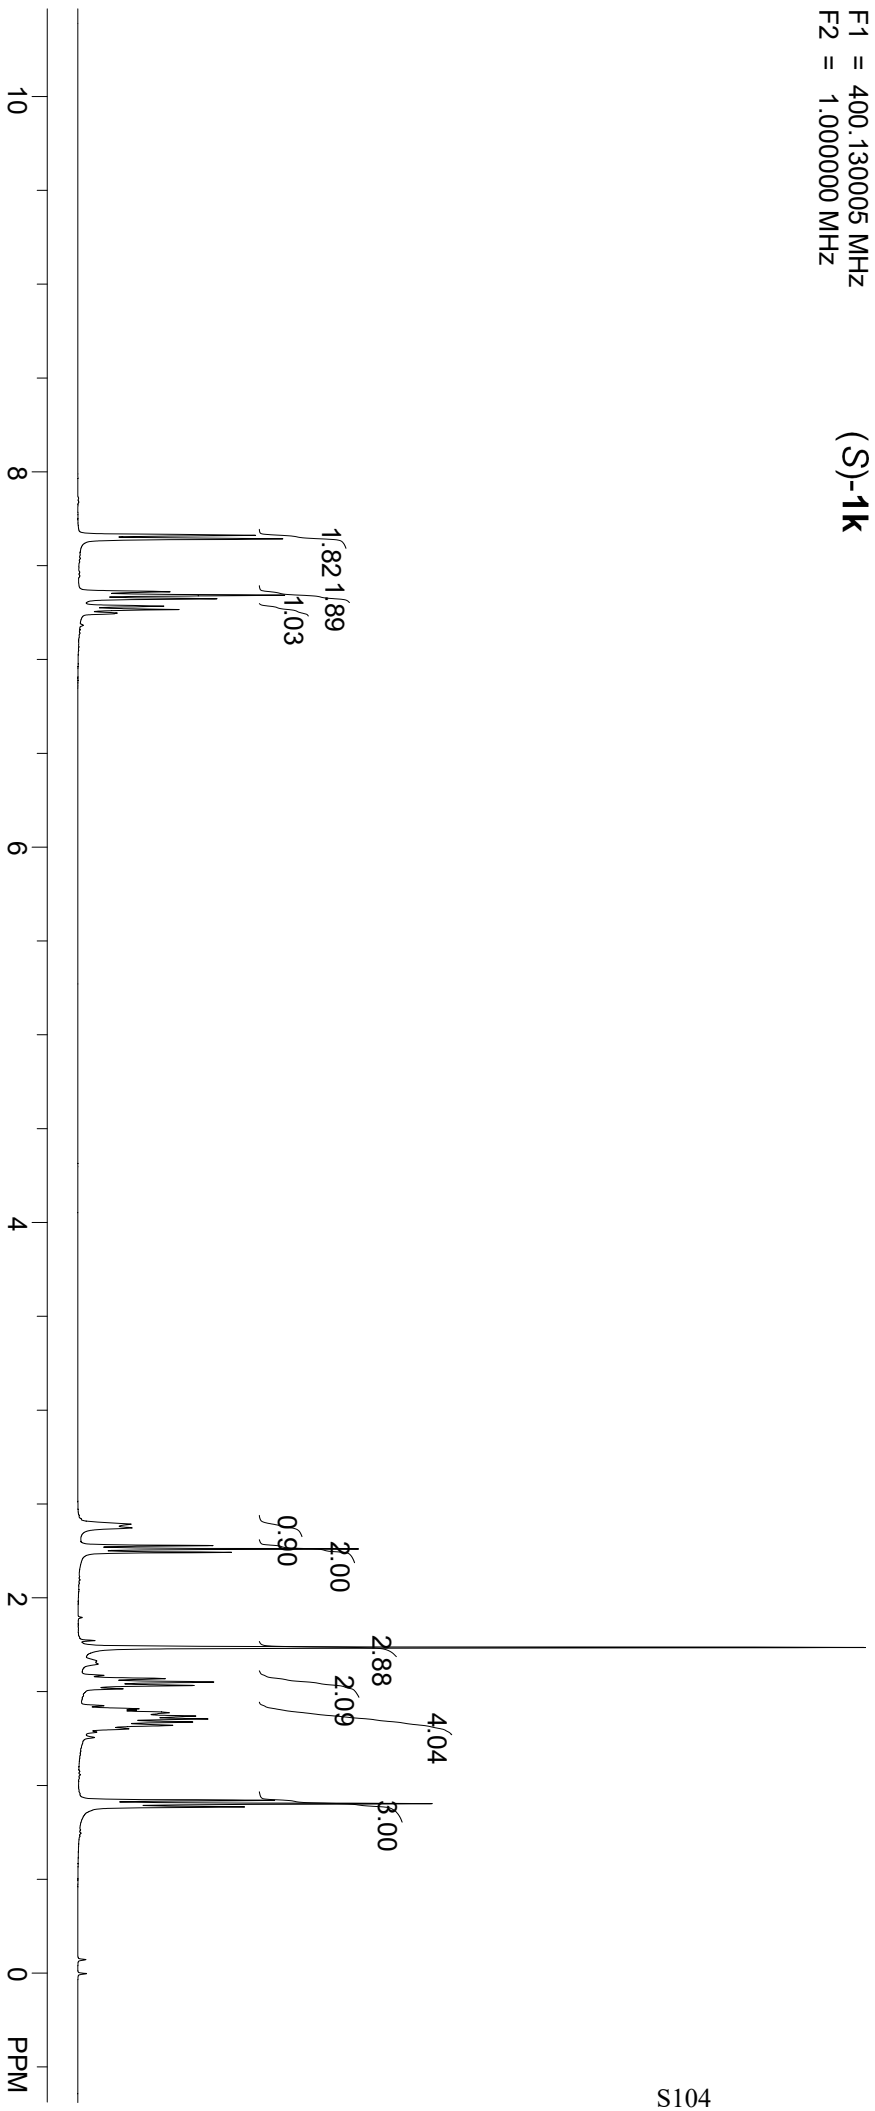



wj-1-051-1-C  
Sep 11 2019  
SOLVENT: CDCl3  
NA = 250  
F1 = 100.612770 MHz  
F2 = 1.000000 MHz

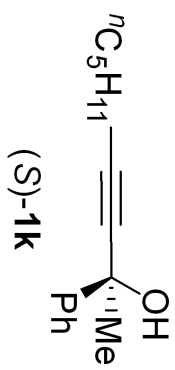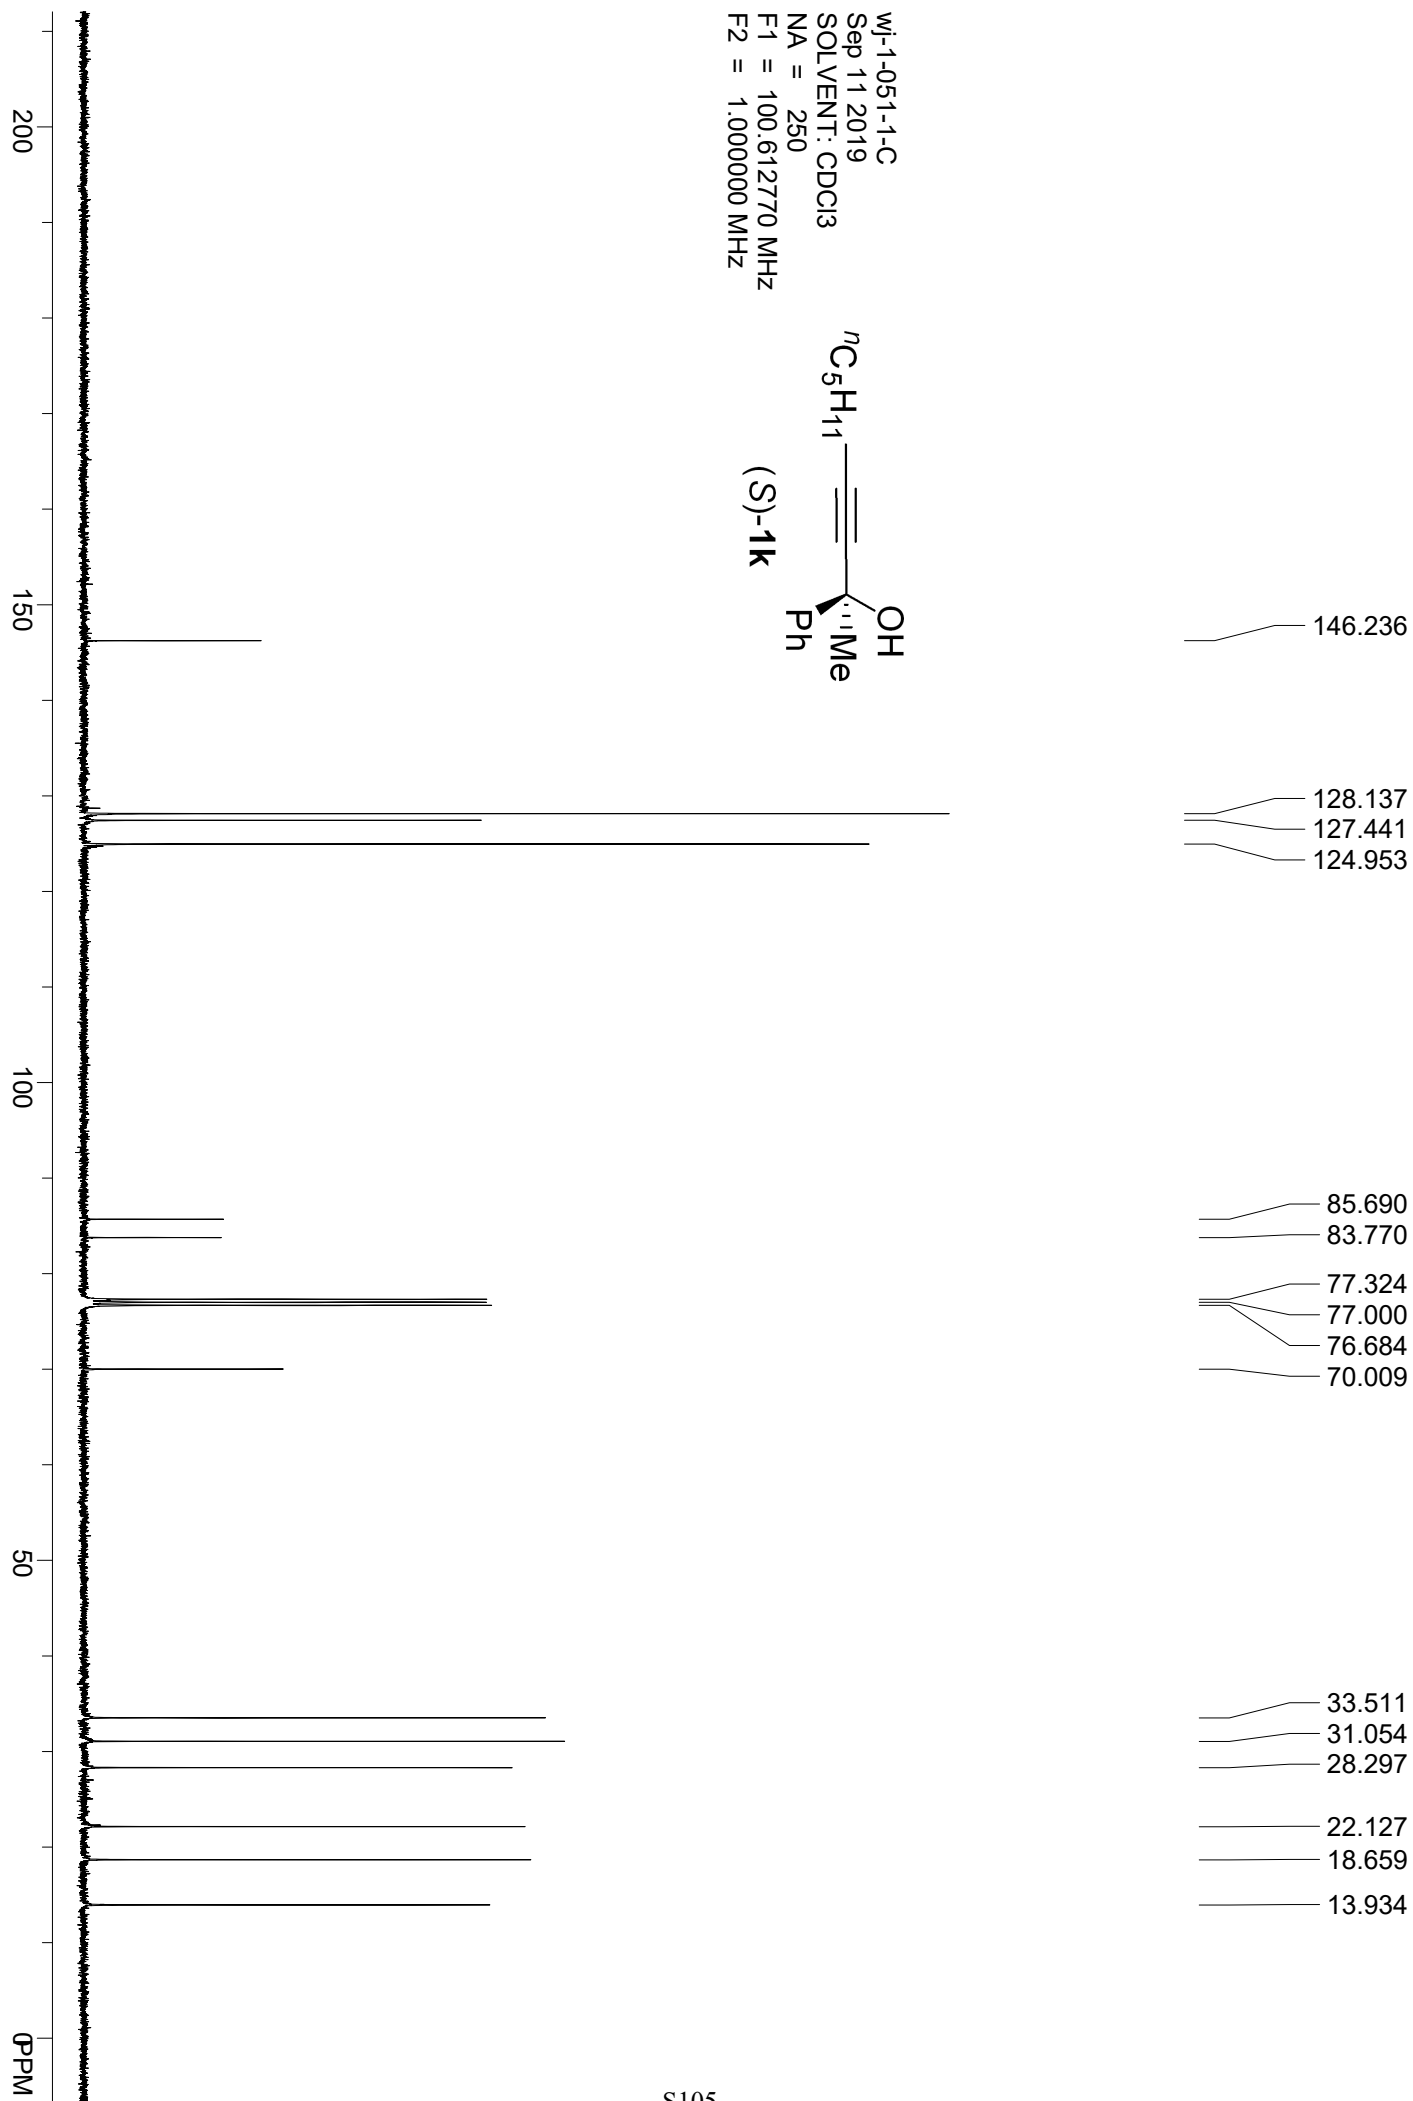

# Area Percent Report



Agilent Technologies

sample wj-1-051-1-AS-H-98-2-1.0-214

Data file: C:\Users\Public\Documents\ChemStation\1\Data\WJ\_LC 2019-09-12 22-38-10\003-P2-C1-wj-1-051-1.D

## Acquisition Data:

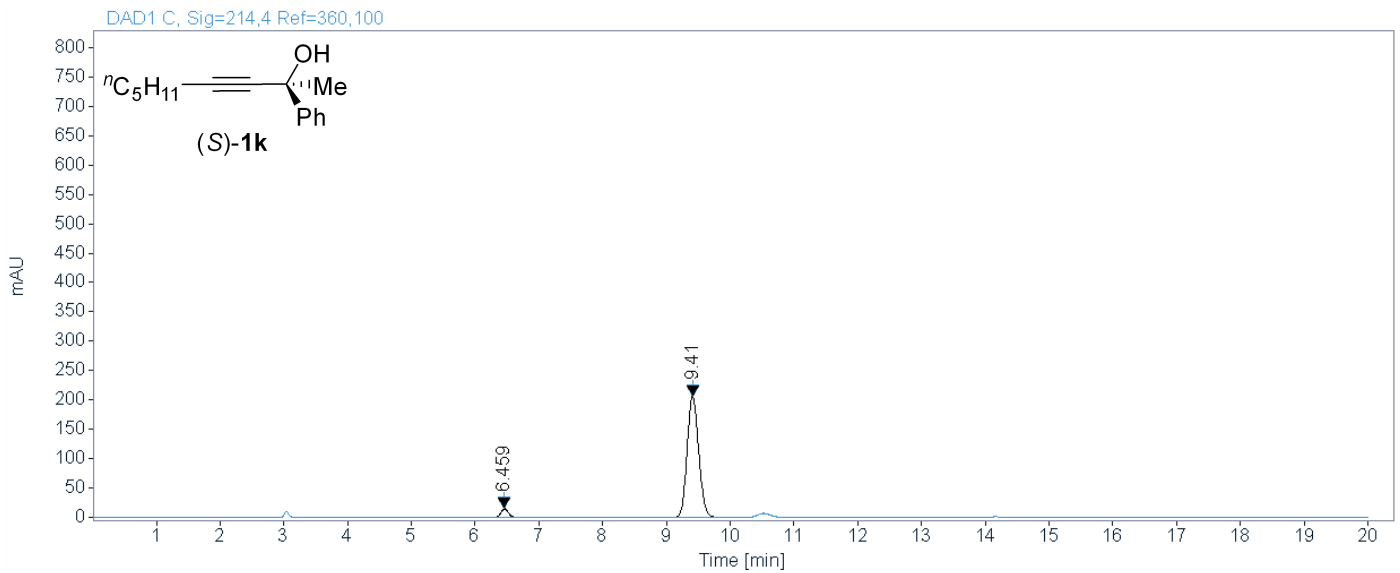

Signal: DAD1 C, Sig=214,4 Ref=360,100

| RT [min] | Width [min] | Height   | Area      | Area%    |
|----------|-------------|----------|-----------|----------|
| 6.459    | 0.1237      | 14.7959  | 118.8316  | 4.3368   |
| 9.410    | 0.1953      | 207.6289 | 2621.2363 | 95.6632  |
| Sum      |             |          | 2740.0679 | 100.0000 |

# Area Percent Report



sample wj-1-051-1-rac-AS-H-98-2-1.0-214

Data file: C:\Users\Public\Documents\ChemStation\1\Data\WJ\_LC 2019-09-12 22-38-10\004-P2-C2-wj-1-051-1-rac.D

## Acquisition Data:

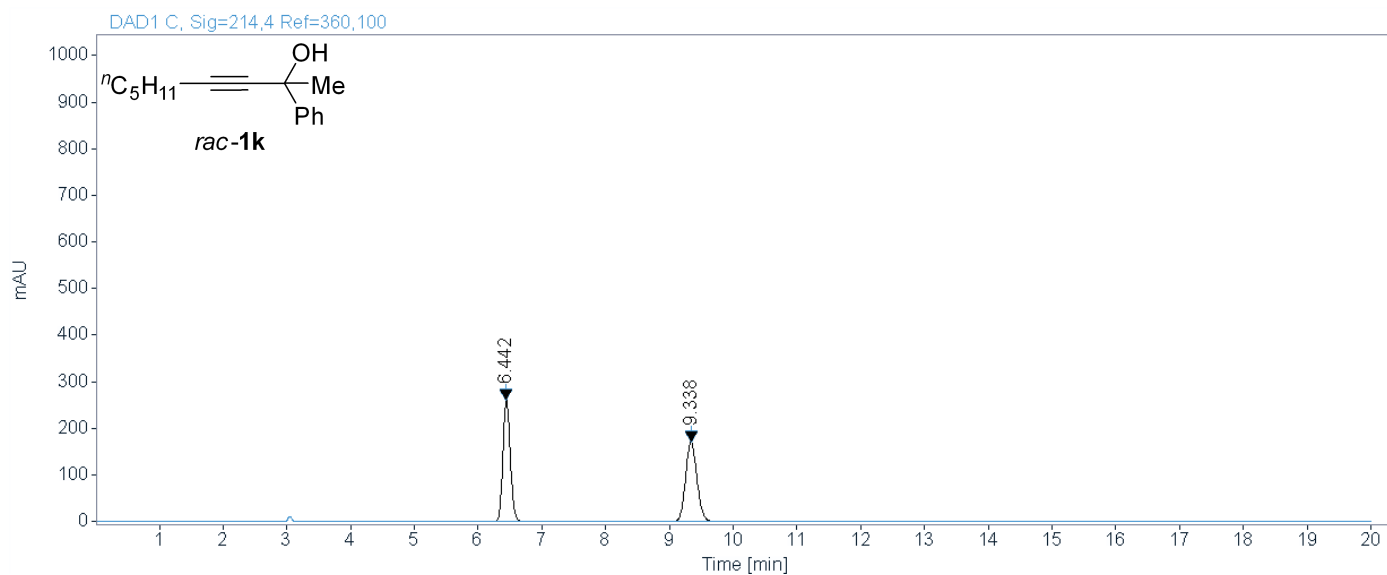

Signal: DAD1 C, Sig=214,4 Ref=360,100

| RT [min] | Width [min] | Height   | Area      | Area%    |
|----------|-------------|----------|-----------|----------|
| 6.442    | 0.1259      | 261.4917 | 2104.3892 | 49.7532  |
| 9.338    | 0.1935      | 170.4534 | 2125.2681 | 50.2468  |
| Sum      |             |          | 4229.6572 | 100.0000 |

7.661  
7.642  
7.358  
7.340  
7.321  
7.282  
7.264  
7.246

2.389  
2.376  
2.281  
2.263  
2.245  
1.736  
1.580  
1.563  
1.545  
1.526  
1.508  
1.444  
1.425  
1.408  
1.389  
1.373  
1.307  
1.298  
1.289  
1.260  
0.910  
0.894  
0.876  
-0.000

wj-1-054-1-H  
Sep 16 2019  
SOLVENT: CDCl3  
NA = 4  
F1 = 400.130035 MHz  
F2 = 1.000000 MHz

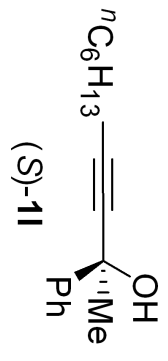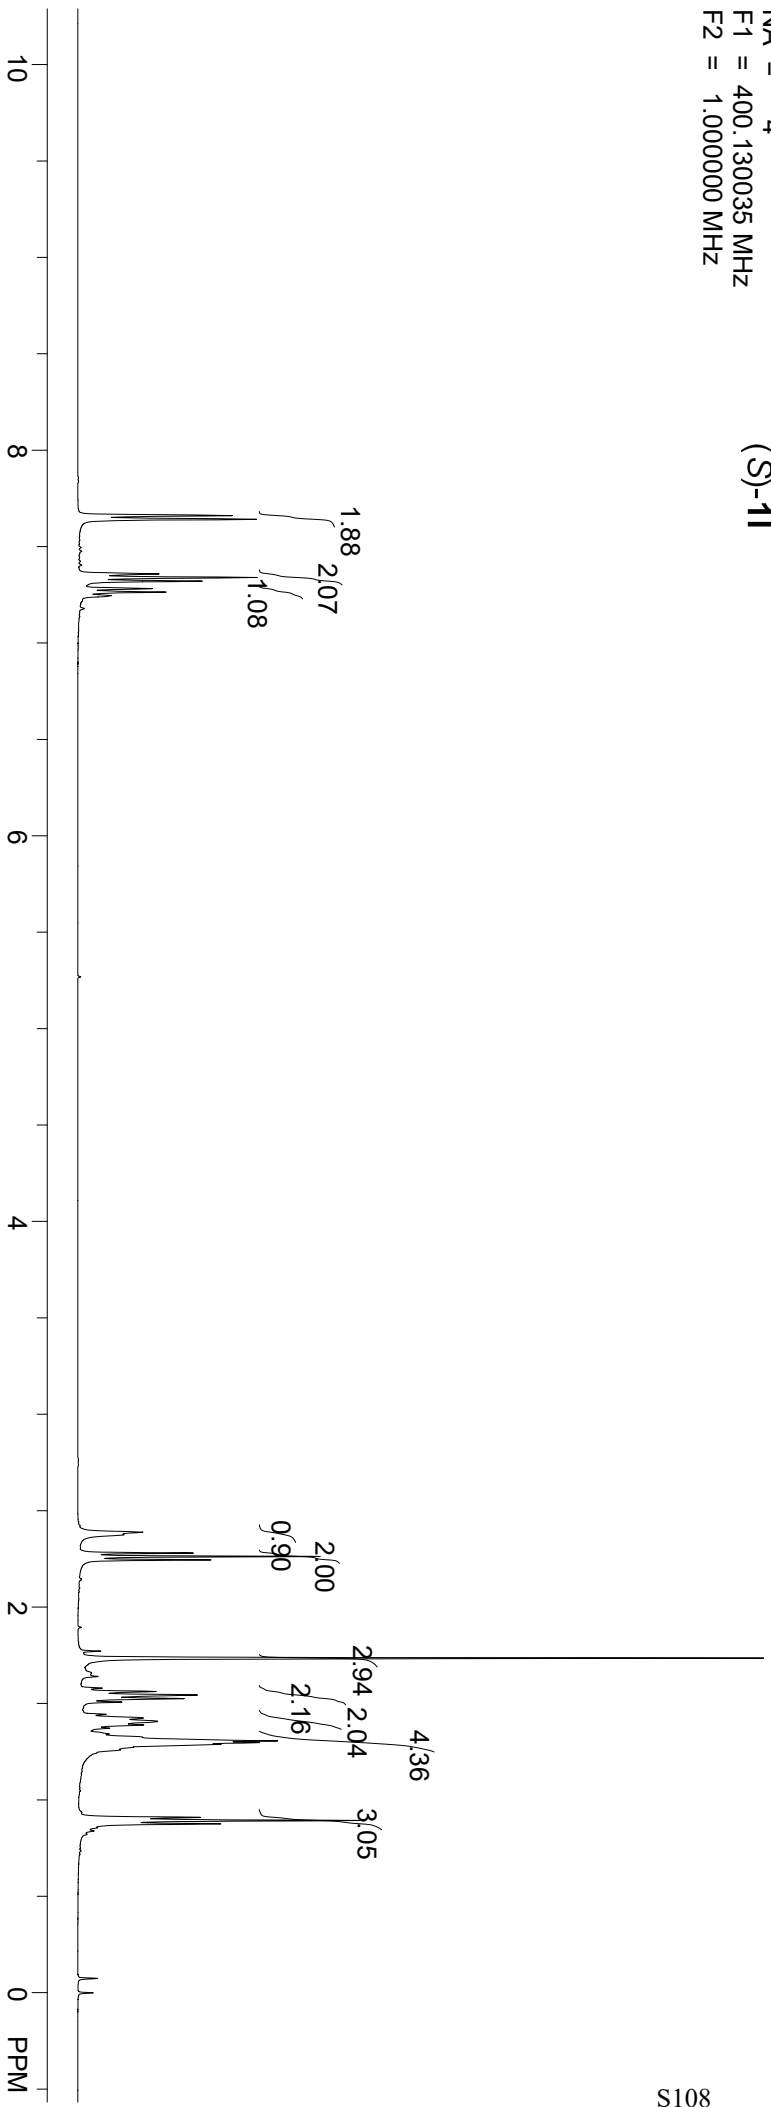

wj-1-054-1-C  
Sep 16 2019  
SOLVENT: CDCl3  
NA = 128  
F1 = 100.612770 MHz  
F2 = 1.000000 MHz

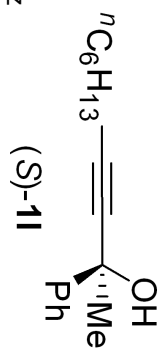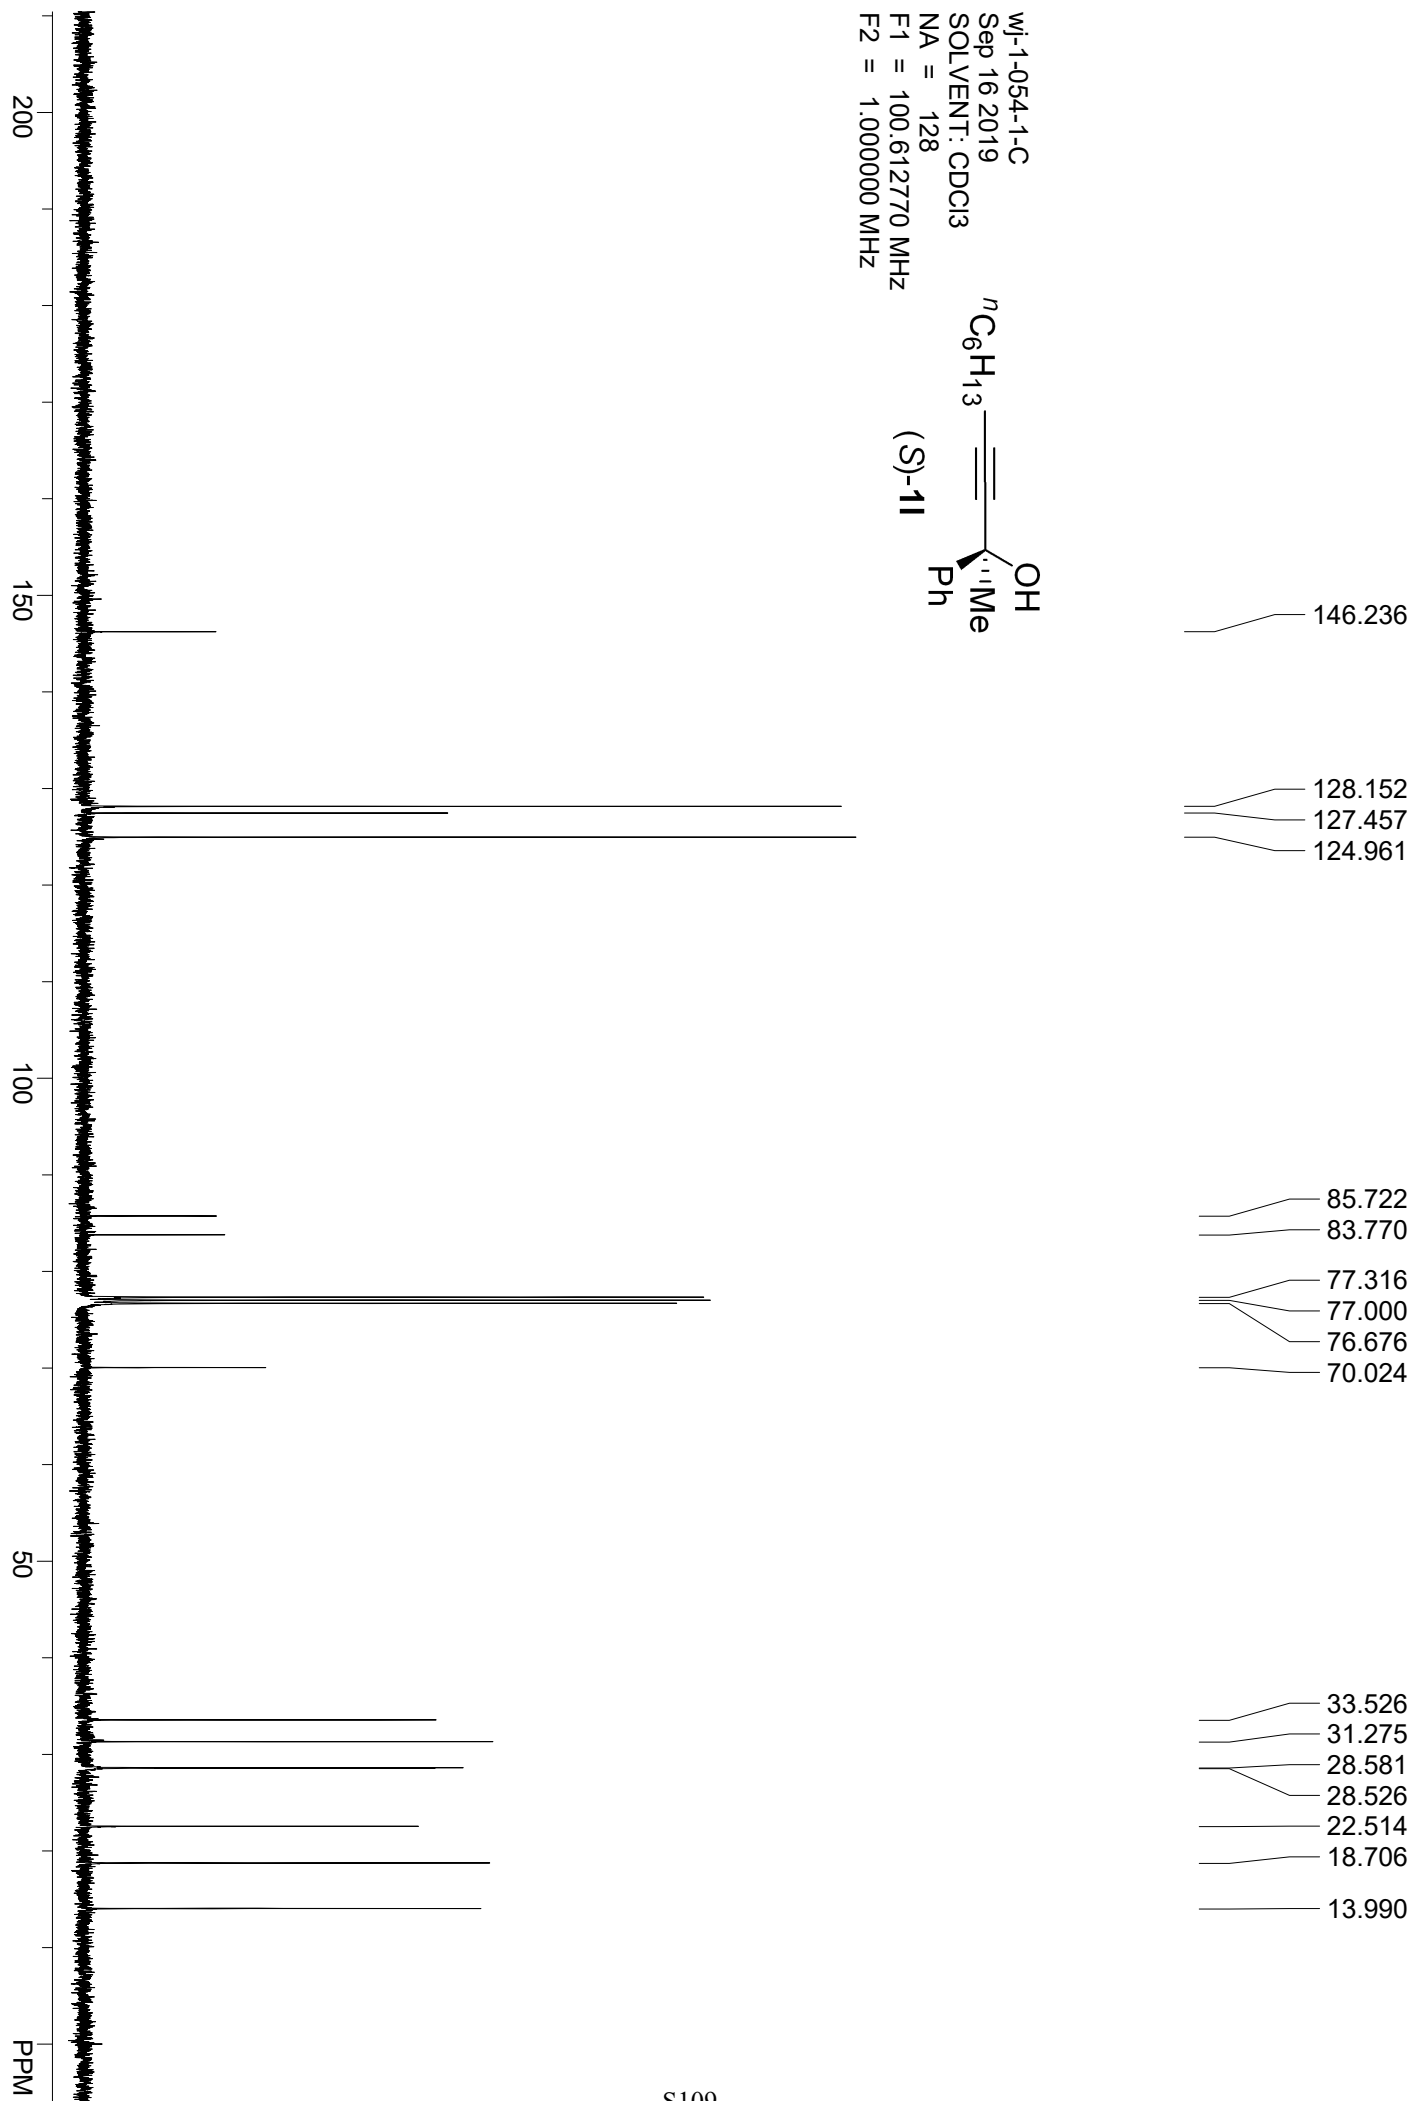

# Area Percent Report



sample wj-1-054-1-AS-H-98-2-1.0-214

Data file: C:\Users\Public\Documents\ChemStation\1\Data\WJ\_LC 2019-09-16 20-02-18\003-P2-C1-wj-1-054-1.D

## Acquisition Data:

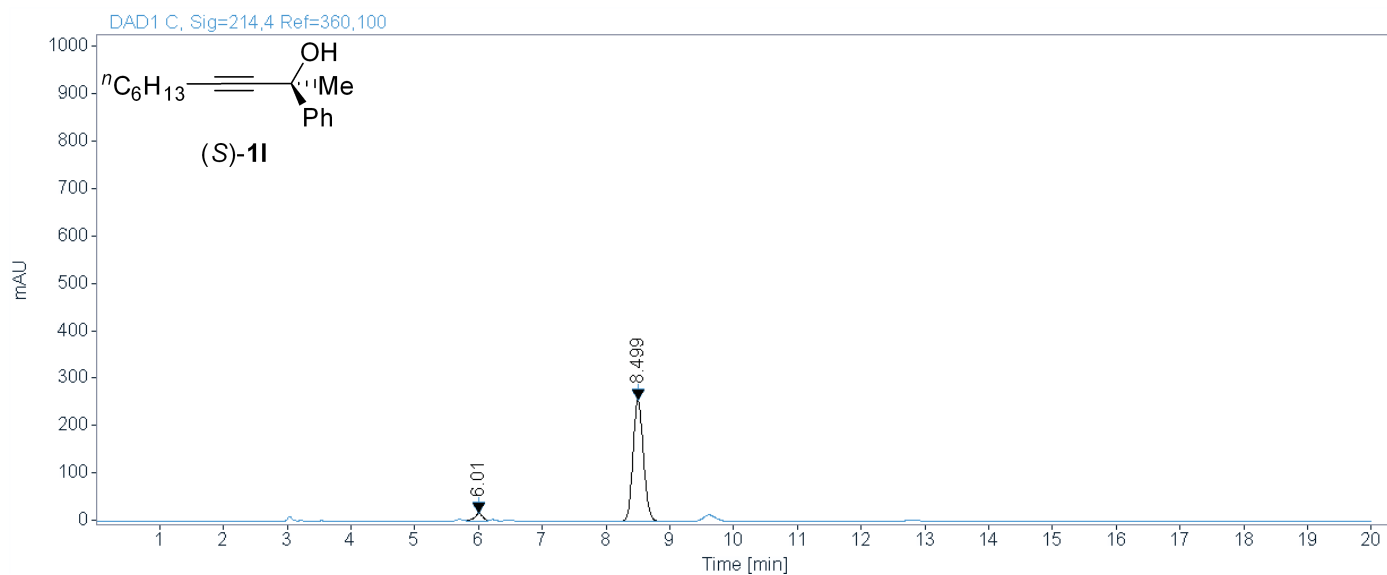

Signal: DAD1 C, Sig=214,4 Ref=360,100

| RT [min] | Width [min] | Height   | Area      | Area%    |
|----------|-------------|----------|-----------|----------|
| 6.010    | 0.1346      | 16.3880  | 149.7057  | 4.8551   |
| 8.499    | 0.1798      | 255.7857 | 2933.7458 | 95.1449  |
| Sum      |             |          | 3083.4516 | 100.0000 |

# Area Percent Report



Agilent Technologies

sample wj-1-054-1-rac-AS-H-98-2-1.0-214

Data file: C:\Users\Public\Documents\ChemStation\1\Data\WJ\_LC 2019-09-16 20-02-18\004-P2-C2-wj-1-054-1-rac.D

## Acquisition Data:

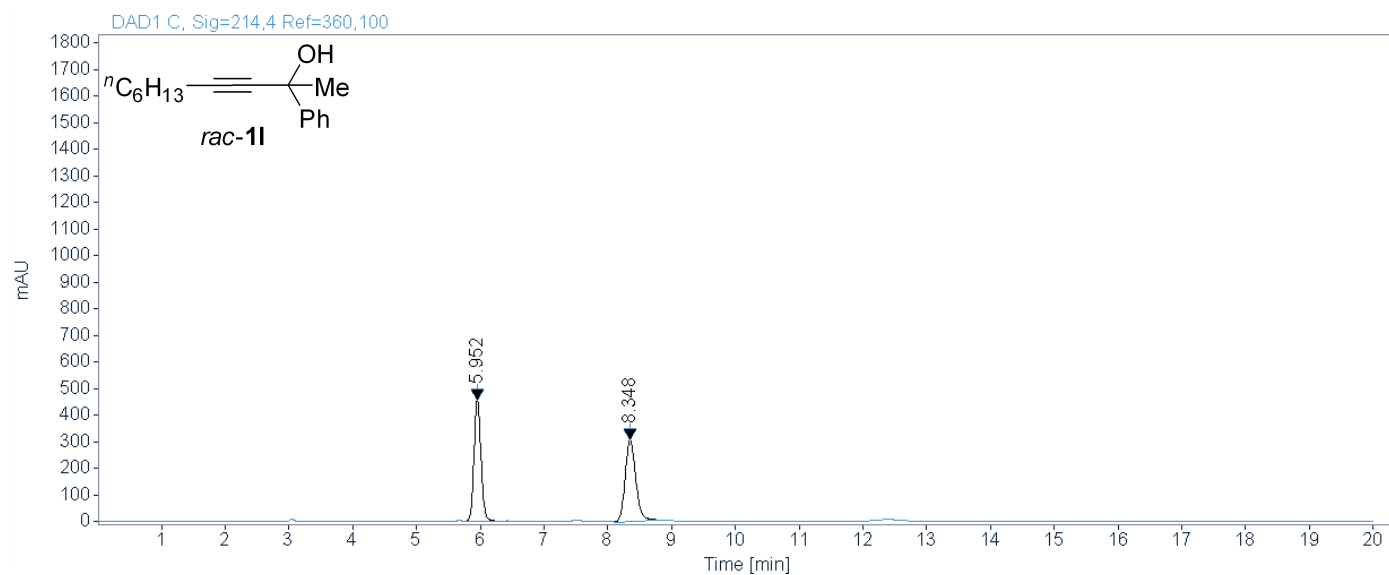

Signal: DAD1 C, Sig=214,4 Ref=360,100

| RT [min] | Width [min] | Height   | Area      | Area%    |
|----------|-------------|----------|-----------|----------|
| 5.952    | 0.1286      | 459.4753 | 3544.4277 | 49.8856  |
| 8.348    | 0.1940      | 305.9164 | 3560.6772 | 50.1144  |
| Sum      |             |          | 7105.1050 | 100.0000 |

wj-1-072-1-H  
Oct 05 2019  
SOLVENT: CDCl3  
NA = 4  
F1 = 400.130035 MHz  
F2 = 1.000000 MHz

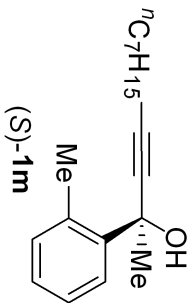

- 7.708
- 7.704
- 7.695
- 7.686
- 7.677
- 7.238
- 7.187
- 7.174
- 7.164
- 7.155
- 7.140

- 2.305
- 2.243
- 2.225
- 2.207
- 2.618
- 1.804
- 1.612
- 1.551
- 1.534
- 1.516
- 1.497
- 1.479
- 1.403
- 1.384
- 1.371
- 1.351
- 1.334
- 1.317
- 1.299
- 1.271
- 1.266
- 0.896
- 0.880
- 0.862
- 0.073
- 0.000

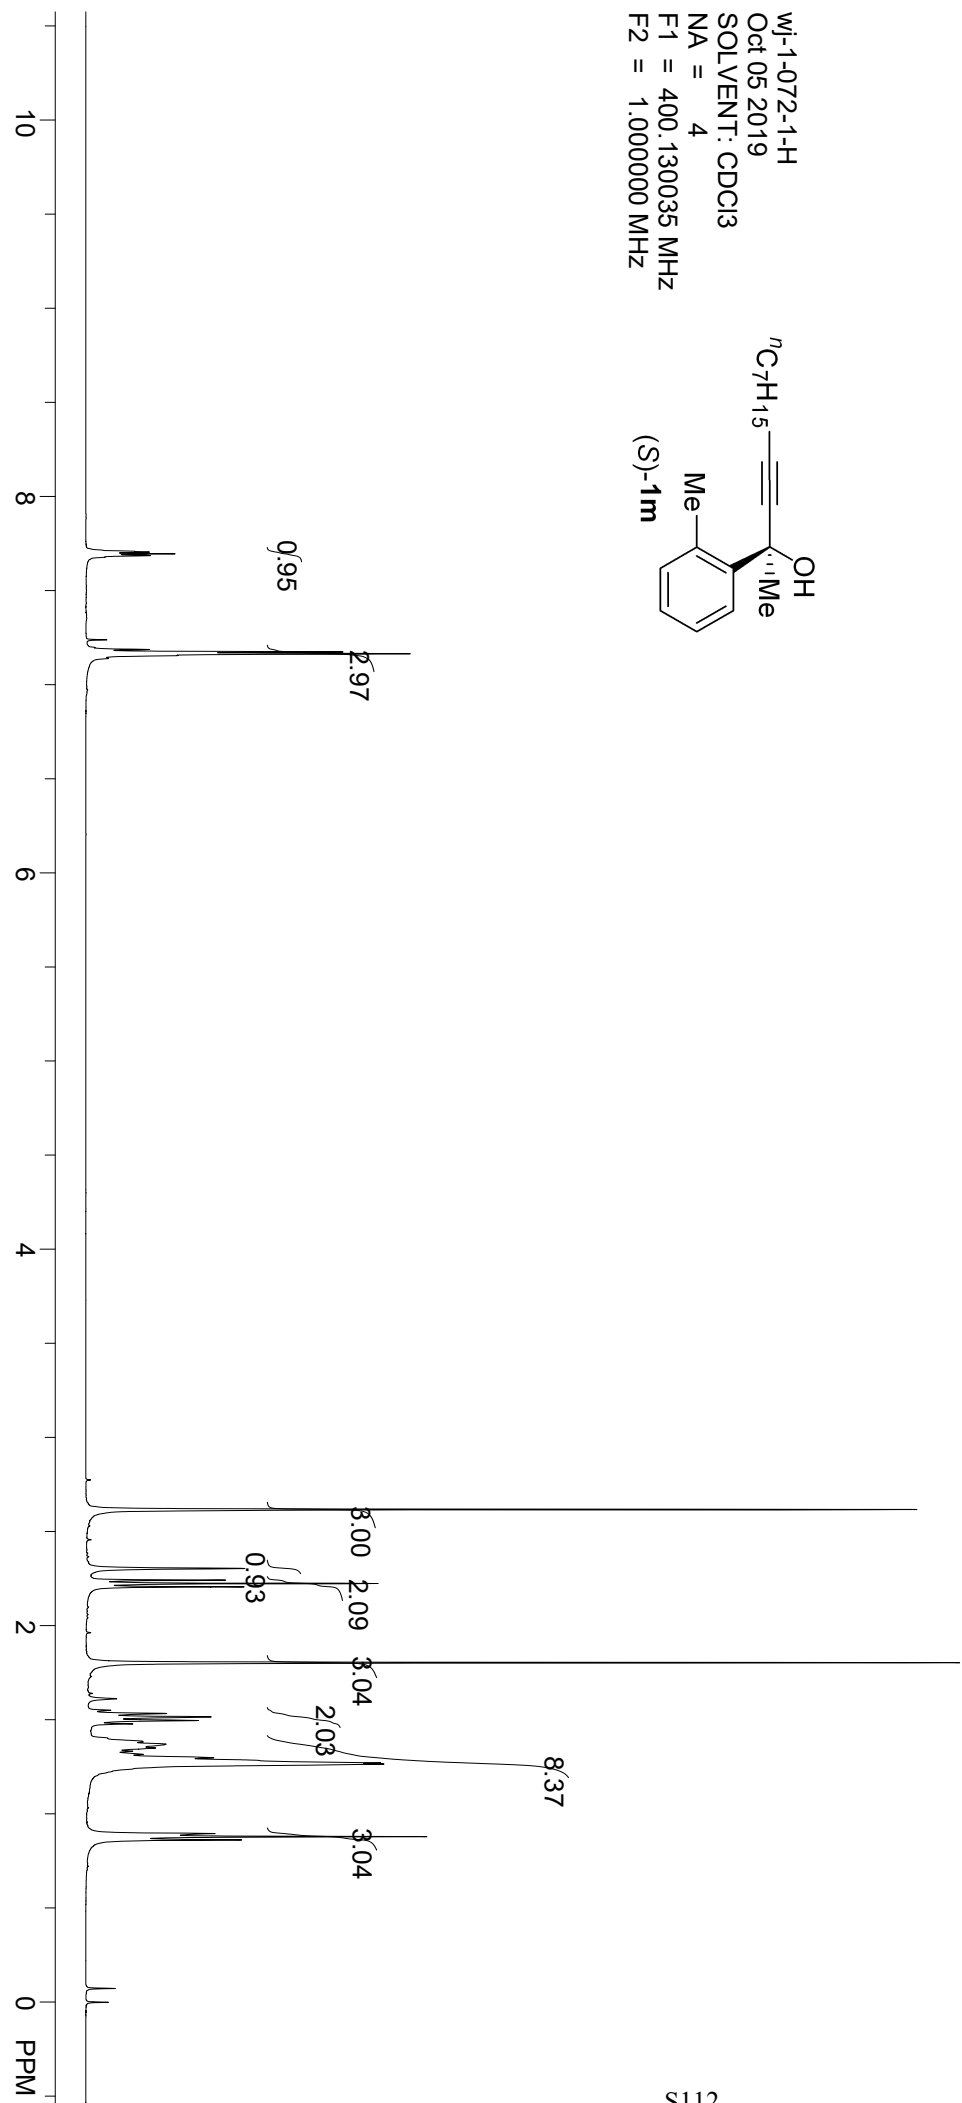



wj-1-072-1-C  
Oct 05 2019  
SOLVENT: CDCl3  
NA = 256  
F1 = 100.612770 MHz  
F2 = 1.000000 MHz

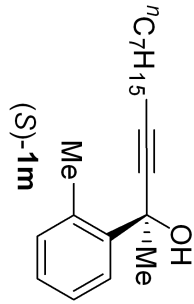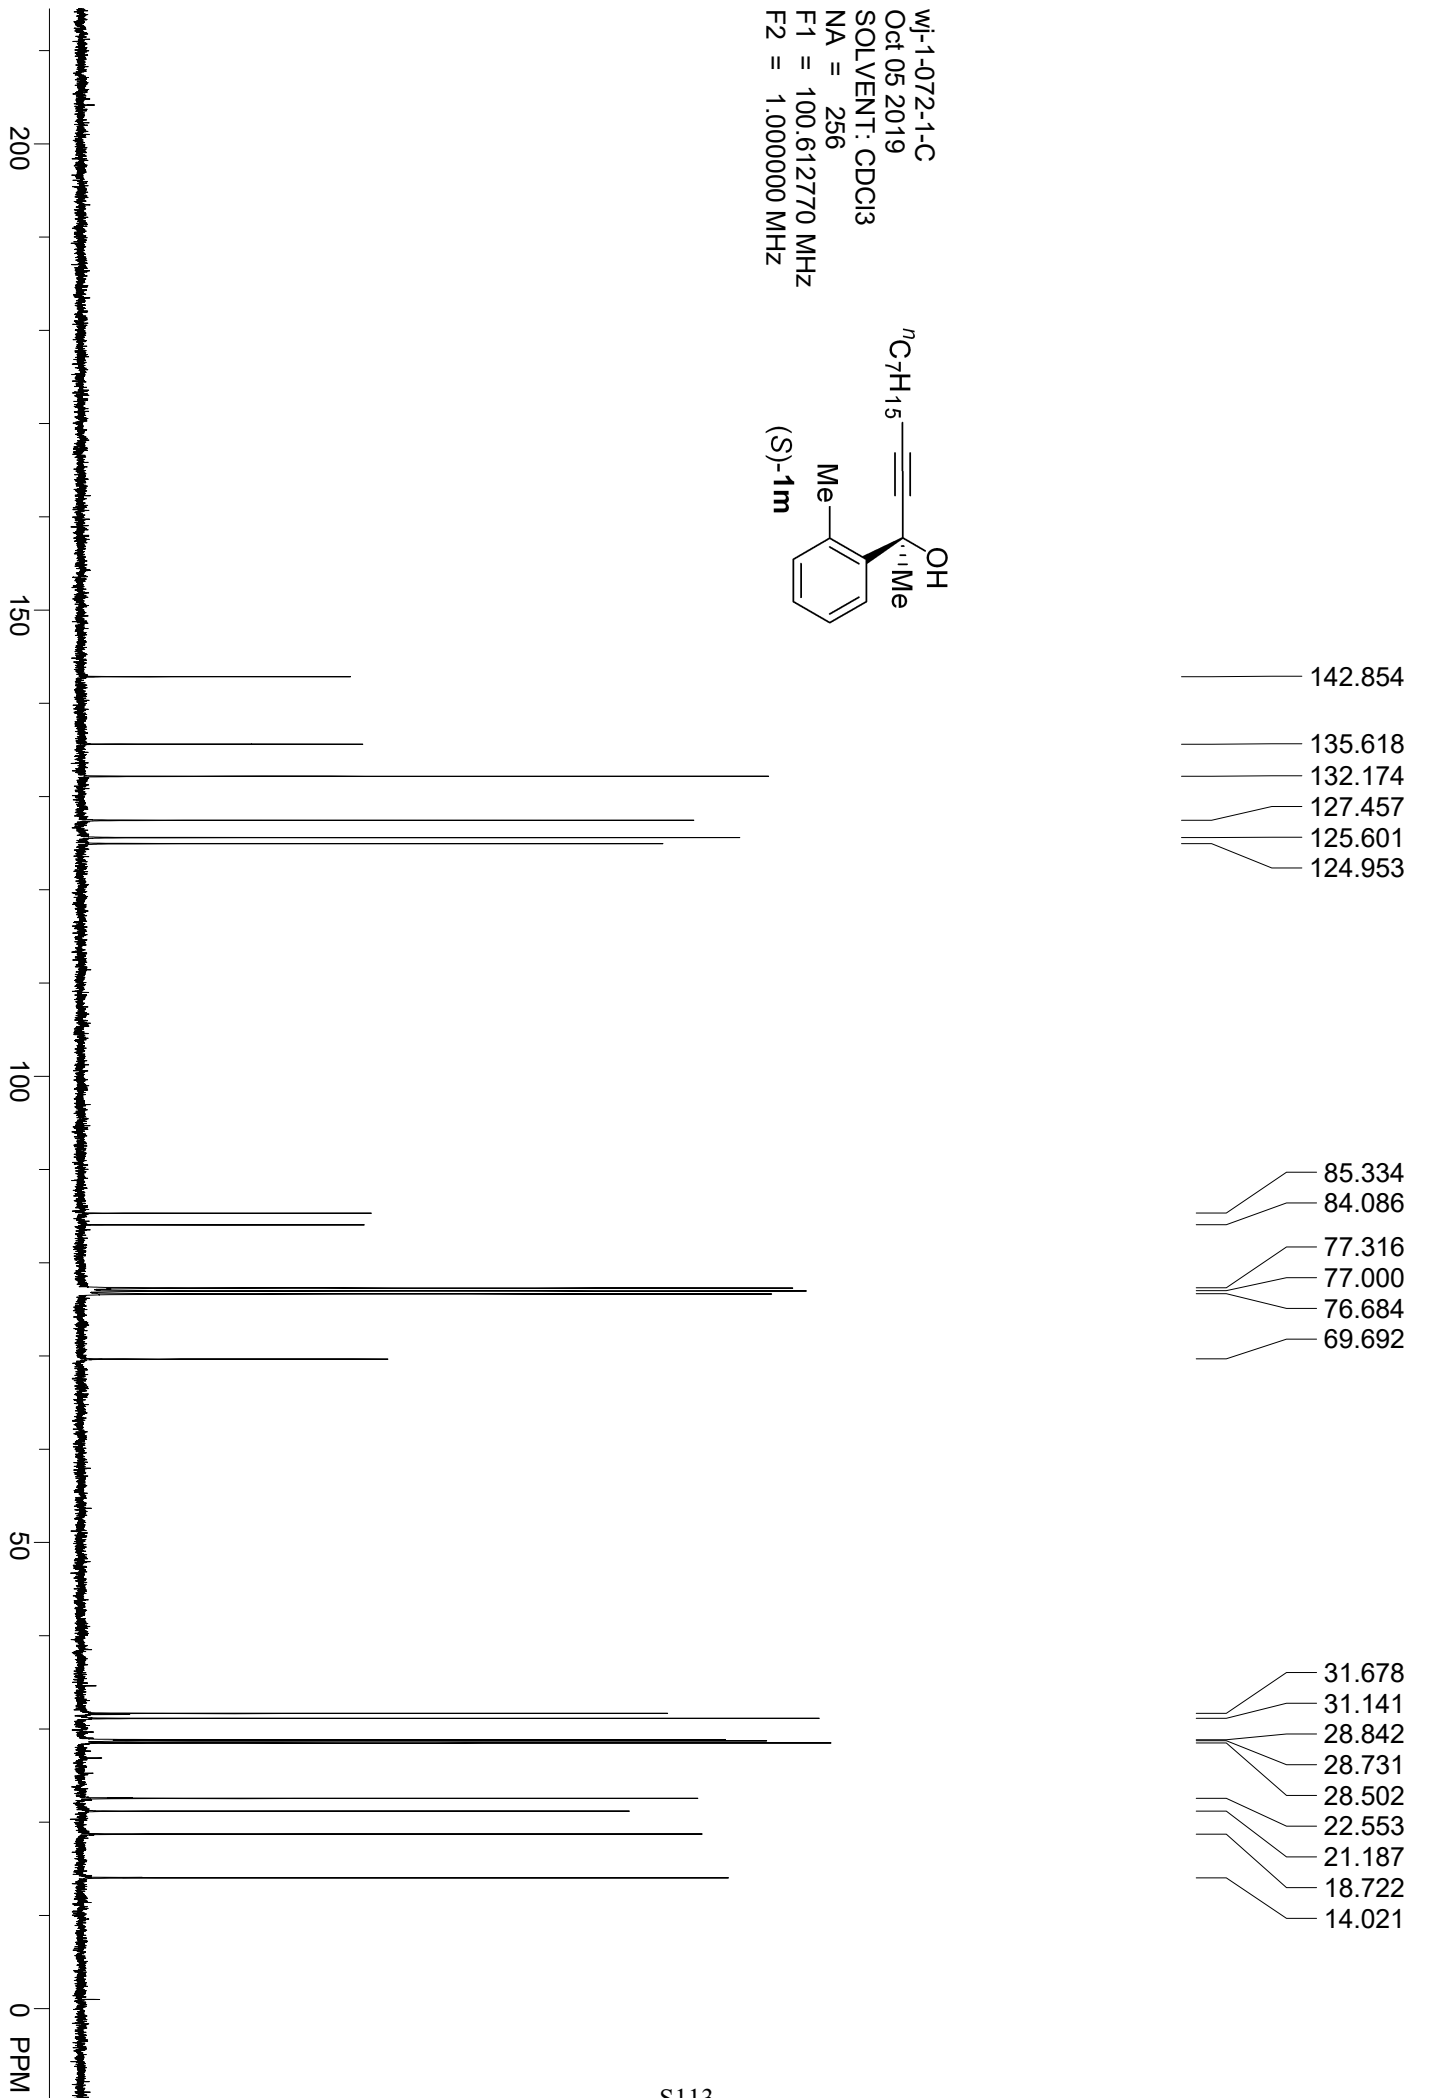

# Area Percent Report



Agilent Technologies

sample wj-1-072-1-AS-H-98-2-1.0-214

Data file: C:\Users\Public\Documents\ChemStation\1\Data\zwf-allenioc acid\_LC 2019-10-05 11-37-07\036-P2-C1-wj-1-072-1.D

## Acquisition Data:

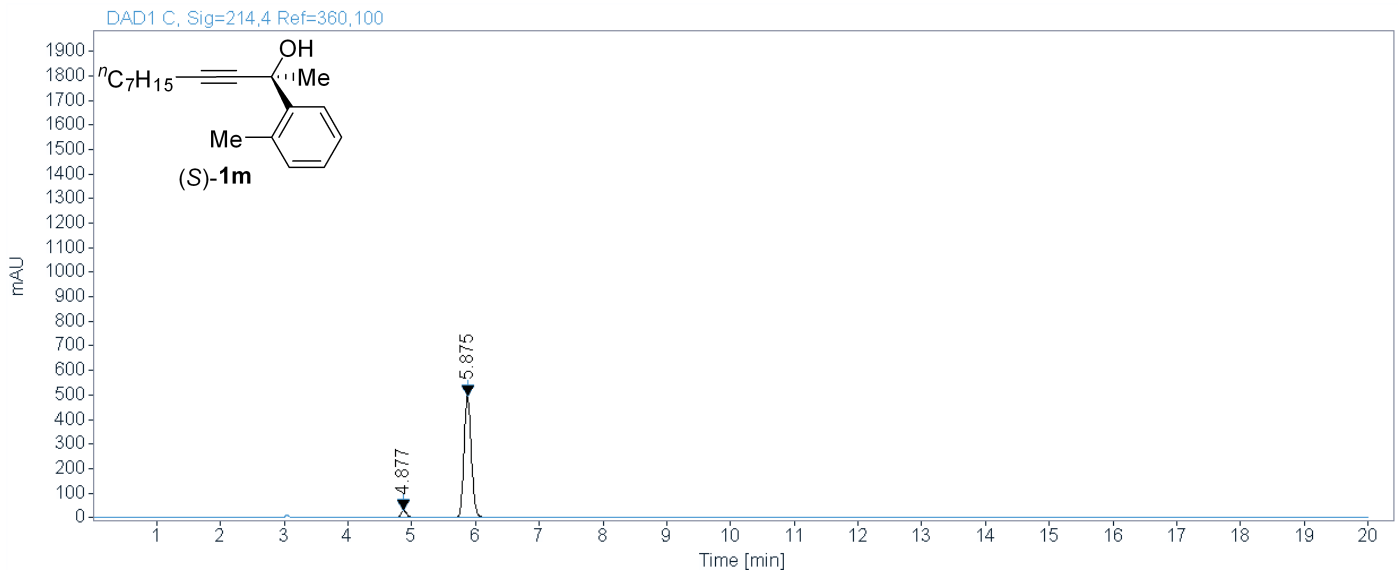

Signal: DAD1 C, Sig=214,4 Ref=360,100

| RT [min] | Width [min] | Height   | Area      | Area%    |
|----------|-------------|----------|-----------|----------|
| 4.877    | 0.0977      | 28.5560  | 180.2966  | 4.3083   |
| 5.875    | 0.1241      | 496.5209 | 4004.5703 | 95.6917  |
| Sum      |             |          | 4184.8669 | 100.0000 |

# Area Percent Report



sample wj-1-072-1-rac-AS-H-98-2-1.0-214

Data file: C:\Users\Public\Documents\ChemStation\1\Data\zwf-allenioc acid\_LC 2019-10-05 11-37-07\037-P2-C2-wj-1-072-1-rac.D

## Acquisition Data:

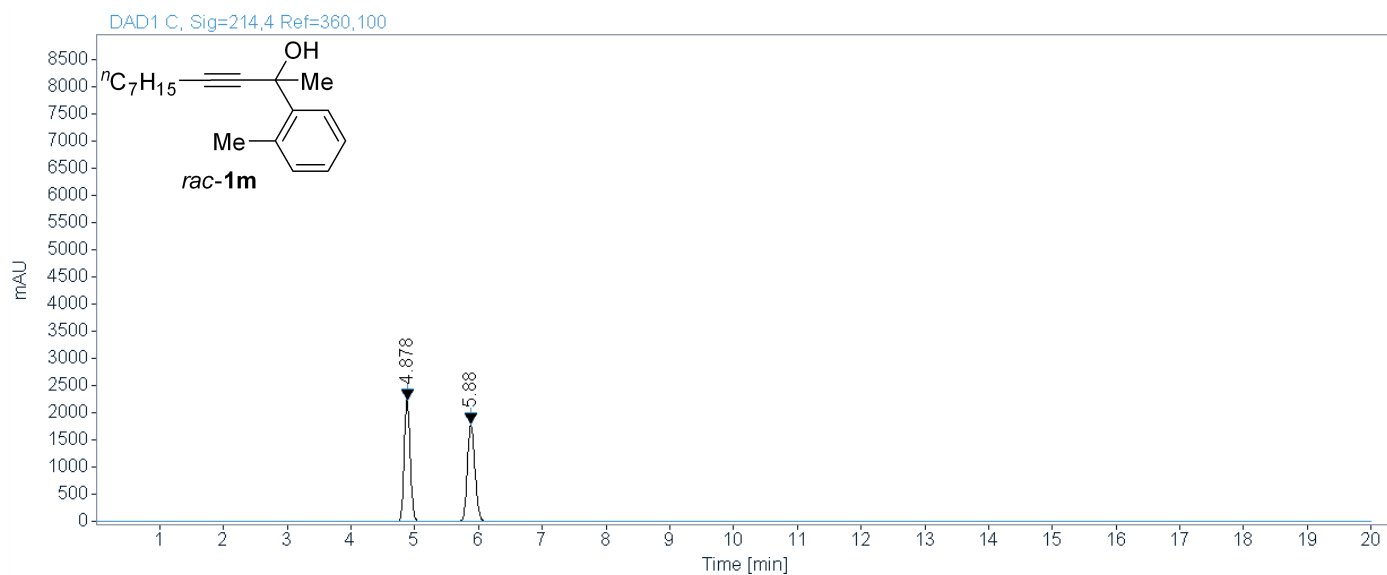

Signal: DAD1 C, Sig=214,4 Ref=360,100

| RT [min] | Width [min] | Height    | Area       | Area%    |
|----------|-------------|-----------|------------|----------|
| 4.878    | 0.1031      | 2244.5510 | 14895.3457 | 49.6865  |
| 5.880    | 0.1317      | 1795.0894 | 15083.3193 | 50.3135  |
| Sum      |             |           | 29978.6650 | 100.0000 |

wj-1-069-1-H  
Sep 28 2019  
SOLVENT: CDCl3  
NA = 4  
F1 = 400.130005 MHz  
F2 = 1.000000 MHz

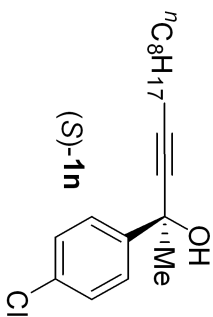

7.586  
7.566  
7.311  
7.291  
7.256

2.391  
2.272  
2.254  
2.237  
1.708  
1.571  
1.554  
1.536  
1.518  
1.500  
1.389  
1.278  
0.899  
0.884  
0.867  
-0.000

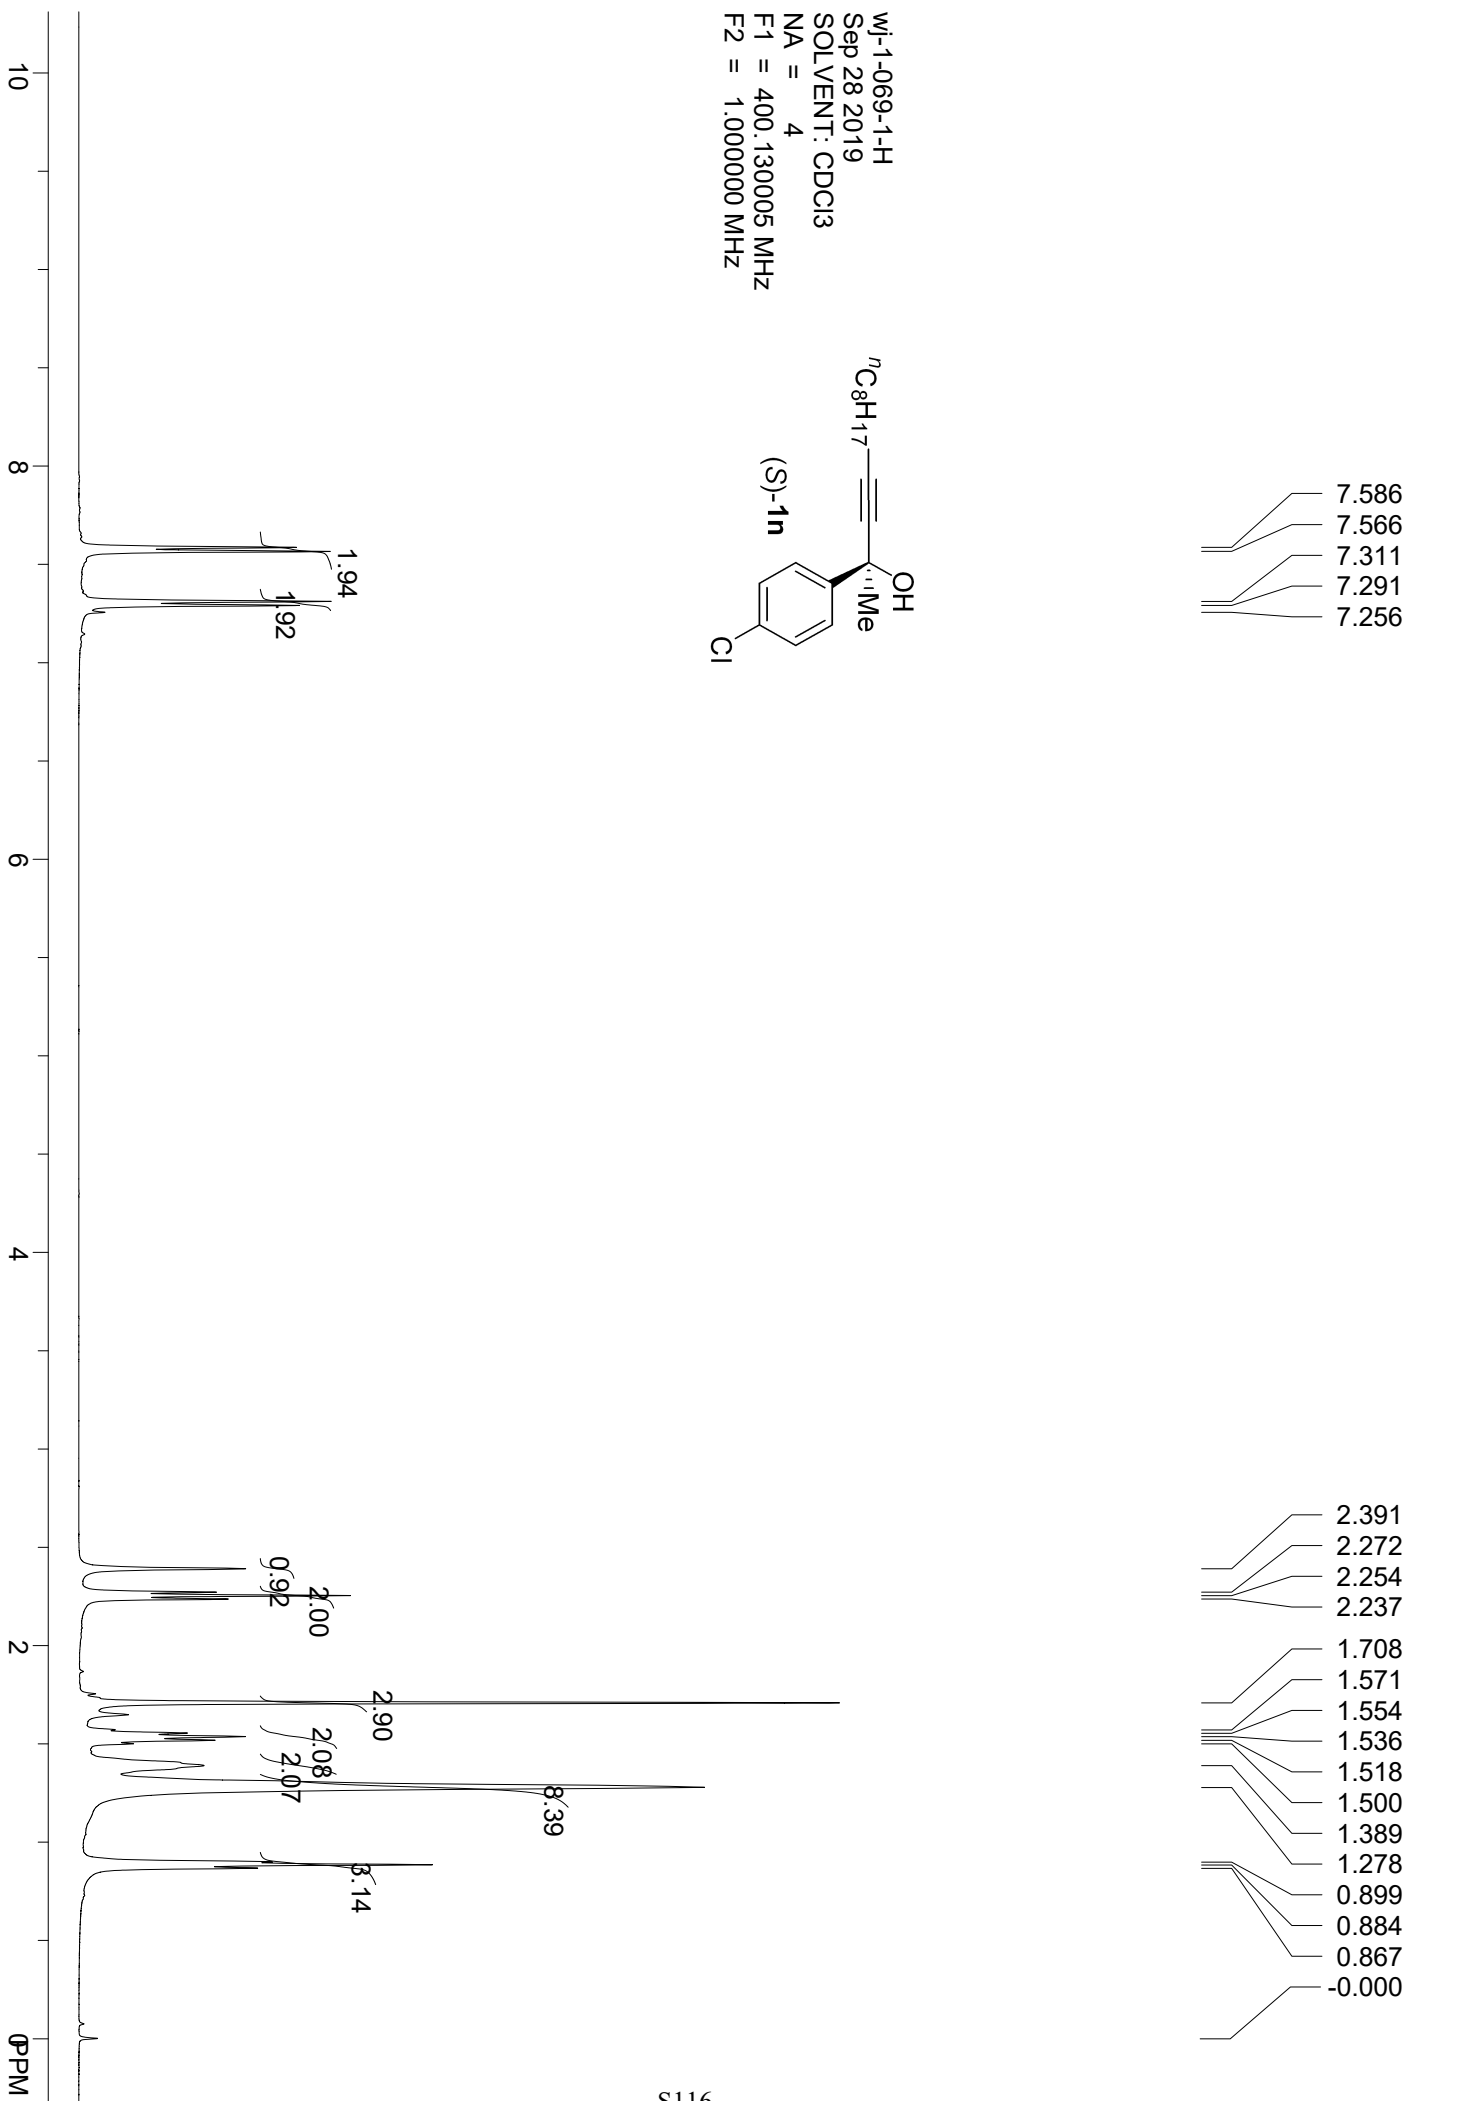

wj-1-069-1-C  
Sep 28 2019  
SOLVENT: CDCl3  
NA = 100  
F1 = 100.623833 MHz  
F2 = 1.000000 MHz

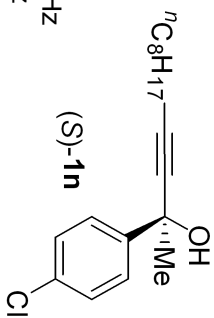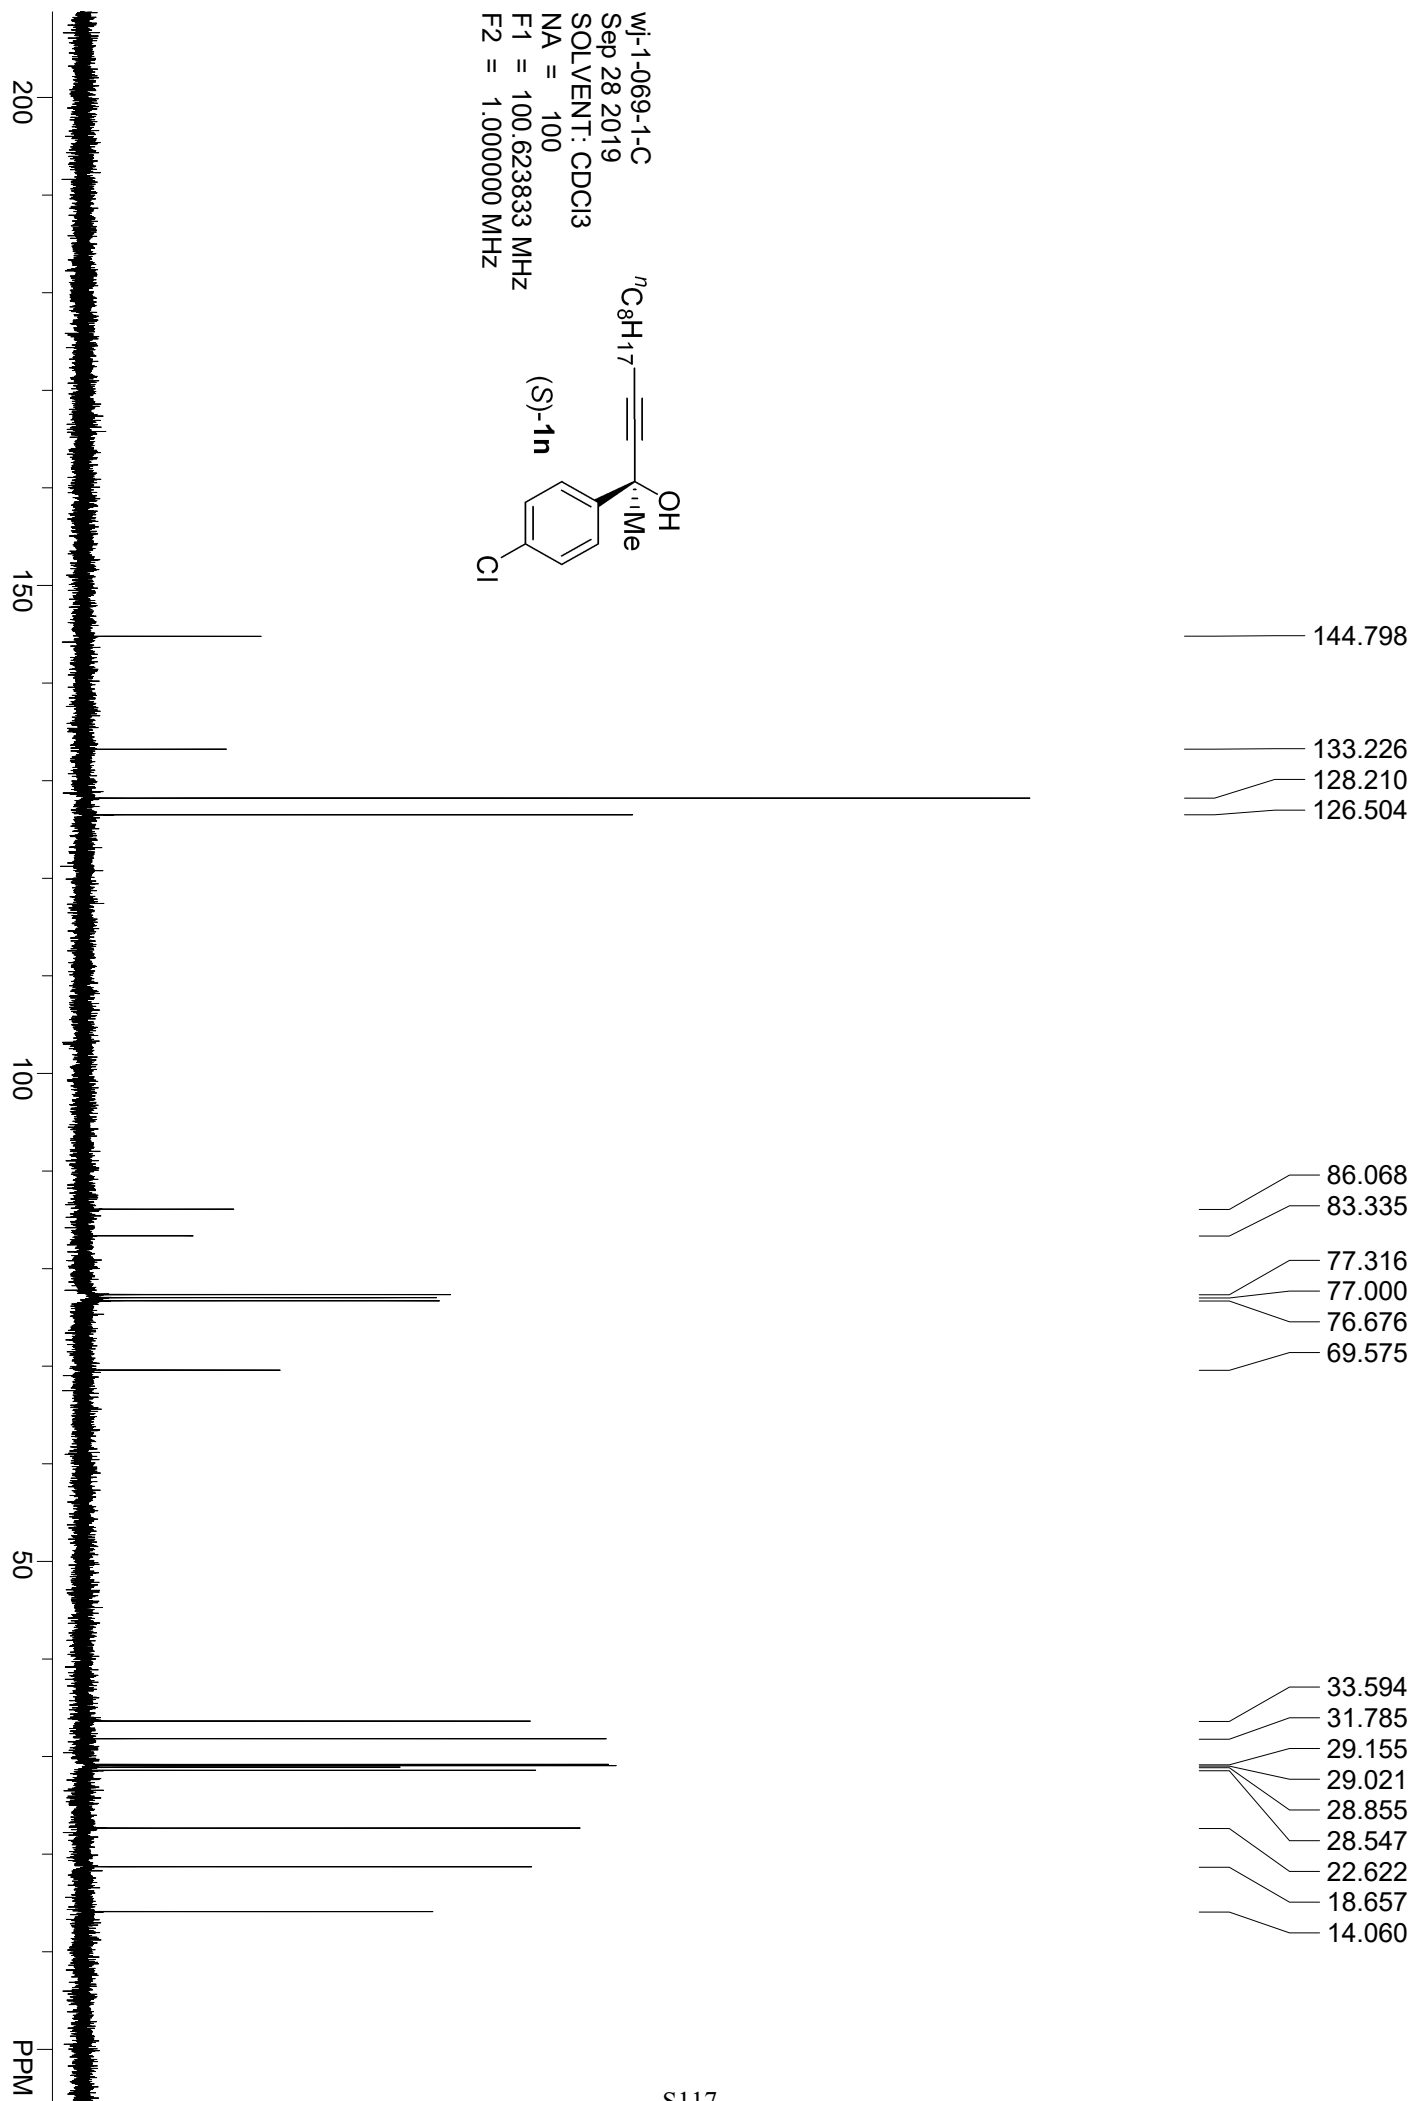

# Area Percent Report



sample wj-1-069-1-AS-H-98-2-1.0-214

Data file: C:\Users\Public\Documents\ChemStation\1\Data\WJ\_LC 2019-09-28 15-09-29\003-P2-C1-wj-1-069-1.D

## Acquisition Data:

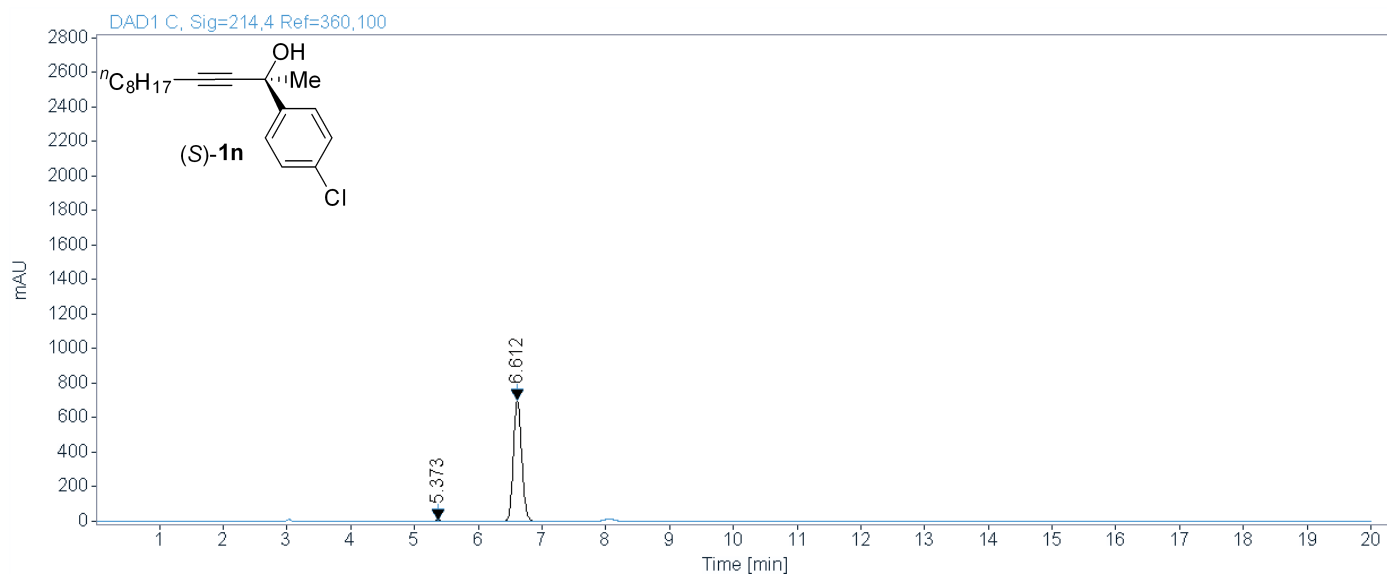

Signal: DAD1 C, Sig=214,4 Ref=360,100

| RT [min] | Width [min] | Height   | Area      | Area%    |
|----------|-------------|----------|-----------|----------|
| 5.373    | 0.1068      | 5.2197   | 36.1348   | 0.5599   |
| 6.612    | 0.1403      | 704.2572 | 6417.6631 | 99.4401  |
| Sum      |             |          | 6453.7979 | 100.0000 |

# Area Percent Report



sample wj-1-069-1-rac-AS-H-98-2-1.0-214

Data file: C:\Users\Public\Documents\ChemStation\1\Data\WJ\_LC 2019-09-28 15-09-29\004-P2-C2-wj-1-069-1-rac.D

## Acquisition Data:

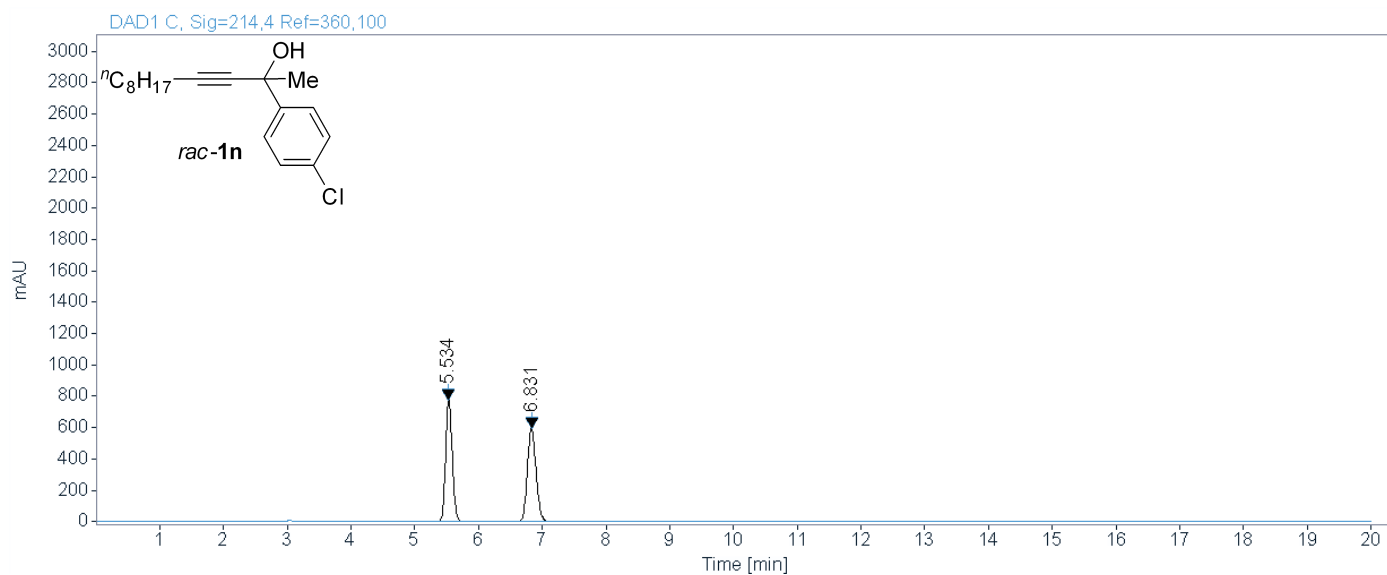

Signal: DAD1 C, Sig=214,4 Ref=360,100

| RT [min] | Width [min] | Height   | Area       | Area%    |
|----------|-------------|----------|------------|----------|
| 5.534    | 0.1128      | 777.6021 | 5654.7524  | 49.9115  |
| 6.831    | 0.1470      | 596.2778 | 5674.8145  | 50.0885  |
| Sum      |             |          | 11329.5669 | 100.0000 |

wj-1-120-1-H  
Dec 03 2019  
SOLVENT: CDCl3  
NA = 4  
F1 = 400.130005 MHz  
F2 = 1.000000 MHz

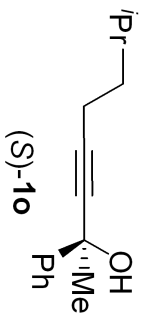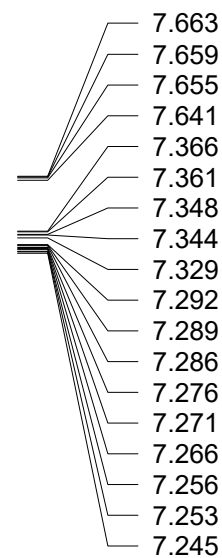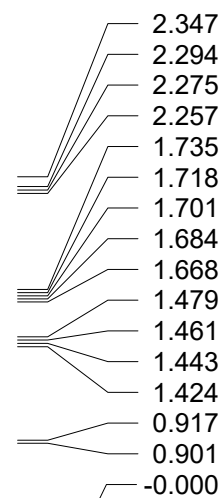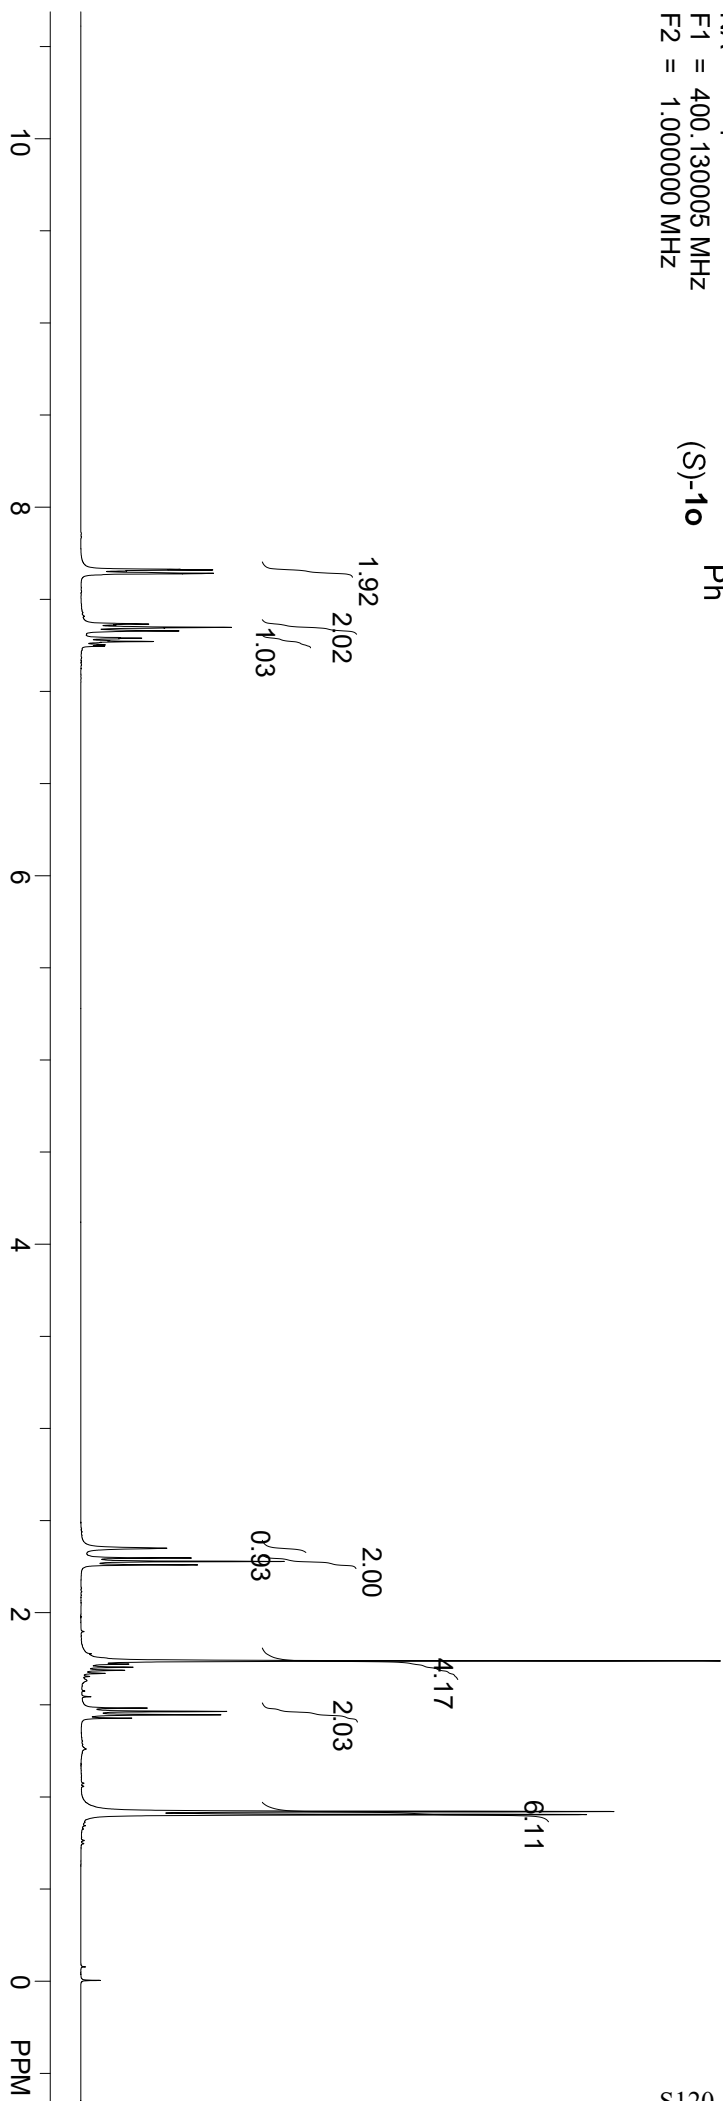



wj-1-120-1-C  
Dec 03 2019  
SOLVENT: CDCl3  
NA = 200  
F1 = 100.612770 MHz  
F2 = 1.000000 MHz

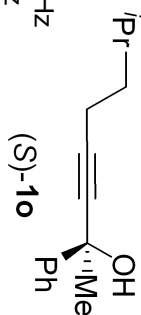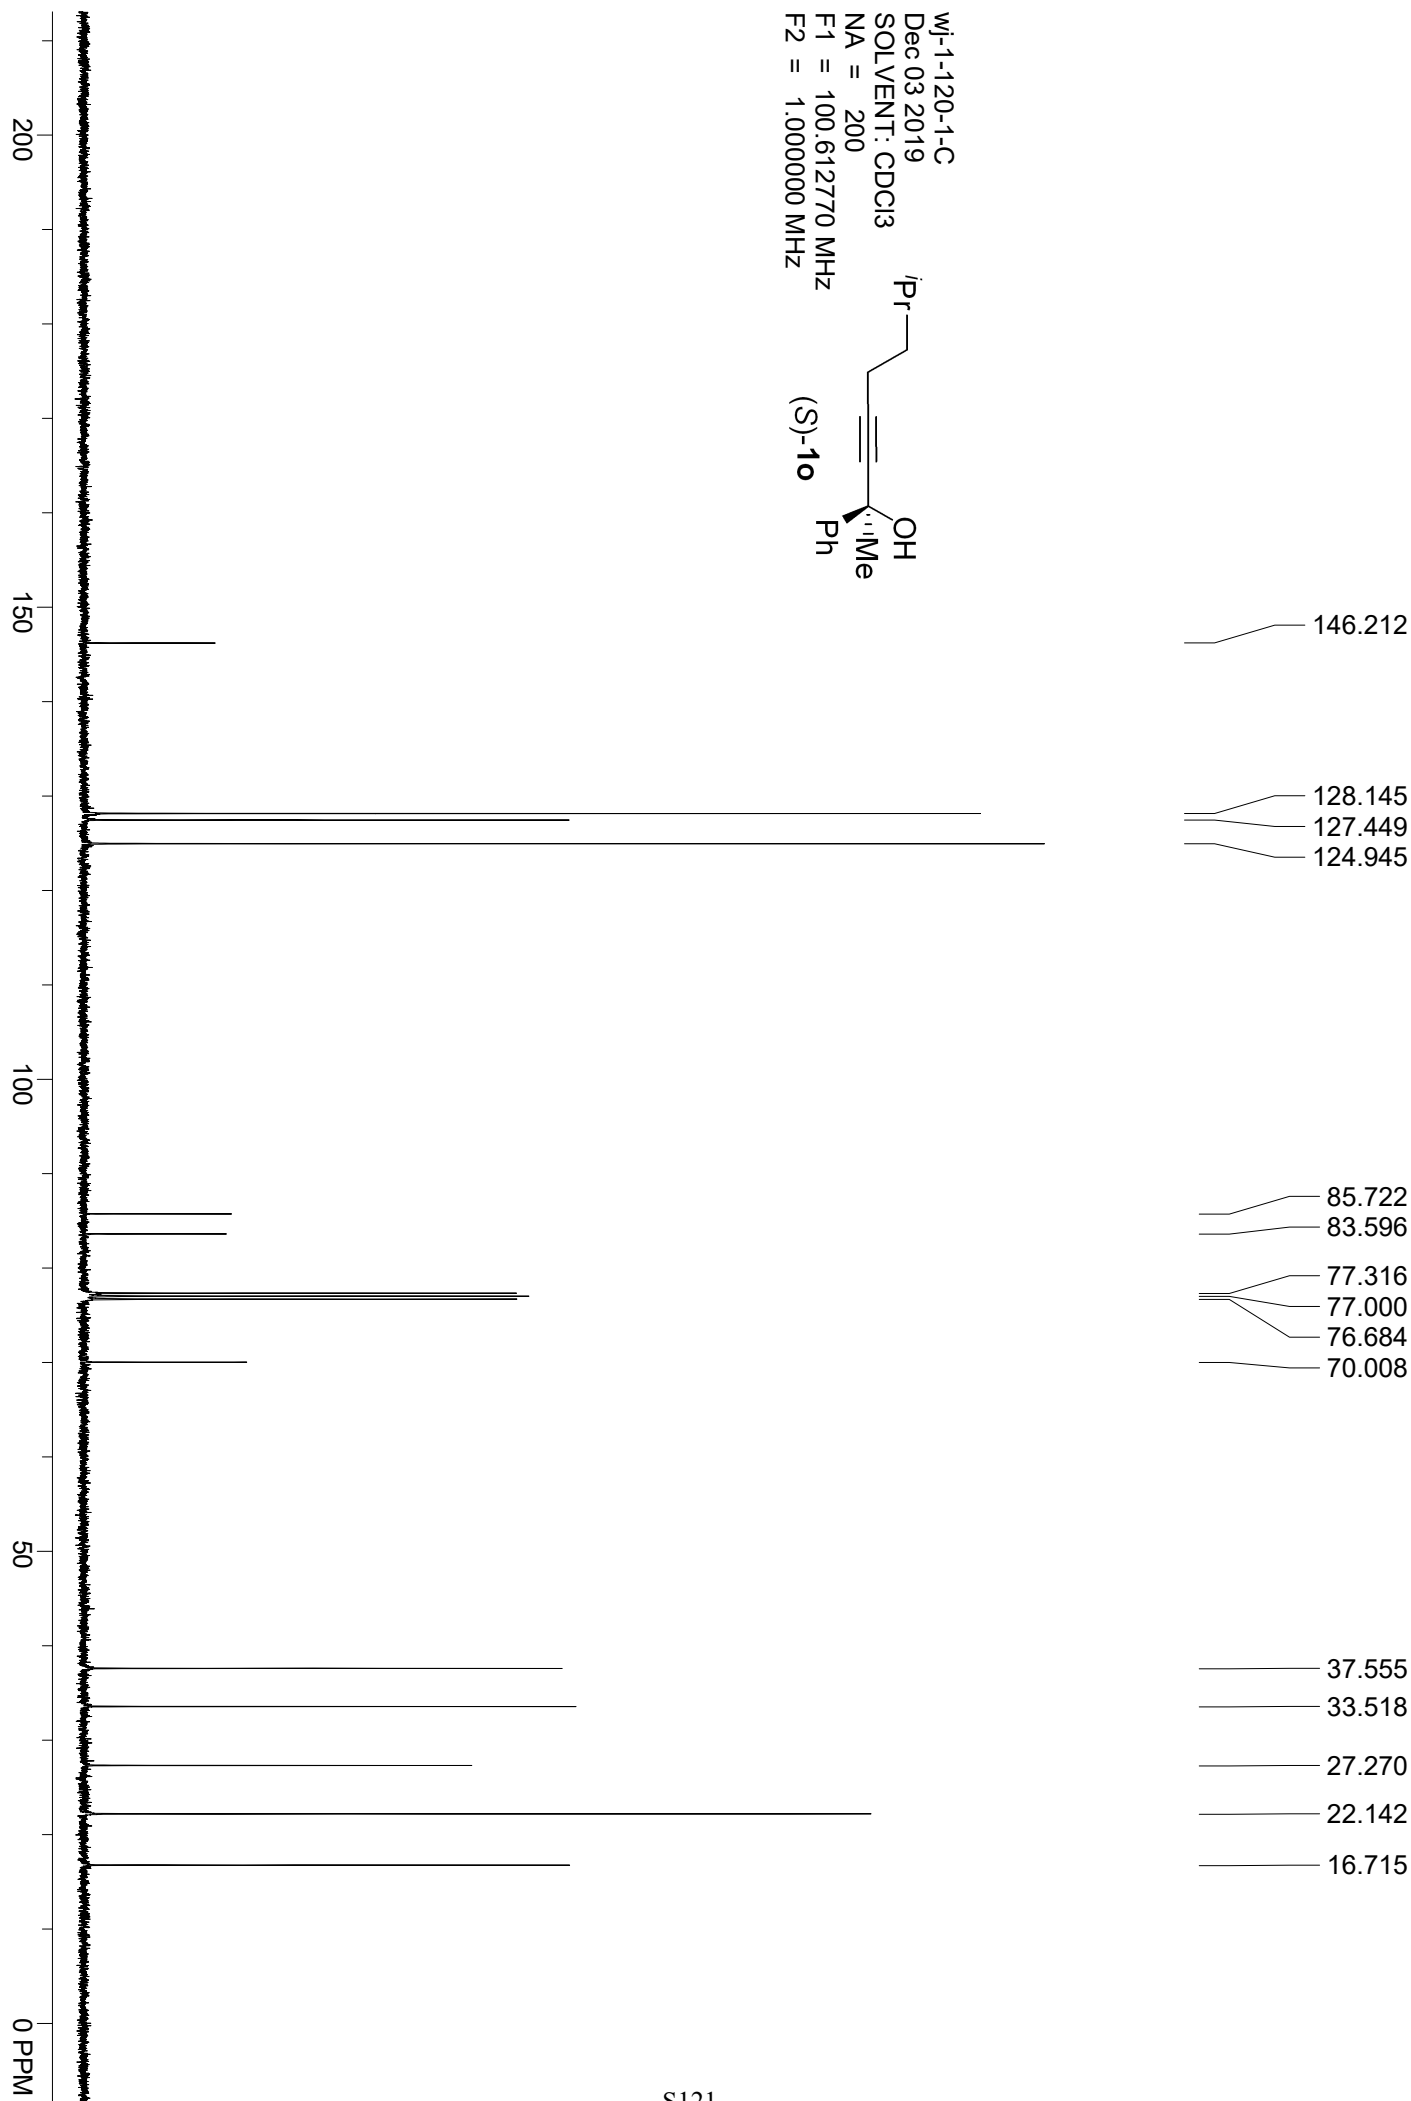

# Area Percent Report



Agilent Technologies

sample wj-1-120-1-AS-H-98-2-1.0-214

Data file: C:\Users\Public\Documents\ChemStation\1\Data\zwf-allenioc acid\_LC 2019-12-03 19-19-43\002-P2-C1-wj-1-120-1.D

## Acquisition Data:

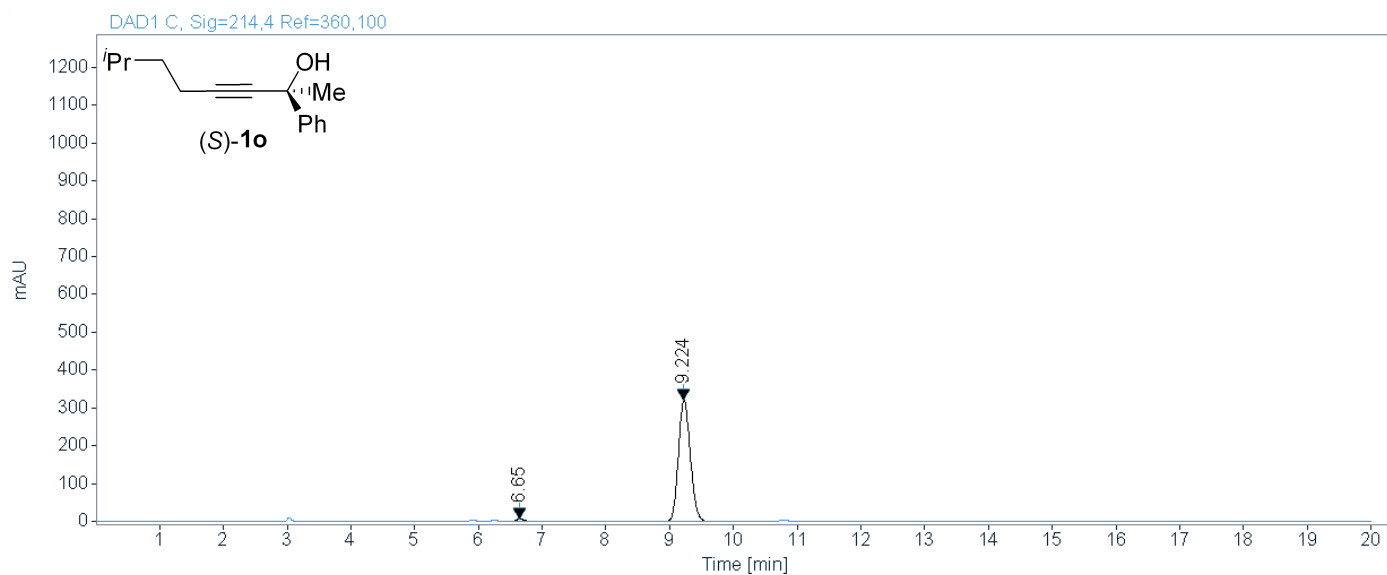

Signal: DAD1 C, Sig=214,4 Ref=360,100

| RT [min] | Width [min] | Height   | Area      | Area%    |
|----------|-------------|----------|-----------|----------|
| 6.650    | 0.1378      | 6.9647   | 61.9364   | 1.4505   |
| 9.224    | 0.2045      | 321.9935 | 4208.0449 | 98.5495  |
|          |             | Sum      | 4269.9813 | 100.0000 |

# Area Percent Report



Agilent Technologies

sample wj-1-120-1-rac-AS-H-98-2-1.0-214

Data file: C:\Users\Public\Documents\ChemStation\1\Data\zwf-allenioc acid\_LC 2019-12-03 19-19-43\003-P2-C2-wj-1-120-1-rac.D

## Acquisition Data:

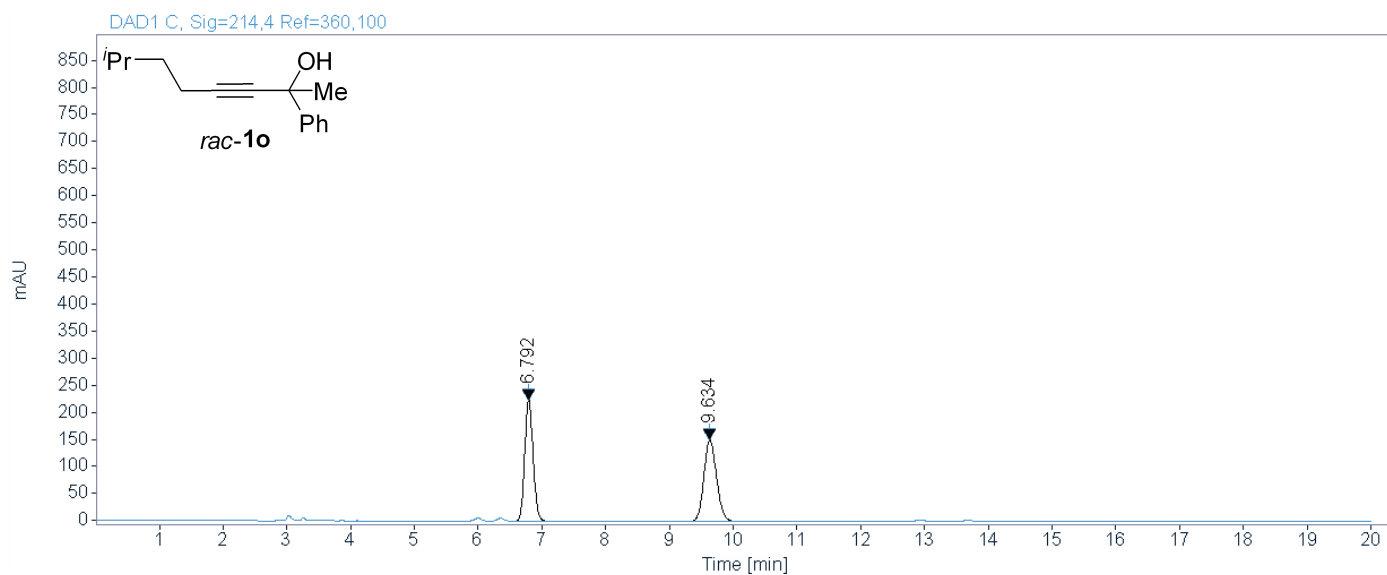

Signal: DAD1 C, Sig=214,4 Ref=360,100

| RT [min] | Width [min] | Height   | Area      | Area%    |
|----------|-------------|----------|-----------|----------|
| 6.792    | 0.1431      | 224.1575 | 2058.3005 | 49.8814  |
| 9.634    | 0.2146      | 150.2552 | 2068.0857 | 50.1186  |
|          | Sum         |          | 4126.3862 | 100.0000 |

WJ-1-057-1-H  
Sep 18 2019  
SOLVENT: CDCl3  
NA = 4  
F1 = 400.130005 MHz  
F2 = 1.000000 MHz

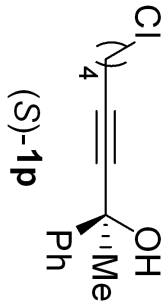

7.648  
7.629  
7.369  
7.350  
7.332  
7.293  
7.275  
7.257  
7.250

3.581  
3.564  
3.548

2.384  
2.343  
2.326  
2.308  
1.940  
1.923  
1.906  
1.887  
1.870  
1.784  
1.741  
1.727  
1.708  
1.690  
1.673  
1.258  
-0.000

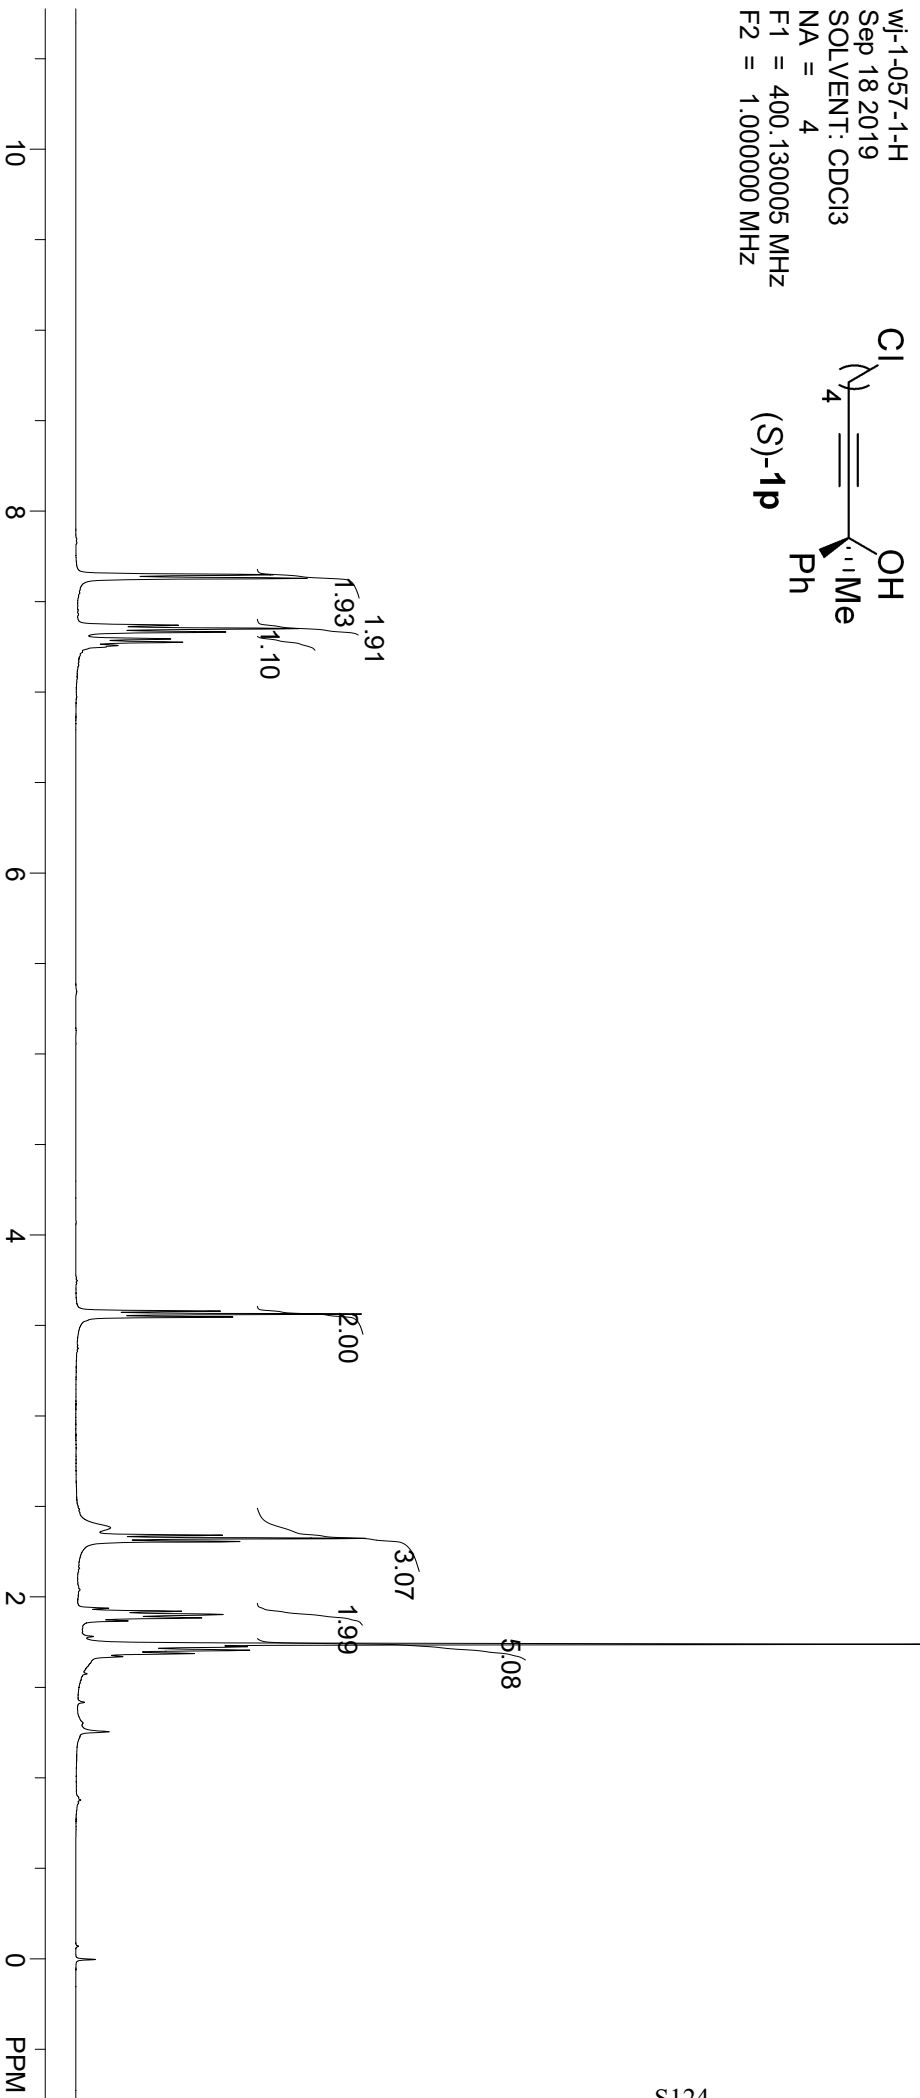

wj-1-057-1-C  
Sep 18 2019  
SOLVENT: CDCl3  
NA = 200  
F1 = 100.612770 MHz  
F2 = 1.000000 MHz

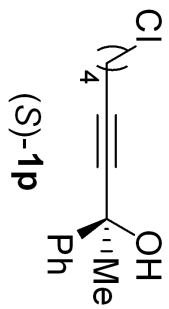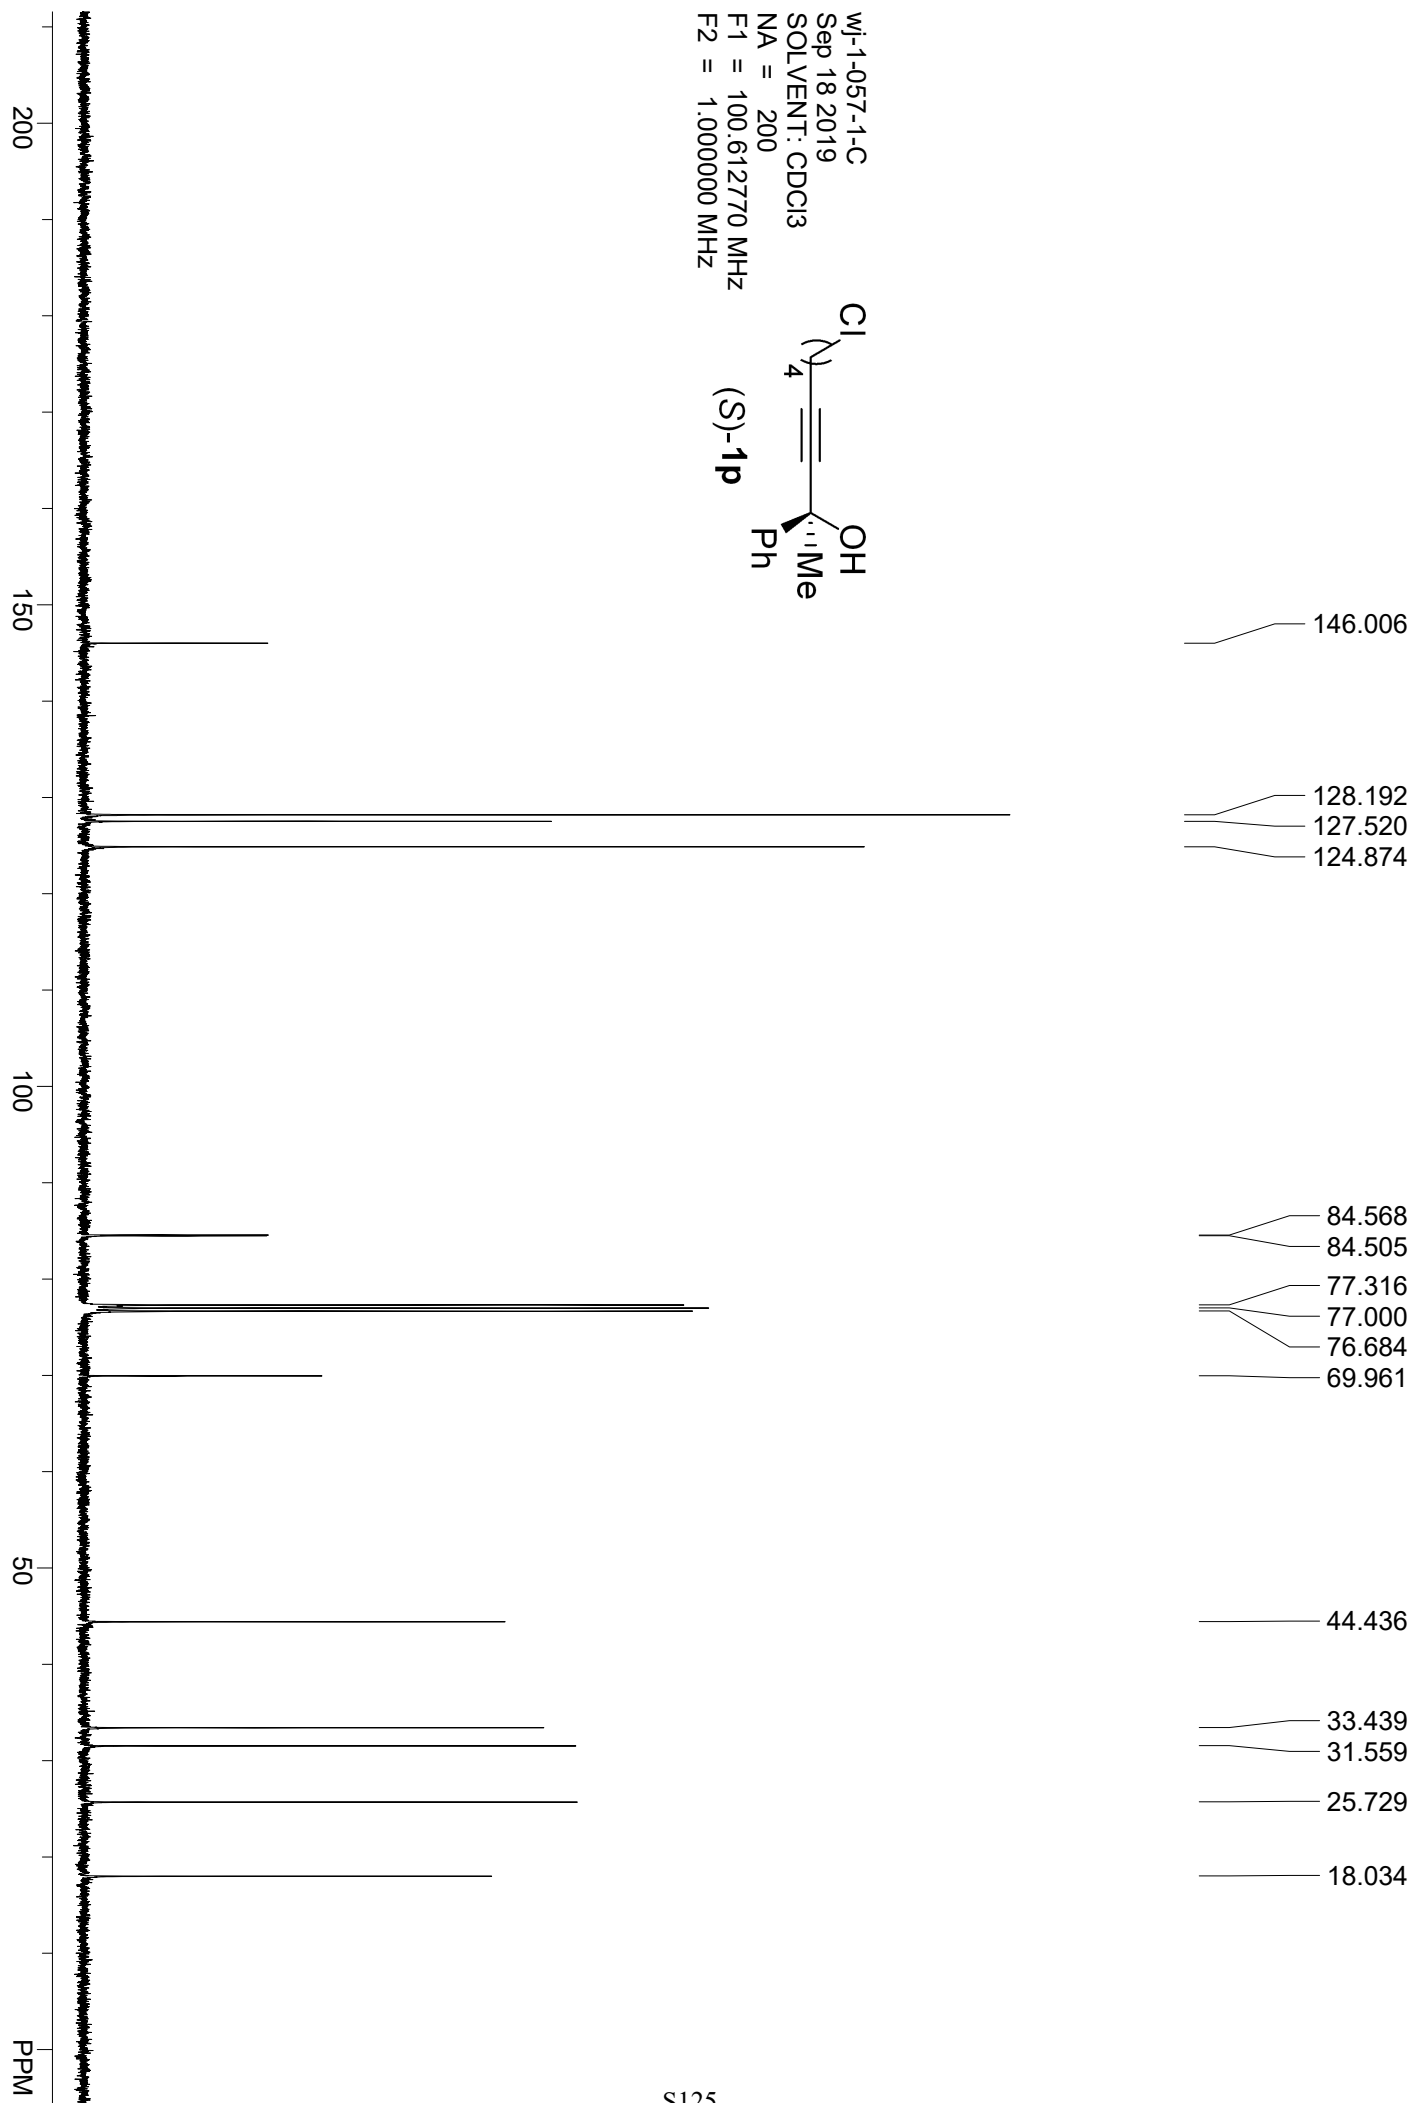

# Area Percent Report



sample wj-1-057-1-AS-H-95-5-1.0-214

Data file: C:\Users\Public\Documents\ChemStation\1\Data\wgl 2019-09-18 08-46-24\053-P2-C1-wj-1-057-1.D

## Acquisition Data:

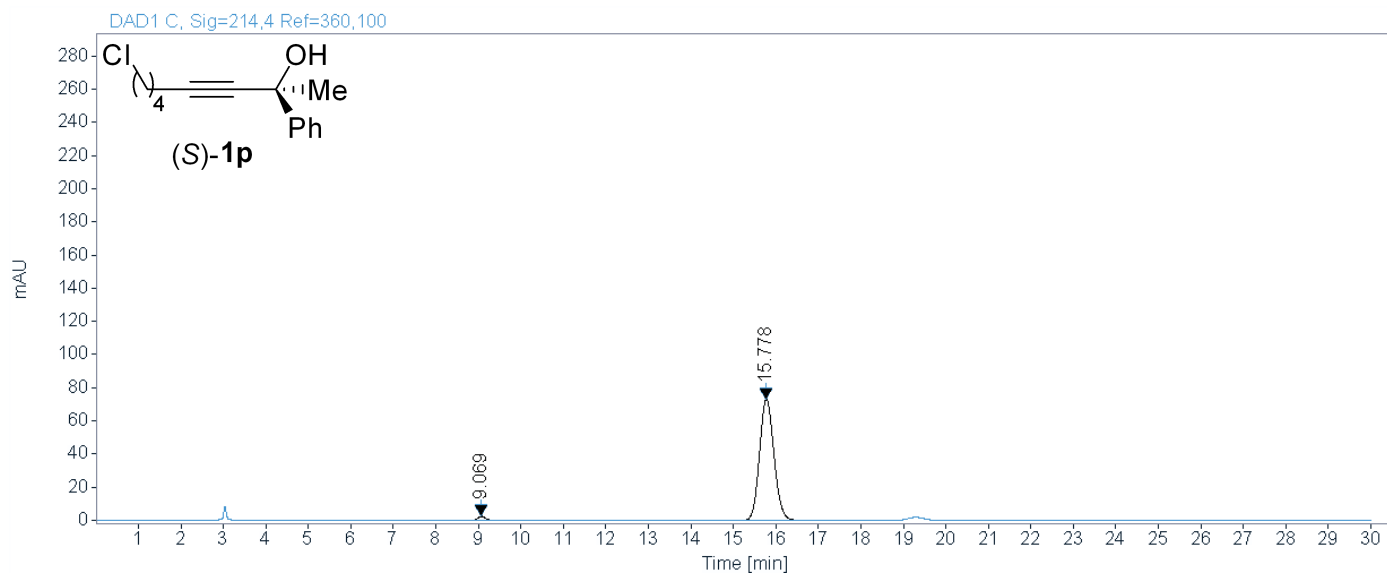

Signal: DAD1 C, Sig=214,4 Ref=360,100

| RT [min] | Width [min] | Height  | Area      | Area%    |
|----------|-------------|---------|-----------|----------|
| 9.069    | 0.1916      | 2.4201  | 29.7949   | 1.6814   |
| 15.778   | 0.3692      | 73.3359 | 1742.2300 | 98.3186  |
| Sum      |             |         | 1772.0249 | 100.0000 |

# Area Percent Report



Agilent Technologies

sample wj-1-057-1-rac-AS-H-95-5-1.0-214

Data file: C:\Users\Public\Documents\ChemStation\1\Data\wgl 2019-09-18 08-46-24\054-P2-C2-wj-1-057-1-rac.D

## Acquisition Data:

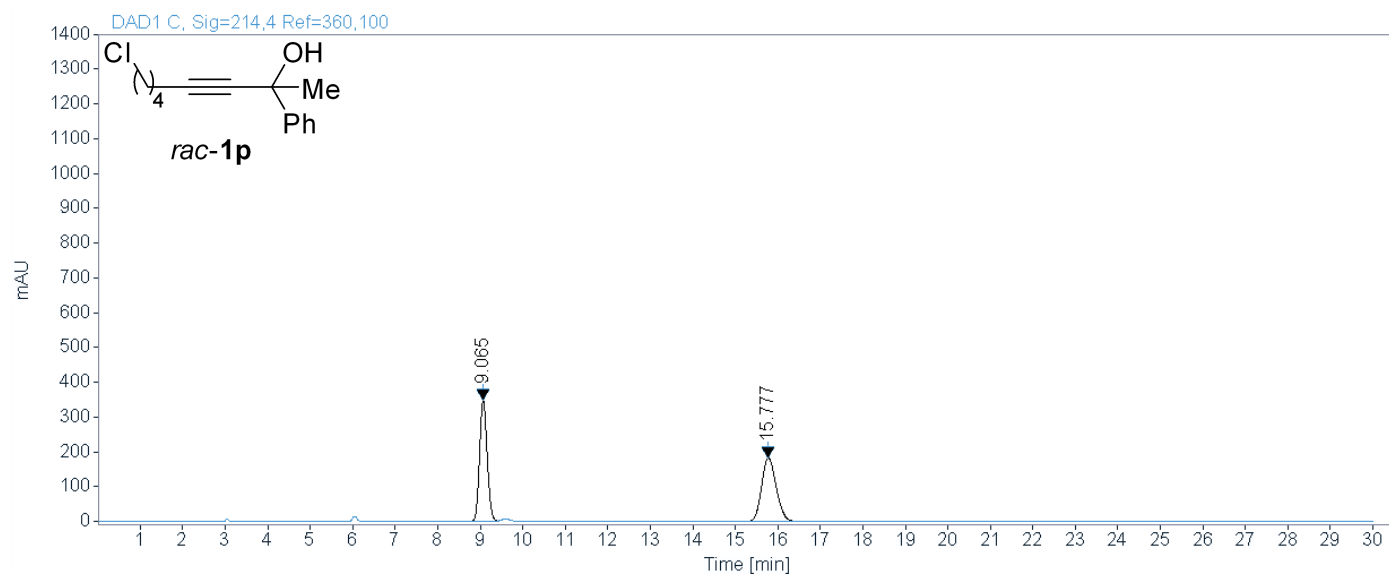

Signal: DAD1 C, Sig=214,4 Ref=360,100

| RT [min] | Width [min] | Height   | Area      | Area%    |
|----------|-------------|----------|-----------|----------|
| 9.065    | 0.2079      | 349.9830 | 4366.1230 | 49.8629  |
| 15.777   | 0.3709      | 183.6236 | 4390.1318 | 50.1371  |
| Sum      |             |          | 8756.2549 | 100.0000 |

wj-1-111-1-1-H  
Nov 11 2019  
SOLVENT: CDCl3  
NA = 4  
F1 = 400.130035 MHz  
F2 = 1.000000 MHz

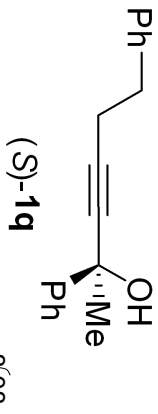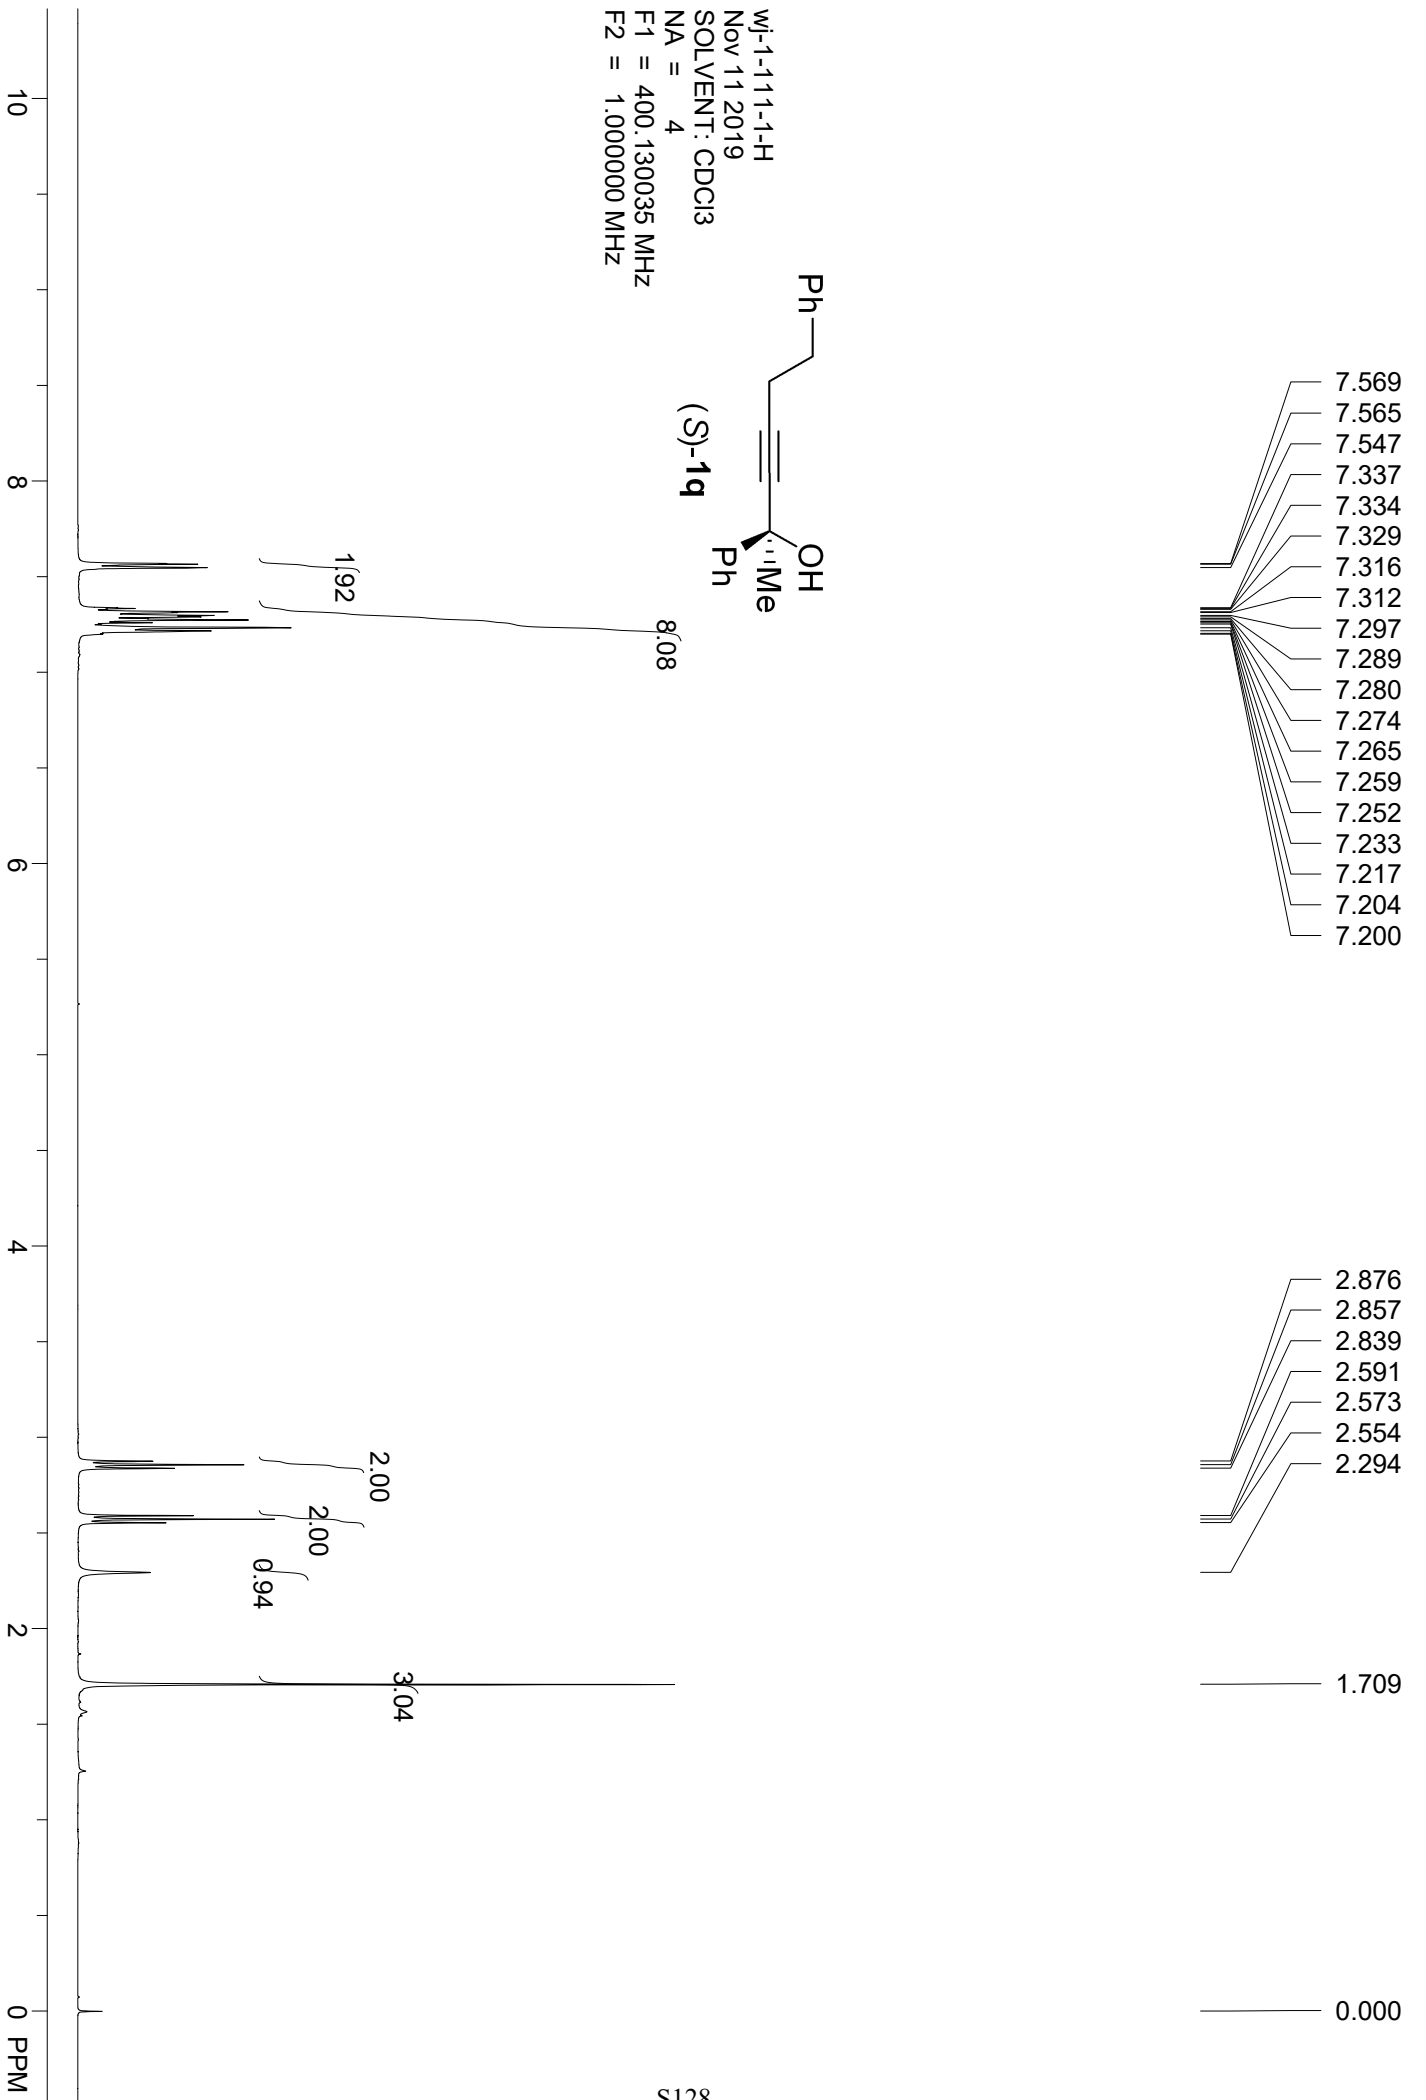



wf-1-11-1-1-C  
Nov 11 2019  
SOLVENT: CDCl3  
NA = 200  
F1 = 100.612770 MHz  
F2 = 1.000000 MHz

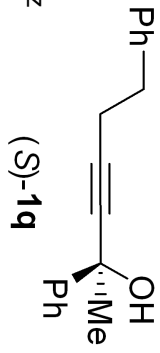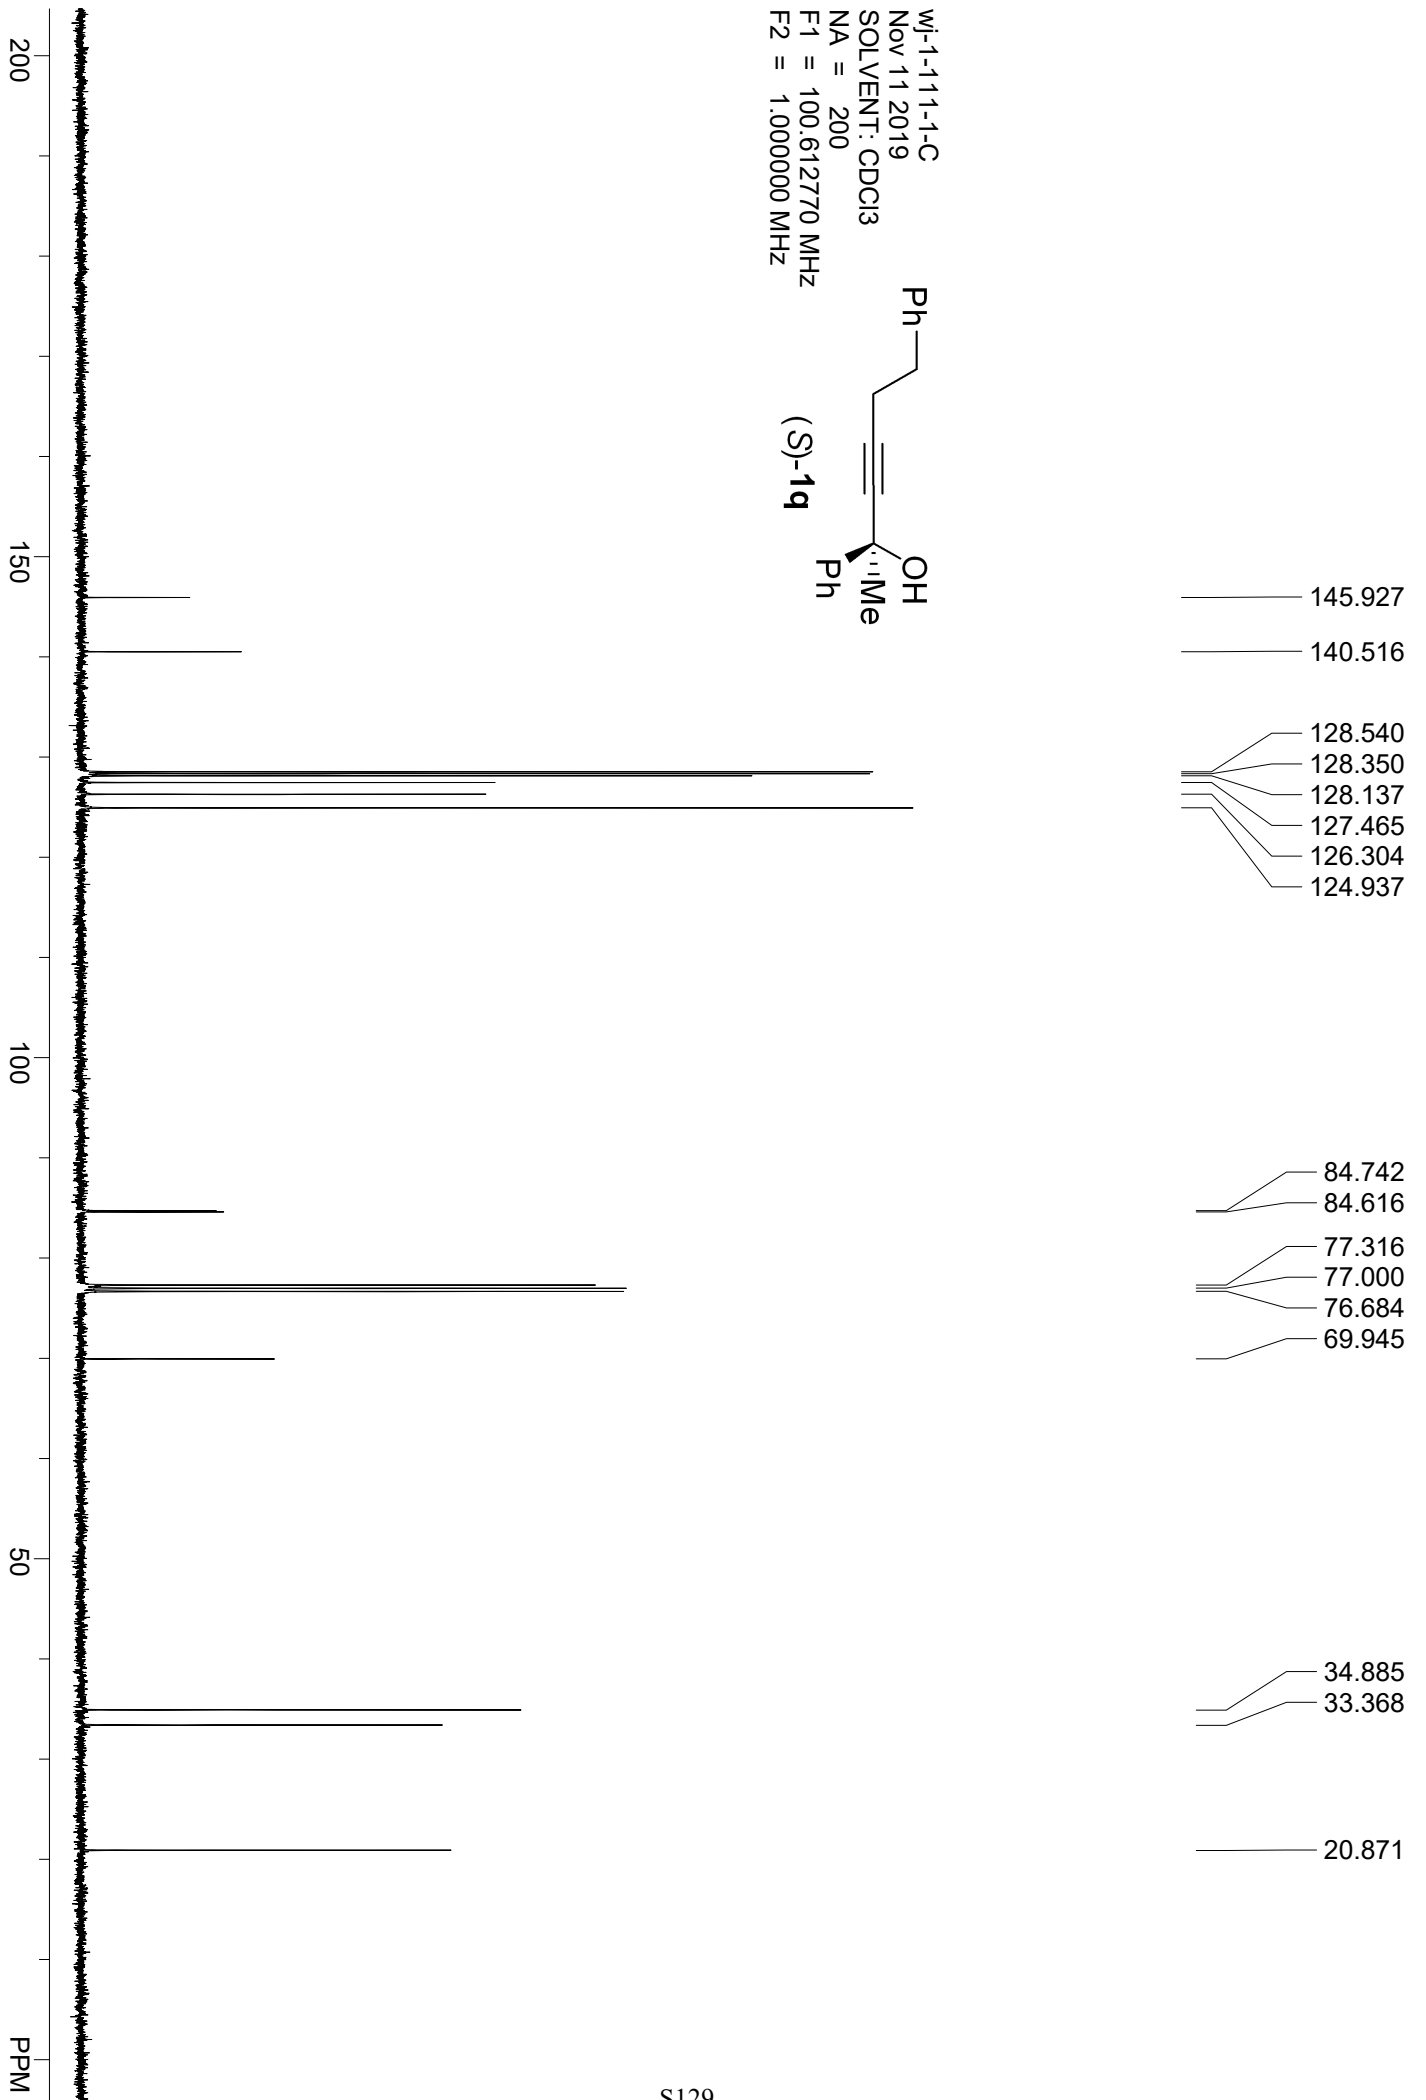

# Area Percent Report



sample wj-1-111-1-AS-H-98-2-1.0-214

Data file: C:\Users\Public\Documents\ChemStation\1\Data\YuanYuan 2019-11-11 18-50-01\017-P2-C1-wj-1-111-1.D

## Acquisition Data:

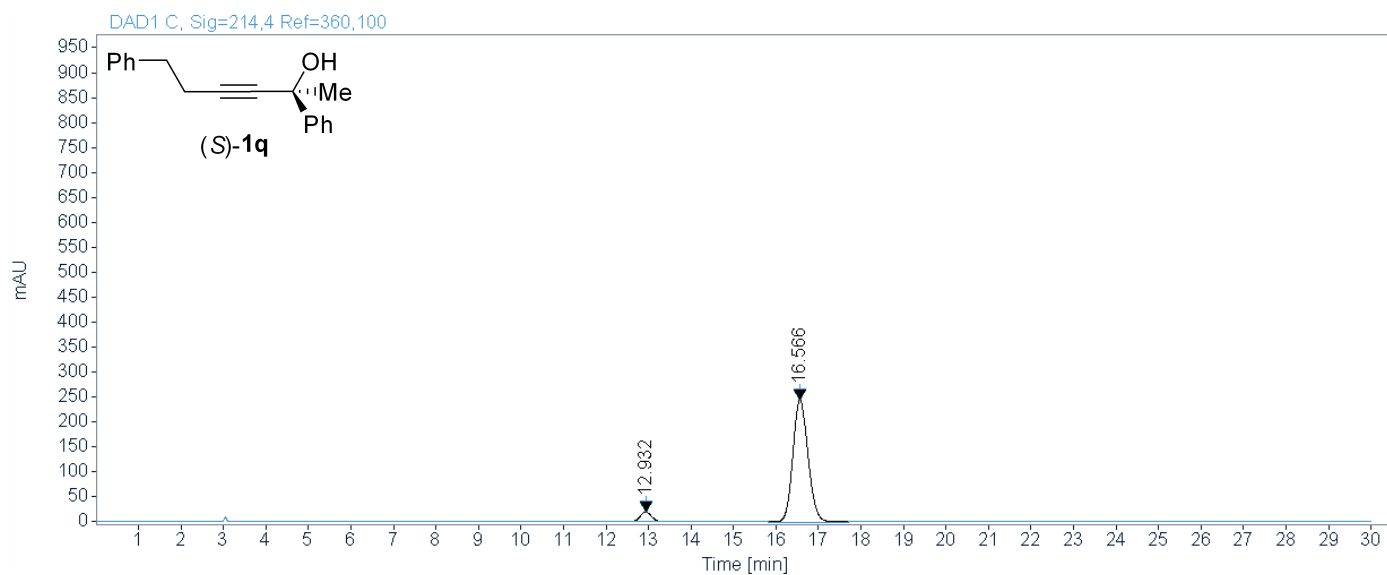

Signal: DAD1 C, Sig=214,4 Ref=360,100

| RT [min] | Width [min] | Height   | Area      | Area%    |
|----------|-------------|----------|-----------|----------|
| 12.932   | 0.3035      | 19.3830  | 353.0218  | 5.5040   |
| 16.566   | 0.4122      | 245.0556 | 6060.9170 | 94.4960  |
|          | Sum         |          | 6413.9388 | 100.0000 |

# Area Percent Report



Agilent Technologies

sample wj-1-111-1-rac-AS-H-98-2-1.0-214

Data file: C:\Users\Public\Documents\ChemStation\1\Data\YuanYuan 2019-11-11 18-50-01\018-P2-C2-wj-1-111-1-rac.D

## Acquisition Data:

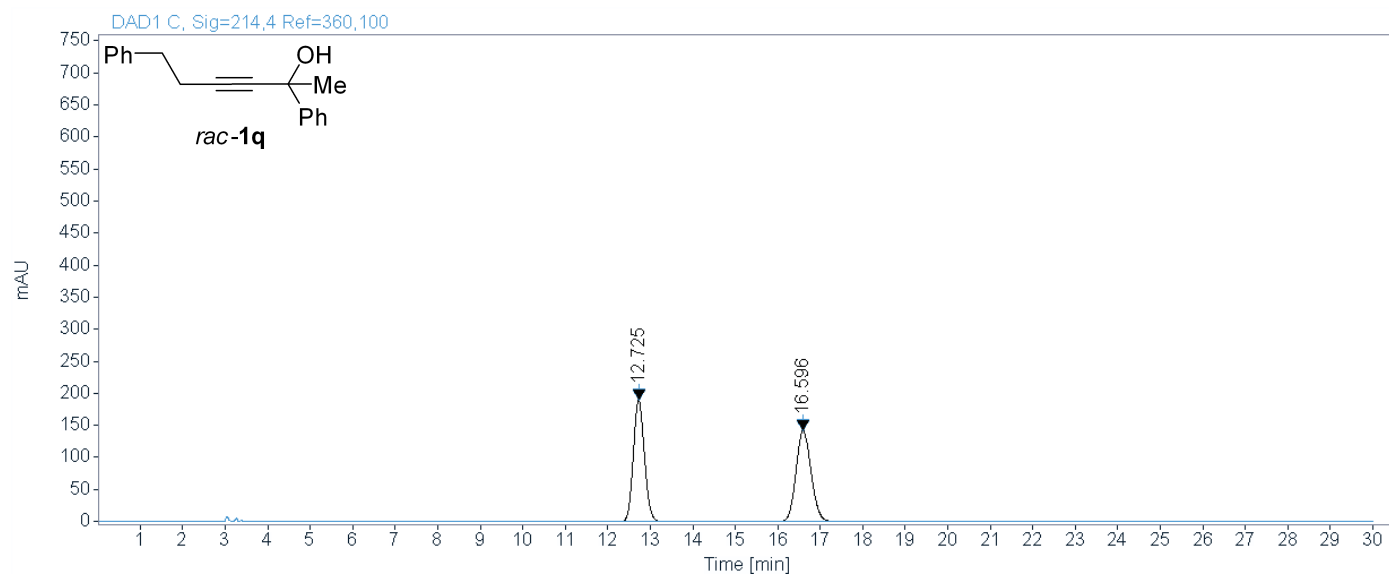

Signal: DAD1 C, Sig=214,4 Ref=360,100

| RT [min] | Width [min] | Height   | Area      | Area%    |
|----------|-------------|----------|-----------|----------|
| 12.725   | 0.2820      | 189.8749 | 3450.9958 | 49.9081  |
| 16.596   | 0.3812      | 141.6962 | 3463.6985 | 50.0919  |
|          | Sum         |          | 6914.6943 | 100.0000 |

7.627  
7.609  
7.378  
7.360  
7.341  
7.304  
7.287  
7.268  
7.257

2.499  
2.481  
2.465  
2.449  
1.925  
1.908  
1.891  
1.873  
1.856  
1.748  
1.256

-0.000

wj-1-082-1-H  
Oct 17 2019  
SOLVENT: CDCl3  
NA = 4  
F1 = 400.130005 MHz  
F2 = 1.000000 MHz

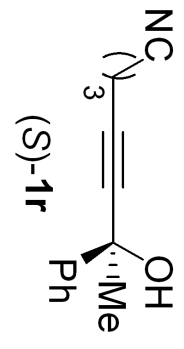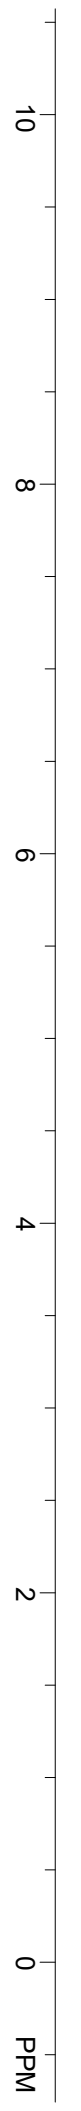

1.89  
1.96  
1.09

5.02

2.00

3.15

WJ-1-082-1-C  
Oct 17 2019  
SOLVENT: CDCl3  
NA = 256  
F1 = 100.612770 MHz  
F2 = 1.000000 MHz

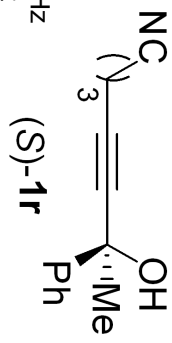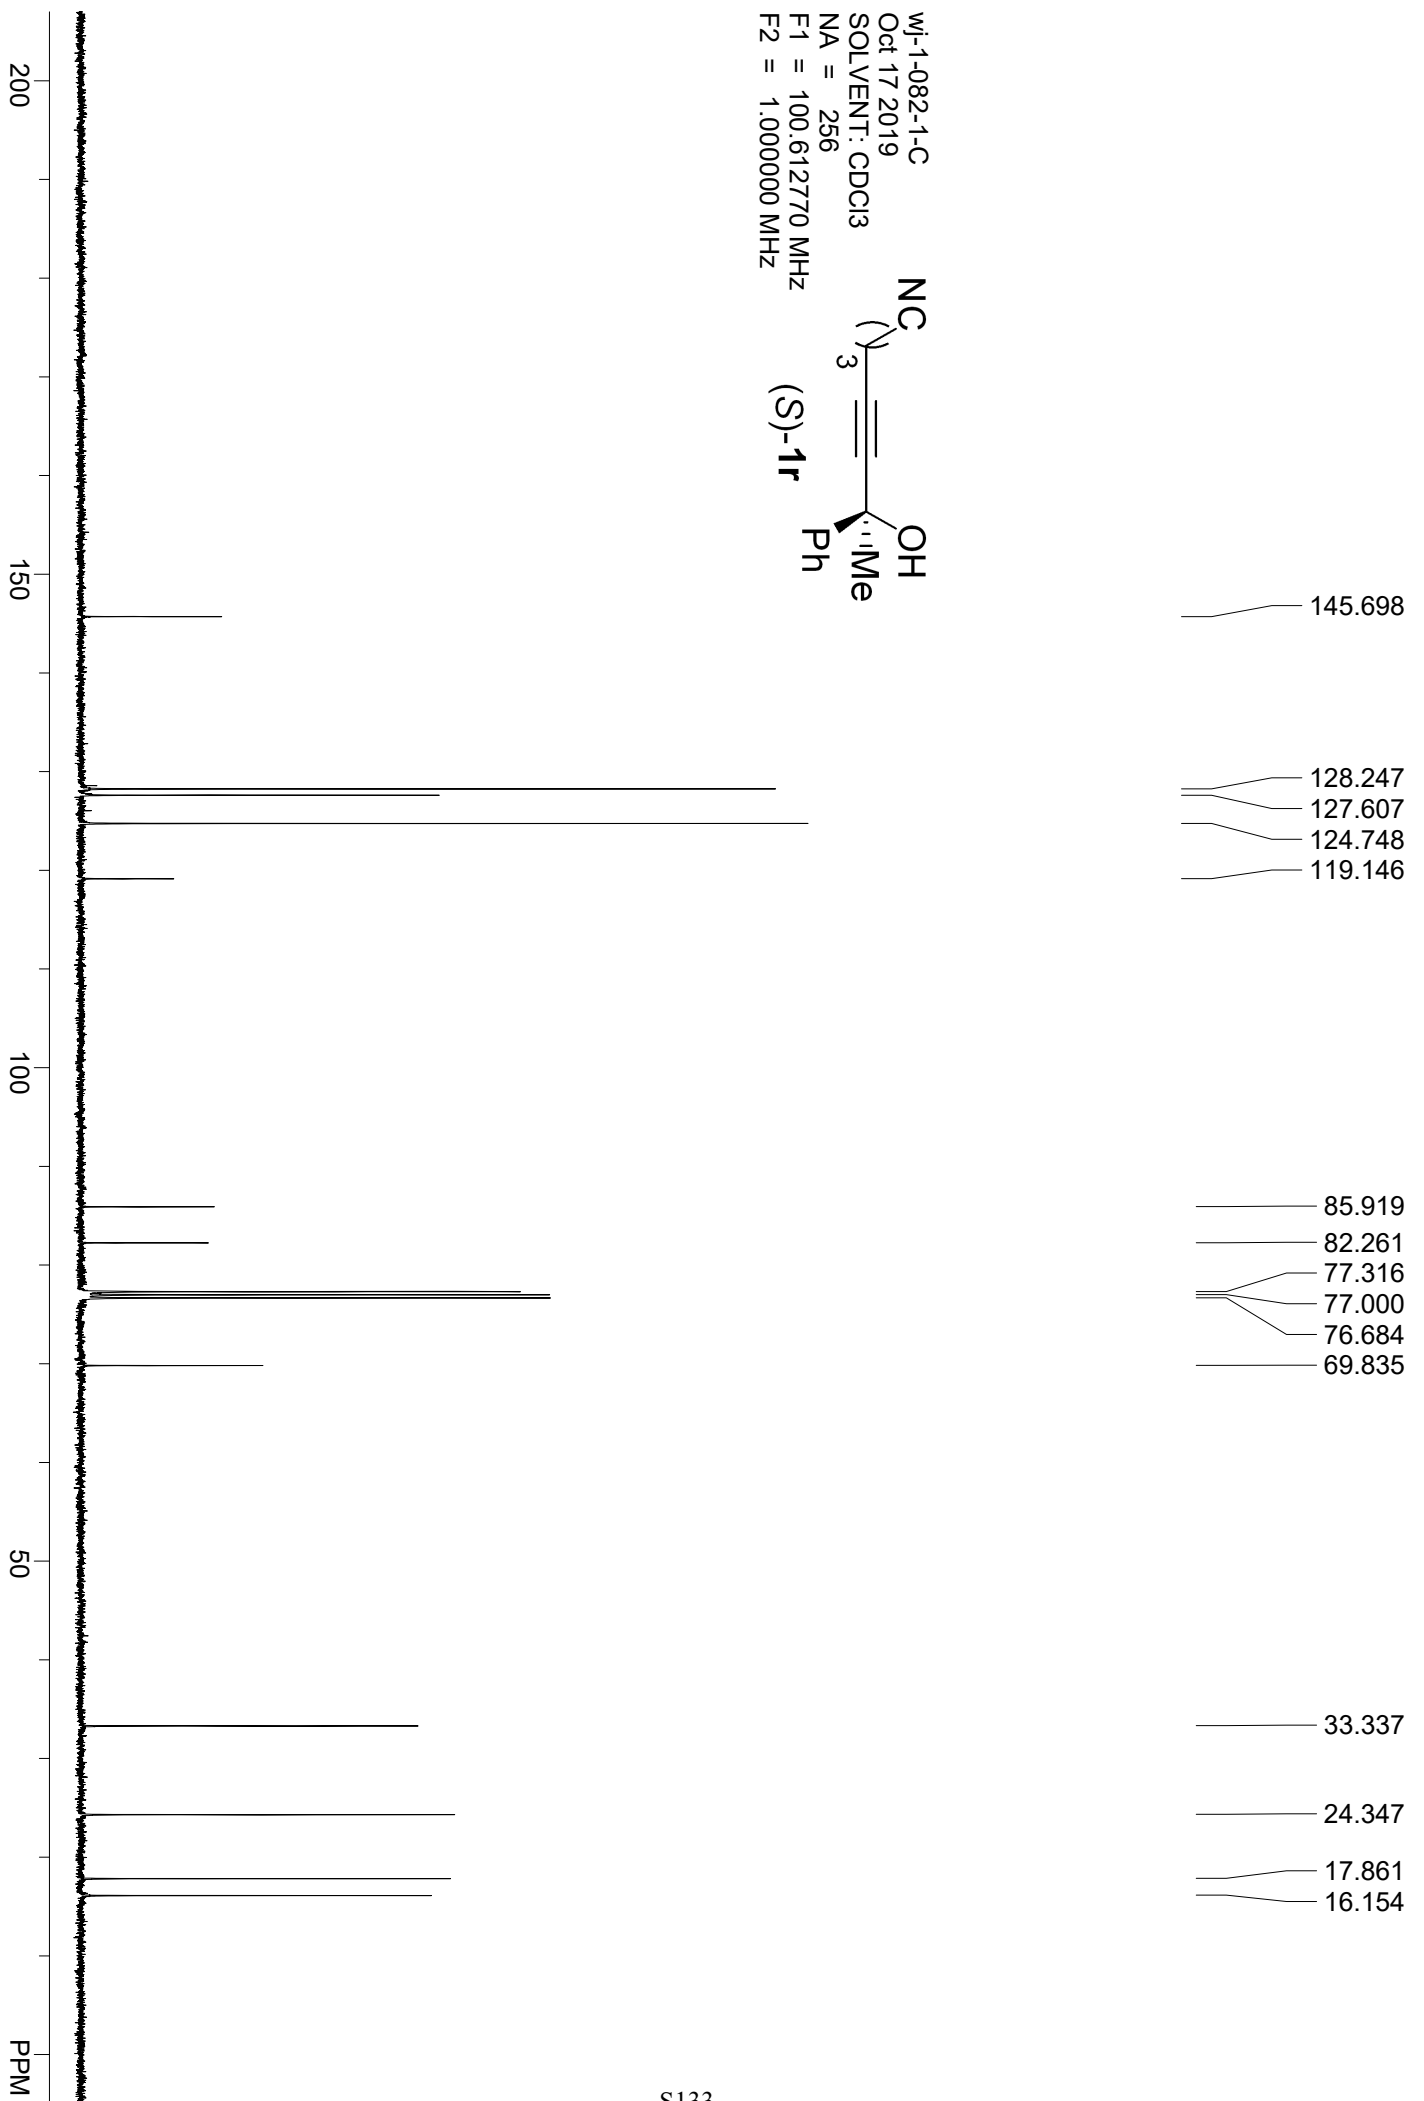

# Area Percent Report



Agilent Technologies

sample wj-1-082-1-AS-H-90-10-1.0-214

Data file: C:\Users\Public\Documents\ChemStation\1\Data\WJ\_LC 2019-10-17 17-55-02\004-P2-C1-wj-1-082-1.D

## Acquisition Data:

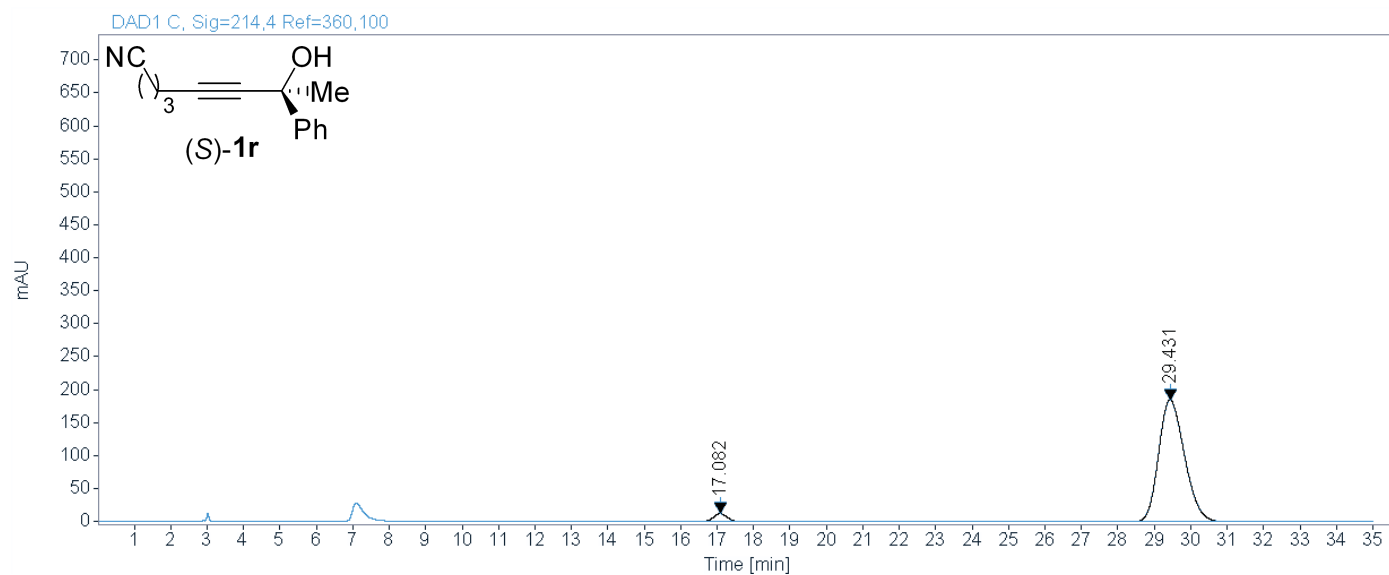

Signal: DAD1 C, Sig=214,4 Ref=360,100

| RT [min] | Width [min] | Height   | Area      | Area%    |
|----------|-------------|----------|-----------|----------|
| 17.082   | 0.4154      | 11.7621  | 293.1832  | 3.1193   |
| 29.431   | 0.7669      | 184.7821 | 9105.9668 | 96.8807  |
|          |             | Sum      | 9399.1500 | 100.0000 |

# Area Percent Report



Agilent Technologies

sample wj-1-082-1-rac-AS-H-90-10-1.0-214

Data file: C:\Users\Public\Documents\ChemStation\1\Data\WJ\_LC 2019-10-17 17-55-02\005-P2-C2-wj-1-082-1-rac.D

## Acquisition Data:

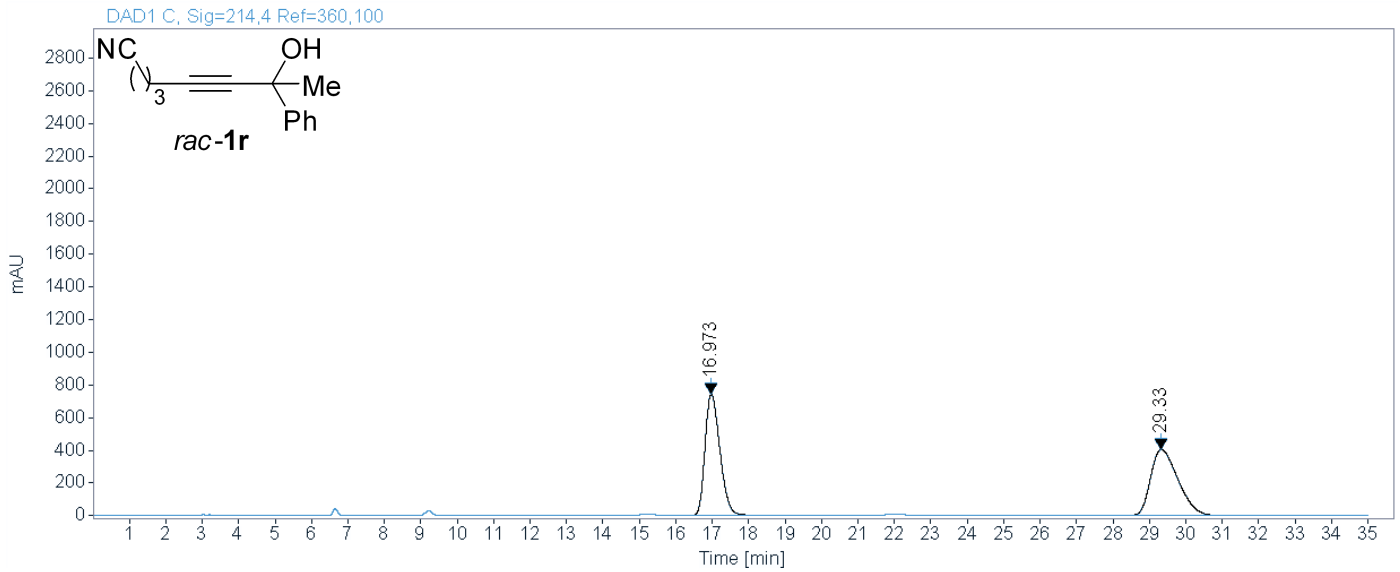

Signal: DAD1 C, Sig=214,4 Ref=360,100

| RT [min] | Width [min] | Height   | Area       | Area%    |
|----------|-------------|----------|------------|----------|
| 16.973   | 0.4430      | 745.3535 | 21145.2012 | 49.8992  |
| 29.330   | 0.8164      | 405.8014 | 21230.6484 | 50.1008  |
|          |             | Sum      | 42375.8496 | 100.0000 |

wj-1-134-H  
June 02 2020  
SOLVENT: CDCl3  
NA = 4  
F1 = 400.130035 MHz  
F2 = 1.000000 MHz

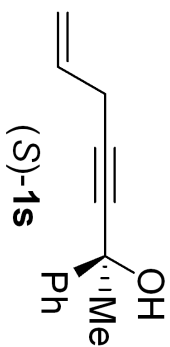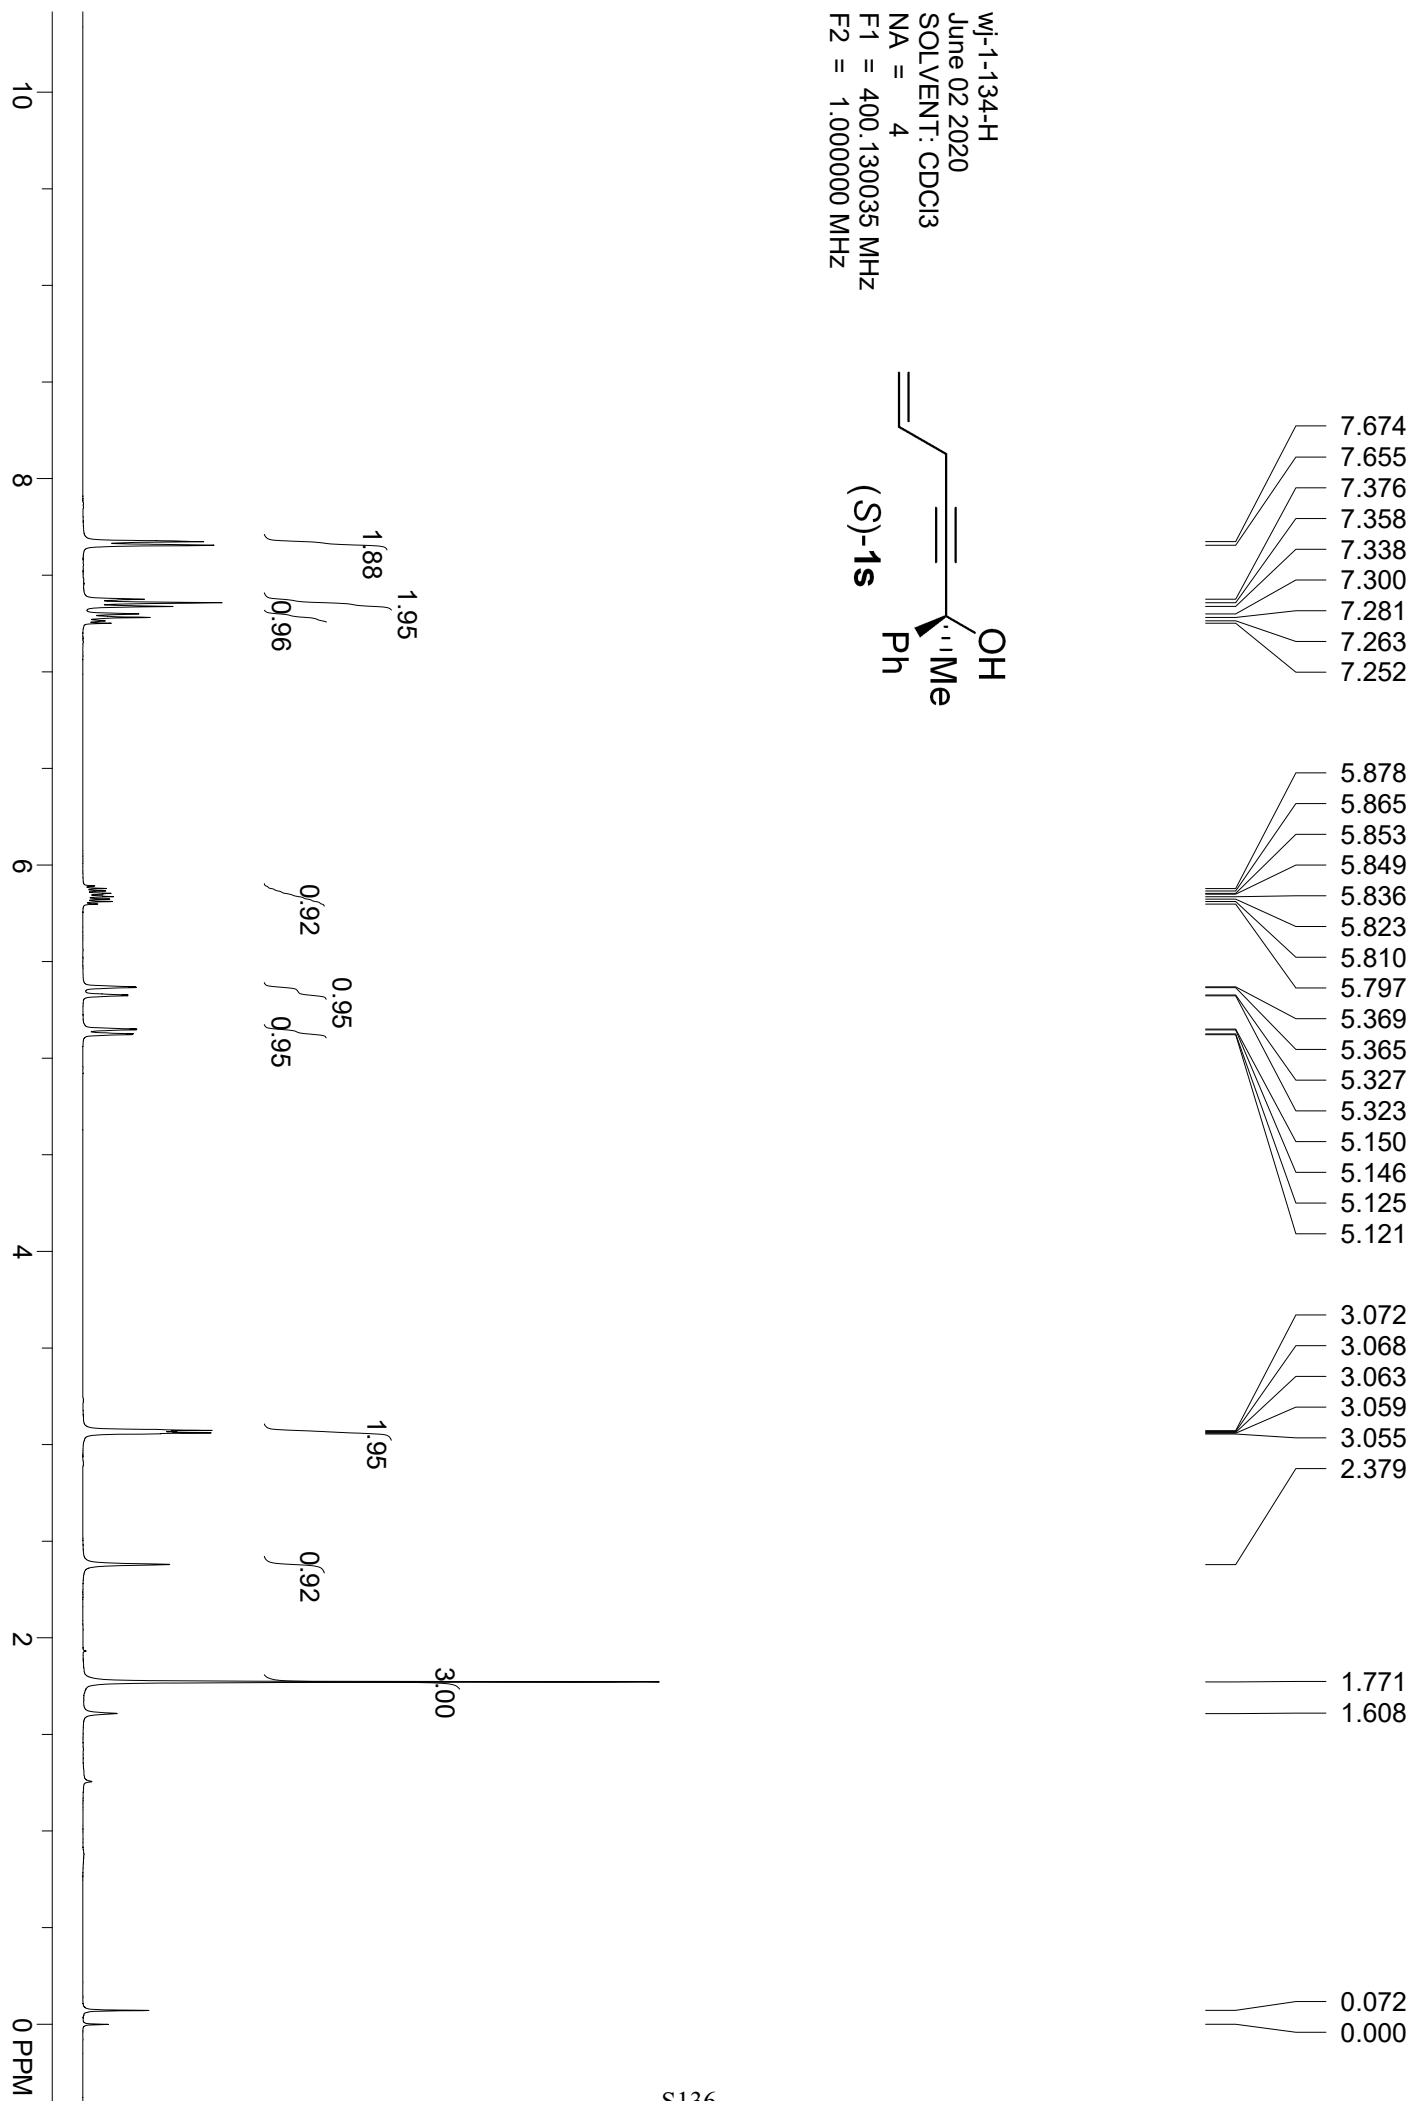



wj-1-134-C  
June 02 2020  
SOLVENT: CDCl3  
NA = 256  
F1 = 100.612770 MHz  
F2 = 1.000000 MHz

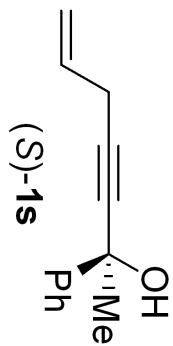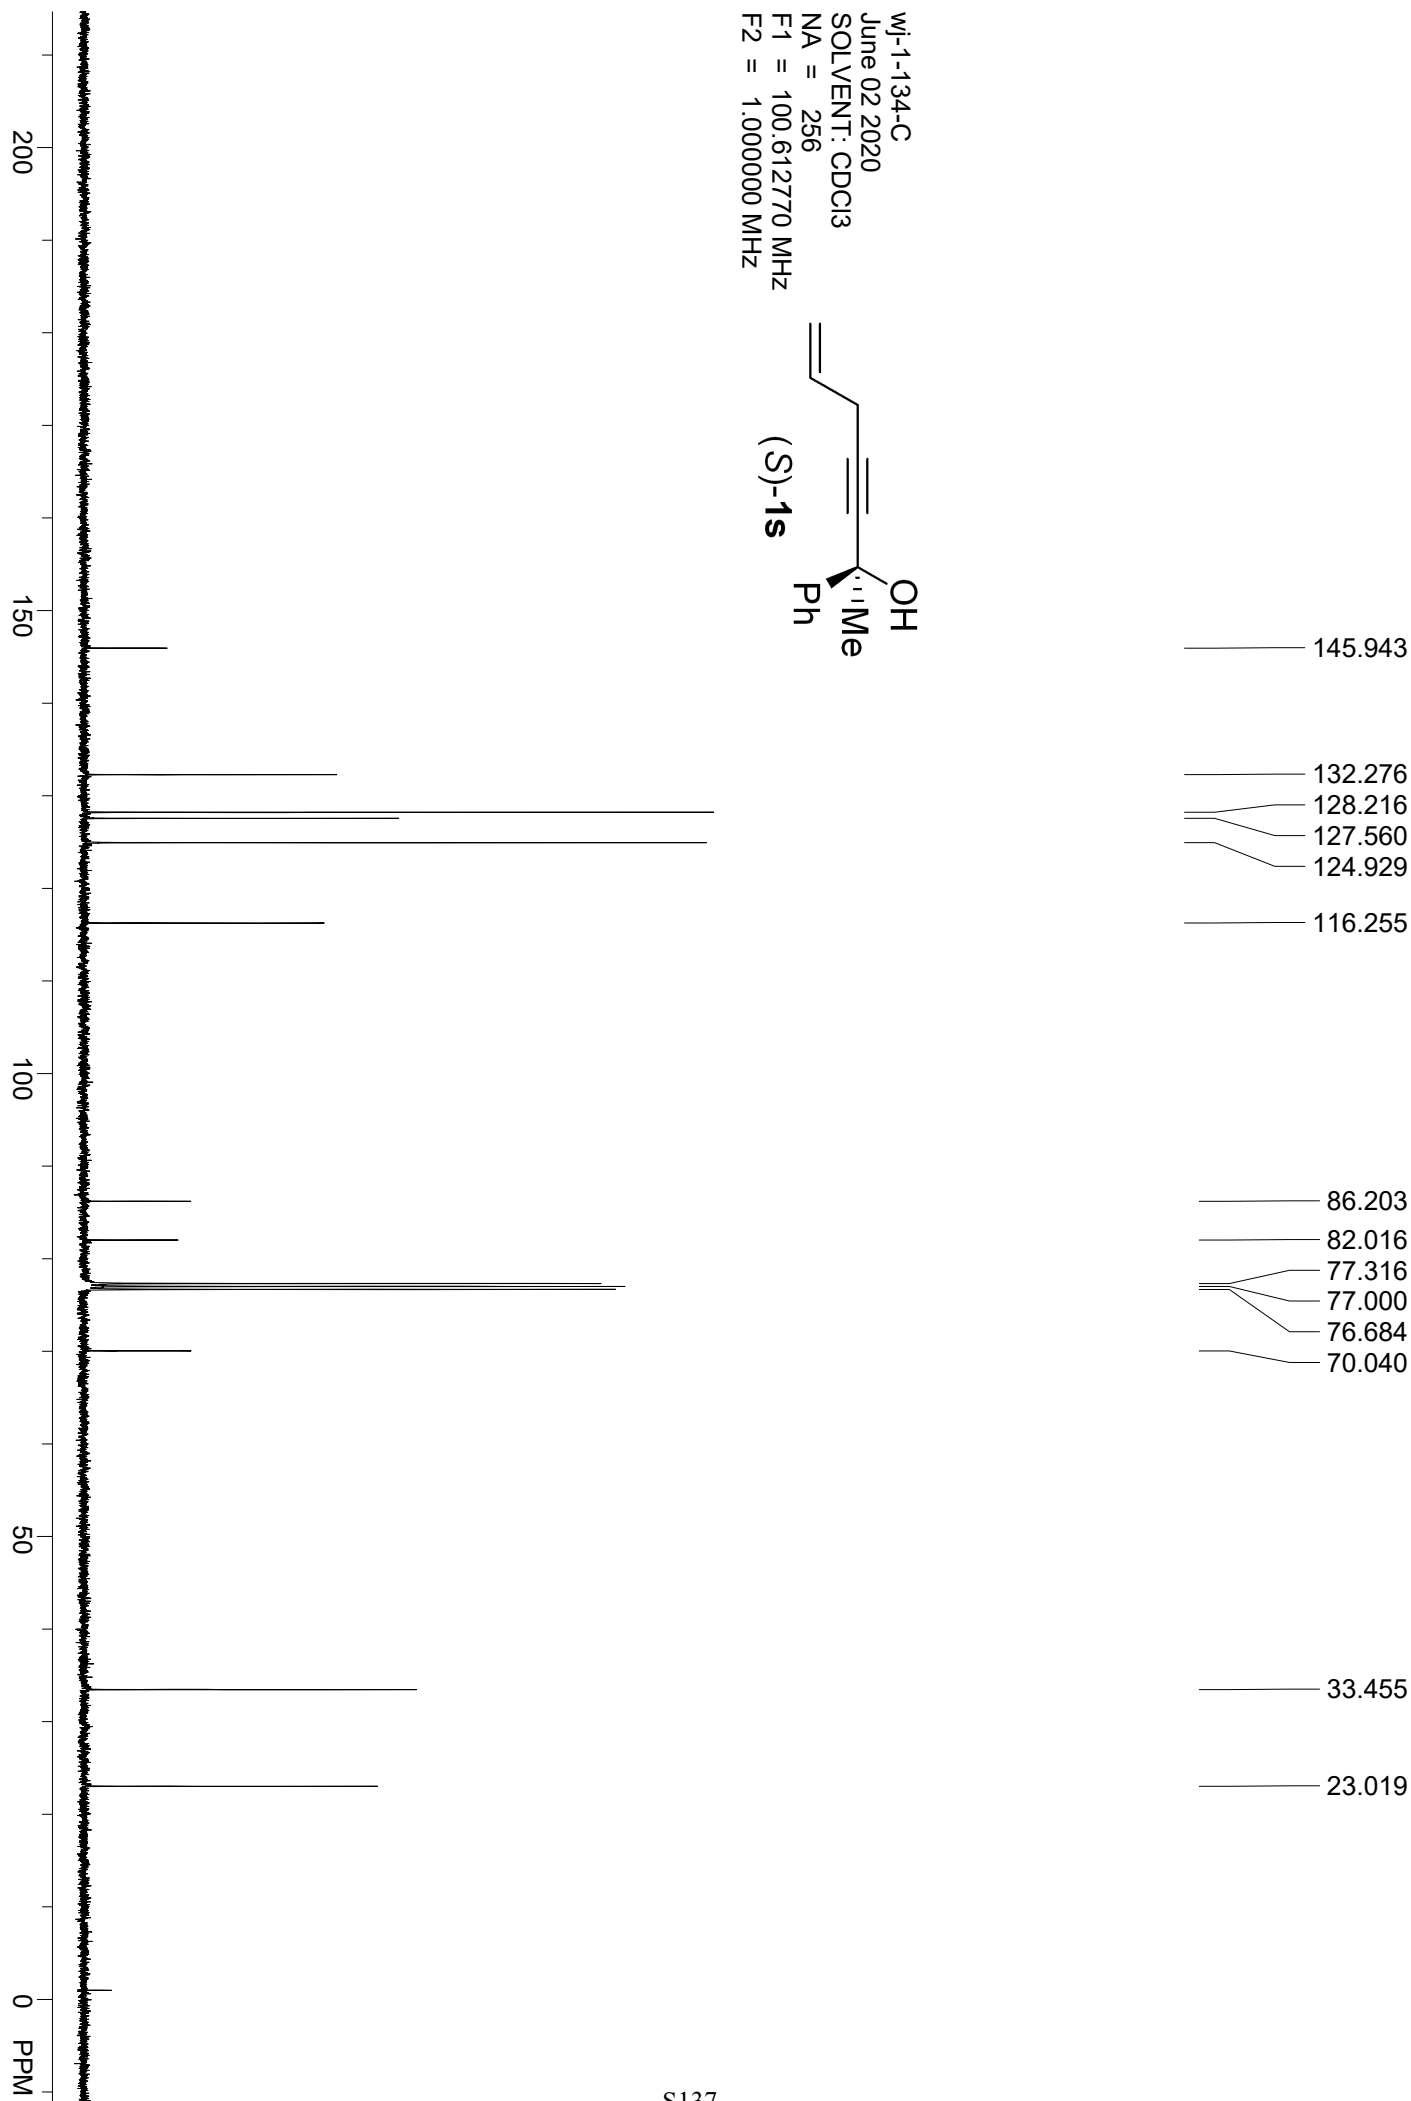

# Area Percent Report



Agilent Technologies

sample wj-1-134-AS-H-98-2-1.0-214

Data file: C:\Users\Public\Documents\ChemStation\1\Data\WJ\_LC 2020-06-02 12-57-04\002-P2-C1-wj-1-134.D

## Acquisition Data:

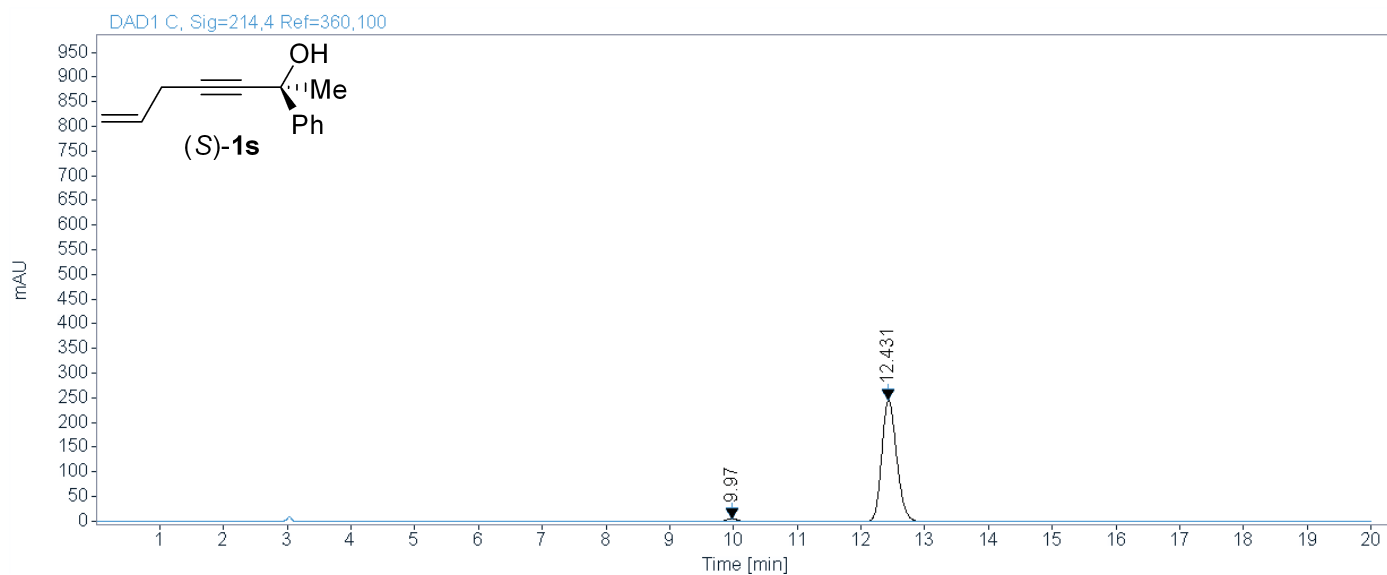

Signal: DAD1 C, Sig=214,4 Ref=360,100

| RT [min] | Width [min] | Height   | Area      | Area%    |
|----------|-------------|----------|-----------|----------|
| 9.970    | 0.1894      | 6.0447   | 74.3090   | 1.8280   |
| 12.431   | 0.2487      | 246.7380 | 3990.7153 | 98.1720  |
|          | Sum         |          | 4065.0243 | 100.0000 |

# Area Percent Report



Agilent Technologies

sample wj-1-134-rac-AS-H-98-2-1.0-214

Data file: C:\Users\Public\Documents\ChemStation\1\Data\WJ\_LC 2020-06-02 12-57-04\003-P2-C2-wj-1-134-rac.D

## Acquisition Data:

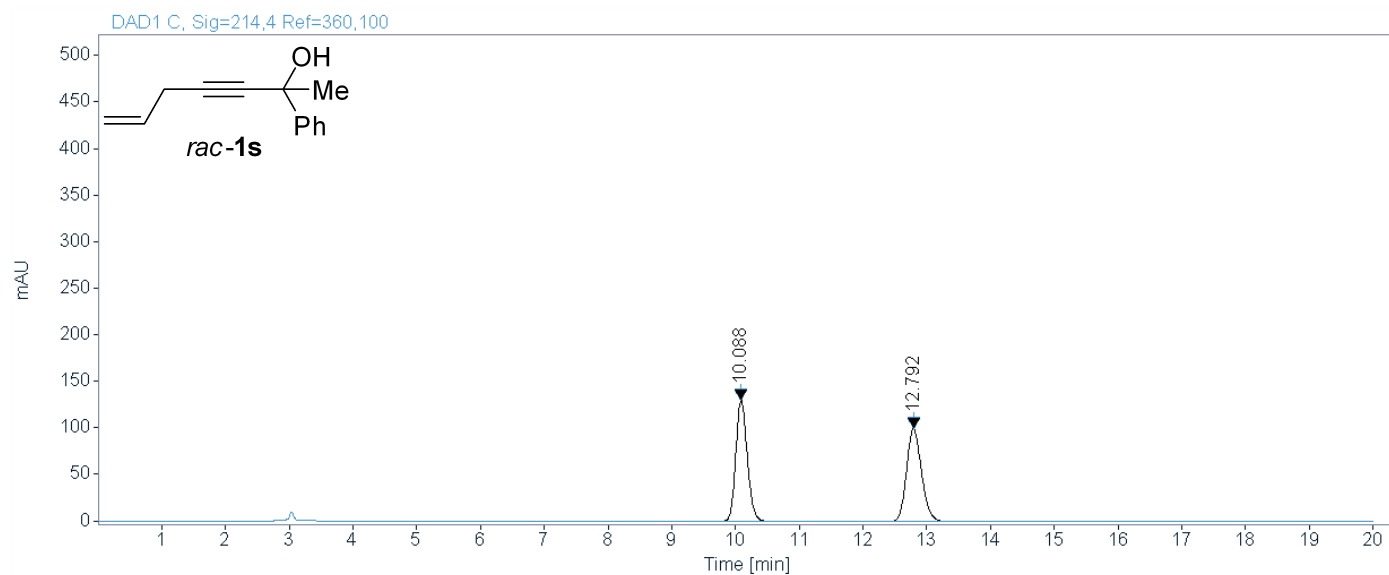

Signal: DAD1 C, Sig=214,4 Ref=360,100

| RT [min] | Width [min] | Height   | Area      | Area%    |
|----------|-------------|----------|-----------|----------|
| 10.088   | 0.1920      | 130.3764 | 1631.1051 | 49.9835  |
| 12.792   | 0.2531      | 99.6525  | 1632.1830 | 50.0165  |
|          |             | Sum      | 3263.2881 | 100.0000 |

7.735  
7.724  
7.722  
7.713  
7.242  
7.190  
7.182  
7.172  
7.168  
7.159  
7.152  
7.143  
7.129

2.261  
2.244  
2.226  
2.060  
2.042  
2.025  
2.577  
2.007  
1.995  
1.988  
1.977  
1.958  
1.942  
1.924  
1.611  
1.593  
1.575  
1.557  
1.539  
1.521  
1.017  
1.004  
0.999  
0.985  
0.980  
0.967  
-0.000

wj-1-122-1-H  
Dec 03 2019  
SOLVENT: CDCl3  
NA = 4  
F1 = 400.130005 MHz  
F2 = 1.000000 MHz

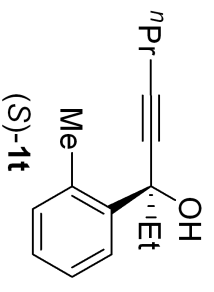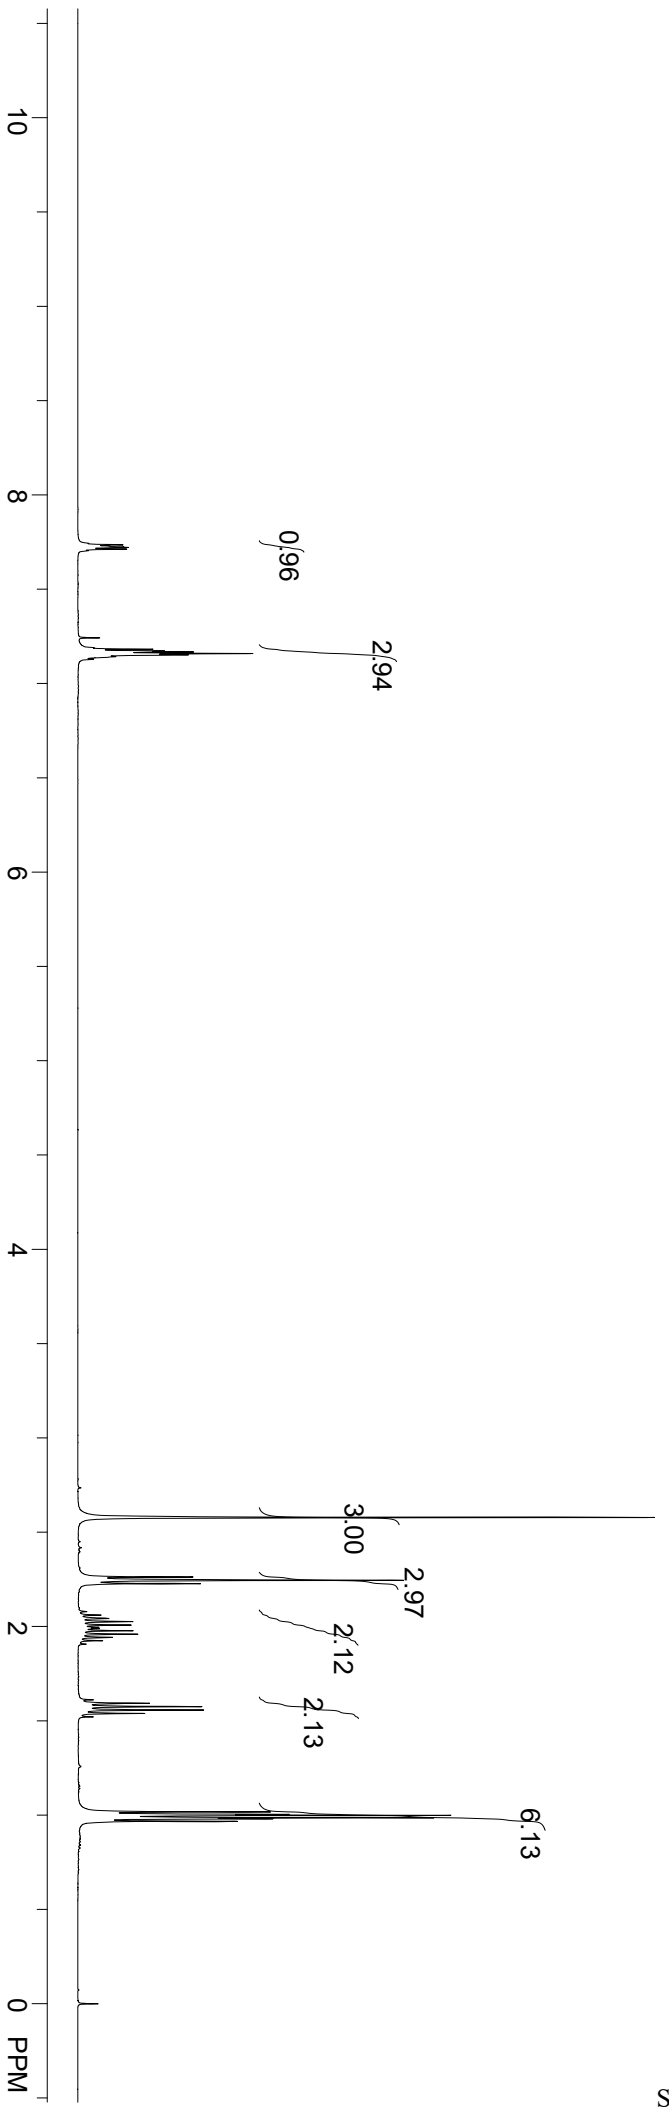

wj-1-122-1-C  
Dec 03 2019  
SOLVENT: CDCl3  
NA = 200  
F1 = 100.612770 MHz  
F2 = 1.000000 MHz

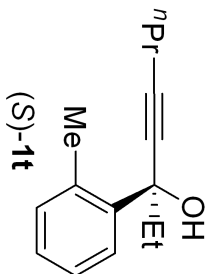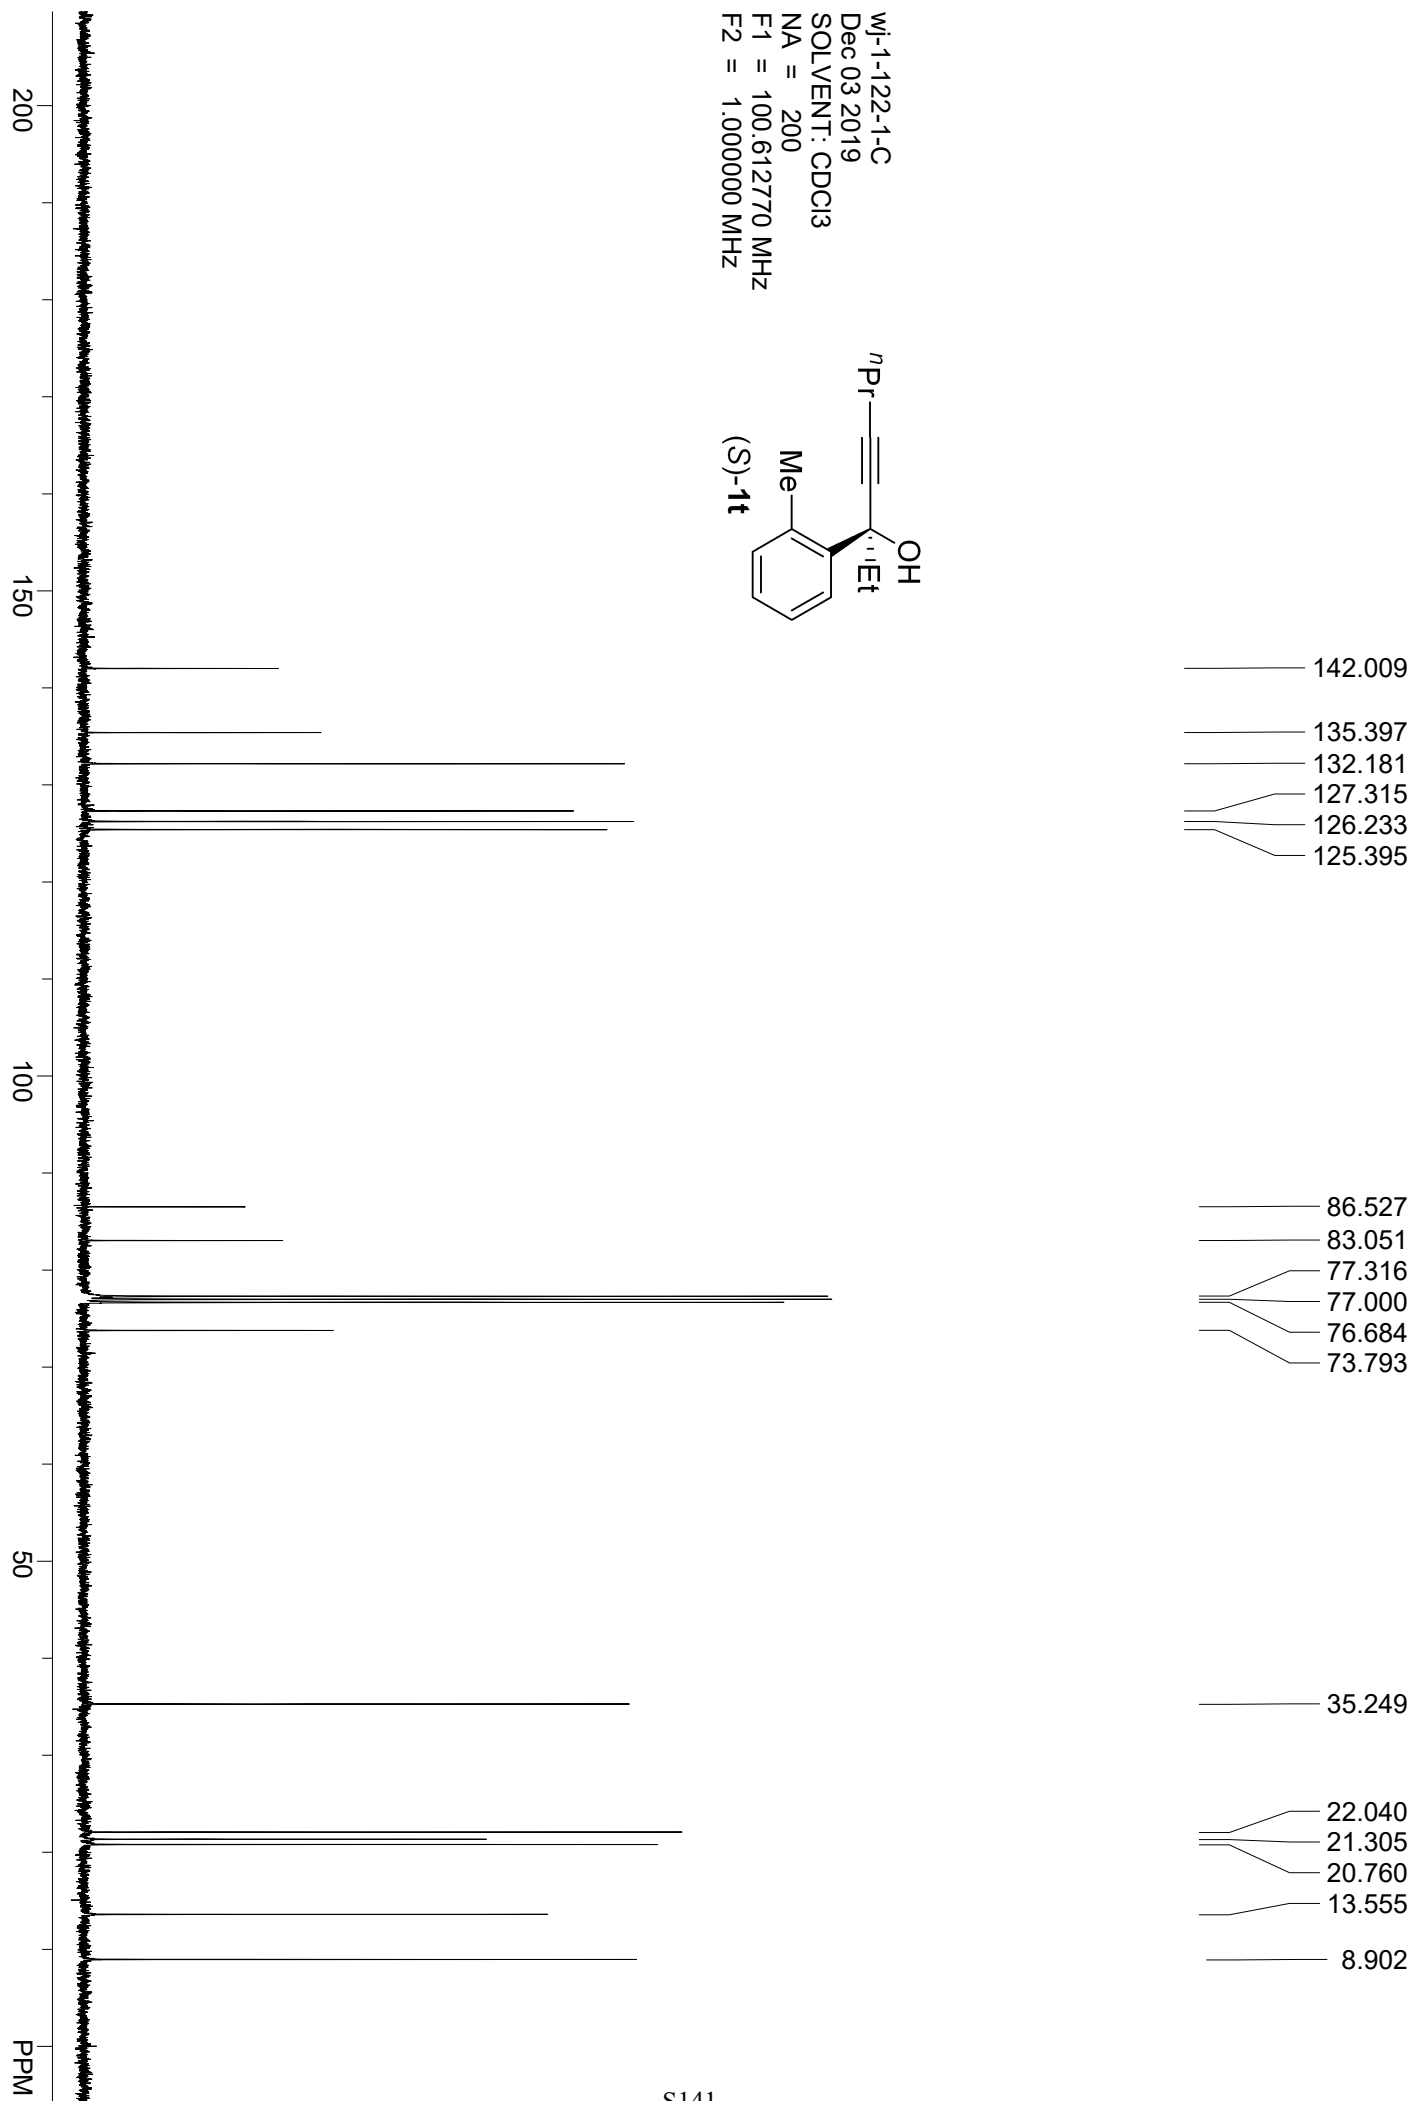

# Area Percent Report



Agilent Technologies

sample wj-1-122-1-AS-H-98-2-1.0-214

Data file: C:\Users\Public\Documents\ChemStation\1\Data\zwf-allenioc acid\_LC 2019-12-03 19-19-43\010-P2-C1-wj-1-122-1.D

## Acquisition Data:

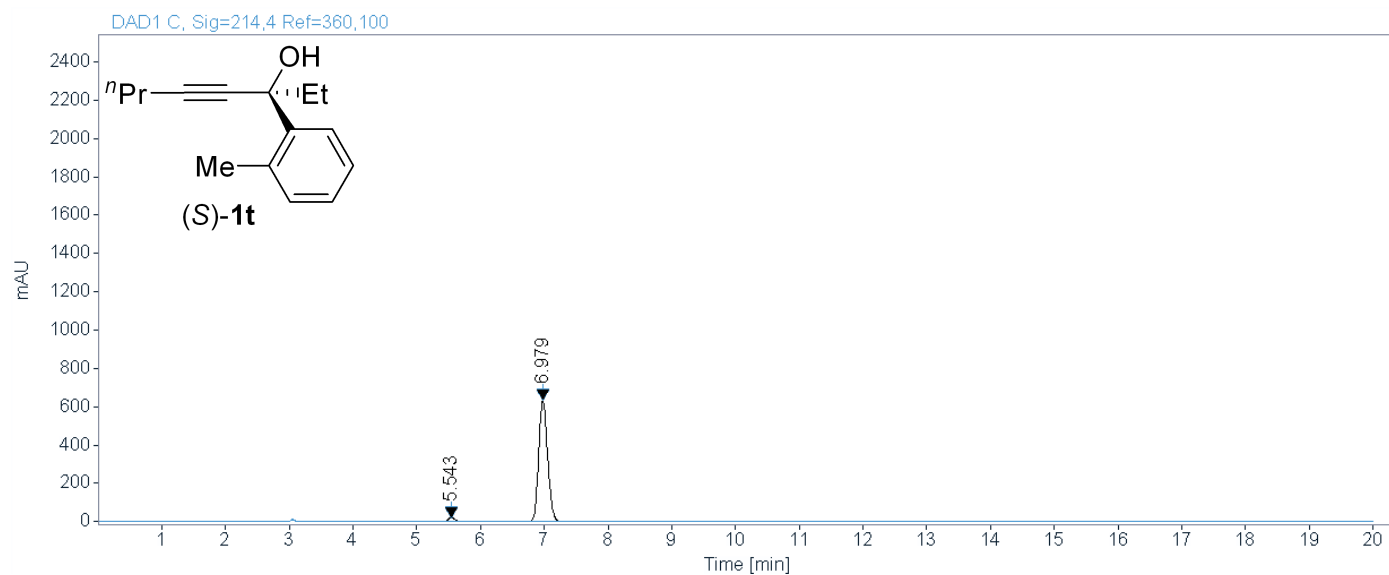

Signal: DAD1 C, Sig=214,4 Ref=360,100

| RT [min] | Width [min] | Height   | Area      | Area%    |
|----------|-------------|----------|-----------|----------|
| 5.543    | 0.1144      | 21.9182  | 162.2364  | 2.5587   |
| 6.979    | 0.1512      | 636.6016 | 6178.2861 | 97.4413  |
| Sum      |             |          | 6340.5225 | 100.0000 |

# Area Percent Report



Agilent Technologies

sample wj-1-122-1-rac-AS-H-98-2-1.0-214

Data file: C:\Users\Public\Documents\ChemStation\1\Data\zwf-allenioc acid\_LC 2019-12-03 19-19-43\011-P2-C2-wj-1-122-1-rac.D

## Acquisition Data:

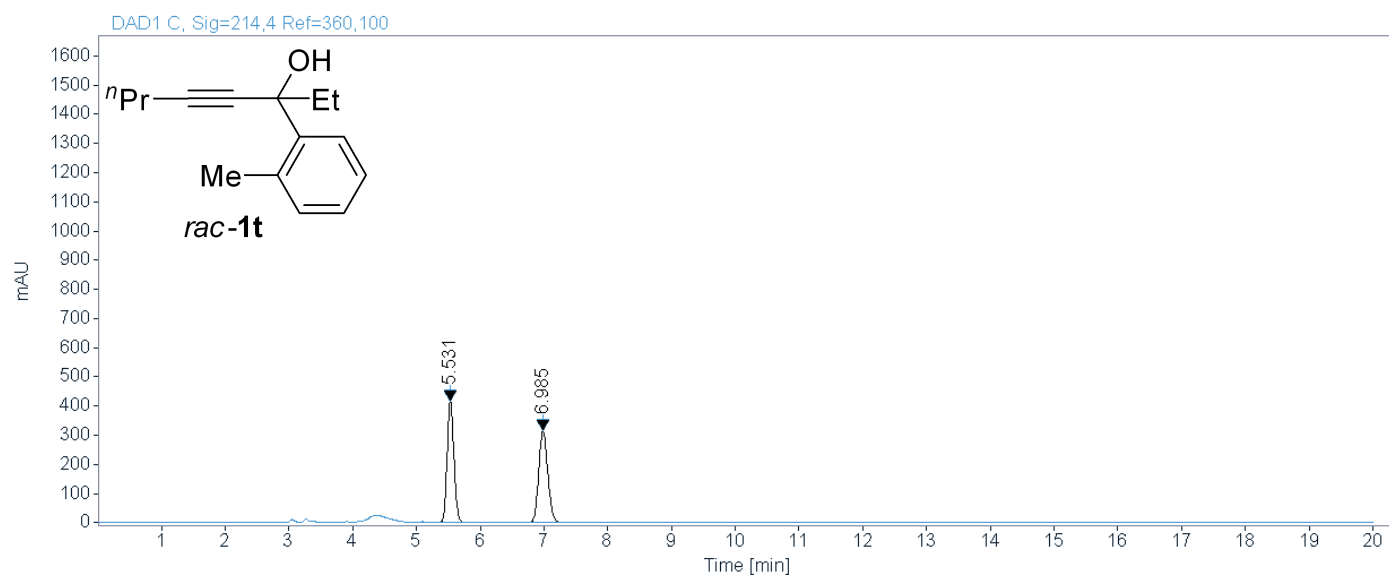

Signal: DAD1 C, Sig=214,4 Ref=360,100

| RT [min] | Width [min] | Height   | Area      | Area%    |
|----------|-------------|----------|-----------|----------|
| 5.531    | 0.1147      | 417.5157 | 3102.4727 | 49.8900  |
| 6.985    | 0.1533      | 315.4018 | 3116.1555 | 50.1100  |
|          |             | Sum      | 6218.6282 | 100.0000 |

wj-1-013-2-H  
Jul 10 2019  
SOLVENT: CDCl3  
NA = 4  
F1 = 400.130005 MHz  
F2 = 1.000000 MHz

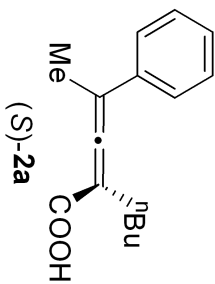

7.389  
7.370  
7.353  
7.335  
7.315  
7.263  
7.245  
7.228

2.342  
2.324  
2.304  
2.188  
1.497  
1.480  
1.461  
1.442  
1.424  
1.389  
1.371  
1.353  
1.334  
1.316  
1.299  
1.258  
0.893  
0.875  
0.857  
0.000

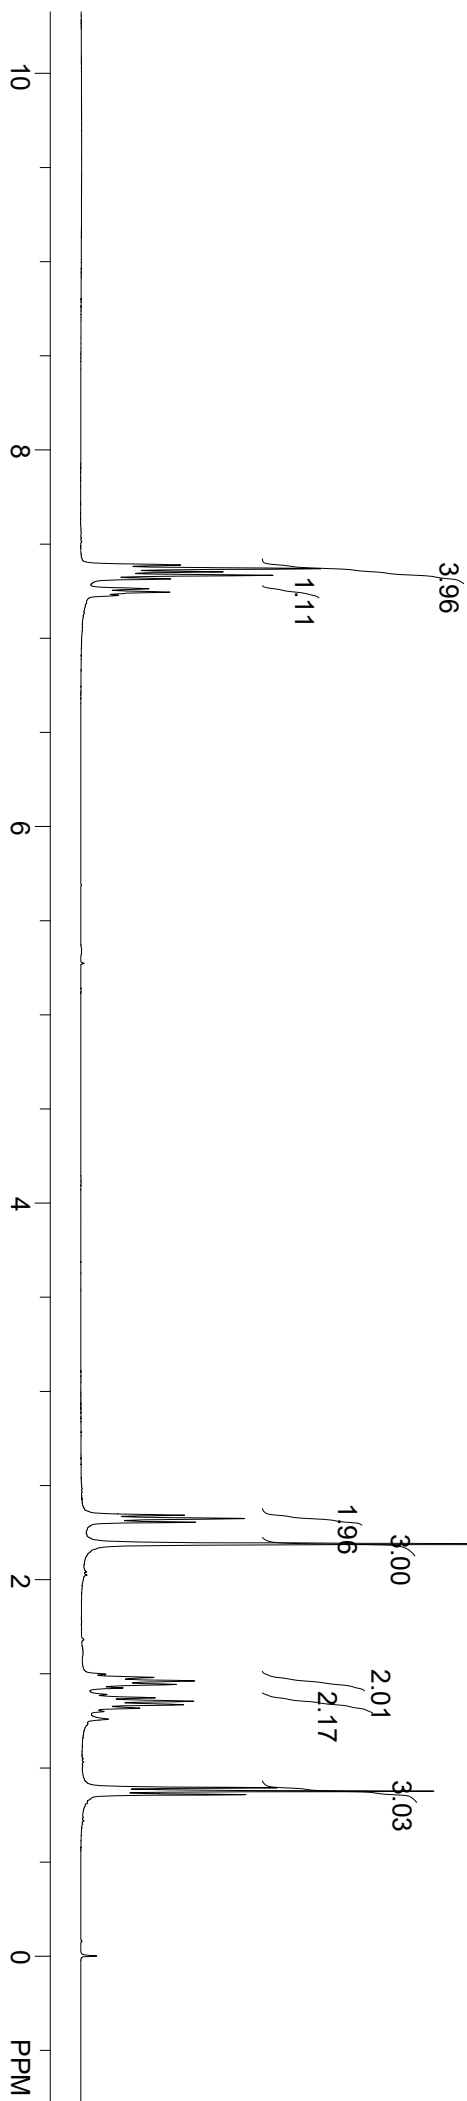



wj-1-013-2-C  
Jul 10 2019  
SOLVENT: CDCl3  
NA = 150  
F1 = 100.612770 MHz  
F2 = 1.000000 MHz

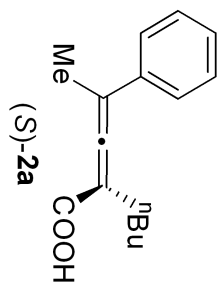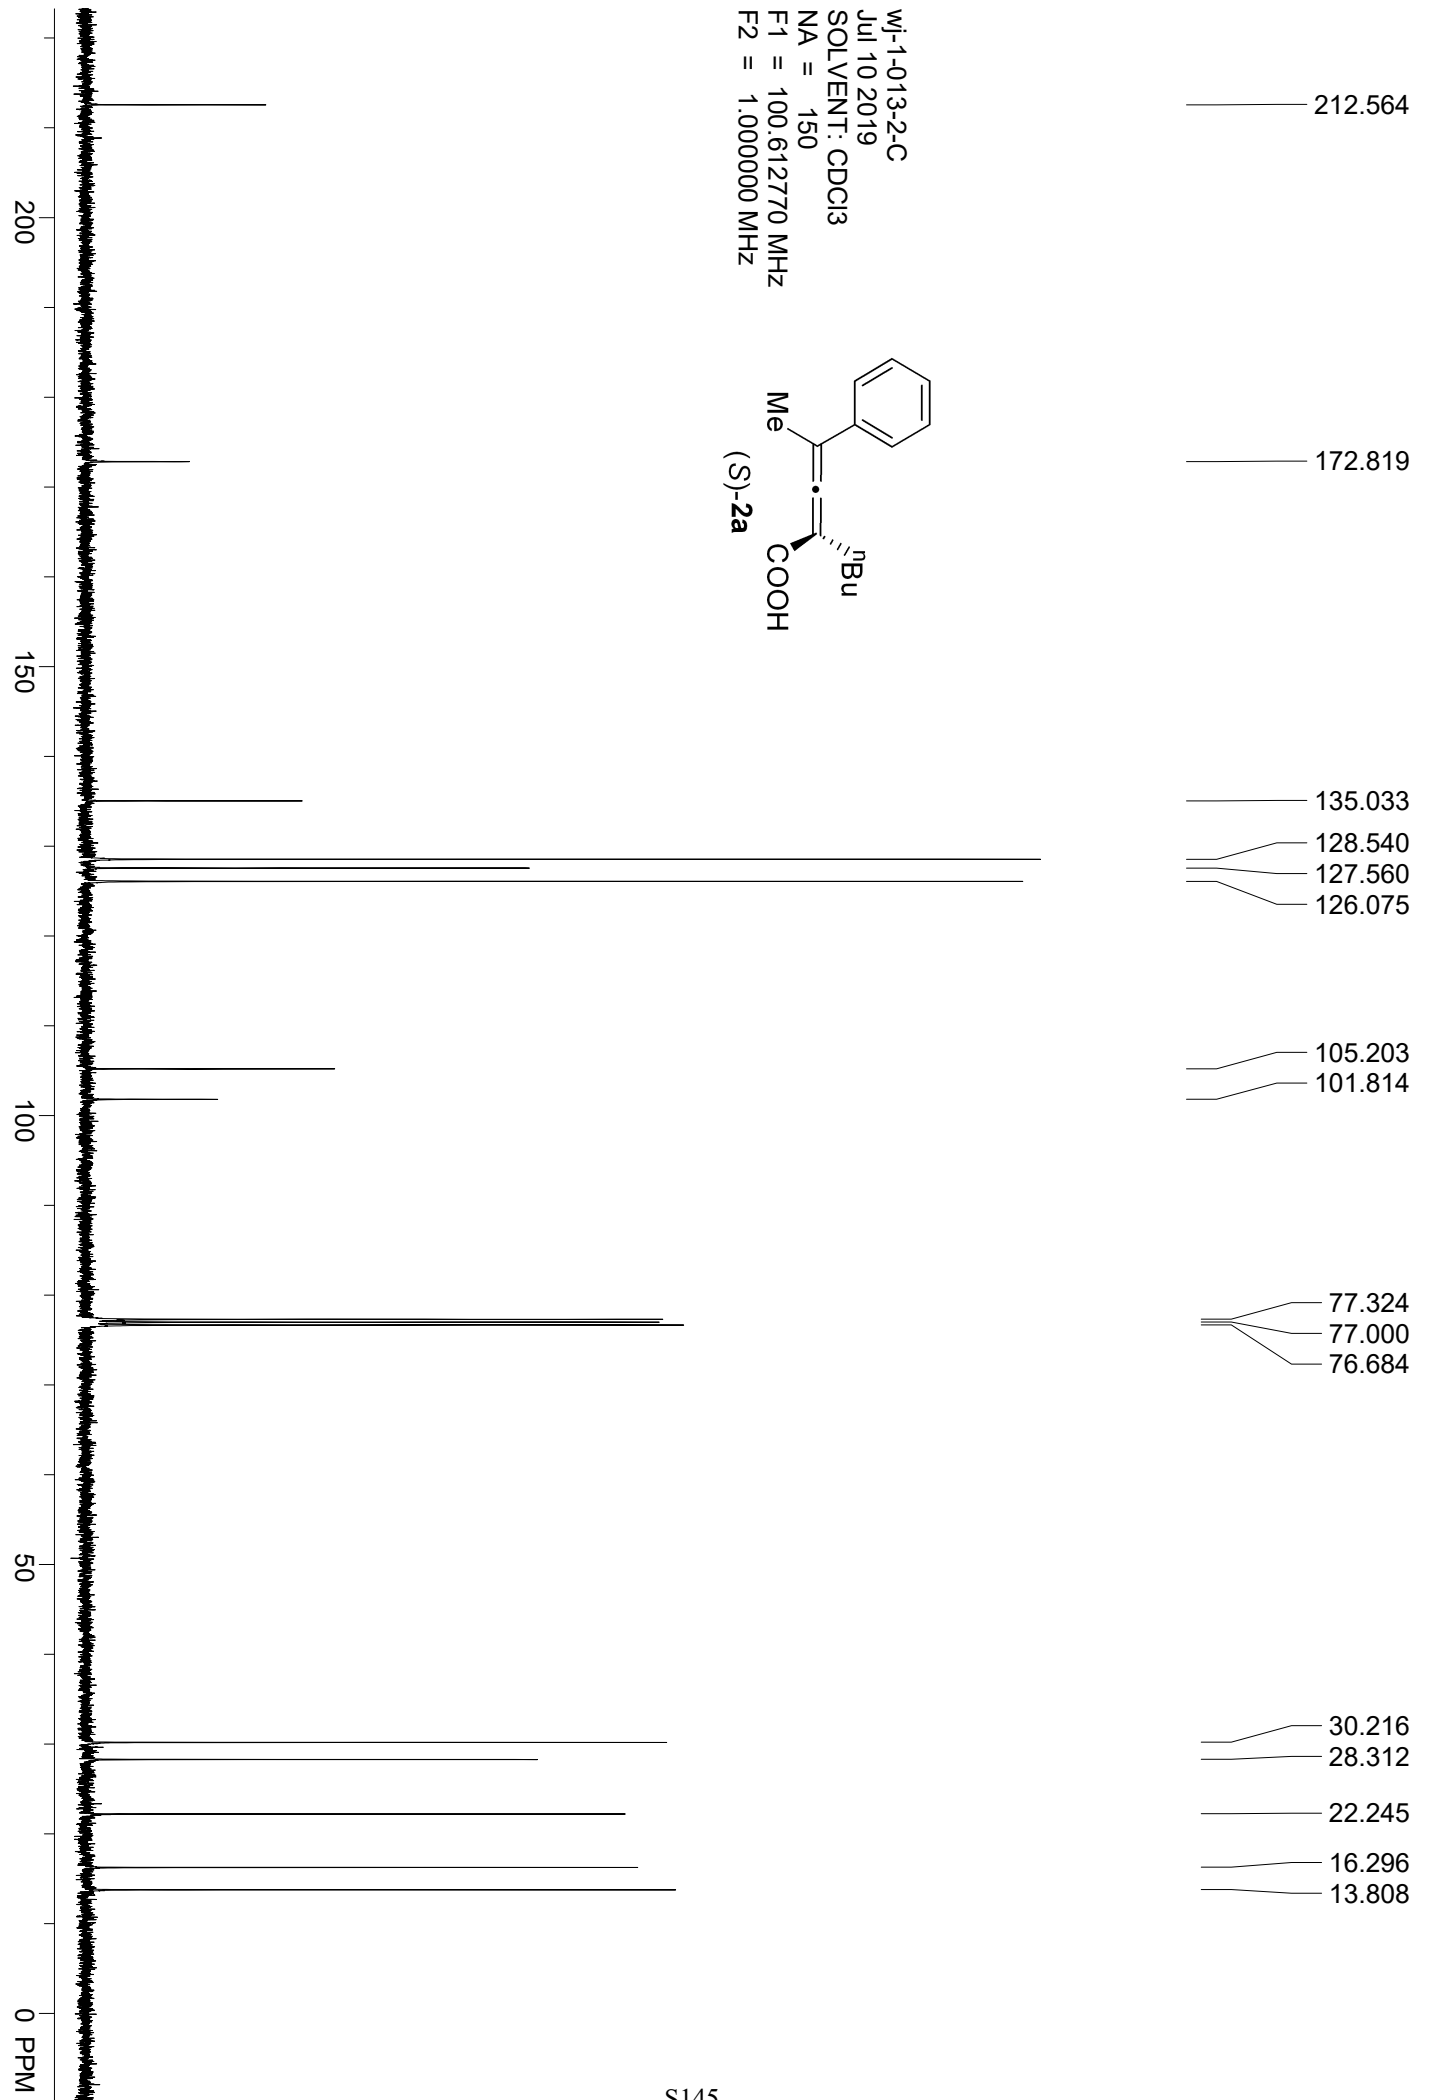

# Area Percent Report



Agilent Technologies

sample wj-1-013-2-AS-H-98-2-1.0-214

Data file: C:\Users\Public\Documents\ChemStation\1\Data\WJ\_LC 2019-07-11 09-14-49\006-P2-C4-wj-1-013-2.D

## Acquisition Data:

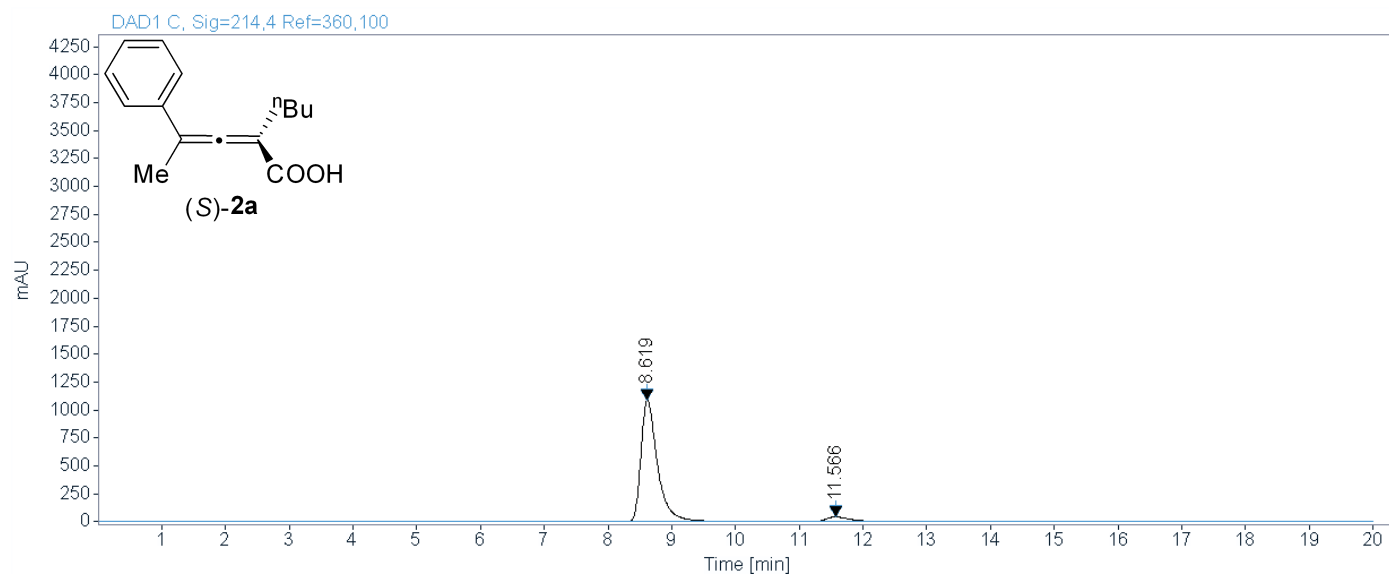

Signal: DAD1 C, Sig=214,4 Ref=360,100

| RT [min] | Width [min] | Height    | Area       | Area%    |
|----------|-------------|-----------|------------|----------|
| 8.619    | 0.2713      | 1090.7281 | 19793.5664 | 95.0068  |
| 11.566   | 0.4164      | 41.6374   | 1040.2765  | 4.9932   |
| Sum      |             |           | 20833.8429 | 100.0000 |

# Area Percent Report



Agilent Technologies

sample wj-1-013-2-rac-AS-H-98-2-1.0-214

Data file: C:\Users\Public\Documents\ChemStation\1\Data\WJ\_LC 2019-07-10 19-09-25\008-P2-C6-wj-1-013-2-rac.D

## Acquisition Data:

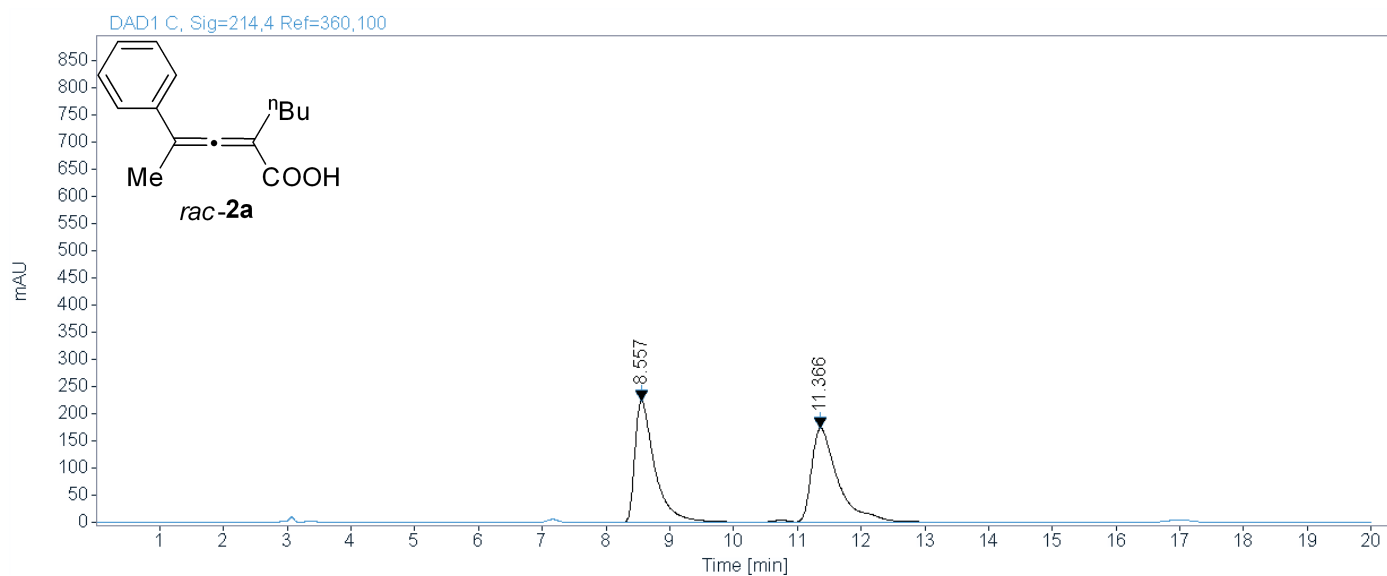

Signal: DAD1 C, Sig=214,4 Ref=360,100

| RT [min] | Width [min] | Height   | Area      | Area%    |
|----------|-------------|----------|-----------|----------|
| 8.557    | 0.3203      | 223.4749 | 4833.5288 | 48.7991  |
| 11.366   | 0.4277      | 173.1143 | 5071.4165 | 51.2009  |
| Sum      |             |          | 9904.9453 | 100.0000 |

wf-1-016-2-H  
Jul 12 2019  
SOLVENT: CDCl3  
NA = 4  
F1 = 400.130005 MHz  
F2 = 1.000000 MHz

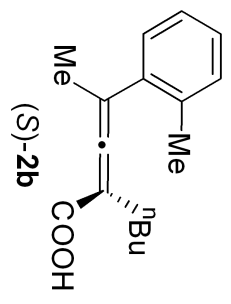

7.263  
7.257  
7.250  
7.187  
7.181  
7.165

2.398  
2.313  
2.295  
2.276  
2.257  
2.236  
2.218  
2.199  
2.180  
2.130  
1.500  
1.483  
1.464  
1.445  
1.426  
1.384  
1.366  
1.348  
1.329  
1.311  
1.293  
1.257  
0.917  
0.898  
0.880  
-0.000

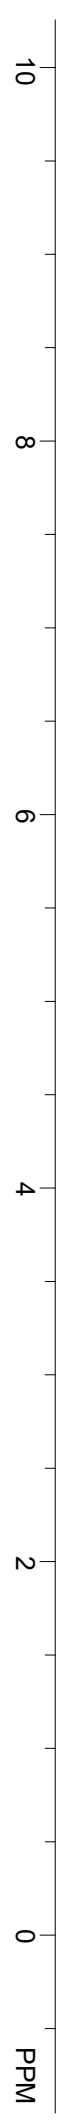

wj-1-016-2-C  
Jul 12 2019  
SOLVENT: CDCl3  
NA = 150  
F1 = 100.612770 MHz  
F2 = 1.000000 MHz

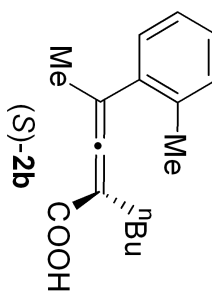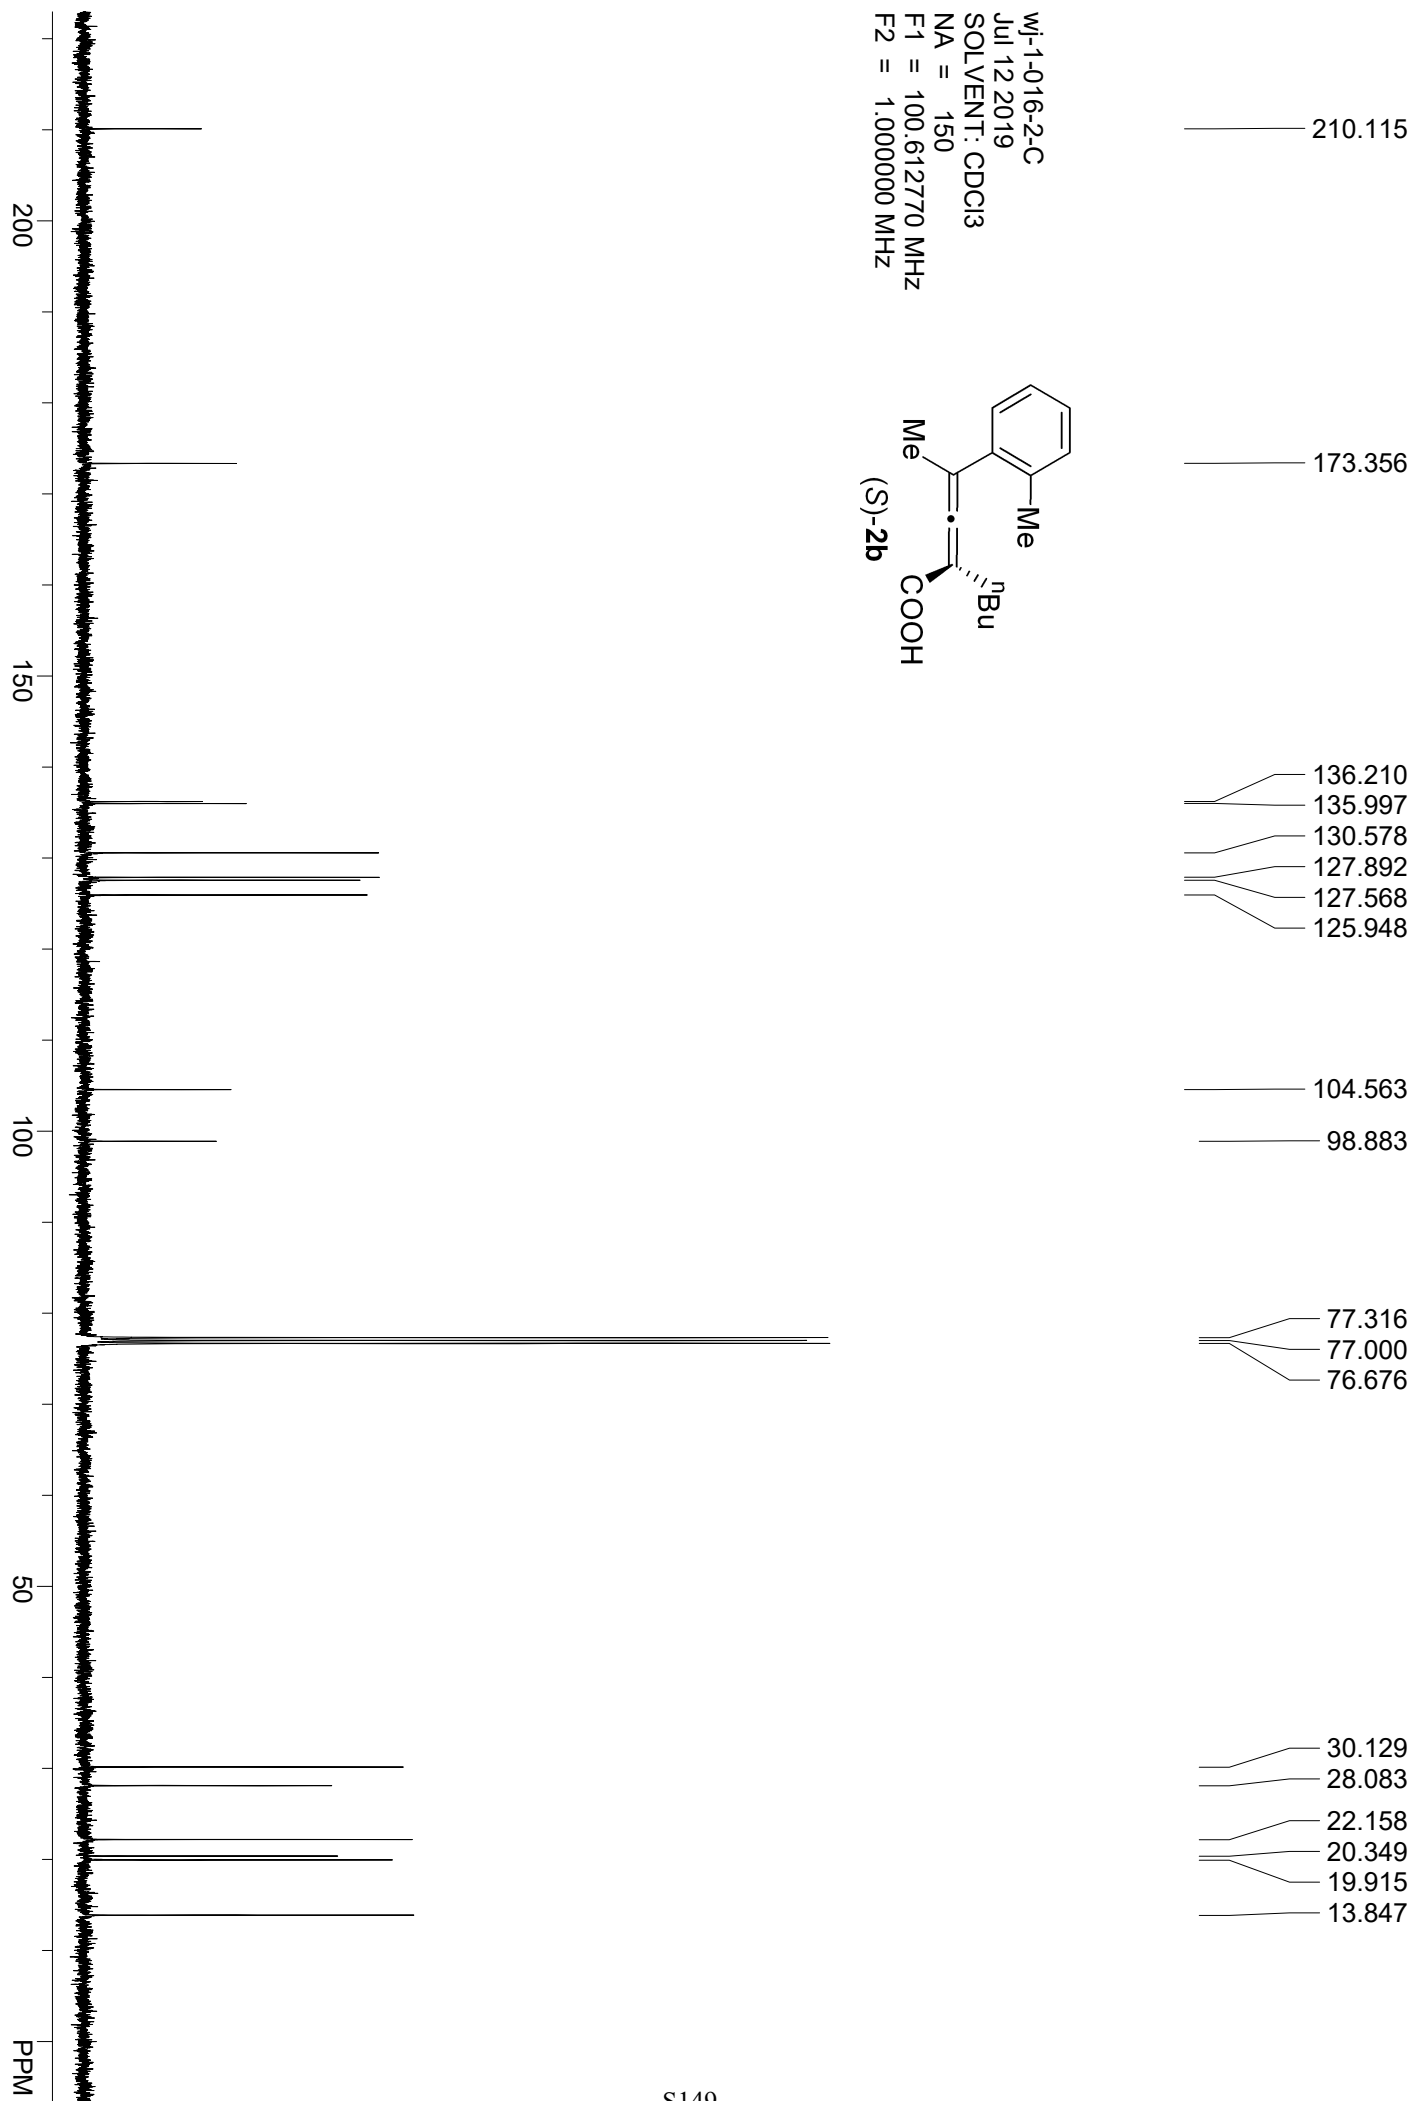

# Area Percent Report



sample wj-1-016-2-AS-H-98-2-1.0-214

Data file: C:\Users\Public\Documents\ChemStation\1\Data\WJ\_LC 2019-07-12 22-04-29\009-P2-C7-wj-1-016-2.D

## Acquisition Data:

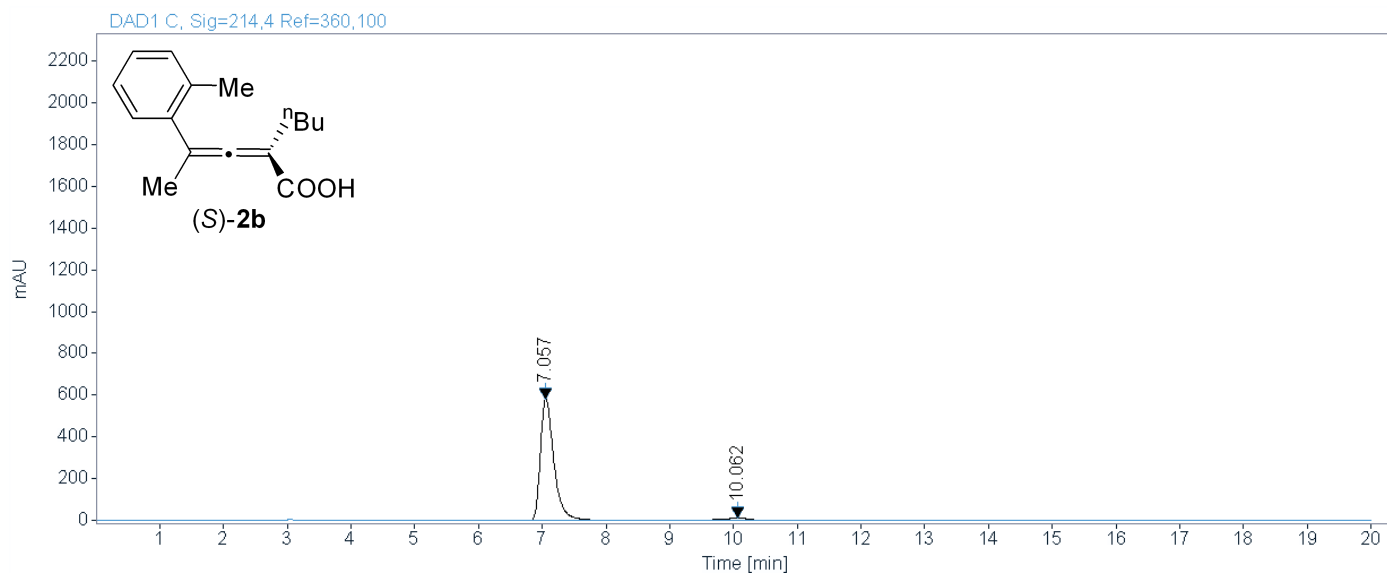

Signal: DAD1 C, Sig=214,4 Ref=360,100

| RT [min] | Width [min] | Height   | Area      | Area%    |
|----------|-------------|----------|-----------|----------|
| 7.057    | 0.2239      | 582.6659 | 8584.3232 | 95.9713  |
| 10.062   | 0.4107      | 12.6379  | 360.3499  | 4.0287   |
|          |             | Sum      | 8944.6731 | 100.0000 |

# Area Percent Report

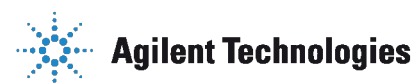

sample wj-1-016-2-rac-AS-H-98-2-1.0-214

Data file: C:\Users\Public\Documents\ChemStation\1\Data\WJ\_LC 2019-07-12 22-04-29\010-P2-C8-wj-1-016-2-rac.D

## Acquisition Data:

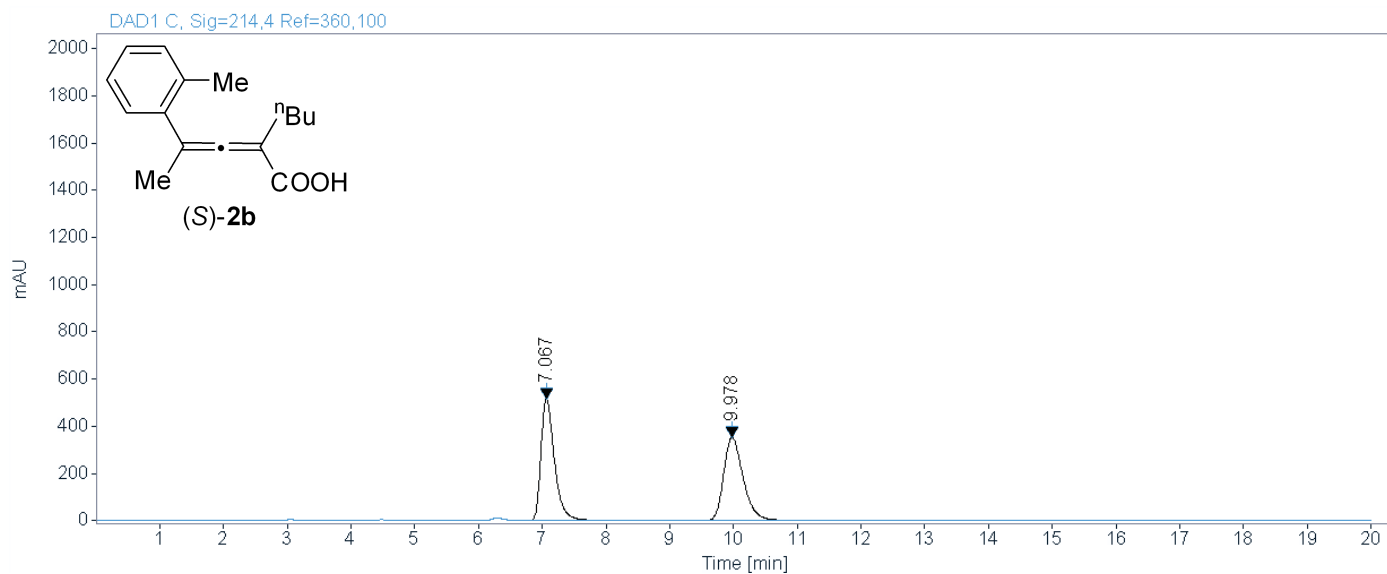

Signal: DAD1 C, Sig=214,4 Ref=360,100

| RT [min] | Width [min] | Height   | Area       | Area%    |
|----------|-------------|----------|------------|----------|
| 7.067    | 0.2220      | 514.9291 | 7503.5029  | 49.8546  |
| 9.978    | 0.3301      | 352.0159 | 7547.2827  | 50.1454  |
|          | Sum         |          | 15050.7856 | 100.0000 |

wj-1-019-2-H  
Jul 16 2019  
SOLVENT: CDCl3  
NA = 4  
F1 = 400.130005 MHz  
F2 = 1.000000 MHz

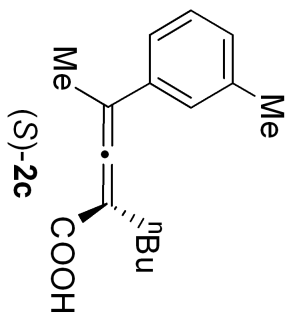

7.246  
7.227  
7.208  
7.181  
7.072  
7.054

2.347  
2.322  
2.303  
2.175  
1.496  
1.478  
1.459  
1.441  
1.422  
1.392  
1.374  
1.356  
1.337  
1.319  
1.301  
1.254  
0.896  
0.878  
0.860  
-0.000

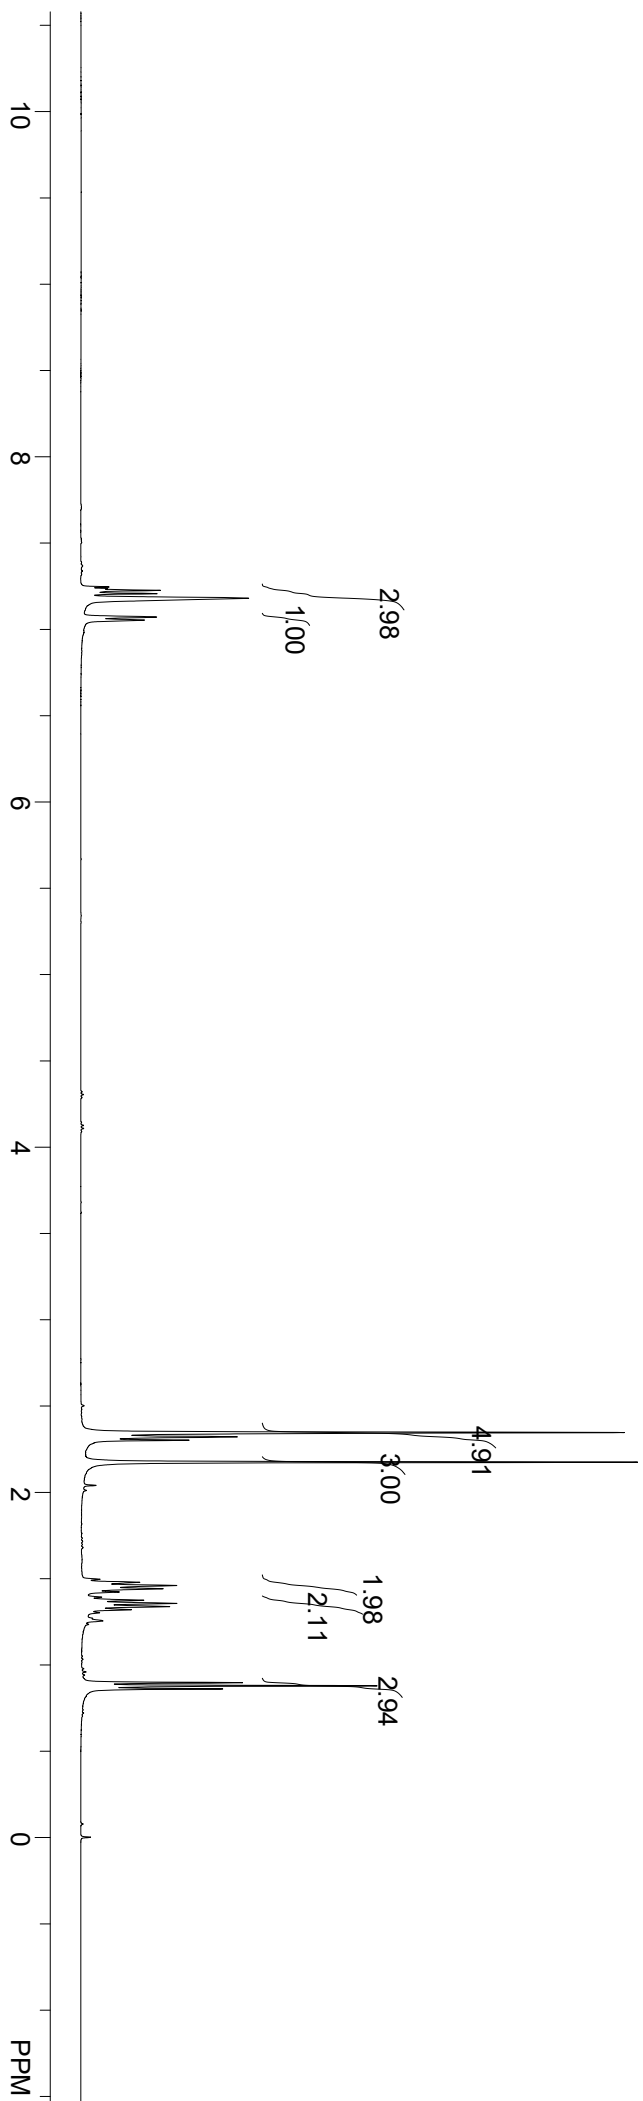



wj-1-019-2-C  
Jul 16 2019  
SOLVENT: CDCl3  
NA = 150  
F1 = 100.612770 MHz  
F2 = 1.000000 MHz

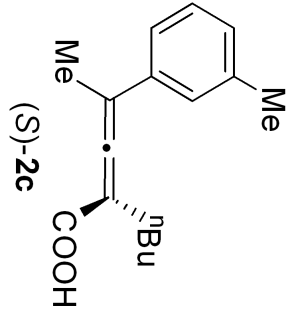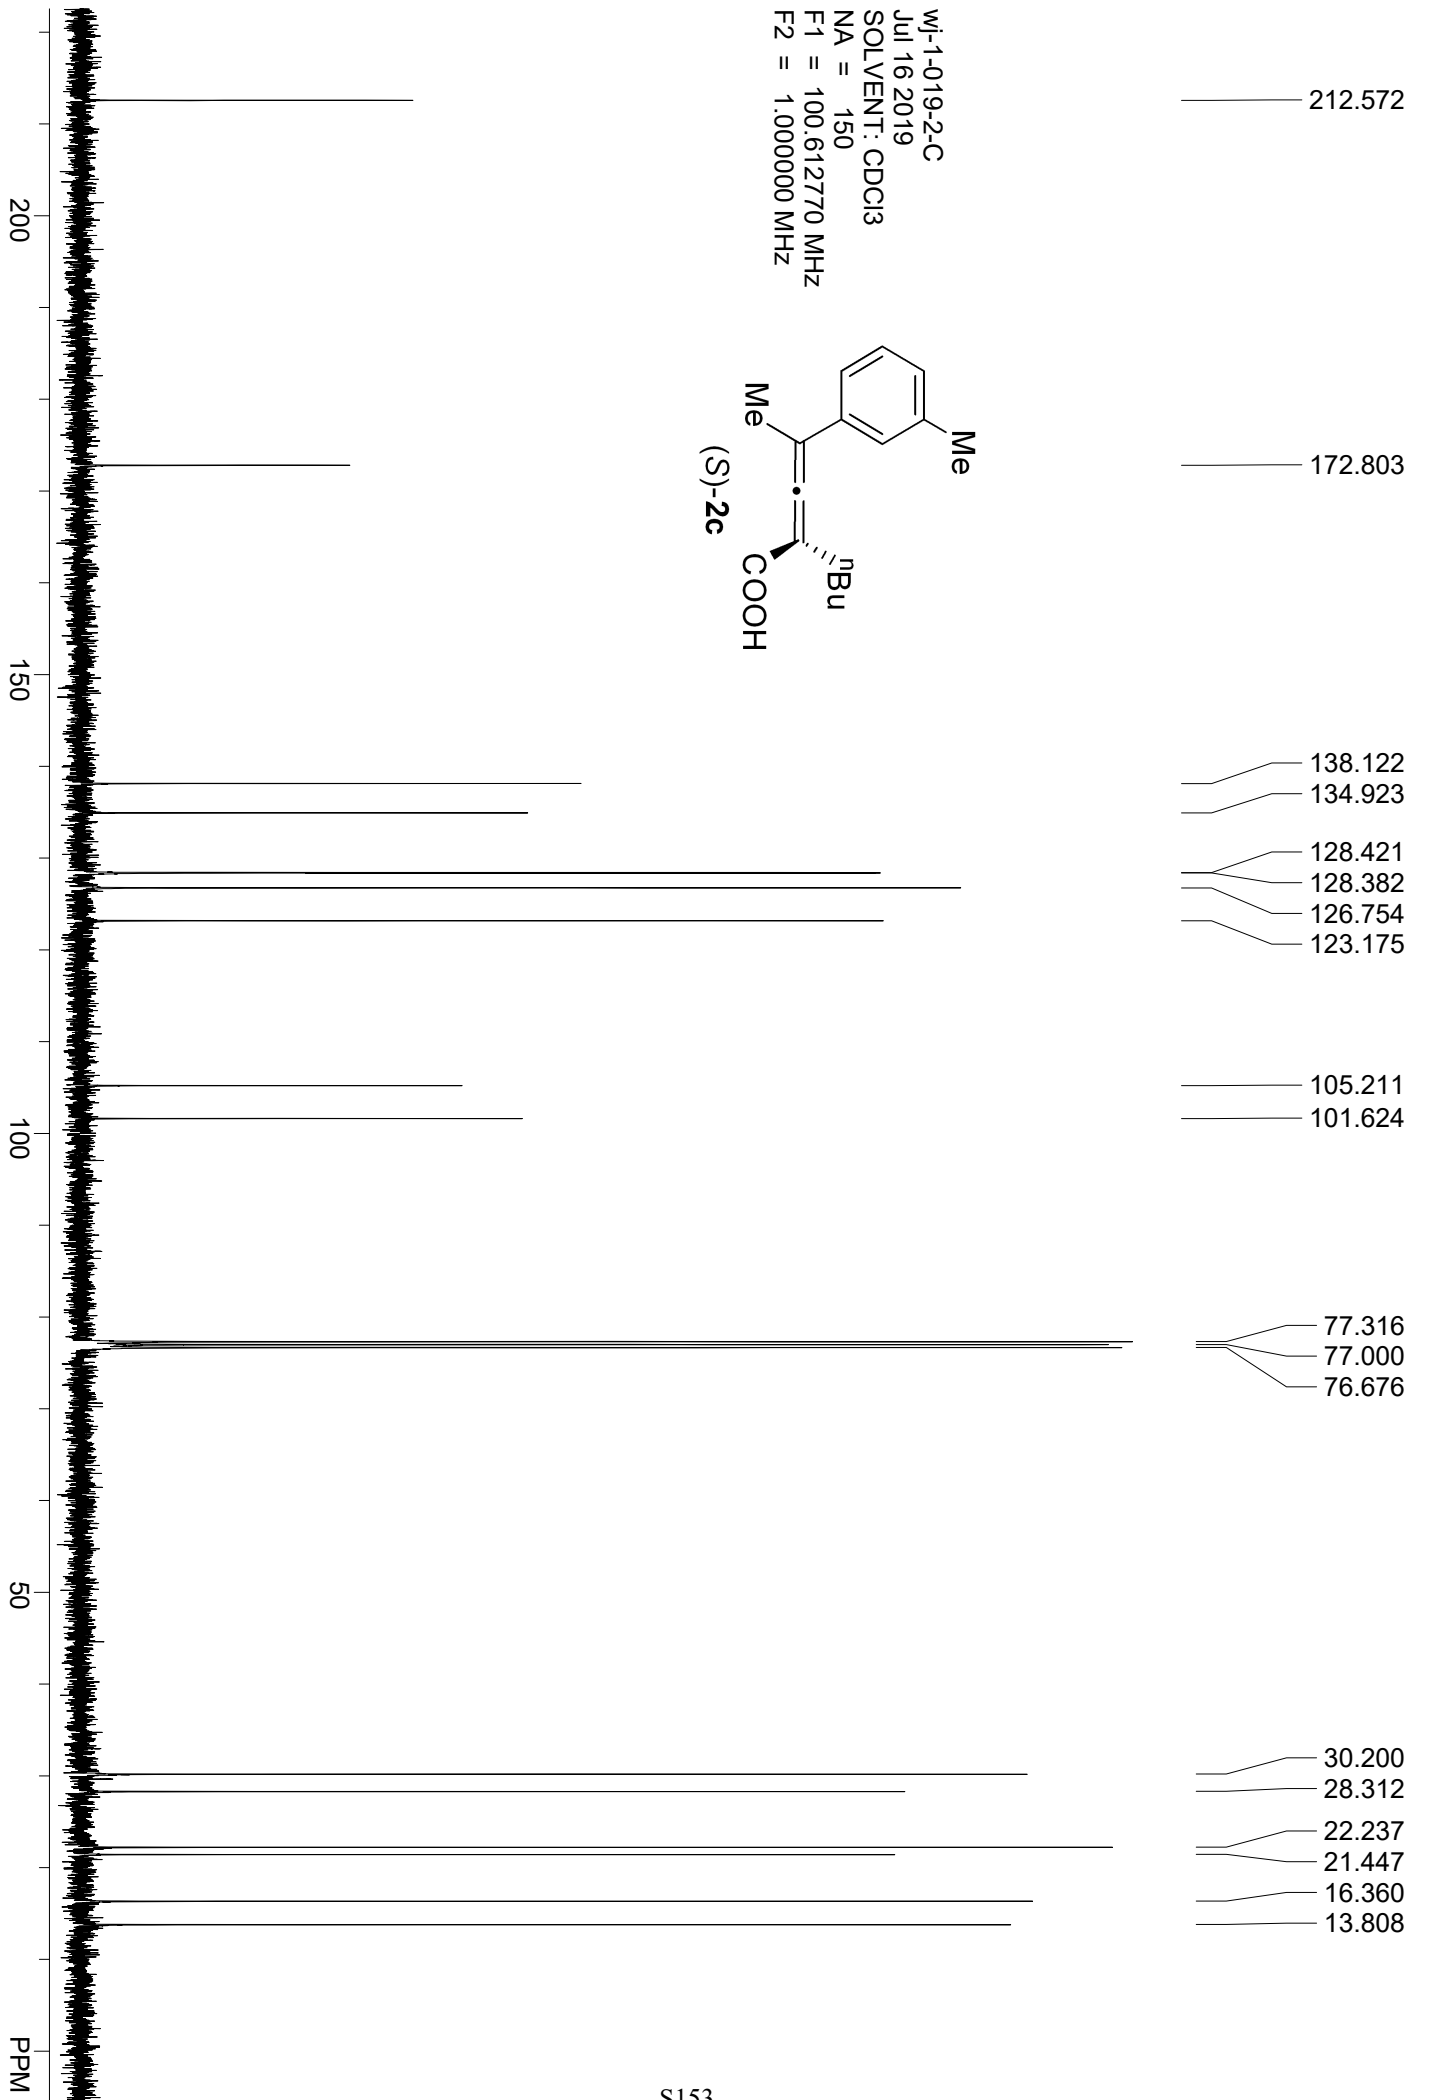

# Area Percent Report



sample wj-1-019-2-AS-H-98-2-1.0-214

Data file: C:\Users\Public\Documents\ChemStation\1\Data\zwf-allenioc acid\_LC 2019-07-15 22-12-25\005-P2-C3-wj-1-019-2.D

## Acquisition Data:

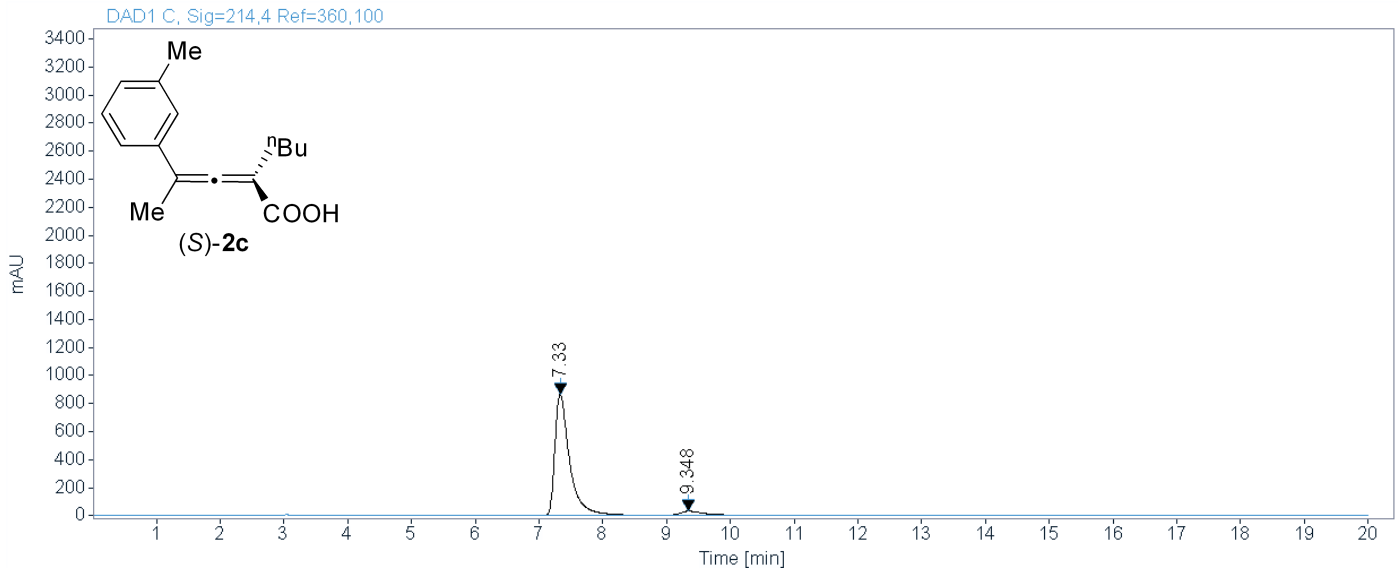

Signal: DAD1 C, Sig=214,4 Ref=360,100

| RT [min] | Width [min] | Height   | Area       | Area%    |
|----------|-------------|----------|------------|----------|
| 7.330    | 0.2404      | 868.6541 | 14024.9150 | 95.6821  |
| 9.348    | 0.3852      | 27.3880  | 632.9089   | 4.3179   |
| Sum      |             |          | 14657.8240 | 100.0000 |

# Area Percent Report



Agilent Technologies

sample wj-1-019-2-rac-AS-H-98-  
2-1.0-214

Data file: C:\Users\Public\Documents\ChemStation\1\Data\zwf-allenioc acid\_LC 2019-07-15 22-12-25\006-P2-  
C4-wj-1-019-2-rac.D

## Acquisition Data:

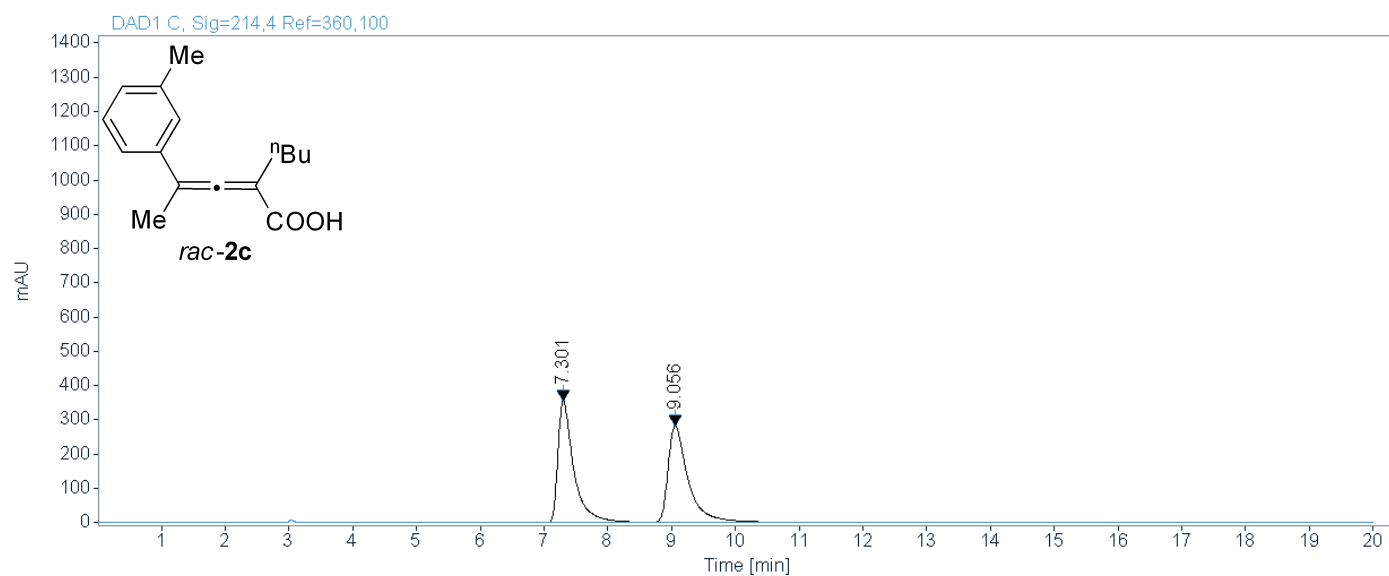

Signal: DAD1 C, Sig=214,4 Ref=360,100

| RT [min] | Width [min] | Height   | Area       | Area%    |
|----------|-------------|----------|------------|----------|
| 7.301    | 0.2540      | 355.2681 | 6151.0254  | 49.7808  |
| 9.056    | 0.3249      | 281.8253 | 6205.1973  | 50.2192  |
|          | Sum         |          | 12356.2227 | 100.0000 |

wj-1-022-2-H  
Jul 17 2019  
SOLVENT: CDCl3  
NA = 4  
F1 = 400.130005 MHz  
F2 = 1.000000 MHz

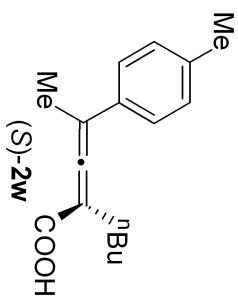

7.275  
7.255  
7.153  
7.134

2.338  
2.314  
2.295  
2.169  
1.489  
1.471  
1.452  
1.433  
1.415  
1.386  
1.368  
1.349  
1.330  
1.312  
1.295  
1.257  
0.891  
0.873  
0.855  
0.000

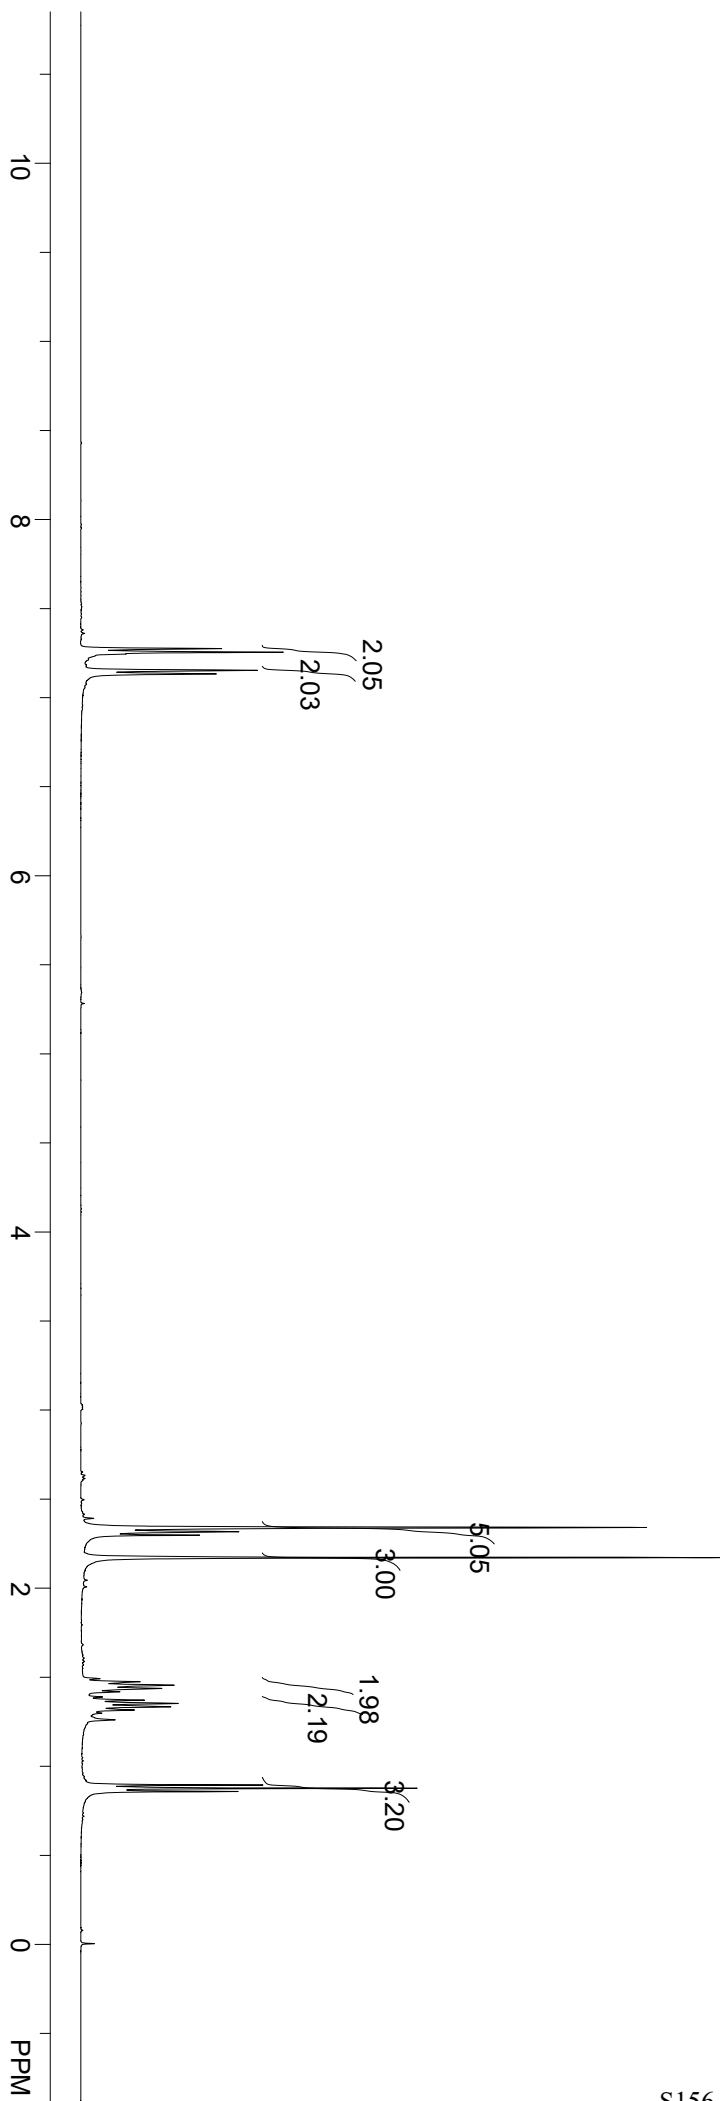

wj-1-022-2-C  
Jul 17 2019  
SOLVENT: CDCl3  
NA = 150  
F1 = 100.612770 MHz  
F2 = 1.000000 MHz

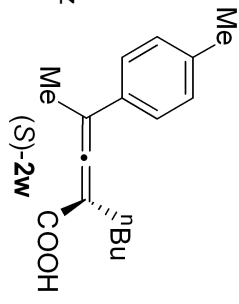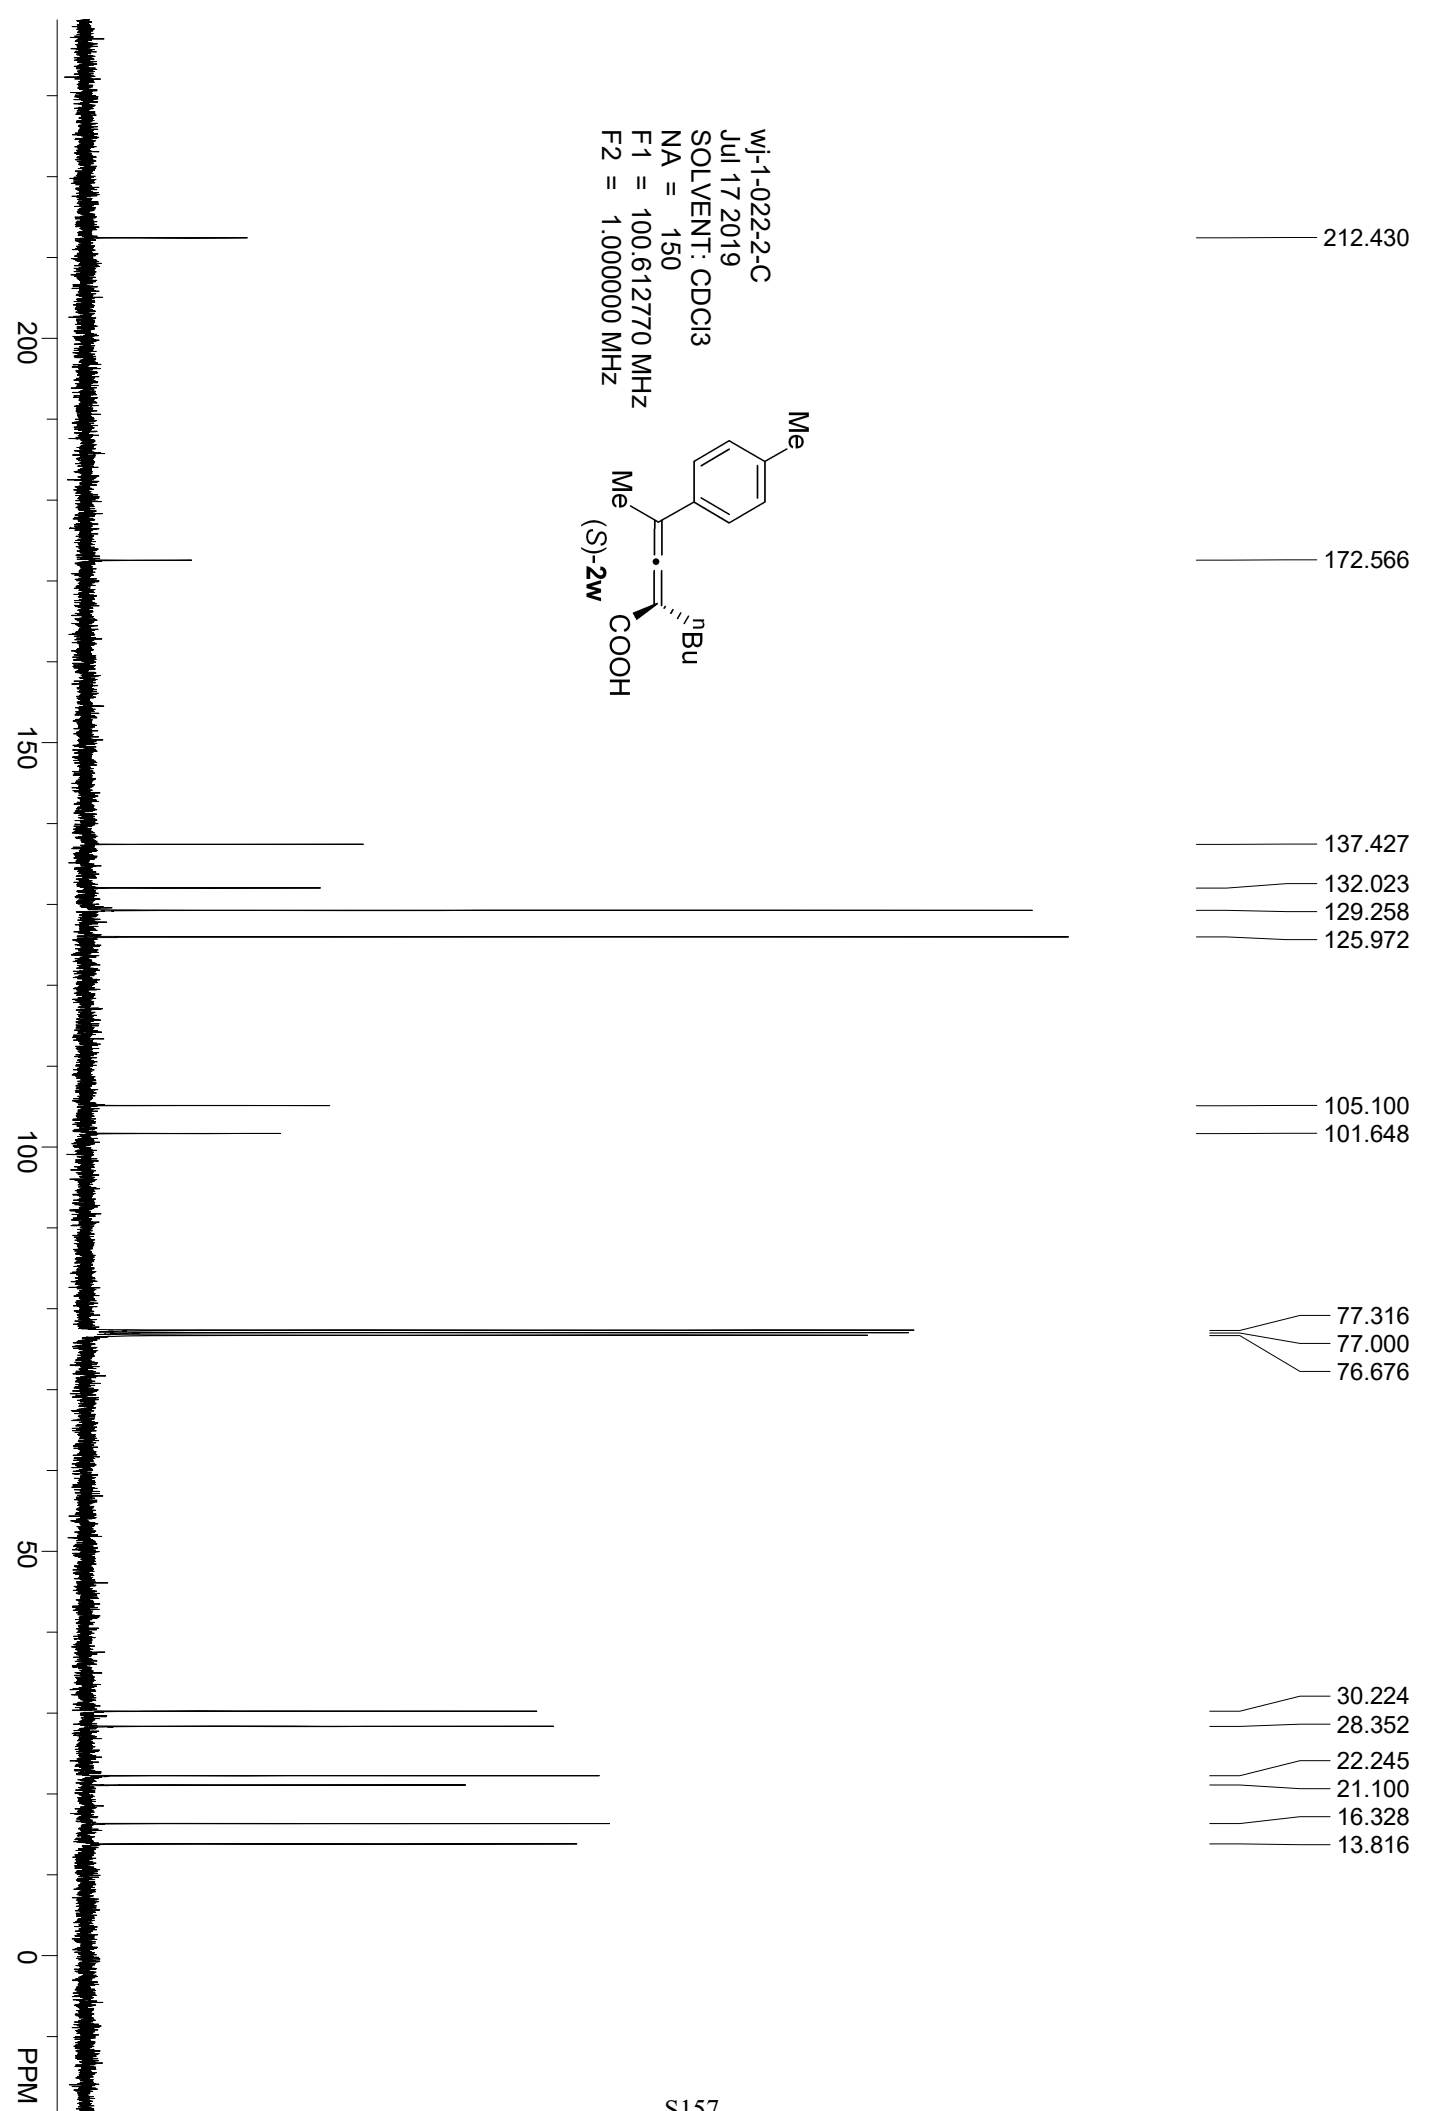

# Area Percent Report



sample wj-1-022-2-AS-H-98-2-1.0-214

Data file: C:\Users\Public\Documents\ChemStation\1\Data\WJ\_LC 2019-07-18 08-40-27\005-P2-C3-wj-1-022-2.D

## Acquisition Data:

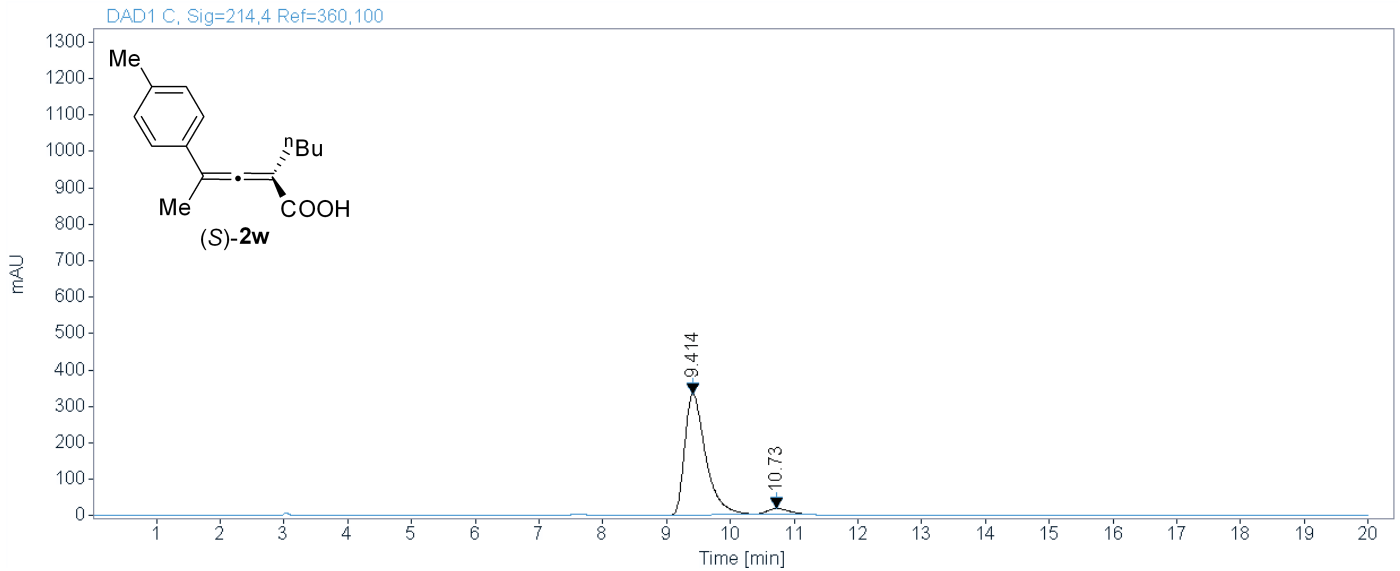

Signal: DAD1 C, Sig=214,4 Ref=360,100

| RT [min] | Width [min] | Height   | Area      | Area%    |
|----------|-------------|----------|-----------|----------|
| 9.414    | 0.3818      | 333.5311 | 7639.8374 | 95.3541  |
| 10.730   | 0.4053      | 15.3062  | 372.2325  | 4.6459   |
|          | Sum         |          | 8012.0699 | 100.0000 |

# Area Percent Report



Agilent Technologies

sample wj-1-022-2-rac-AS-H-98-2-1.0-214

Data file: C:\Users\Public\Documents\ChemStation\1\Data\WJ\_LC 2019-07-18 08-40-27\006-P2-C4-wj-1-022-2-rac.D

## Acquisition Data:

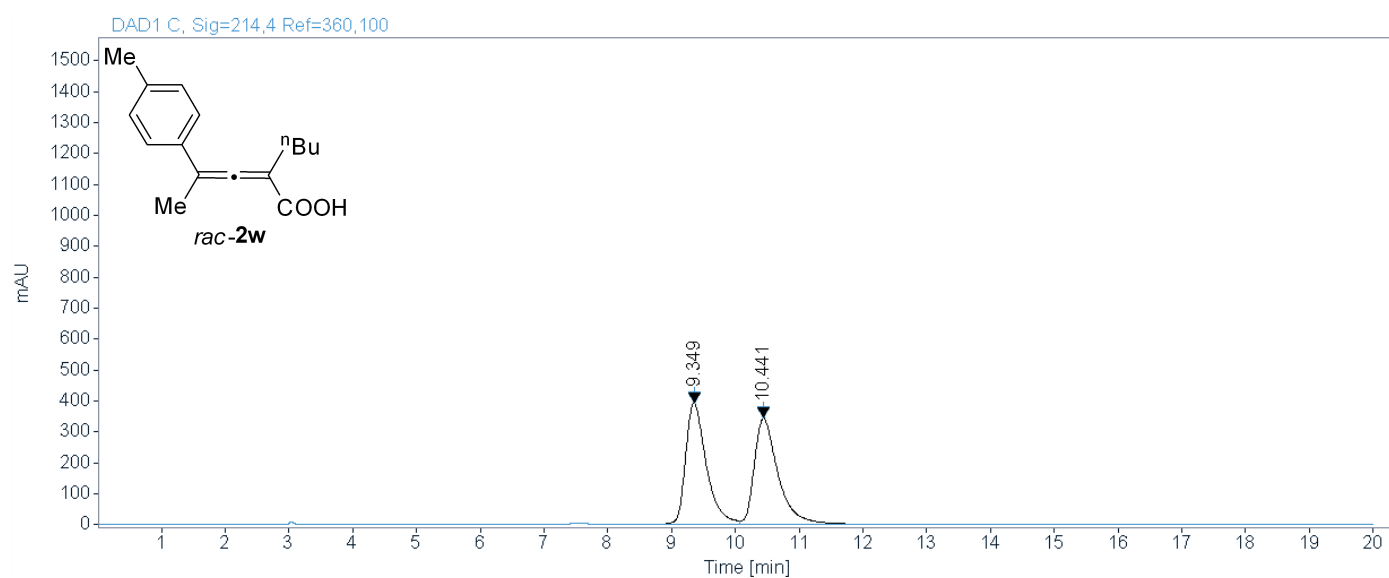

Signal: DAD1 C, Sig=214,4 Ref=360,100

| RT [min] | Width [min] | Height   | Area       | Area%    |
|----------|-------------|----------|------------|----------|
| 9.349    | 0.3457      | 393.8154 | 8968.2070  | 49.6367  |
| 10.441   | 0.3968      | 343.7471 | 9099.5010  | 50.3633  |
|          | Sum         |          | 18067.7080 | 100.0000 |

wj-1-030-2-H  
Jul 23 2019  
SOLVENT: CDCl3  
NA = 4  
F1 = 400.130005 MHz  
F2 = 1.000000 MHz

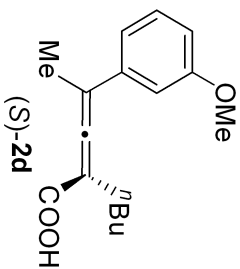

7.276  
7.256  
7.236  
6.991  
6.971  
6.923  
6.817  
6.797

3.804

2.340  
2.322  
2.302  
2.176

1.500  
1.482  
1.463  
1.445  
1.426  
1.393  
1.376  
1.357  
1.339  
1.321  
1.303  
0.896  
0.878  
0.860  
0.000

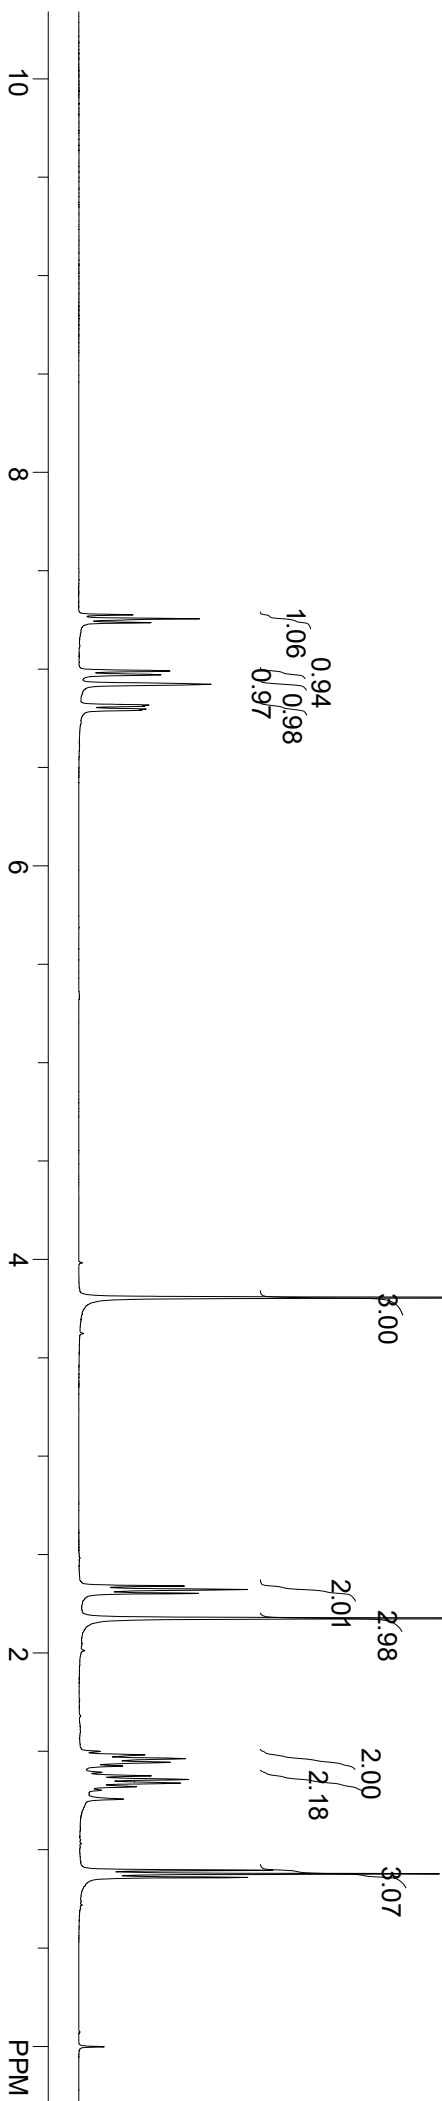



212.556

172.503

159.776

136.574

129.480

118.649

112.866

112.036

105.156

101.774

77.316

77.000

76.684

55.228

30.240

28.312

22.253

16.360

13.808

WJ-1-030-2-C  
Jul 23 2019  
SOLVENT: CDCl3  
NA = 150  
F1 = 100.612770 MHz  
F2 = 1.000000 MHz

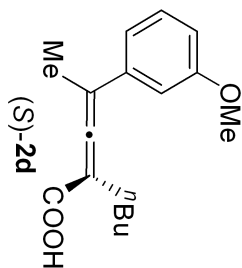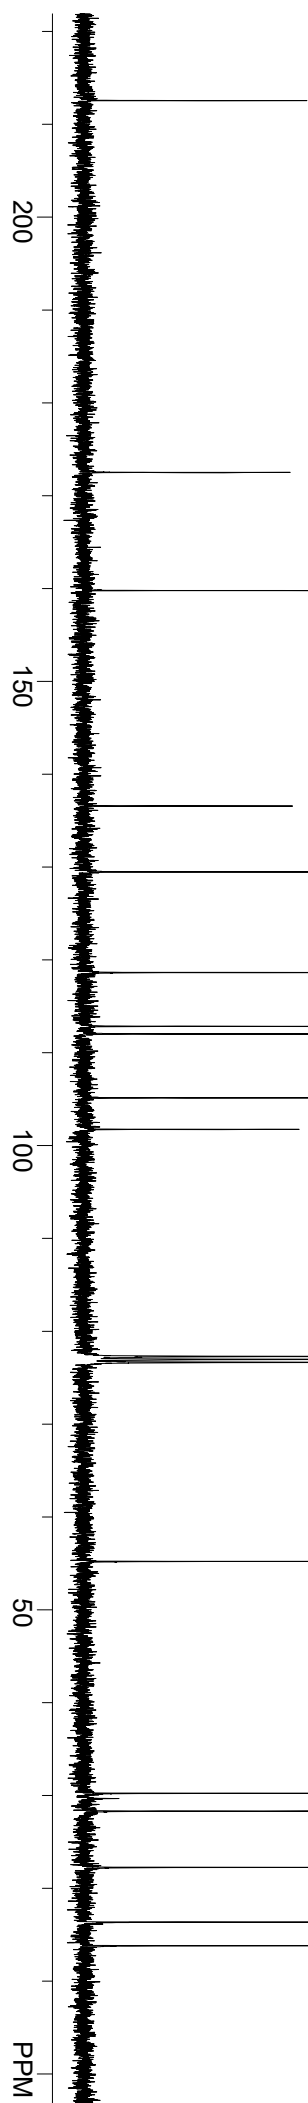

# Area Percent Report



Agilent Technologies

sample wj-1-030-2-AS-H-98-2-1.0-214

Data file: C:\Users\Public\Documents\ChemStation\1\Data\WJ\_LC 2019-07-23 14-03-17\041-P2-C3-wj-1-030-2.D

## Acquisition Data:

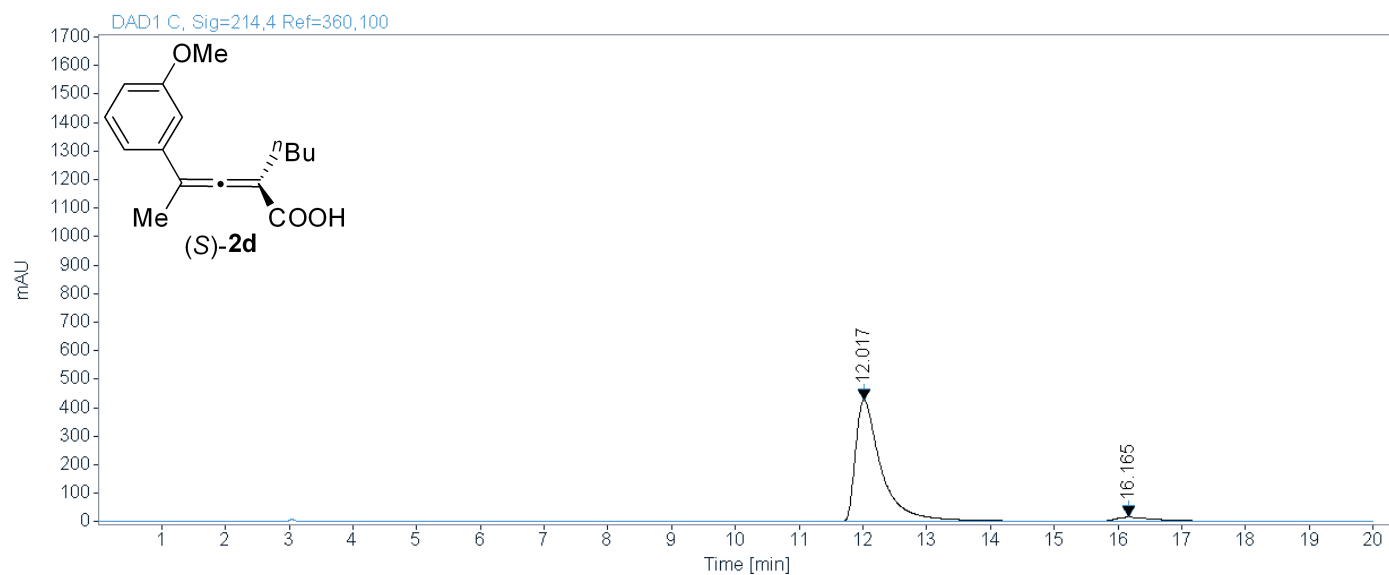

Signal: DAD1 C, Sig=214,4 Ref=360,100

| RT [min] | Width [min] | Height   | Area       | Area%    |
|----------|-------------|----------|------------|----------|
| 12.017   | 0.4208      | 427.2359 | 12259.2998 | 95.2932  |
| 16.165   | 0.6995      | 14.4275  | 605.5215   | 4.7068   |
| Sum      |             |          | 12864.8213 | 100.0000 |

# Area Percent Report



Agilent Technologies

sample wj-1-030-2-rac-AS-H-98-2-1.0-214

Data file: C:\Users\Public\Documents\ChemStation\1\Data\WJ\_LC 2019-07-23 14-03-17\042-P2-C4-wj-1-030-2-rac.D

## Acquisition Data:

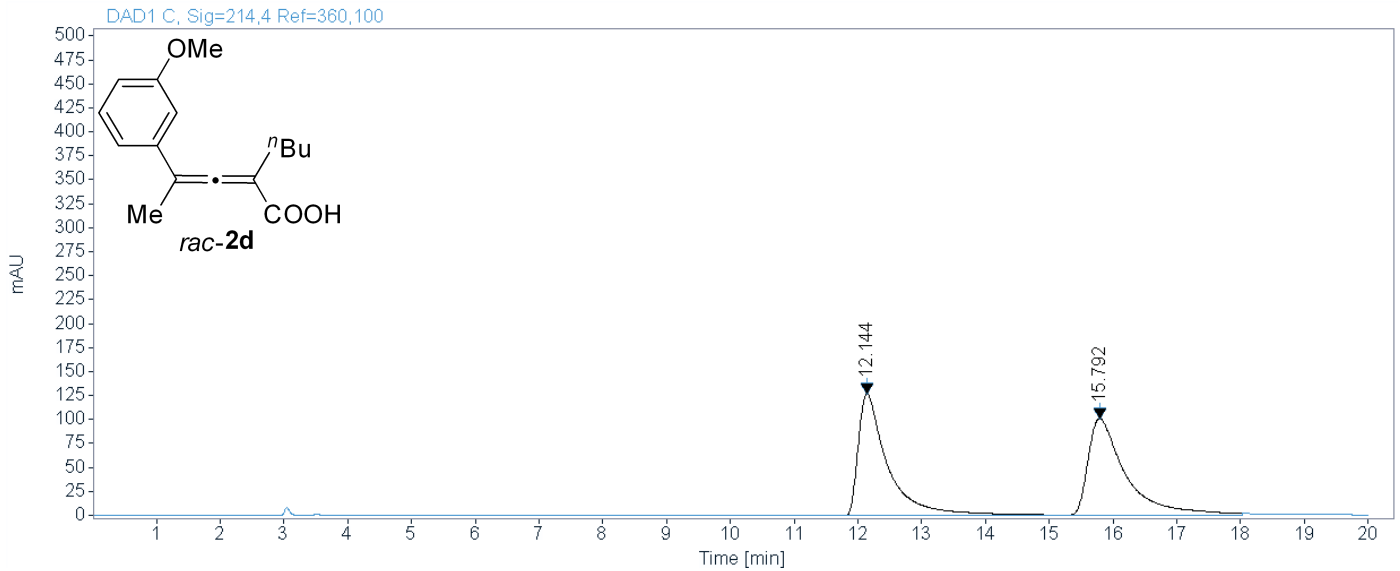

Signal: DAD1 C, Sig=214,4 Ref=360,100

| RT [min] | Width [min] | Height   | Area      | Area%    |
|----------|-------------|----------|-----------|----------|
| 12.144   | 0.4617      | 127.0507 | 4090.9783 | 49.9490  |
| 15.792   | 0.6793      | 100.5813 | 4099.3257 | 50.0510  |
|          |             | Sum      | 8190.3040 | 100.0000 |

WJ-1-025-2-H  
Jul 19 2019  
SOLVENT: CDCl3  
NA = 4  
F1 = 400.130005 MHz  
F2 = 1.000000 MHz

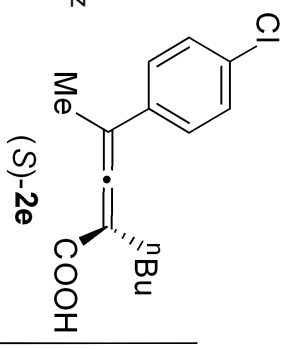

7.300  
7.256

2.339  
2.321  
2.302  
2.167

1.464  
1.445  
1.426  
1.408  
1.384  
1.367  
1.348  
1.329  
1.311  
1.294  
0.895  
0.877  
0.859  
0.000

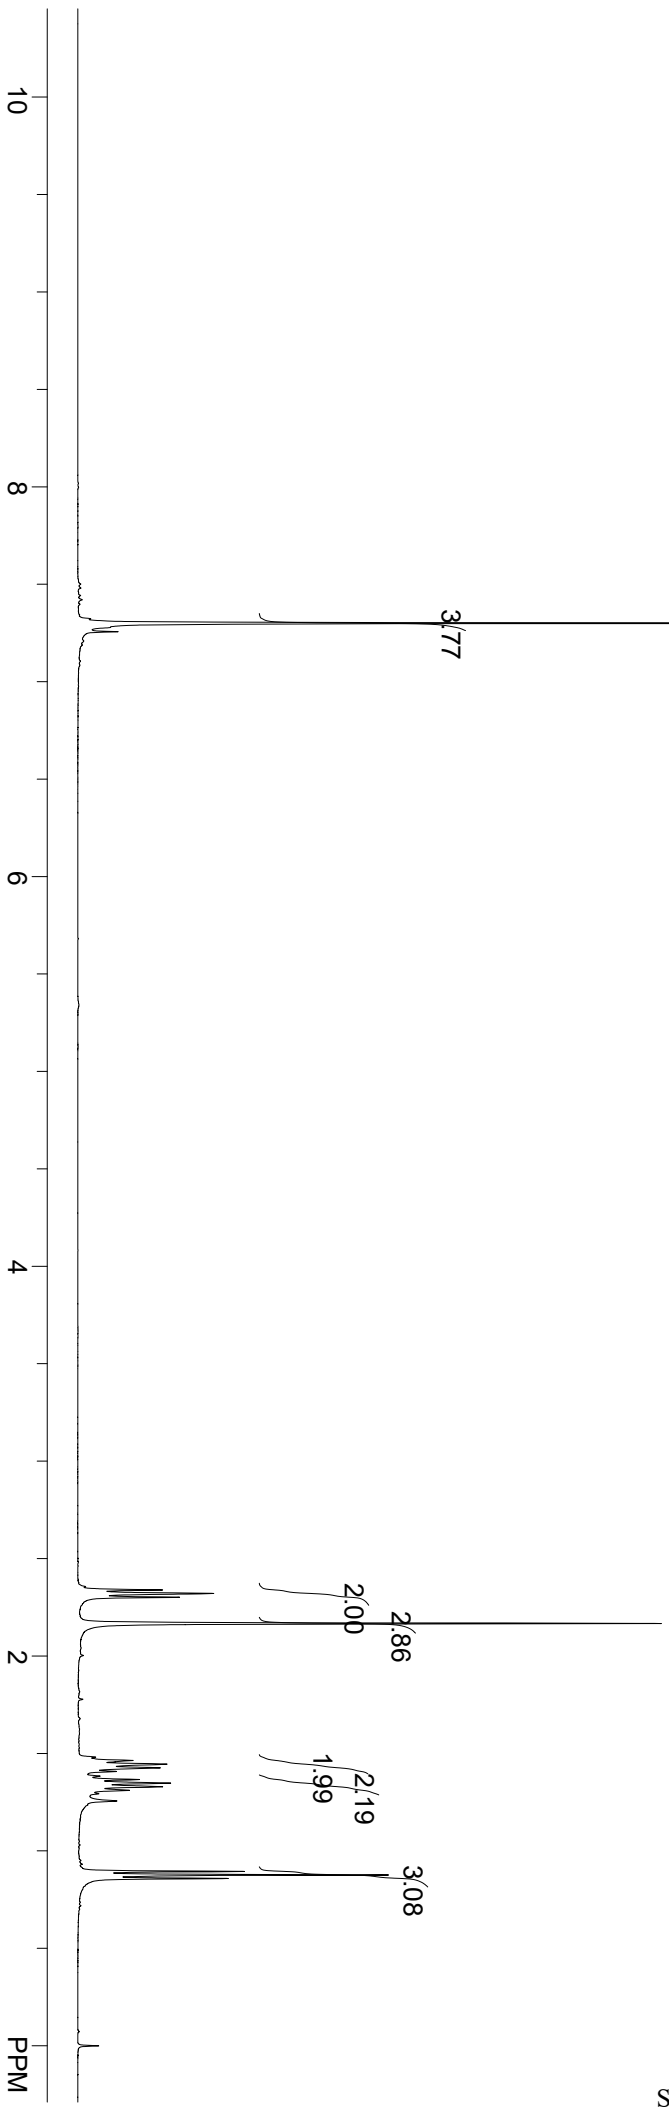

wj-1-025-2-C  
Jul 19 2019  
SOLVENT: CDCl3  
NA = 150  
F1 = 100.612770 MHz  
F2 = 1.000000 MHz

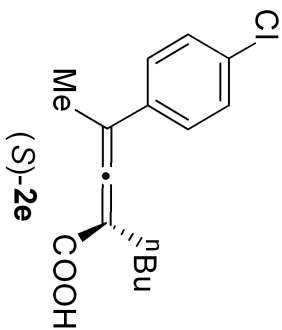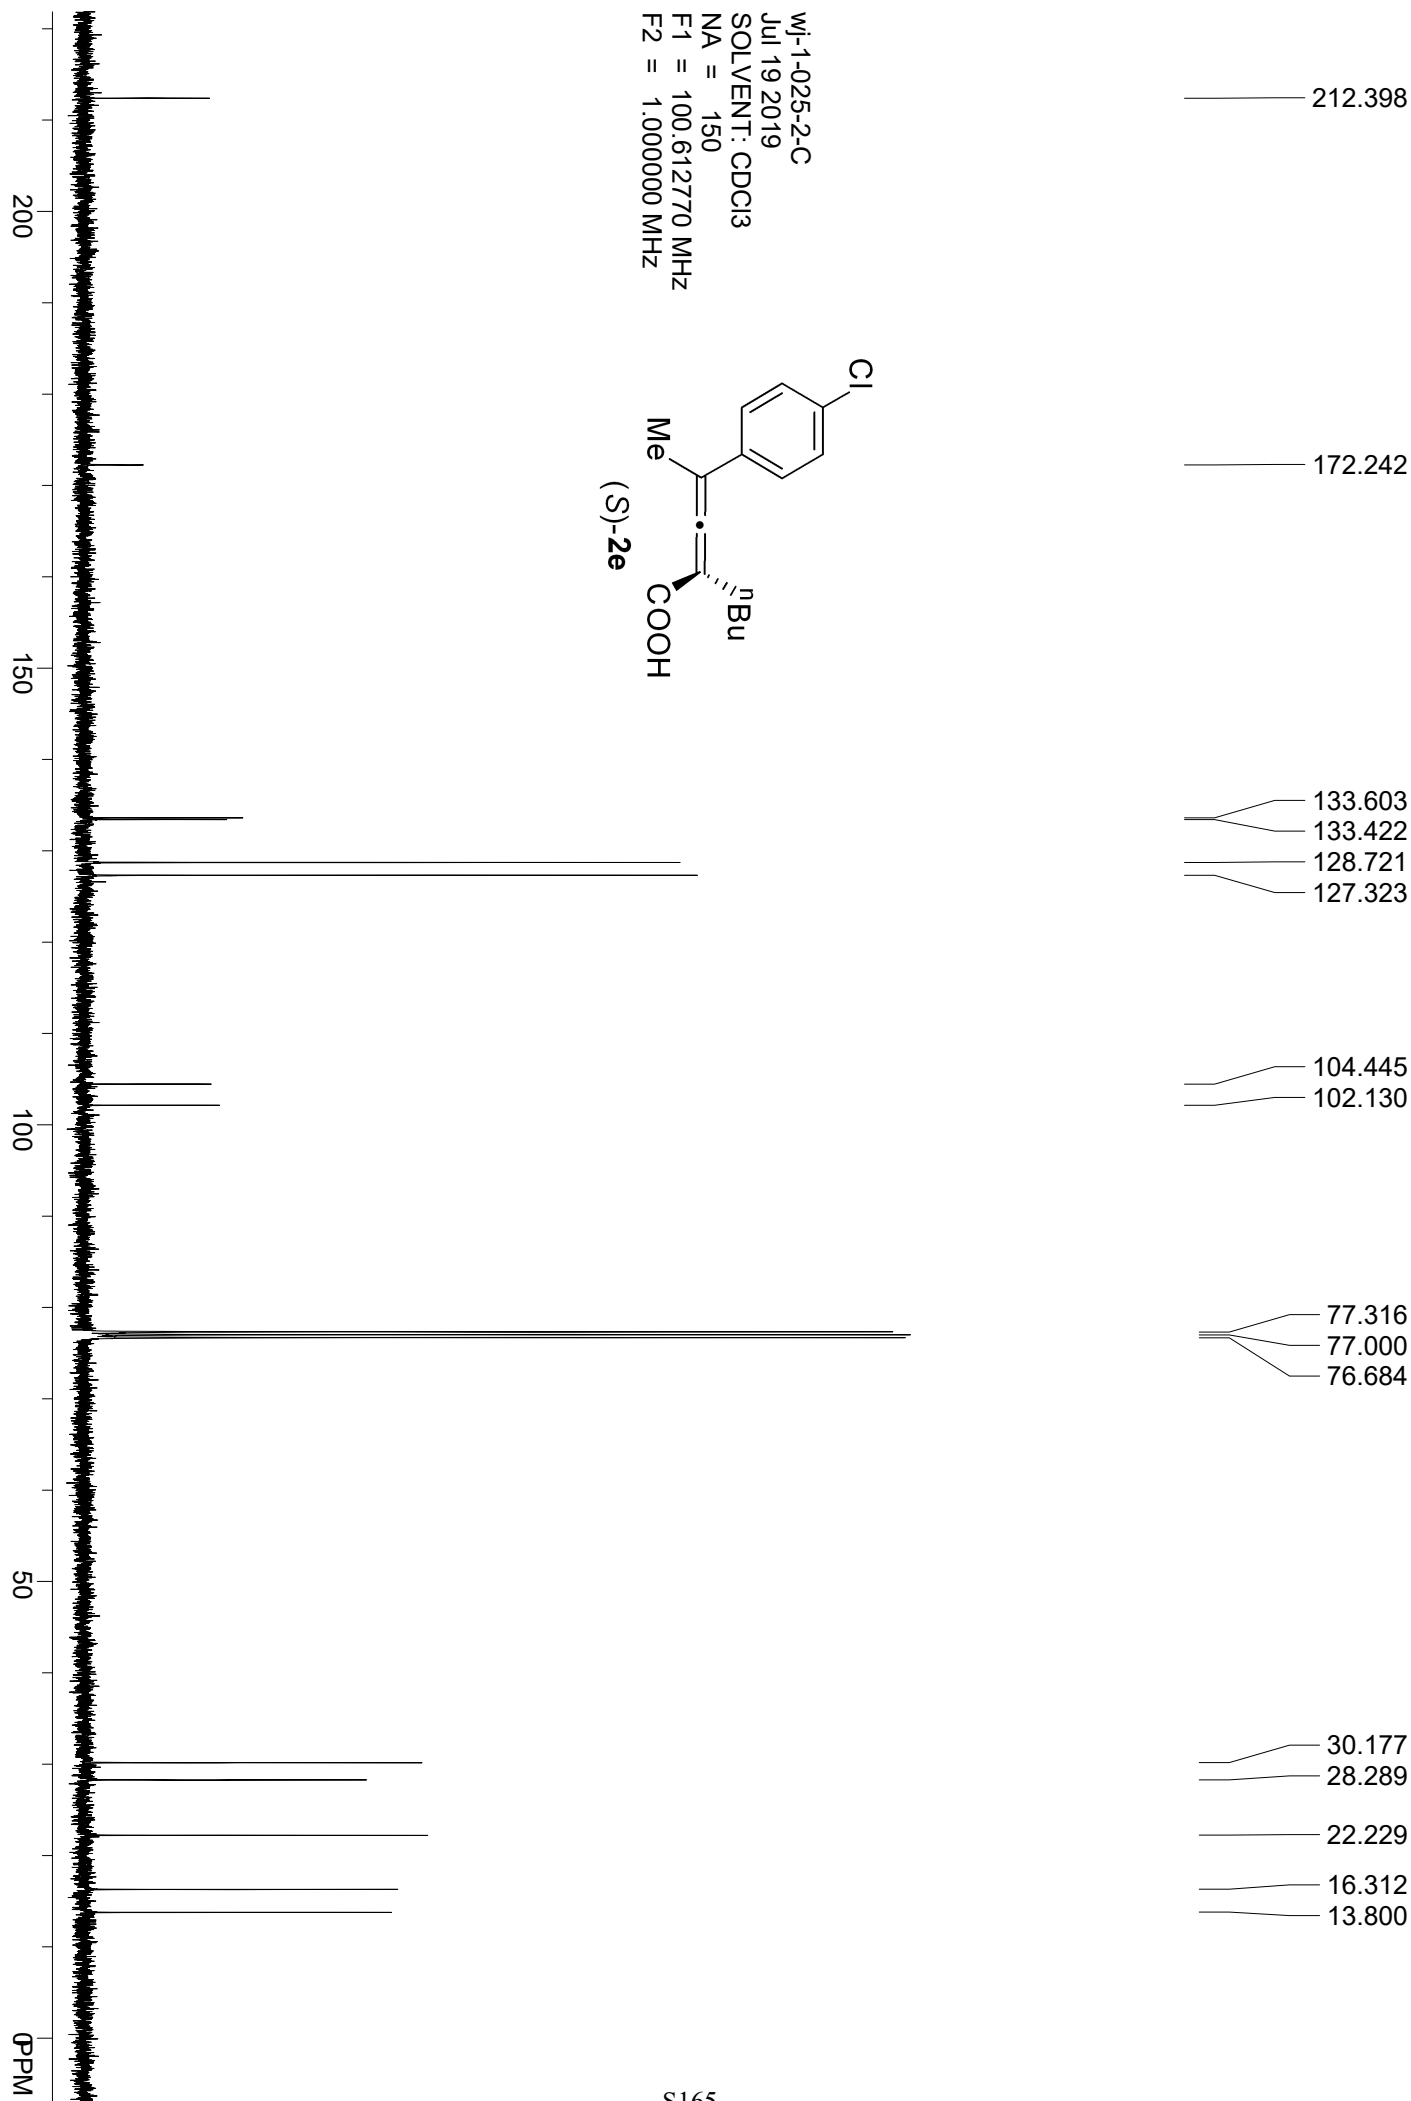

# Area Percent Report



Agilent Technologies

sample wj-1-025-2-AS-H-98-2-1.0-214

Data file: C:\Users\Public\Documents\ChemStation\1\Data\WJ\_LC 2019-07-19 19-25-49\005-P2-C3-wj-1-025-2.D

## Acquisition Data:

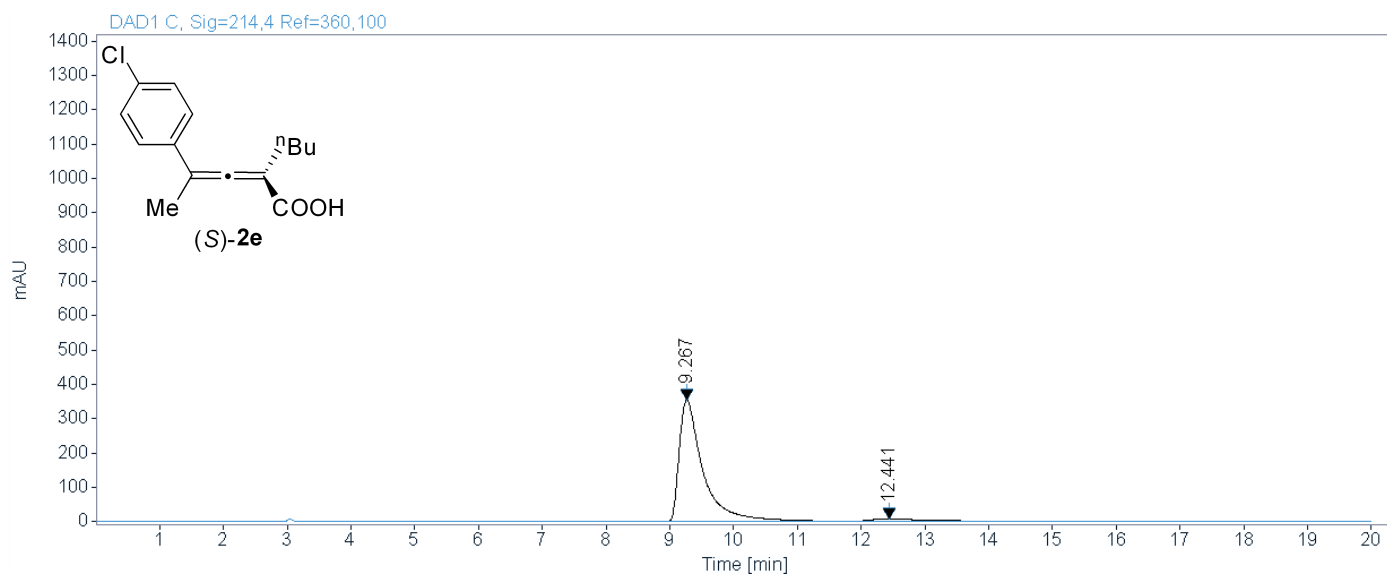

Signal: DAD1 C, Sig=214,4 Ref=360,100

| RT [min] | Width [min] | Height   | Area      | Area%    |
|----------|-------------|----------|-----------|----------|
| 9.267    | 0.3819      | 354.4984 | 9233.2666 | 95.5965  |
| 12.441   | 0.8294      | 7.4346   | 425.3109  | 4.4035   |
| Sum      |             |          | 9658.5775 | 100.0000 |

# Area Percent Report



Agilent Technologies

sample wj-1-025-2-rac-AS-H-98-2-1.0-214

Data file: C:\Users\Public\Documents\ChemStation\1\Data\WJ\_LC 2019-07-19 19-25-49\006-P2-C4-wj-1-025-2-rac.D

## Acquisition Data:

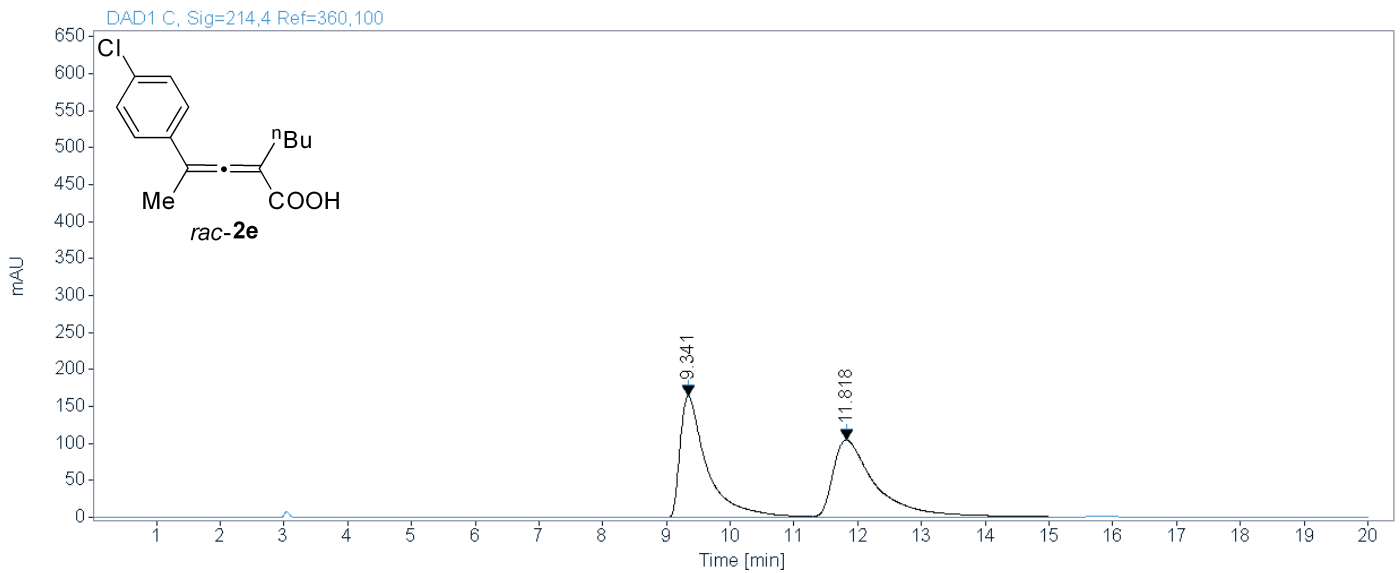

Signal: DAD1 C, Sig=214,4 Ref=360,100

| RT [min] | Width [min] | Height   | Area      | Area%    |
|----------|-------------|----------|-----------|----------|
| 9.341    | 0.4286      | 164.6044 | 4861.3979 | 49.8970  |
| 11.818   | 0.6826      | 104.5655 | 4881.4761 | 50.1030  |
|          |             | Sum      | 9742.8740 | 100.0000 |

wj-1-031-2-H  
Jul 23 2019  
SOLVENT: CDCl3  
NA = 4  
F1 = 400.130005 MHz  
F2 = 1.000000 MHz

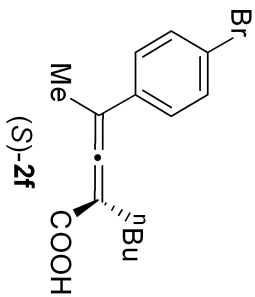

7.469  
7.448  
7.258  
7.246  
7.225

2.339  
2.321  
2.302  
2.166

1.479  
1.462  
1.443  
1.424  
1.406  
1.384  
1.366  
1.348  
1.329  
1.311  
1.293  
1.256  
0.895  
0.877  
0.859  
-0.000

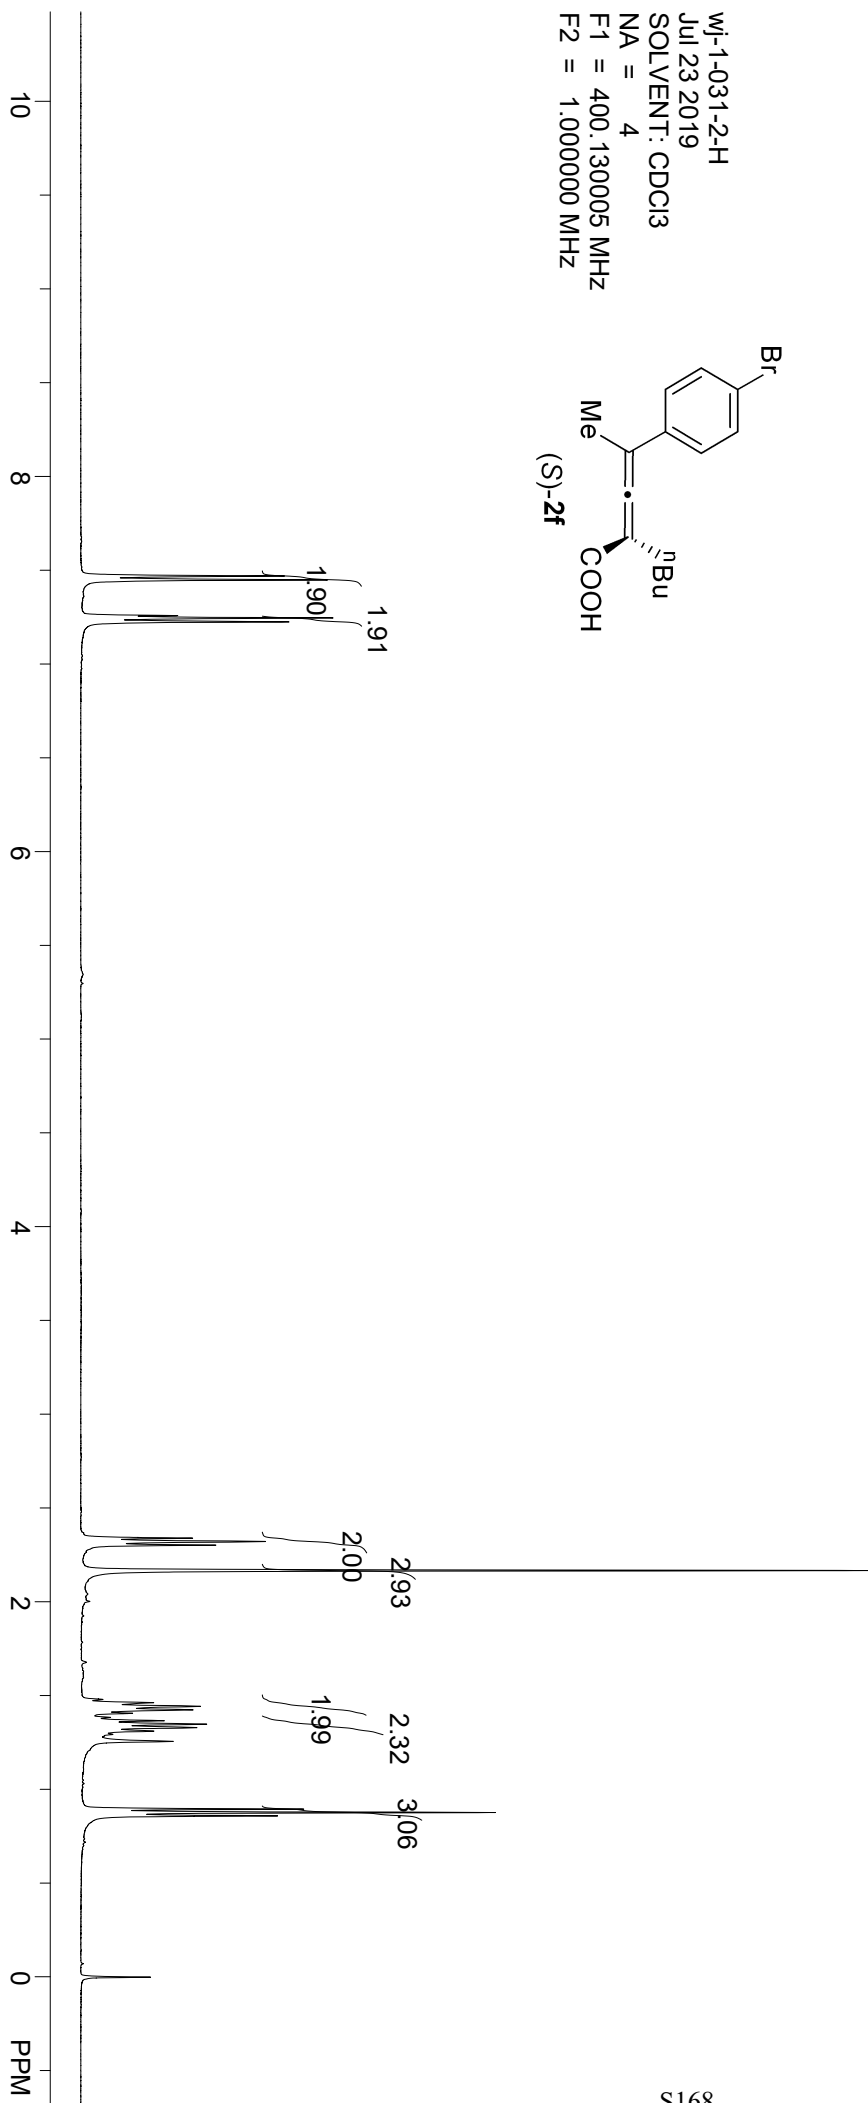



WJ-1-031-2-C  
JUL 23 2019  
SOLVENT: CDCl3  
NA = 250  
F1 = 100.612770 MHz  
F2 = 1.000000 MHz

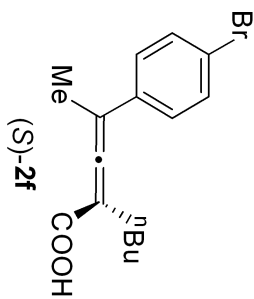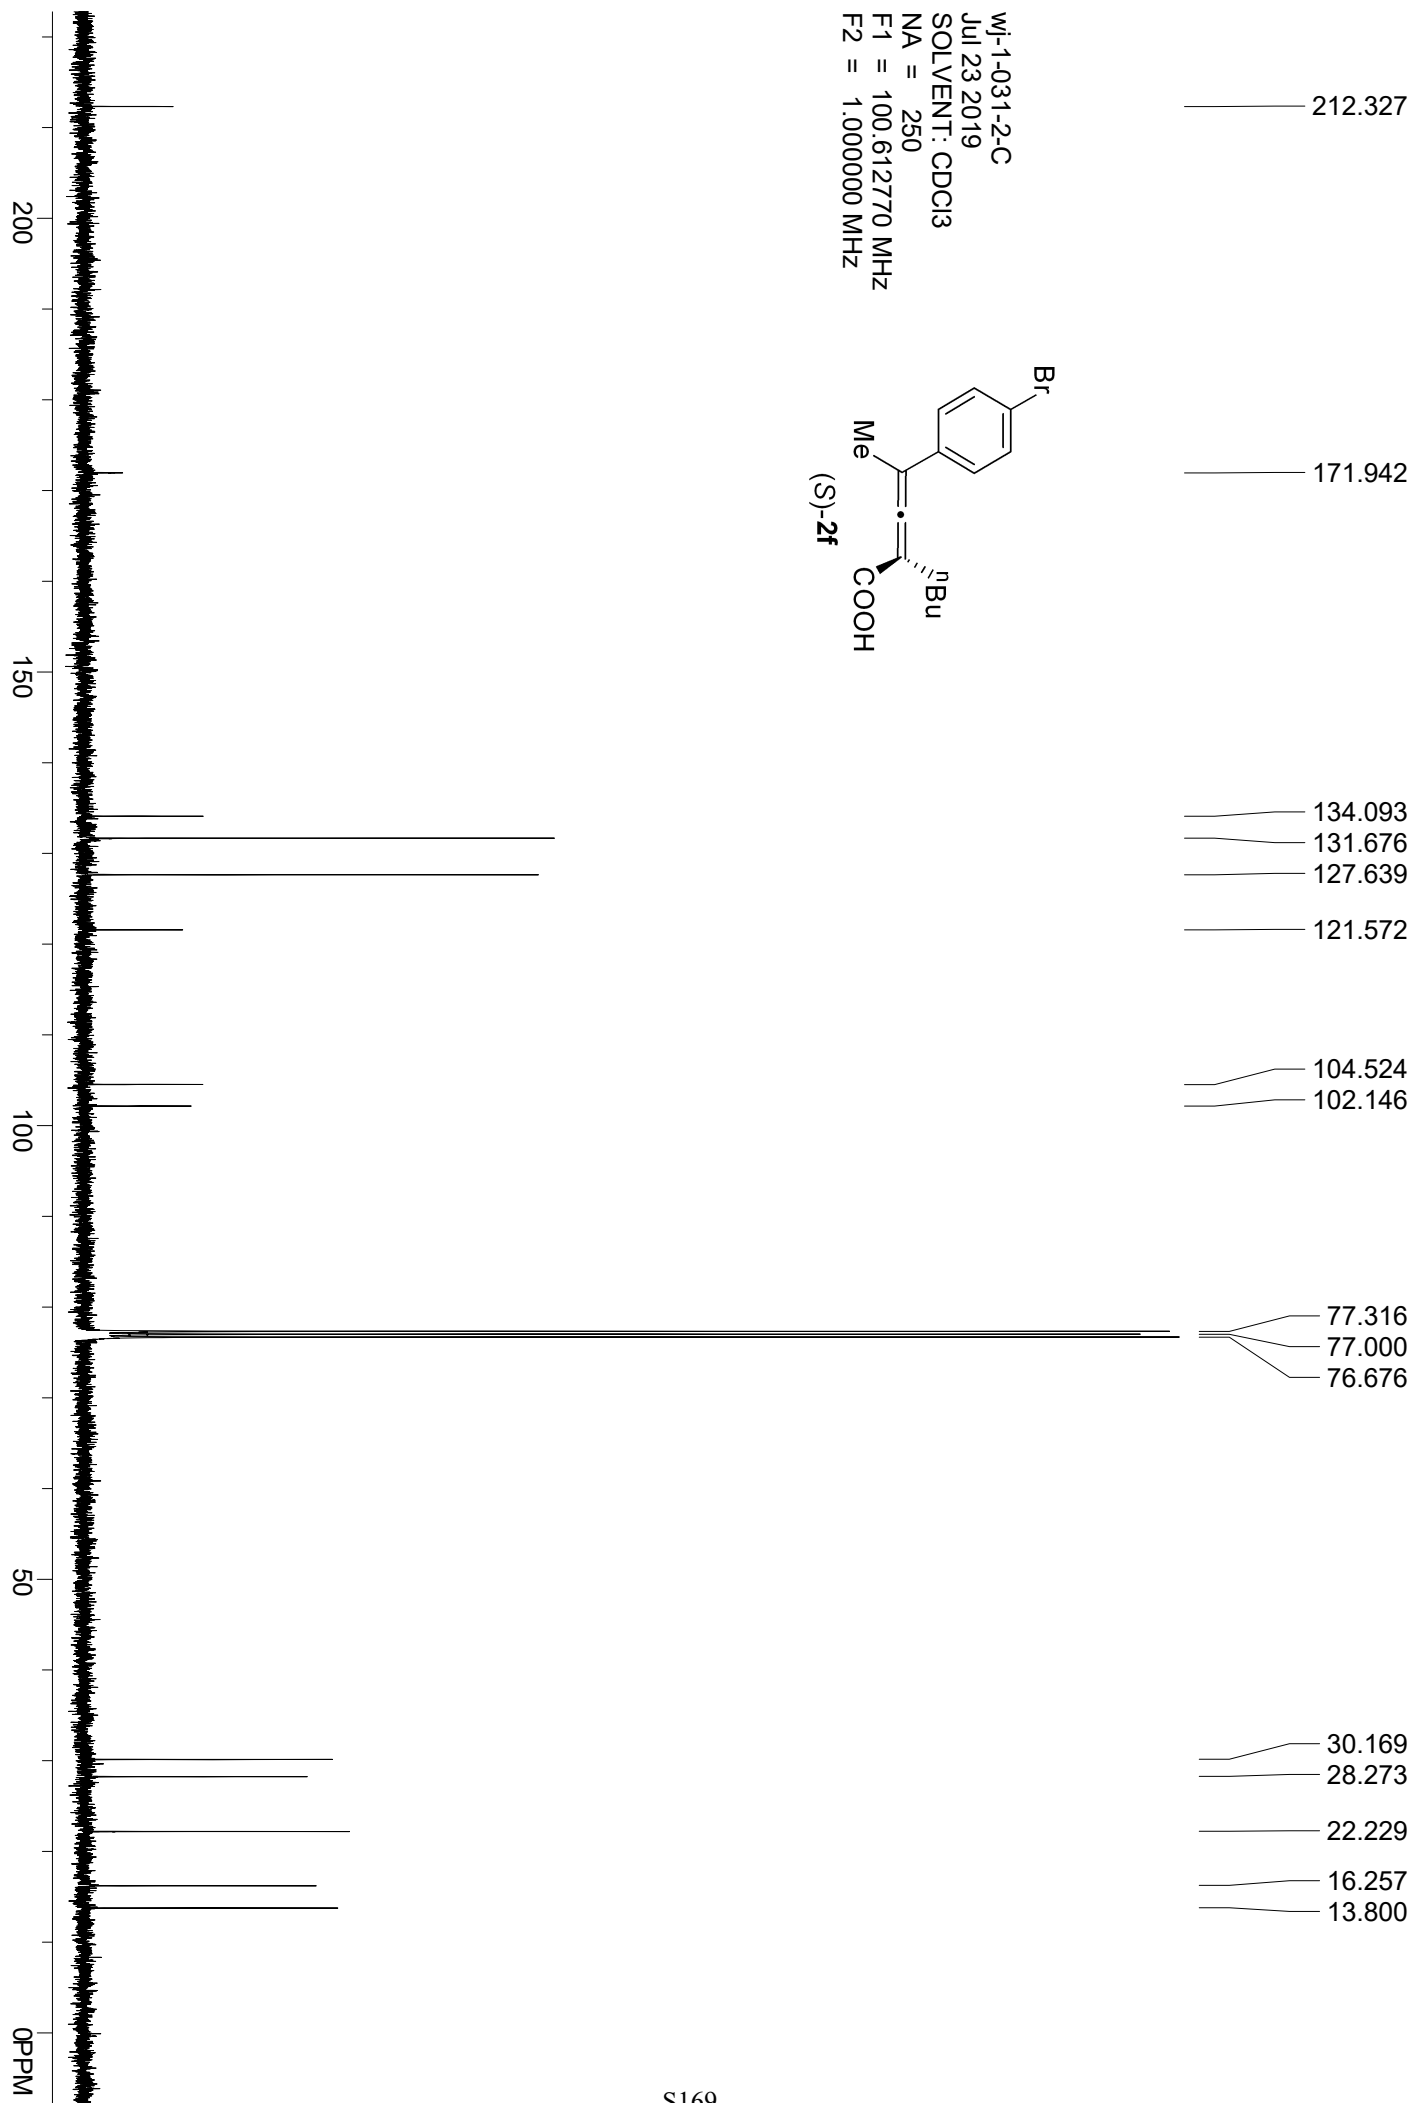

# Area Percent Report

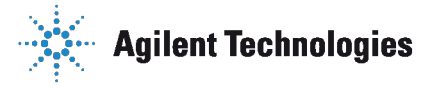

sample wj-1-031-2-AS-H-98-2-1.0-214

Data file: C:\Users\Public\Documents\ChemStation\1\Data\WJ\_LC 2019-07-24 08-34-00\022-P2-C1-wj-1-031-2.D

## Acquisition Data:

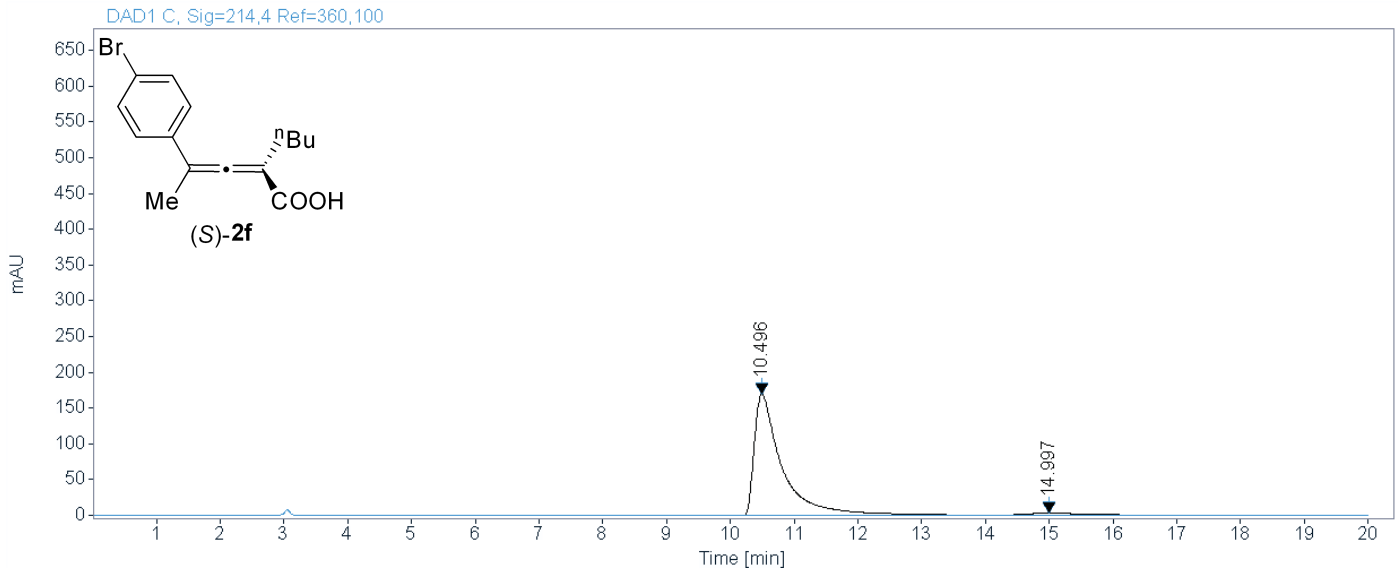

Signal: DAD1 C, Sig=214,4 Ref=360,100

| RT [min] | Width [min] | Height   | Area      | Area%    |
|----------|-------------|----------|-----------|----------|
| 10.496   | 0.4347      | 170.1617 | 5202.1748 | 96.5075  |
| 14.997   | 1.1338      | 2.7674   | 188.2598  | 3.4925   |
| Sum      |             |          | 5390.4346 | 100.0000 |

# Area Percent Report



Agilent Technologies

sample wj-1-031-2-rac-AS-H-98-2-1.0-214

Data file: C:\Users\Public\Documents\ChemStation\1\Data\WJ\_LC 2019-07-24 08-34-00\023-P2-C2-wj-1-031-2-rac.D

## Acquisition Data:

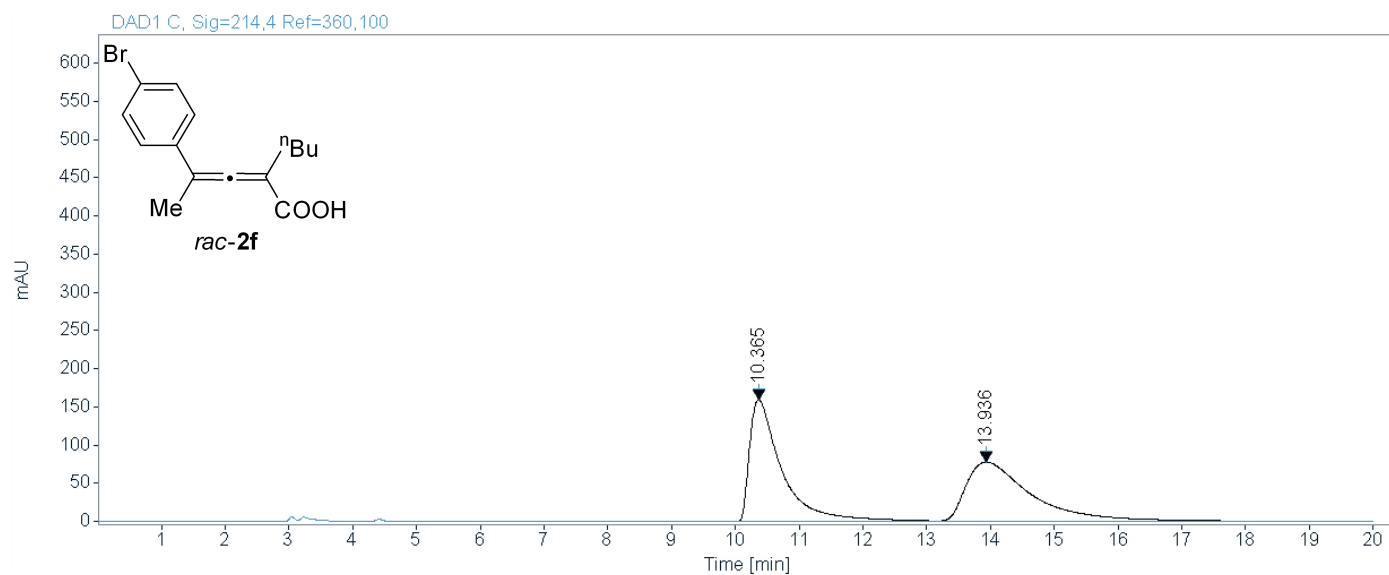

Signal: DAD1 C, Sig=214,4 Ref=360,100

| RT [min] | Width [min] | Height   | Area       | Area%    |
|----------|-------------|----------|------------|----------|
| 10.365   | 0.5807      | 159.1867 | 5546.7344  | 50.4681  |
| 13.936   | 1.0391      | 77.1657  | 5443.8462  | 49.5319  |
| Sum      |             |          | 10990.5806 | 100.0000 |

wj-1-032-2-H  
Jul 24 2019  
SOLVENT: CDCl3  
NA = 4  
F1 = 400.130005 MHz  
F2 = 1.000000 MHz

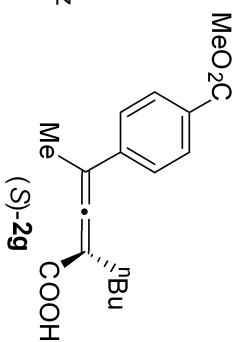

8.014  
7.993

7.445  
7.425  
7.264

3.917

2.362  
2.344  
2.325  
2.211

1.495  
1.478  
1.458  
1.440  
1.422  
1.389  
1.371  
1.353  
1.335  
1.316  
1.299  
0.893  
0.875  
0.857  
0.000

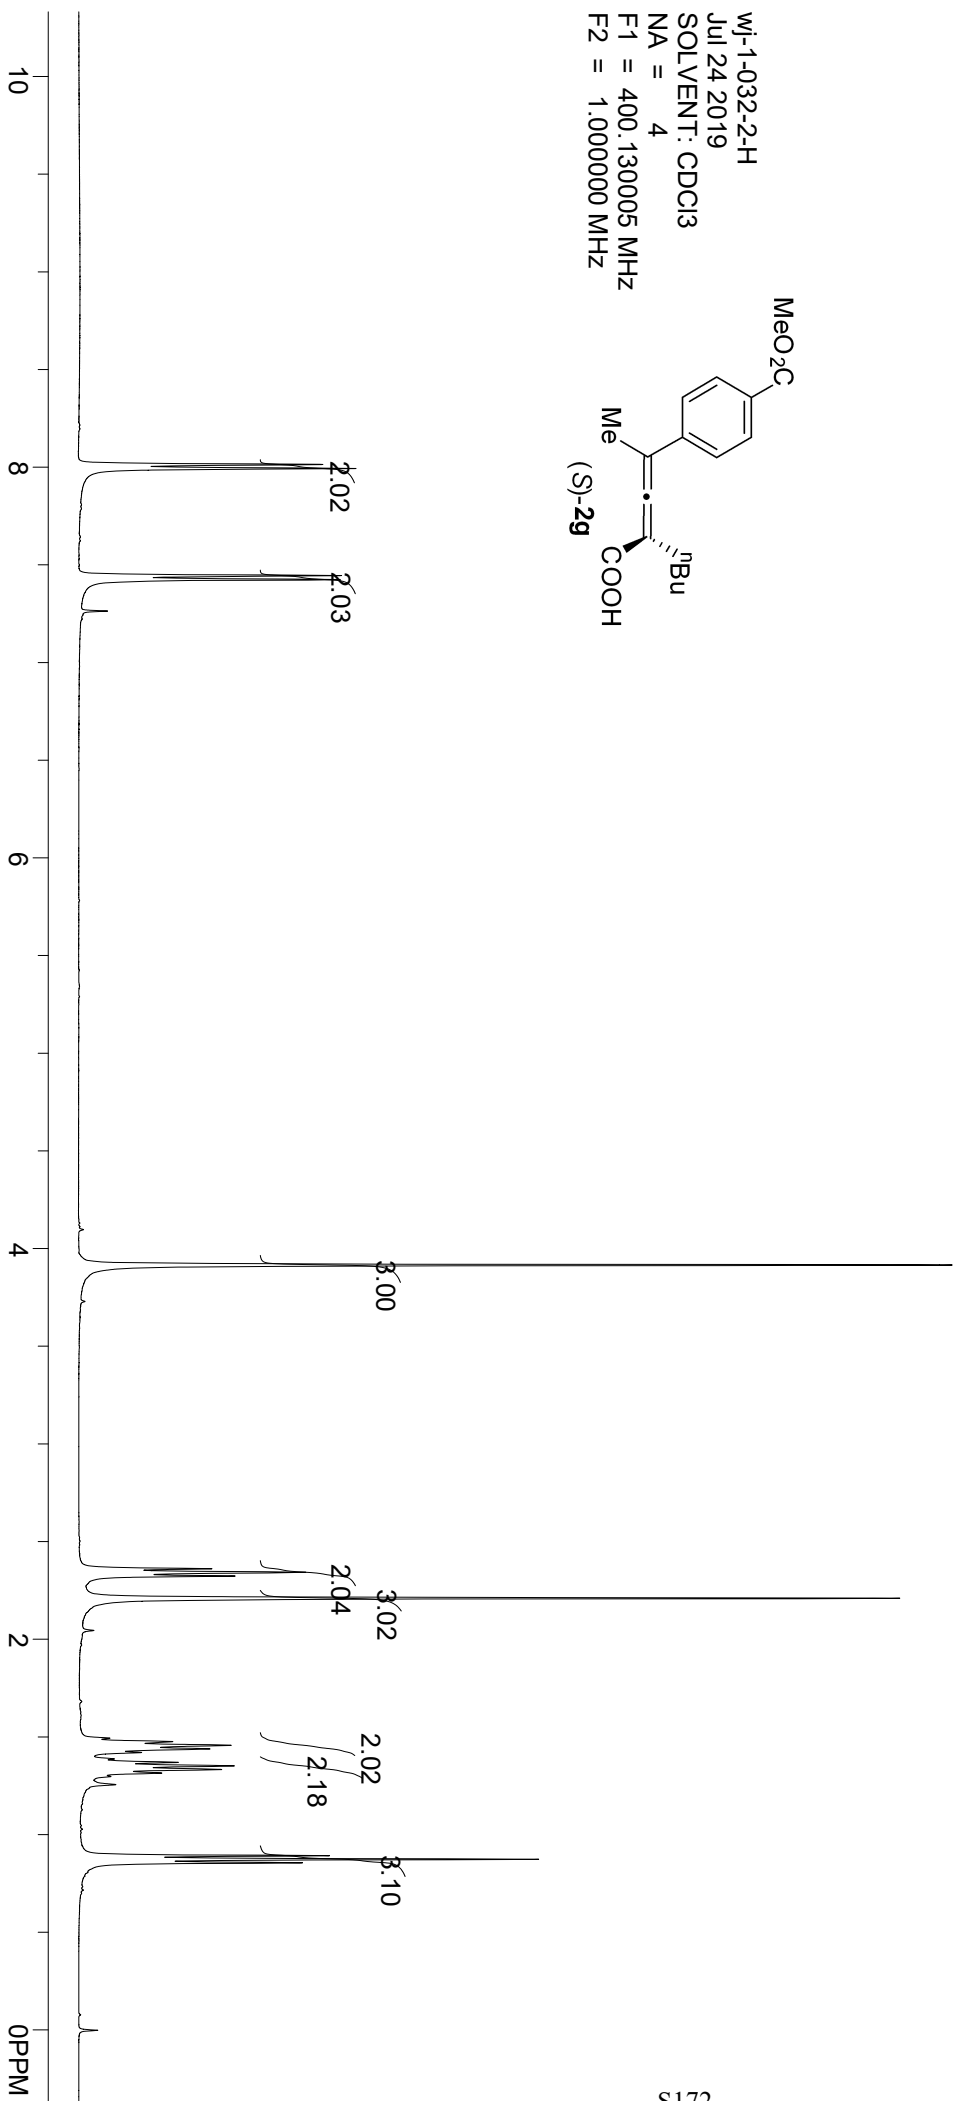

wj-1-032-2-C  
Jul 24 2019  
SOLVENT: CDCl3  
NA = 150  
F1 = 100.612770 MHz  
F2 = 1.000000 MHz

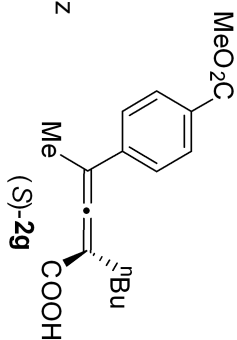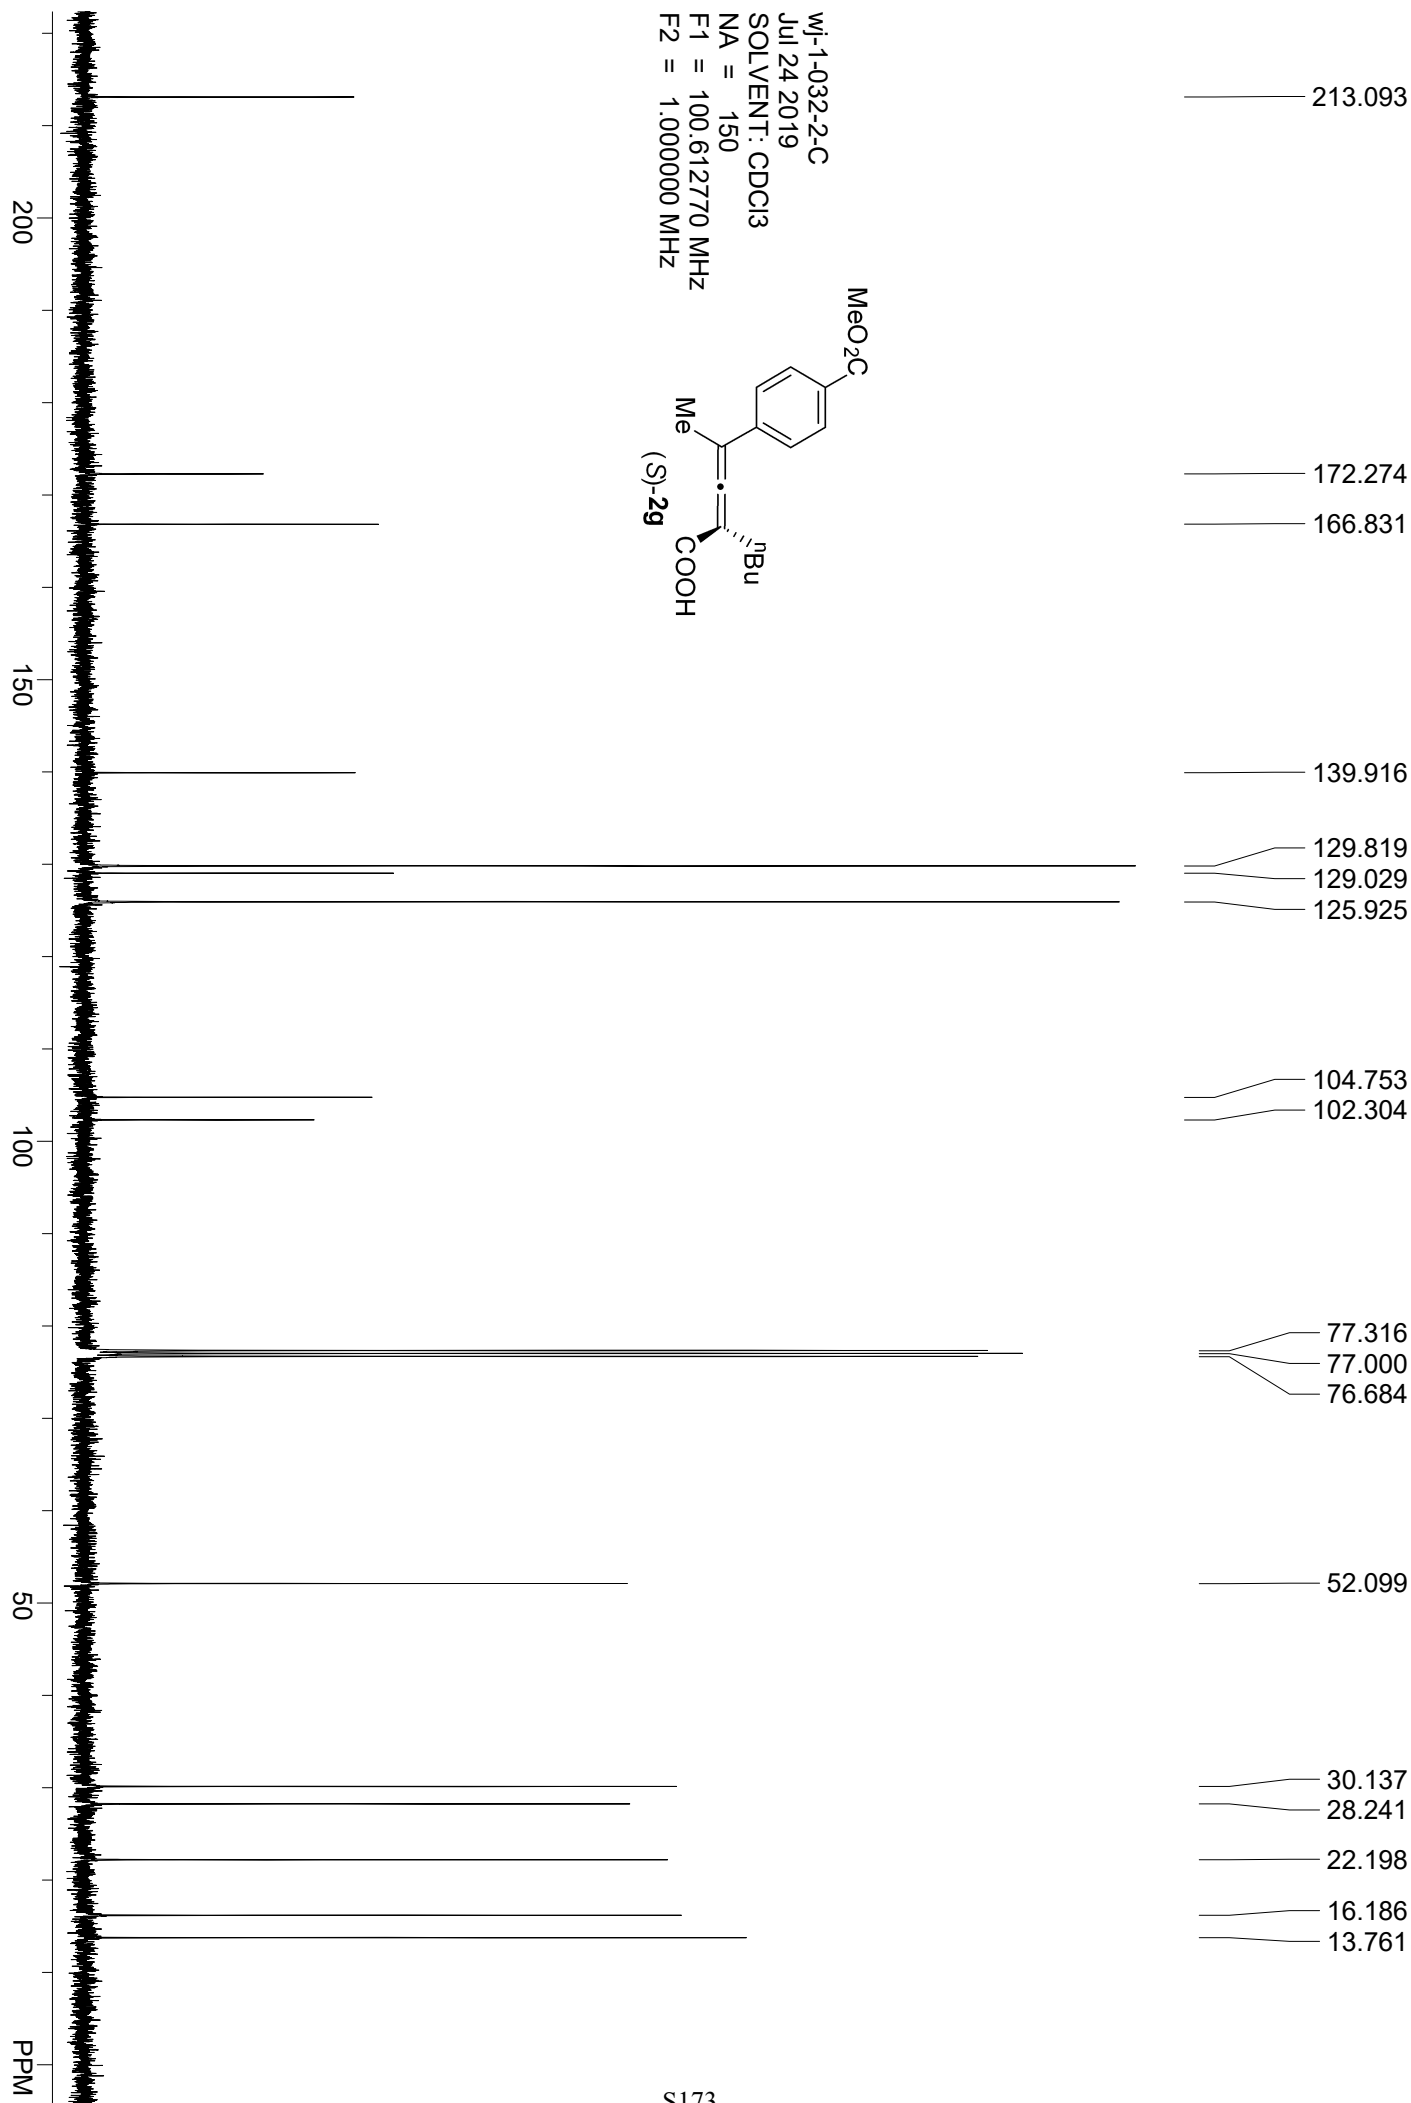

# Area Percent Report



Agilent Technologies

sample wj-1-032-2-AS-H-95-5-1.0-214

Data file: C:\Users\Public\Documents\ChemStation\1\Data\WJ\_LC 2019-07-24 08-34-00\028-P2-C5-wj-1-032-2.D

## Acquisition Data:

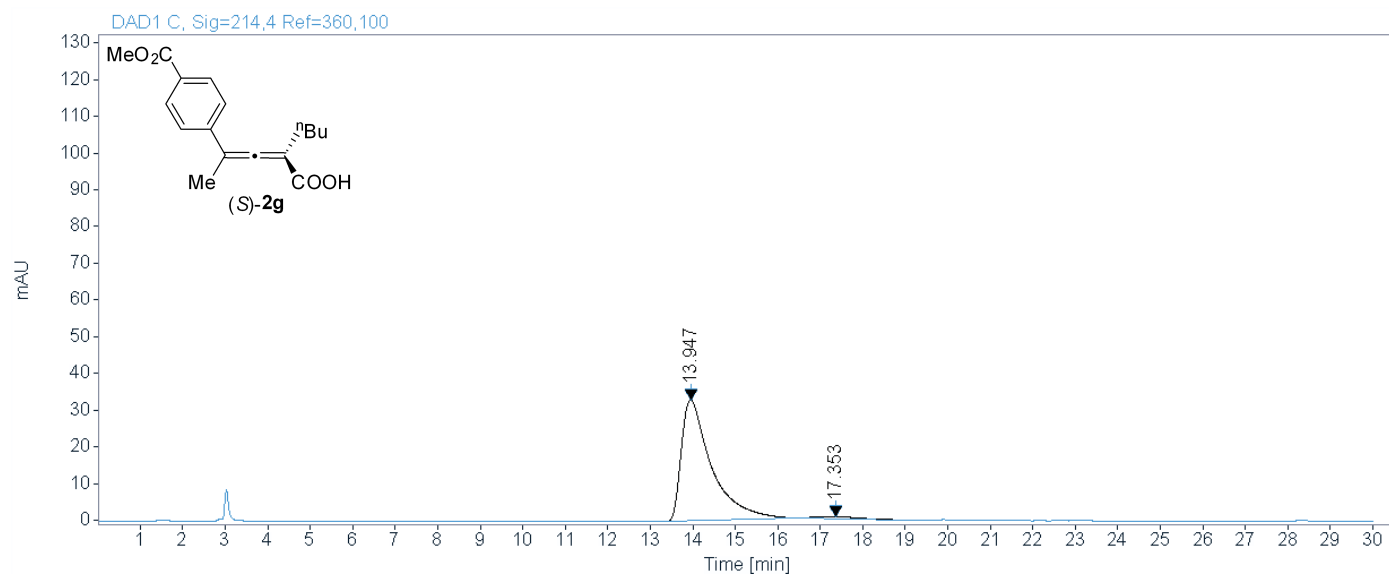

Signal: DAD1 C, Sig=214,4 Ref=360,100

| RT [min] | Width [min] | Height  | Area      | Area%    |
|----------|-------------|---------|-----------|----------|
| 13.947   | 0.7116      | 32.9281 | 1613.4130 | 97.8007  |
| 17.353   | 1.1921      | 0.5072  | 36.2815   | 2.1993   |
|          | Sum         |         | 1649.6944 | 100.0000 |

# Area Percent Report



Agilent Technologies

sample wj-1-032-2-rac-AS-H-95-5-1.0-214

Data file: C:\Users\Public\Documents\ChemStation\1\Data\WJ\_LC 2019-07-24 08-34-00\027-P2-C6-wj-1-032-2-rac.D

## Acquisition Data:

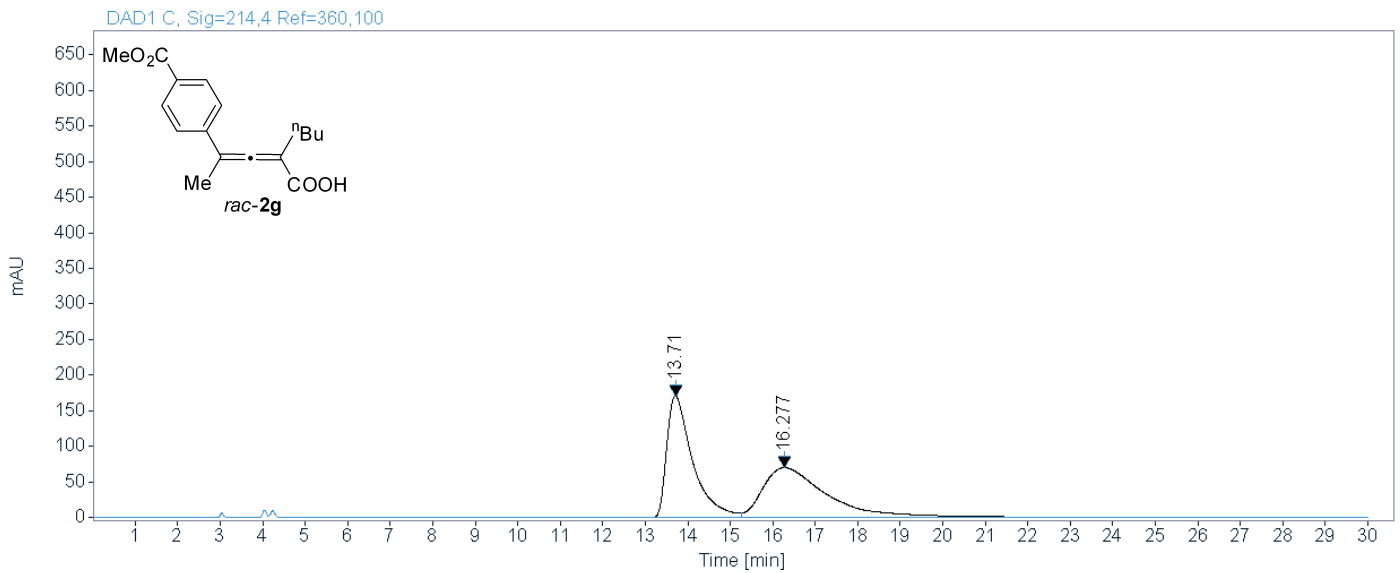

Signal: DAD1 C, Sig=214,4 Ref=360,100

| RT [min] | Width [min] | Height   | Area       | Area%    |
|----------|-------------|----------|------------|----------|
| 13.710   | 0.6978      | 170.9039 | 7155.1748  | 49.7312  |
| 16.277   | 1.7256      | 69.8552  | 7232.5112  | 50.2688  |
|          |             | Sum      | 14387.6860 | 100.0000 |

wj-1-047-2-H  
Sep 09 2019  
SOLVENT: CDCl3  
NA = 4  
F1 = 400.130035 MHz  
F2 = 1.000000 MHz

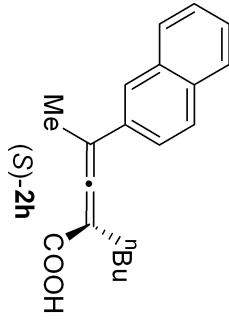

7.818  
7.800  
7.762  
7.746  
7.517  
7.496  
7.478  
7.459  
7.450  
7.441  
7.422  
7.224

2.387  
2.369  
2.350  
2.300

1.524  
1.507  
1.488  
1.470  
1.451  
1.423  
1.405  
1.387  
1.369  
1.351  
1.333  
1.315  
0.893  
0.875  
0.857  
-0.000

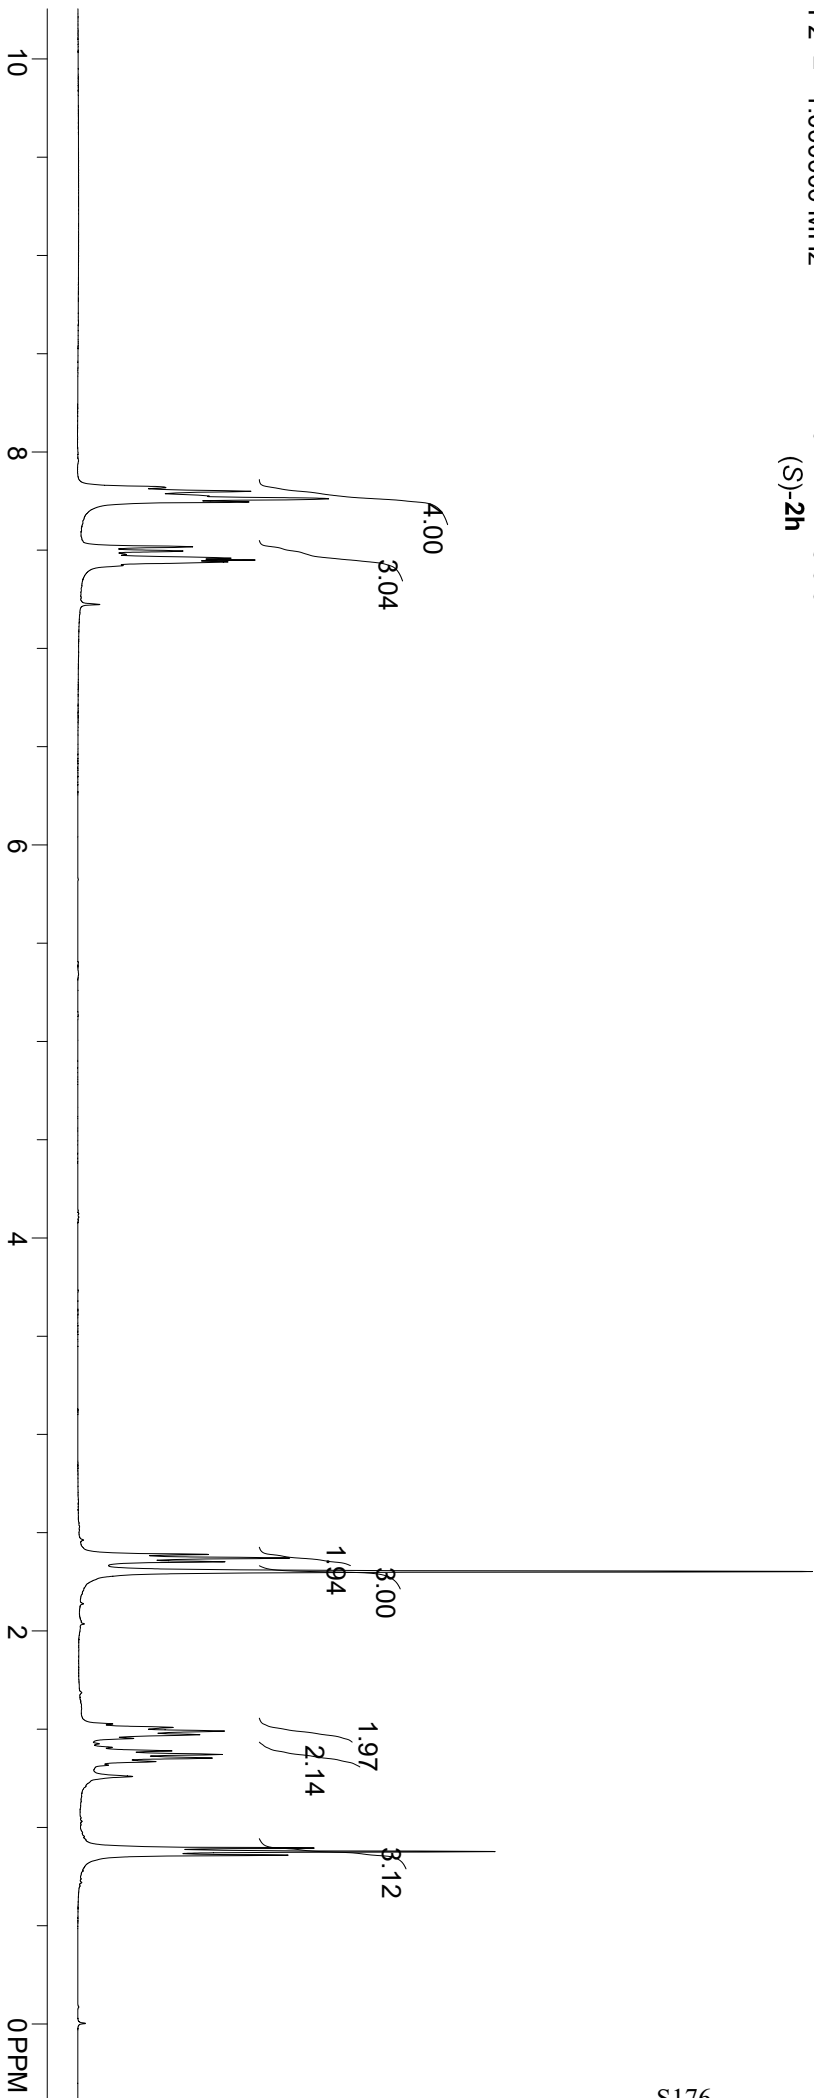



wj-1-047-2-C  
Sep 09 2019  
SOLVENT: CDCl3  
NA = 200  
F1 = 100.612770 MHz  
F2 = 1.000000 MHz

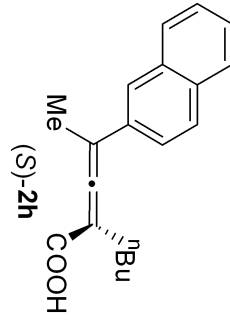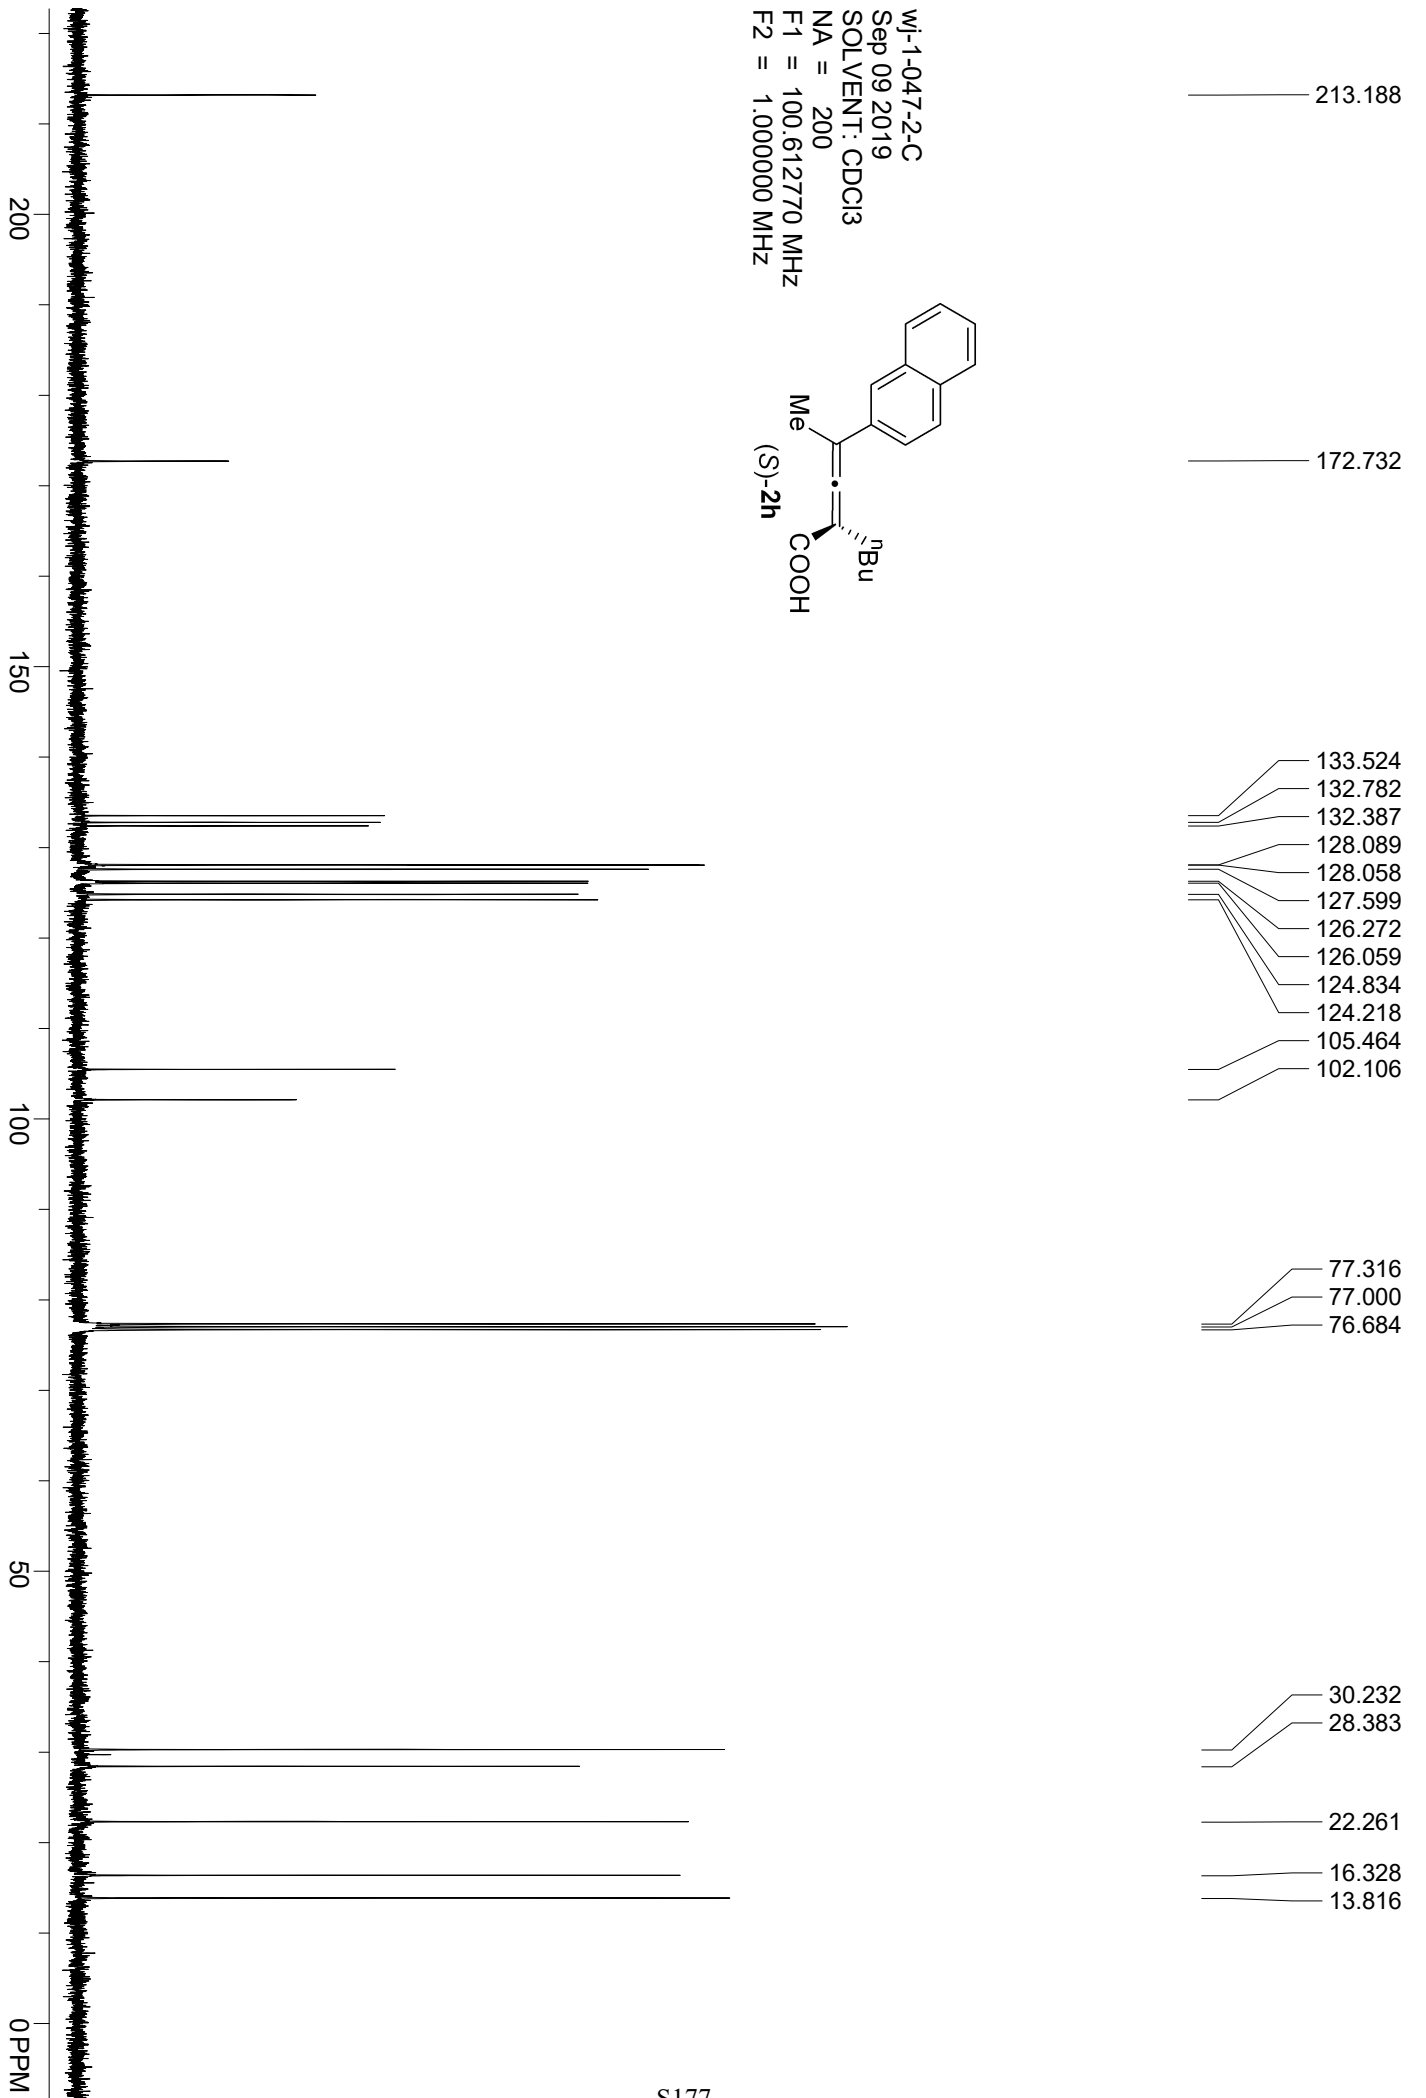

# Area Percent Report



Agilent Technologies

sample wj-1-047-2-AS-H-95-5-1.0-214

Data file: C:\Users\Public\Documents\ChemStation\1\Data\zwf-allenioc acid\_LC 2019-09-09 16-35-10\036-P2-C7-wj-1-047-2.D

## Acquisition Data:

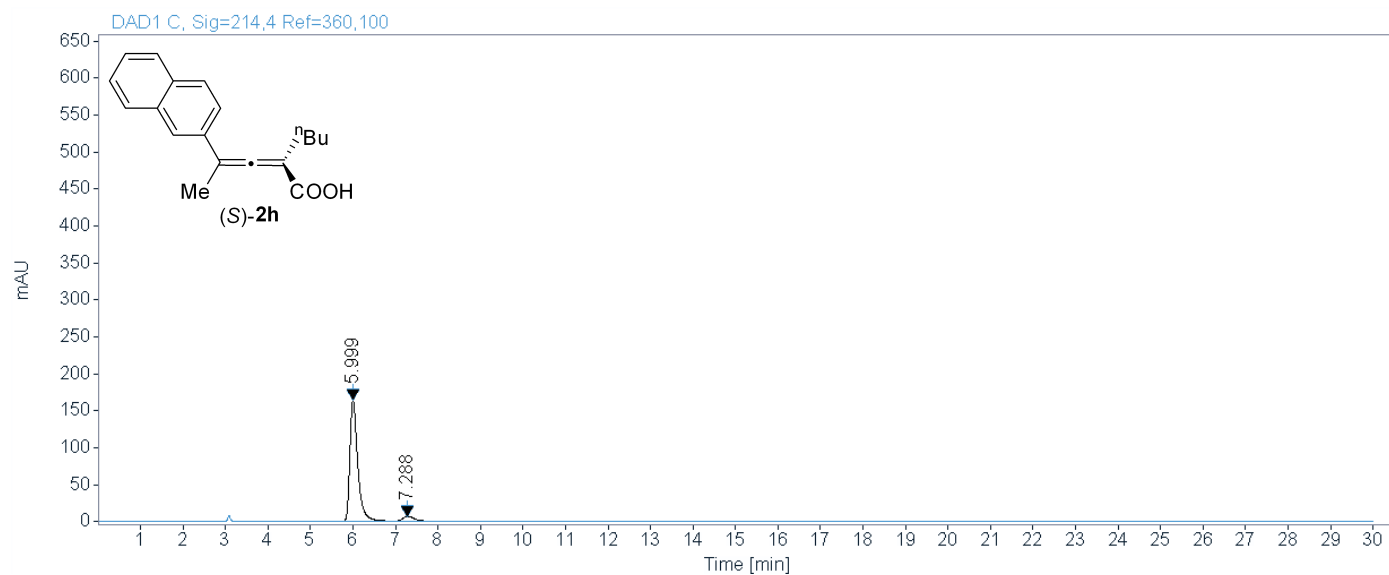

Signal: DAD1 C, Sig=214,4 Ref=360,100

| RT [min] | Width [min] | Height   | Area      | Area%    |
|----------|-------------|----------|-----------|----------|
| 5.999    | 0.1945      | 164.5141 | 2122.4004 | 94.9958  |
| 7.288    | 0.2962      | 6.2918   | 111.8043  | 5.0042   |
| Sum      |             |          | 2234.2047 | 100.0000 |

# Area Percent Report



sample wj-1-047-2-rac-AS-H-95-5-1.0-214

Data file: C:\Users\Public\Documents\ChemStation\1\Data\zwf-allenioc acid\_LC 2019-09-09 16-35-10\037-P2-C8-wj-1-047-2-rac.D

## Acquisition Data:

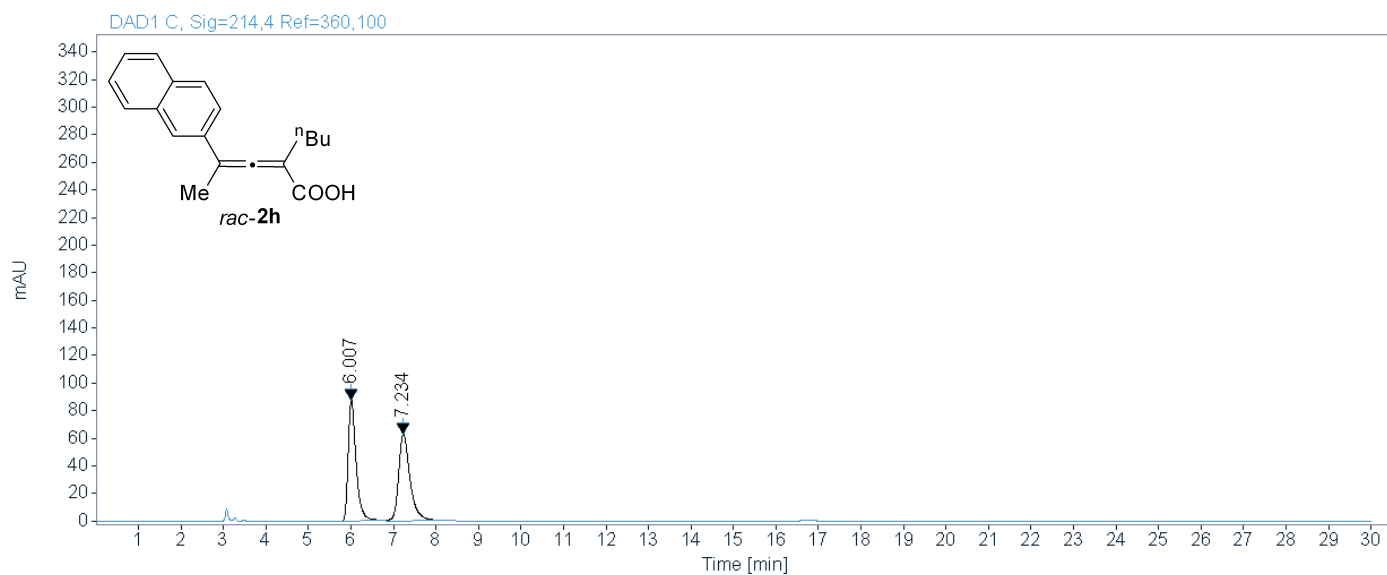

Signal: DAD1 C, Sig=214,4 Ref=360,100

| RT [min] | Width [min] | Height  | Area      | Area%    |
|----------|-------------|---------|-----------|----------|
| 6.007    | 0.2178      | 88.2336 | 1152.8596 | 49.5780  |
| 7.234    | 0.3097      | 63.0879 | 1172.4857 | 50.4220  |
|          |             | Sum     | 2325.3453 | 100.0000 |

wj-1-036-2-H  
Aug 28 2019  
SOLVENT: CDCl3  
NA = 4  
F1 = 400.130005 MHz  
F2 = 1.000000 MHz

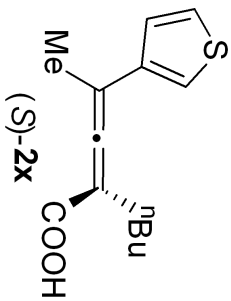

7.284  
7.277  
7.272  
7.264  
7.252  
7.155  
7.150  
7.048  
7.036

2.330  
2.312  
2.292  
2.169

1.490  
1.473  
1.454  
1.435  
1.417  
1.394  
1.376  
1.358  
1.339  
1.321  
1.303  
0.901  
0.883  
0.865  
0.000

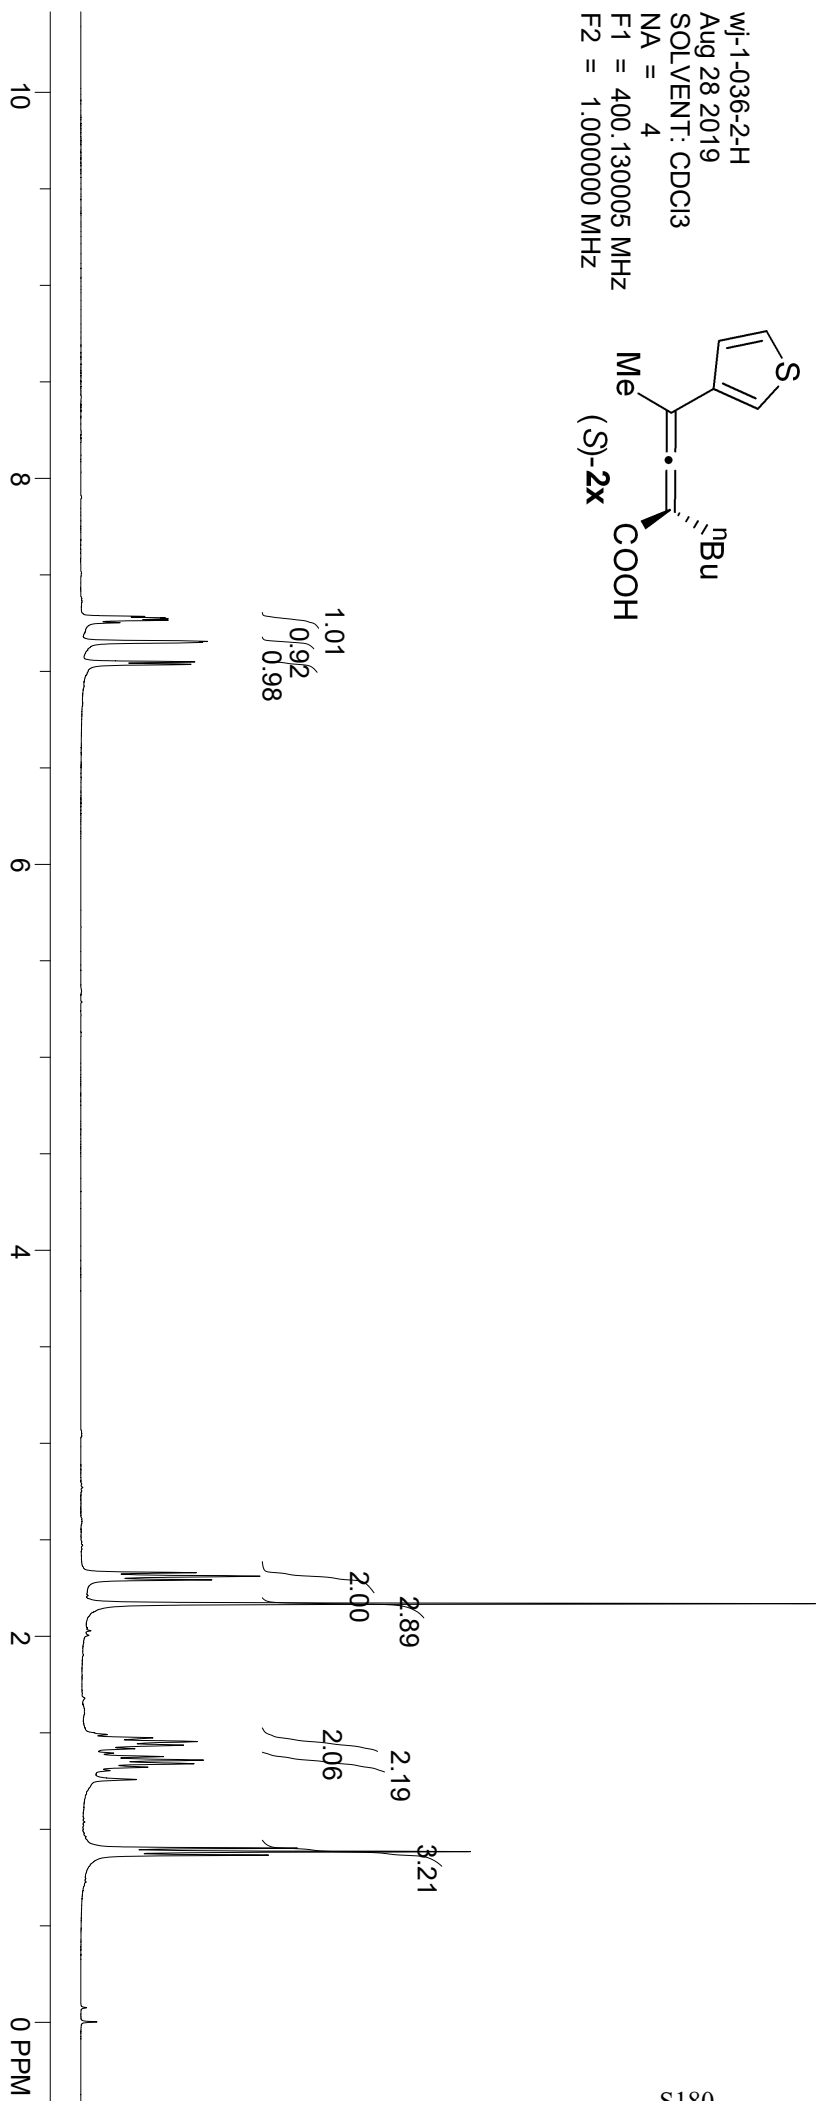

wj-1-036-2-C  
Aug 28 2019  
SOLVENT: CDCl3  
NA = 400  
F1 = 100.612770 MHz  
F2 = 1.000000 MHz

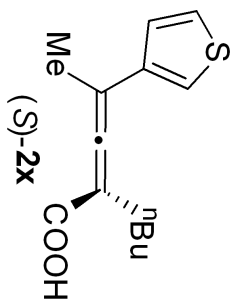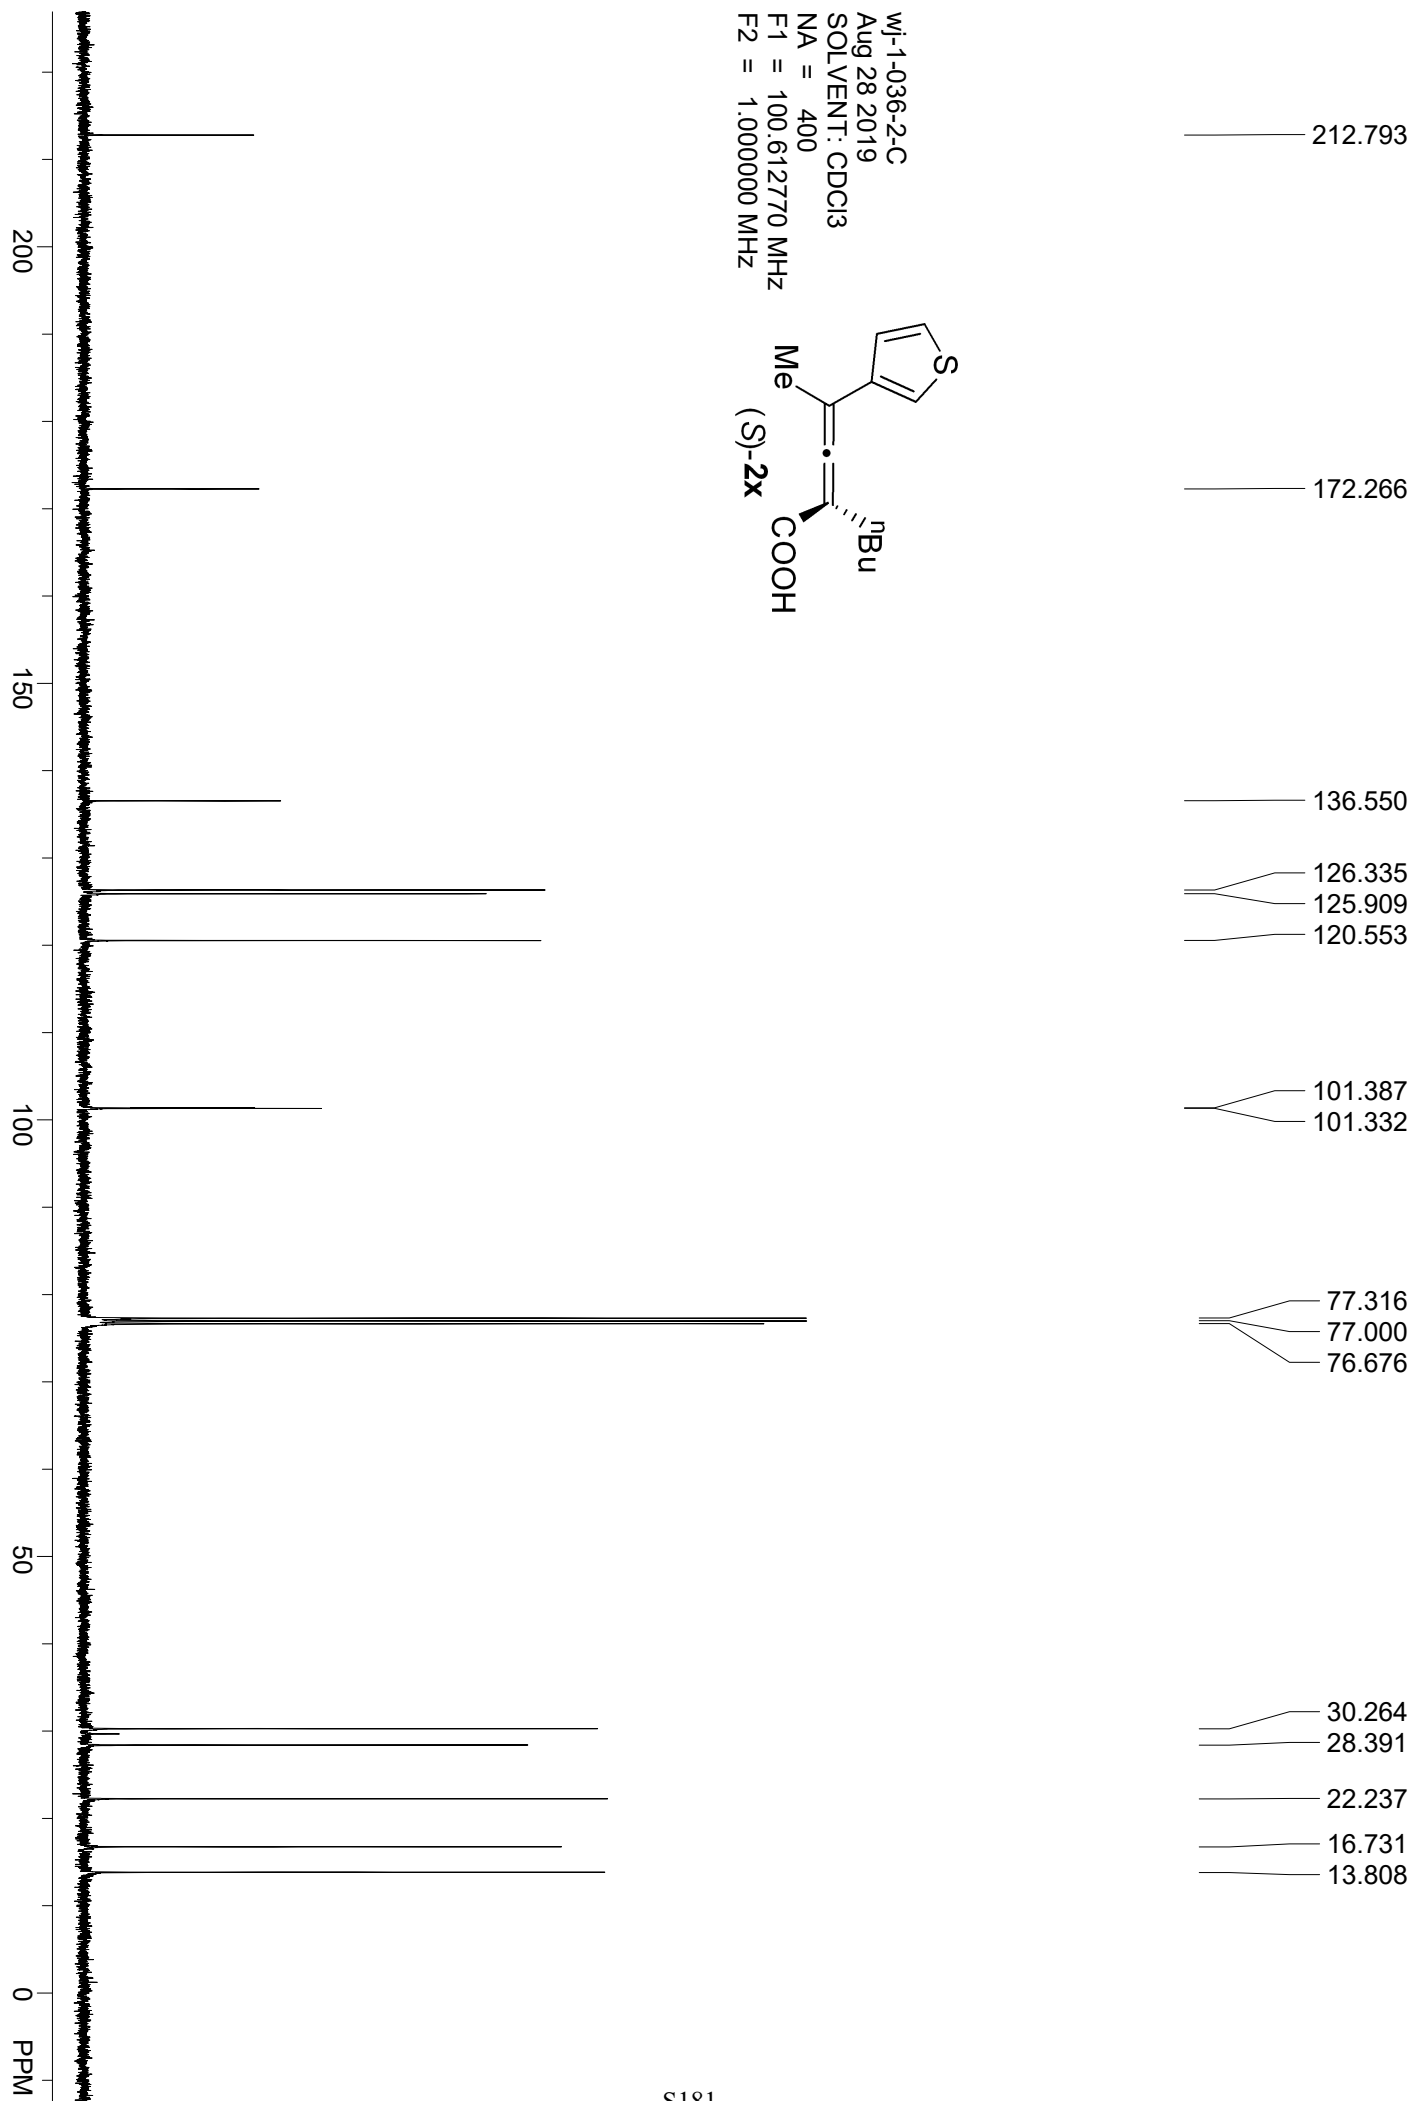

# Area Percent Report



sample wj-1-036-2-AS-H-98-2-1.0-214

Data file: C:\Users\Public\Documents\ChemStation\1\Data\WJ\_LC 2019-08-31 15-28-15\007-P2-C4-wj-1-036-2.D

## Acquisition Data:

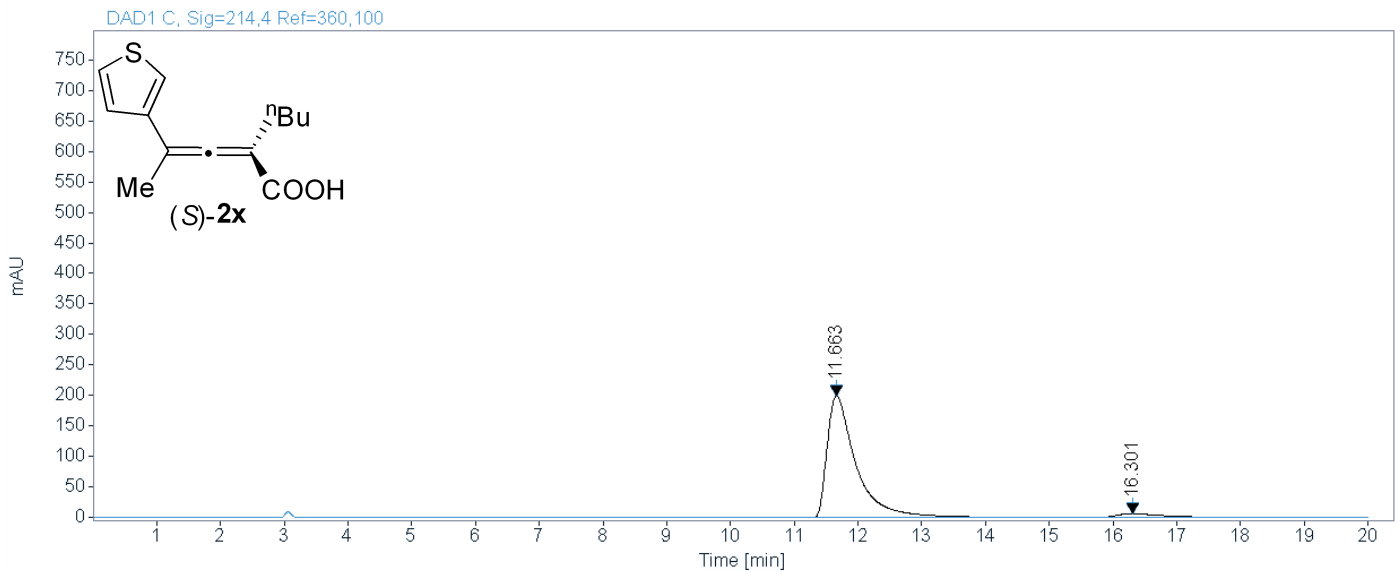

Signal: DAD1 C, Sig=214,4 Ref=360,100

| RT [min] | Width [min] | Height   | Area      | Area%    |
|----------|-------------|----------|-----------|----------|
| 11.663   | 0.5359      | 200.1053 | 6433.8291 | 95.7610  |
| 16.301   | 0.7643      | 6.2105   | 284.8026  | 4.2390   |
| Sum      |             |          | 6718.6317 | 100.0000 |

# Area Percent Report



Agilent Technologies

sample wj-1-036-2-rac-AS-H-98-2-1.0-214

Data file: C:\Users\Public\Documents\ChemStation\1\Data\WJ\_LC 2019-08-31 15-28-15\008-P2-C5-wj-1-036-2-rac.D

## Acquisition Data:

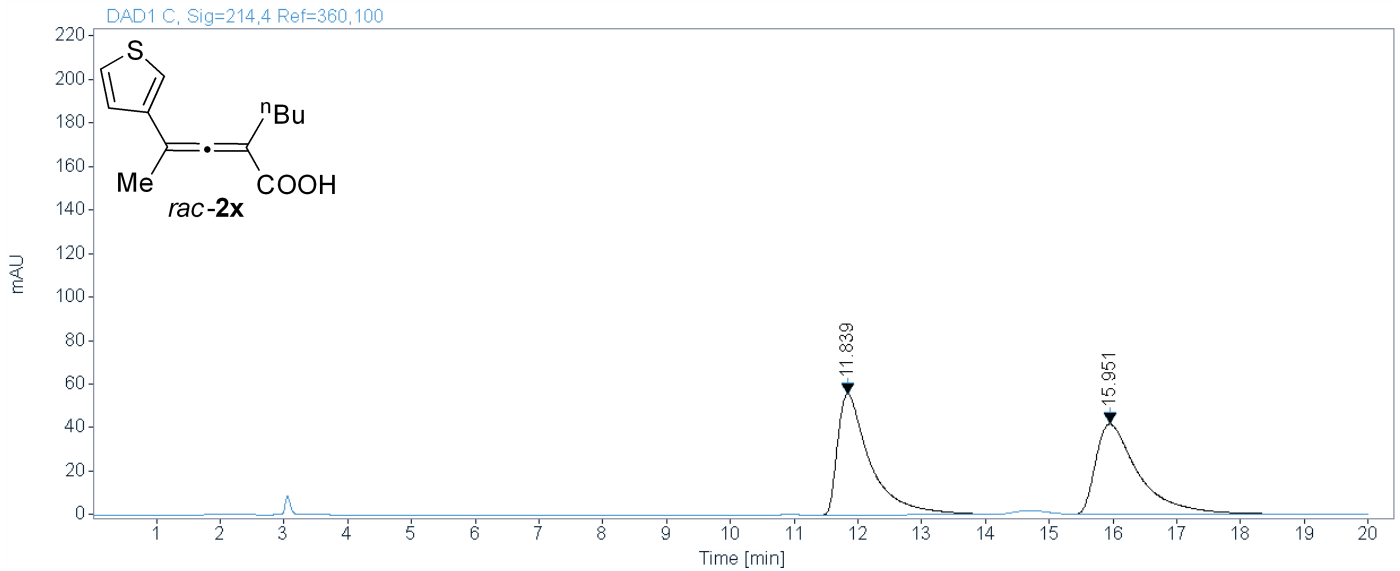

Signal: DAD1 C, Sig=214,4 Ref=360,100

| RT [min] | Width [min] | Height  | Area      | Area%    |
|----------|-------------|---------|-----------|----------|
| 11.839   | 0.5186      | 55.6528 | 1977.6501 | 50.1687  |
| 15.951   | 0.7023      | 41.4911 | 1964.3499 | 49.8313  |
|          | Sum         |         | 3942.0000 | 100.0000 |

wj-1-050-2-H  
 Sep 11 2019  
 SOLVENT: CDCl3  
 NA = 4  
 F1 = 400.130005 MHz  
 F2 = 1.000000 MHz

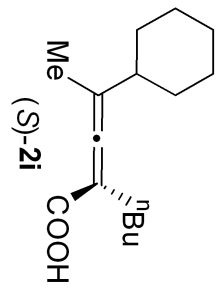

7.263

- 2.227
- 2.206
- 2.189
- 2.170
- 2.160
- 2.140
- 2.123
- 1.904
- 1.895
- 1.870
- 1.853
- 1.838
- 1.773
- 1.736
- 1.671
- 1.641
- 1.422
- 1.411
- 1.395
- 1.379
- 1.367
- 1.354
- 1.336
- 1.318
- 1.292
- 1.259
- 1.223
- 1.186
- 1.148
- 1.120
- 1.088
- 1.056
- 0.920
- 0.902
- 0.885
- 0.000

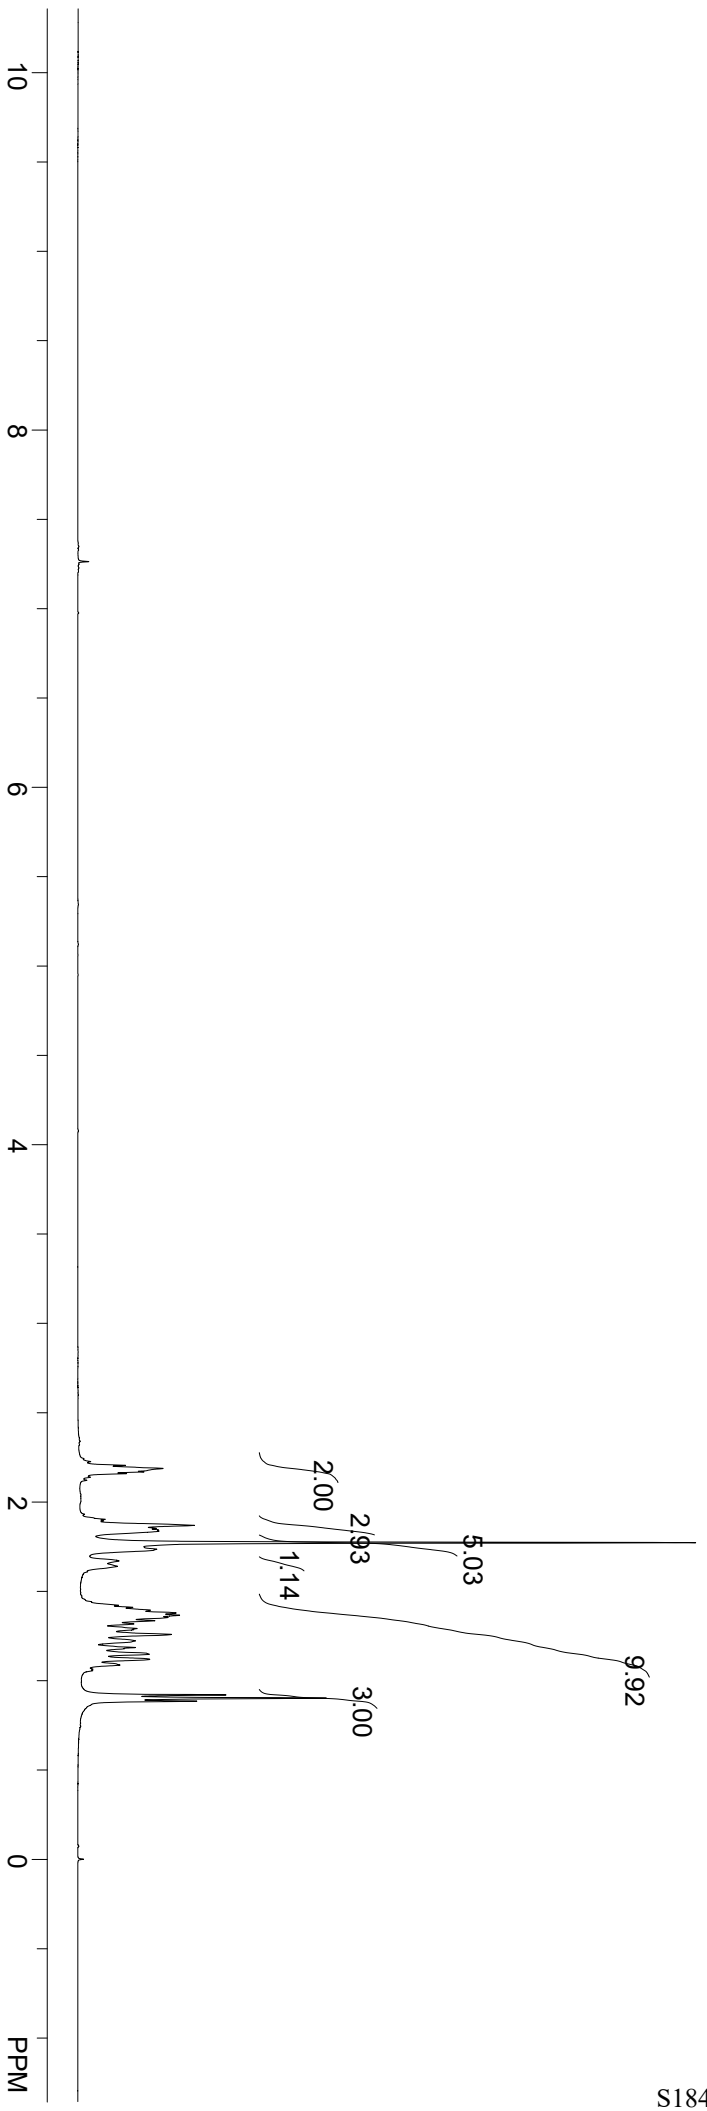



wj-1-050-2-C  
Sep 11 2019  
SOLVENT: CDCl3  
NA = 200  
F1 = 100.623833 MHz  
F2 = 1.000000 MHz

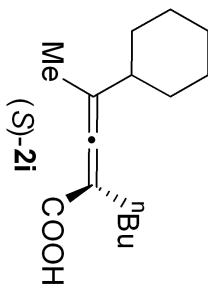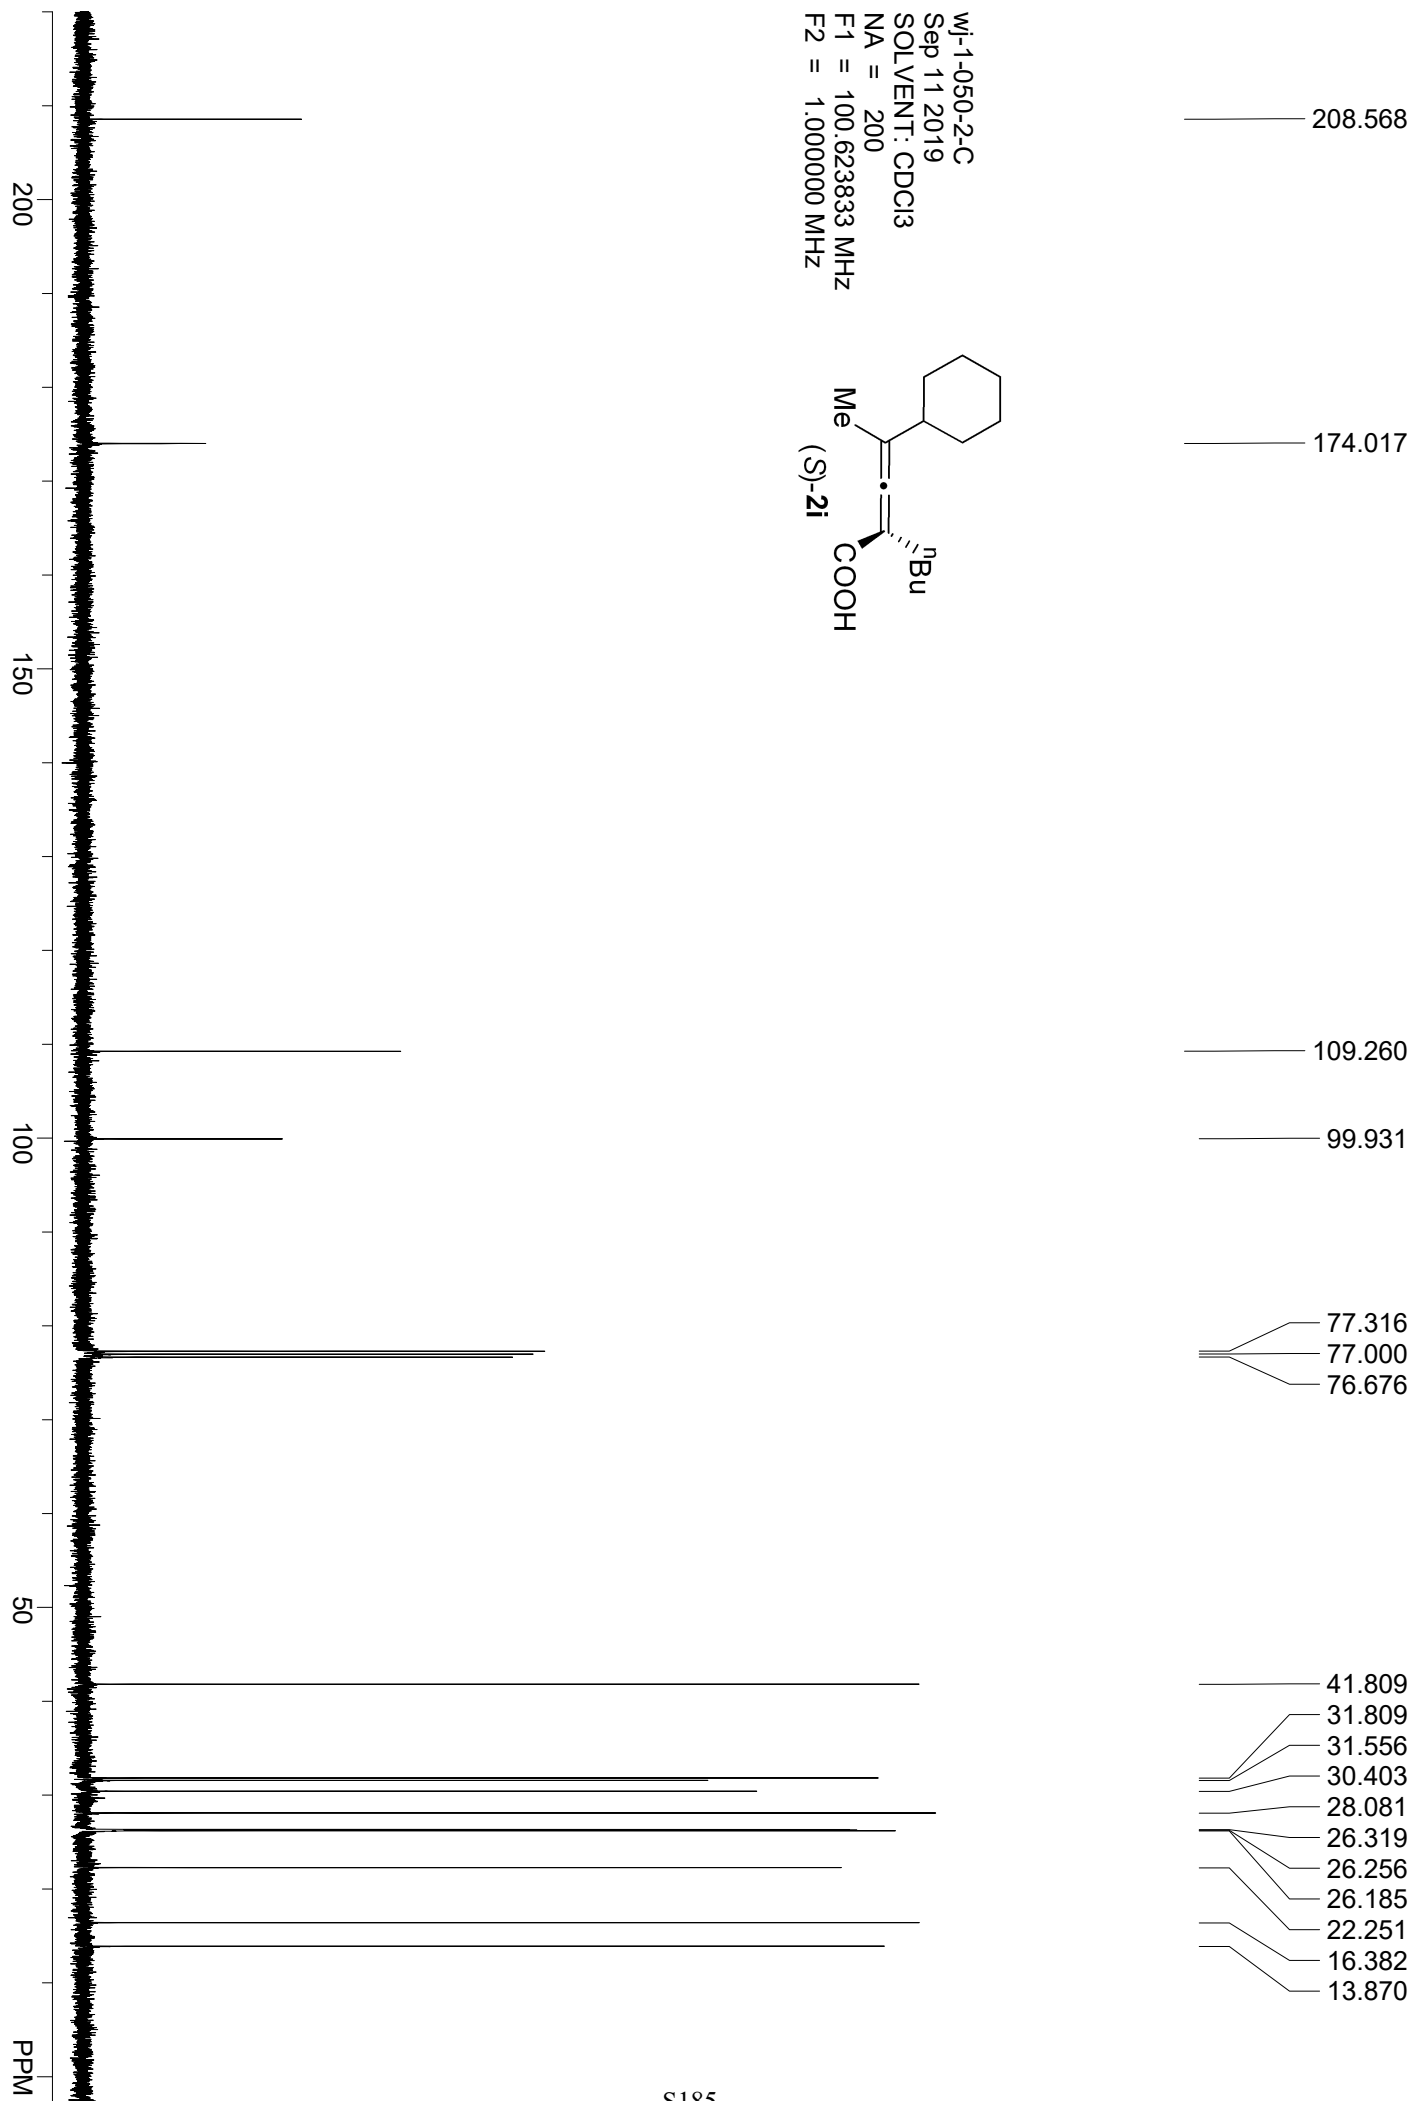

# Area Percent Report



Agilent Technologies

sample wj-1-050-2-AS-H-98-2-1.0-214

Data file: C:\Users\Public\Documents\ChemStation\1\Data\zwf-allenioc acid\_LC 2019-09-11 17-12-23\012-P2-C3-wj-1-050-2.D

## Acquisition Data:

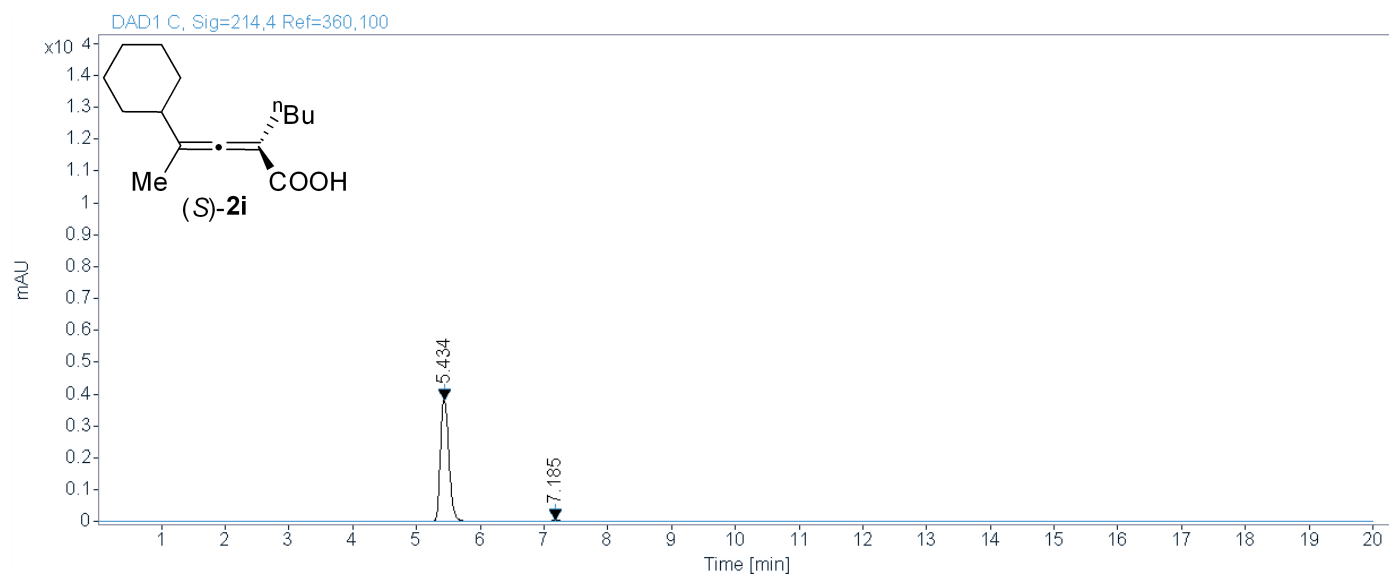

Signal: DAD1 C, Sig=214,4 Ref=360,100

| RT [min] | Width [min] | Height    | Area       | Area%    |
|----------|-------------|-----------|------------|----------|
| 5.434    | 0.1454      | 3825.0781 | 35883.6367 | 98.5244  |
| 7.185    | 0.2418      | 37.0453   | 537.4363   | 1.4756   |
|          |             | Sum       | 36421.0730 | 100.0000 |

# Area Percent Report



Agilent Technologies

sample wj-1-050-2-rac-AS-H-98-2-1.0-214

Data file: C:\Users\Public\Documents\ChemStation\1\Data\zwf-allenioc acid\_LC 2019-09-11 17-12-23\013-P2-C4-wj-1-050-2-rac.D

## Acquisition Data:

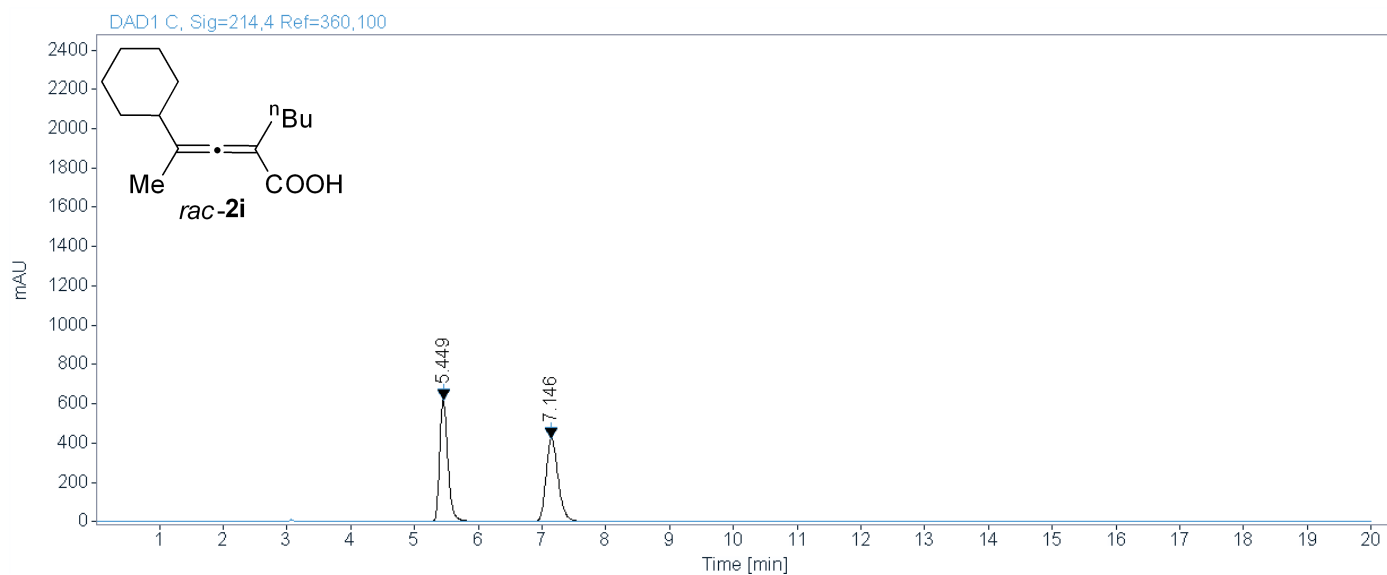

Signal: DAD1 C, Sig=214,4 Ref=360,100

| RT [min] | Width [min] | Height   | Area       | Area%    |
|----------|-------------|----------|------------|----------|
| 5.449    | 0.1365      | 619.4649 | 5548.2568  | 49.8322  |
| 7.146    | 0.2035      | 424.4063 | 5585.6196  | 50.1678  |
| Sum      |             |          | 11133.8765 | 100.0000 |

wj-1-055-2-H  
Sep 16 2019  
SOLVENT: CDCl3  
NA = 4  
F1 = 400.130005 MHz  
F2 = 1.000000 MHz

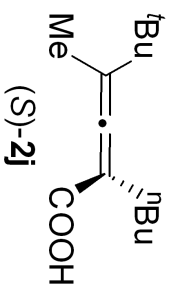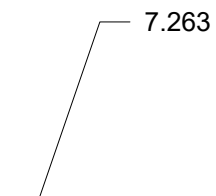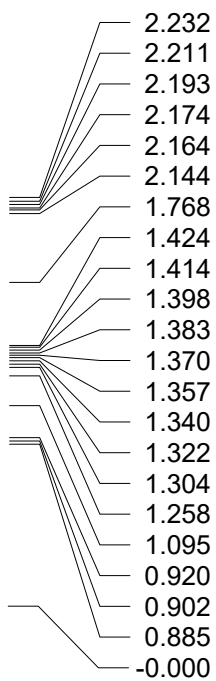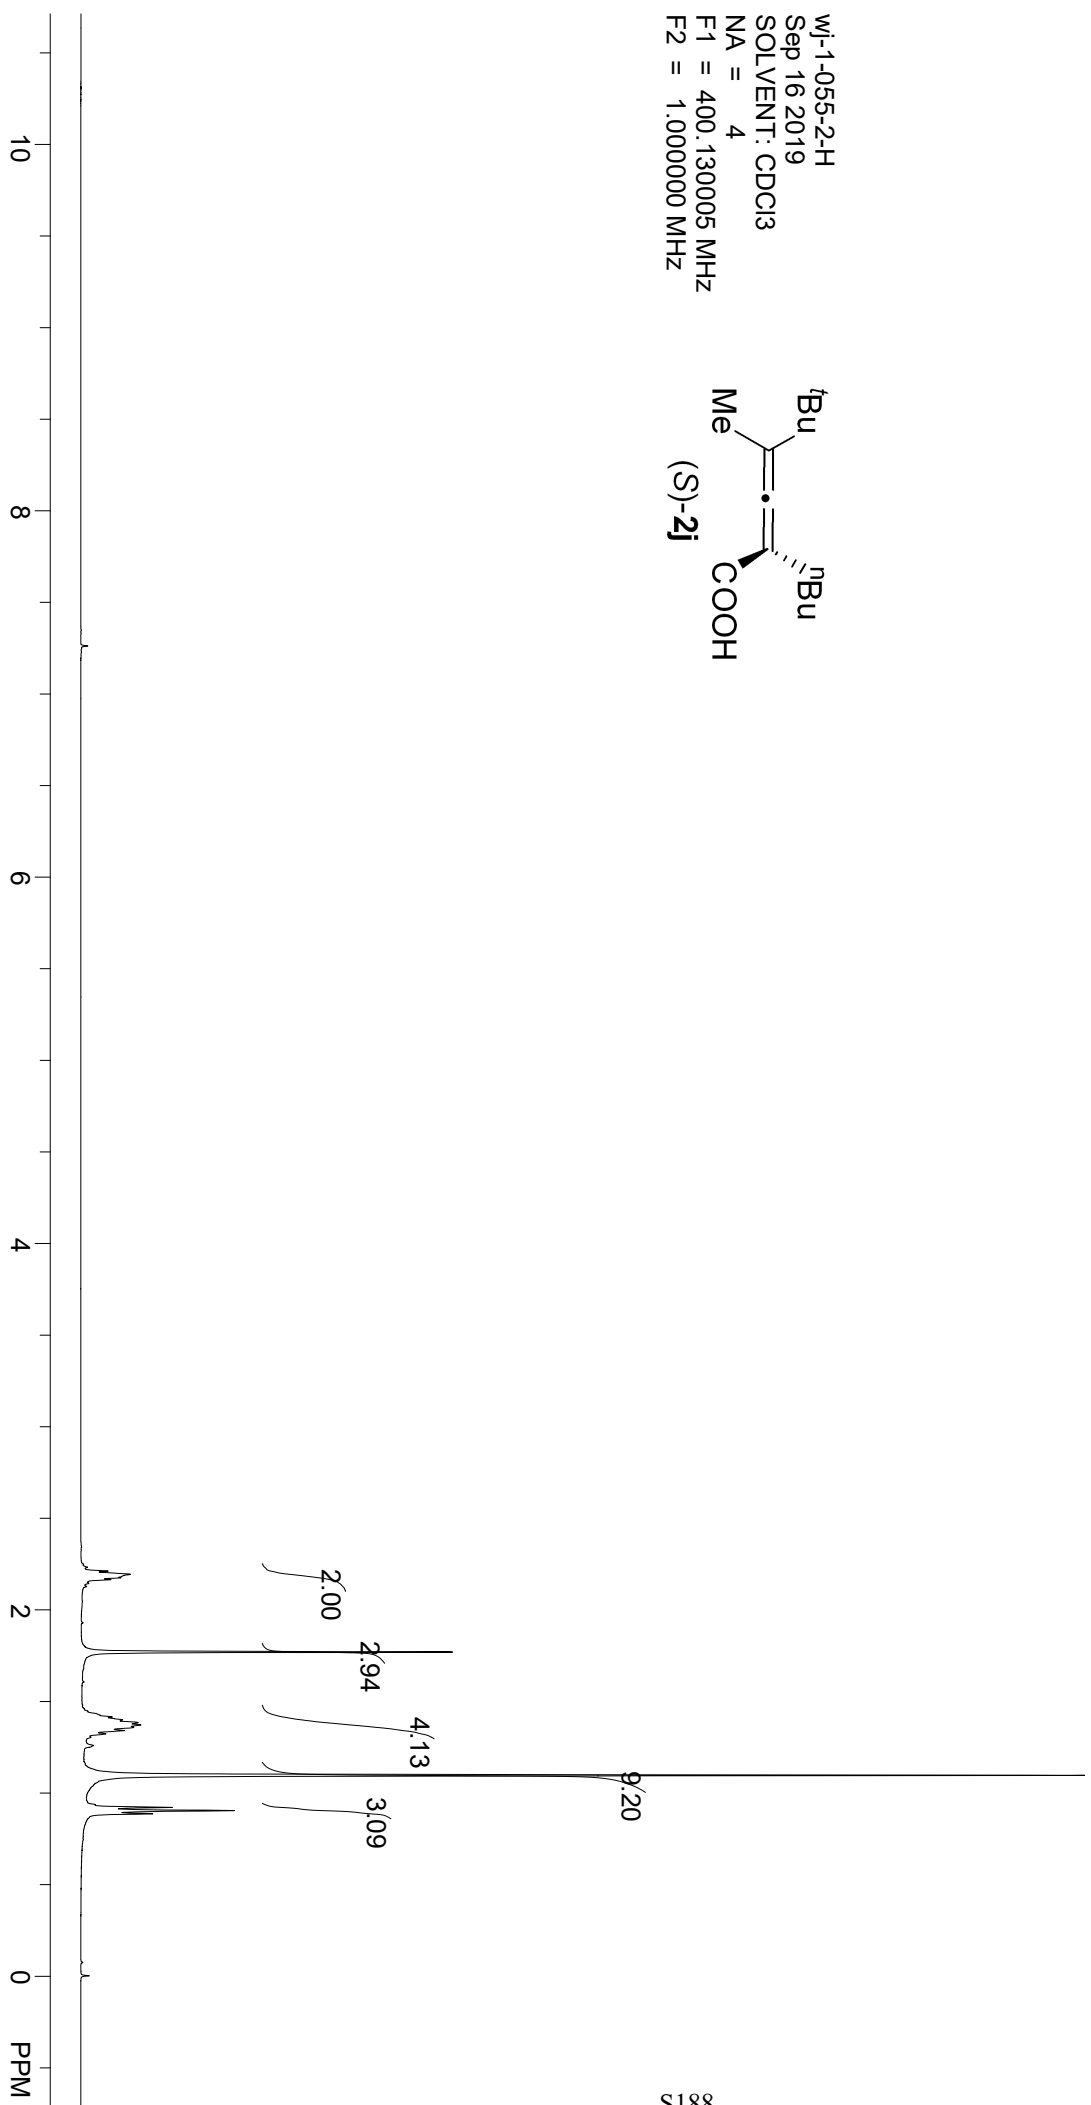

WJ-1-055-2-C  
Sep 16 2019  
SOLVENT: CDCl3  
NA = 128  
F1 = 100.612770 MHz  
F2 = 1.000000 MHz

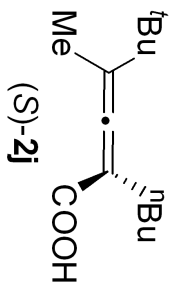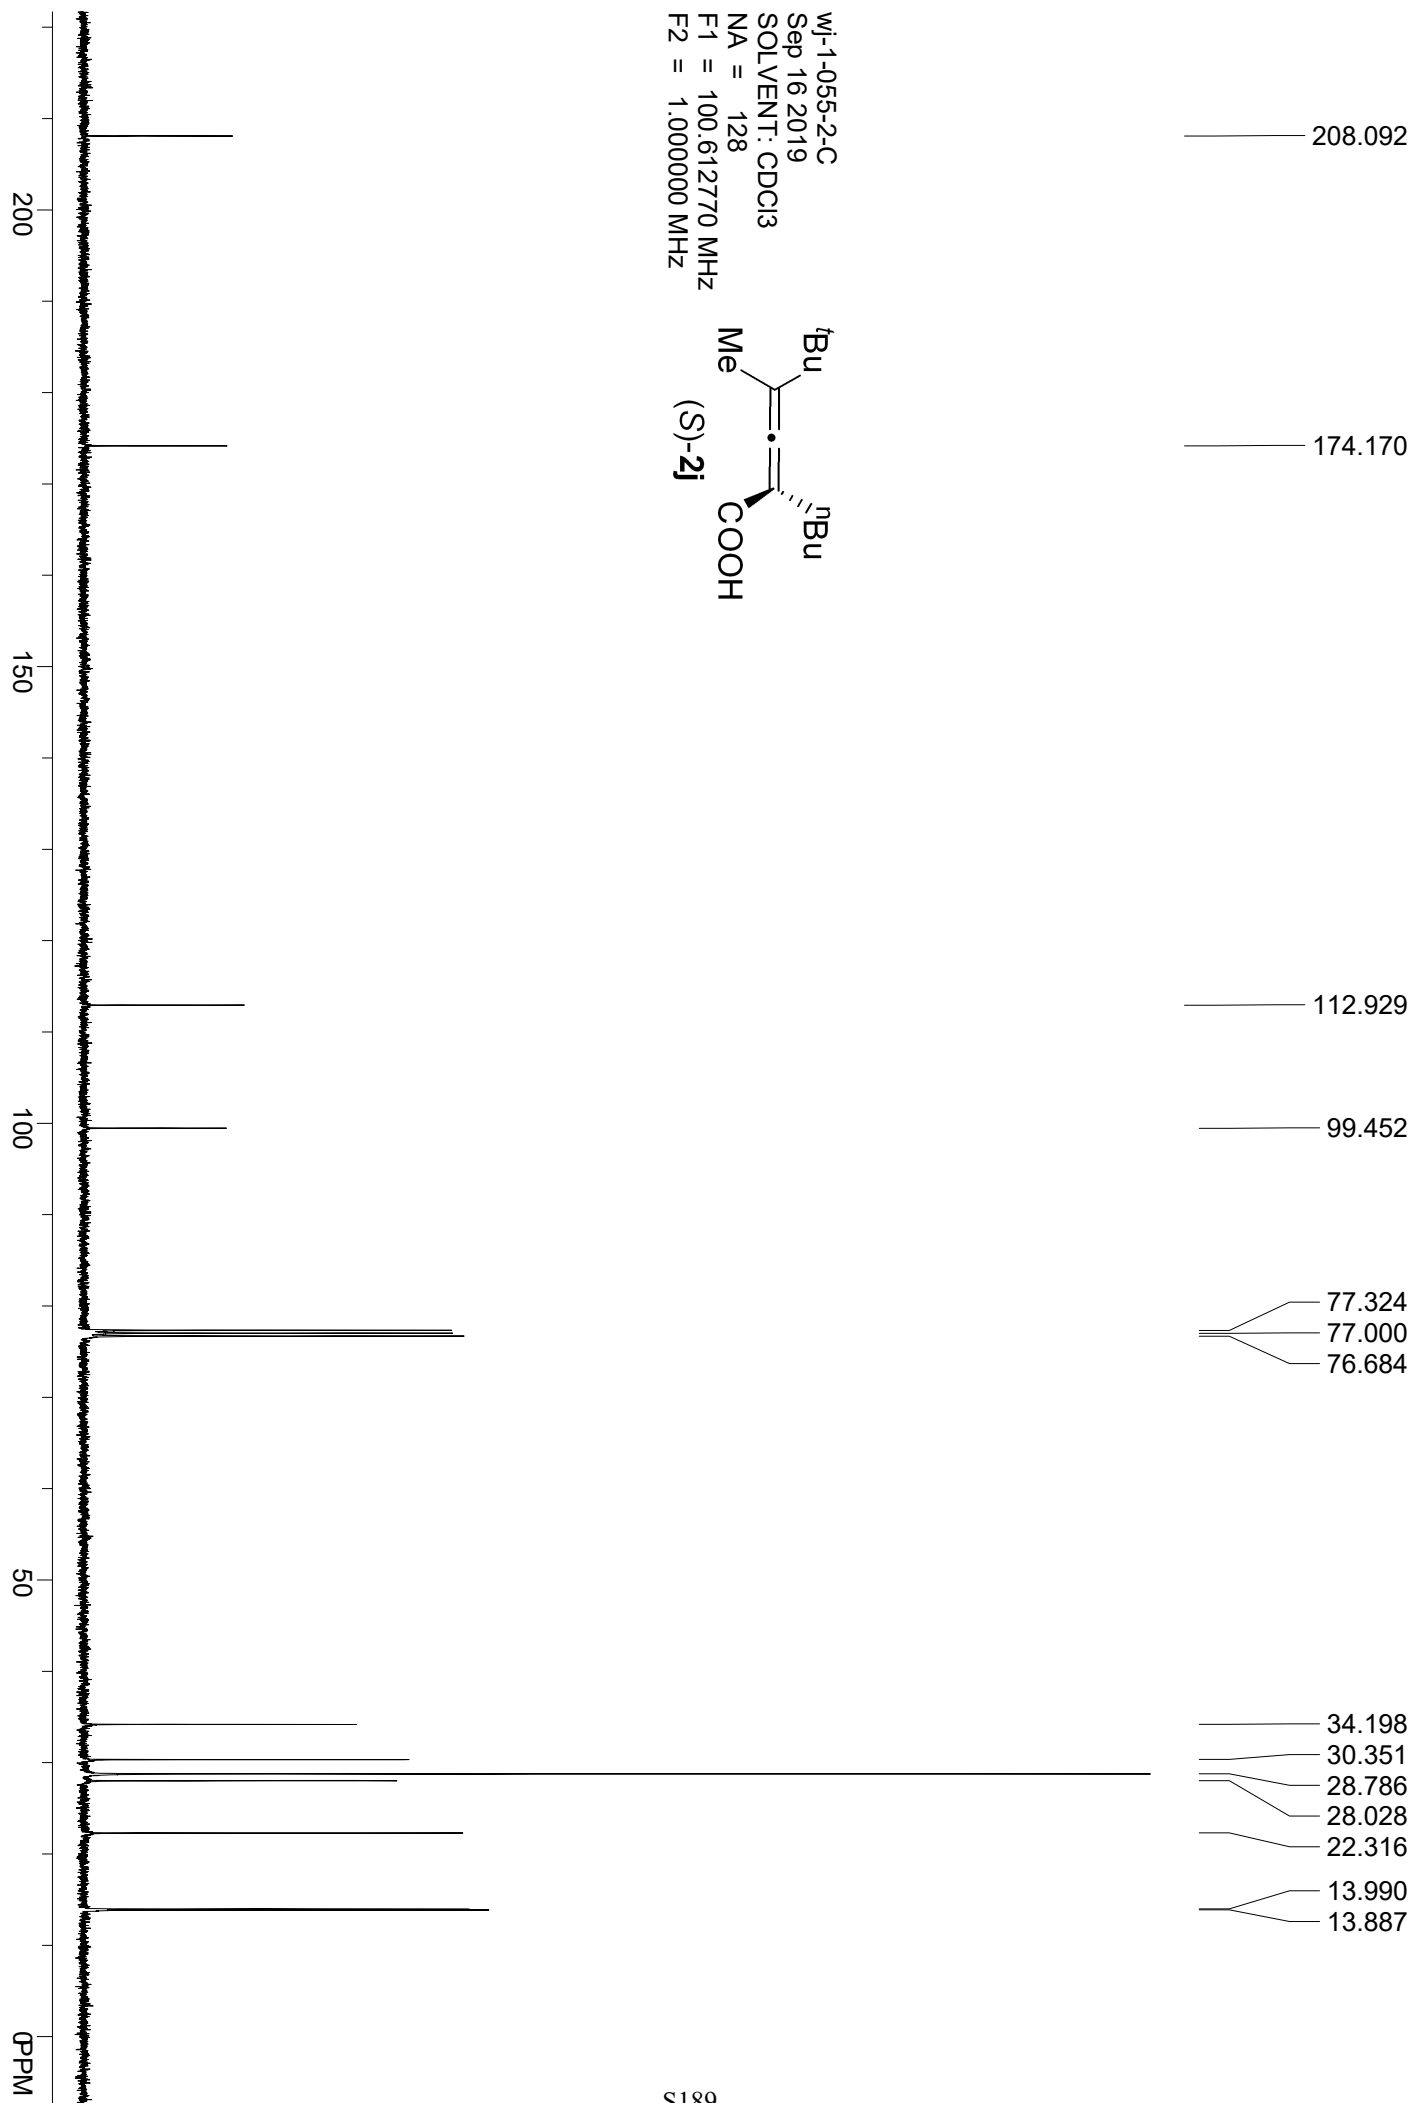

# Area Percent Report



sample wj-1-055-2-AD-H-98-2-1.0-214

Data file: C:\Users\Public\Documents\ChemStation\1\Data\wgl 2019-09-17 09-02-49\034-P2-C7-wj-1-055-2.D

## Acquisition Data:

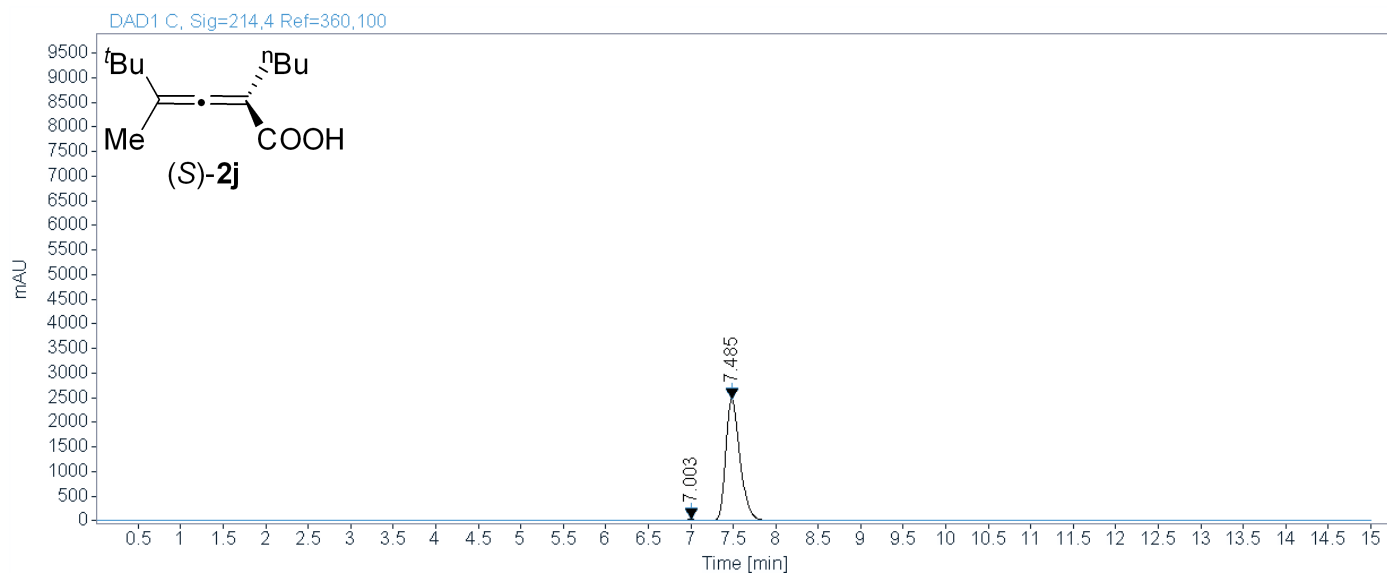

Signal: DAD1 C, Sig=214,4 Ref=360,100

| RT [min] | Width [min] | Height    | Area       | Area%    |
|----------|-------------|-----------|------------|----------|
| 7.003    | 0.1652      | 22.3828   | 240.1547   | 0.8288   |
| 7.485    | 0.1773      | 2475.7034 | 28737.6777 | 99.1712  |
|          | Sum         |           | 28977.8324 | 100.0000 |

# Area Percent Report



sample wj-1-055-2-rac-AD-H-98-2-1.0-214

Data file: C:\Users\Public\Documents\ChemStation\1\Data\wgl 2019-09-17 09-02-49\035-P2-C8-wj-1-055-2-rac.D

## Acquisition Data:

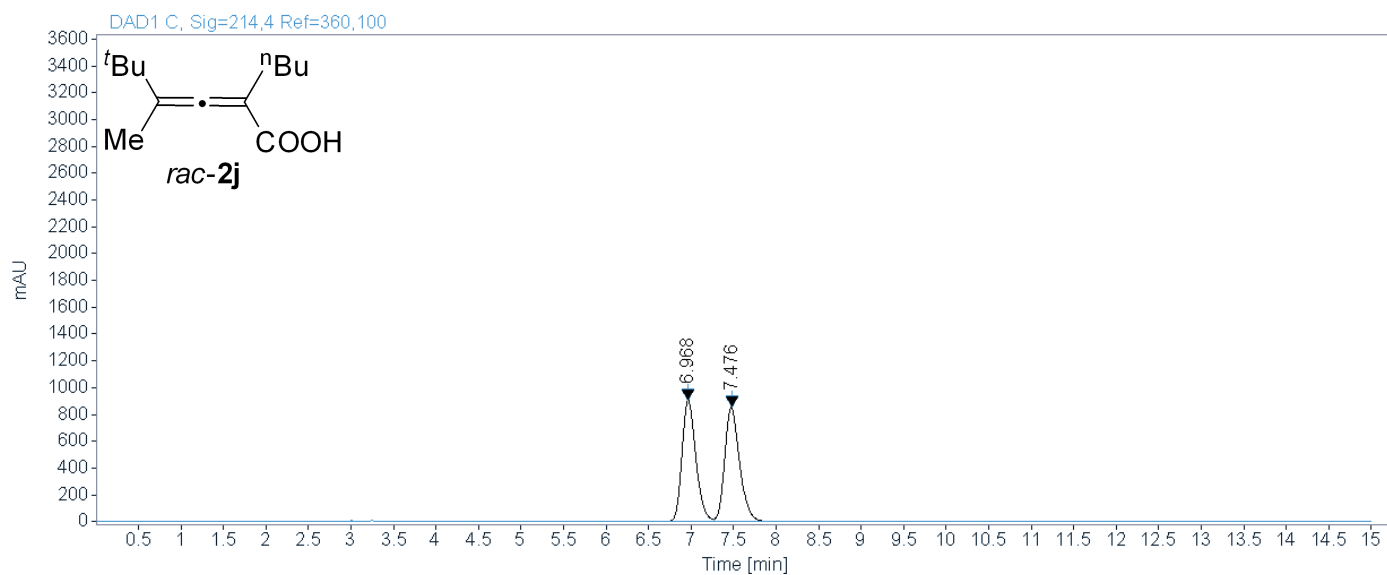

Signal: DAD1 C, Sig=214,4 Ref=360,100

| RT [min] | Width [min] | Height   | Area       | Area%    |
|----------|-------------|----------|------------|----------|
| 6.968    | 0.1743      | 907.0036 | 10285.4258 | 49.8380  |
| 7.476    | 0.1880      | 850.8357 | 10352.2822 | 50.1620  |
| Sum      |             |          | 20637.7080 | 100.0000 |

WJ-1-046-2-H  
Sep 07 2019  
SOLVENT: CDCl3  
NA = 4  
F1 = 400.130005 MHz  
F2 = 1.000000 MHz

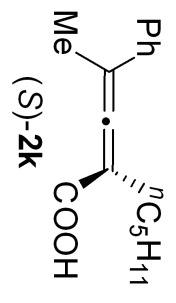

- 7.397
- 7.379
- 7.367
- 7.349
- 7.329
- 7.278
- 7.261
- 7.244

- 2.343
- 2.324
- 2.305
- 2.202

- 1.516
- 1.497
- 1.480
- 1.461
- 1.444
- 1.303
- 1.294
- 1.286
- 1.277
- 1.254
- 0.859
- 0.842
- 0.825
- 0.000

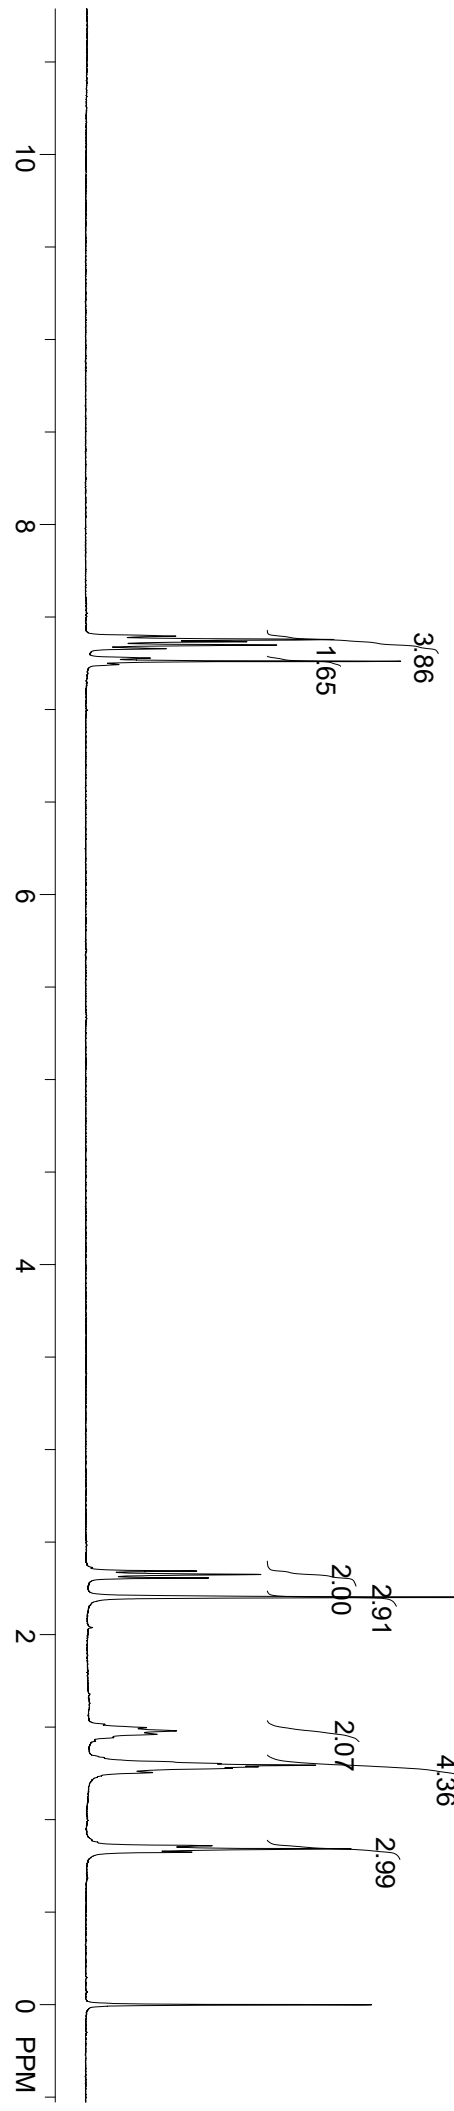



WJ-1-046-2-C  
Sep 07 2019  
SOLVENT: CDCl3  
NA = 250  
F1 = 100.612770 MHz  
F2 = 1.000000 MHz

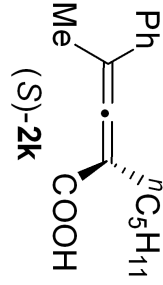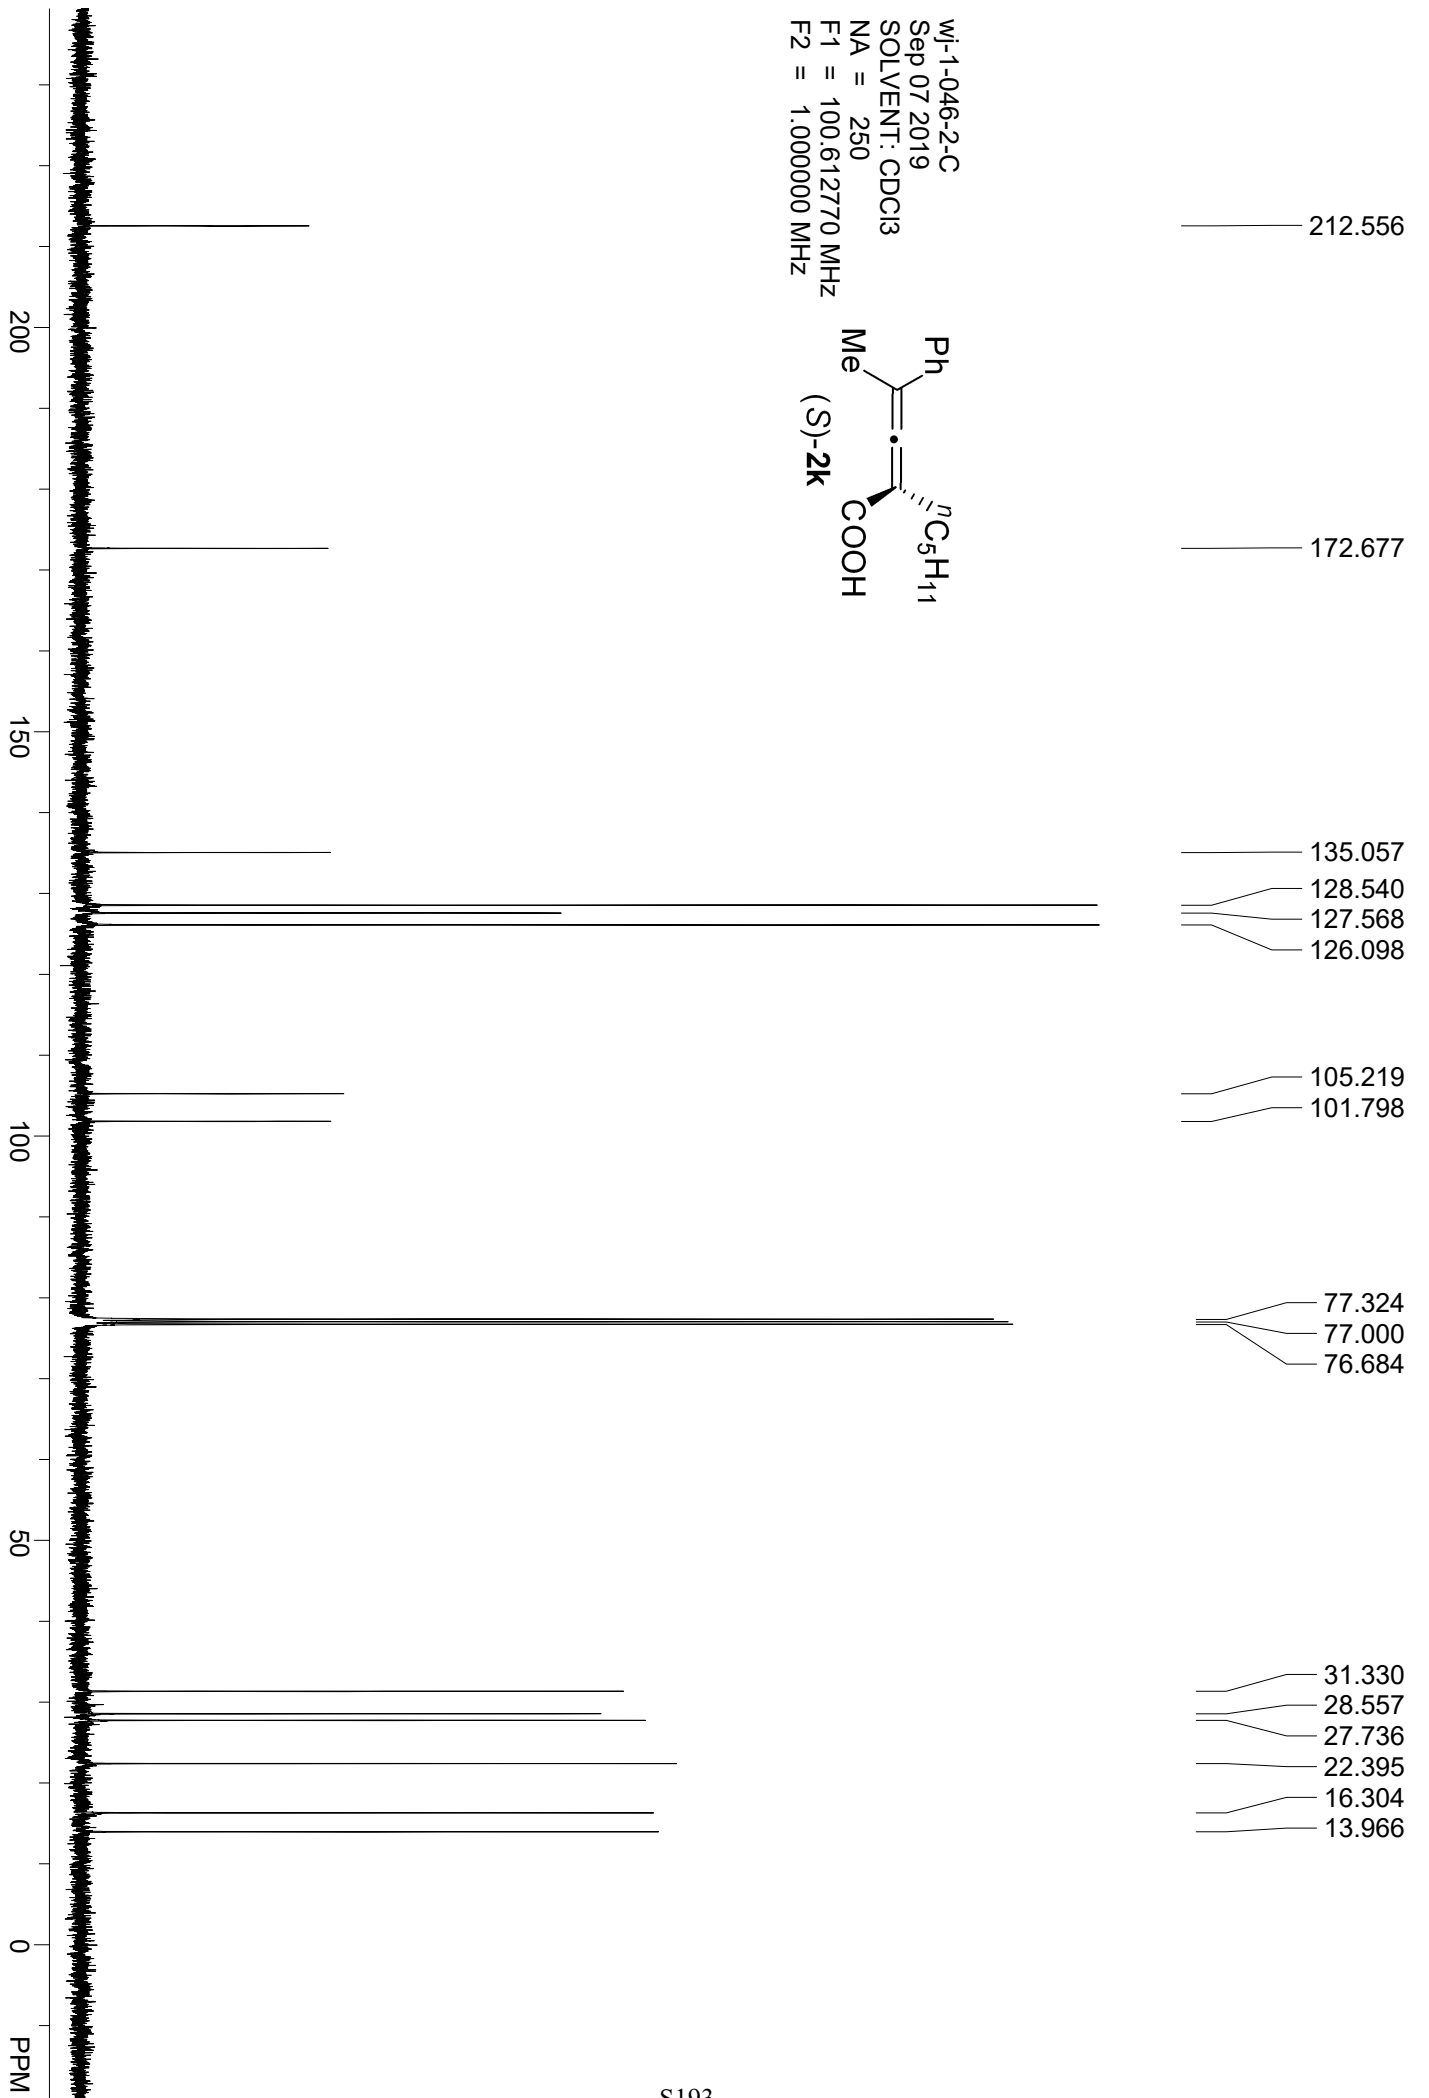

# Area Percent Report



sample wj-1-046-2-AS-H-98-2-1.0-214

Data file: C:\Users\Public\Documents\ChemStation\1\Data\zwf-allenioc acid\_LC 2019-09-09 16-35-10\031-P2-C3-wj-1-046-2.D

## Acquisition Data:

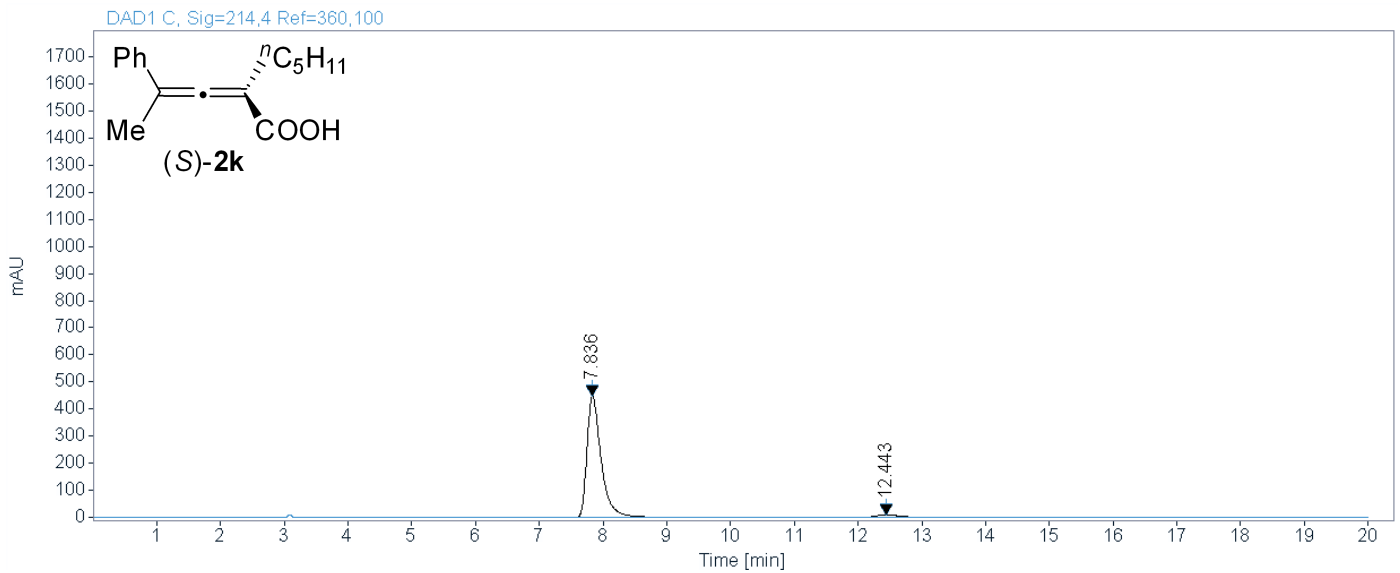

Signal: DAD1 C, Sig=214,4 Ref=360,100

| RT [min] | Width [min] | Height   | Area      | Area%    |
|----------|-------------|----------|-----------|----------|
| 7.836    | 0.2358      | 449.1552 | 7014.2578 | 95.4400  |
| 12.443   | 0.4584      | 10.8478  | 335.1310  | 4.5600   |
| Sum      |             |          | 7349.3888 | 100.0000 |

# Area Percent Report



Agilent Technologies

sample wj-1-046-2-rac-AS-H-98-2-1.0-214

Data file: C:\Users\Public\Documents\ChemStation\1\Data\zwf-allenioc acid\_LC 2019-09-09 16-35-10\032-P2-C4-wj-1-046-2-rac.D

## Acquisition Data:

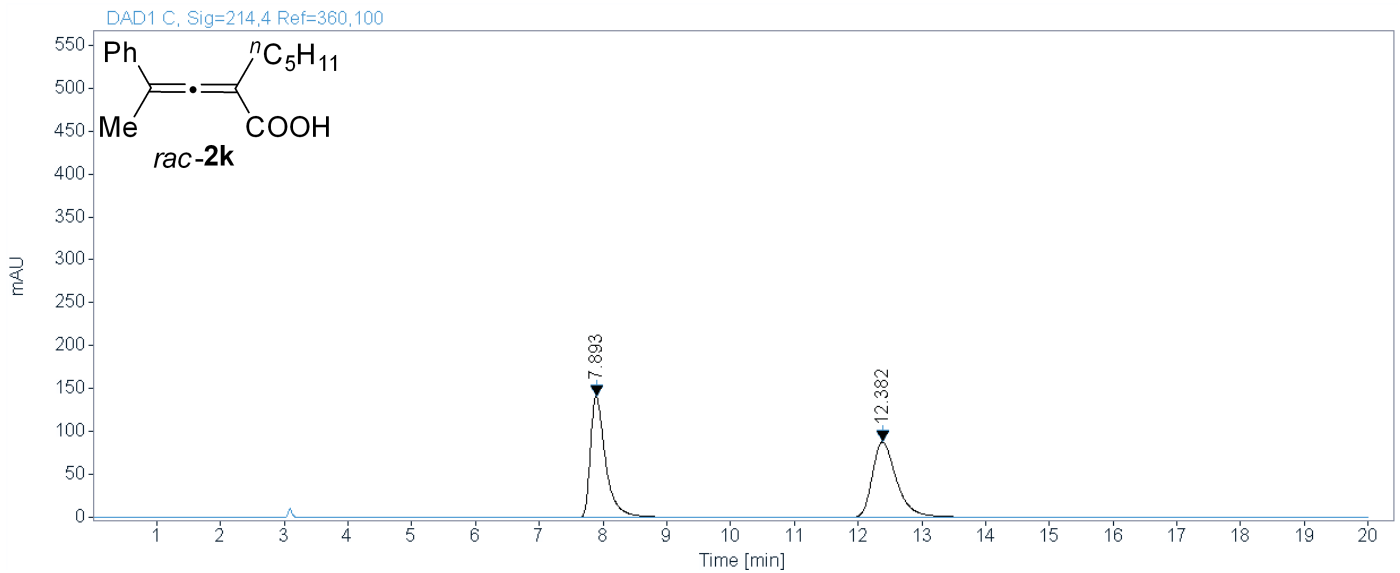

Signal: DAD1 C, Sig=214,4 Ref=360,100

| RT [min] | Width [min] | Height   | Area      | Area%    |
|----------|-------------|----------|-----------|----------|
| 7.893    | 0.2465      | 141.8907 | 2340.6135 | 50.0324  |
| 12.382   | 0.4040      | 87.9829  | 2337.5791 | 49.9676  |
|          |             | Sum      | 4678.1926 | 100.0000 |

wj-1-094-2-H  
Oct 28 2019  
SOLVENT: CDCl3  
NA = 4  
F1 = 400.130005 MHz  
F2 = 1.000000 MHz

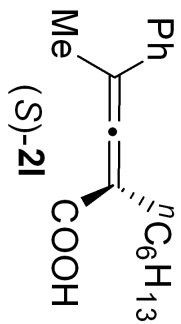

7.390  
7.372  
7.356  
7.338  
7.319  
7.268  
7.250  
7.233

2.337  
2.319  
2.300  
2.192

1.506  
1.489  
1.471  
1.452  
1.433  
1.326  
1.312  
1.291  
1.274  
1.253  
1.243  
1.237  
0.857  
0.841  
0.824  
0.000

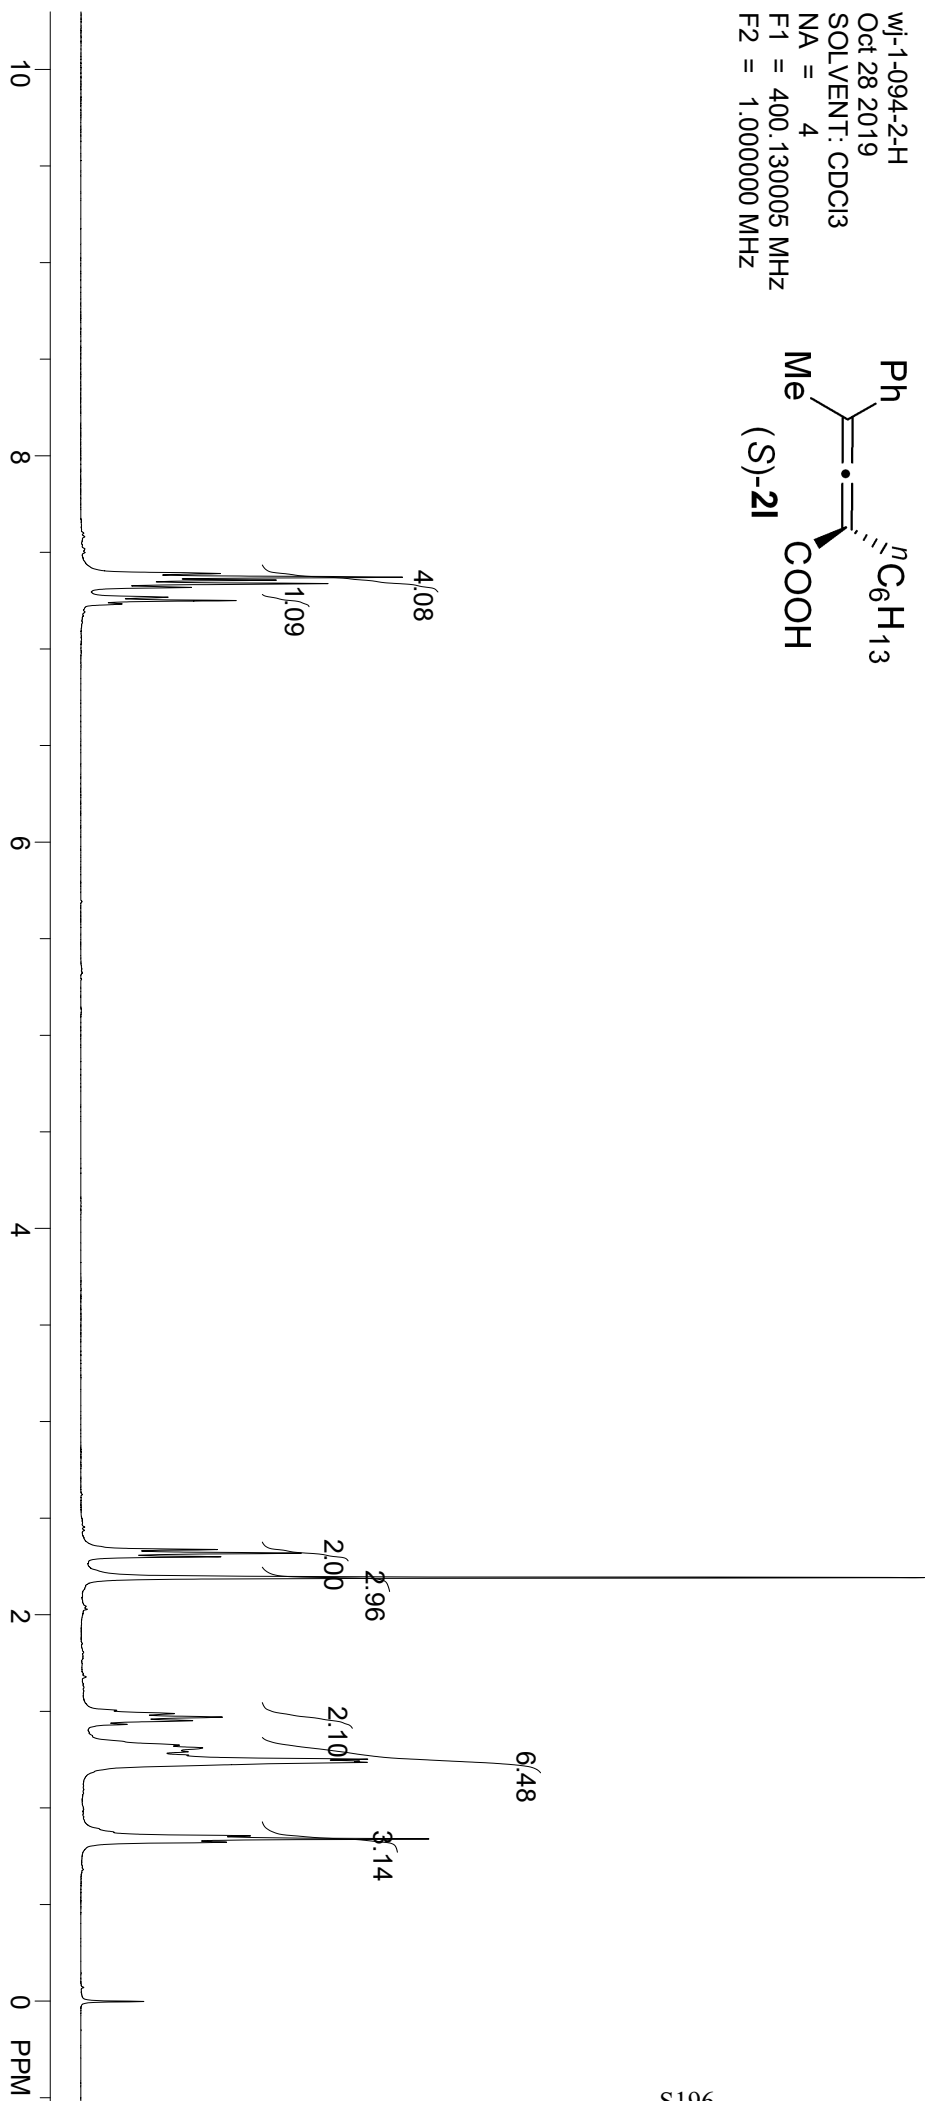

212.524

172.519

135.025

128.547

127.584

126.091

105.227

101.774

77.324

77.000

76.684

31.599

28.842

28.605

28.028

22.593

16.320

14.013

wf-1-094-2-C  
Oct 27 2019  
SOLVENT: CDCl3  
NA = 512  
F1 = 100.612770 MHz  
F2 = 1.000000 MHz

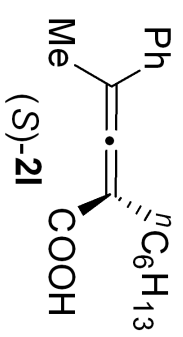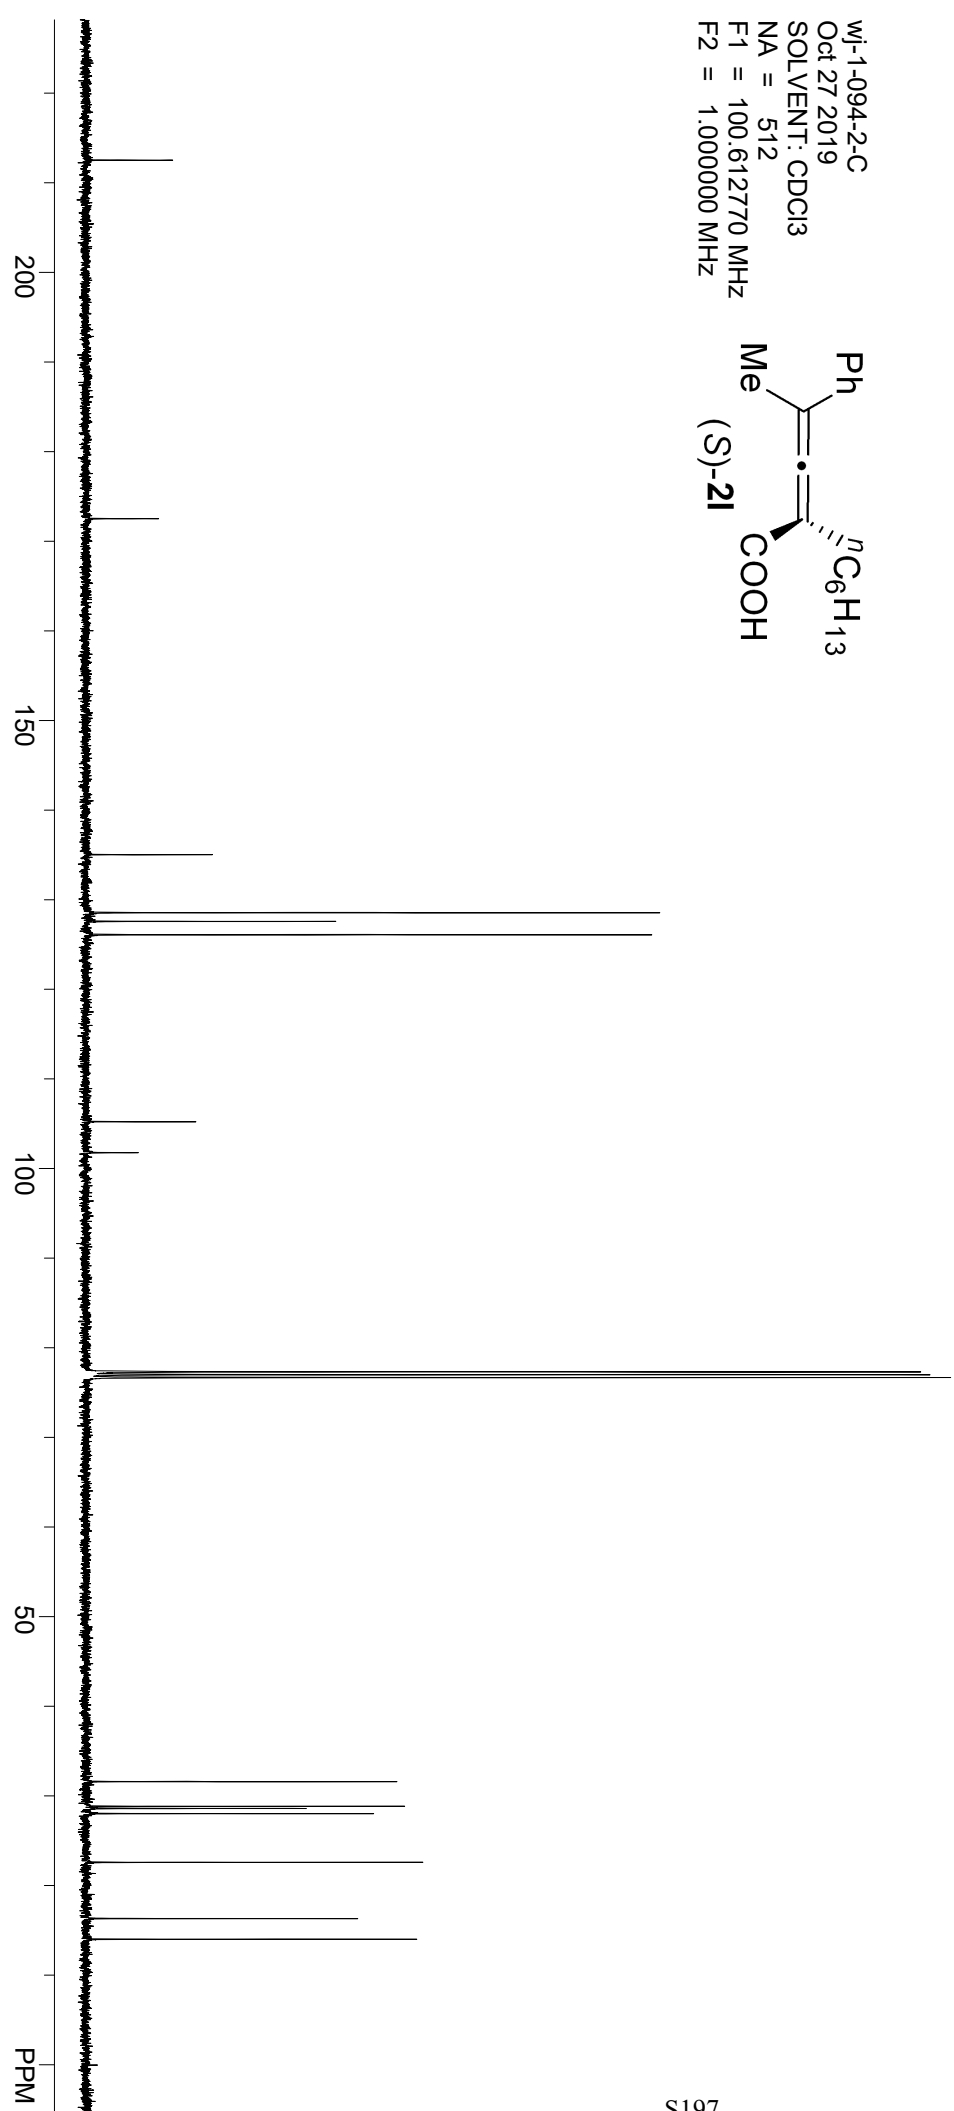

# Area Percent Report



Agilent Technologies

sample wj-1-094-2-AS-H-98-2-1.0-214

Data file: C:\Users\Public\Documents\ChemStation\1\Data\WJ\_LC 2019-10-26 22-43-36\003-P2-C1-wj-1-094-2.D

## Acquisition Data:

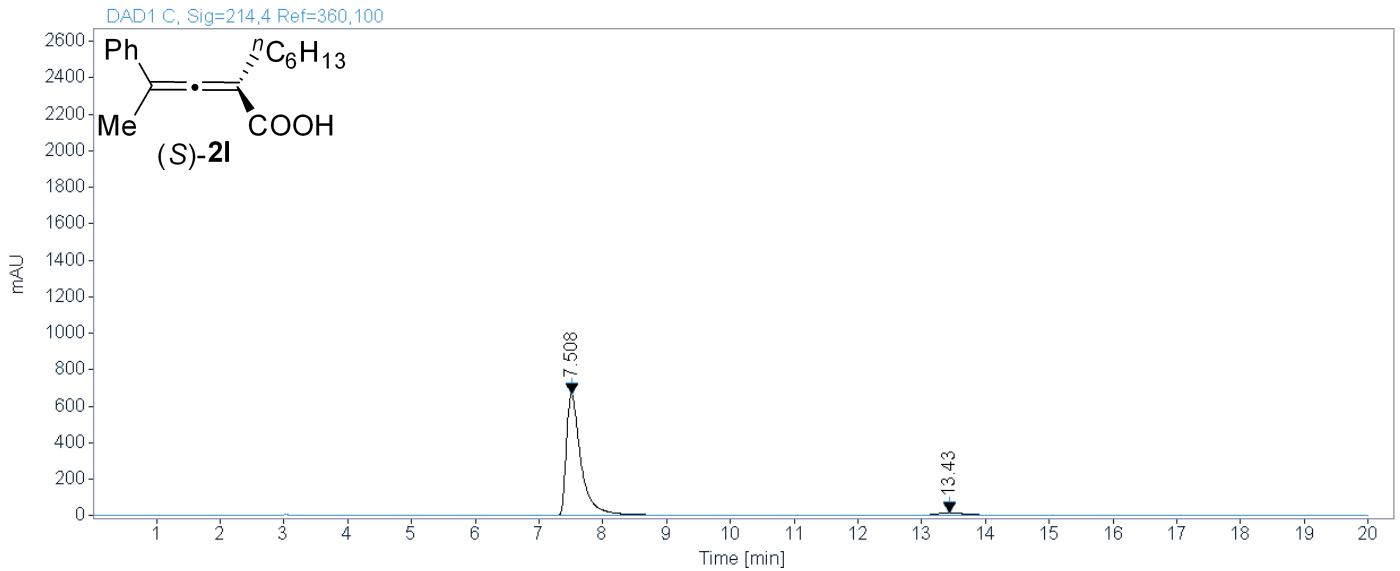

Signal: DAD1 C, Sig=214,4 Ref=360,100

| RT [min] | Width [min] | Height   | Area       | Area%    |
|----------|-------------|----------|------------|----------|
| 7.508    | 0.2425      | 667.7341 | 10924.6270 | 94.8889  |
| 13.430   | 0.6316      | 15.5273  | 588.4440   | 5.1111   |
| Sum      |             |          | 11513.0709 | 100.0000 |

# Area Percent Report



Agilent Technologies

sample wj-1-094-2-rac-AS-H-98-2-1.0-214

Data file: C:\Users\Public\Documents\ChemStation\1\Data\WJ\_LC 2019-10-26 22-43-36\004-P2-C2-wj-1-094-2-rac.D

## Acquisition Data:

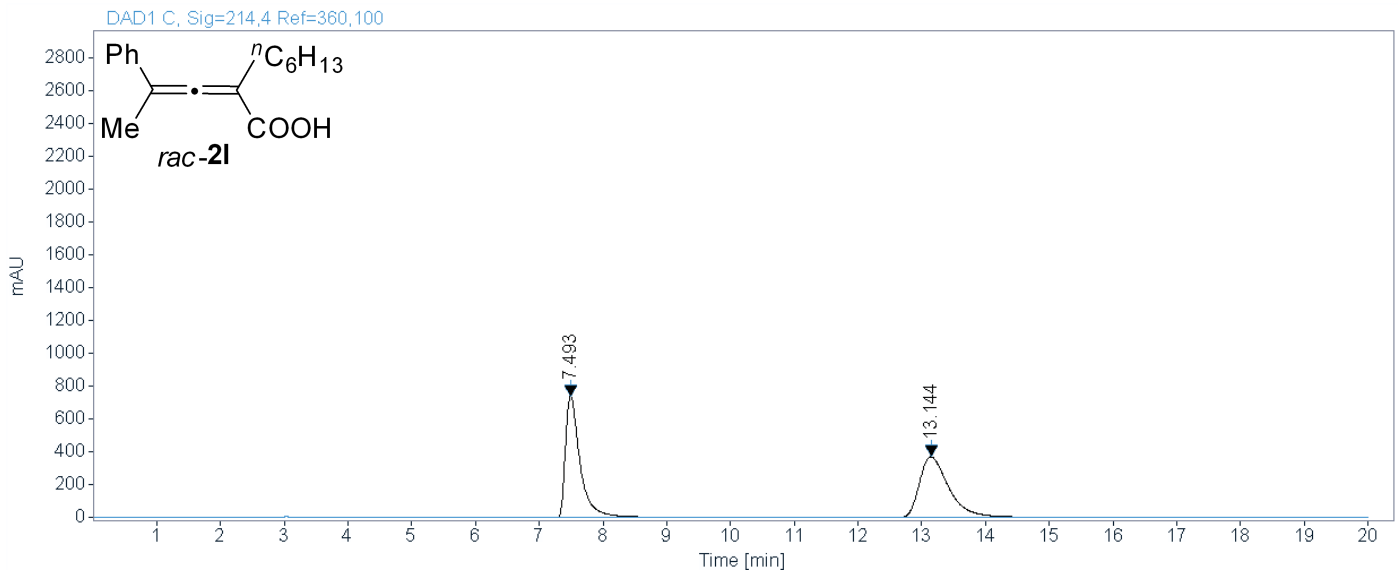

Signal: DAD1 C, Sig=214,4 Ref=360,100

| RT [min] | Width [min] | Height   | Area       | Area%    |
|----------|-------------|----------|------------|----------|
| 7.493    | 0.2413      | 742.0991 | 12042.5449 | 49.7878  |
| 13.144   | 0.4960      | 370.9405 | 12145.1973 | 50.2122  |
| Sum      |             |          | 24187.7422 | 100.0000 |

wj-1-070-2-H  
Sep 29 2019  
SOLVENT: CDCl3  
NA = 4  
F1 = 400.130005 MHz  
F2 = 1.000000 MHz

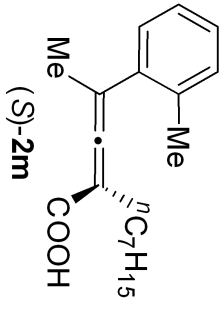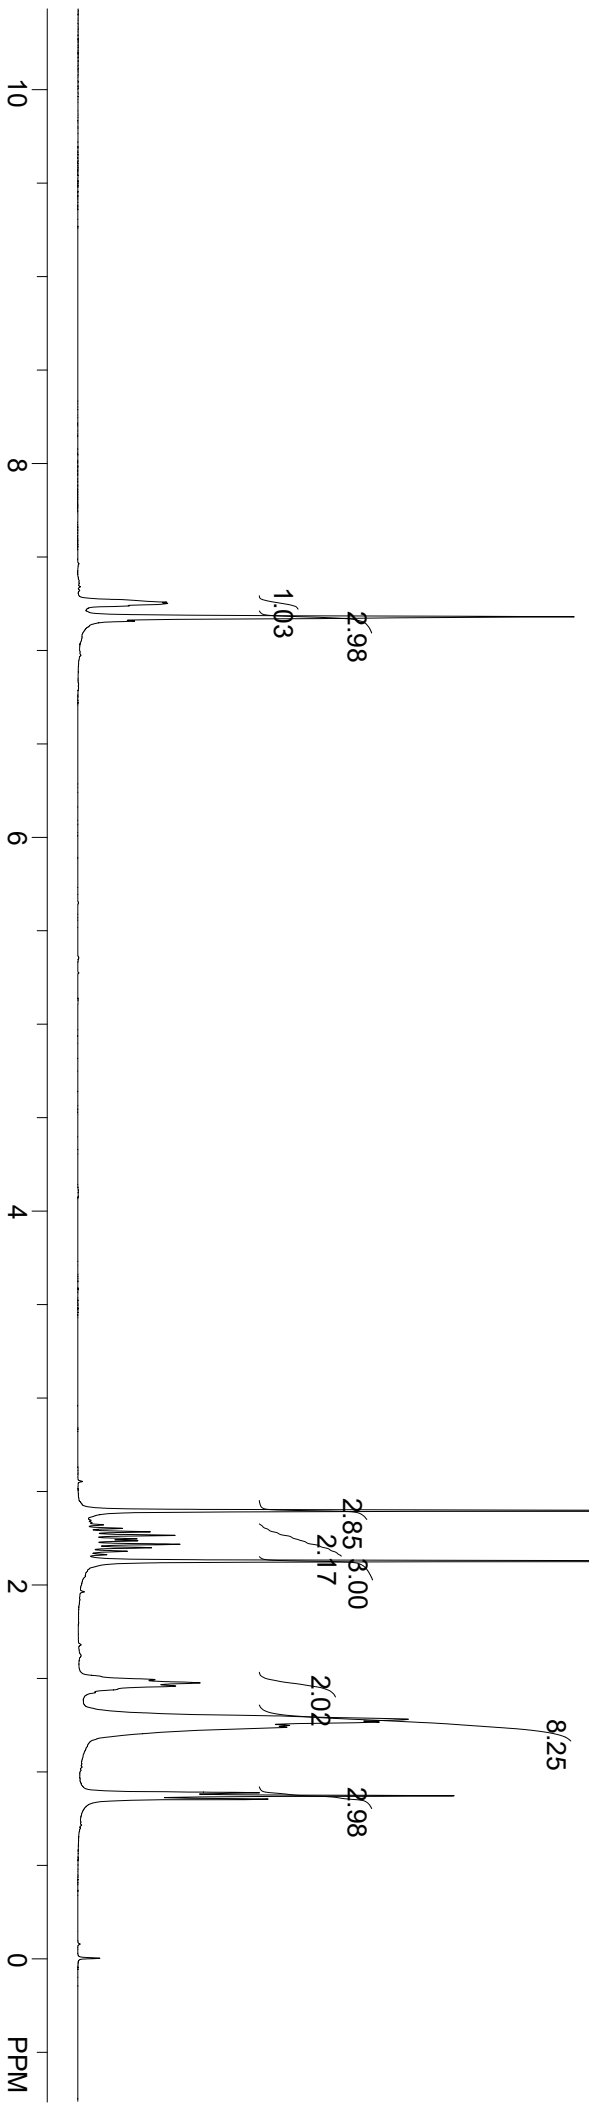

- 7.258
- 7.258
- 7.252
- 7.239
- 7.180
- 7.157

- 2.397
- 2.333
- 2.321
- 2.302
- 2.284
- 2.265
- 2.246
- 2.236
- 2.217
- 2.199
- 2.180
- 2.161
- 2.127
- 1.492
- 1.492
- 1.475
- 1.458
- 1.458
- 1.280
- 1.280
- 1.265
- 1.247
- 1.237
- 0.886
- 0.870
- 0.852
- 0.000



wj-1-070-2-C  
Sep 29 2019  
SOLVENT: CDCl3  
NA = 128  
F1 = 100.612770 MHz  
F2 = 1.000000 MHz

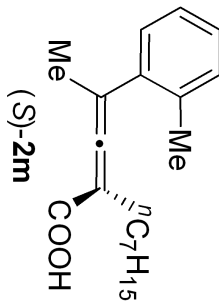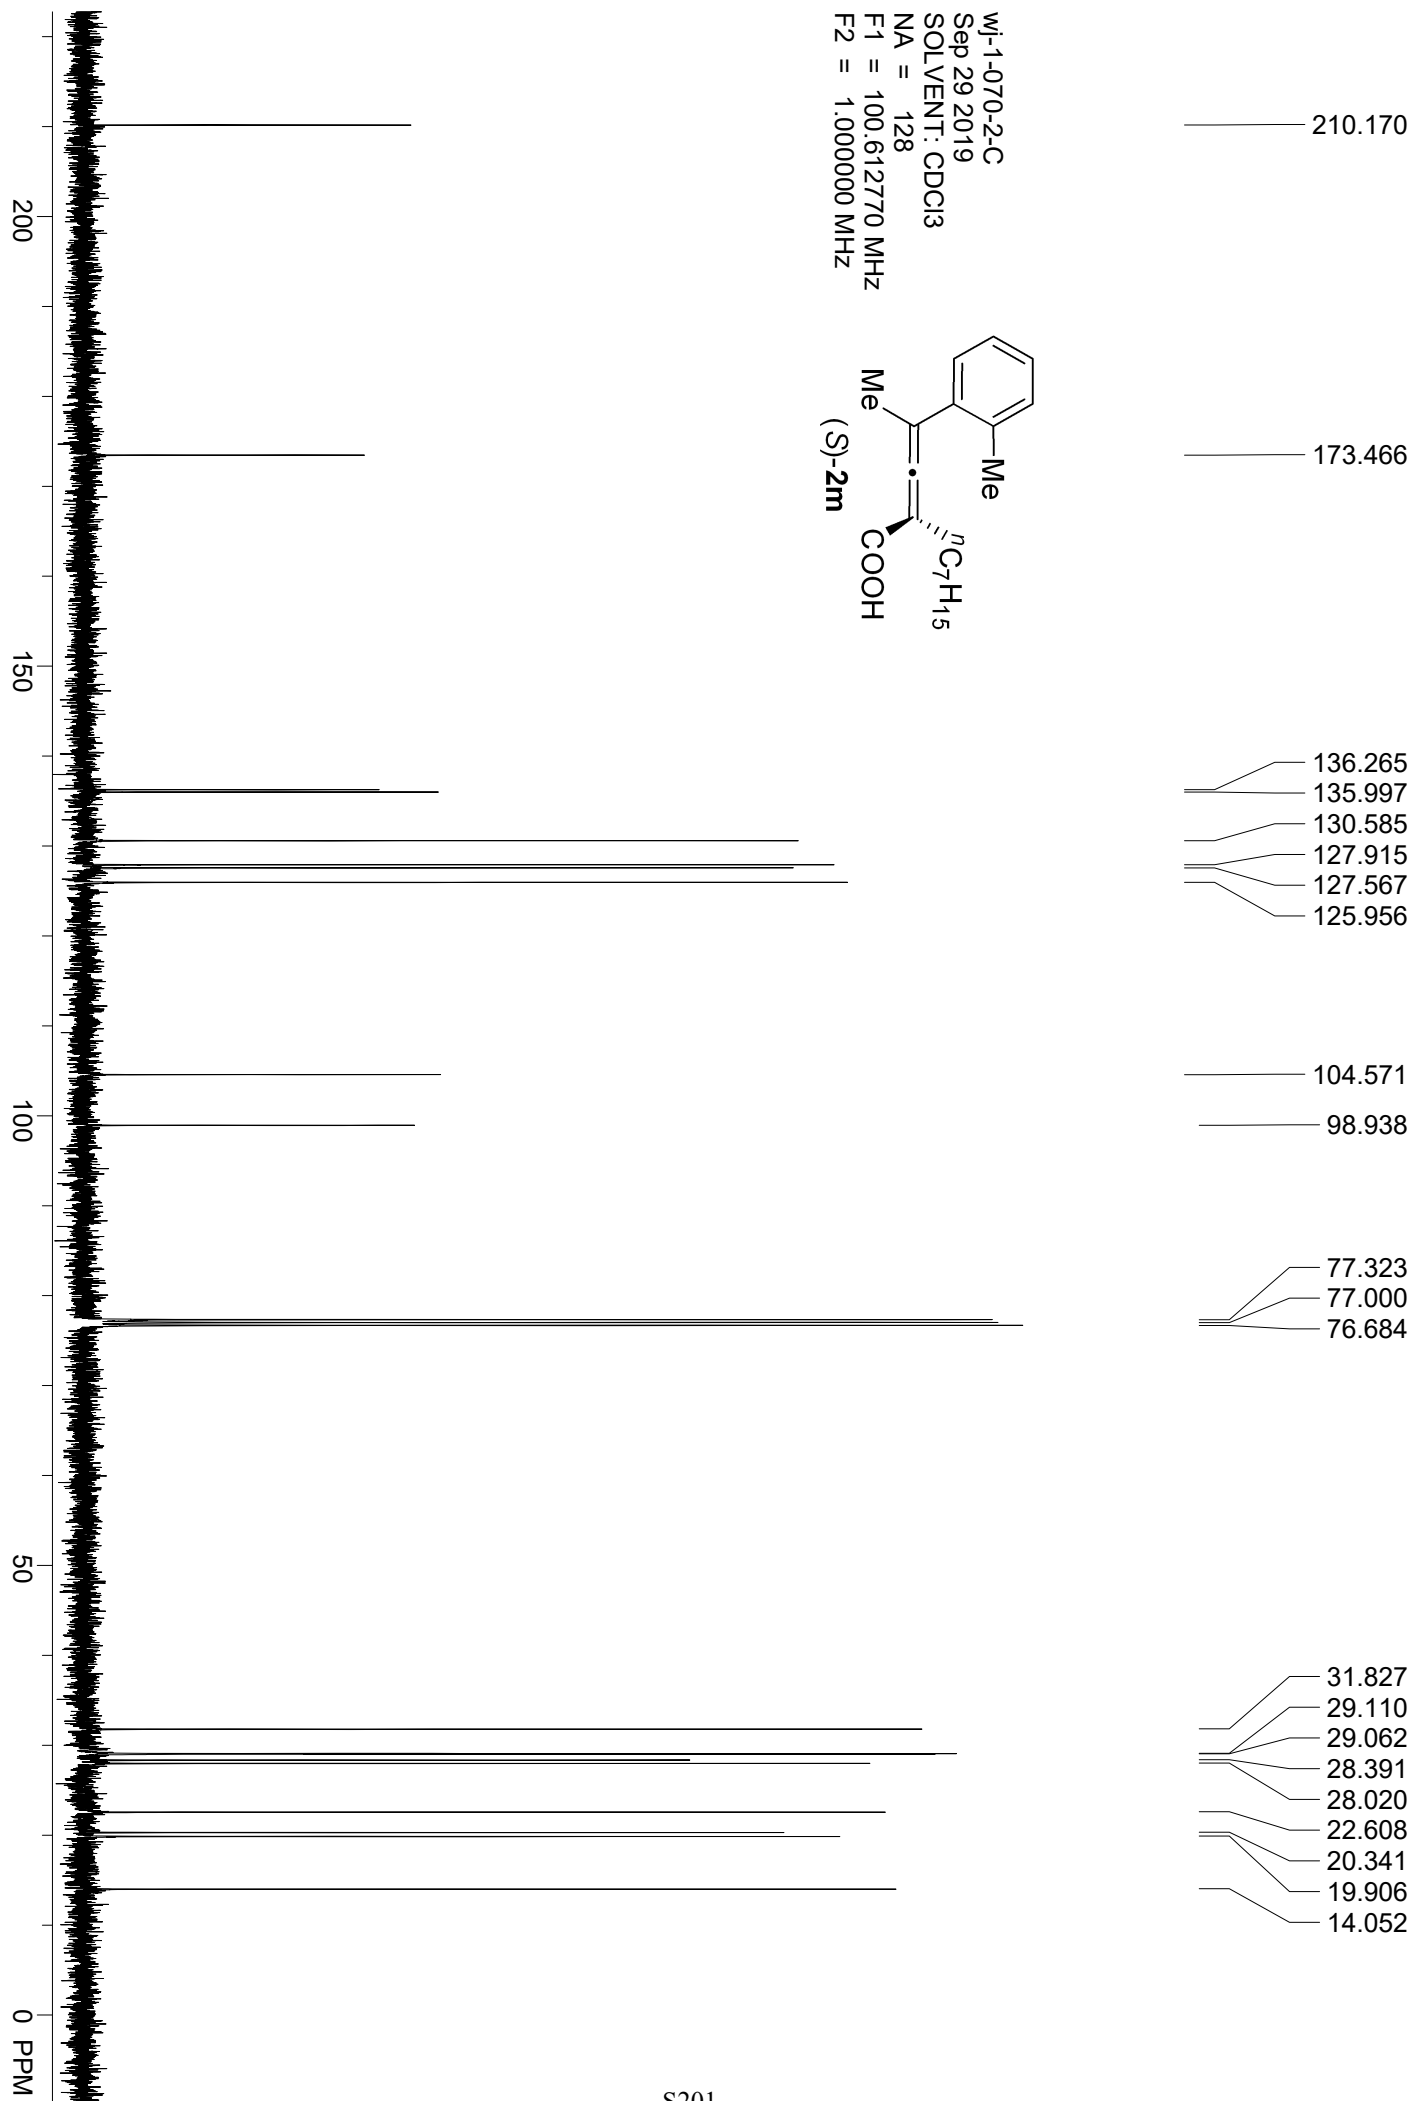

# Area Percent Report



Agilent Technologies

sample wj-1-070-2-AS-H-98-2-1.0-214

Data file: C:\Users\Public\Documents\ChemStation\1\Data\QAN 2019-09-29 18-30-35\016-P2-C3-wj-1-070-2.D

## Acquisition Data:

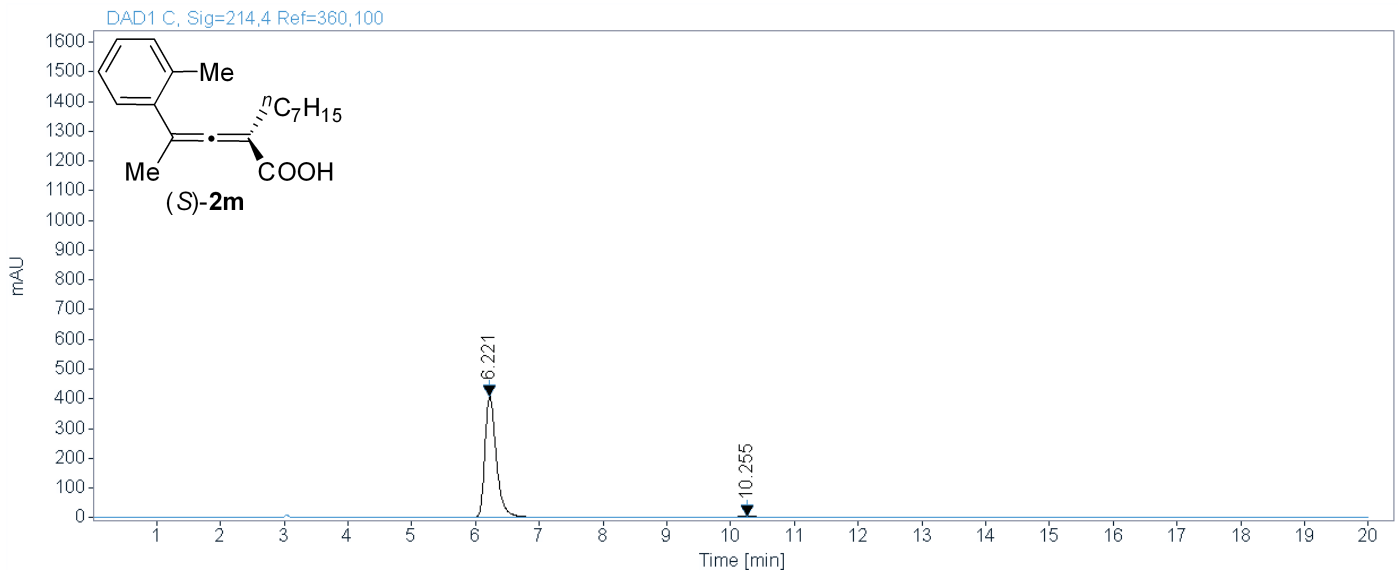

Signal: DAD1 C, Sig=214,4 Ref=360,100

| RT [min] | Width [min] | Height   | Area      | Area%    |
|----------|-------------|----------|-----------|----------|
| 6.221    | 0.1867      | 409.8192 | 5083.7461 | 97.8153  |
| 10.255   | 0.4338      | 4.3622   | 113.5469  | 2.1847   |
| Sum      |             |          | 5197.2930 | 100.0000 |

# Area Percent Report



Agilent Technologies

sample wj-1-070-2-rac-AS-H-98-2-1.0-214

Data file: C:\Users\Public\Documents\ChemStation\1\Data\QAN 2019-09-29 18-30-35\017-P2-C4-wj-1-070-2-rac.D

## Acquisition Data:

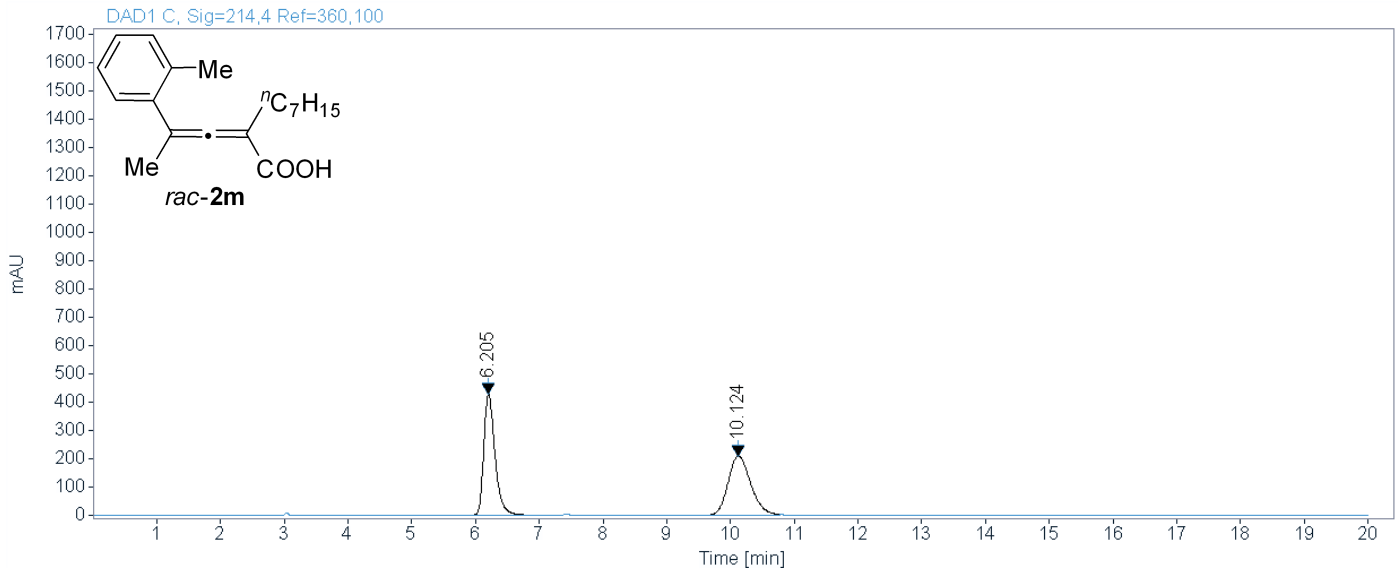

Signal: DAD1 C, Sig=214,4 Ref=360,100

| RT [min] | Width [min] | Height   | Area       | Area%    |
|----------|-------------|----------|------------|----------|
| 6.205    | 0.1860      | 429.8355 | 5230.5894  | 50.1663  |
| 10.124   | 0.4128      | 209.7661 | 5195.9199  | 49.8337  |
| Sum      |             |          | 10426.5093 | 100.0000 |

WJ-1-074-2-H  
Oct 07 2019  
SOLVENT: CDCl3  
NA = 4  
F1 = 400.130005 MHz  
F2 = 1.000000 MHz

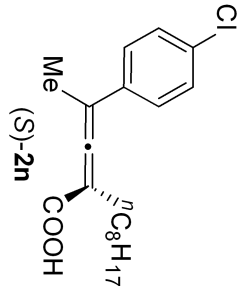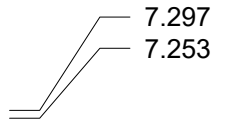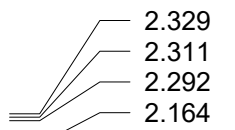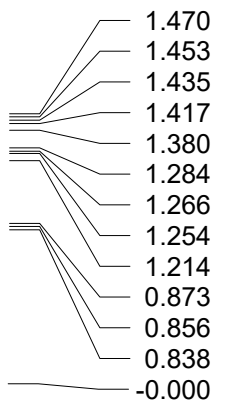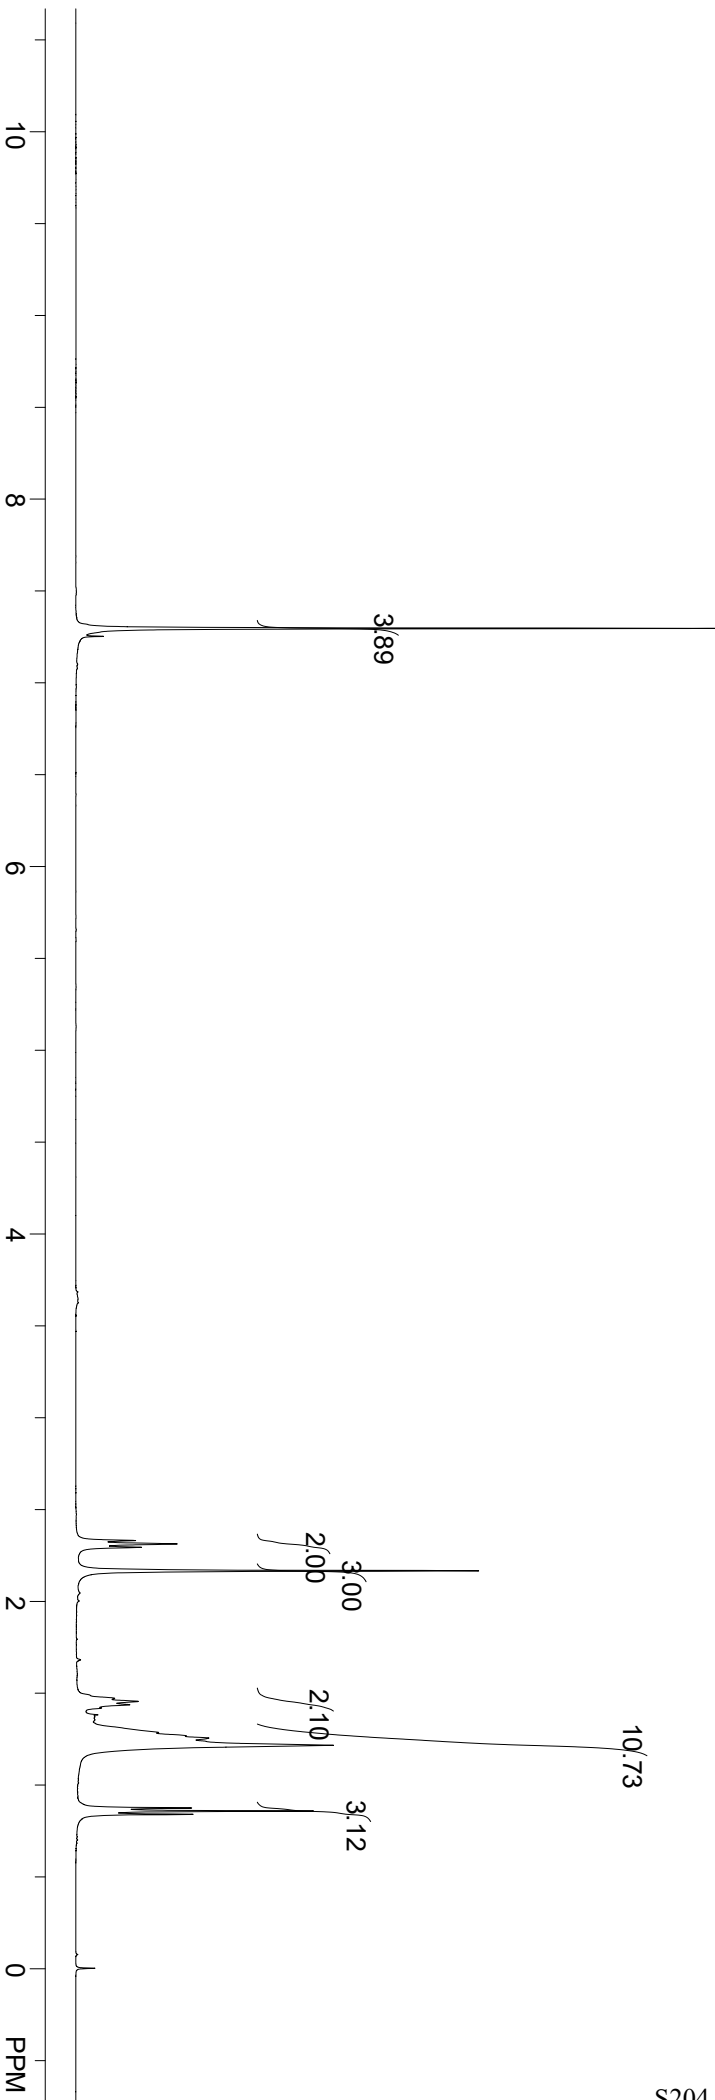

wj-1-074-2-C  
Oct 07 2019  
SOLVENT: CDCl3  
NA = 256  
F1 = 100.612770 MHz  
F2 = 1.000000 MHz

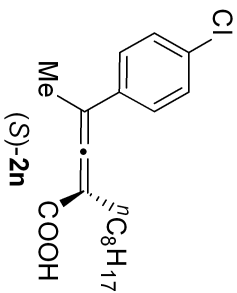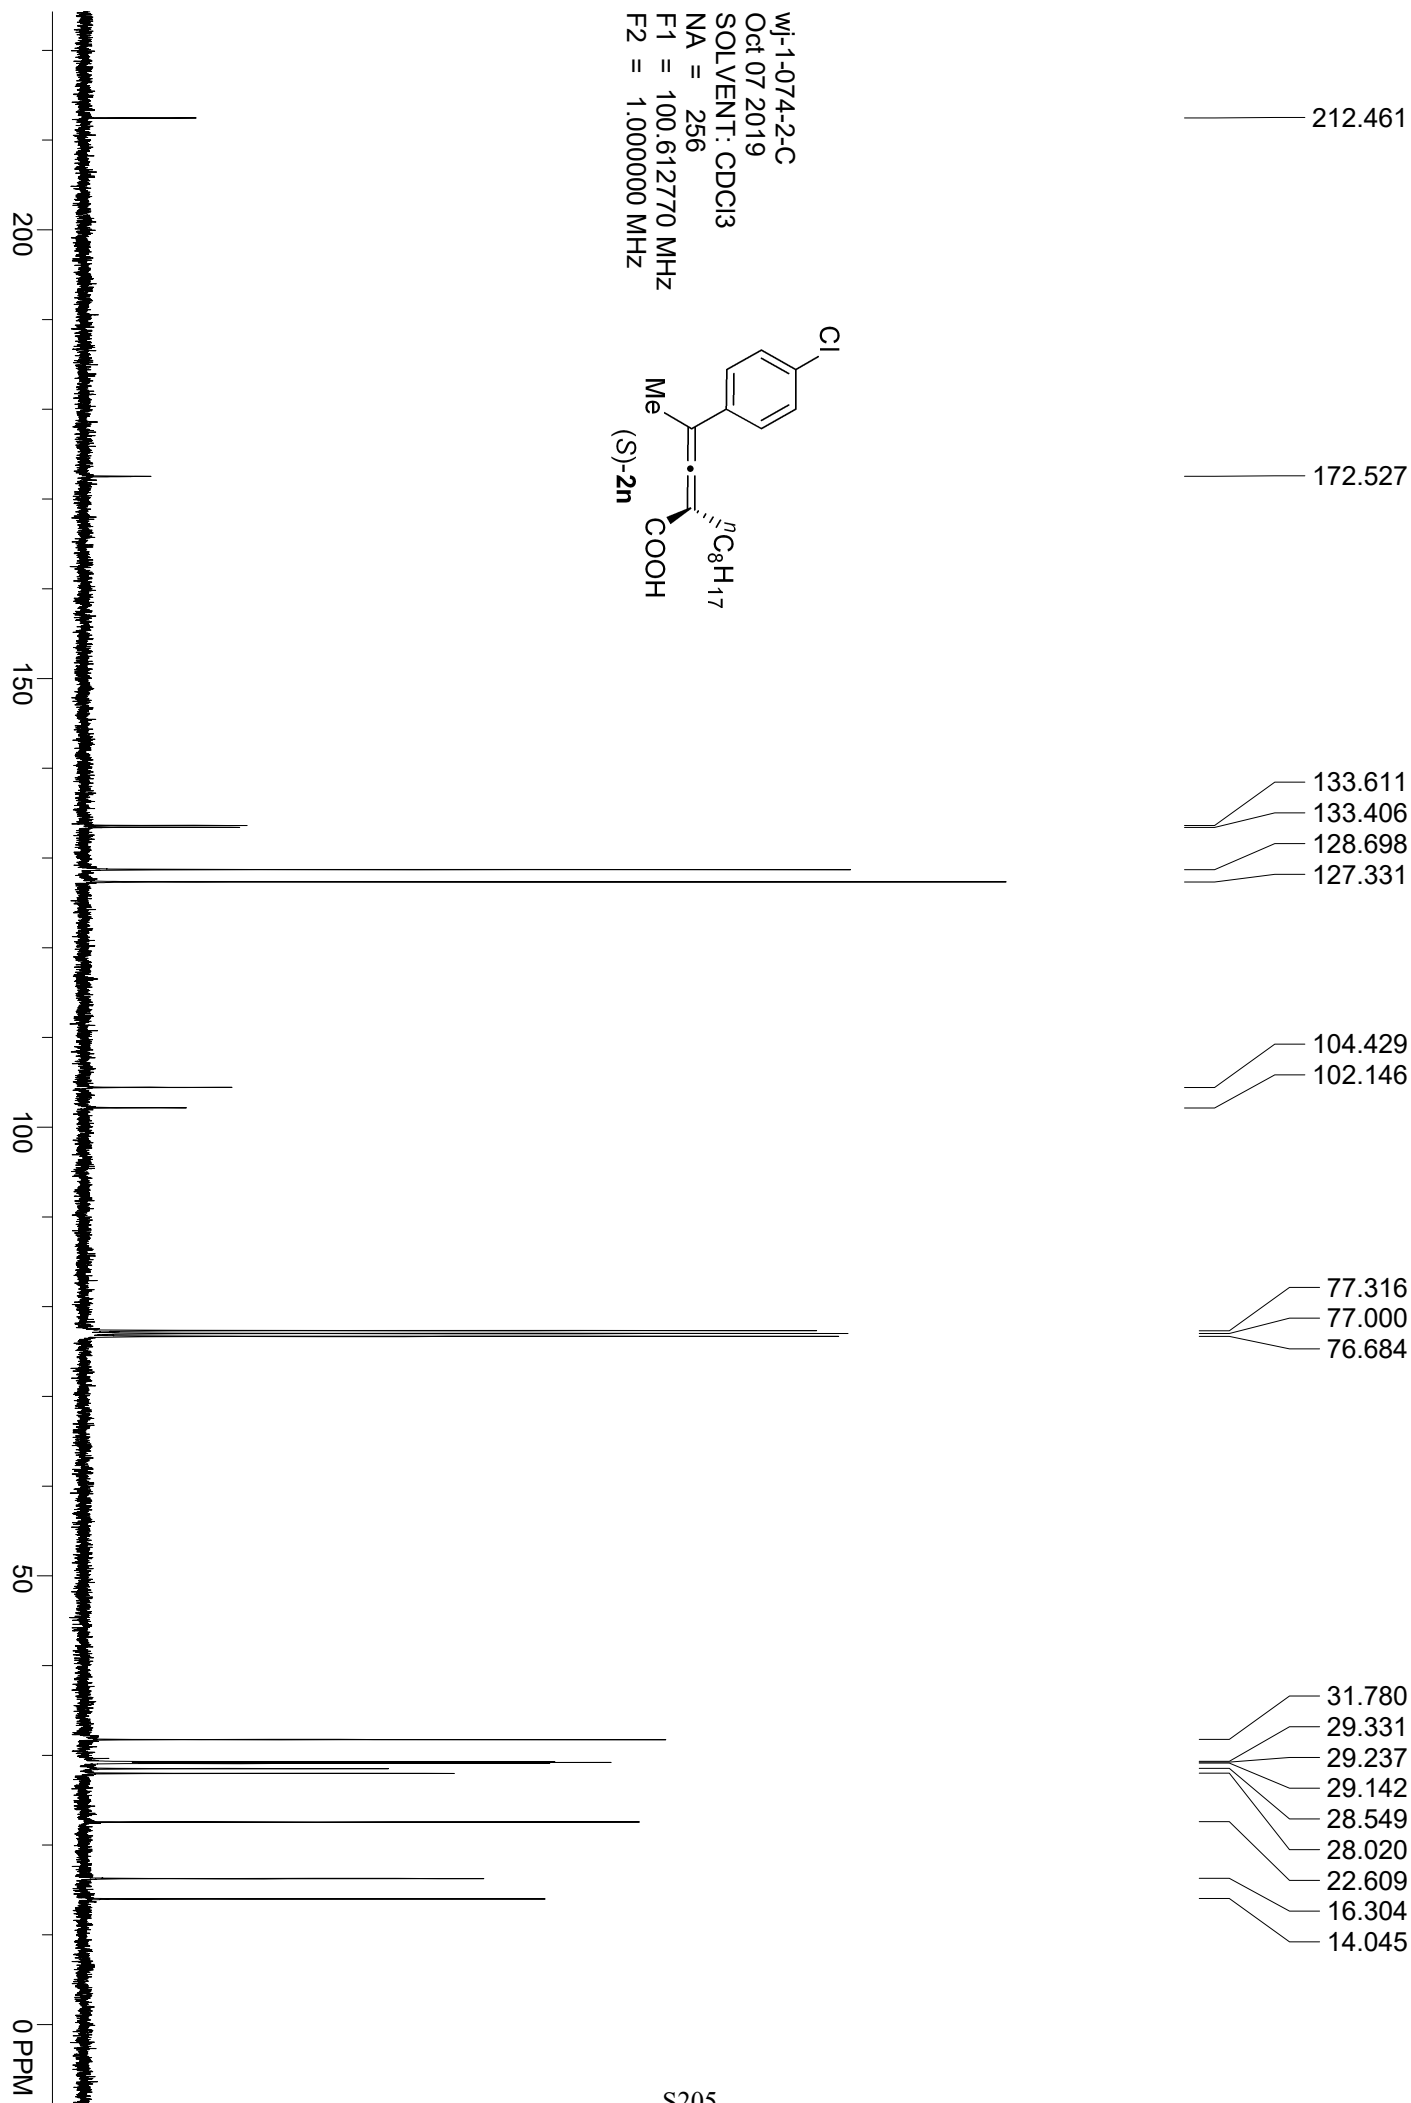

# Area Percent Report



sample wj-1-074-2-AS-H-98-2-1.0-214

Data file: C:\Users\Public\Documents\ChemStation\1\Data\zwf-allenioc acid\_LC 2019-10-06 14-14-49\027-P2-C7-wj-1-074-2.D

## Acquisition Data:

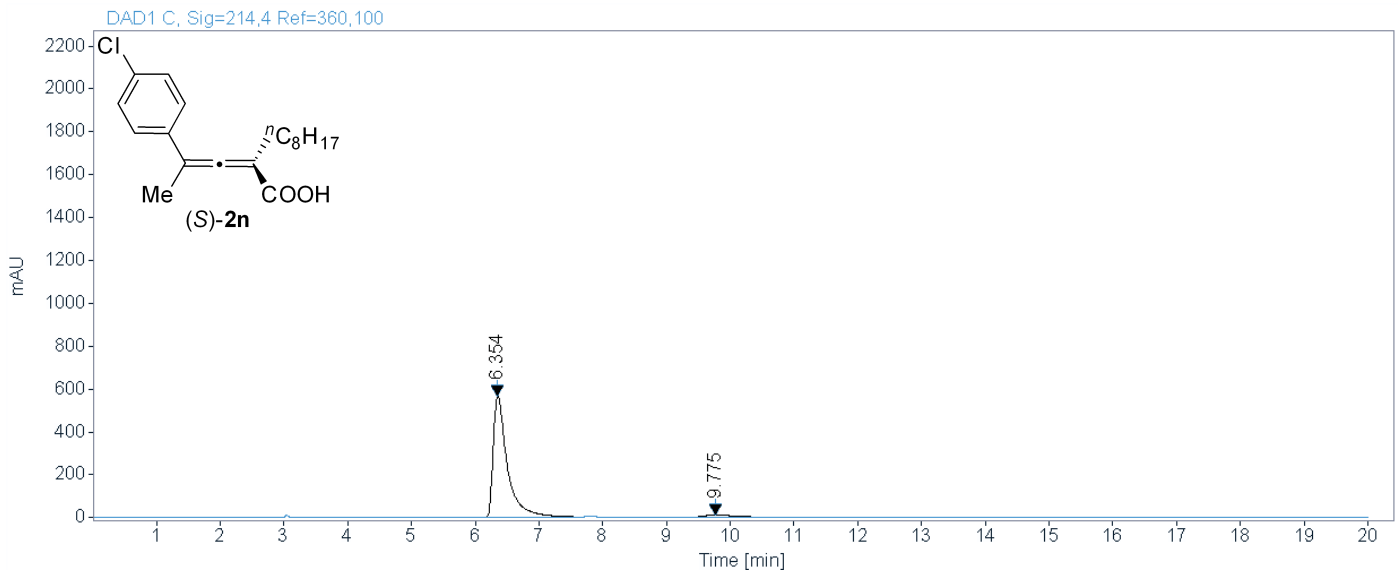

Signal: DAD1 C, Sig=214,4 Ref=360,100

| RT [min] | Width [min] | Height   | Area      | Area%    |
|----------|-------------|----------|-----------|----------|
| 6.354    | 0.2598      | 568.2360 | 8858.5625 | 95.4554  |
| 9.775    | 0.5934      | 11.8454  | 421.7574  | 4.5446   |
|          |             | Sum      | 9280.3199 | 100.0000 |

# Area Percent Report



Agilent Technologies

sample wj-1-074-2-rac-AS-H-98-2-1.0-214

Data file: C:\Users\Public\Documents\ChemStation\1\Data\zwf-allenioc acid\_LC 2019-10-06 14-14-49\028-P2-C8-wj-1-074-2-rac.D

## Acquisition Data:

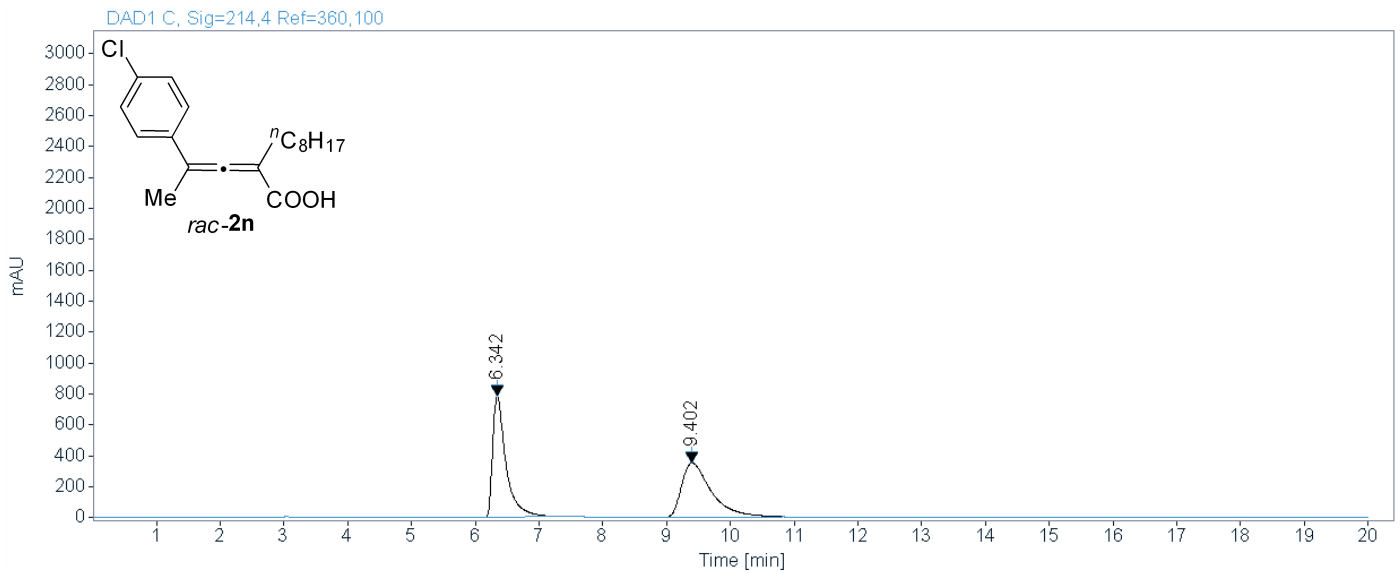

Signal: DAD1 C, Sig=214,4 Ref=360,100

| RT [min] | Width [min] | Height   | Area       | Area%    |
|----------|-------------|----------|------------|----------|
| 6.342    | 0.2174      | 786.3198 | 11554.1123 | 50.0759  |
| 9.402    | 0.5432      | 353.4627 | 11519.1074 | 49.9241  |
| Sum      |             |          | 23073.2197 | 100.0000 |

wj-1-066-2-H  
Sep 25 2019  
SOLVENT: CDCl3  
NA = 4  
F1 = 400.130005 MHz  
F2 = 1.000000 MHz

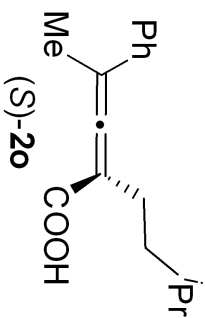

7.389  
7.369  
7.355  
7.337  
7.317  
7.266  
7.248  
7.237  
7.230

2.346  
2.327  
2.307  
2.188  
1.633  
1.616  
1.600  
1.583  
1.567  
1.550  
1.533  
1.388  
1.369  
1.349  
1.331  
0.888  
0.872  
0.858  
0.000

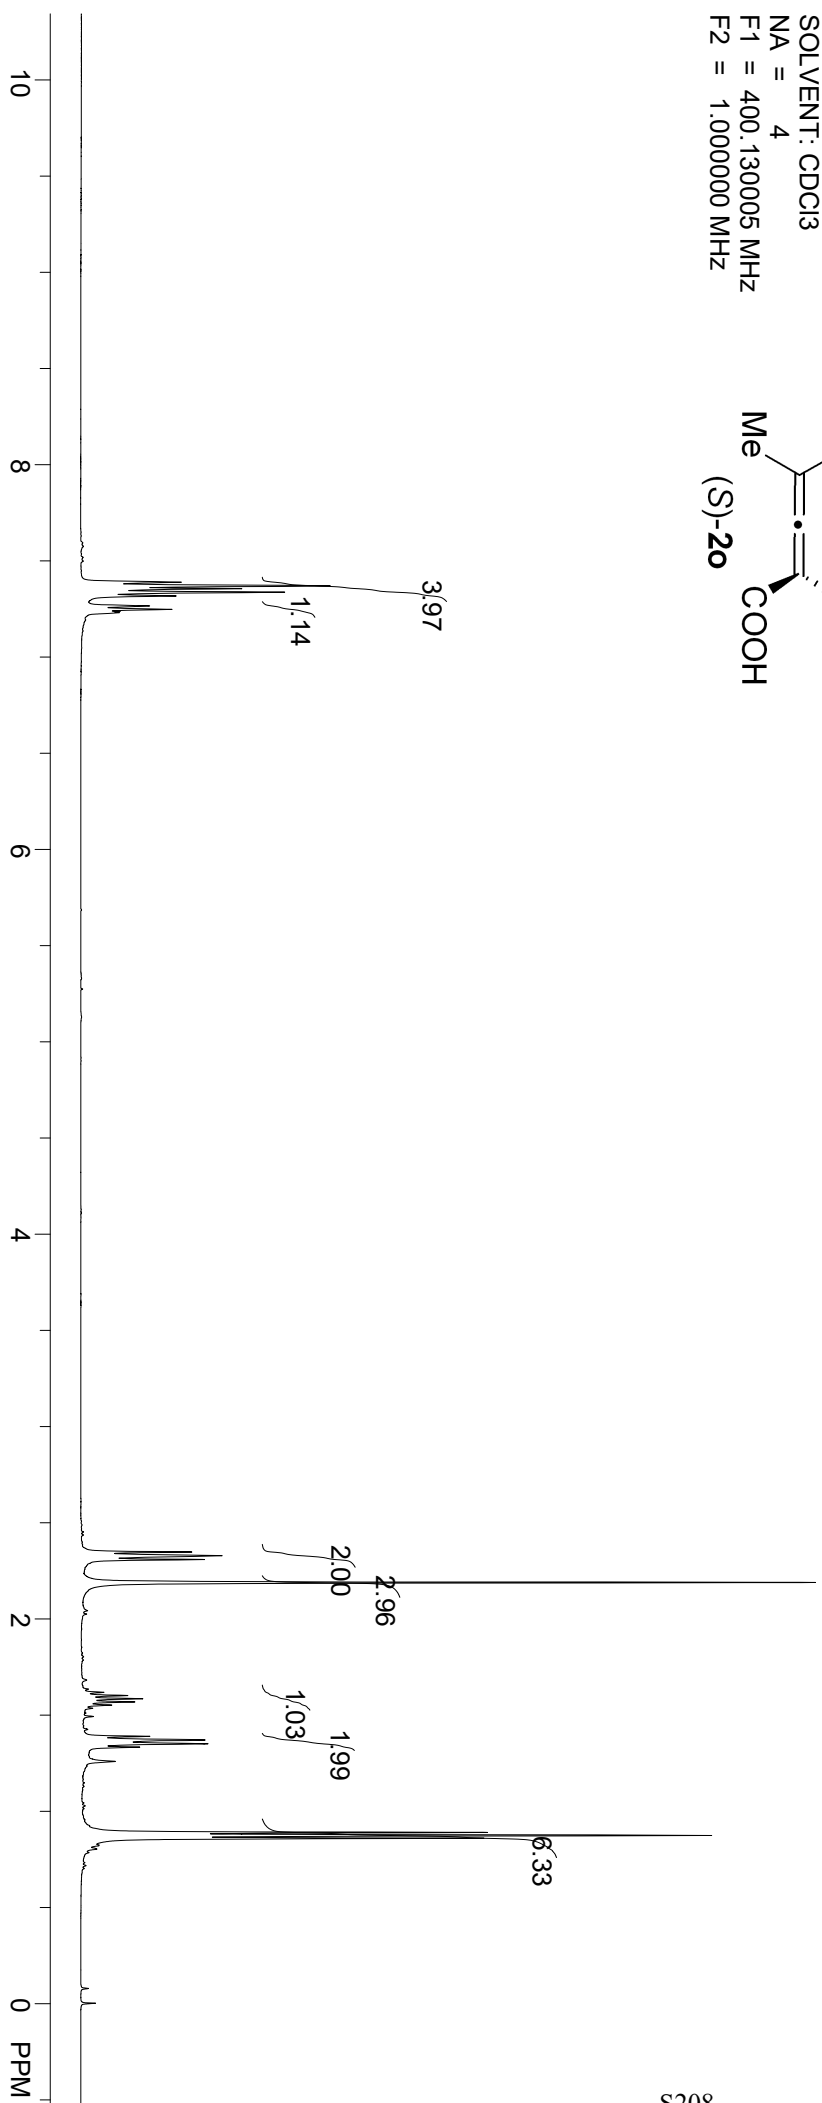



wj-1-066-2-C  
Sep 25 2019  
SOLVENT: CDCl3  
NA = 50  
F1 = 100.612770 MHz  
F2 = 1.000000 MHz

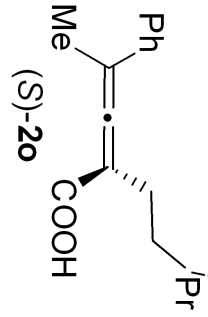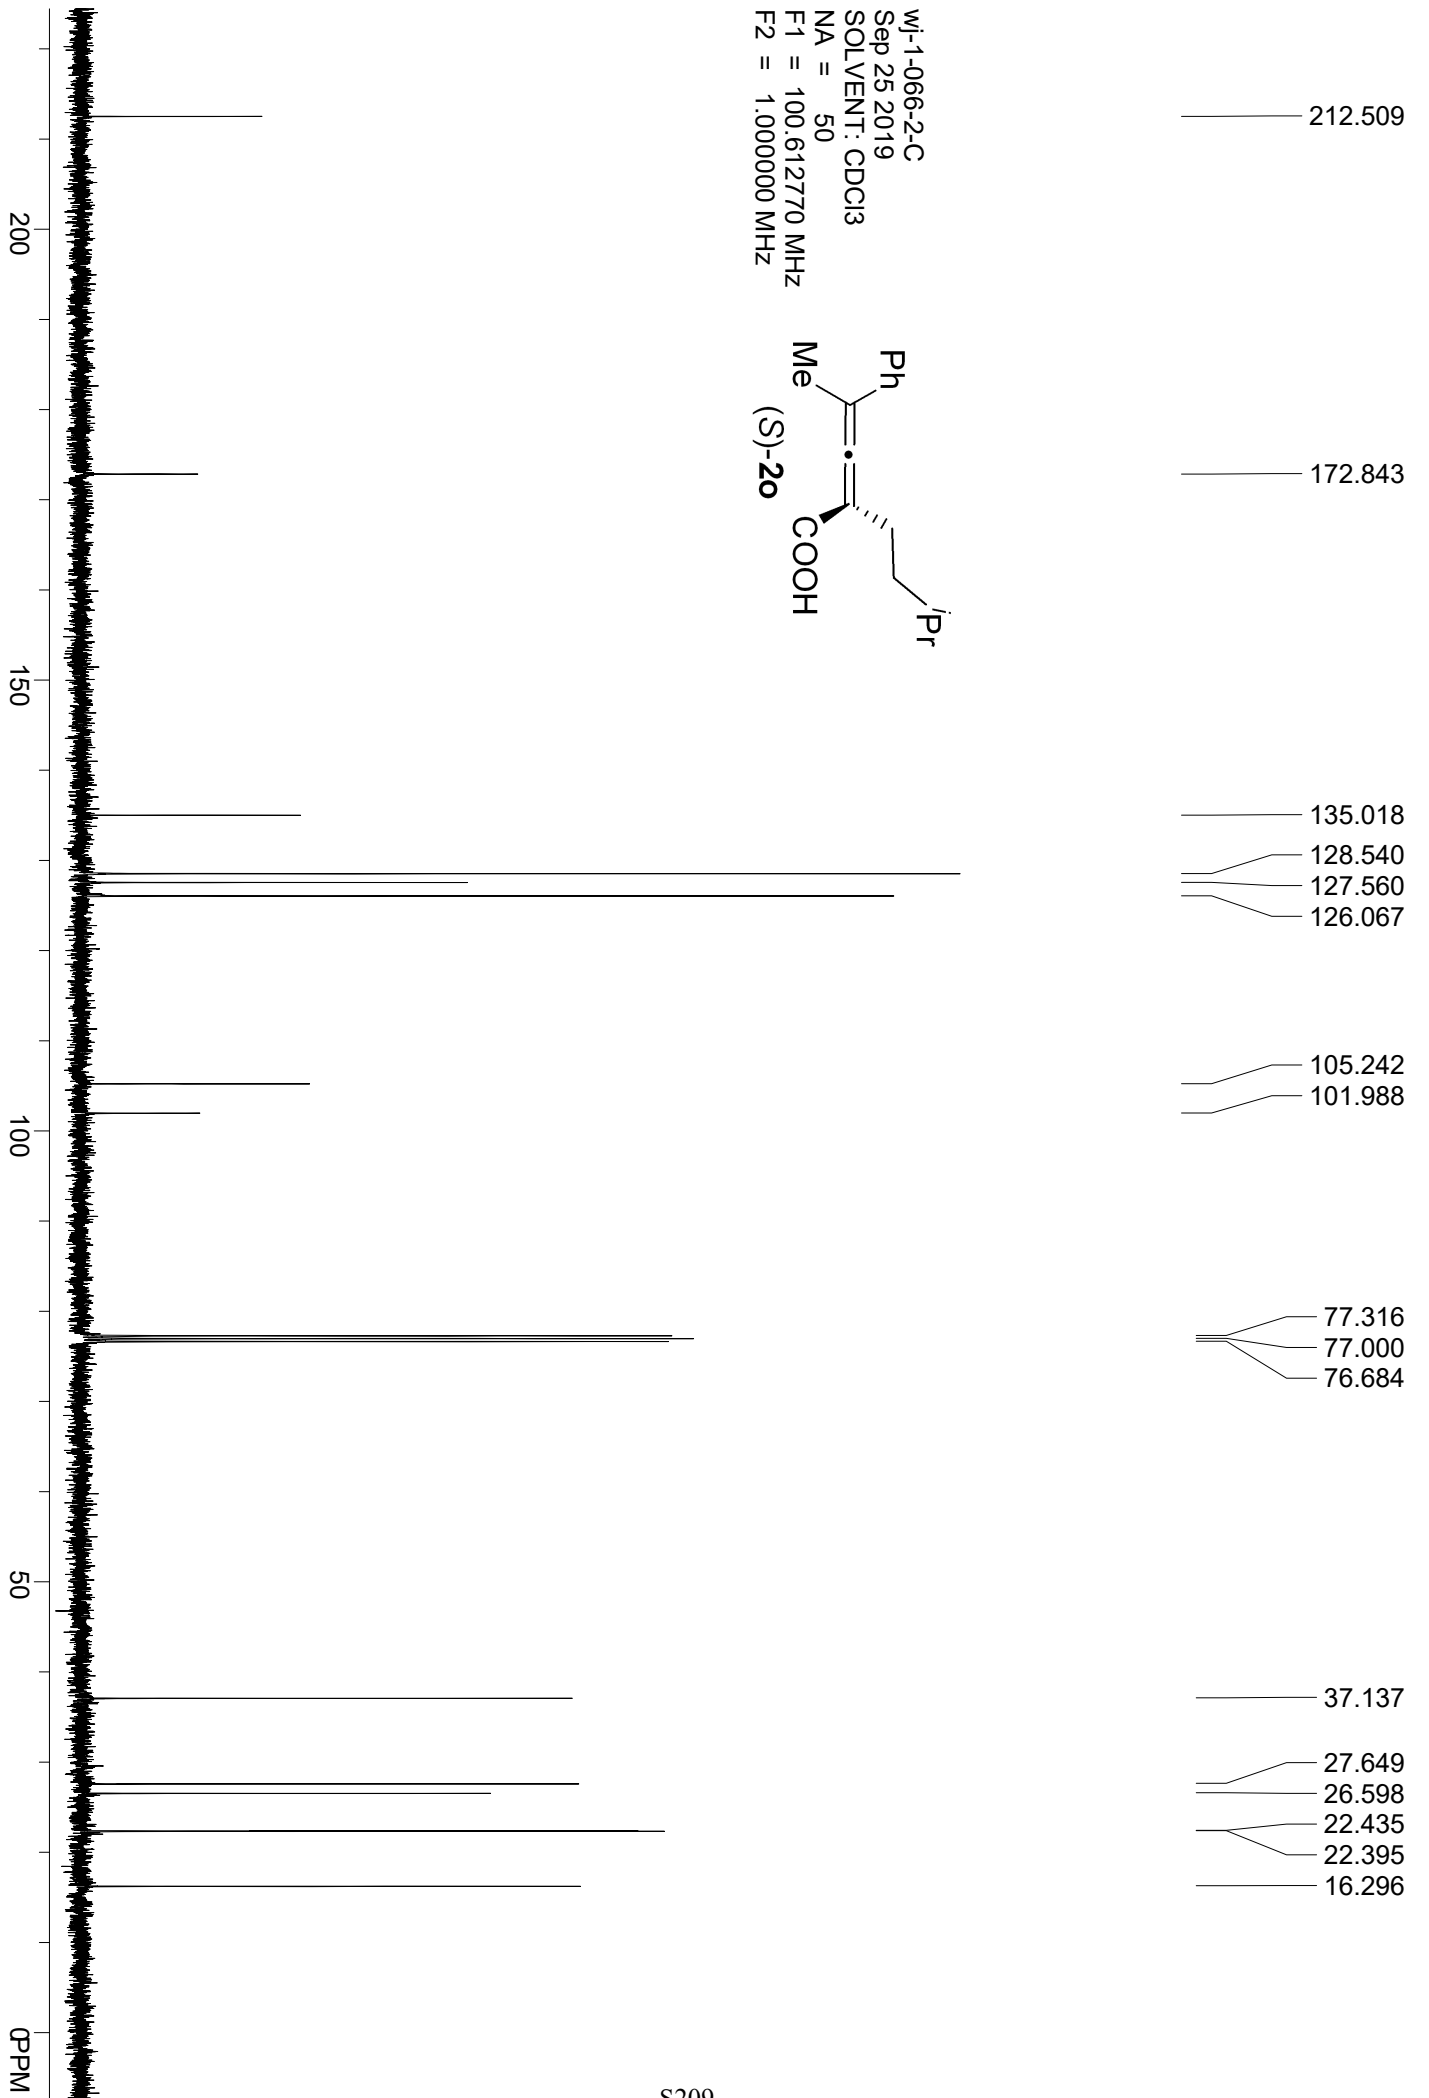

# Area Percent Report



Agilent Technologies

sample wj-1-066-2-AS-H-98-2-1.0-214

Data file: C:\Users\Public\Documents\ChemStation\1\Data\wgl 2019-09-25 09-43-22\039-P2-C1-wj-1-066-2.D

## Acquisition Data:

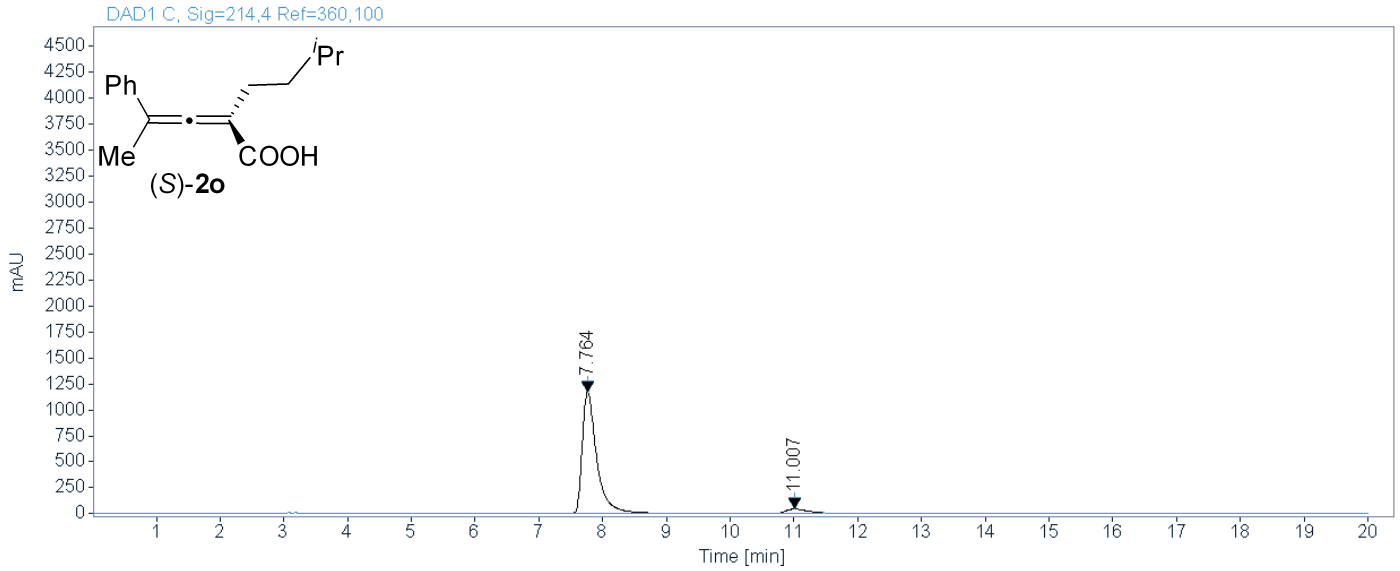

Signal: DAD1 C, Sig=214,4 Ref=360,100

| RT [min] | Width [min] | Height    | Area       | Area%    |
|----------|-------------|-----------|------------|----------|
| 7.764    | 0.2391      | 1173.9525 | 18828.7598 | 95.3185  |
| 11.007   | 0.3785      | 40.7234   | 924.7599   | 4.6815   |
| Sum      |             |           | 19753.5197 | 100.0000 |

# Area Percent Report



Agilent Technologies

sample wj-1-066-2-rac-AS-H-98-2-1.0-214

Data file: C:\Users\Public\Documents\ChemStation\1\Data\wgl 2019-09-25 09-43-22\040-P2-C2-wj-1-066-2-rac.D

## Acquisition Data:

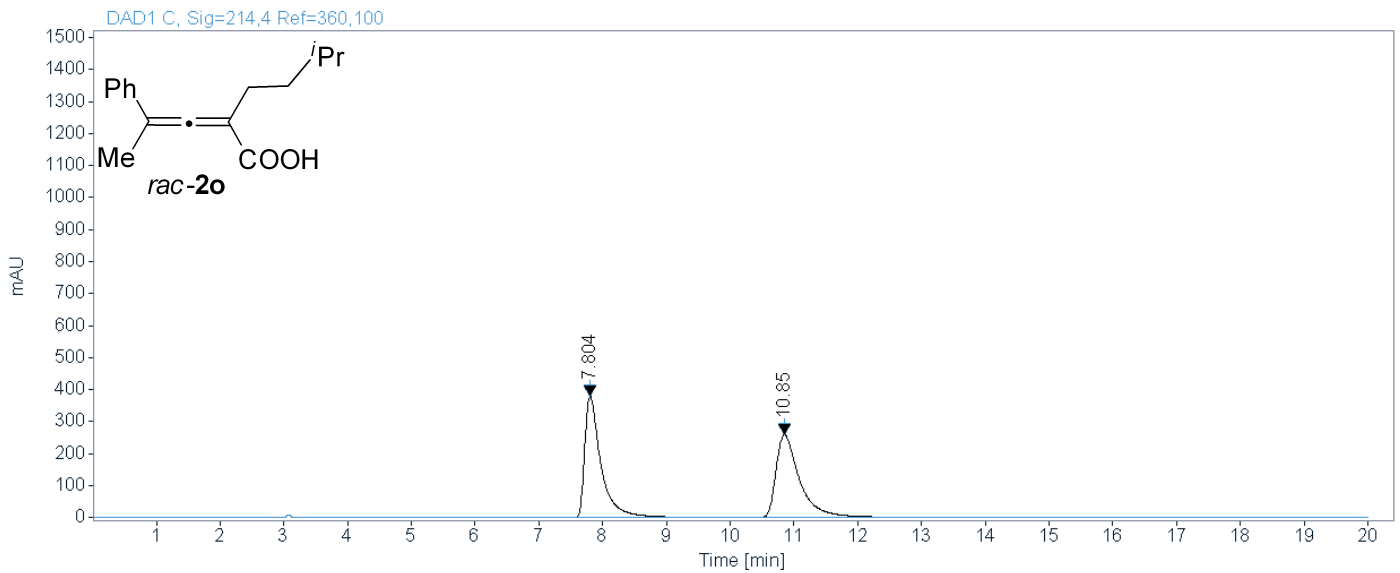

Signal: DAD1 C, Sig=214,4 Ref=360,100

| RT [min] | Width [min] | Height   | Area       | Area%    |
|----------|-------------|----------|------------|----------|
| 7.804    | 0.2621      | 380.7250 | 6792.5049  | 50.0949  |
| 10.850   | 0.3886      | 259.1956 | 6766.7642  | 49.9051  |
| Sum      |             |          | 13559.2690 | 100.0000 |

wj-1-064-2-H  
Sep 24 2019  
SOLVENT: CDCl3  
NA = 4  
F1 = 400.130005 MHz  
F2 = 1.000000 MHz

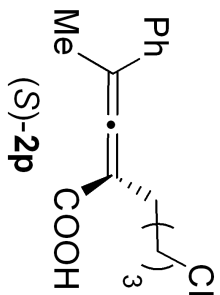

7.386  
7.369  
7.364  
7.344  
7.325  
7.278  
7.261  
7.247

3.512  
3.495  
3.479

2.378  
2.360  
2.341  
2.203  
1.836  
1.820  
1.802  
1.783  
1.766  
1.670  
1.652  
1.634  
1.630  
1.617  
1.610  
1.598  
1.256  
-0.000

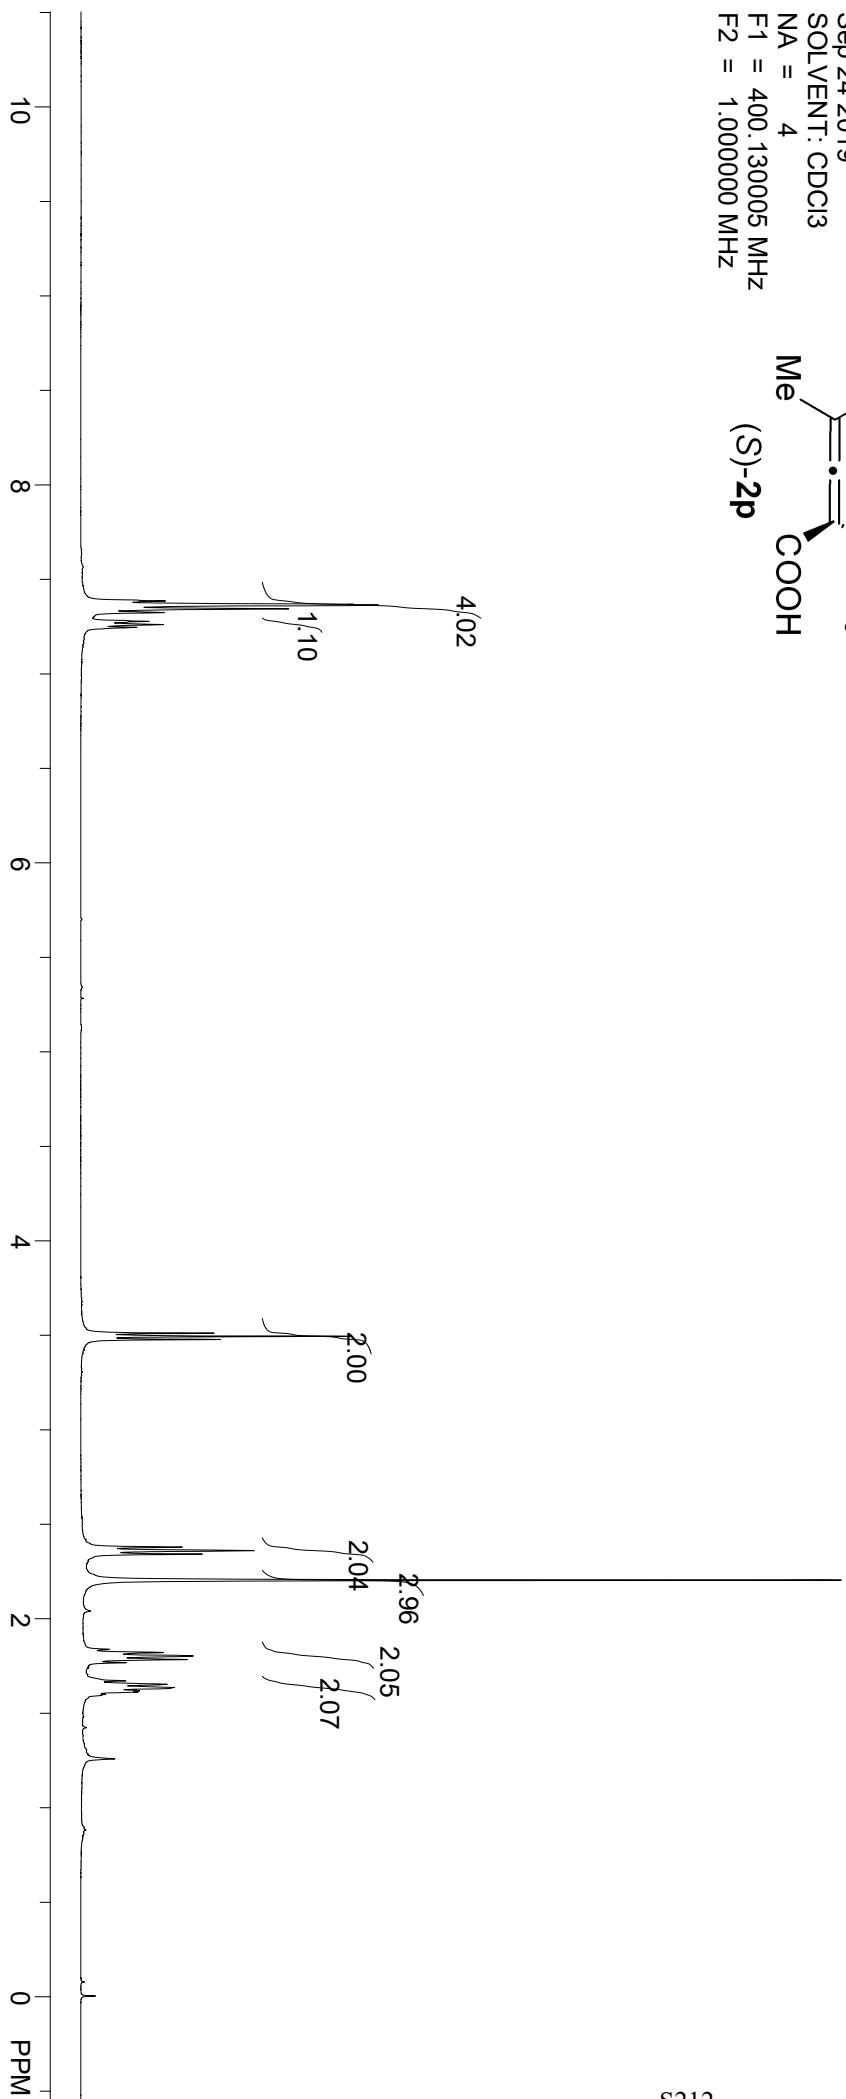

wj-1-064-2-C  
Sep 24 2019  
SOLVENT: CDCl3  
NA = 50  
F1 = 100.612770 MHz  
F2 = 1.000000 MHz

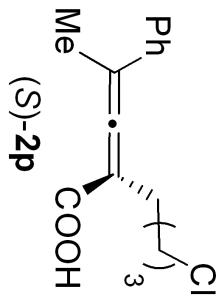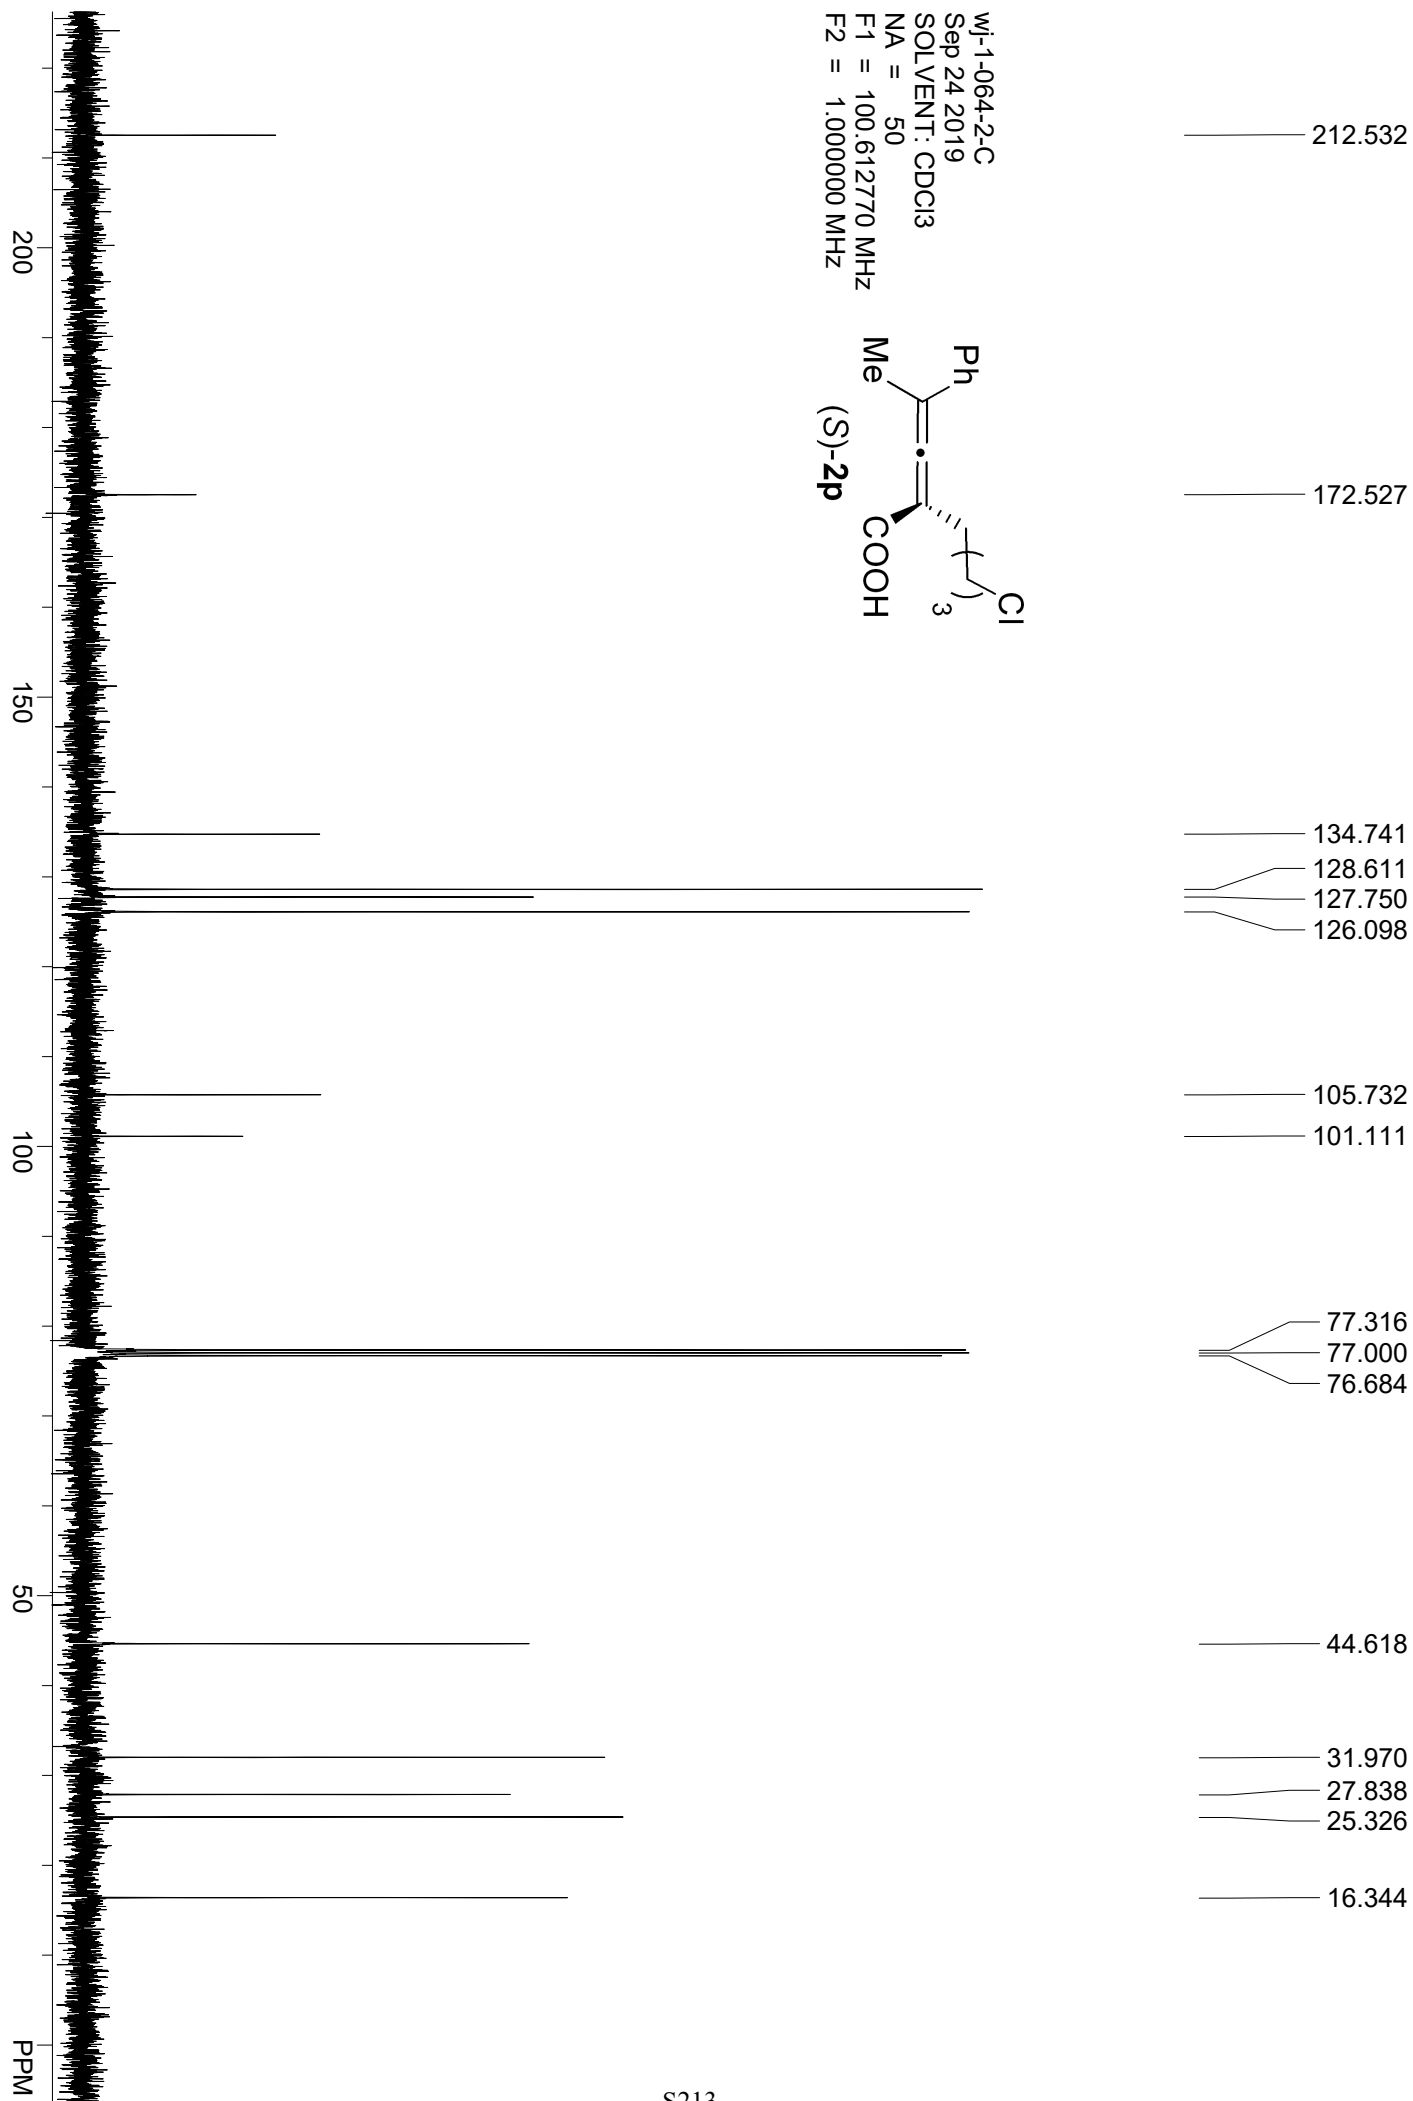

# Area Percent Report



Agilent Technologies

sample wj-1-064-2-AS-H-95-5-1.0-214

Data file: C:\Users\Public\Documents\ChemStation\1\Data\wgl 2019-09-24 10-35-10\033-P2-C5-wj-1-064-2.D

## Acquisition Data:

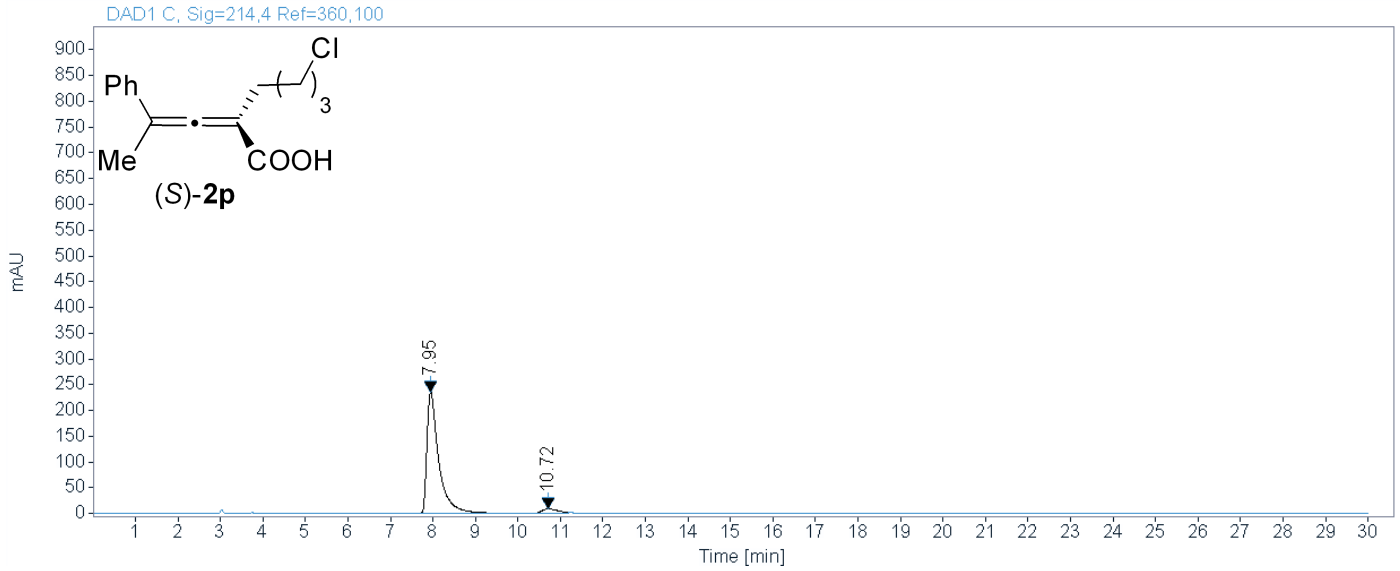

Signal: DAD1 C, Sig=214,4 Ref=360,100

| RT [min] | Width [min] | Height   | Area      | Area%    |
|----------|-------------|----------|-----------|----------|
| 7.950    | 0.2844      | 236.0499 | 4580.5767 | 95.5169  |
| 10.720   | 0.4204      | 8.5227   | 214.9886  | 4.4831   |
| Sum      |             |          | 4795.5653 | 100.0000 |

# Area Percent Report



Agilent Technologies

sample wj-1-064-2-rac-AS-H-95-5-1.0-214

Data file: C:\Users\Public\Documents\ChemStation\1\Data\wgl 2019-09-24 10-35-10\034-P2-C6-wj-1-064-2-rac.D

## Acquisition Data:

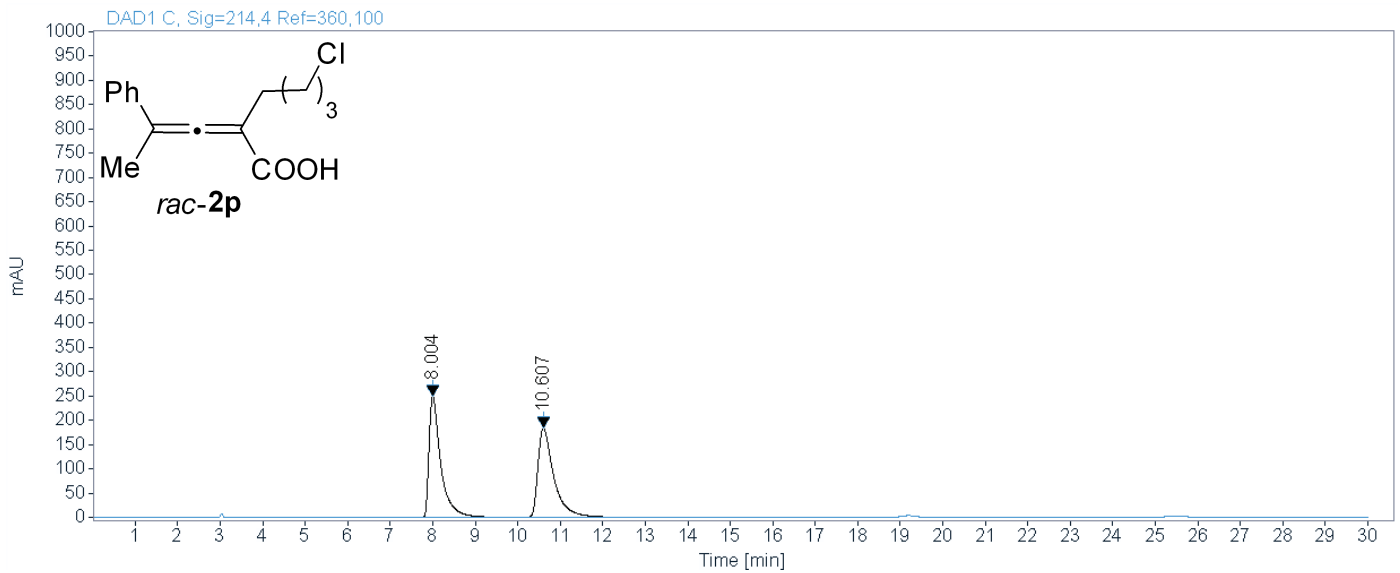

Signal: DAD1 C, Sig=214,4 Ref=360,100

| RT [min] | Width [min] | Height   | Area      | Area%    |
|----------|-------------|----------|-----------|----------|
| 8.004    | 0.2830      | 250.5520 | 4832.7207 | 49.8970  |
| 10.607   | 0.3901      | 183.7673 | 4852.6724 | 50.1030  |
| Sum      |             |          | 9685.3931 | 100.0000 |

WJ-1-056-2-H  
Sep 17 2019  
SOLVENT: CDCl3  
NA = 4  
F1 = 400.130035 MHz  
F2 = 1.000000 MHz

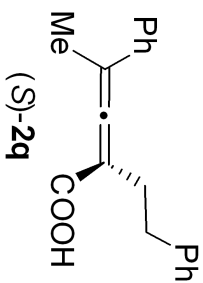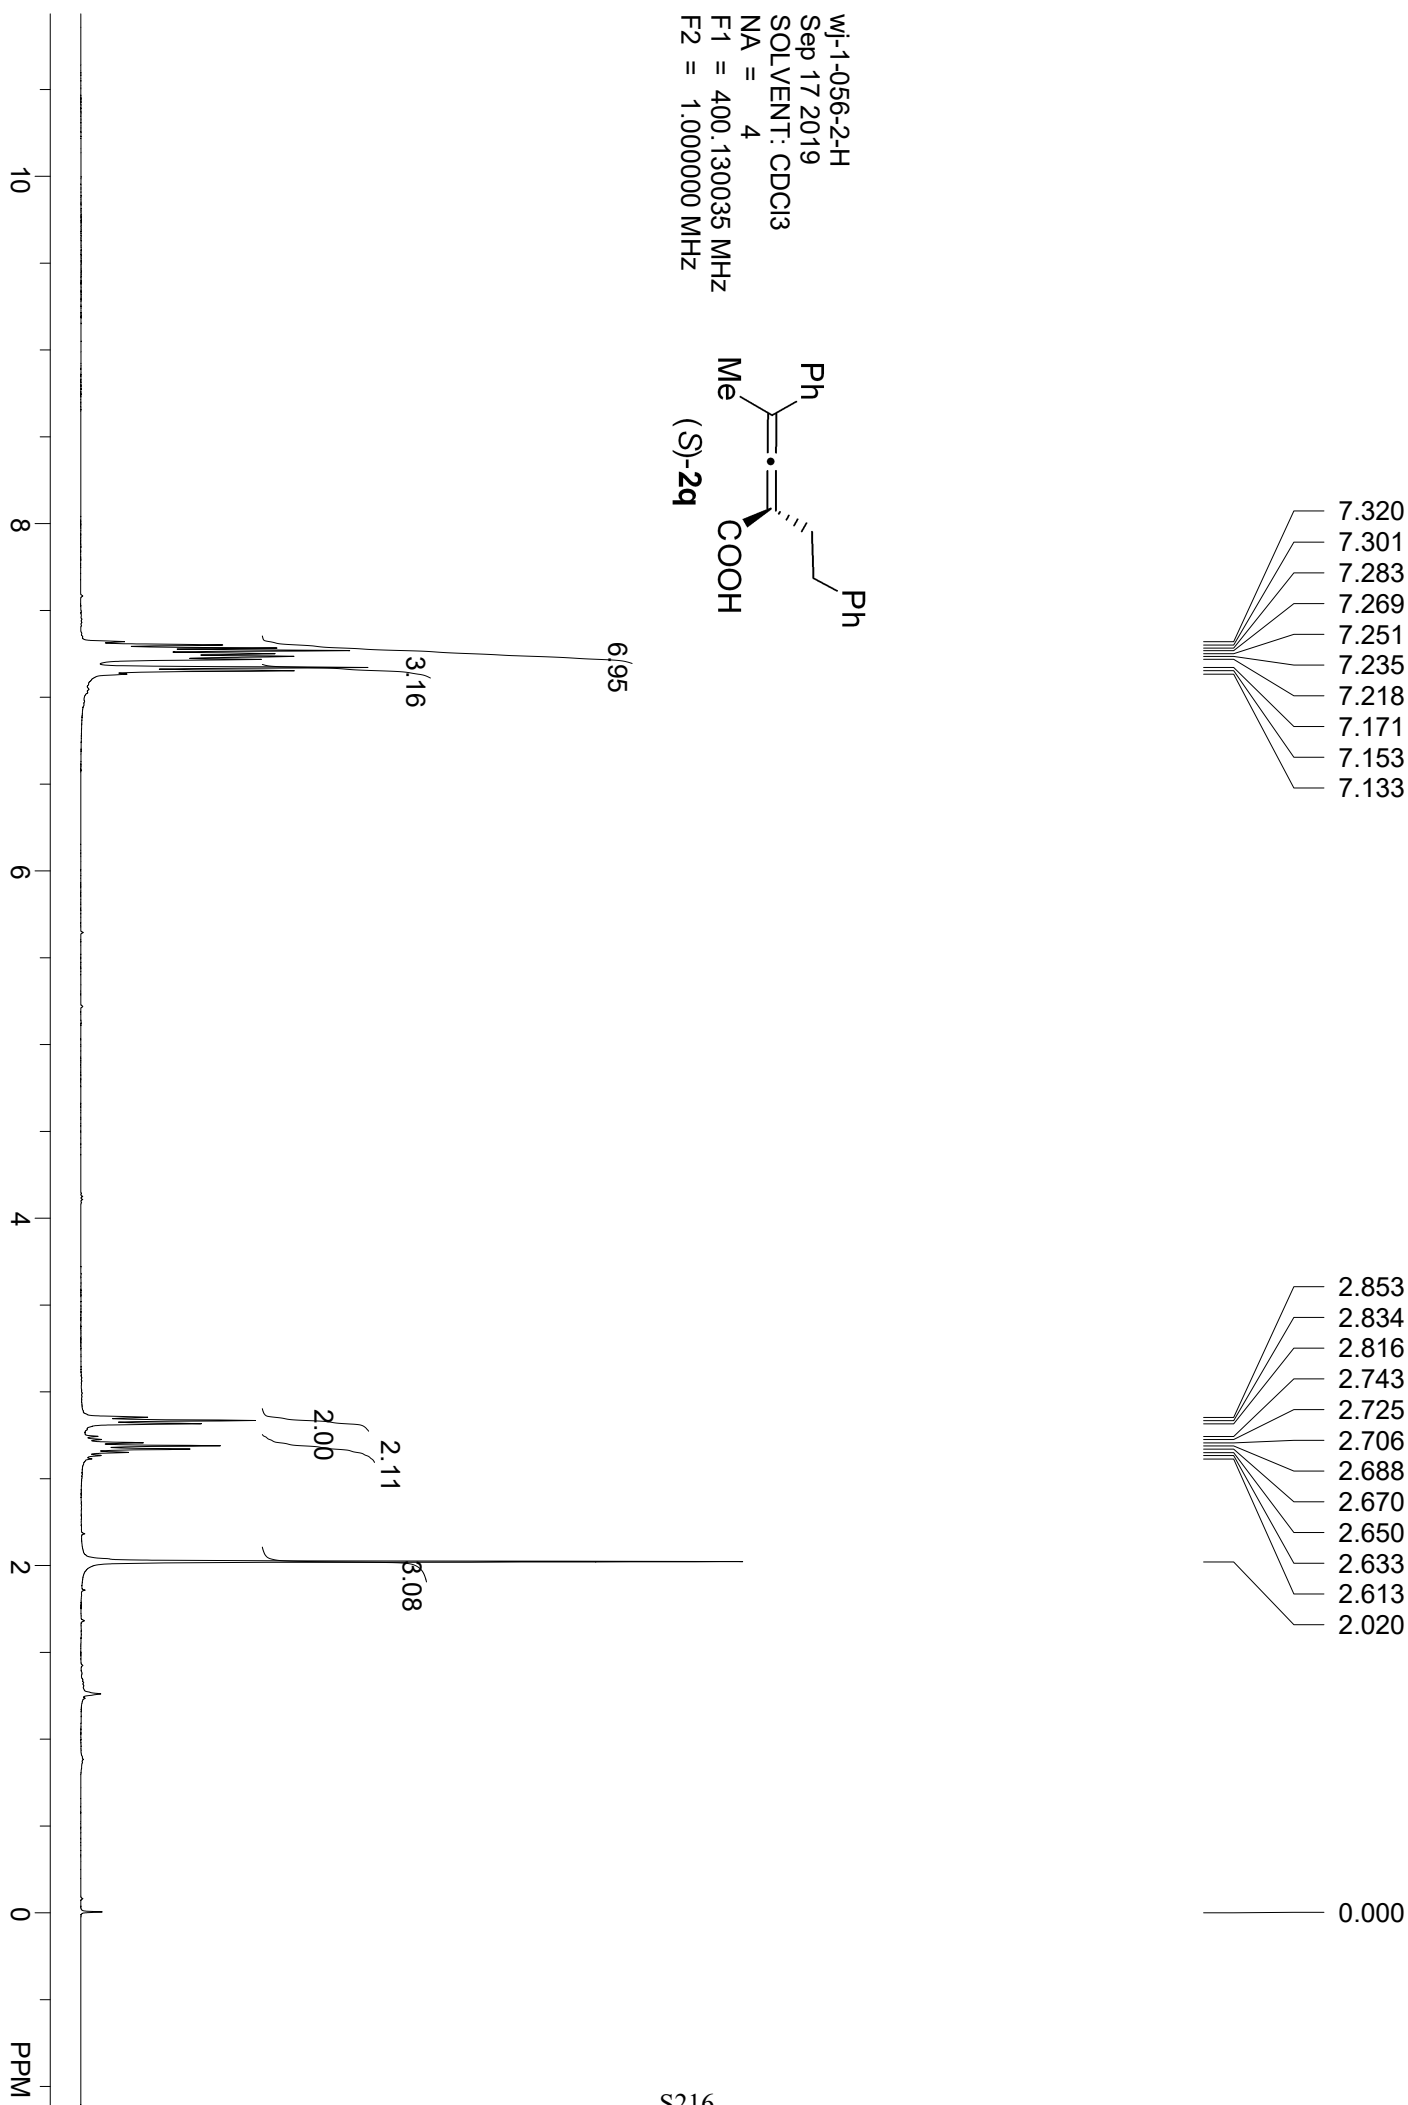



wj-1-056-2-C  
Sep 17 2019  
SOLVENT: CDCl3  
NA = 200  
F1 = 100.612770 MHz  
F2 = 1.000000 MHz

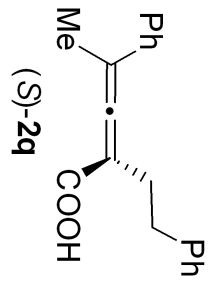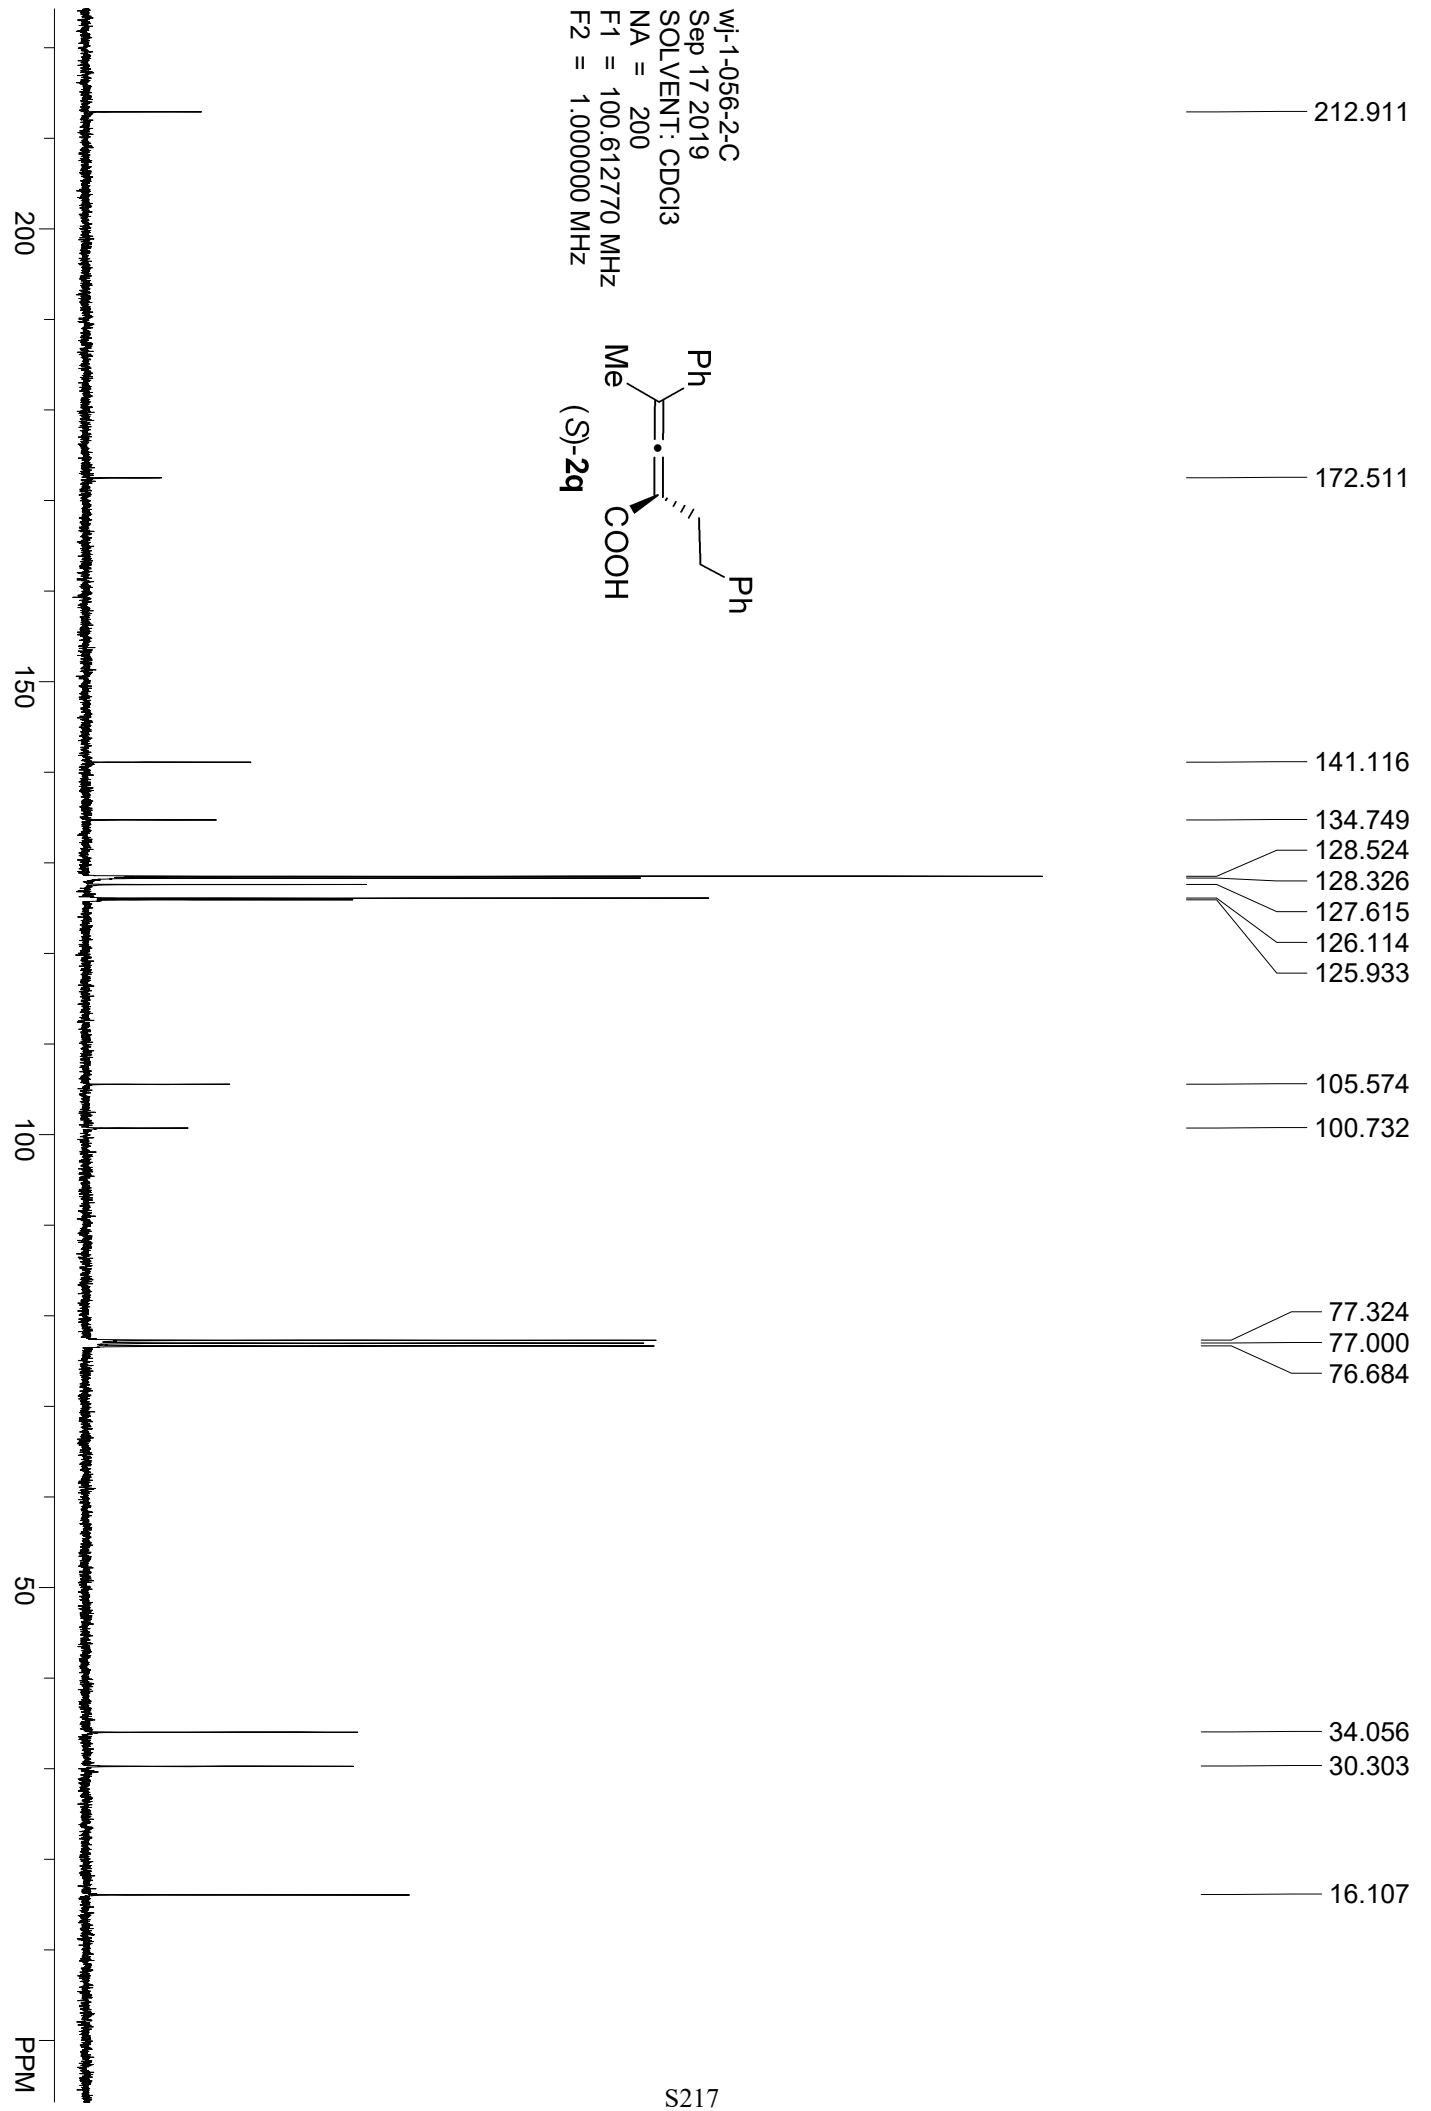

# Area Percent Report



Agilent Technologies

sample wj-1-056-2-AS-H-98-2-1.0-214

Data file: C:\Users\Public\Documents\ChemStation\1\Data\wgl 2019-09-17 09-02-49\055-P2-C3-wj-1-056-2.D

## Acquisition Data:

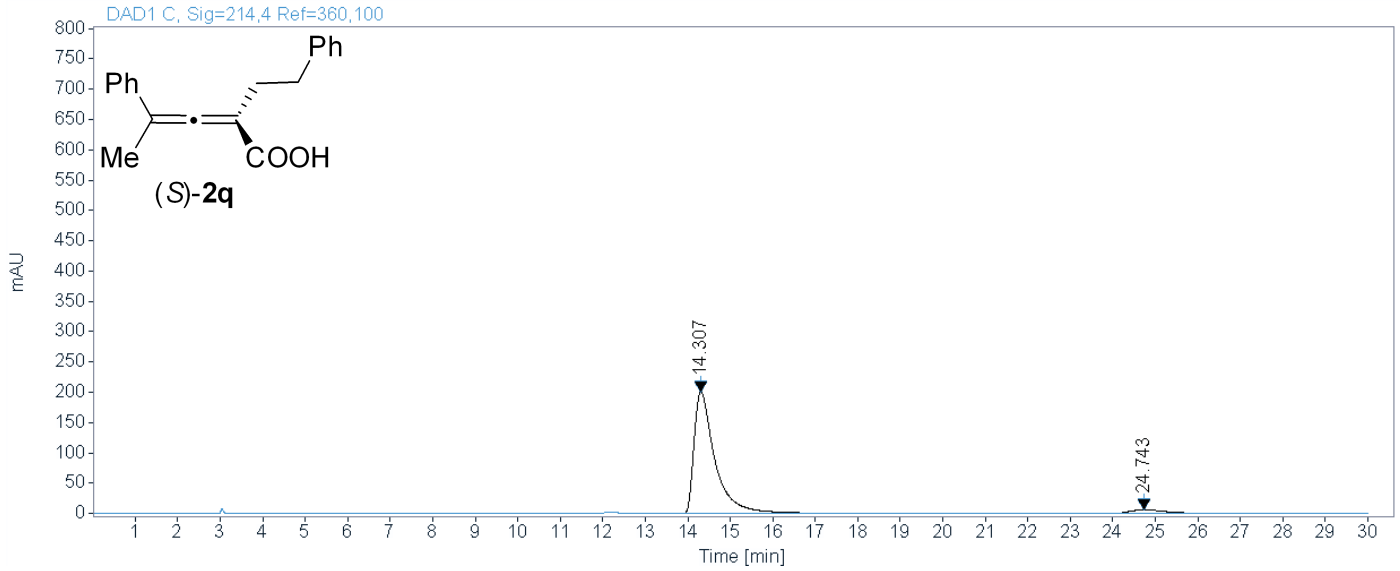

Signal: DAD1 C, Sig=214,4 Ref=360,100

| RT [min] | Width [min] | Height   | Area      | Area%    |
|----------|-------------|----------|-----------|----------|
| 14.307   | 0.5110      | 200.8281 | 6936.7827 | 95.8457  |
| 24.743   | 0.8684      | 5.7703   | 300.6647  | 4.1543   |
| Sum      |             |          | 7237.4474 | 100.0000 |

# Area Percent Report



Agilent Technologies

sample wj-1-056-2-rac-AS-H-98-2-1.0-214

Data file: C:\Users\Public\Documents\ChemStation\1\Data\wgl 2019-09-17 09-02-49\056-P2-C4-wj-1-056-2-rac.D

## Acquisition Data:

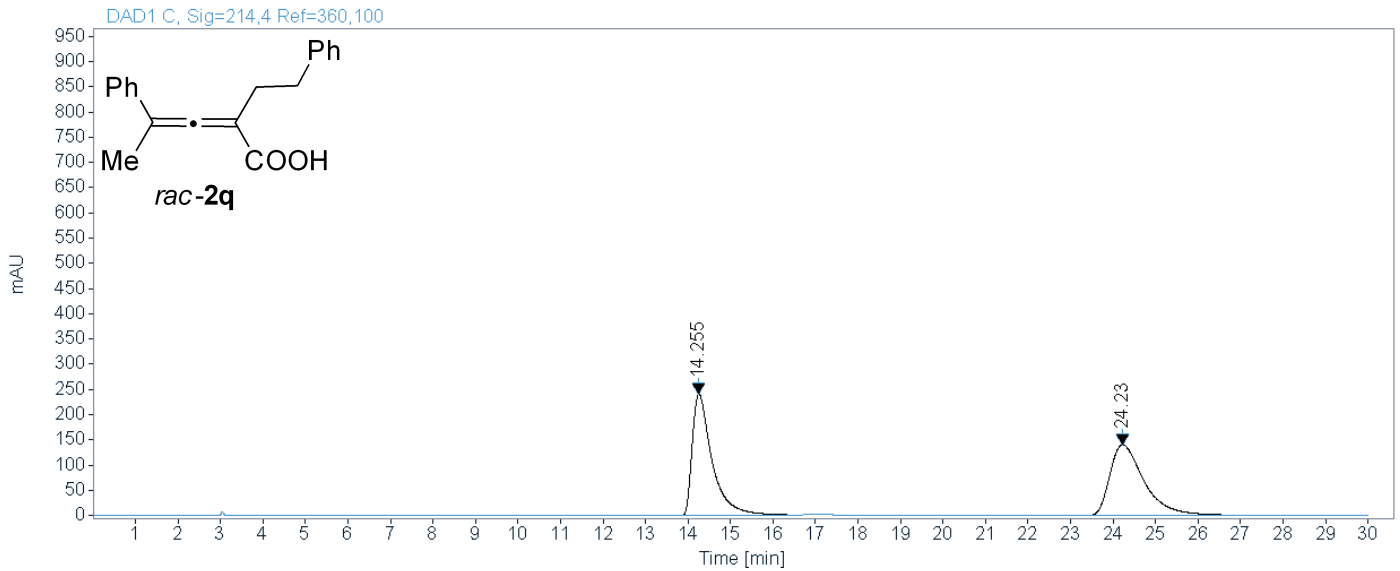

Signal: DAD1 C, Sig=214,4 Ref=360,100

| RT [min] | Width [min] | Height   | Area       | Area%    |
|----------|-------------|----------|------------|----------|
| 14.255   | 0.4842      | 241.2527 | 7861.6177  | 49.6767  |
| 24.230   | 0.8614      | 140.4720 | 7963.9458  | 50.3233  |
| Sum      |             |          | 15825.5635 | 100.0000 |

WJ-1-073-2-H  
Oct 06 2019  
SOLVENT: CDCl3  
NA = 4  
F1 = 400.130005 MHz  
F2 = 1.000000 MHz

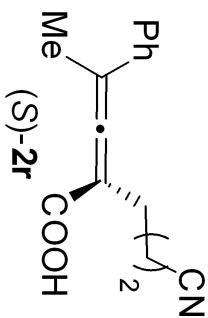

7.367  
7.356  
7.313  
7.302  
7.293  
7.281  
7.273  
7.253

2.499  
2.481  
2.462  
2.364  
2.346  
2.328  
2.218  
1.898  
1.880  
1.862  
1.843  
1.825

-0.000

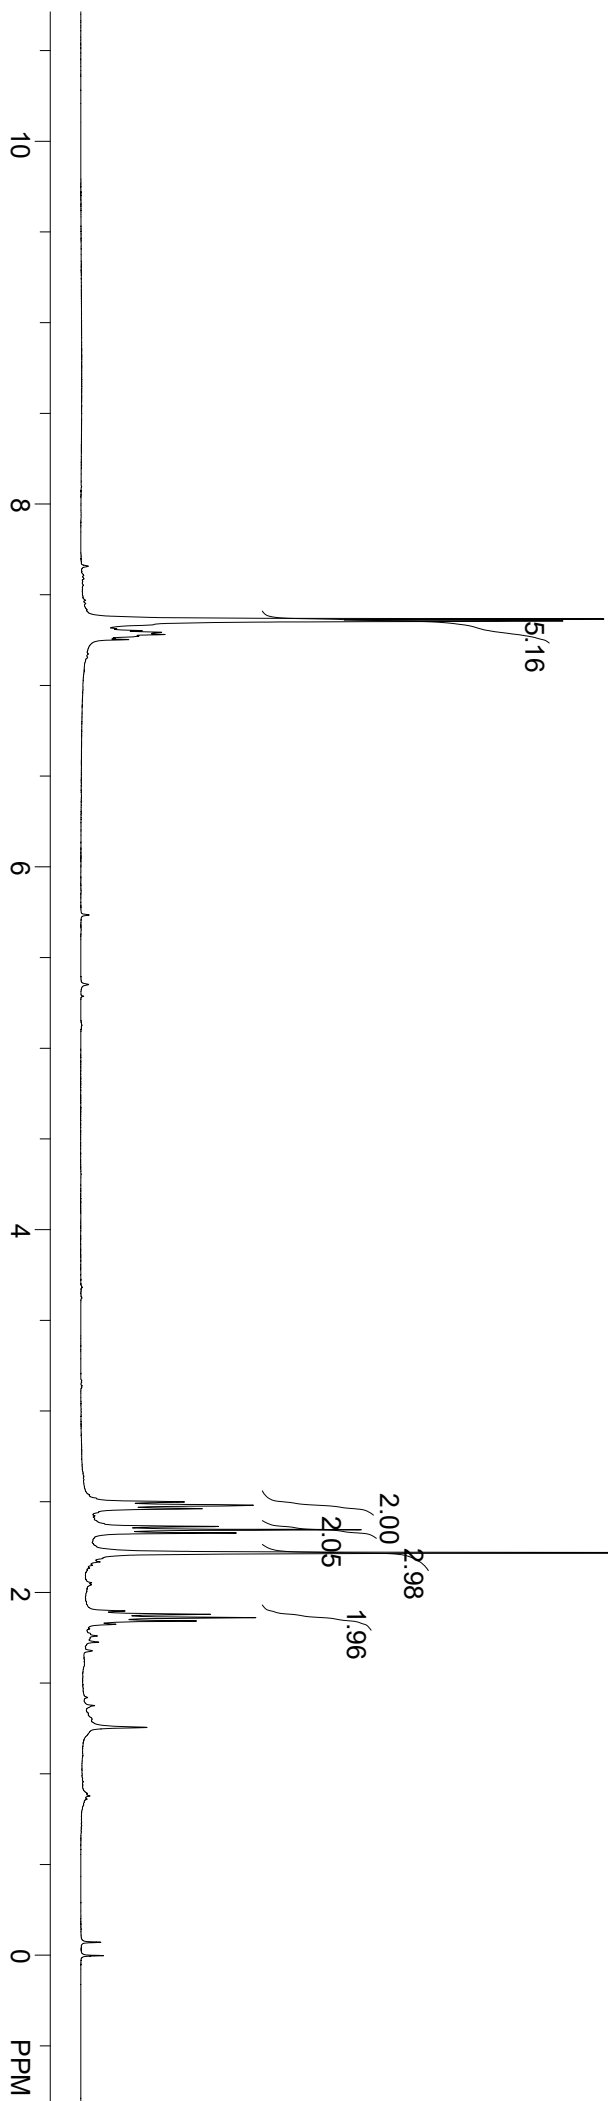

212.437

171.926

134.314

128.705

128.026

126.098

119.186

106.412

99.736

77.316

77.000

76.684

27.720

23.967

16.533

16.360

wj-1-073-2-C  
Oct 06 2019  
SOLVENT: CDCl3  
NA = 256  
F1 = 100.612770 MHz  
F2 = 1.000000 MHz

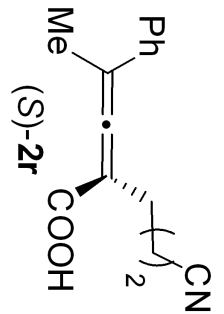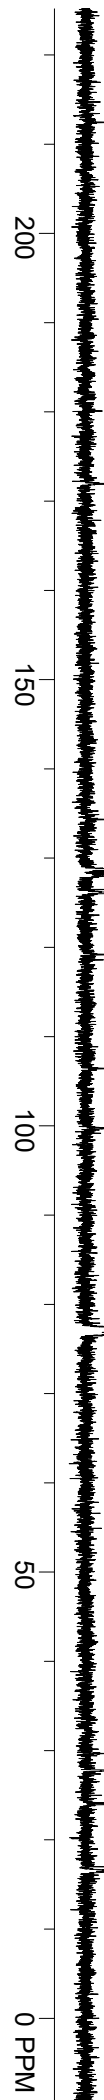

wj-1-073-2-purity  
Oct 07 2019  
SOLVENT: CDCl3  
NA = 4  
F1 = 400.130005 MHz  
F2 = 1.000000 MHz

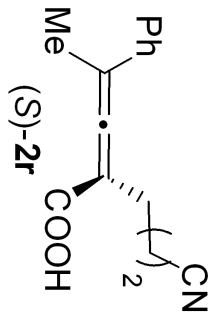

purity: CH<sub>2</sub>Br<sub>2</sub> (4.9 μL, 0.07 mmol) as  
internal standard in 17.0 mg product

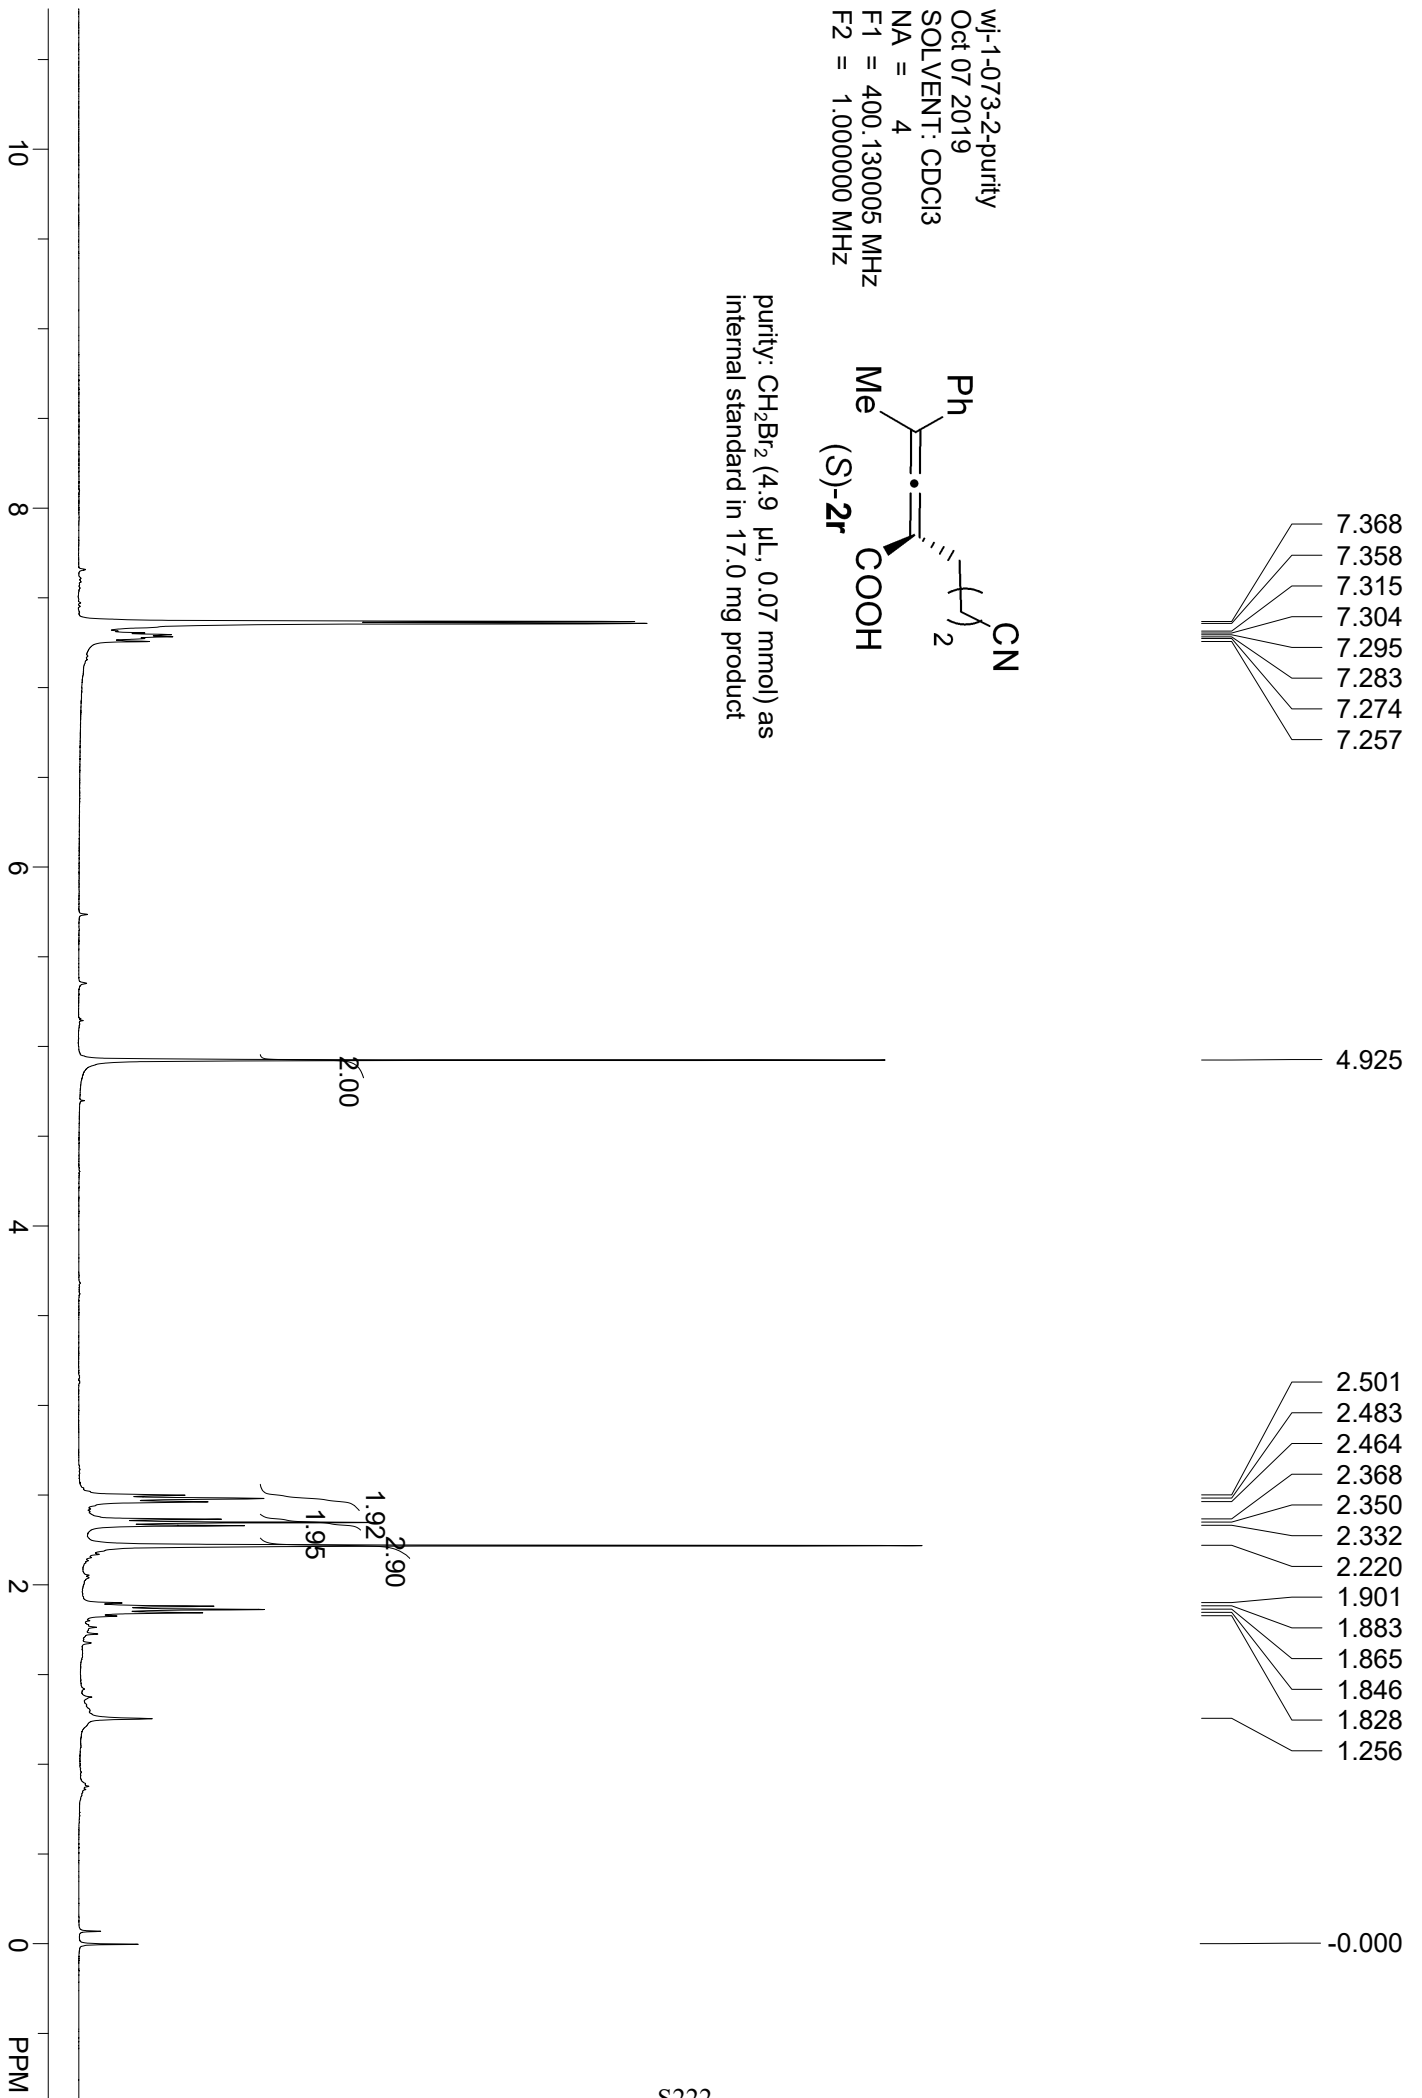

# Area Percent Report



sample wj-1-073-2-AS-H-90-10-1.0-214

Data file: C:\Users\Public\Documents\ChemStation\1\Data\zwf-allenioc acid\_LC 2019-10-06 14-14-49\022-P2-C3-wj-1-073-2.D

## Acquisition Data:

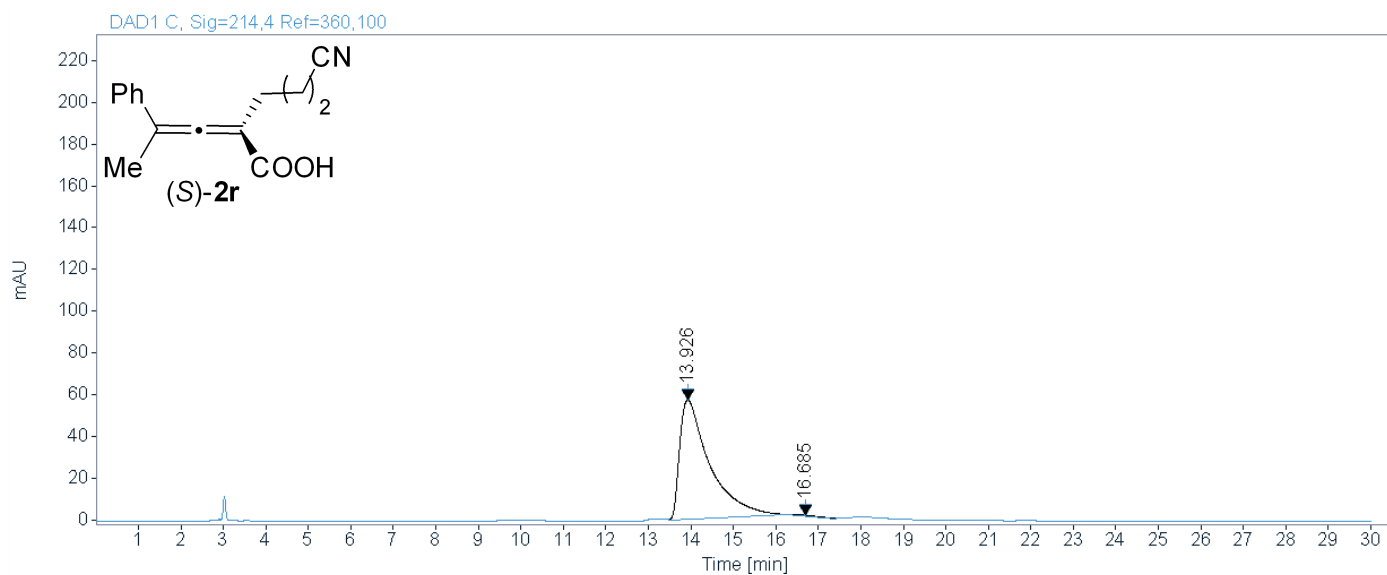

Signal: DAD1 C, Sig=214,4 Ref=360,100

| RT [min] | Width [min] | Height  | Area      | Area%    |
|----------|-------------|---------|-----------|----------|
| 13.926   | 0.8154      | 57.1405 | 2795.6130 | 99.0068  |
| 16.685   | 0.8372      | 0.5583  | 28.0436   | 0.9932   |
| Sum      |             |         | 2823.6566 | 100.0000 |

# Area Percent Report



Agilent Technologies

sample wj-1-073-2-rac-AS-H-90-10-1.0-214

Data file: C:\Users\Public\Documents\ChemStation\1\Data\zwf-allenioc acid\_LC 2019-10-06 14-14-49\023-P2-C4-wj-1-073-2-rac.D

## Acquisition Data:

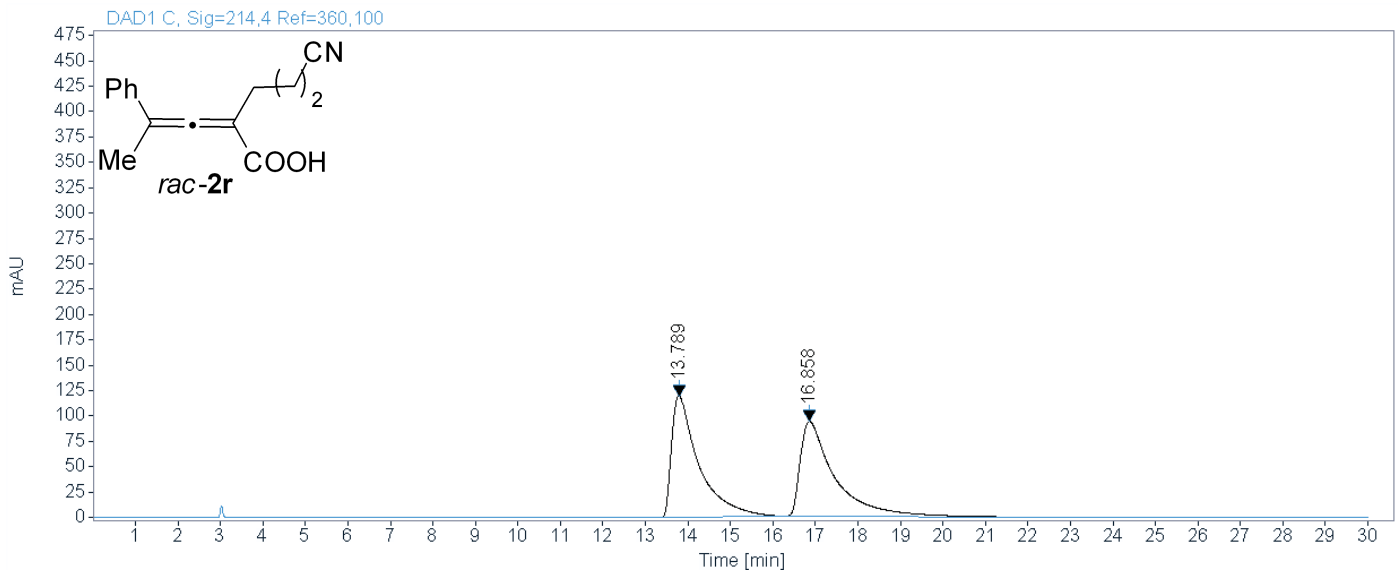

Signal: DAD1 C, Sig=214,4 Ref=360,100

| RT [min] | Width [min] | Height   | Area       | Area%    |
|----------|-------------|----------|------------|----------|
| 13.789   | 0.6321      | 119.7780 | 5298.2300  | 50.0652  |
| 16.858   | 0.8062      | 93.3867  | 5284.4390  | 49.9348  |
| Sum      |             |          | 10582.6689 | 100.0000 |



wj-1-136-H  
June 02 2020  
SOLVENT: CDCl3  
NA = 4  
F1 = 400.130005 MHz  
F2 = 1.000000 MHz

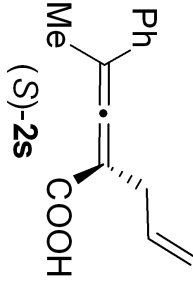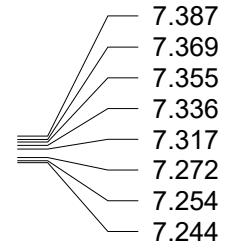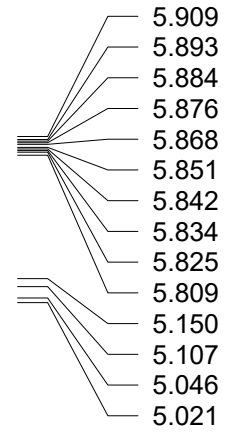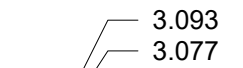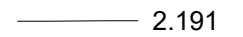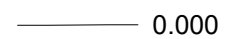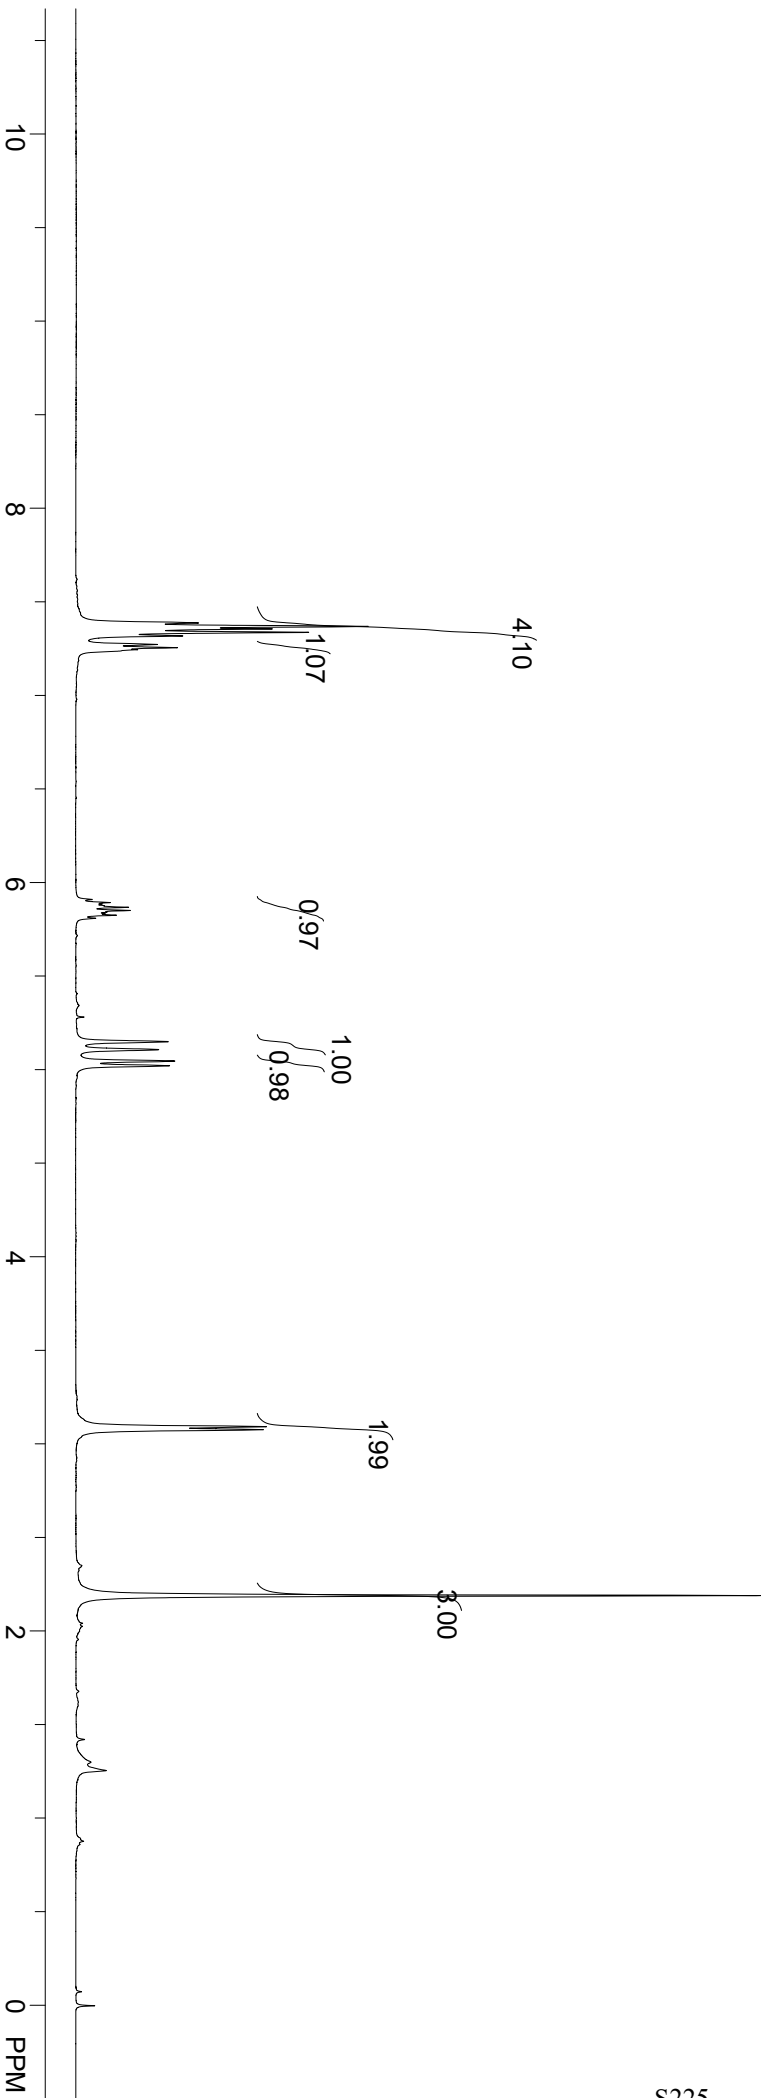

wj-1-136-C  
June 02 2020  
SOLVENT: CDCl3  
NA = 256  
F1 = 100.612770 MHz  
F2 = 1.000000 MHz

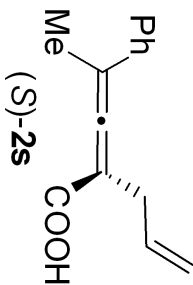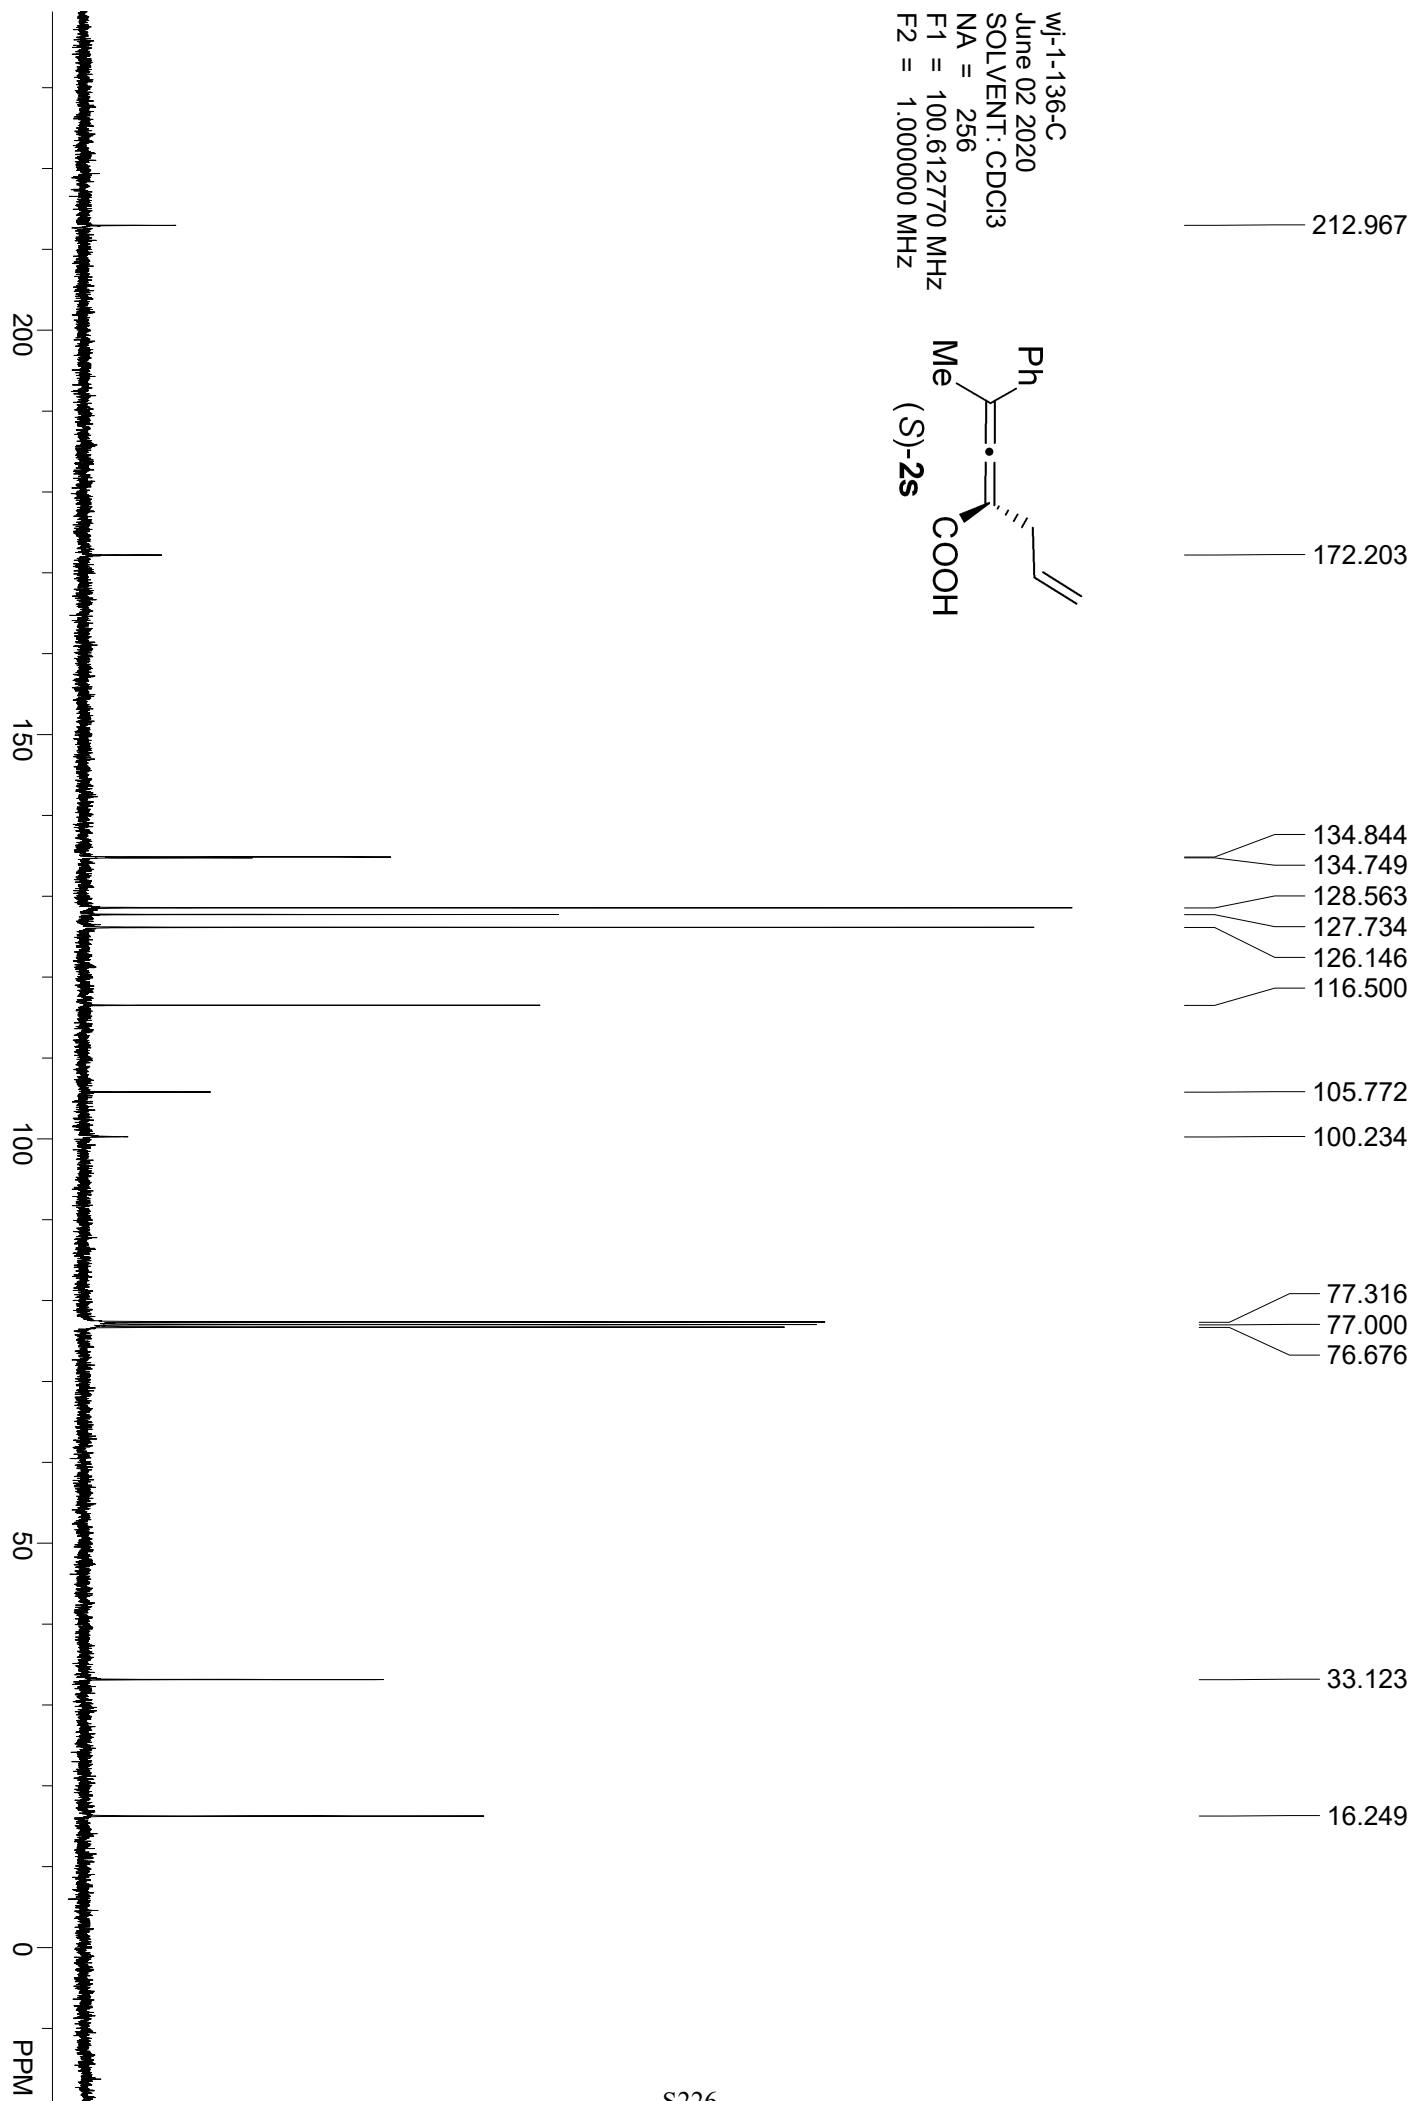

# Area Percent Report



Agilent Technologies

sample wj-1-136-AS-H-98-2-1.0-214

Data file: C:\Users\Public\Documents\ChemStation\1\Data\zwf-allenioc acid\_LC 2020-06-01 19-44-43\010-P2-C4-wj-1-136.D

## Acquisition Data:

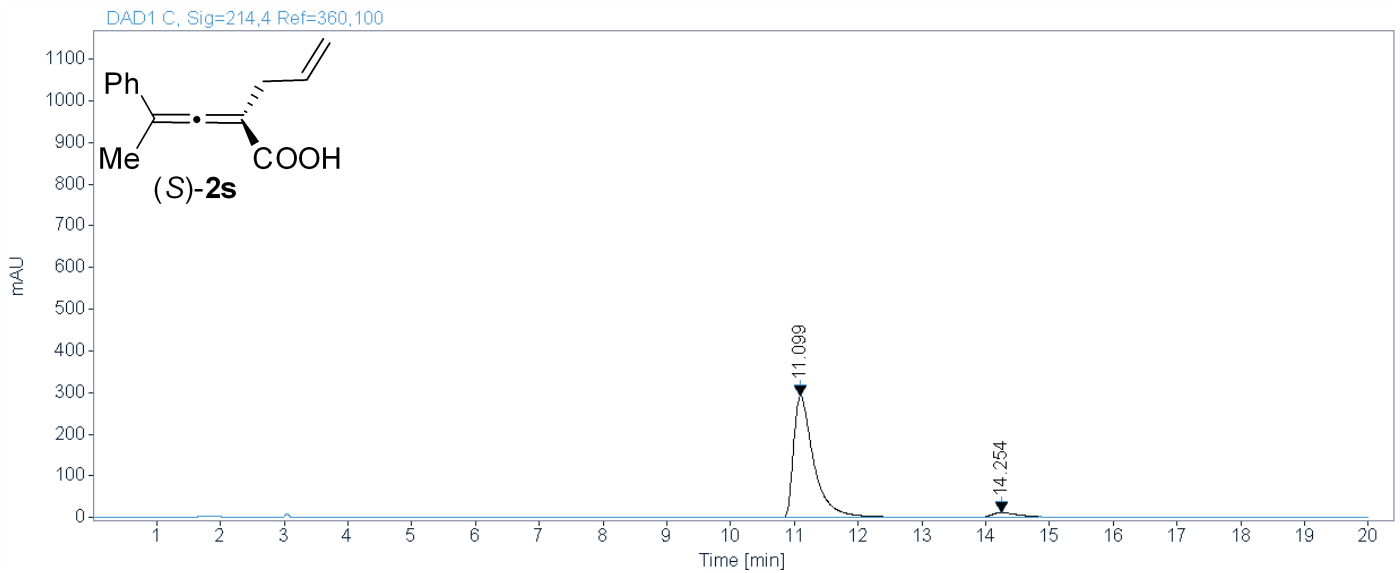

Signal: DAD1 C, Sig=214,4 Ref=360,100

| RT [min] | Width [min] | Height   | Area      | Area%    |
|----------|-------------|----------|-----------|----------|
| 11.099   | 0.3323      | 292.3181 | 6522.3804 | 94.8461  |
| 14.254   | 0.5026      | 11.7540  | 354.4257  | 5.1539   |
|          | Sum         |          | 6876.8061 | 100.0000 |

# Area Percent Report



Agilent Technologies

sample wj-1-136-rac-AS-H-98-2-1.0-214

Data file: C:\Users\Public\Documents\ChemStation\1\Data\zwf-allenioc acid\_LC 2020-06-01 19-44-43\011-P2-C5-wj-1-136-rac.D

## Acquisition Data:

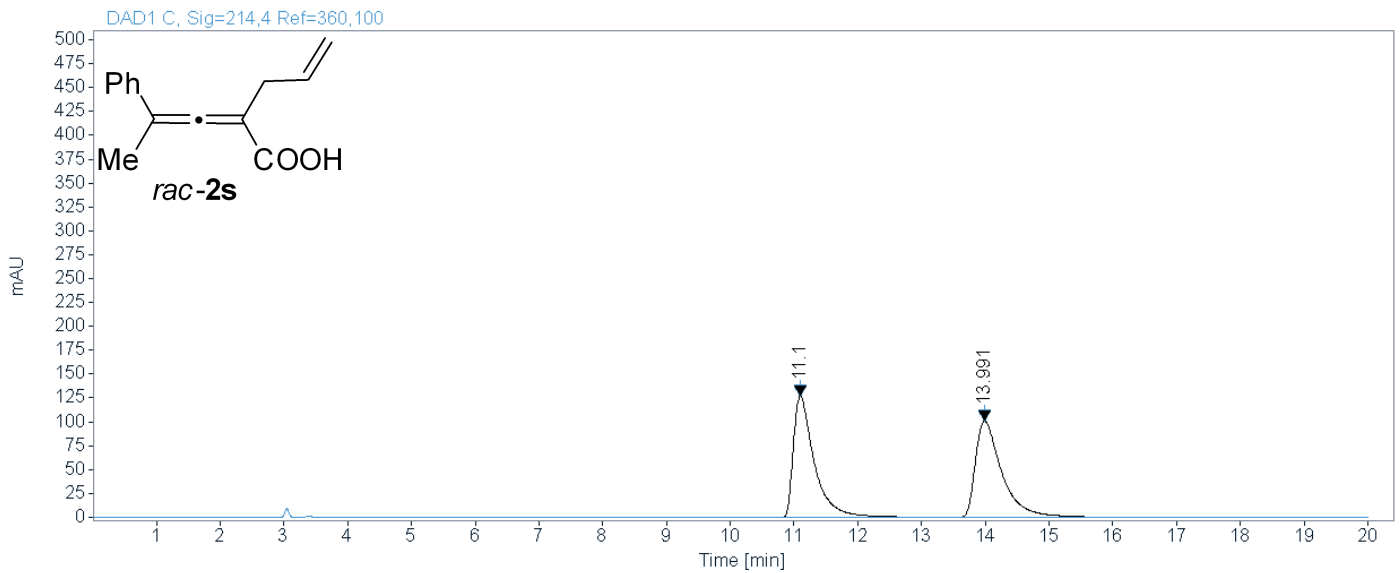

Signal: DAD1 C, Sig=214,4 Ref=360,100

| RT [min] | Width [min] | Height   | Area      | Area%    |
|----------|-------------|----------|-----------|----------|
| 11.100   | 0.3417      | 127.4330 | 2945.4487 | 50.4505  |
| 13.991   | 0.4312      | 100.6969 | 2892.8433 | 49.5495  |
| Sum      |             |          | 5838.2920 | 100.0000 |

wj-1-115-2-H  
Nov 16 2019  
SOLVENT: CDCl3  
NA = 4  
F1 = 400.130005 MHz  
F2 = 1.000000 MHz

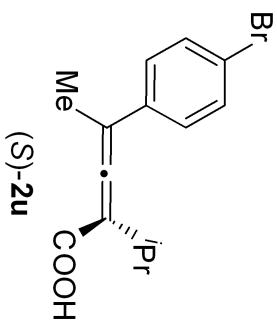

7.472  
7.450  
7.261  
7.239

2.848  
2.831  
2.814  
2.797  
2.780  
2.763  
2.746  
2.179

1.102  
1.085

-0.000

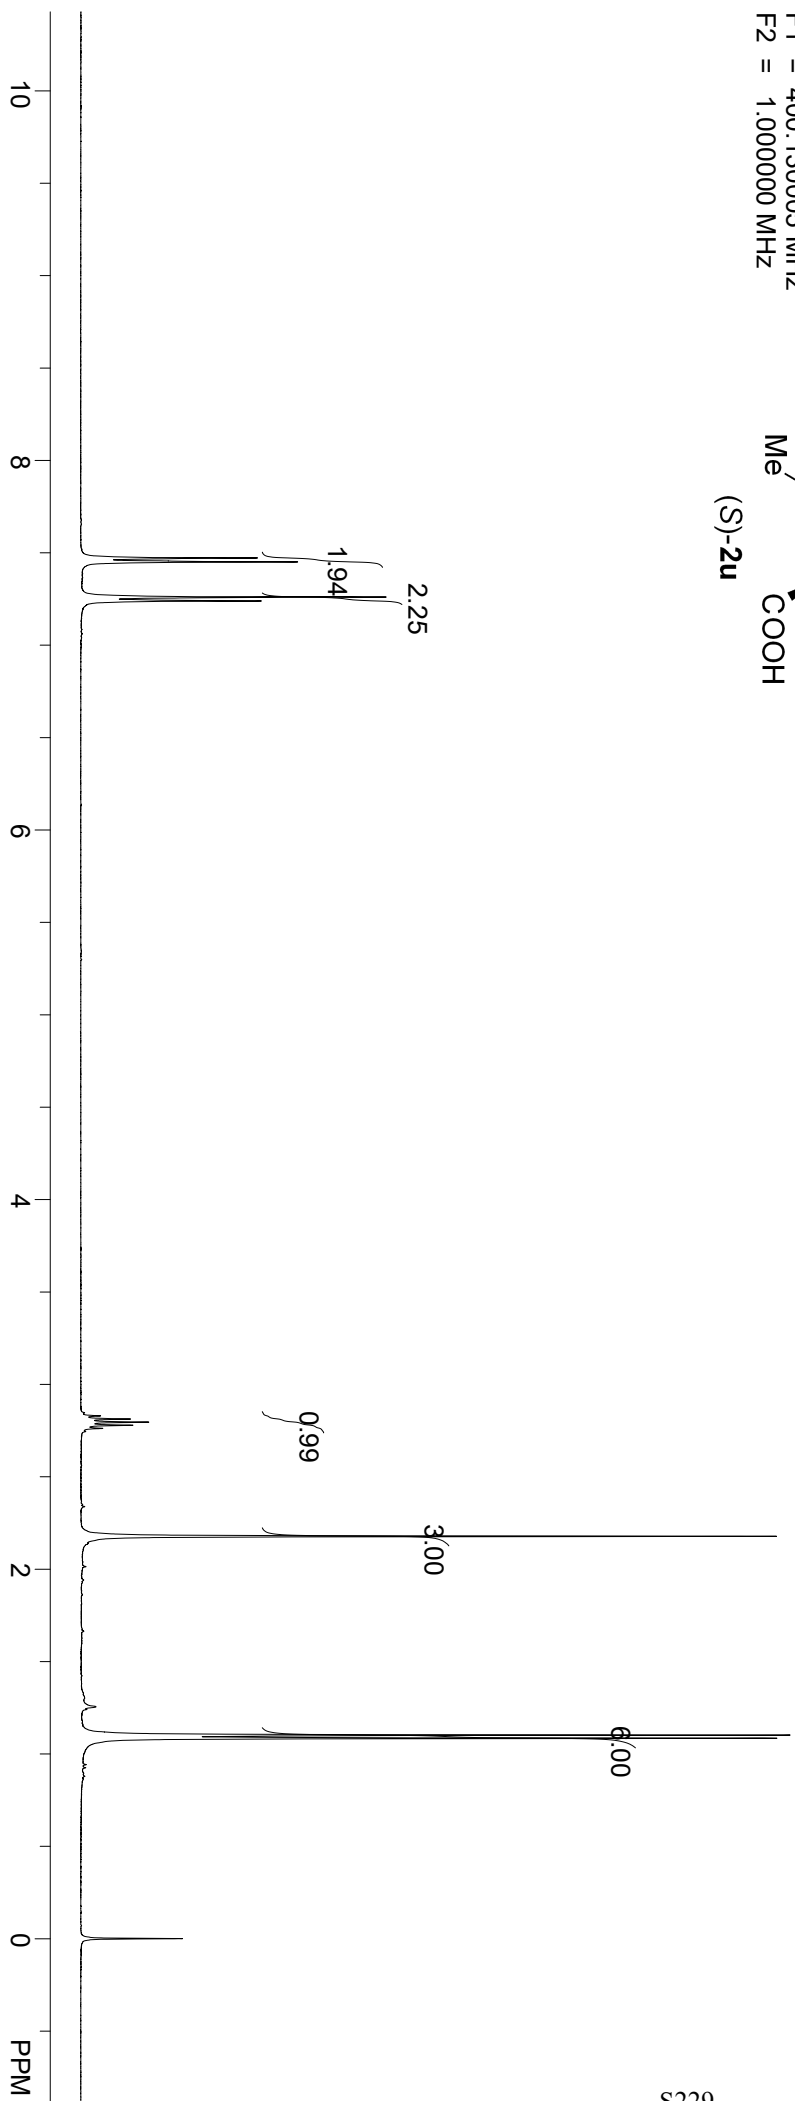

211.276

172.021

133.991

131.692

127.457

121.548

108.995

105.874

77.316

77.000

76.676

28.233

22.127

22.056

16.265

WJ-1-115-2-C  
Nov 16 2019  
SOLVENT: CDCl3  
NA = 256  
F1 = 100.612770 MHz  
F2 = 1.000000 MHz

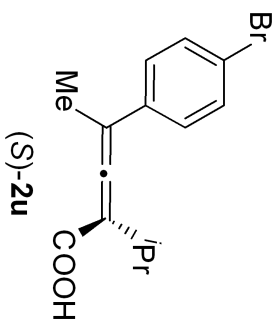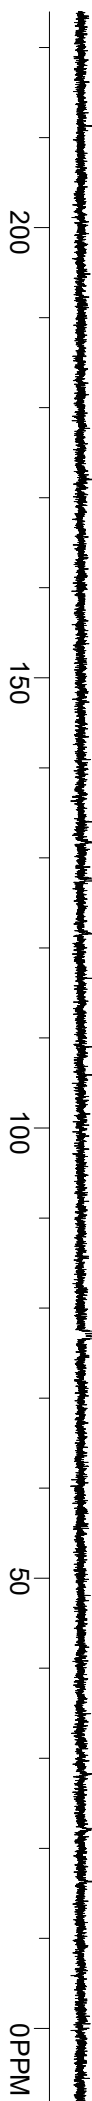

# Area Percent Report



Agilent Technologies

sample wj-1-115-2-AS-H-98-2-1.0-214

Data file: C:\Users\Public\Documents\ChemStation\1\Data\zwf-allenioc acid\_LC 2019-11-15 20-57-54\012-P2-C5-wj-1-115-2.D

## Acquisition Data:

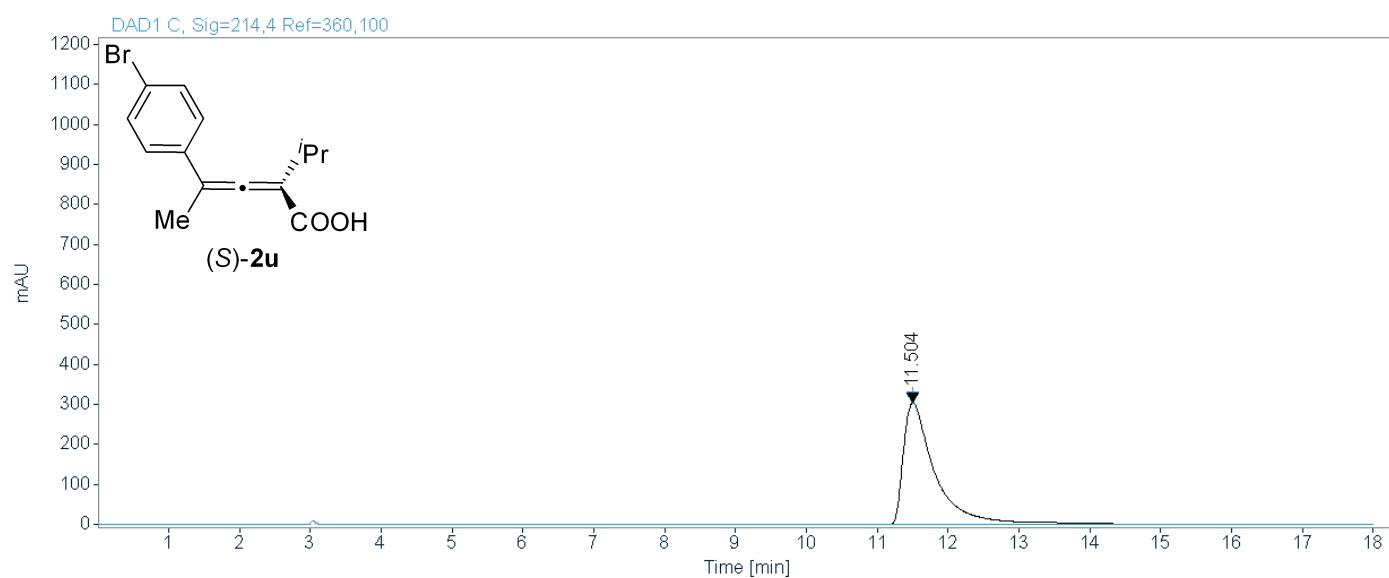

Signal: DAD1 C, Sig=214,4 Ref=360,100

| RT [min] | Width [min] | Height   | Area      | Area%    |
|----------|-------------|----------|-----------|----------|
| 11.504   | 0.4649      | 304.5253 | 9734.5674 | 100.0000 |
| Sum      |             |          | 9734.5674 | 100.0000 |

# Area Percent Report



Agilent Technologies

sample wj-1-115-2-rac-AS-H-98-2-1.0-214

Data file: C:\Users\Public\Documents\ChemStation\1\Data\zwf-allenioc acid\_LC 2019-11-15 20-57-54\013-P2-C6-wj-1-115-2-rac.D

## Acquisition Data:

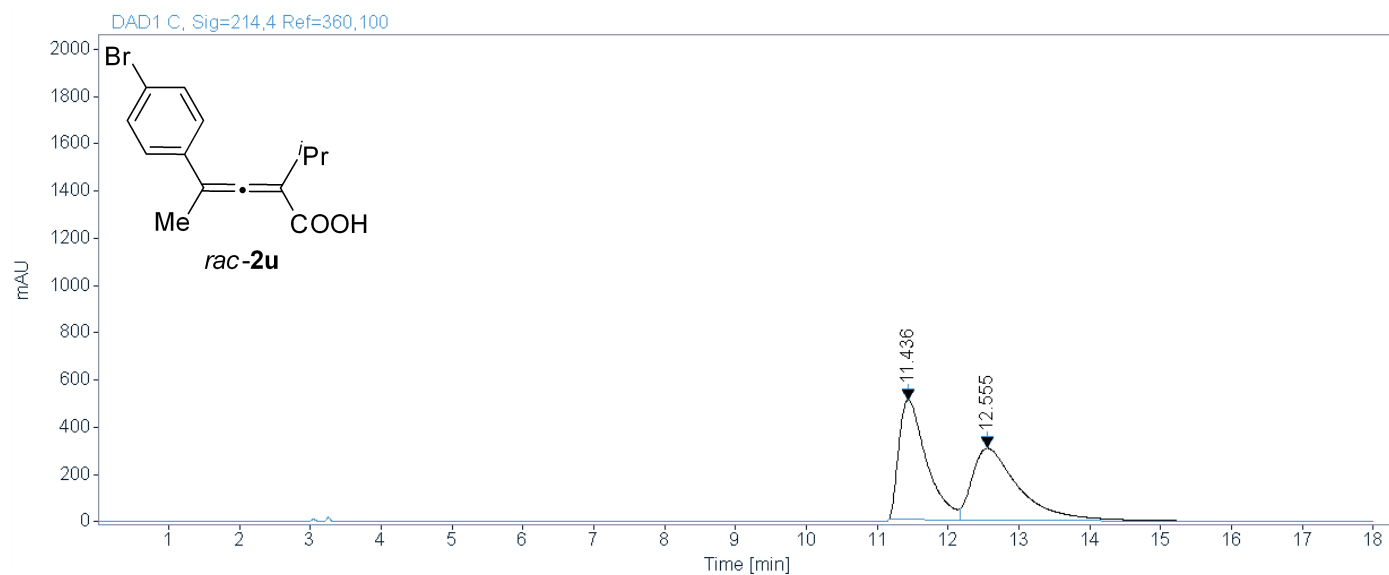

Signal: DAD1 C, Sig=214,4 Ref=360,100

| RT [min] | Width [min] | Height   | Area       | Area%    |
|----------|-------------|----------|------------|----------|
| 11.436   | 0.4525      | 506.3639 | 13748.8301 | 49.6833  |
| 12.555   | 0.7652      | 303.2699 | 13924.1279 | 50.3167  |
|          |             | Sum      | 27672.9580 | 100.0000 |



wj-1-083-2-H  
Oct 15 2019  
SOLVENT: CDCl3  
NA = 4  
F1 = 400.130005 MHz  
F2 = 1.000000 MHz

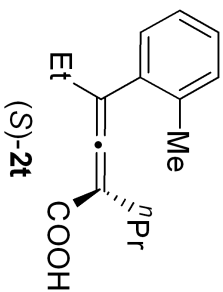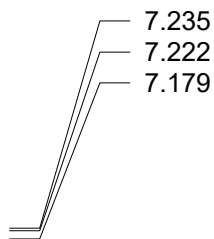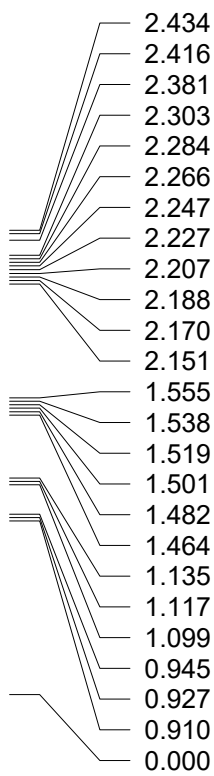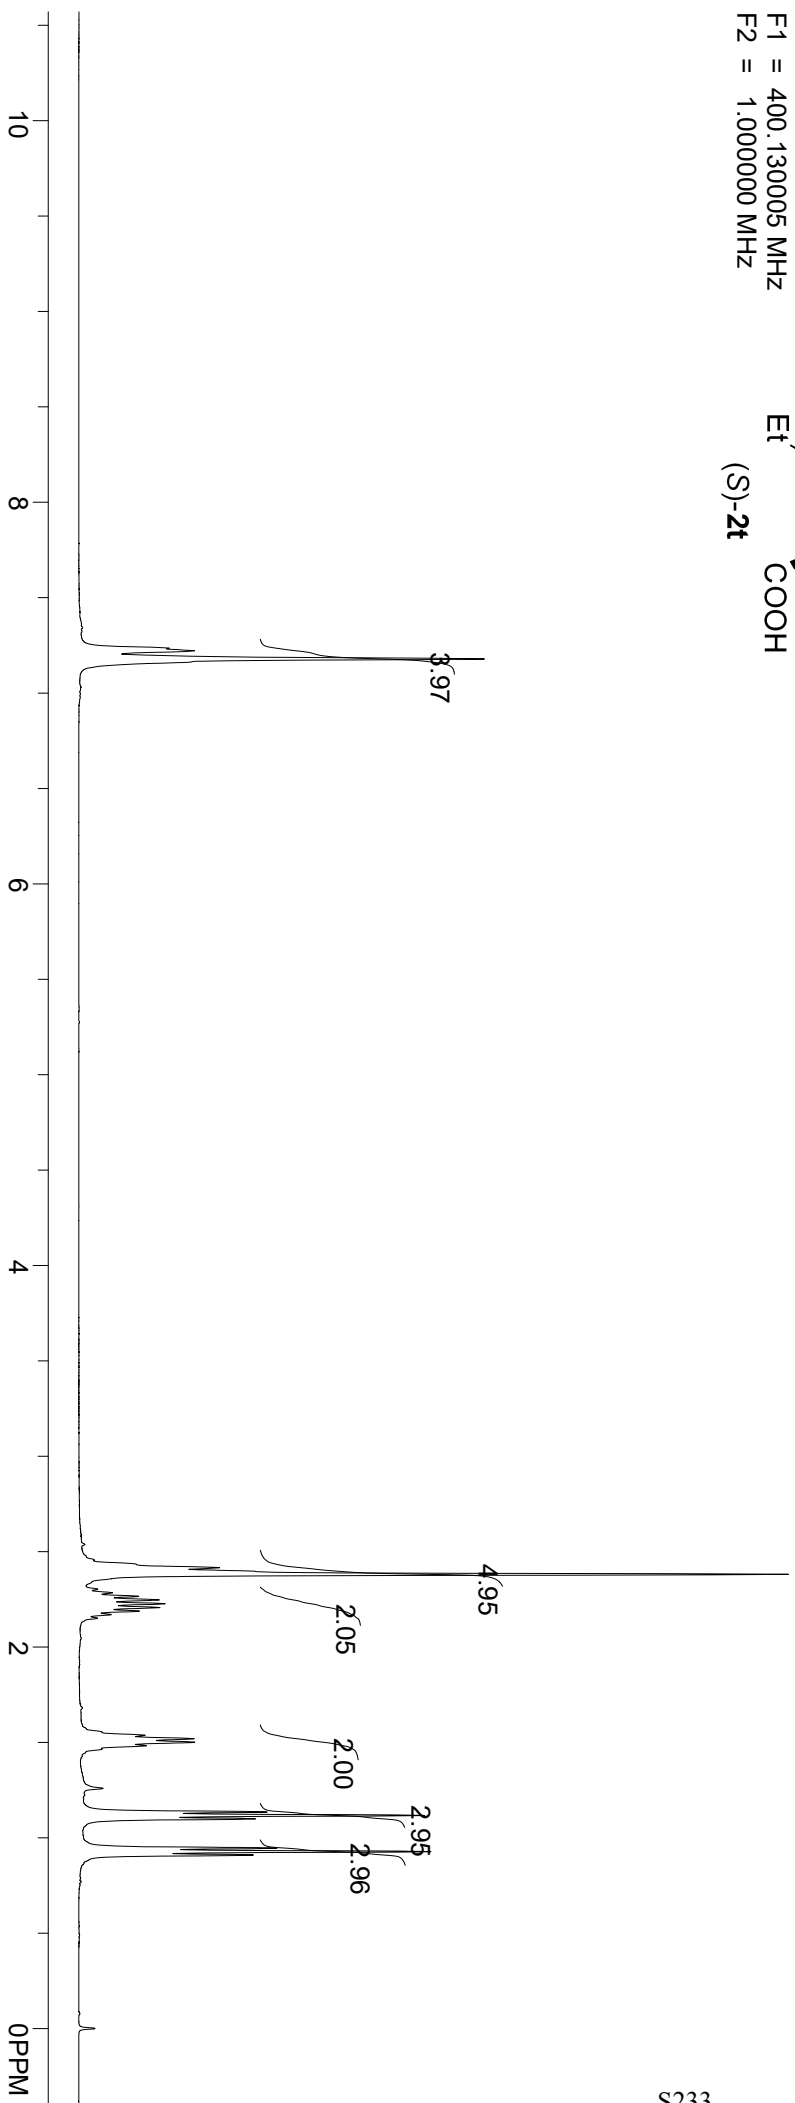

wj-1-083-2-C  
Oct 15 2019  
SOLVENT: CDCl3  
NA = 200  
F1 = 100.612770 MHz  
F2 = 1.000000 MHz

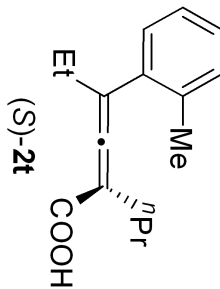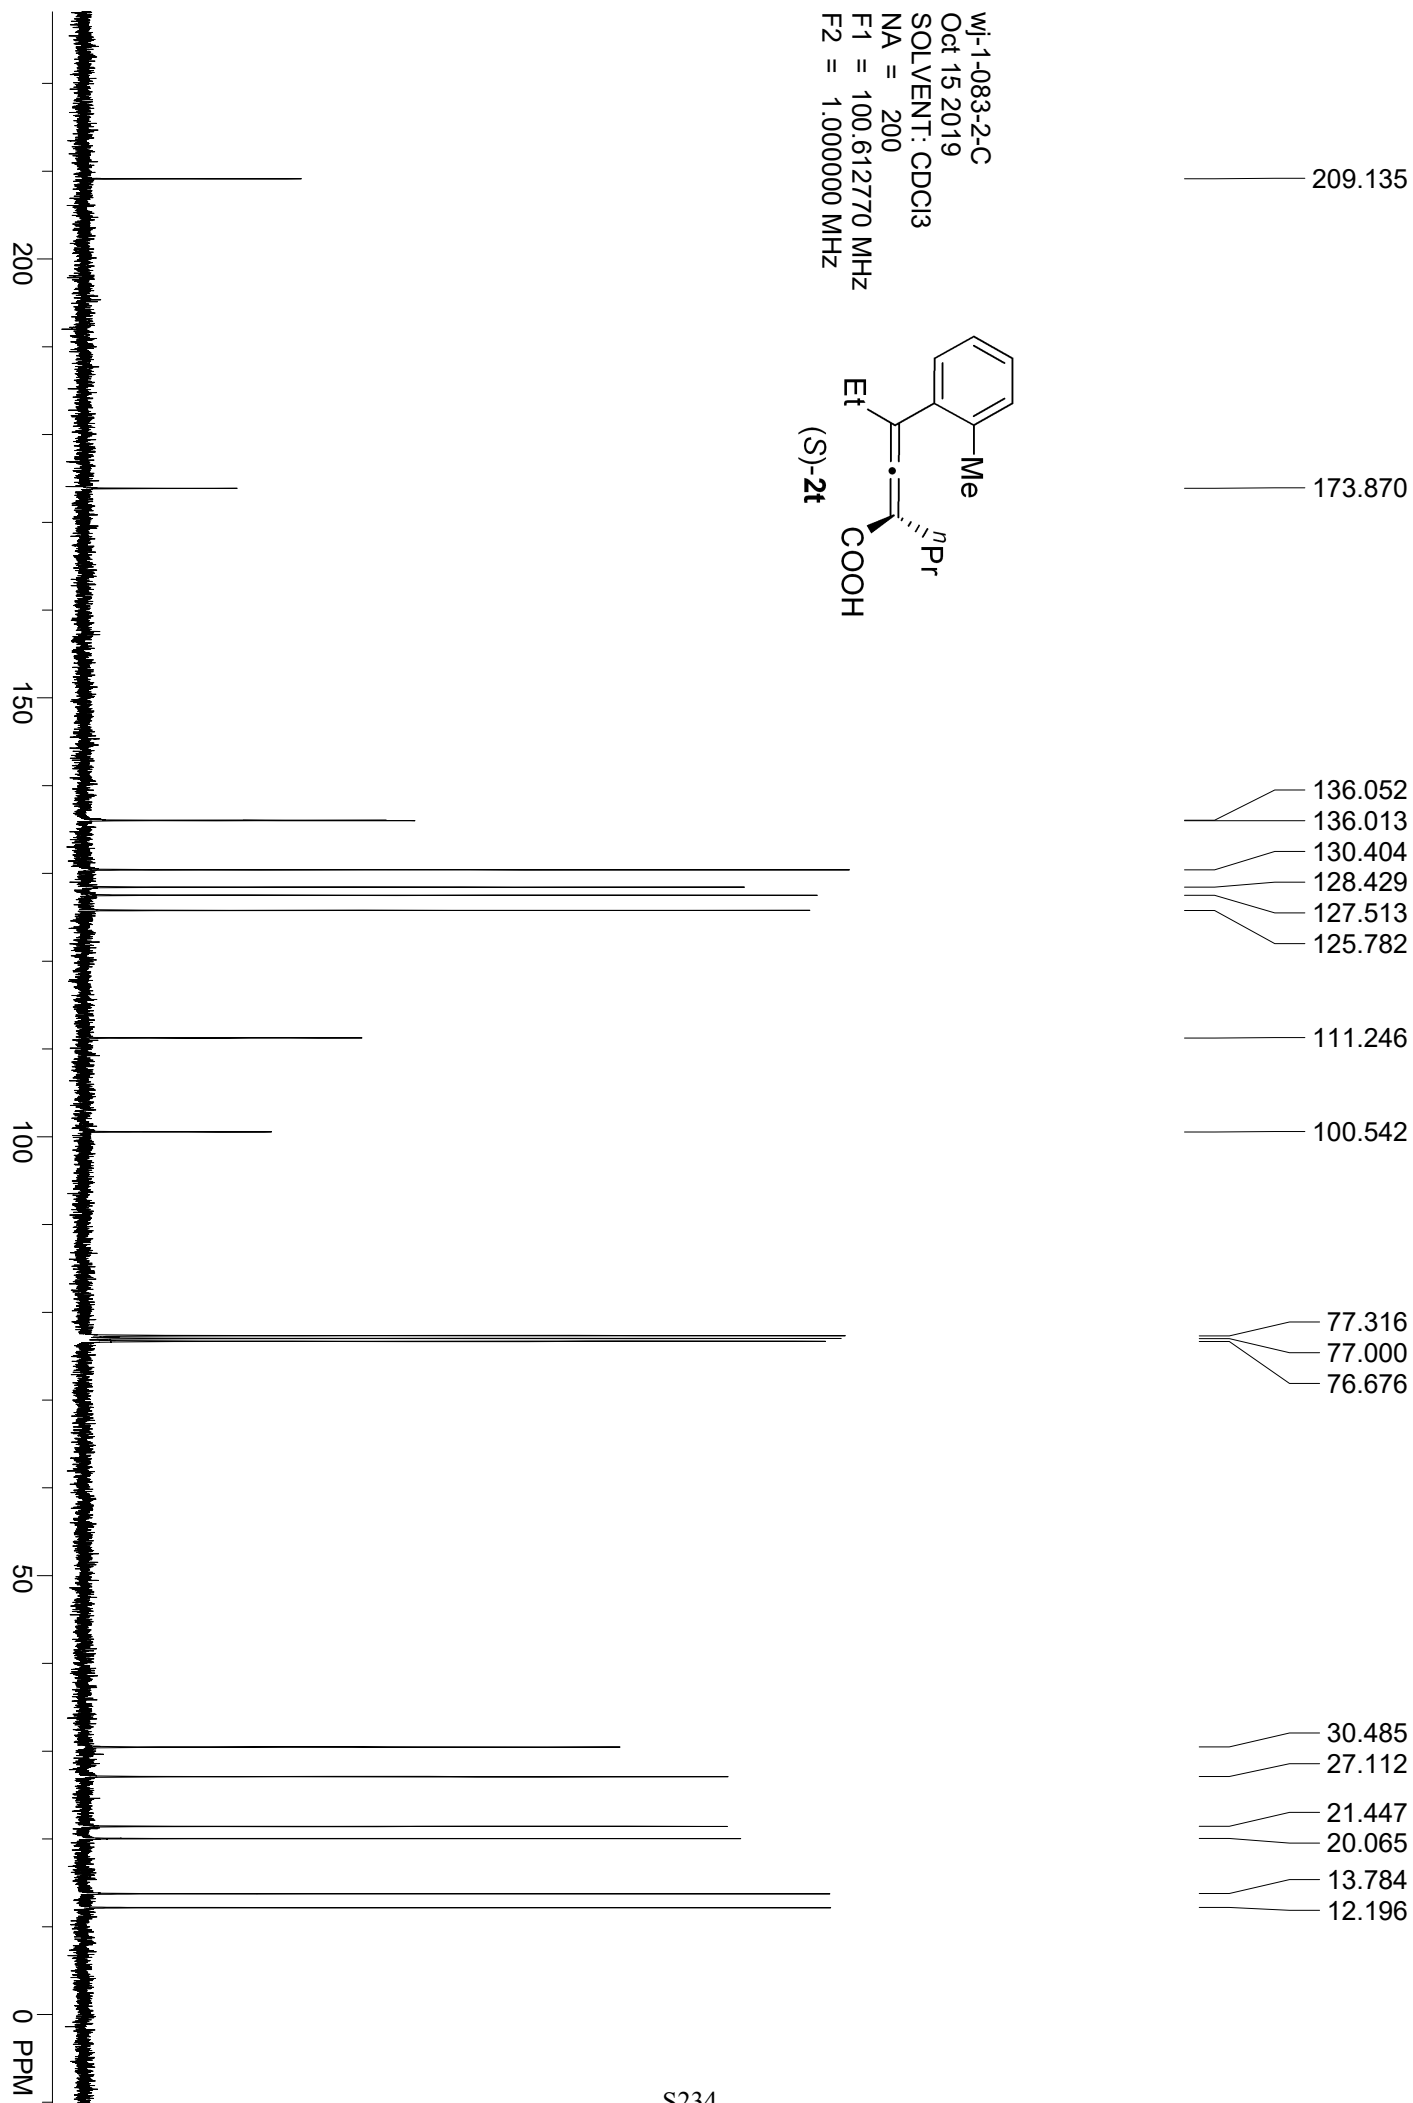

# Area Percent Report



Agilent Technologies

sample wj-1-083-2-AS-H-98-2-1.0-214

Data file: C:\Users\Public\Documents\ChemStation\1\Data\YuanYuan 2019-10-15 19-00-21\026-P2-C3-wj-1-083-2.D

## Acquisition Data:

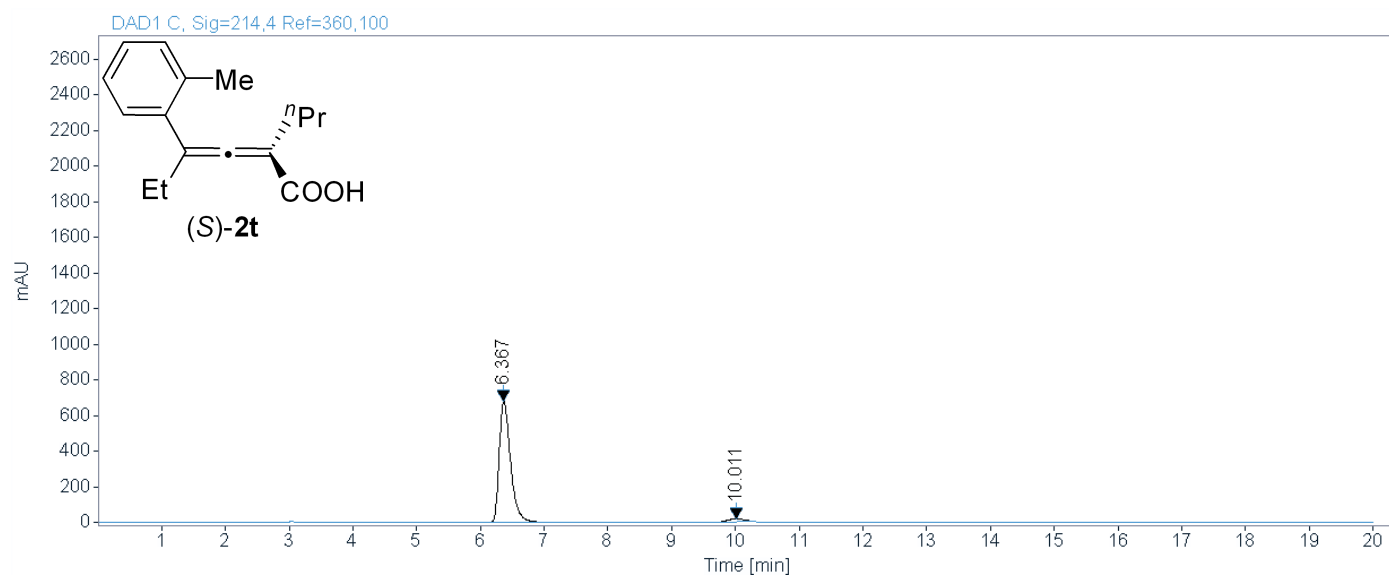

Signal: DAD1 C, Sig=214,4 Ref=360,100

| RT [min] | Width [min] | Height   | Area      | Area%    |
|----------|-------------|----------|-----------|----------|
| 6.367    | 0.2071      | 684.2971 | 8504.6465 | 95.9428  |
| 10.011   | 0.3225      | 18.5866  | 359.6418  | 4.0572   |
|          | Sum         |          | 8864.2883 | 100.0000 |

# Area Percent Report



sample wj-1-083-2-rac-AS-H-98-2-1.0-214

Data file: C:\Users\Public\Documents\ChemStation\1\Data\YuanYuan 2019-10-15 19-00-21\027-P2-C4-wj-1-083-2-rac.D

## Acquisition Data:

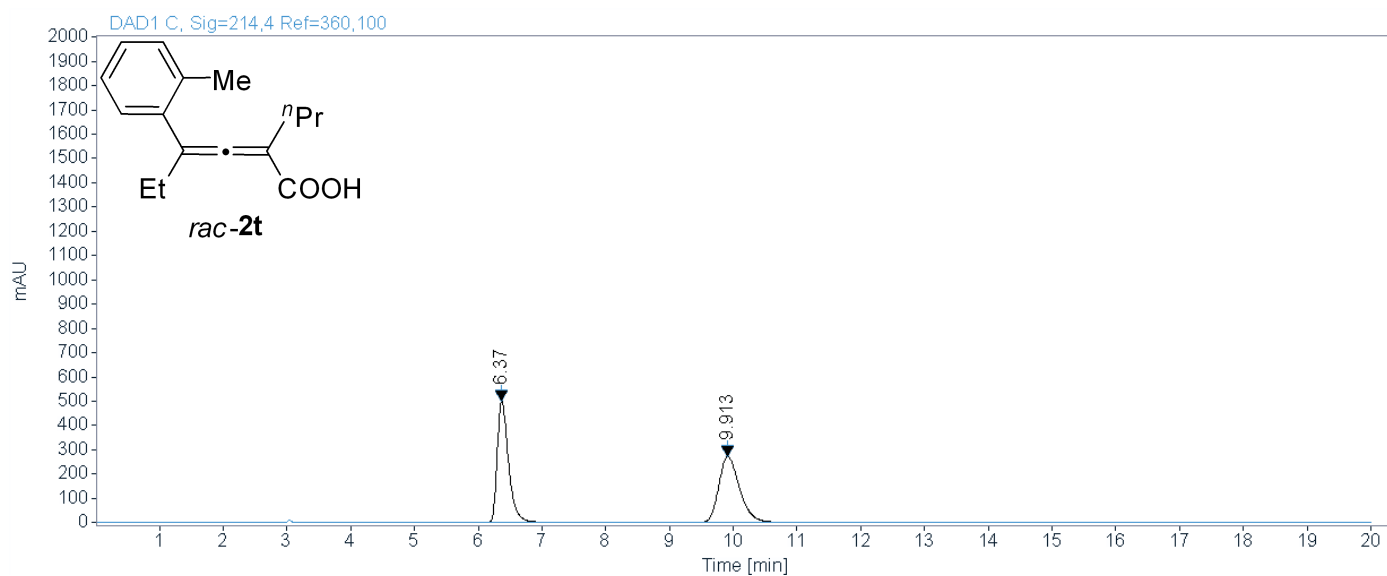

Signal: DAD1 C, Sig=214,4 Ref=360,100

| RT [min] | Width [min] | Height   | Area       | Area%    |
|----------|-------------|----------|------------|----------|
| 6.370    | 0.1890      | 501.8834 | 6236.6787  | 50.1961  |
| 9.913    | 0.3523      | 271.1423 | 6187.9565  | 49.8039  |
| Sum      |             |          | 12424.6353 | 100.0000 |

7.238  
7.225  
7.217  
7.210  
7.190  
7.182  
7.164

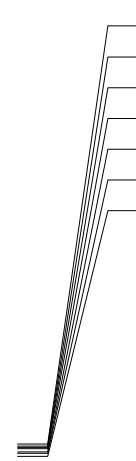

2.439  
2.431  
2.420  
2.412  
2.401  
2.394  
2.381  
2.305  
2.287  
2.271  
2.266  
2.249  
2.242  
2.225  
2.222  
2.205  
2.186  
1.485  
1.479  
1.467  
1.462  
1.458  
1.451  
1.446  
1.440  
1.429  
1.424  
1.387  
1.369  
1.351  
1.333  
1.314  
1.296  
1.135  
1.117  
1.099  
0.918  
0.900  
0.882  
0.000

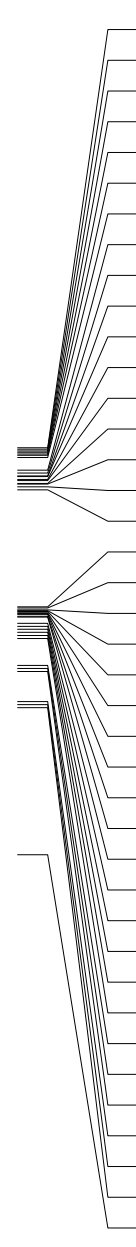

wj-1-112-2-H  
Nov 12 2019  
SOLVENT: CDCl3  
NA = 4  
F1 = 400.130005 MHz  
F2 = 1.000000 MHz

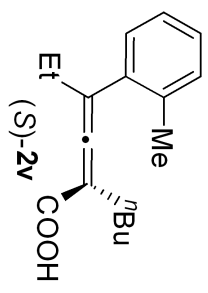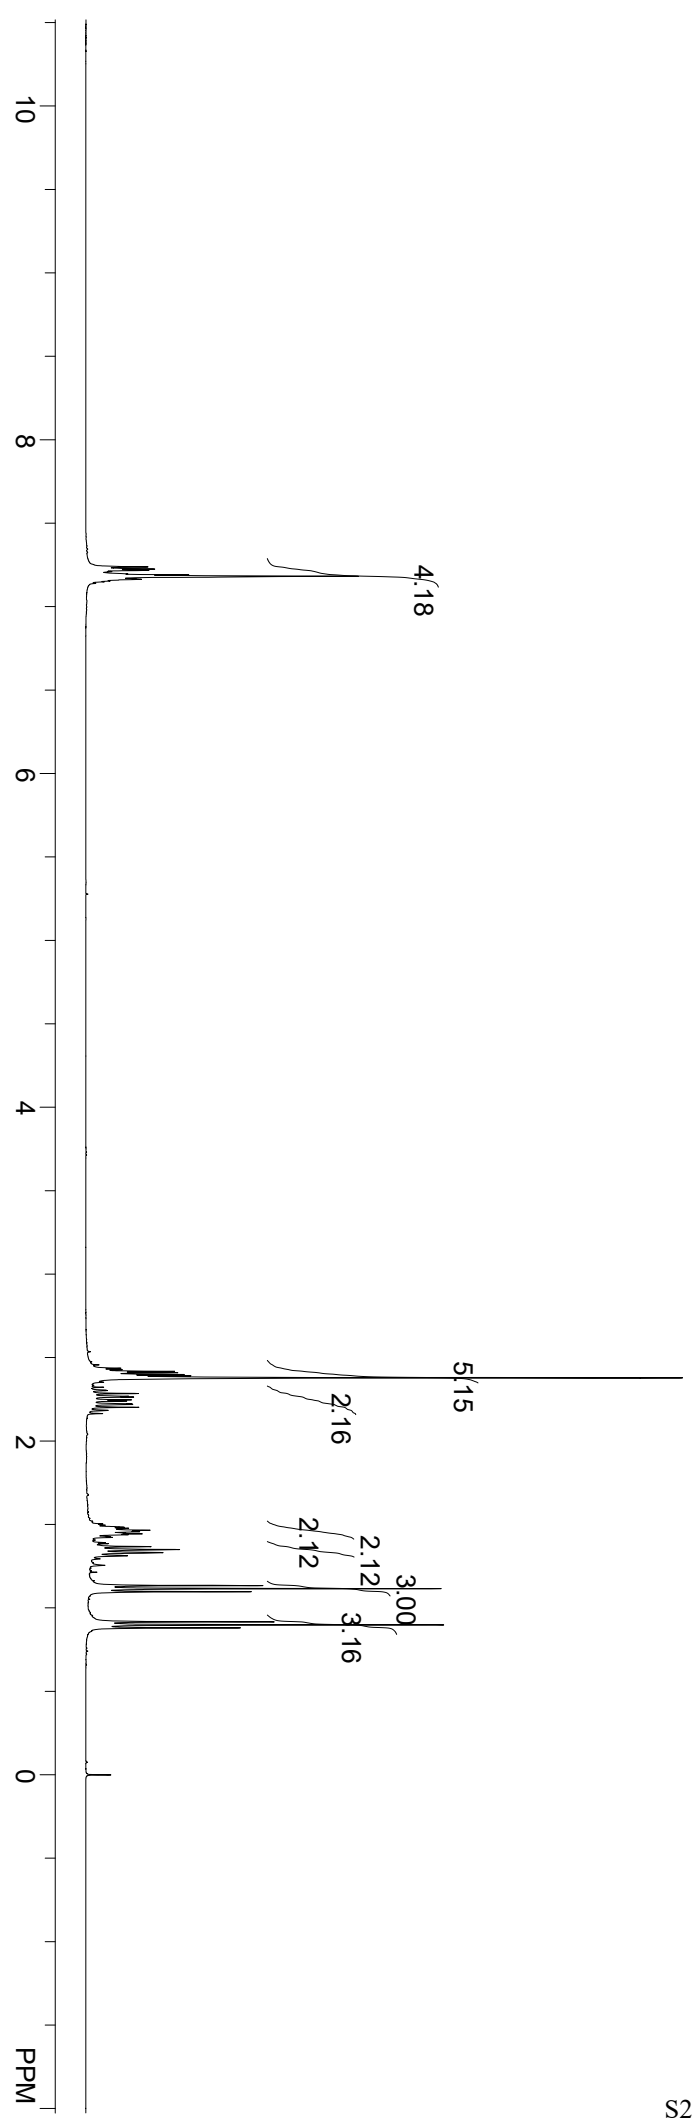

- 209.064
- 173.838
- 136.060
- 136.029
- 130.412
- 128.413
- 127.513
- 125.790
- 111.286
- 100.716
- 77.316
- 77.000
- 76.684
- 30.327
- 28.060
- 27.112
- 22.293
- 20.081
- 13.879
- 12.196

WJ-1-112-2-C  
 Nov 12 2019  
 SOLVENT: CDCl3  
 NA = 200  
 F1 = 100.612770 MHz  
 F2 = 1.000000 MHz

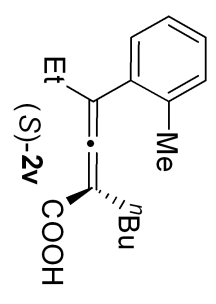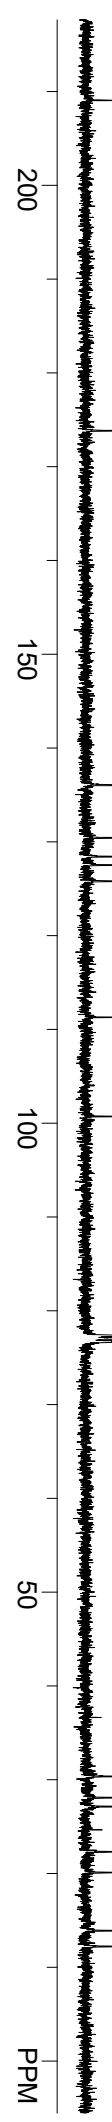

# Area Percent Report



Agilent Technologies

sample wj-1-112-2-AS-H-98-2-1.0-214

Data file: C:\Users\Public\Documents\ChemStation\1\Data\wgl 2019-11-12 21-55-01\006-P2-C1-wj-1-112-2.D

## Acquisition Data:

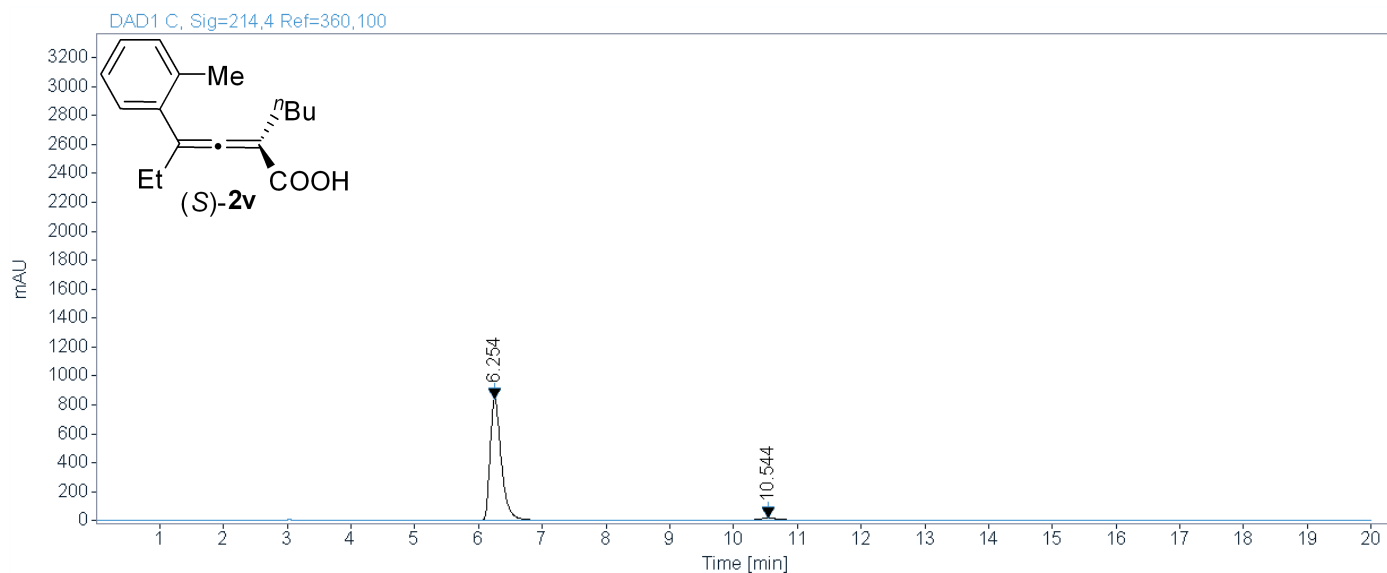

Signal: DAD1 C, Sig=214,4 Ref=360,100

| RT [min] | Width [min] | Height   | Area       | Area%    |
|----------|-------------|----------|------------|----------|
| 6.254    | 0.1877      | 842.0982 | 10373.5869 | 95.9732  |
| 10.544   | 0.4365      | 16.6175  | 435.2501   | 4.0268   |
|          |             | Sum      | 10808.8370 | 100.0000 |

# Area Percent Report



Agilent Technologies

sample wj-1-112-2-rac-AS-H-98-2-1.0-214

Data file: C:\Users\Public\Documents\ChemStation\1\Data\wgl 2019-11-12 21-55-01\007-P2-C2-wj-1-112-2-rac.D

## Acquisition Data:

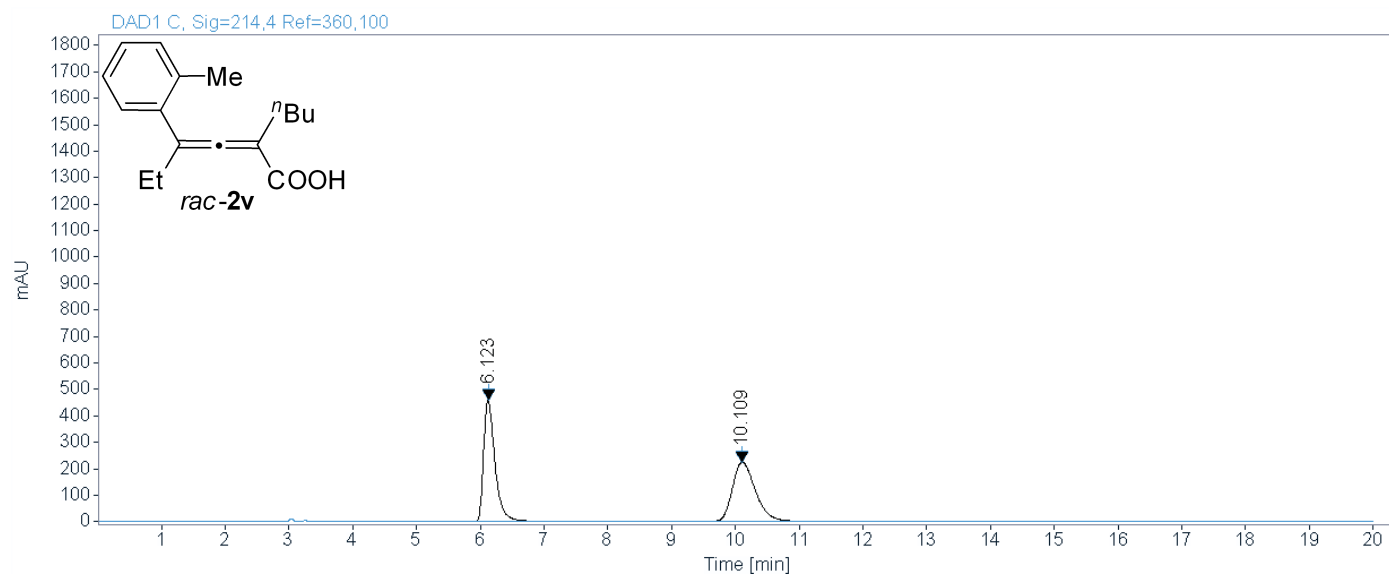

Signal: DAD1 C, Sig=214,4 Ref=360,100

| RT [min] | Width [min] | Height   | Area       | Area%    |
|----------|-------------|----------|------------|----------|
| 6.123    | 0.1883      | 460.1762 | 5693.4077  | 49.8083  |
| 10.109   | 0.3920      | 224.6288 | 5737.2310  | 50.1917  |
| Sum      |             |          | 11430.6387 | 100.0000 |



wj-1-091-2-H  
Oct 26 2019  
SOLVENT: CDCl3  
NA = 4  
F1 = 400.130005 MHz  
F2 = 1.000000 MHz

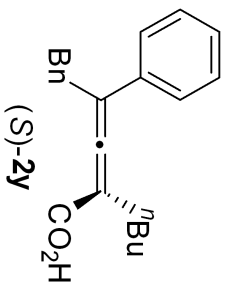

7.398  
7.378  
7.332  
7.314  
7.303  
7.285  
7.267  
7.248  
7.241  
7.222  
7.202  
7.183  
7.166

3.929  
3.889  
3.876  
3.837

2.249  
2.229  
2.212  
2.194  
2.179  
2.159

1.332  
1.316  
1.301  
1.278  
1.260  
1.244  
1.225

1.207  
0.854  
0.836  
0.819  
0.000  
-0.002

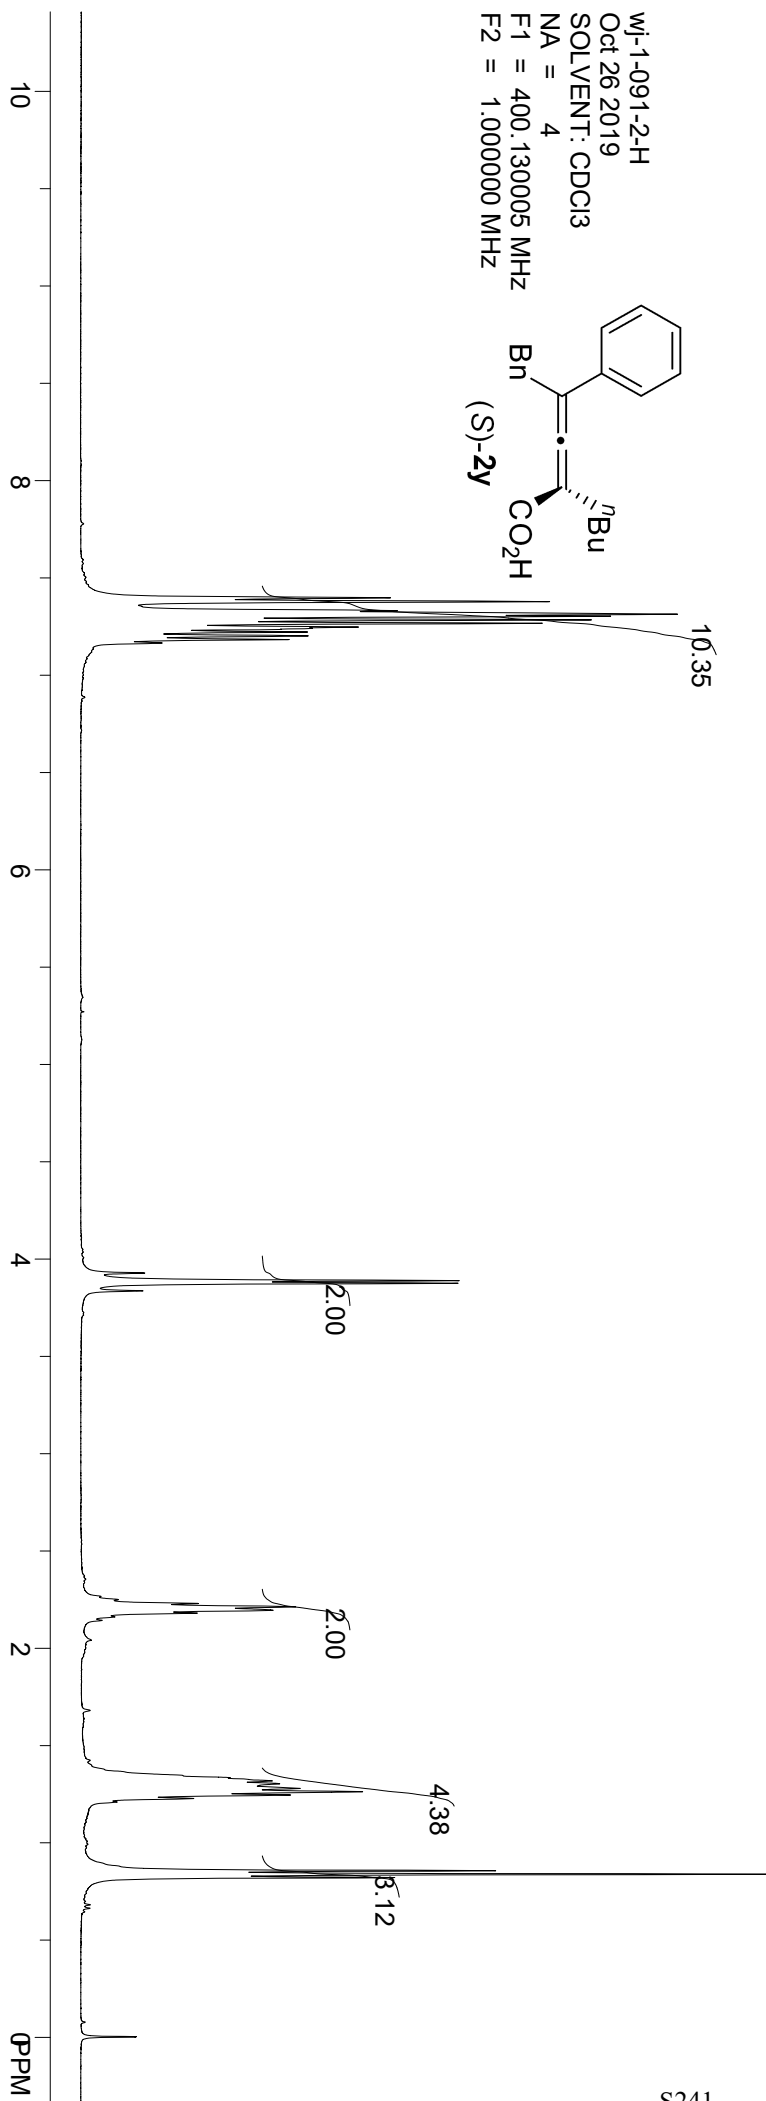

wj-1-091-2-C  
Oct 26 2019  
SOLVENT: CDCl3  
NA = 256  
F1 = 100.612770 MHz  
F2 = 1.000000 MHz

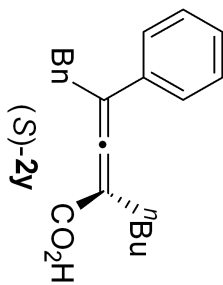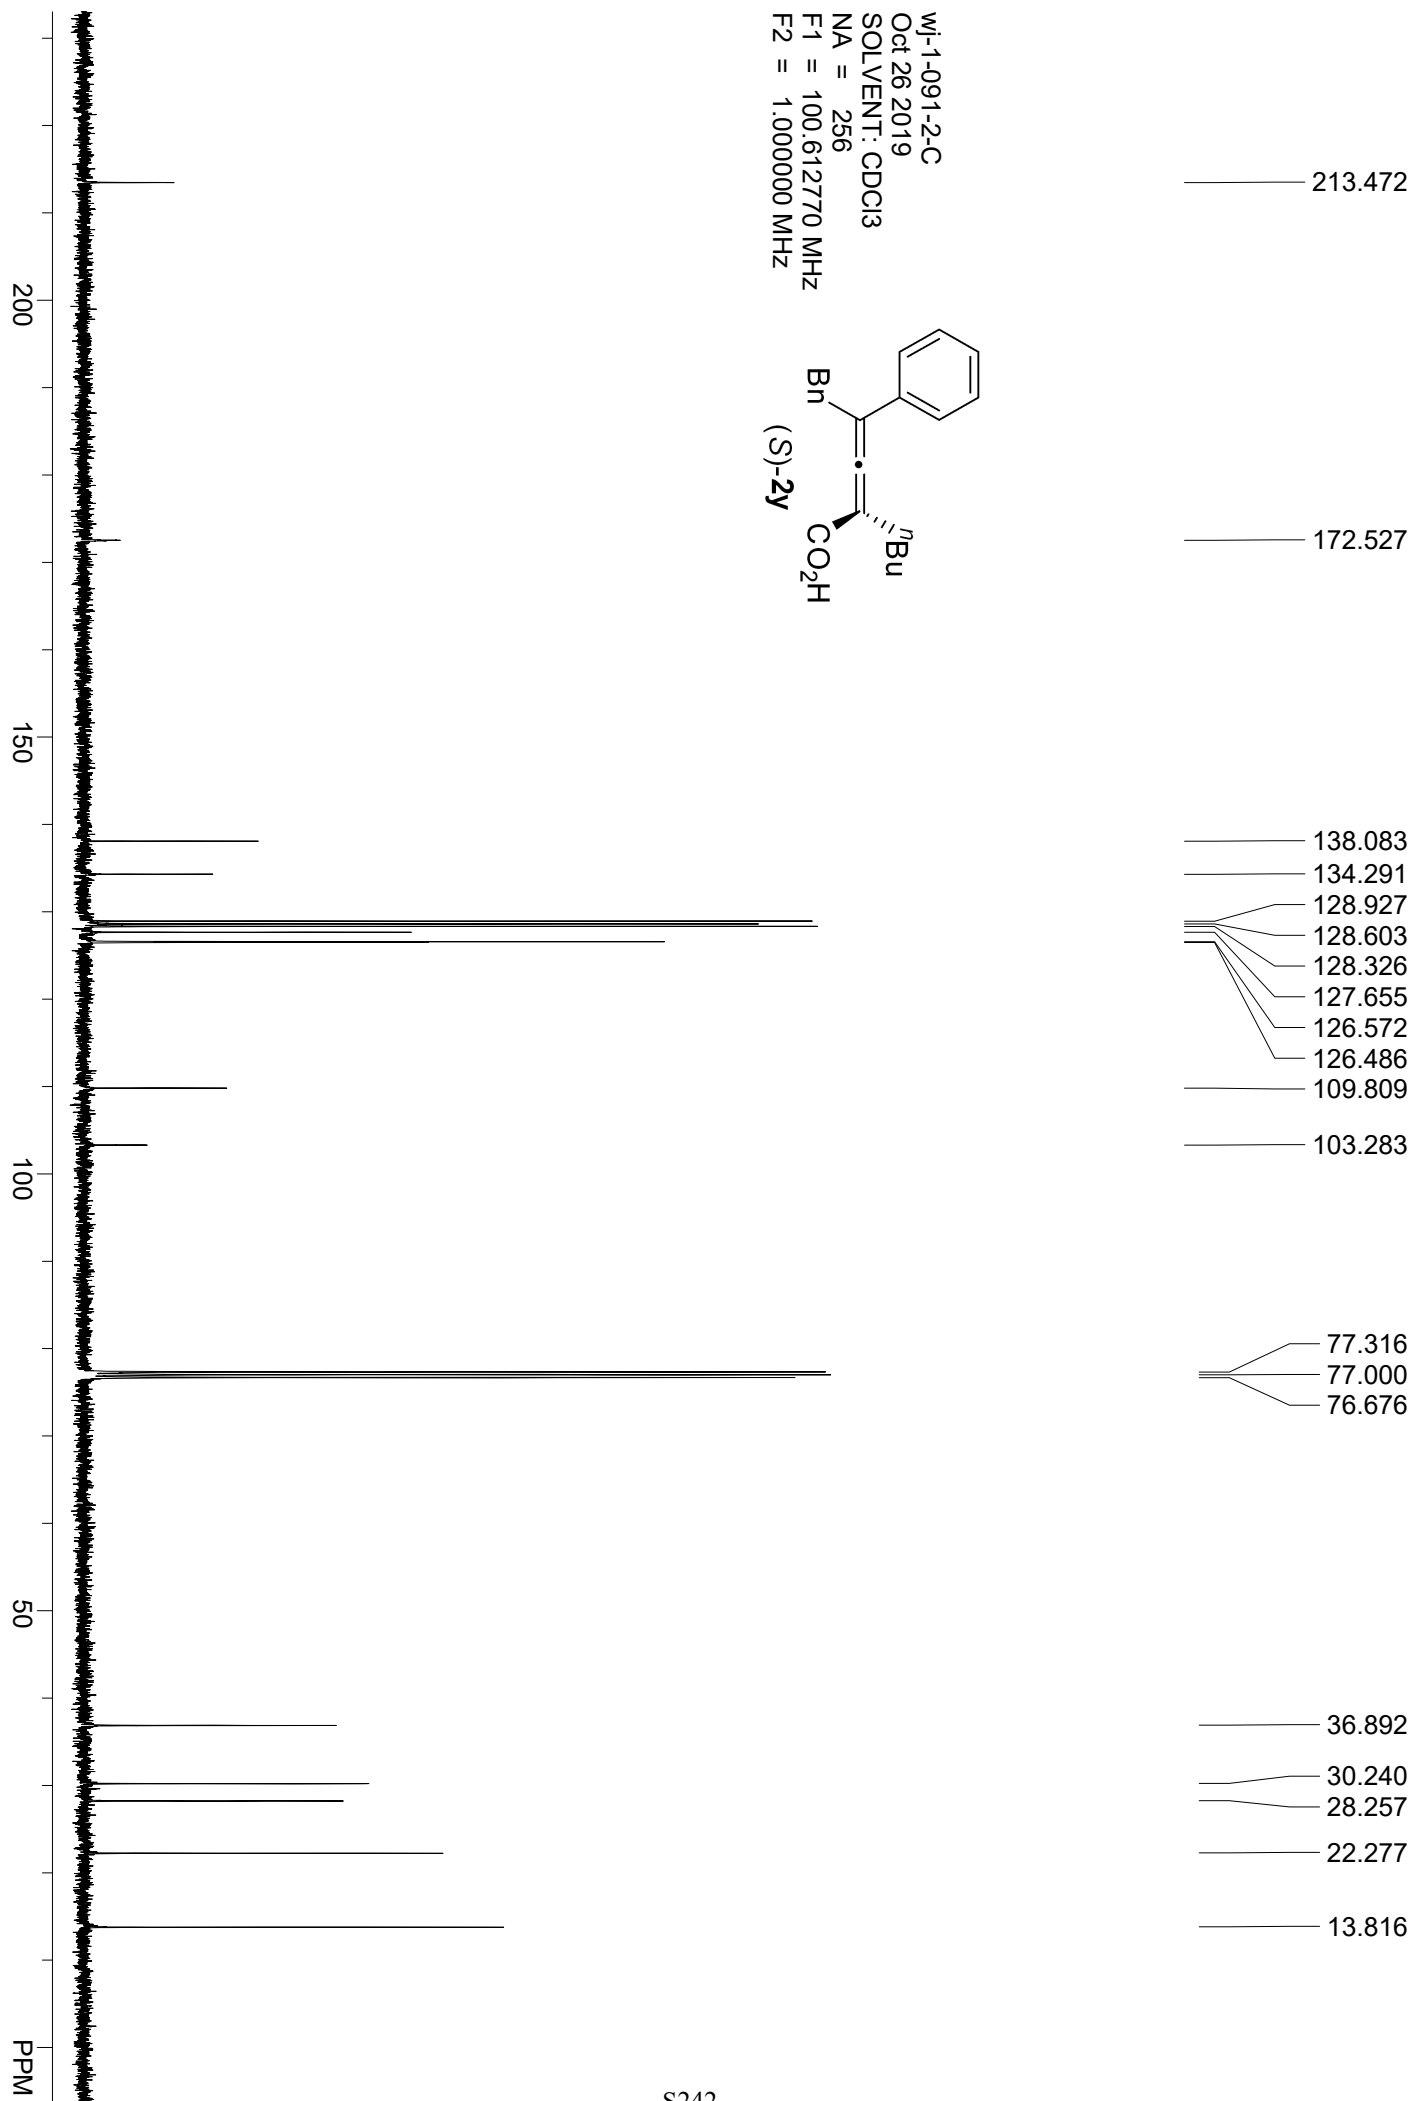

# Area Percent Report



Agilent Technologies

sample wj-1-091-2-AS-H-98-2-1.0-214

Data file: C:\Users\Public\Documents\ChemStation\1\Data\WJ\_LC 2019-10-25 22-04-20\005-P2-C3-wj-1-091-2.D

## Acquisition Data:

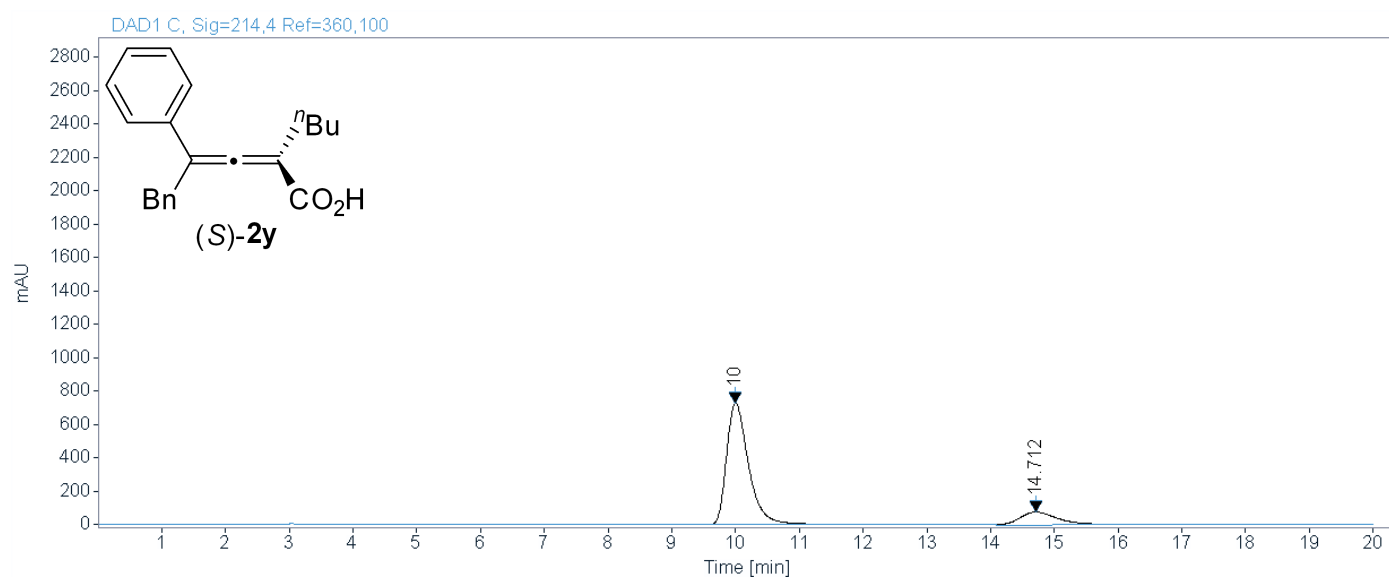

Signal: DAD1 C, Sig=214,4 Ref=360,100

| RT [min] | Width [min] | Height   | Area       | Area%    |
|----------|-------------|----------|------------|----------|
| 10.000   | 0.3687      | 729.9028 | 17560.6309 | 85.4857  |
| 14.712   | 0.6611      | 75.1666  | 2981.5488  | 14.5143  |
| Sum      |             |          | 20542.1797 | 100.0000 |

# Area Percent Report



sample wj-1-091-2-rac-AS-H-98-2-1.0-214

Data file: C:\Users\Public\Documents\ChemStation\1\Data\WJ\_LC 2019-10-25 22-04-20\006-P2-C4-wj-1-091-2-rac.D

## Acquisition Data:

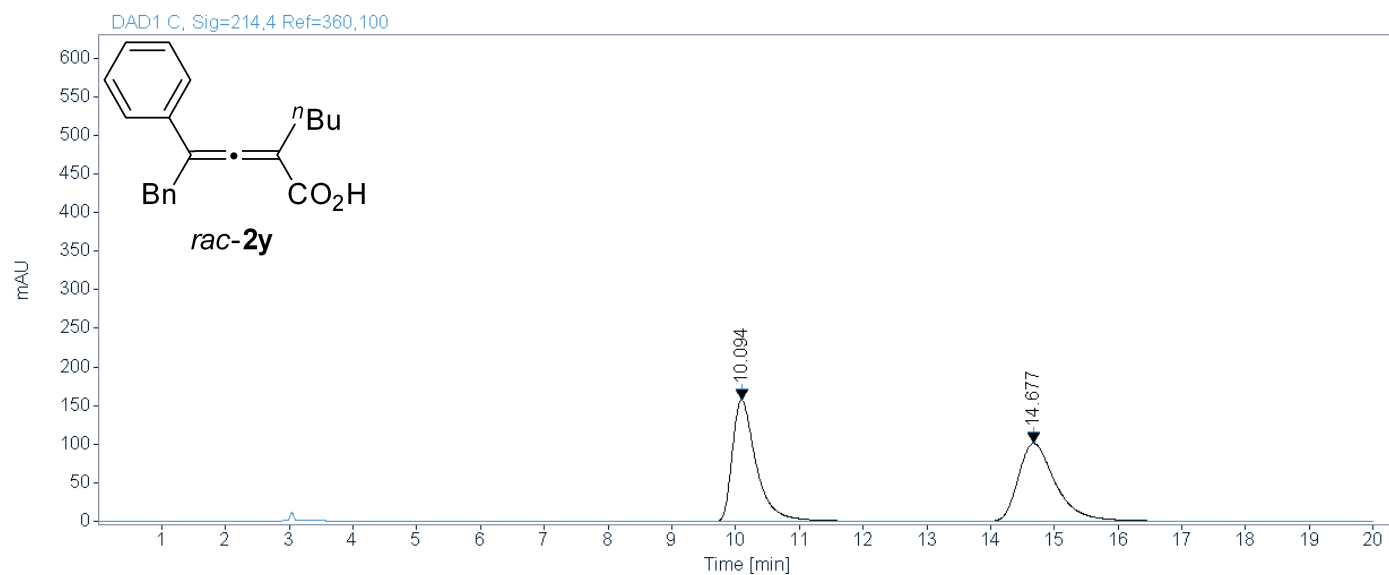

Signal: DAD1 C, Sig=214,4 Ref=360,100

| RT [min] | Width [min] | Height   | Area      | Area%    |
|----------|-------------|----------|-----------|----------|
| 10.094   | 0.3980      | 157.7003 | 4190.3838 | 50.0406  |
| 14.677   | 0.6270      | 101.0590 | 4183.5767 | 49.9594  |
|          |             | Sum      | 8373.9604 | 100.0000 |

- 7.666
- 7.663
- 7.645
- 7.368
- 7.364
- 7.350
- 7.331
- 7.294
- 7.291
- 7.288
- 7.278
- 7.273
- 7.267
- 7.257
- 7.255
- 7.250

- 2.351
- 2.294
- 2.277
- 2.259
- 1.739
- 1.631
- 1.575
- 1.573
- 1.558
- 1.550
- 1.538
- 1.532
- 1.520
- 1.502
- 1.479
- 1.462
- 1.443
- 1.430
- 1.423
- 1.406
- 0.943
- 0.925
- 0.907
- 0.073
- 0.000

wj-1-159-1-H  
 June 27 2020  
 SOLVENT: CDCl3  
 NA = 4  
 F1 = 400.130035 MHz  
 F2 = 1.000000 MHz

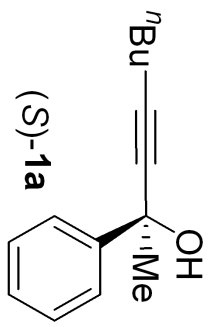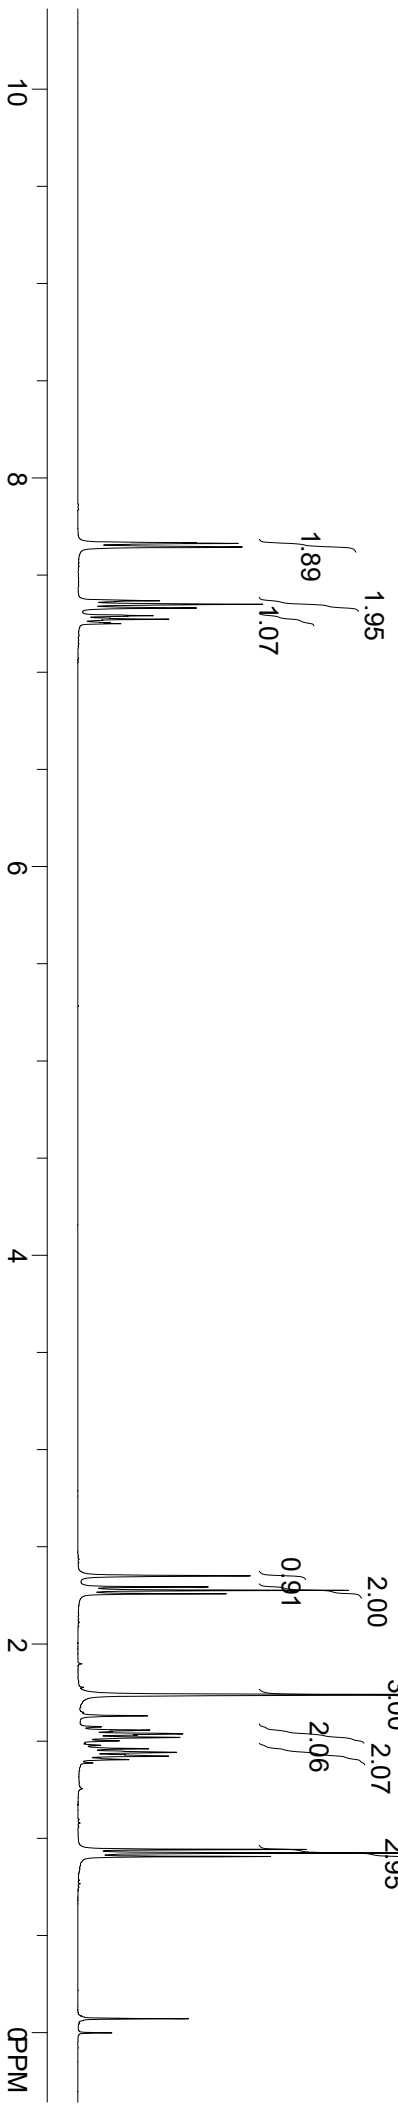

wj-1-159-1-C  
June 27 2020  
SOLVENT: CDCl3  
NA = 300  
F1 = 100.612877 MHz  
F2 = 1.000000 MHz

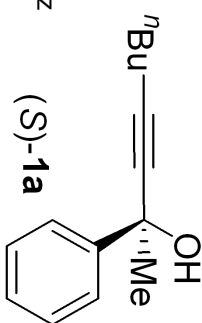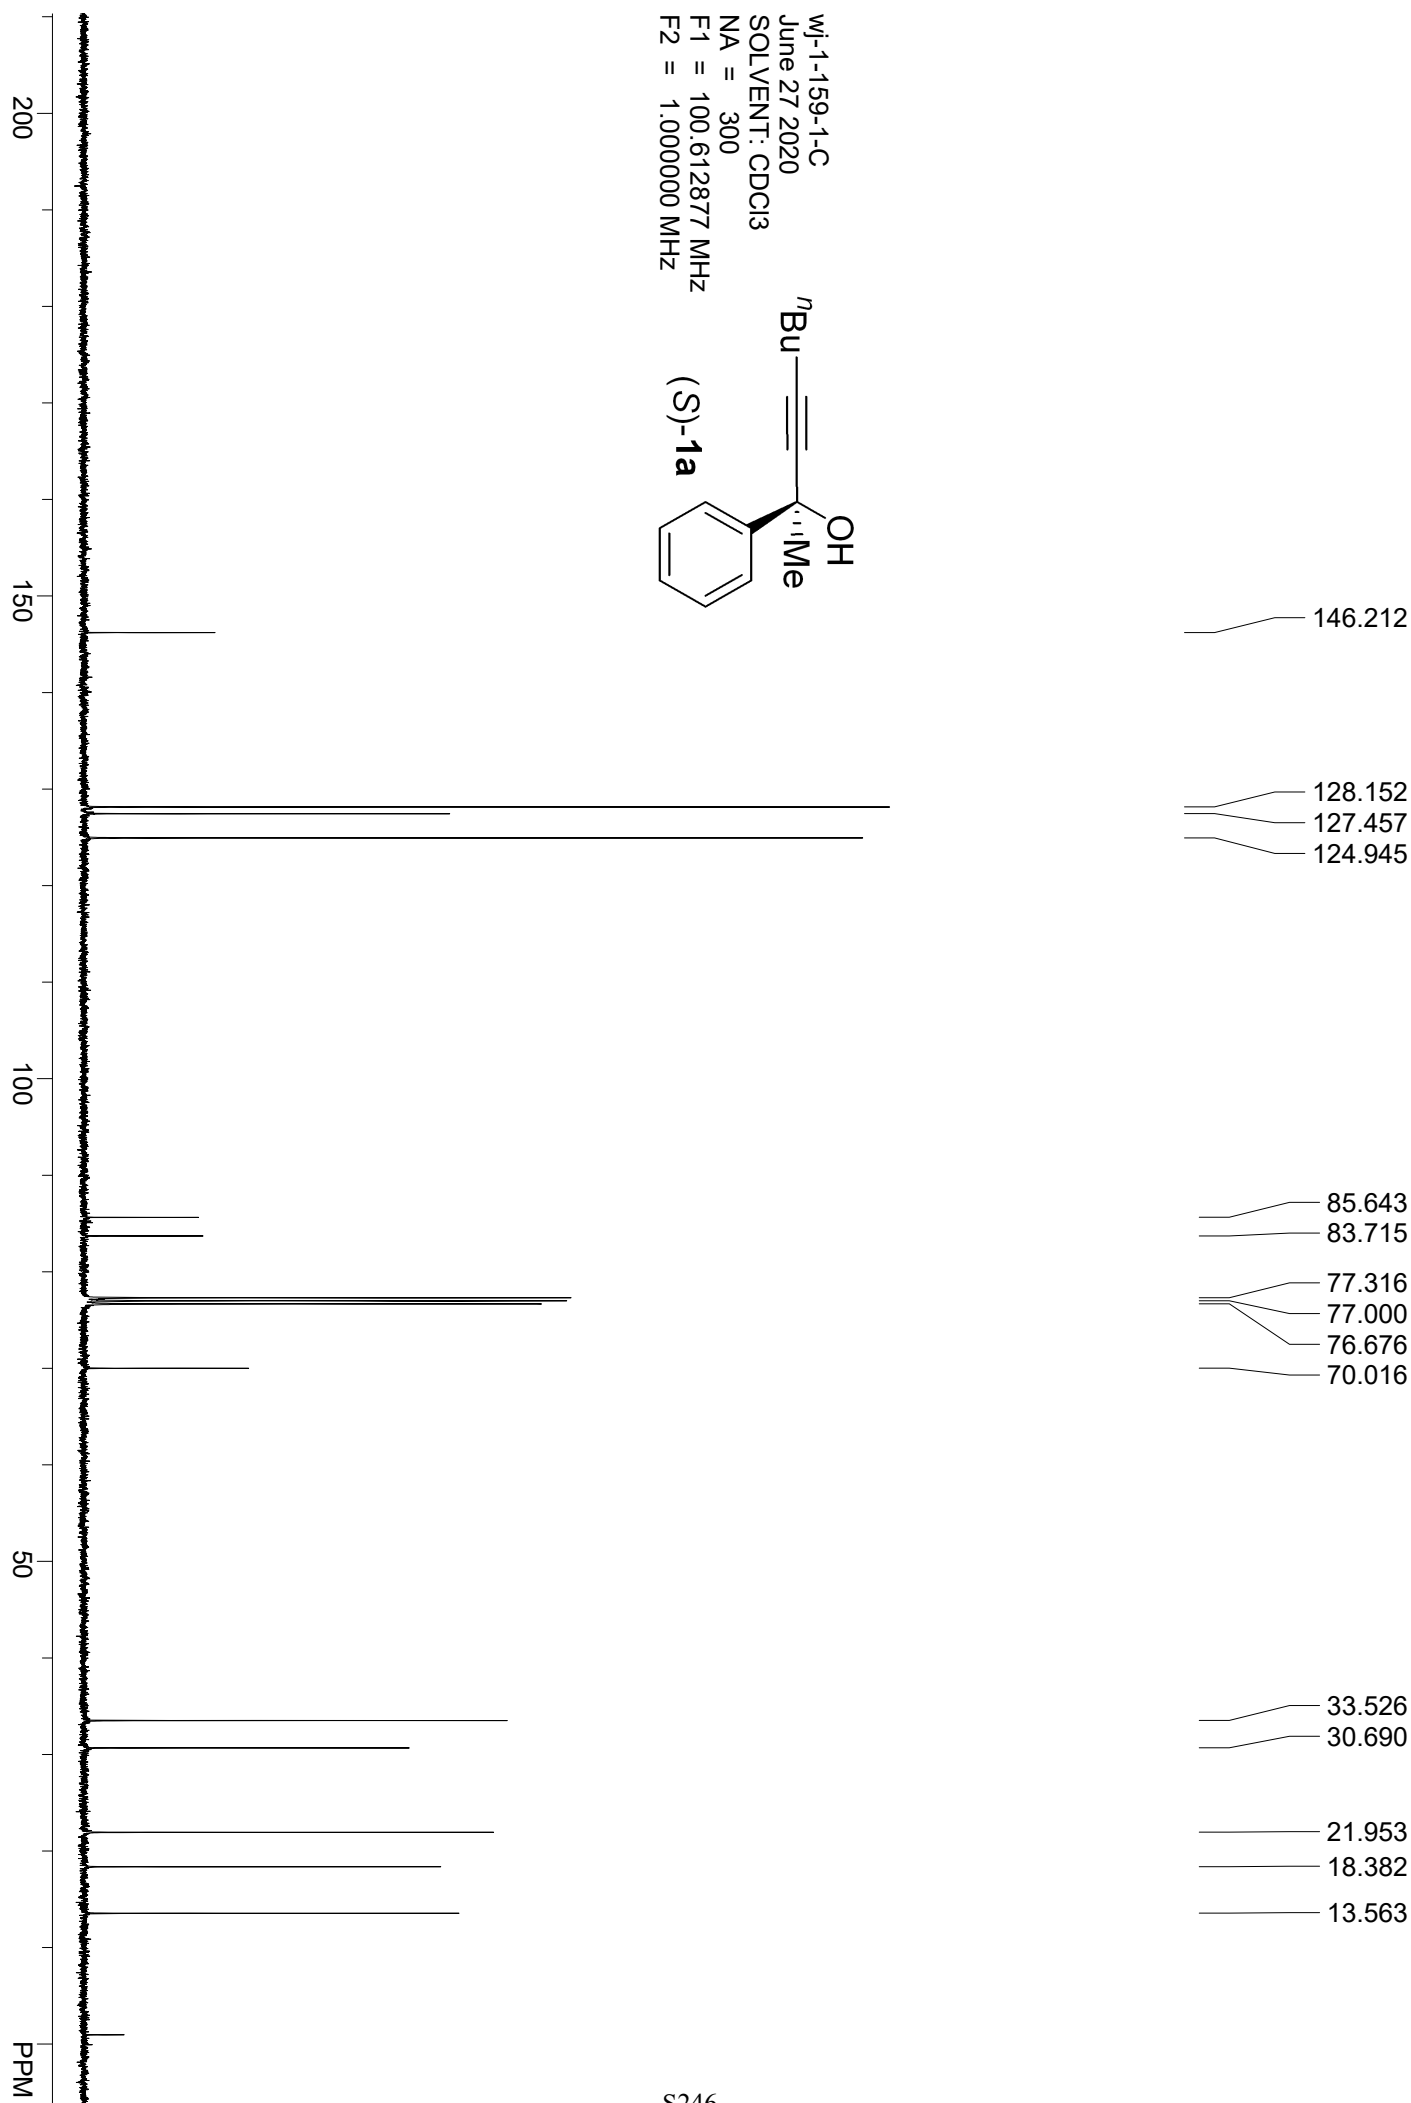

# Area Percent Report



Agilent Technologies

sample wj-1-159-1-AS-H-98-2-1.0-214

Data file: C:\Users\Public\Documents\ChemStation\1\Data\zwf-allenioc acid\_LC 2020-06-27 10-15-53\027-P2-C1-wj-1-159-1.D

## Acquisition Data:

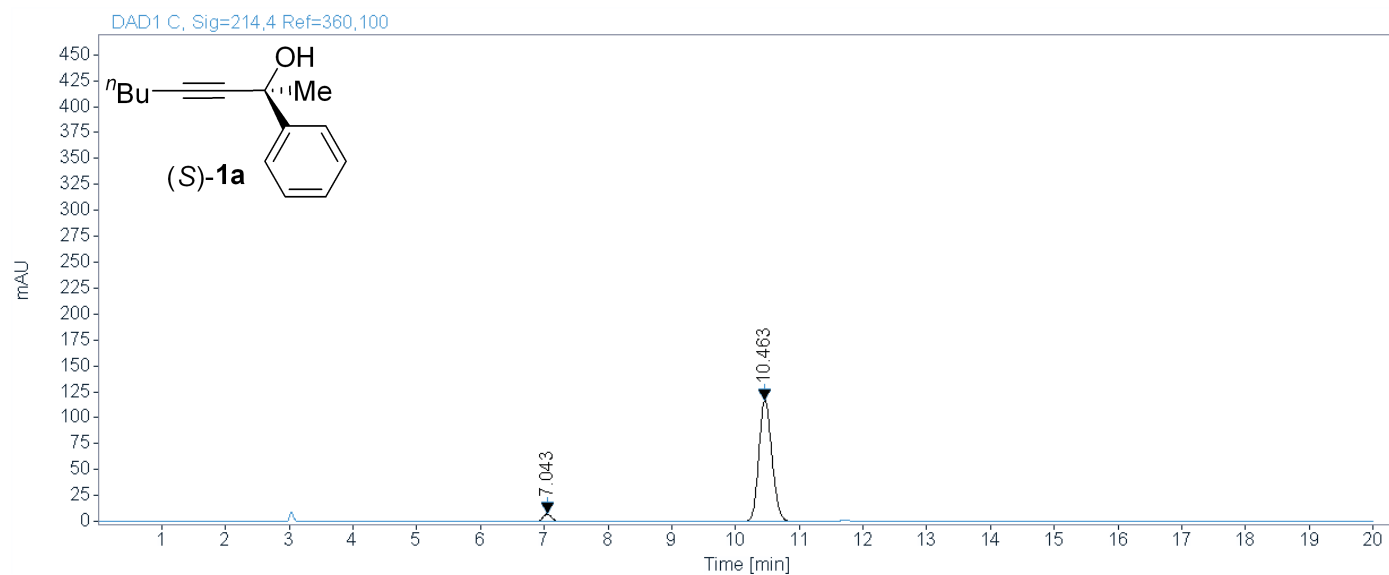

Signal: DAD1 C, Sig=214,4 Ref=360,100

| RT [min] | Width [min] | Height   | Area      | Area%    |
|----------|-------------|----------|-----------|----------|
| 7.043    | 0.1404      | 7.4554   | 67.9760   | 3.8981   |
| 10.463   | 0.2225      | 117.4467 | 1675.8452 | 96.1019  |
|          |             | Sum      | 1743.8212 | 100.0000 |

# Area Percent Report



sample wj-1-159-1-rac-AS-H-98-2-1.0-214

Data file: C:\Users\Public\Documents\ChemStation\1\Data\zwf-allenioc acid\_LC 2020-06-27 10-15-53\028-P2-C2-wj-1-159-1-rac.D

## Acquisition Data:

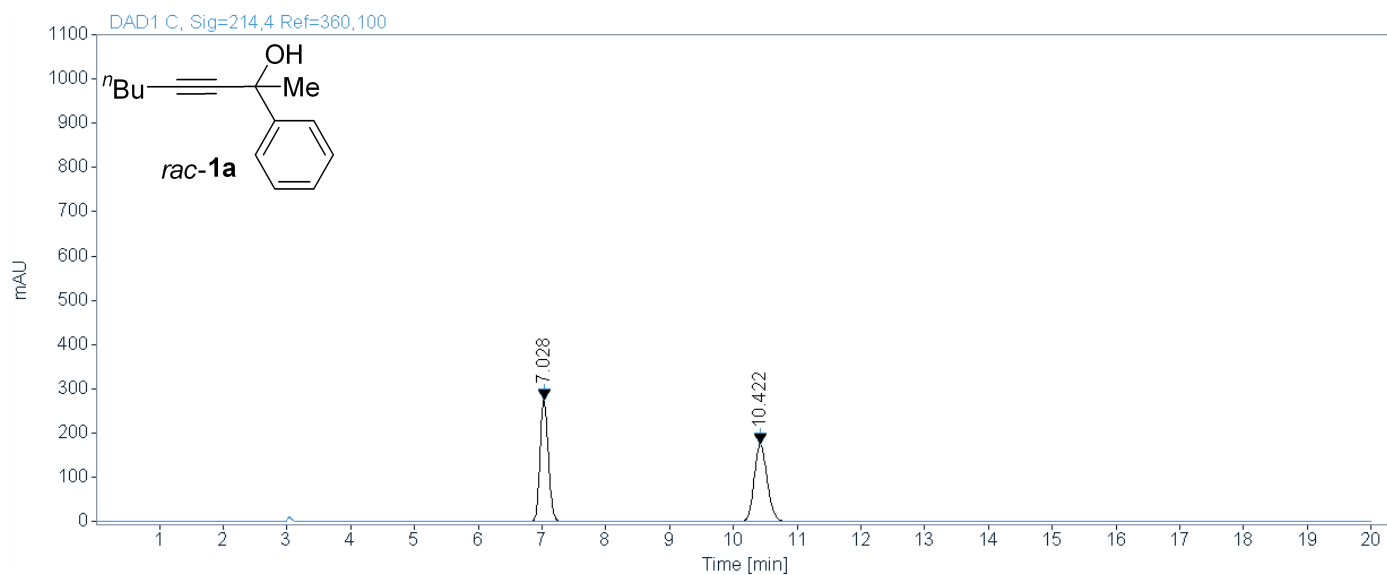

Signal: DAD1 C, Sig=214,4 Ref=360,100

| RT [min] | Width [min] | Height   | Area      | Area%    |
|----------|-------------|----------|-----------|----------|
| 7.028    | 0.1410      | 275.4709 | 2479.3728 | 49.8828  |
| 10.422   | 0.2223      | 174.7387 | 2491.0229 | 50.1172  |
|          |             | Sum      | 4970.3958 | 100.0000 |



wj-1-178-2-H  
Jul 10 2020  
SOLVENT: CDCl3  
NA = 4  
F1 = 400.130005 MHz  
F2 = 1.000000 MHz

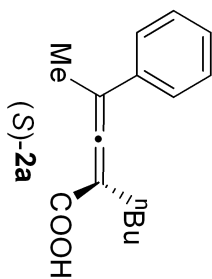

7.394  
7.376  
7.363  
7.345  
7.325  
7.273  
7.257  
7.239

2.348  
2.330  
2.310  
2.197

1.499  
1.482  
1.463  
1.445  
1.426  
1.393  
1.376  
1.358  
1.340  
1.322  
0.897  
0.879  
0.861  
-0.000

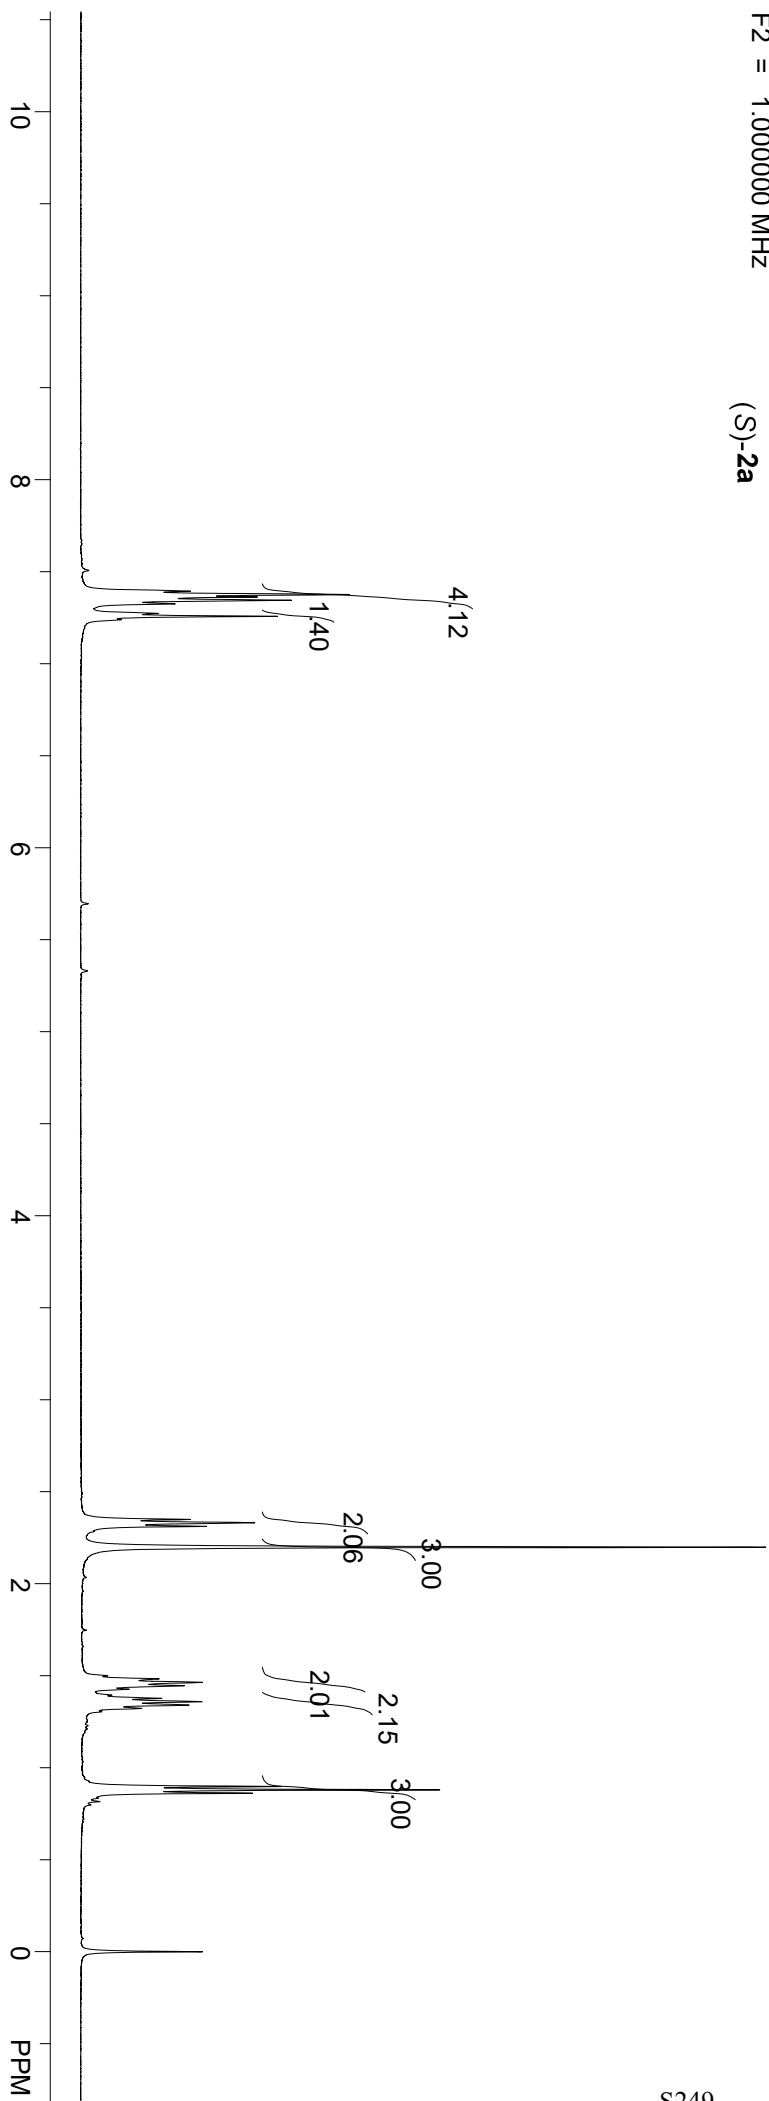

wj-1-178-2-C  
Jul 10 2020  
SOLVENT: CDCl3  
NA = 300  
F1 = 100.612770 MHz  
F2 = 1.000000 MHz

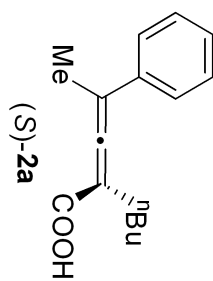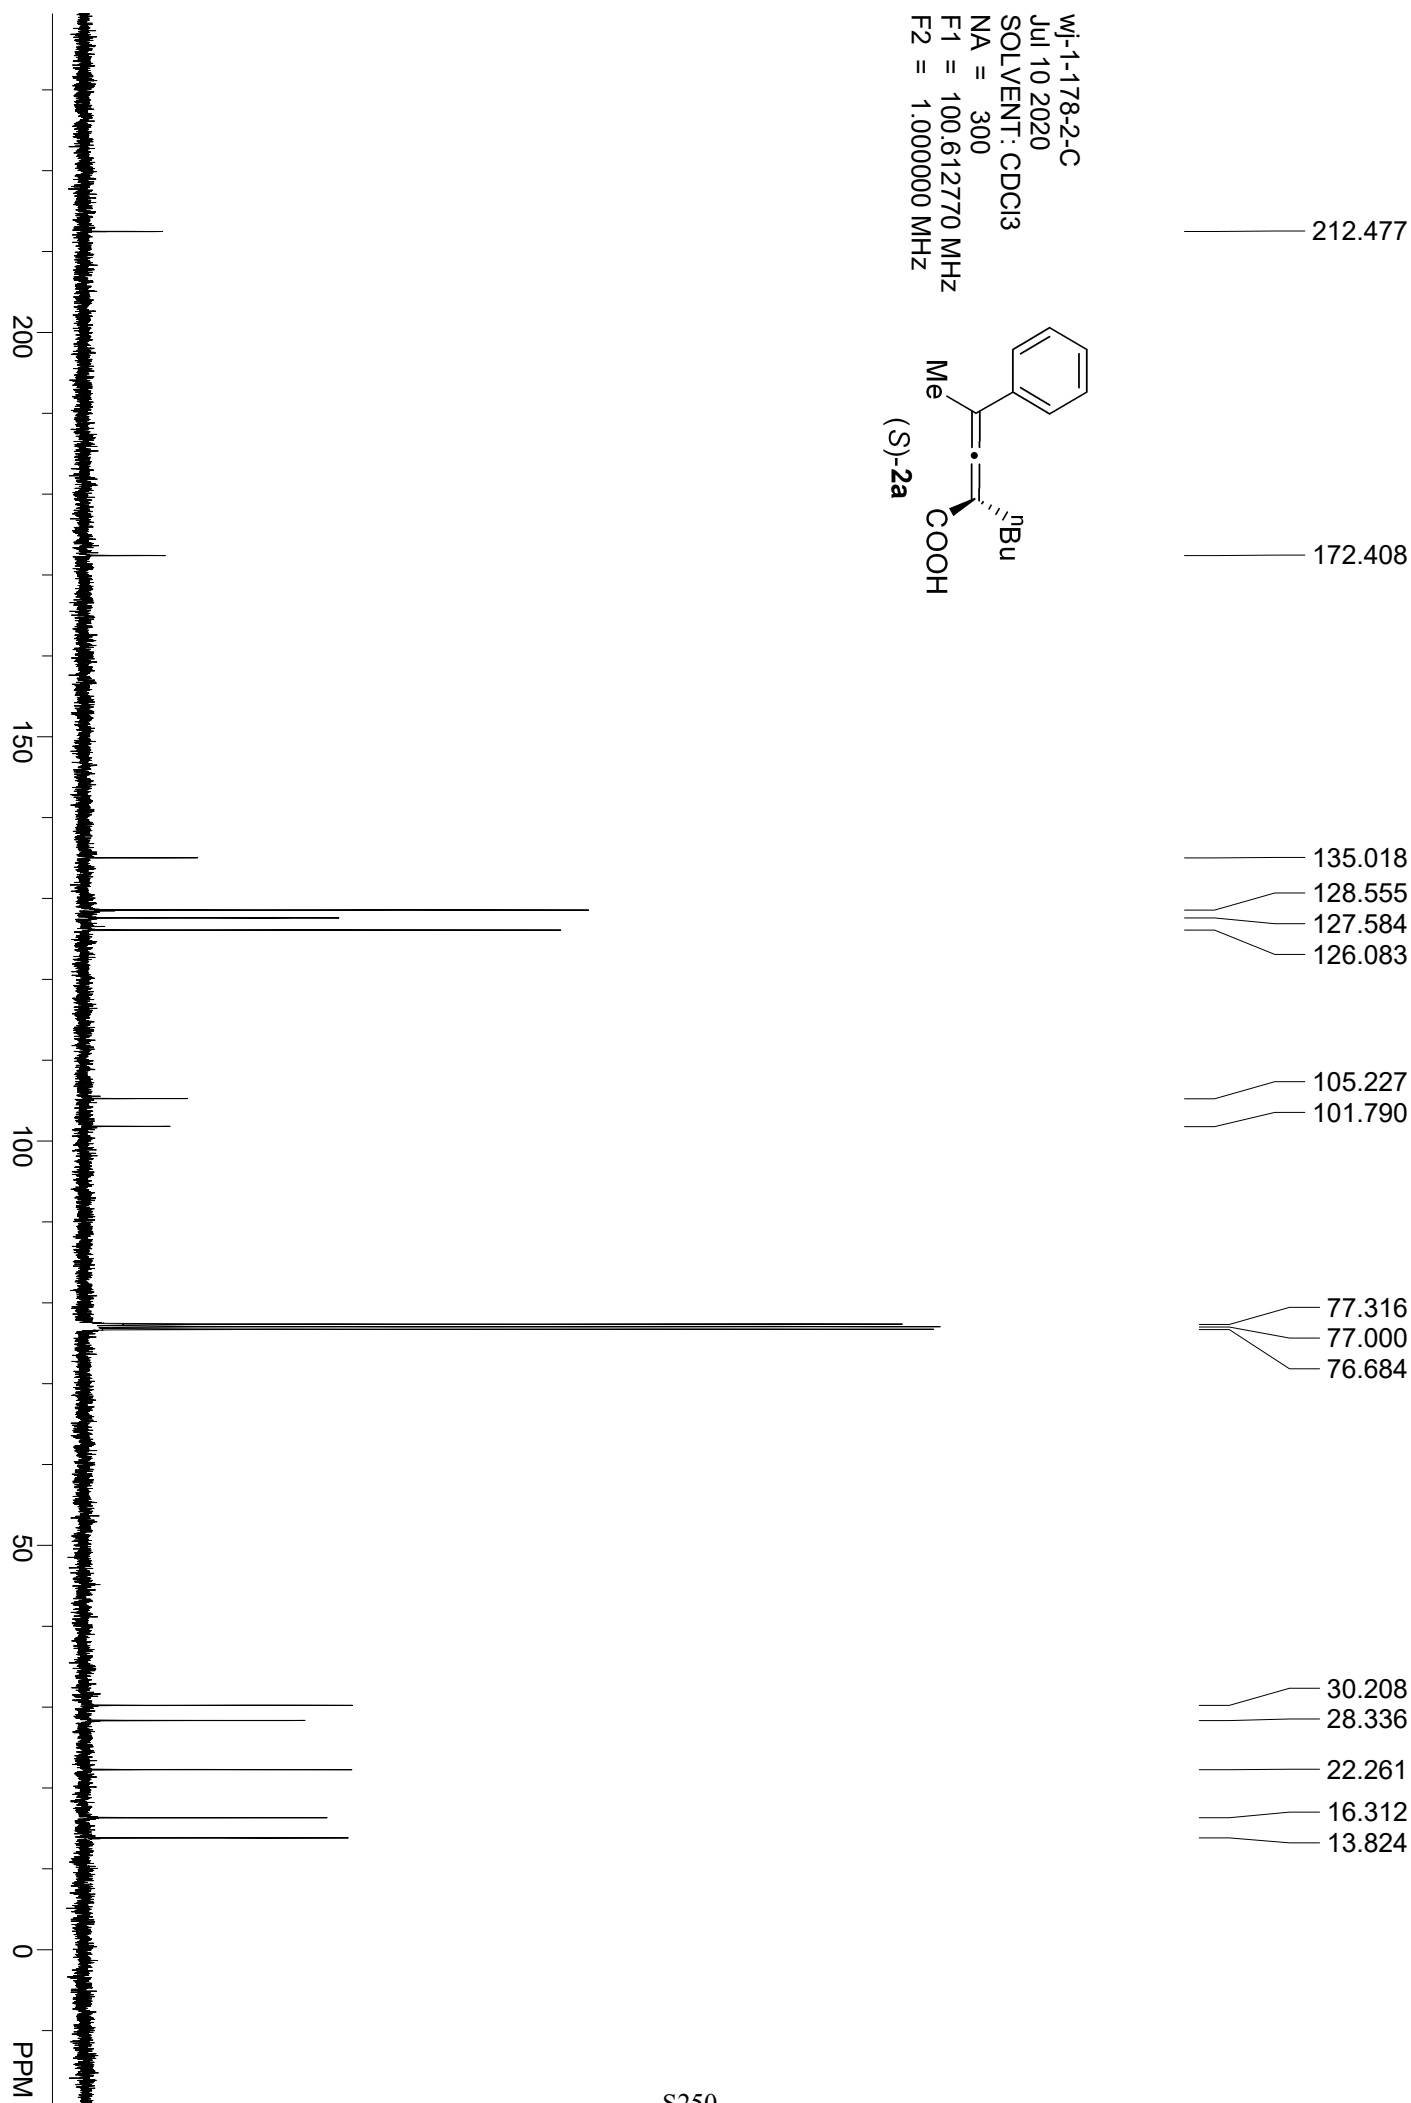

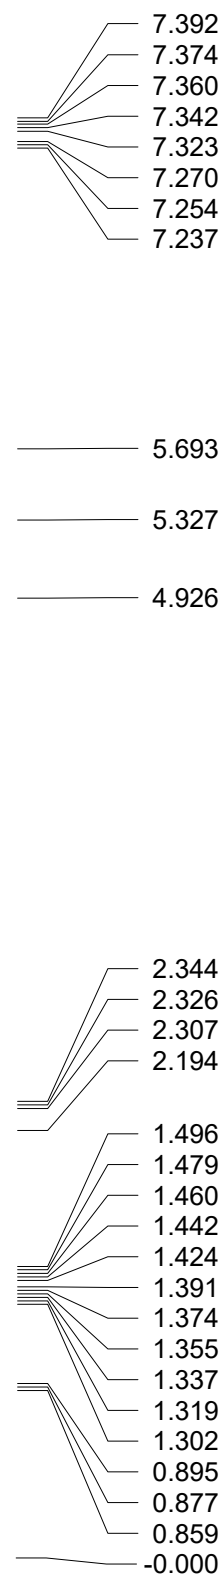

wf-1-178-2-purity  
 Jul 11 2020  
 SOLVENT: CDCl3  
 NA = 4  
 F1 = 400.130005 MHz  
 F2 = 1.000000 MHz

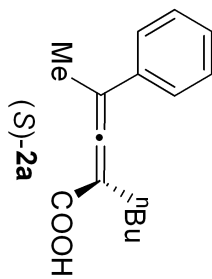

purity: CH<sub>2</sub>Br<sub>2</sub> (7.0 μL, 0.1 mmol) as  
 internal standard in 23.0 mg product

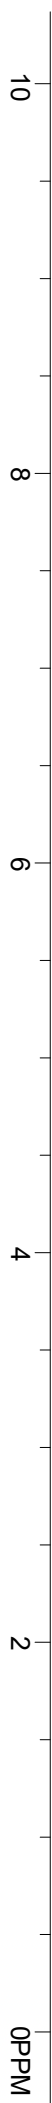

# Area Percent Report



Agilent Technologies

sample wj-1-178-2-AS-H-98-2-1.0-214

Data file: C:\Users\Public\Documents\ChemStation\1\Data\WJ\_LC 2020-07-09 11-27-12\031-P2-C3-wj-1-178-2.D

## Acquisition Data:

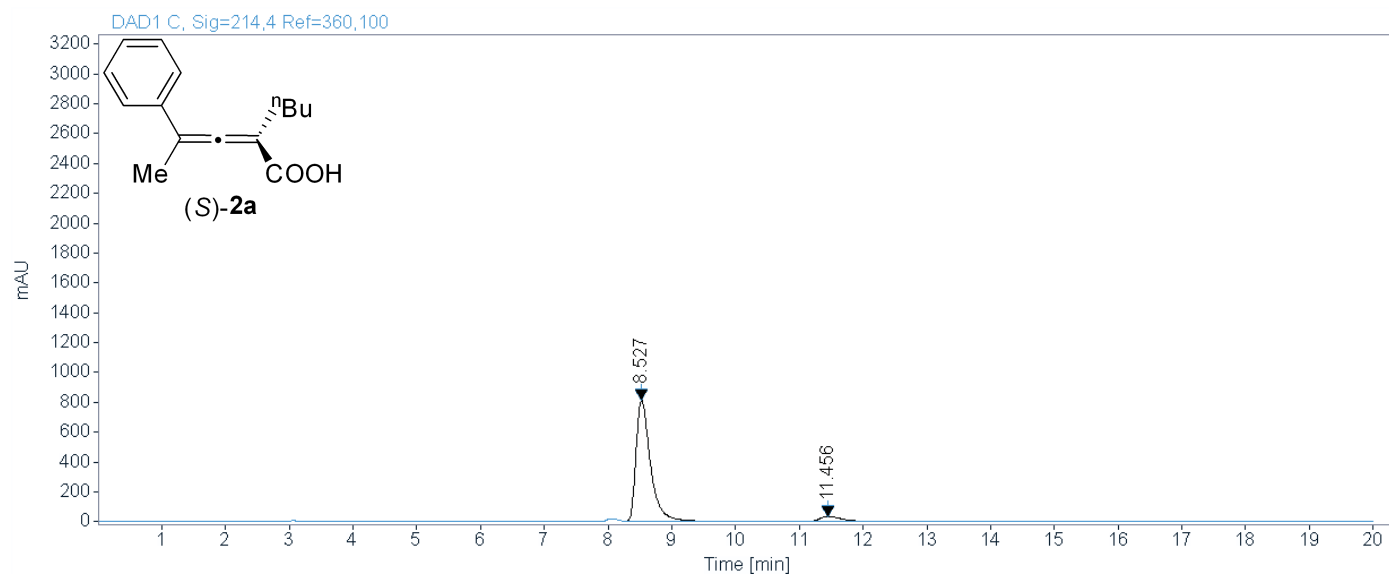

Signal: DAD1 C, Sig=214,4 Ref=360,100

| RT [min] | Width [min] | Height   | Area       | Area%    |
|----------|-------------|----------|------------|----------|
| 8.527    | 0.2622      | 815.7829 | 12831.7021 | 94.9816  |
| 11.456   | 0.3532      | 31.9884  | 677.9717   | 5.0184   |
| Sum      |             |          | 13509.6739 | 100.0000 |

# Area Percent Report



Agilent Technologies

sample wj-1-178-2-rac-AS-H-98-2-1.0-214

Data file: C:\Users\Public\Documents\ChemStation\1\Data\WJ\_LC 2020-07-09 11-27-12\032-P2-C4-wj-1-178-2-rac.D

## Acquisition Data:

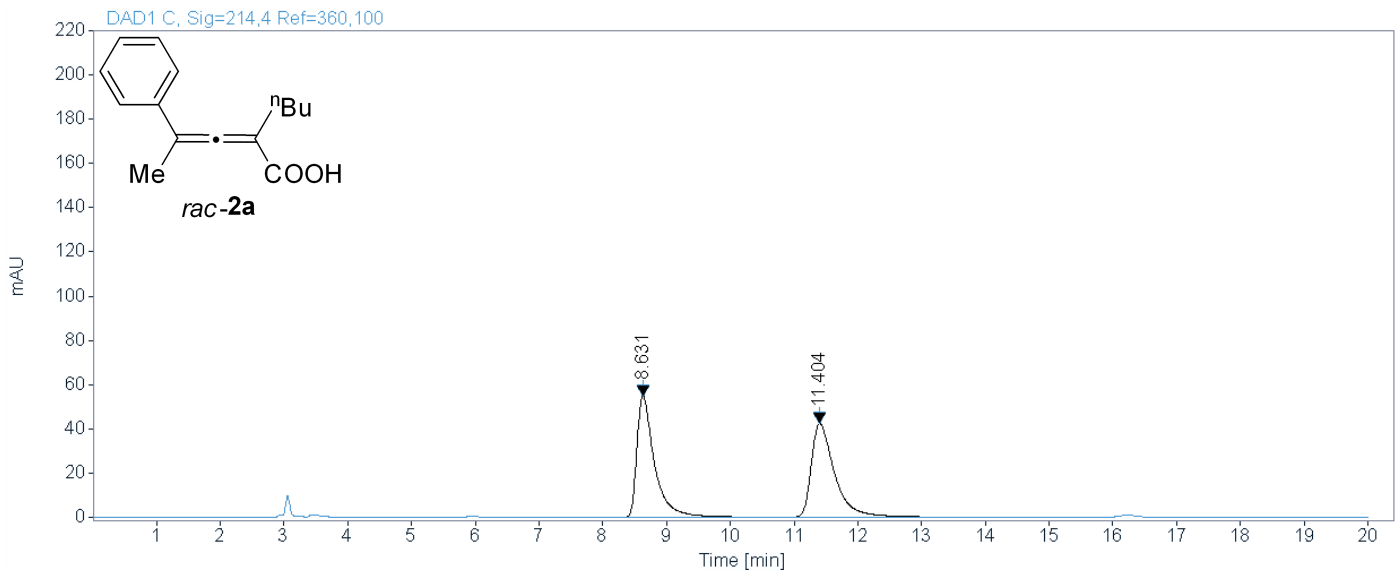

Signal: DAD1 C, Sig=214,4 Ref=360,100

| RT [min] | Width [min] | Height  | Area      | Area%    |
|----------|-------------|---------|-----------|----------|
| 8.631    | 0.2858      | 54.9920 | 1064.5034 | 49.6288  |
| 11.404   | 0.3785      | 42.5138 | 1080.4259 | 50.3712  |
| Sum      |             |         | 2144.9293 | 100.0000 |

wj-2-115-2-H  
Oct 28 2020  
SOLVENT: CDCl3  
NA = 4  
F1 = 400.130005 MHz  
F2 = 1.000000 MHz

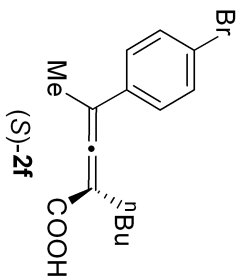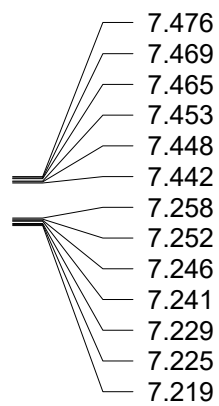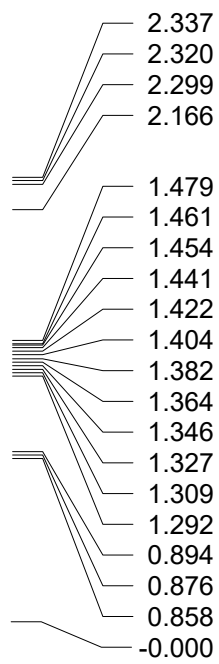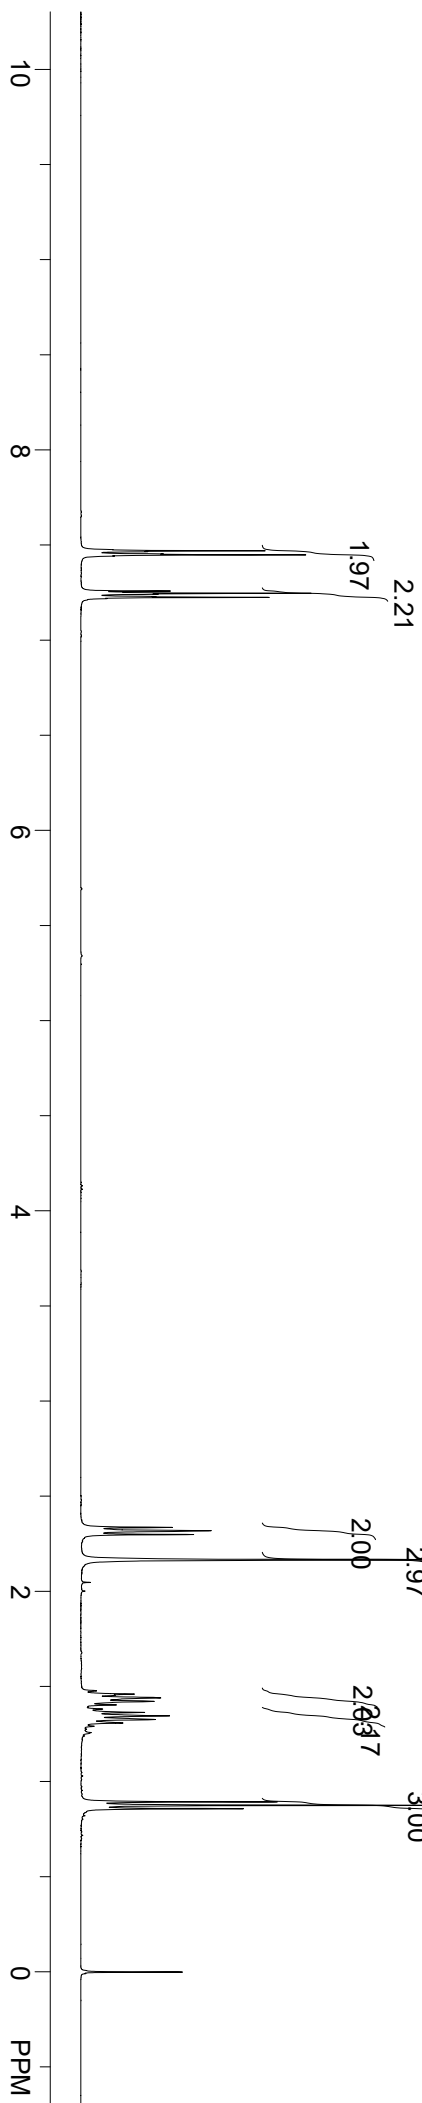

wj-2-115-2-C  
Oct 28 2020  
SOLVENT: CDCl3  
NA = 300  
F1 = 100.612770 MHz  
F2 = 1.000000 MHz

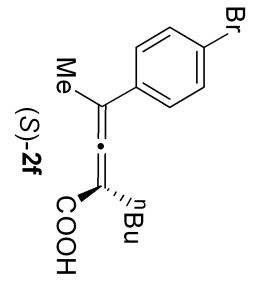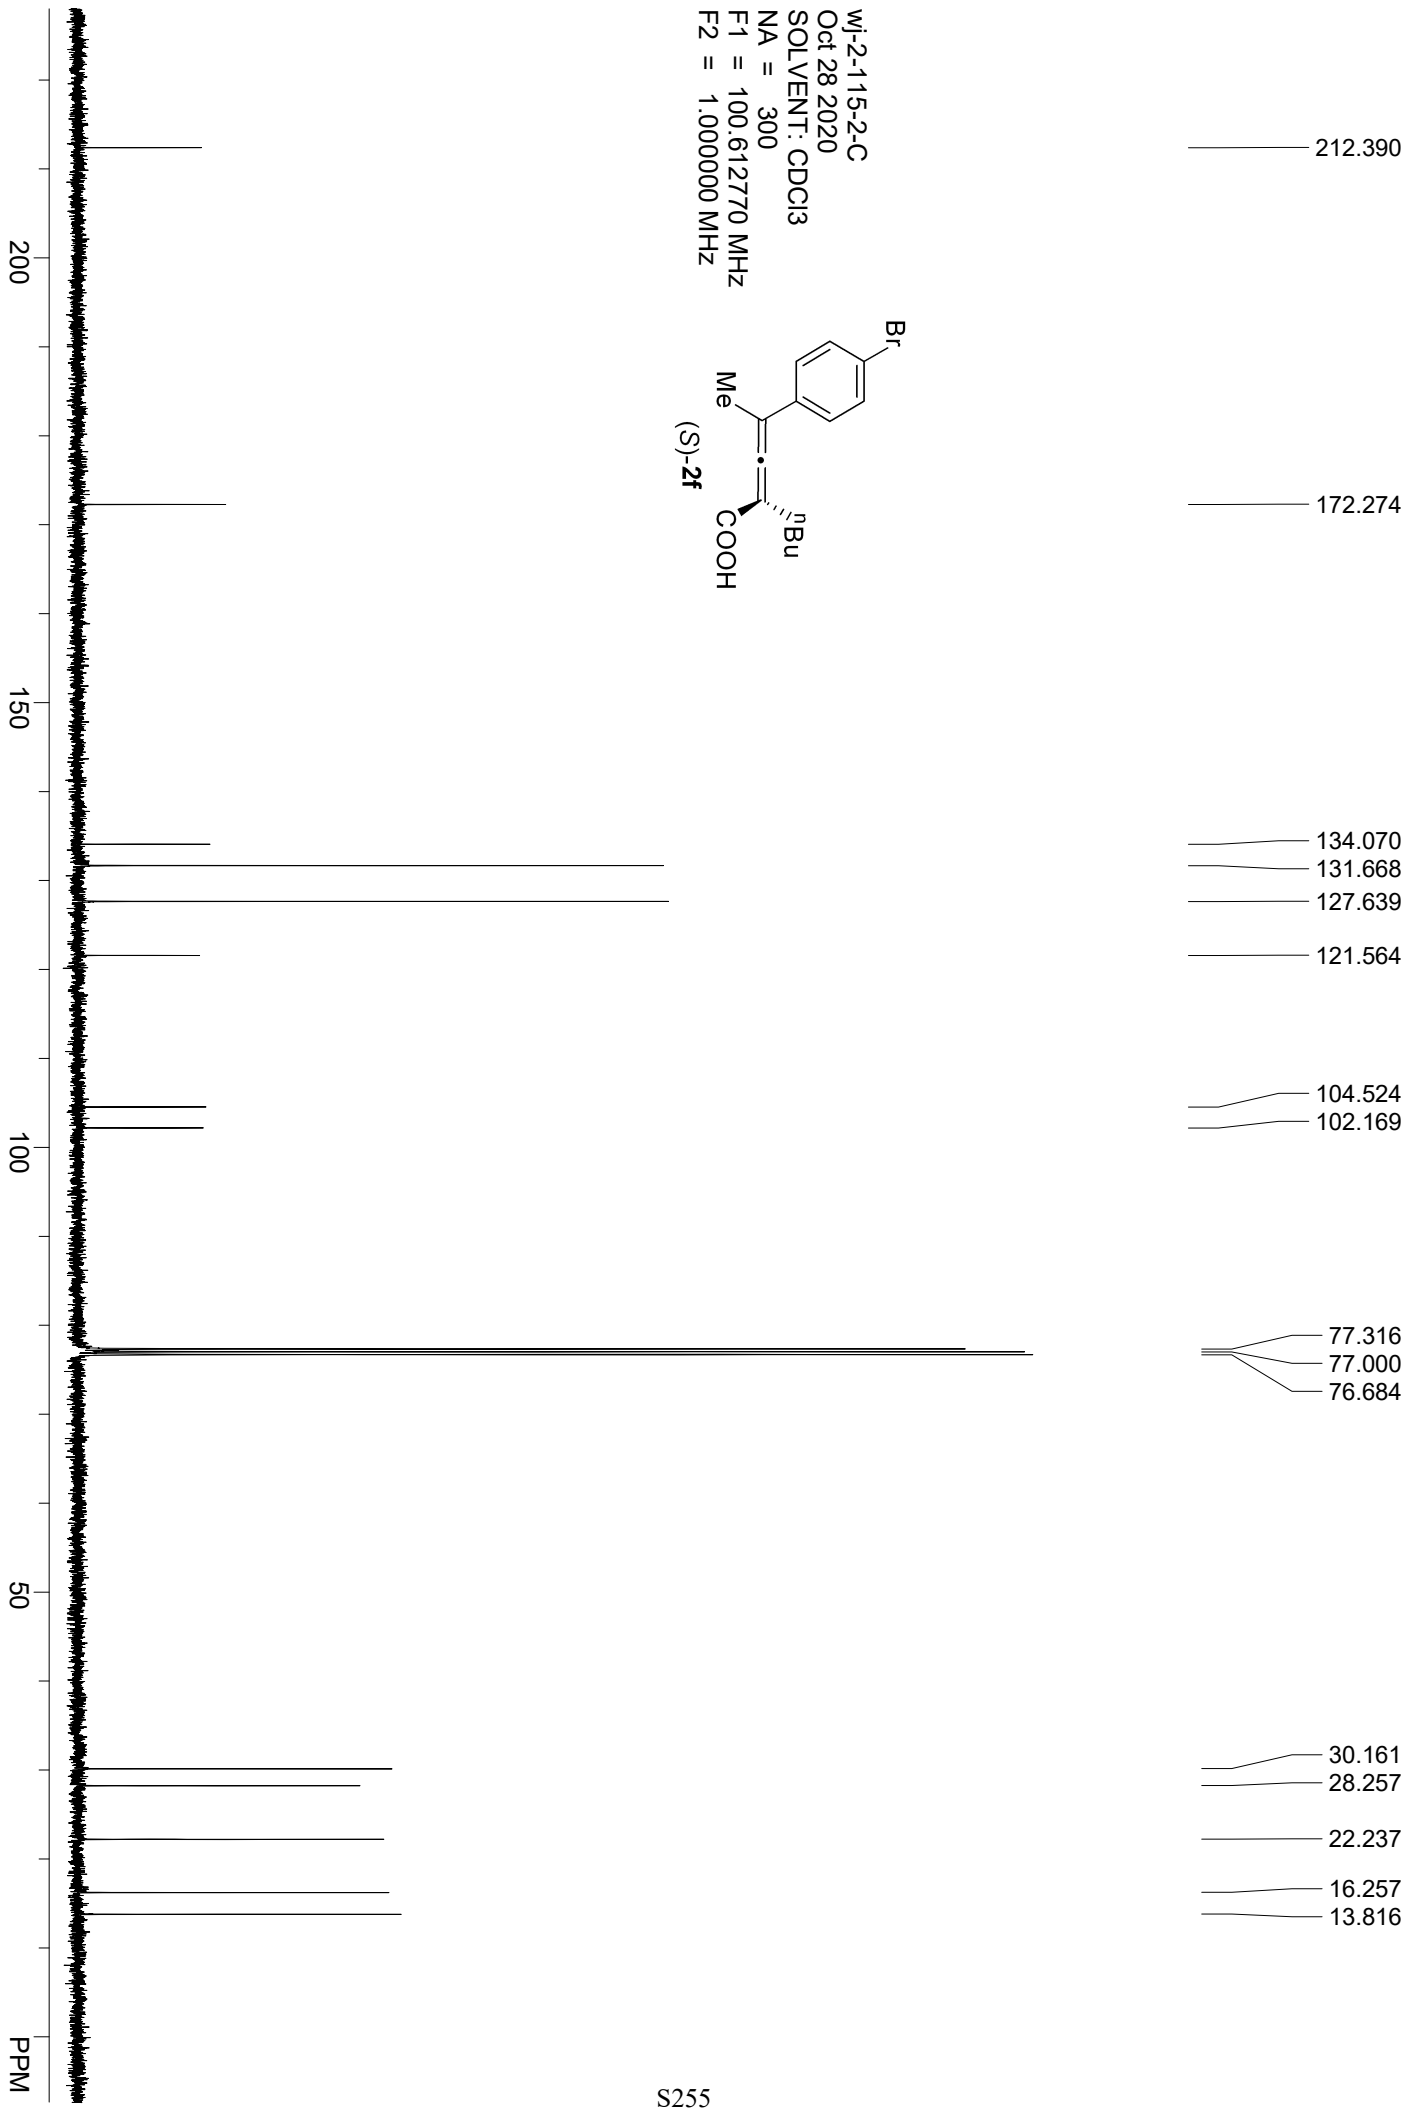

# Area Percent Report



sample wj-2-115-2-AS-H-98-2-1.0-214

Data file: C:\Users\Public\Documents\ChemStation\1\Data\WHN 2020-10-27 22-39-12\036-P2-C3-wj-2-115-2.D

## Acquisition Data:

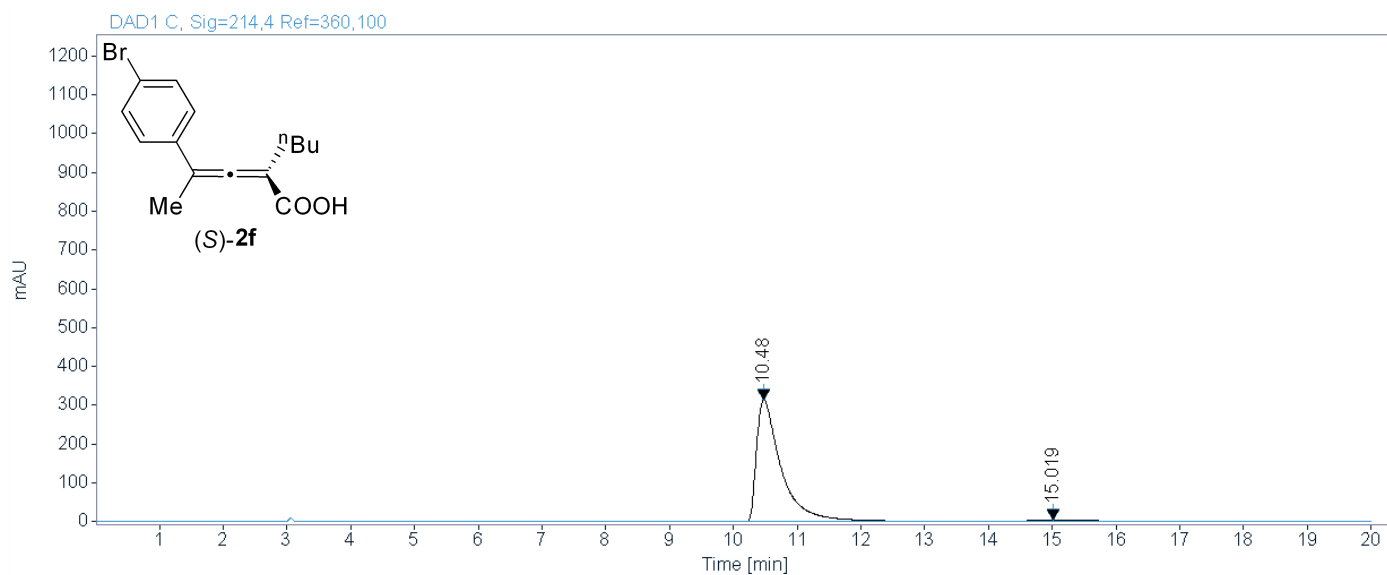

Signal: DAD1 C, Sig=214,4 Ref=360,100

| RT [min] | Width [min] | Height   | Area      | Area%    |
|----------|-------------|----------|-----------|----------|
| 10.480   | 0.4499      | 314.0293 | 8475.9814 | 97.2368  |
| 15.019   | 1.0441      | 3.8450   | 240.8650  | 2.7632   |
|          |             | Sum      | 8716.8465 | 100.0000 |



# Area Percent Report



Agilent Technologies

sample wj-2-115-2-rac-AS-H-98-2-1.0-214

Data file: C:\Users\Public\Documents\ChemStation\1\Data\WHN 2020-10-27 22-39-12\037-P2-C4-wj-2-115-2-rac.D

## Acquisition Data:

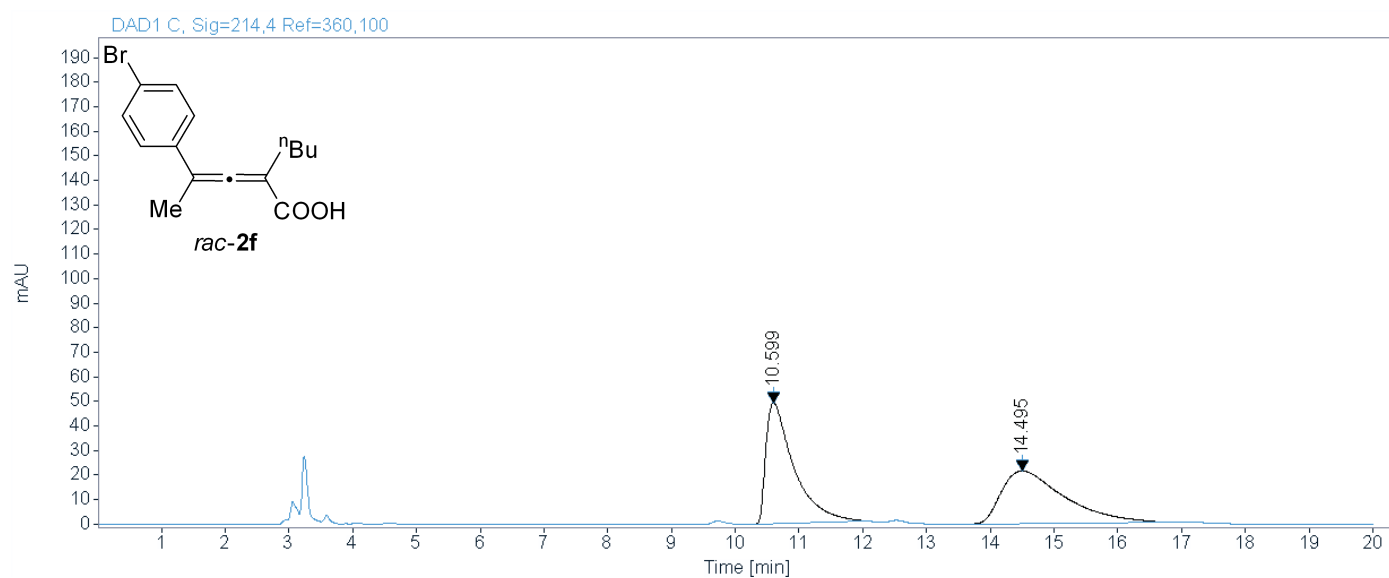

Signal: DAD1 C, Sig=214,4 Ref=360,100

| RT [min] | Width [min] | Height  | Area      | Area%    |
|----------|-------------|---------|-----------|----------|
| 10.599   | 0.5087      | 49.1622 | 1500.5134 | 50.1570  |
| 14.495   | 1.0269      | 21.4538 | 1491.1208 | 49.8430  |
|          | Sum         |         | 2991.6343 | 100.0000 |

wf-2-115-1-H  
Oct 28 2020  
SOLVENT: CDCl3  
NA = 4  
F1 = 400.130005 MHz  
F2 = 1.000000 MHz

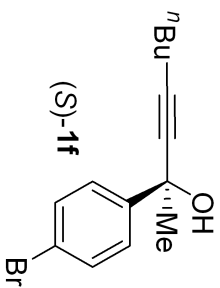

7.534  
7.528  
7.517  
7.512  
7.507  
7.479  
7.474  
7.469  
7.457  
7.453

2.307  
2.285  
2.268  
2.250  
1.707  
1.566  
1.548  
1.541  
1.529  
1.523  
1.510  
1.493  
1.468  
1.451  
1.438  
1.432  
1.419  
1.412  
1.394  
1.378  
0.942  
0.924  
0.906  
-0.000

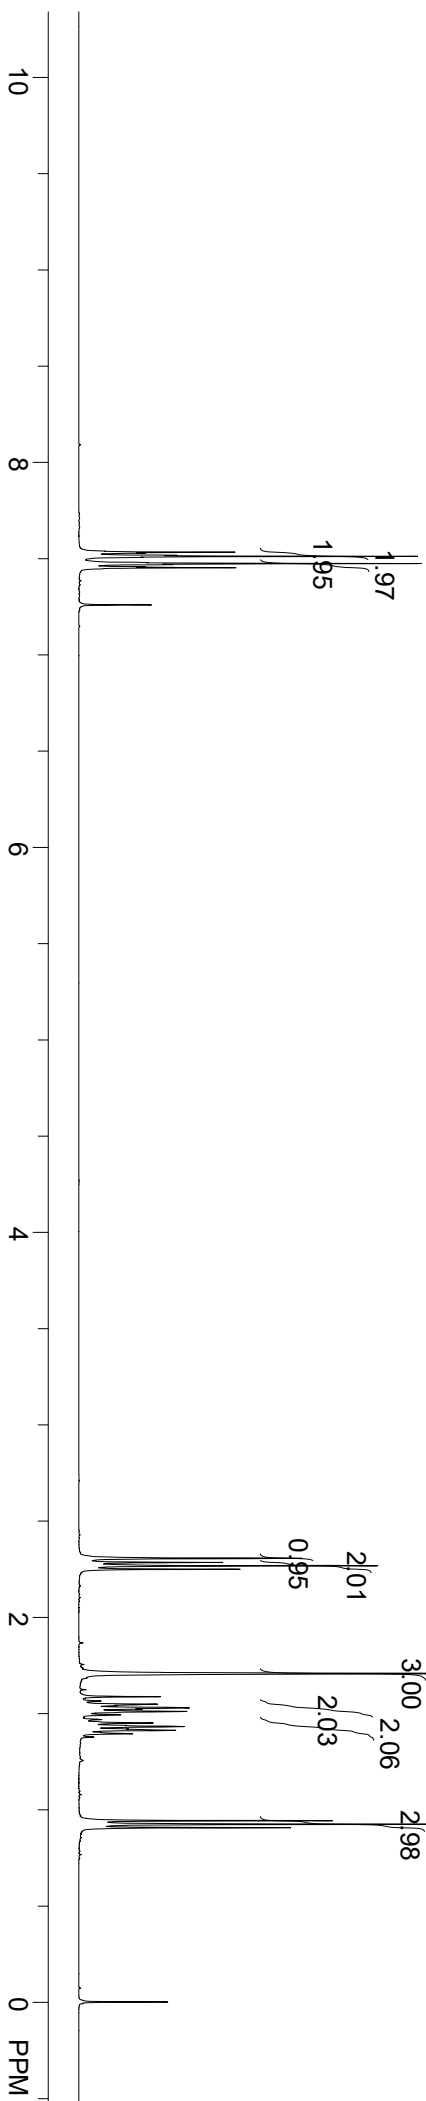

wj-2-115-1-C  
Oct 28 2020  
SOLVENT: CDCl3  
NA = 250  
F1 = 100.612770 MHz  
F2 = 1.000000 MHz

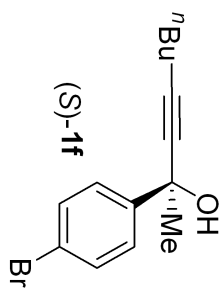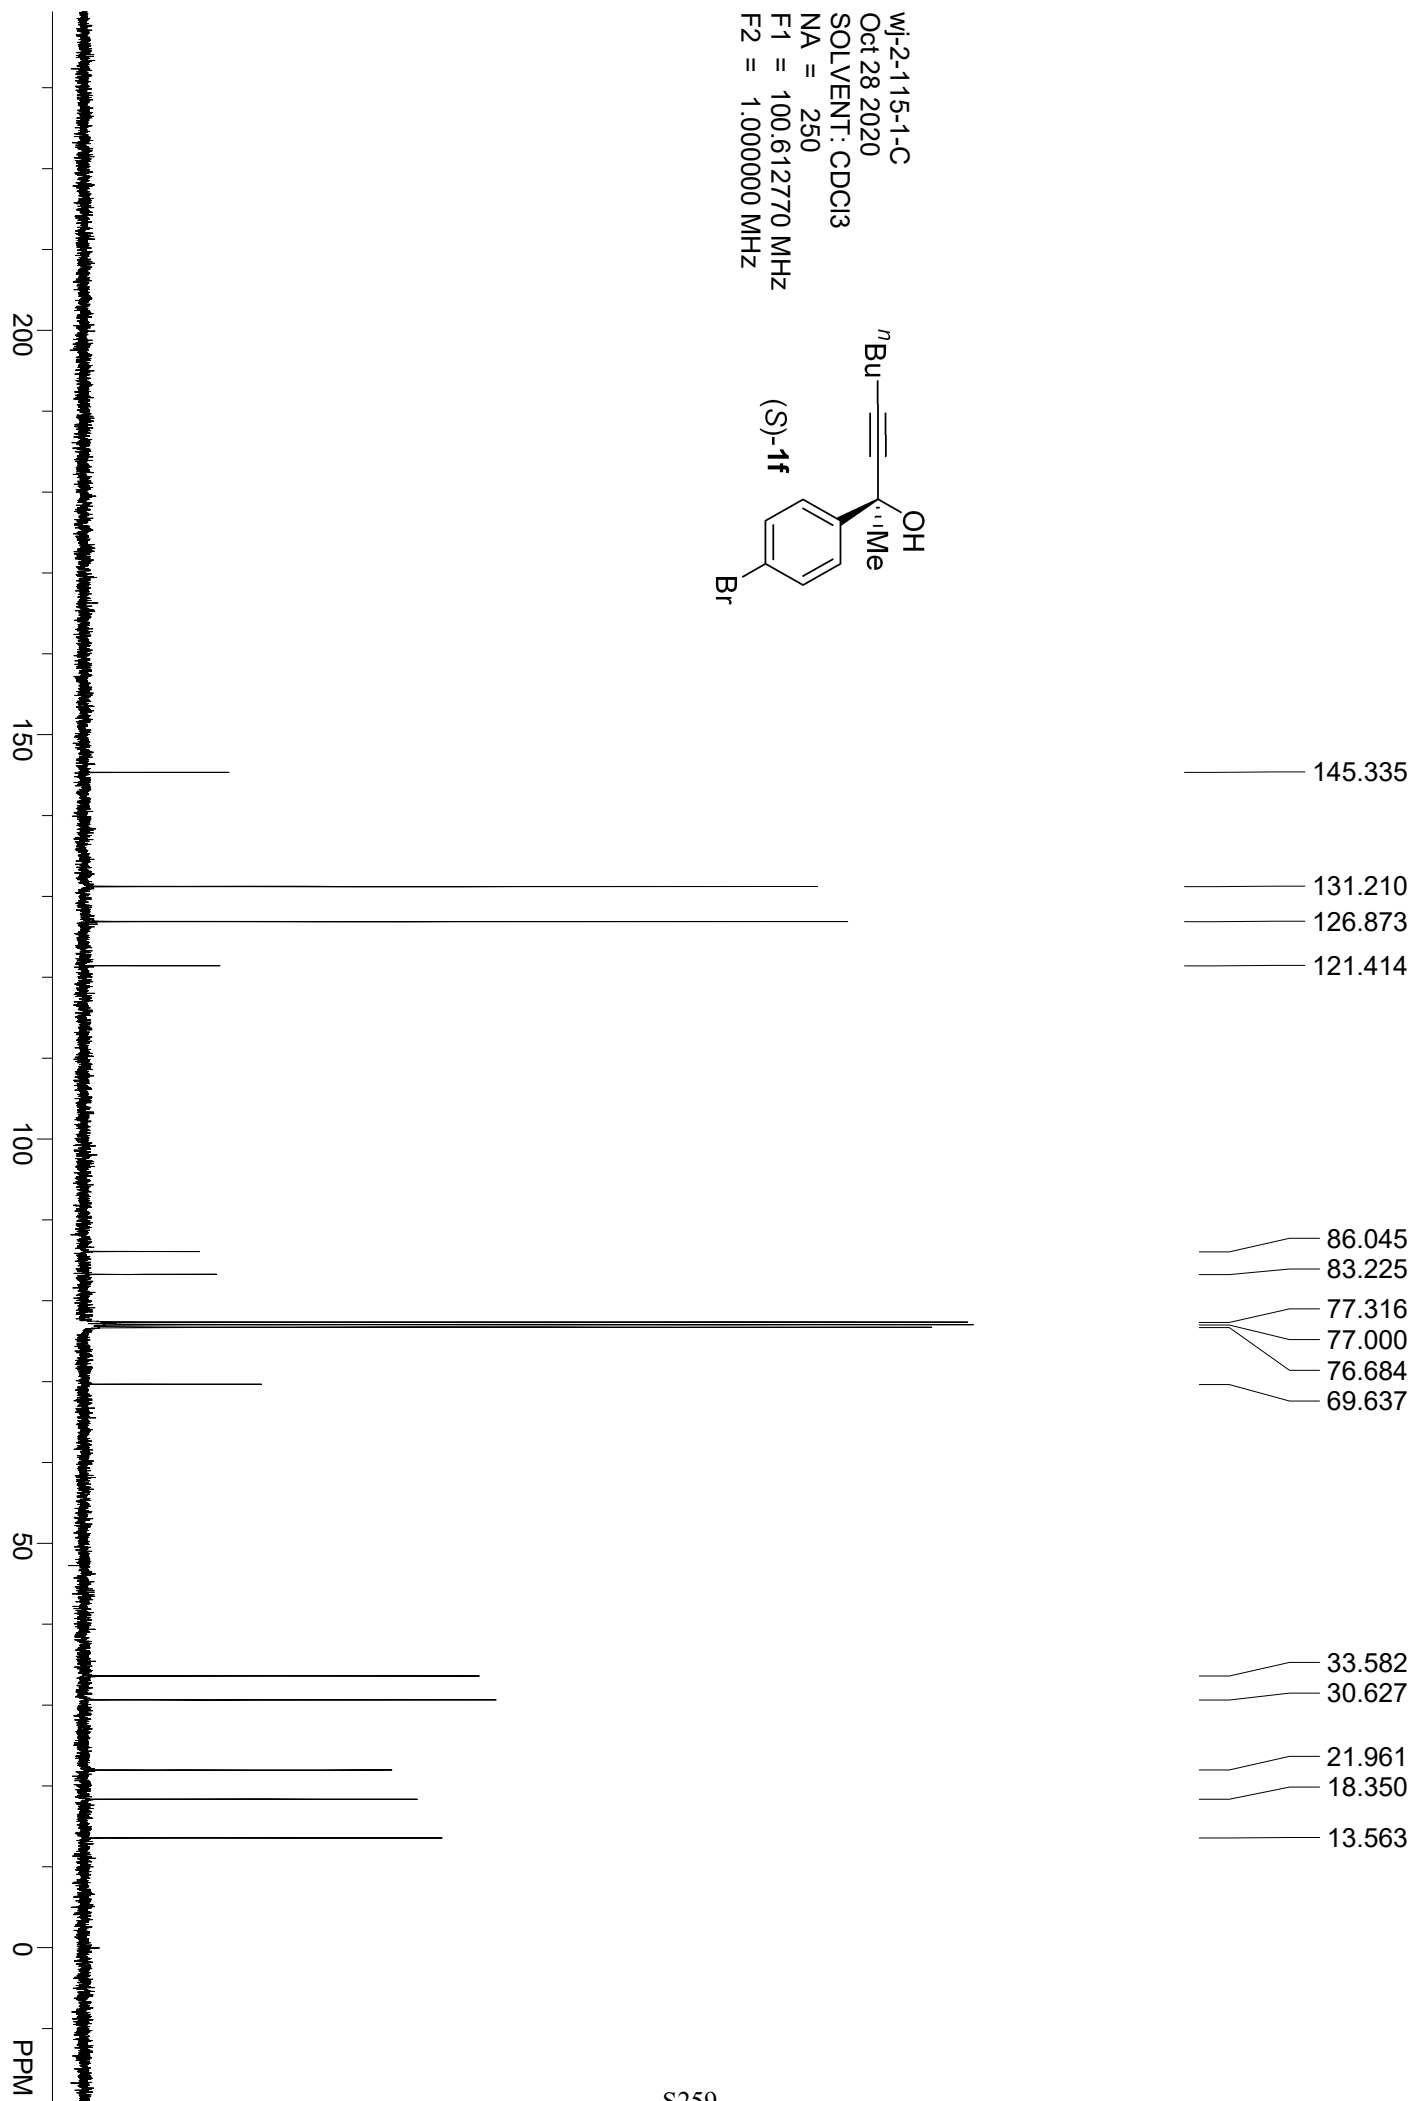

# Area Percent Report



Agilent Technologies

sample wj-2-115-1-AS-H-98-2-1.0-214

Data file: C:\Users\Public\Documents\ChemStation\1\Data\WHN 2020-10-27 22-39-12\034-P2-C1-wj-2-115-1.D

## Acquisition Data:

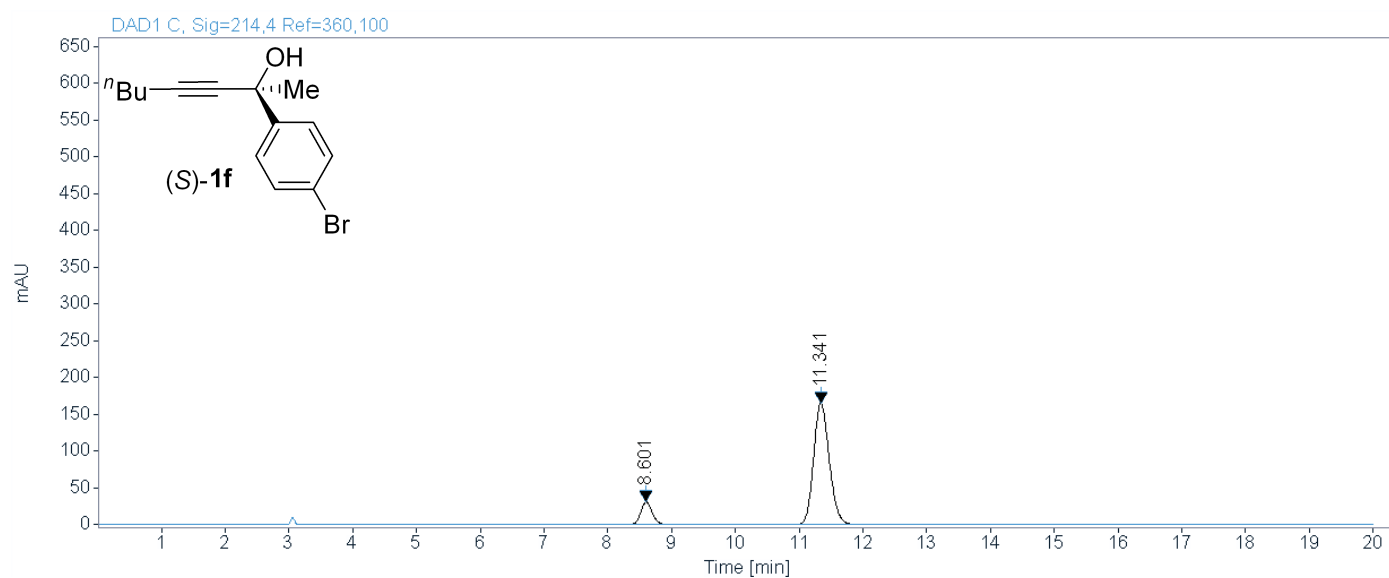

Signal: DAD1 C, Sig=214,4 Ref=360,100

| RT [min] | Width [min] | Height   | Area      | Area%    |
|----------|-------------|----------|-----------|----------|
| 8.601    | 0.1969      | 30.7501  | 392.3292  | 12.1958  |
| 11.341   | 0.2630      | 165.6306 | 2824.5901 | 87.8042  |
| Sum      |             |          | 3216.9193 | 100.0000 |

# Area Percent Report



Agilent Technologies

sample wj-2-115-1-rac-AS-H-98-2-1.0-214

Data file: C:\Users\Public\Documents\ChemStation\1\Data\WHN 2020-10-27 22-39-12\035-P2-C2-wj-2-115-1-rac.D

## Acquisition Data:

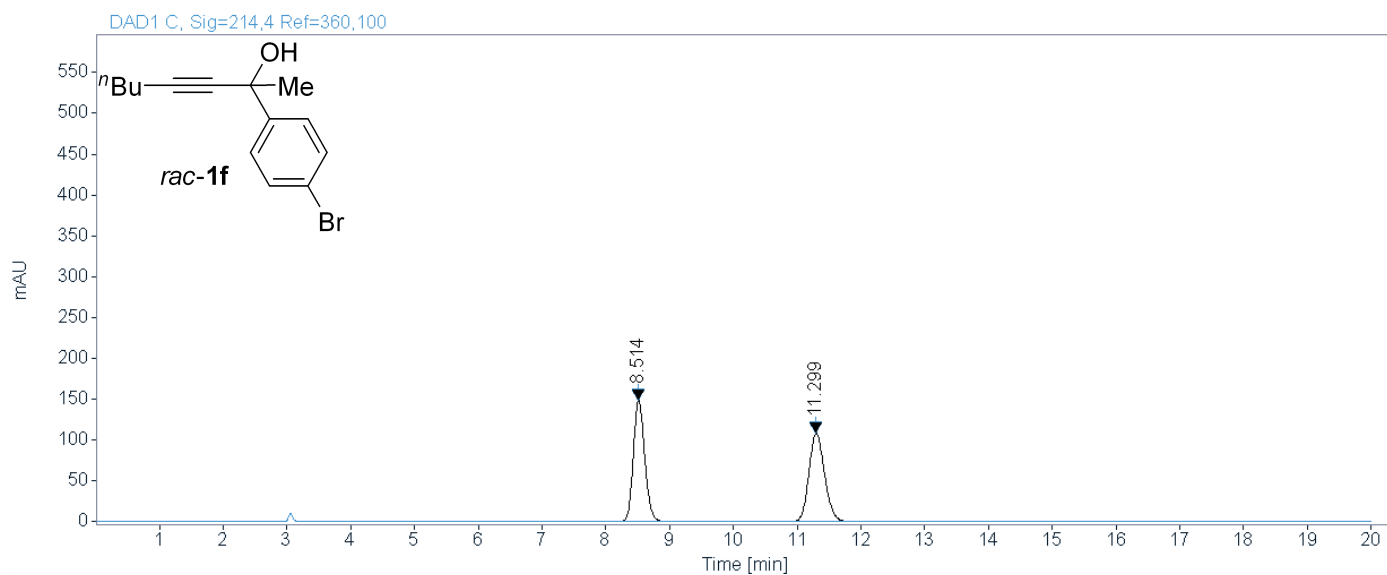

Signal: DAD1 C, Sig=214,4 Ref=360,100

| RT [min] | Width [min] | Height   | Area      | Area%    |
|----------|-------------|----------|-----------|----------|
| 8.514    | 0.1930      | 149.1293 | 1853.8256 | 50.0083  |
| 11.299   | 0.2633      | 108.4760 | 1853.2098 | 49.9917  |
|          |             | Sum      | 3707.0354 | 100.0000 |

WJ-2-119-2-H  
Oct 31 2020  
SOLVENT: CDCl3  
NA = 4  
F1 = 400.130005 MHz  
F2 = 1.000000 MHz

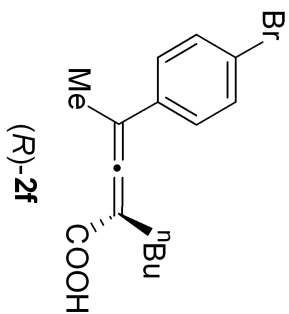

7.471  
7.451  
7.258  
7.247  
7.227

2.339  
2.321  
2.303  
2.168

1.459  
1.442  
1.425  
1.365  
1.348  
1.330  
1.313  
0.895  
0.877  
0.860  
0.000

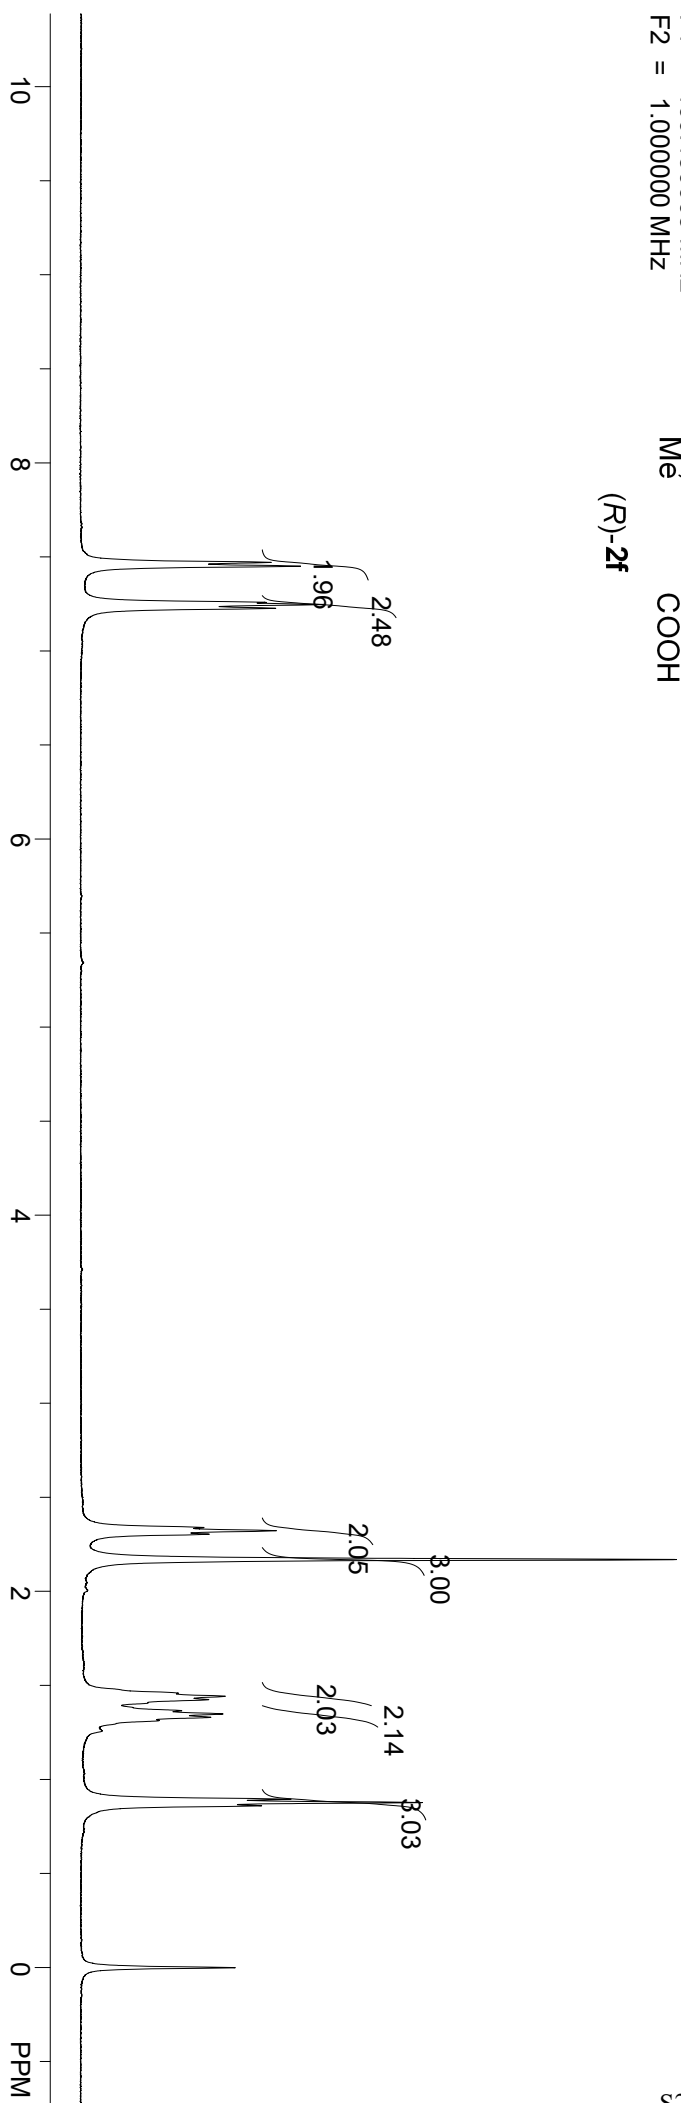

wj-2-119-2-C  
Oct 31 2020  
SOLVENT: CDCl3  
NA = 200  
F1 = 100.612770 MHz  
F2 = 1.000000 MHz

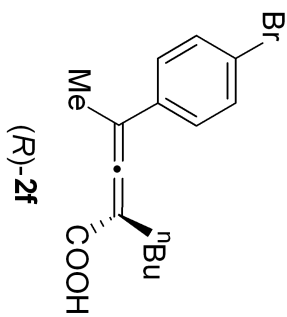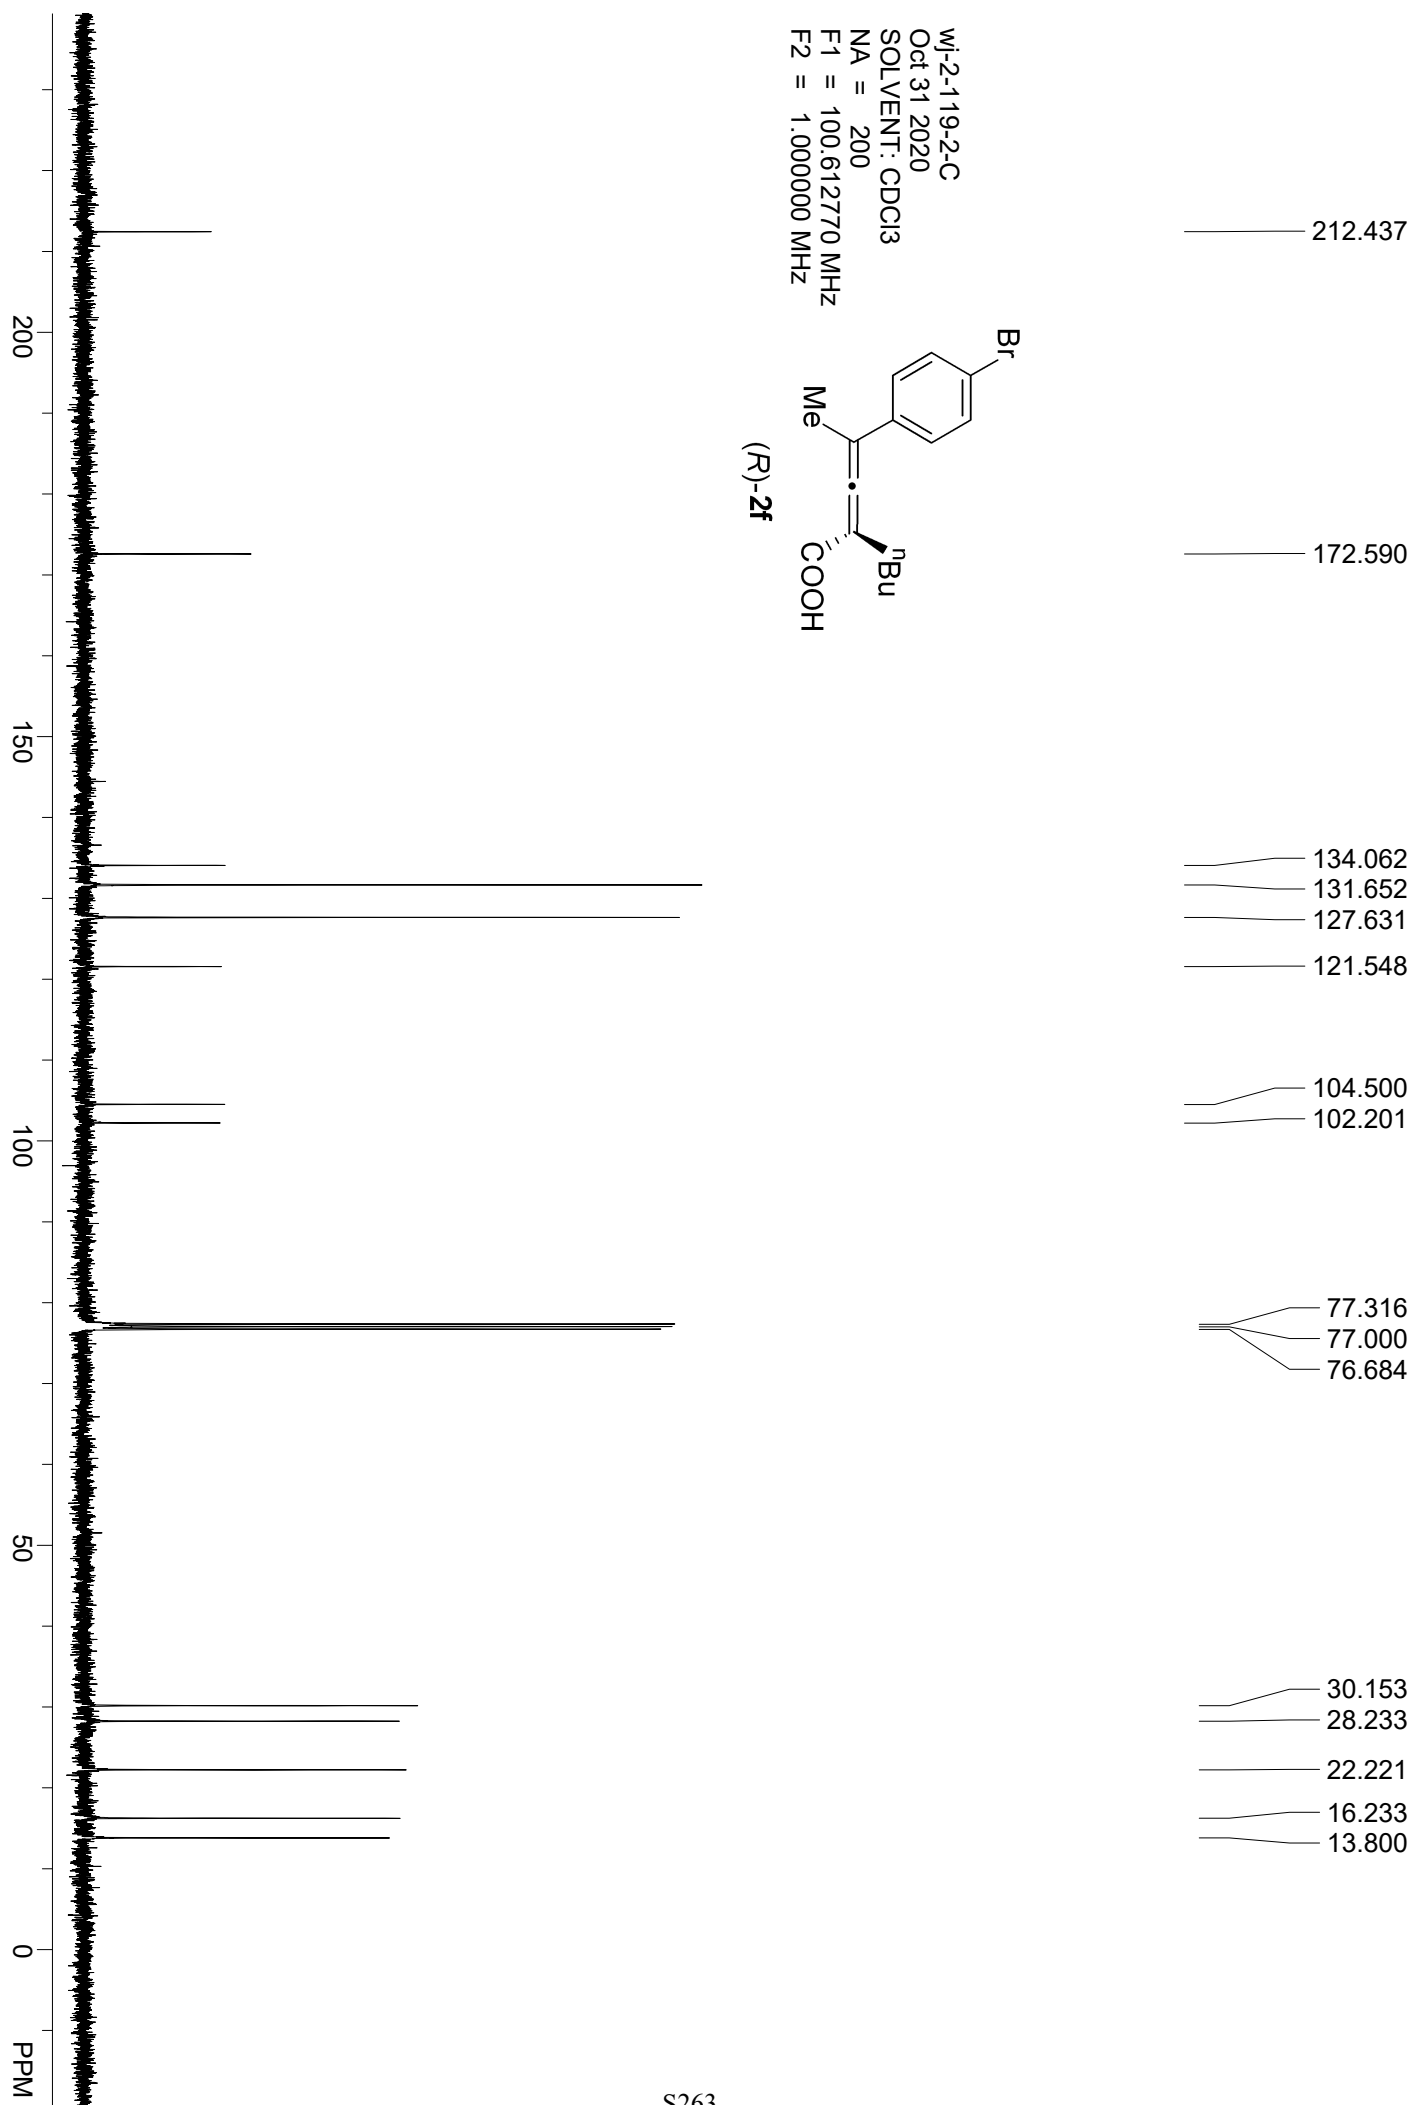

# Area Percent Report



Agilent Technologies

sample wj-2-119-2-AS-H-98-2-1.0-214

Data file: C:\Users\Public\Documents\ChemStation\1\Data\WJ\_LC 2020-10-31 17-12-21\004-P2-C3-wj-2-119-2.D

## Acquisition Data:

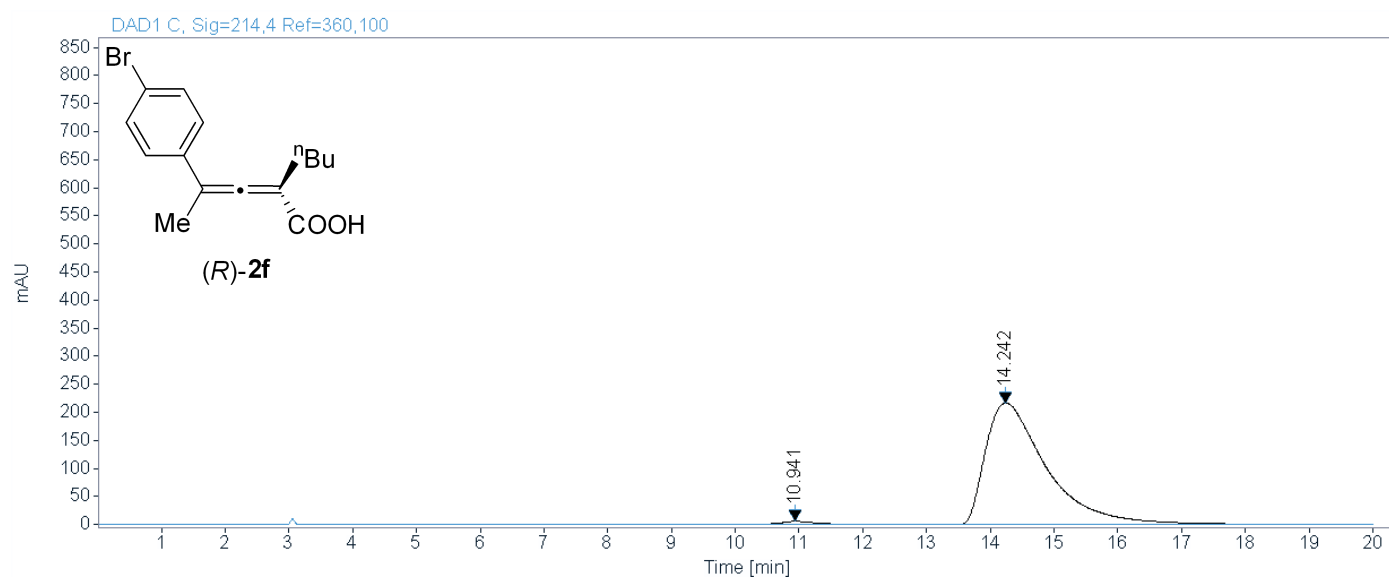

Signal: DAD1 C, Sig=214,4 Ref=360,100

| RT [min] | Width [min] | Height   | Area       | Area%    |
|----------|-------------|----------|------------|----------|
| 10.941   | 0.5602      | 5.8755   | 235.7755   | 1.6035   |
| 14.242   | 1.0260      | 216.9615 | 14467.9209 | 98.3965  |
| Sum      |             |          | 14703.6964 | 100.0000 |



# Area Percent Report



Agilent Technologies

sample wj-2-119-2-rac-AS-H-98-2-1.0-214

Data file: C:\Users\Public\Documents\ChemStation\1\Data\WJ\_LC 2020-10-31 17-12-21\005-P2-C4-wj-2-119-2-rac.D

## Acquisition Data:

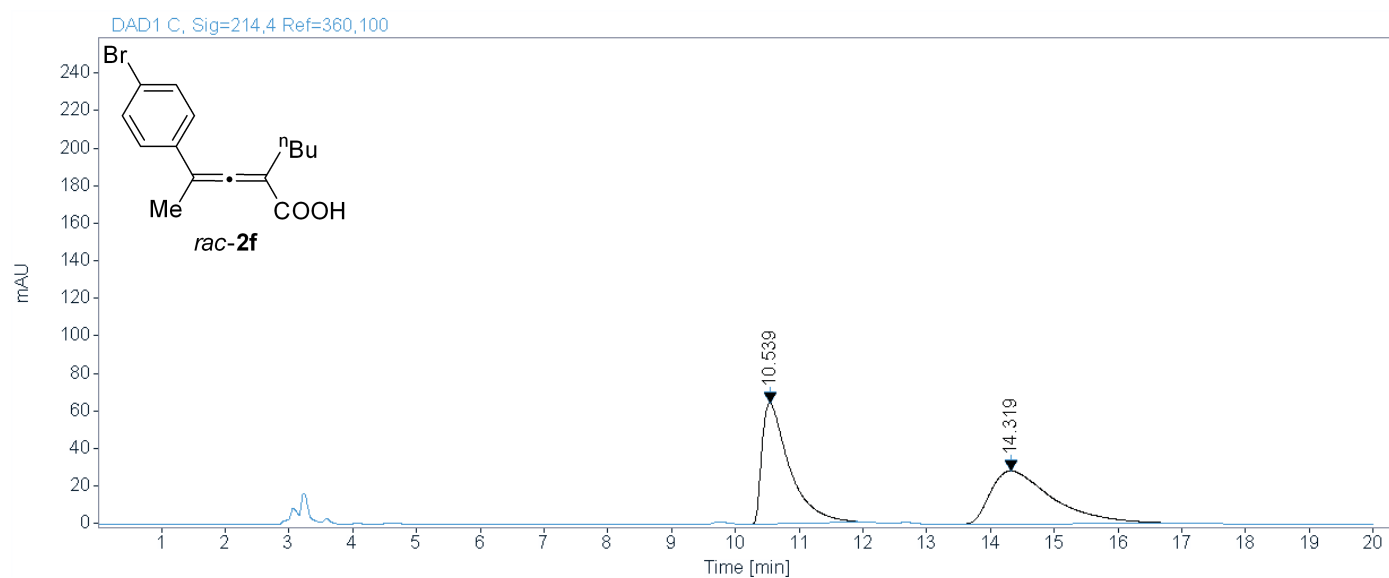

Signal: DAD1 C, Sig=214,4 Ref=360,100

| RT [min] | Width [min] | Height  | Area      | Area%    |
|----------|-------------|---------|-----------|----------|
| 10.539   | 0.4961      | 64.4313 | 1917.8356 | 49.8704  |
| 14.319   | 0.9769      | 28.2956 | 1927.8069 | 50.1296  |
| Sum      |             |         | 3845.6425 | 100.0000 |

wj-1-163-H  
 June 30 2020  
 SOLVENT: CDCl3  
 NA = 4  
 F1 = 400.130005 MHz  
 F2 = 1.000000 MHz

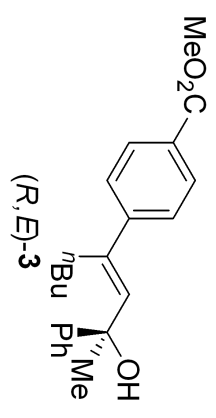

- 7.990
- 7.969
- 7.545
- 7.527
- 7.397
- 7.377
- 7.363
- 7.345
- 7.325
- 7.266
- 7.258
- 7.247
- 7.229
- 6.177
  
- 3.911
- 2.447
- 2.437
- 2.433
- 2.423
- 2.412
- 2.400
- 2.037
- 1.740
- 1.039
- 1.032
- 1.021
- 1.014
- 1.003
- 0.990
- 0.983
- 0.977
- 0.967
- 0.956
- 0.939
- 0.901
- 0.885
- 0.878
- 0.870
- 0.862
- 0.855
- 0.846
- 0.839
- 0.660
- 0.643
- 0.625
- 0.000

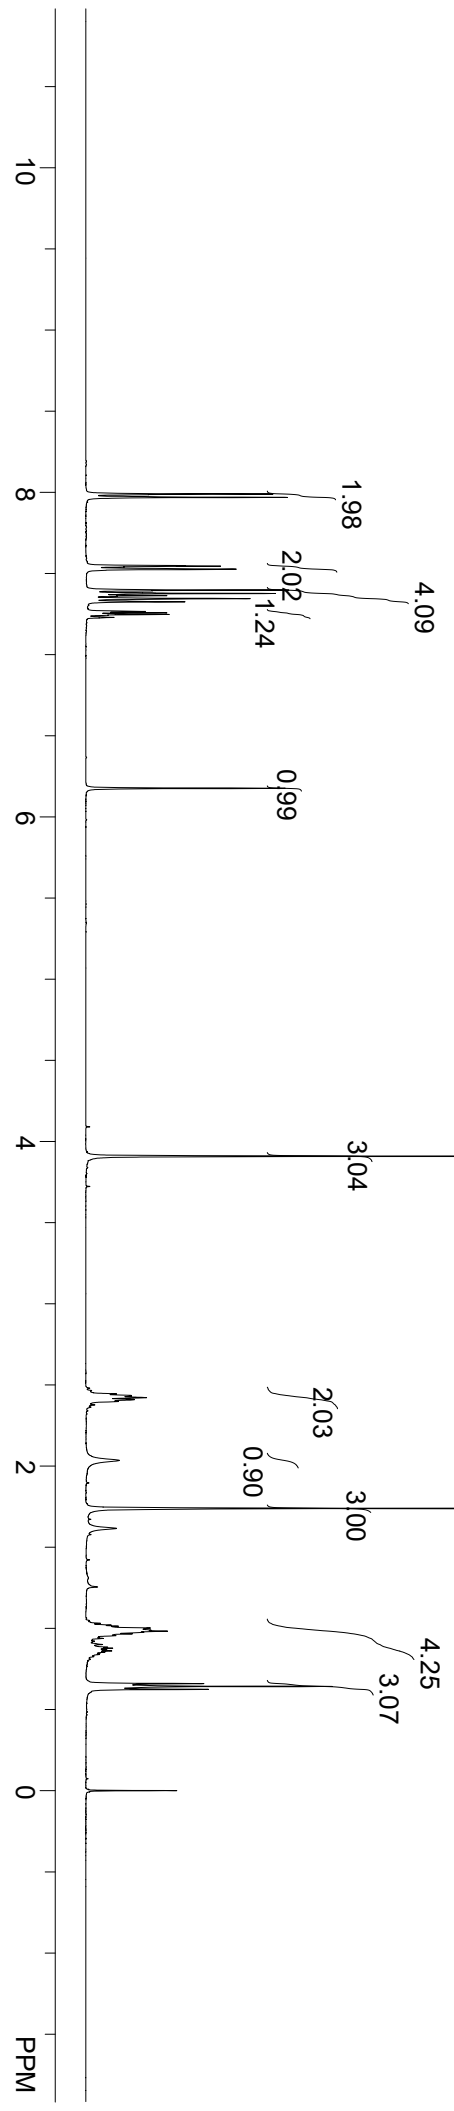

WJ-1-163-C  
June 30 2020  
SOLVENT: CDCl3  
NA = 256  
F1 = 100.612770 MHz  
F2 = 1.000000 MHz

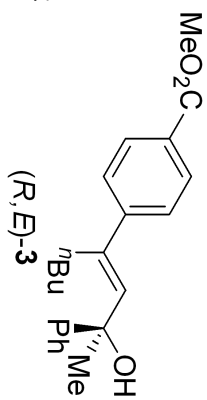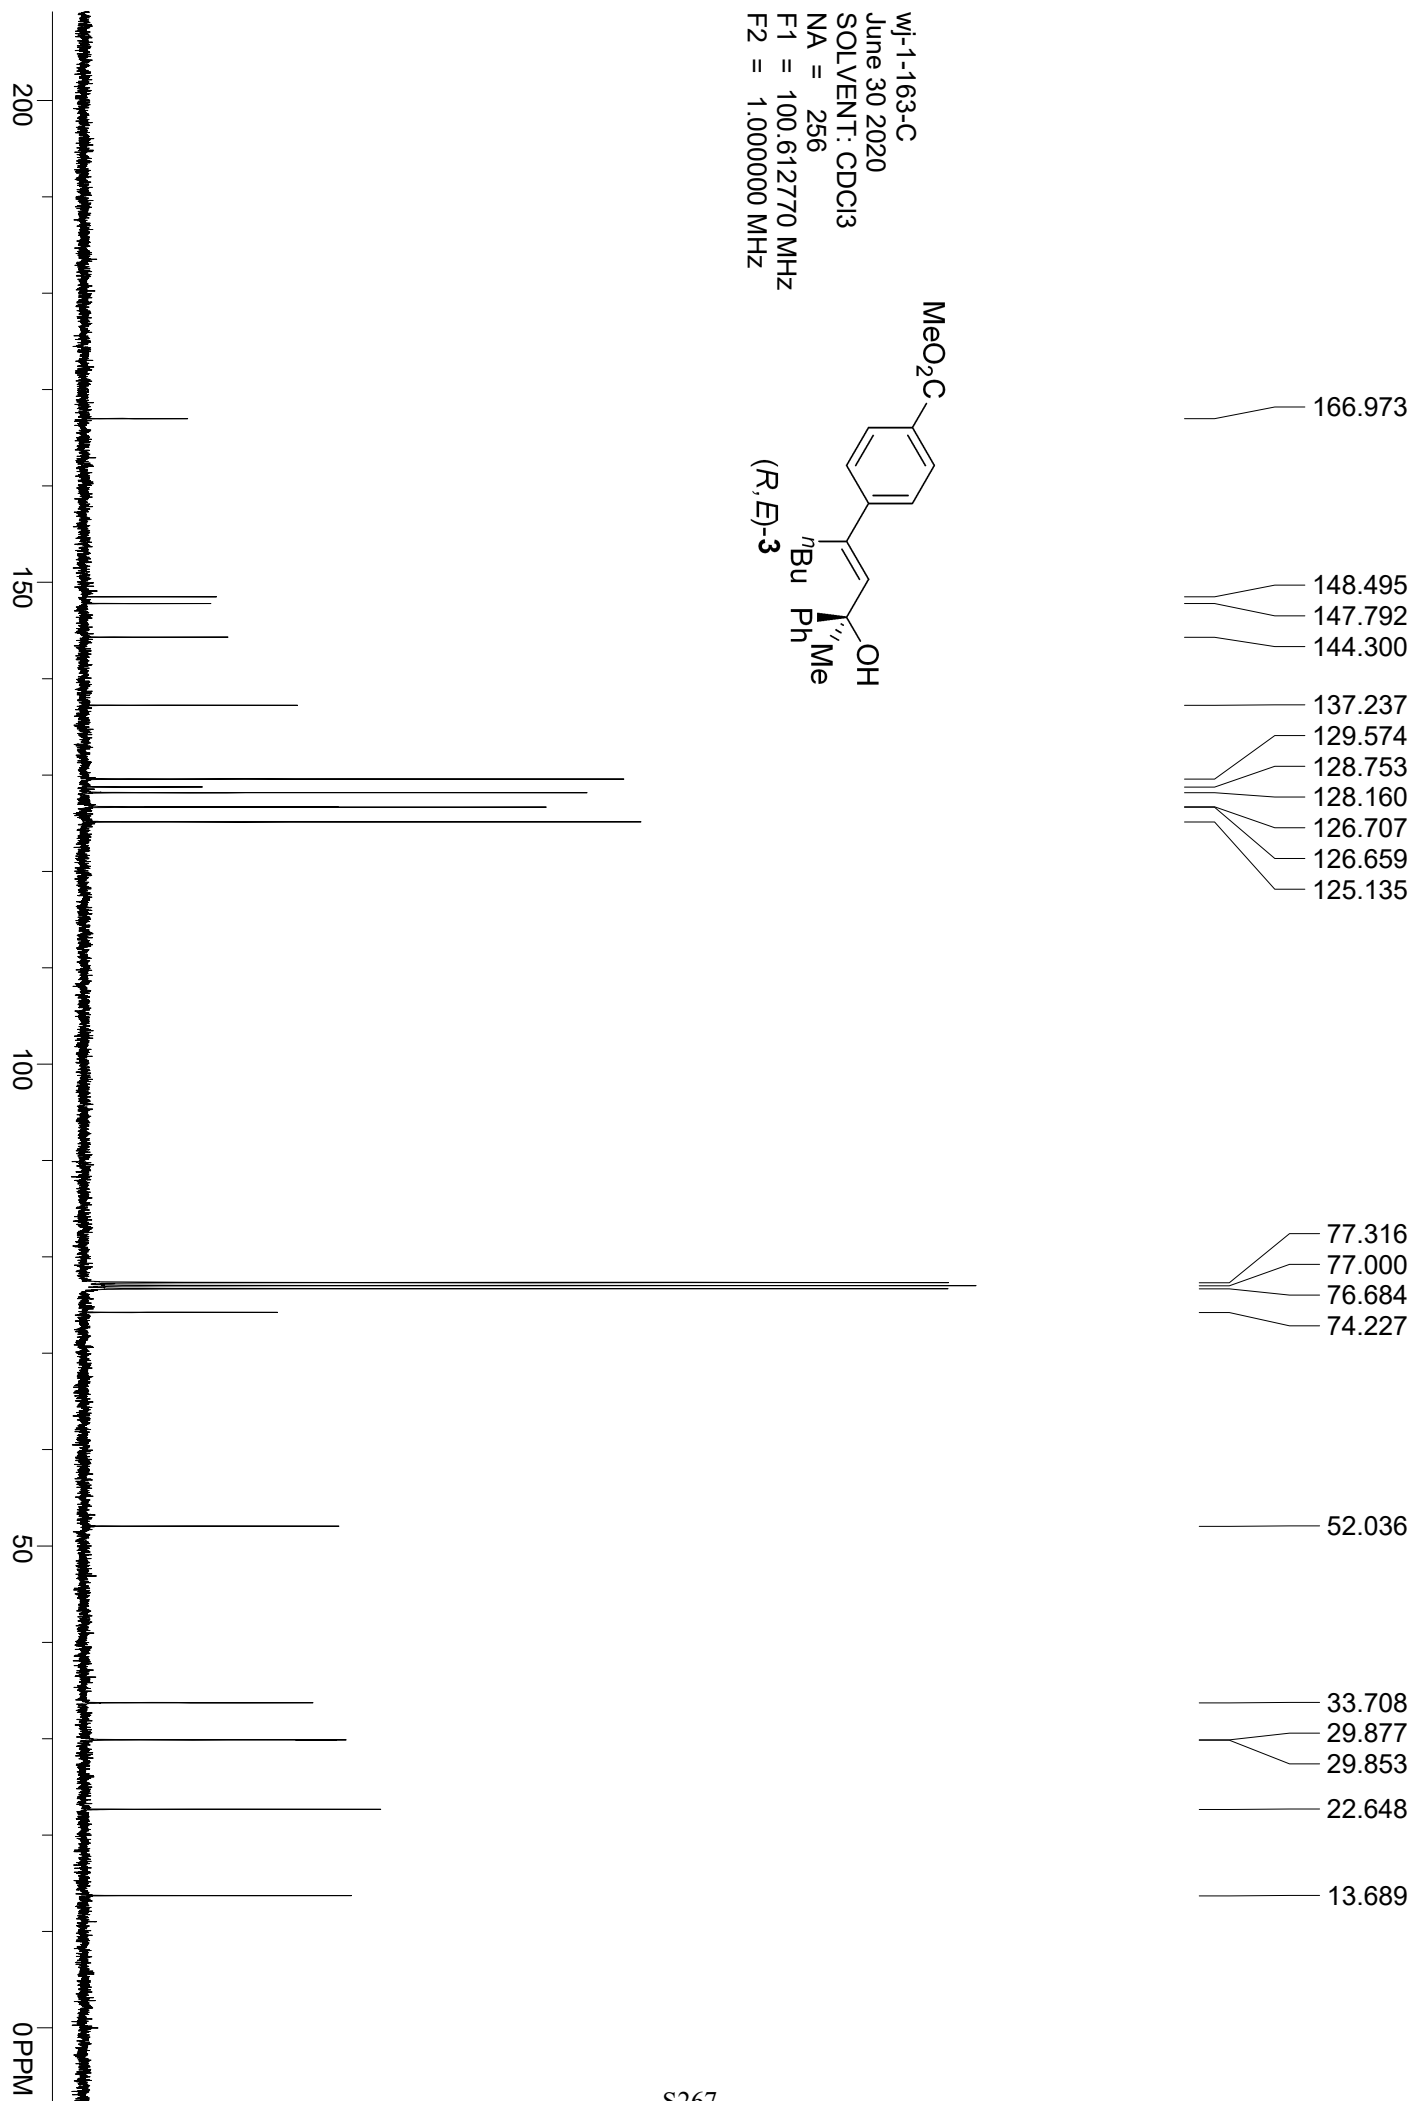

# Area Percent Report



Agilent Technologies

sample wj-1-163-AS-H-95-5-1.0-214

Data file: C:\Users\Public\Documents\ChemStation\1\Data\QAN 2020-06-29 08-41-07\085-P2-C1-wj-1-163.D

## Acquisition Data:

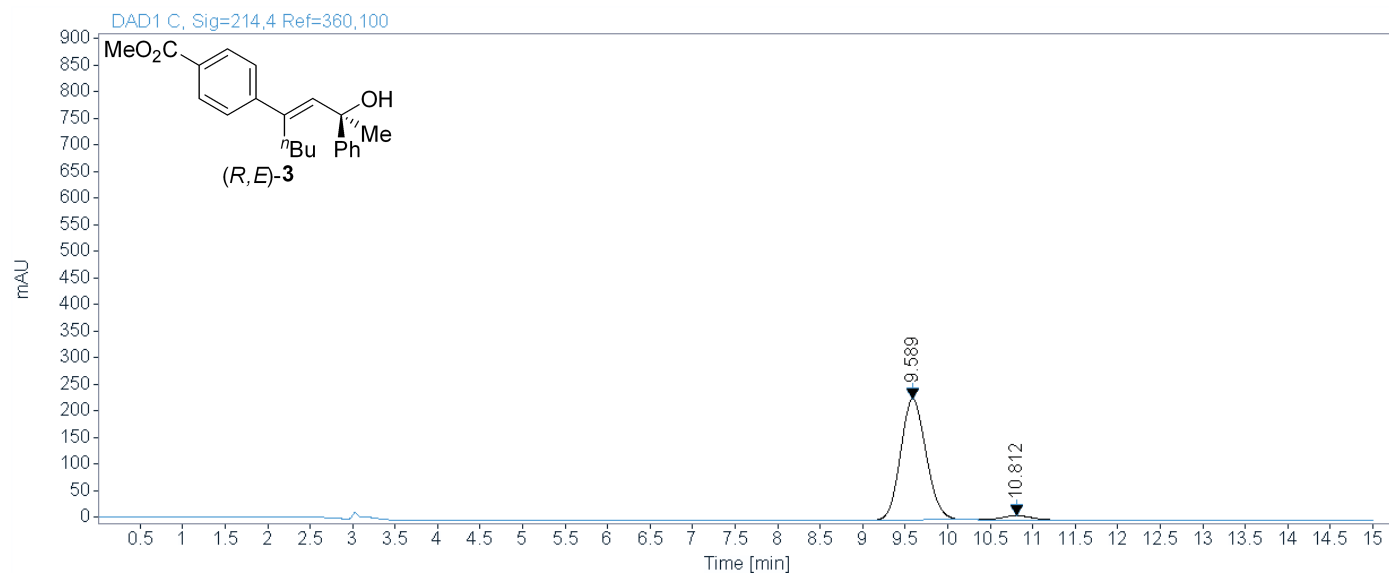

Signal: DAD1 C, Sig=214,4 Ref=360,100

| RT [min] | Width [min] | Height   | Area      | Area%    |
|----------|-------------|----------|-----------|----------|
| 9.589    | 0.3267      | 227.6091 | 4774.8540 | 95.9432  |
| 10.812   | 0.4132      | 8.1444   | 201.8971  | 4.0568   |
| Sum      |             |          | 4976.7511 | 100.0000 |

# Area Percent Report



sample wj-1-163-rac-AS-H-95-5-1.0-214

Data file: C:\Users\Public\Documents\ChemStation\1\Data\QAN 2020-06-29 08-41-07\086-P2-C2-wj-1-163-rac.D

## Acquisition Data:

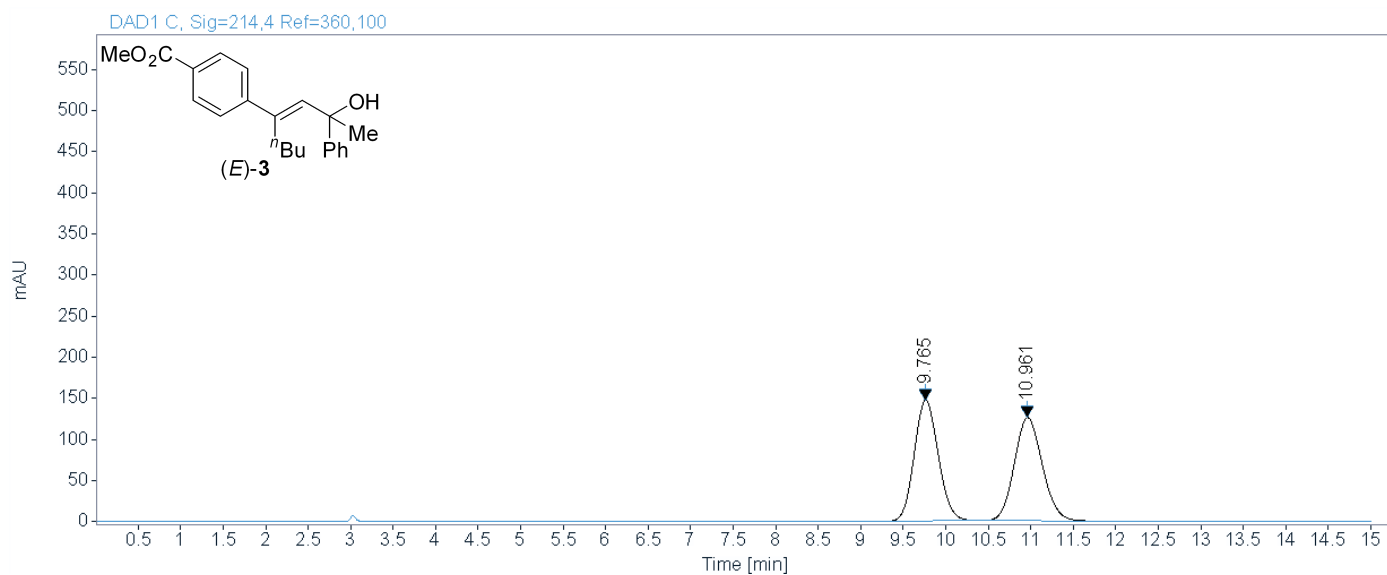

Signal: DAD1 C, Sig=214,4 Ref=360,100

| RT [min] | Width [min] | Height   | Area      | Area%    |
|----------|-------------|----------|-----------|----------|
| 9.765    | 0.3076      | 147.5005 | 2902.2227 | 50.0799  |
| 10.961   | 0.3587      | 125.6307 | 2892.9604 | 49.9201  |
|          | Sum         |          | 5795.1831 | 100.0000 |

7.988  
7.967  
7.548  
7.544  
7.526  
7.524  
7.395  
7.374  
7.361  
7.343  
7.323  
7.263  
7.261  
7.256  
7.250  
7.245  
7.227  
6.174

3.909

2.447  
2.438  
2.434  
2.425  
2.413  
2.402  
2.038  
1.740  
1.022  
1.016  
1.002  
0.992  
0.985  
0.969  
0.959  
0.904  
0.888  
0.881  
0.873  
0.865  
0.859  
0.661  
0.644  
0.626  
-0.000

wj-1-139-H  
June 10 2020  
SOLVENT: CDCl3  
NA = 4  
F1 = 400.130005 MHz  
F2 = 1.000000 MHz

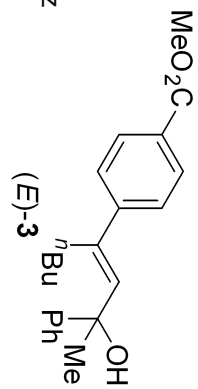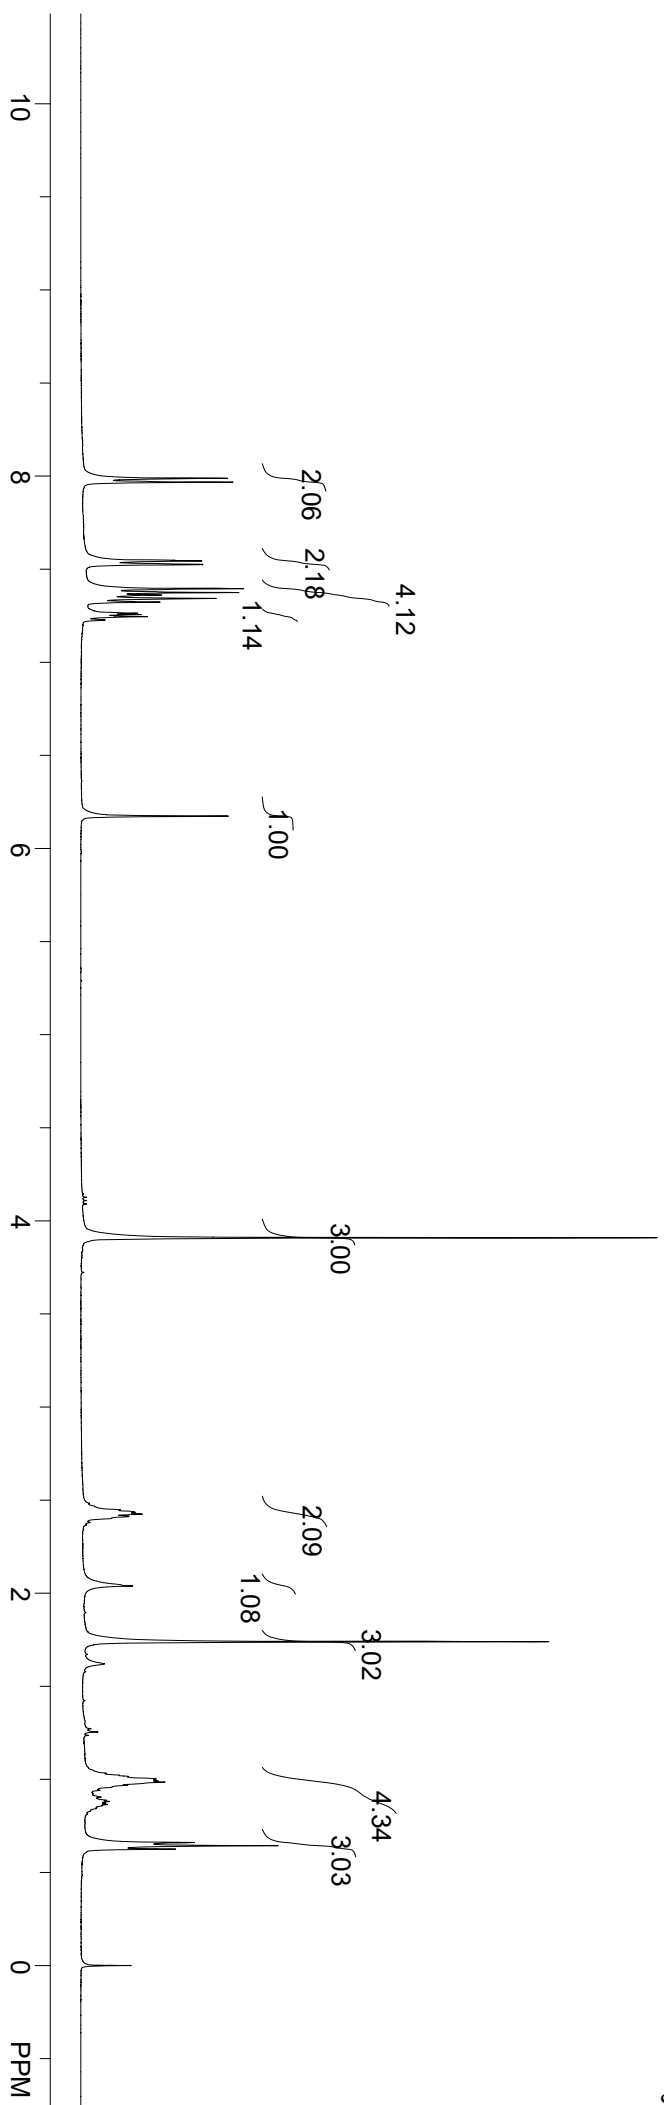

wj-1-139-C  
June 10 2020  
SOLVENT: CDCl3  
NA = 256  
F1 = 100.612770 MHz  
F2 = 1.000000 MHz

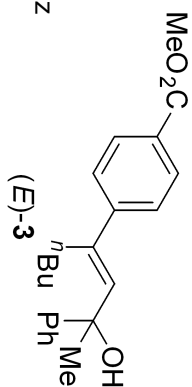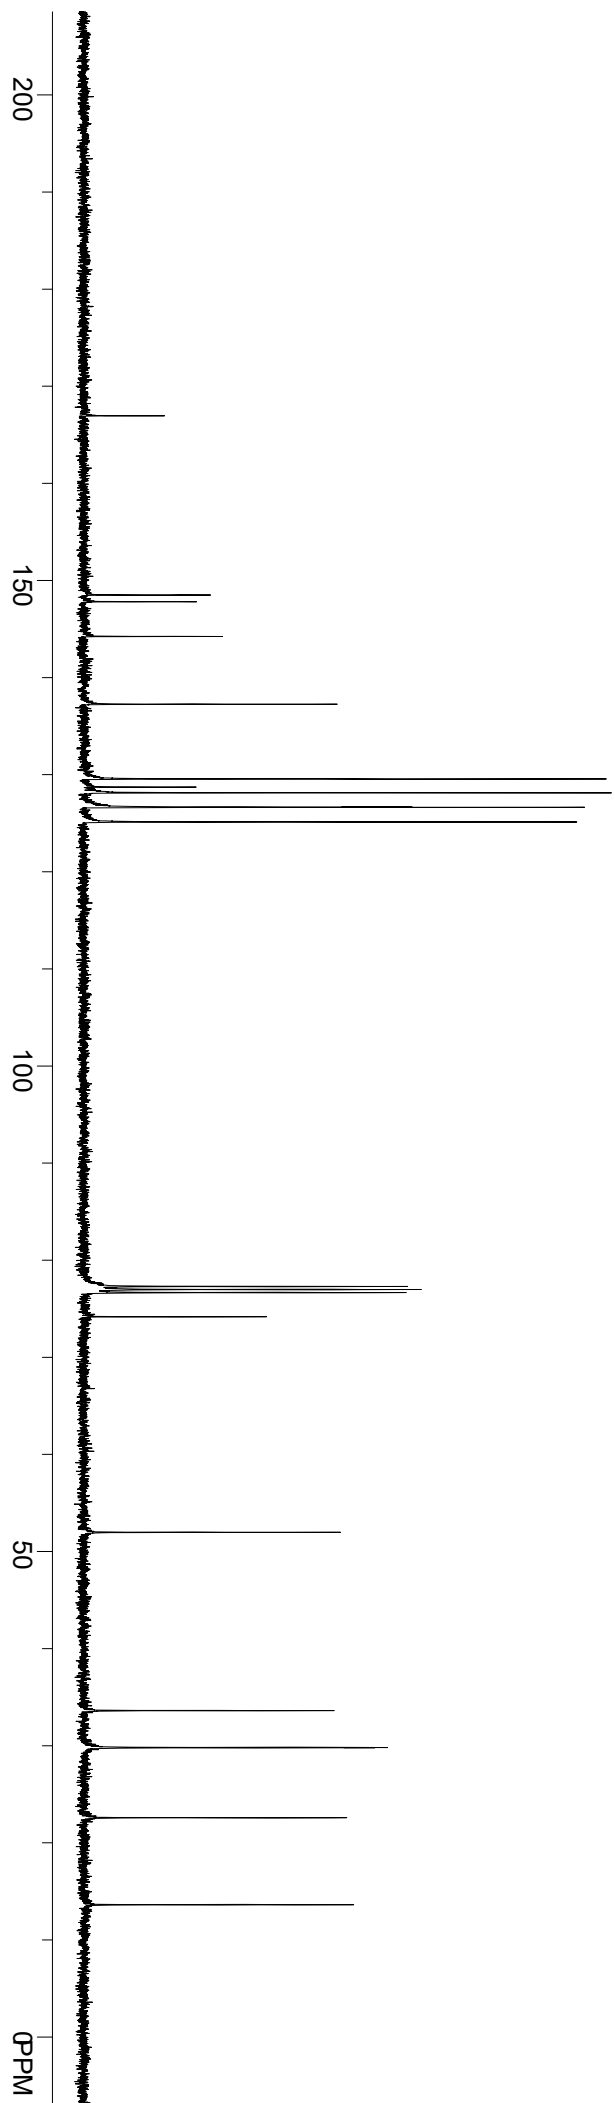

166.957

148.503

147.808

144.229

137.253

129.559

128.721

128.137

126.675

126.644

125.135

77.316

77.000

76.684

74.195

52.004

33.653

29.853

29.829

22.632

13.666

wj-1-181-H  
Jul 14 2020  
SOLVENT: CDCl3  
NA = 4  
F1 = 400.130005 MHz  
F2 = 1.000000 MHz

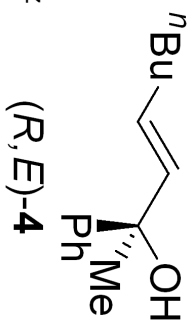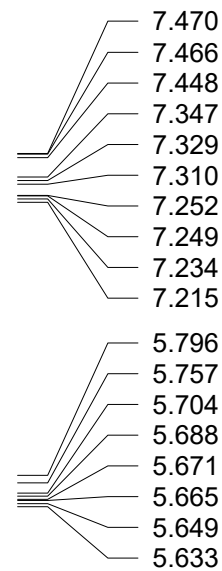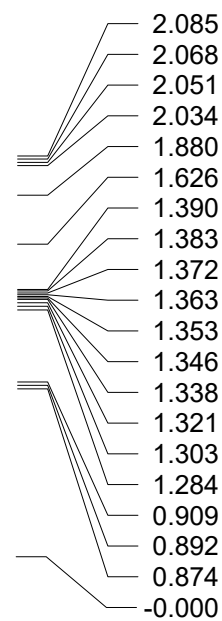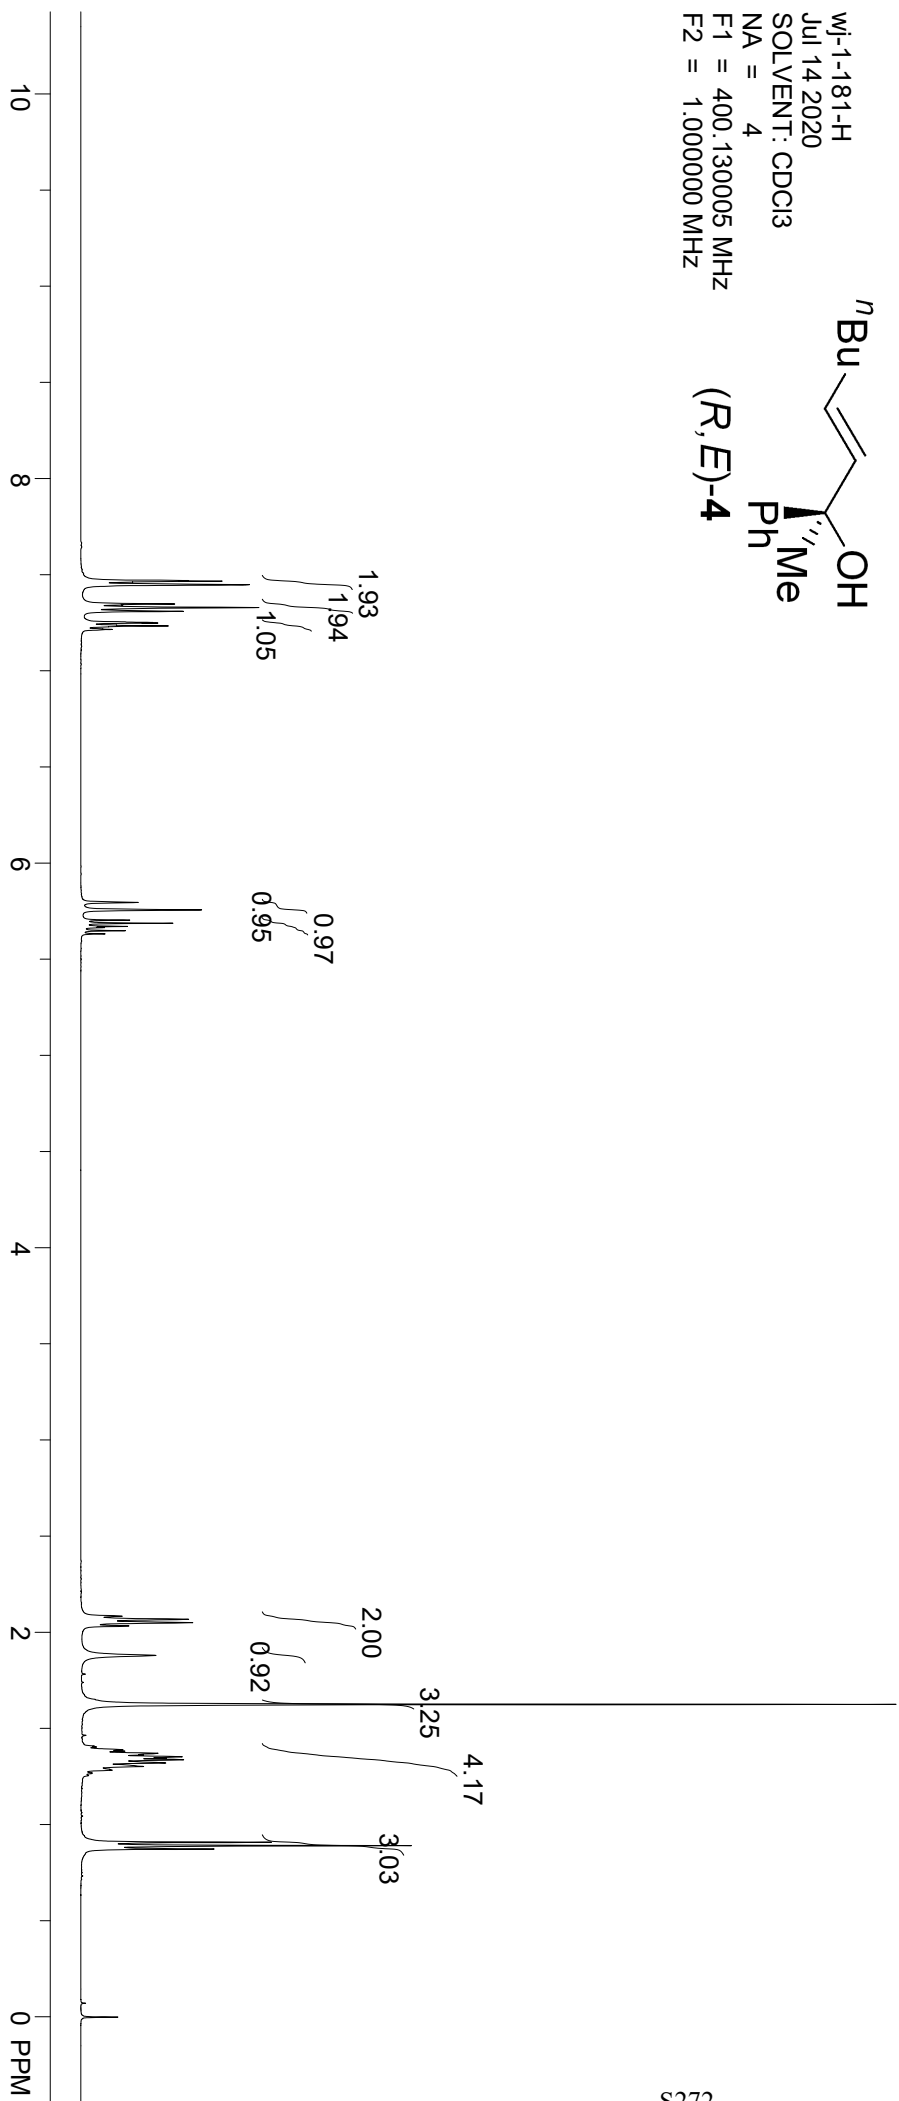



wj-1-181-C  
Jul 14 2020  
SOLVENT: CDCl3  
NA = 204  
F1 = 100.612770 MHz  
F2 = 1.000000 MHz

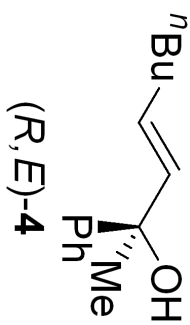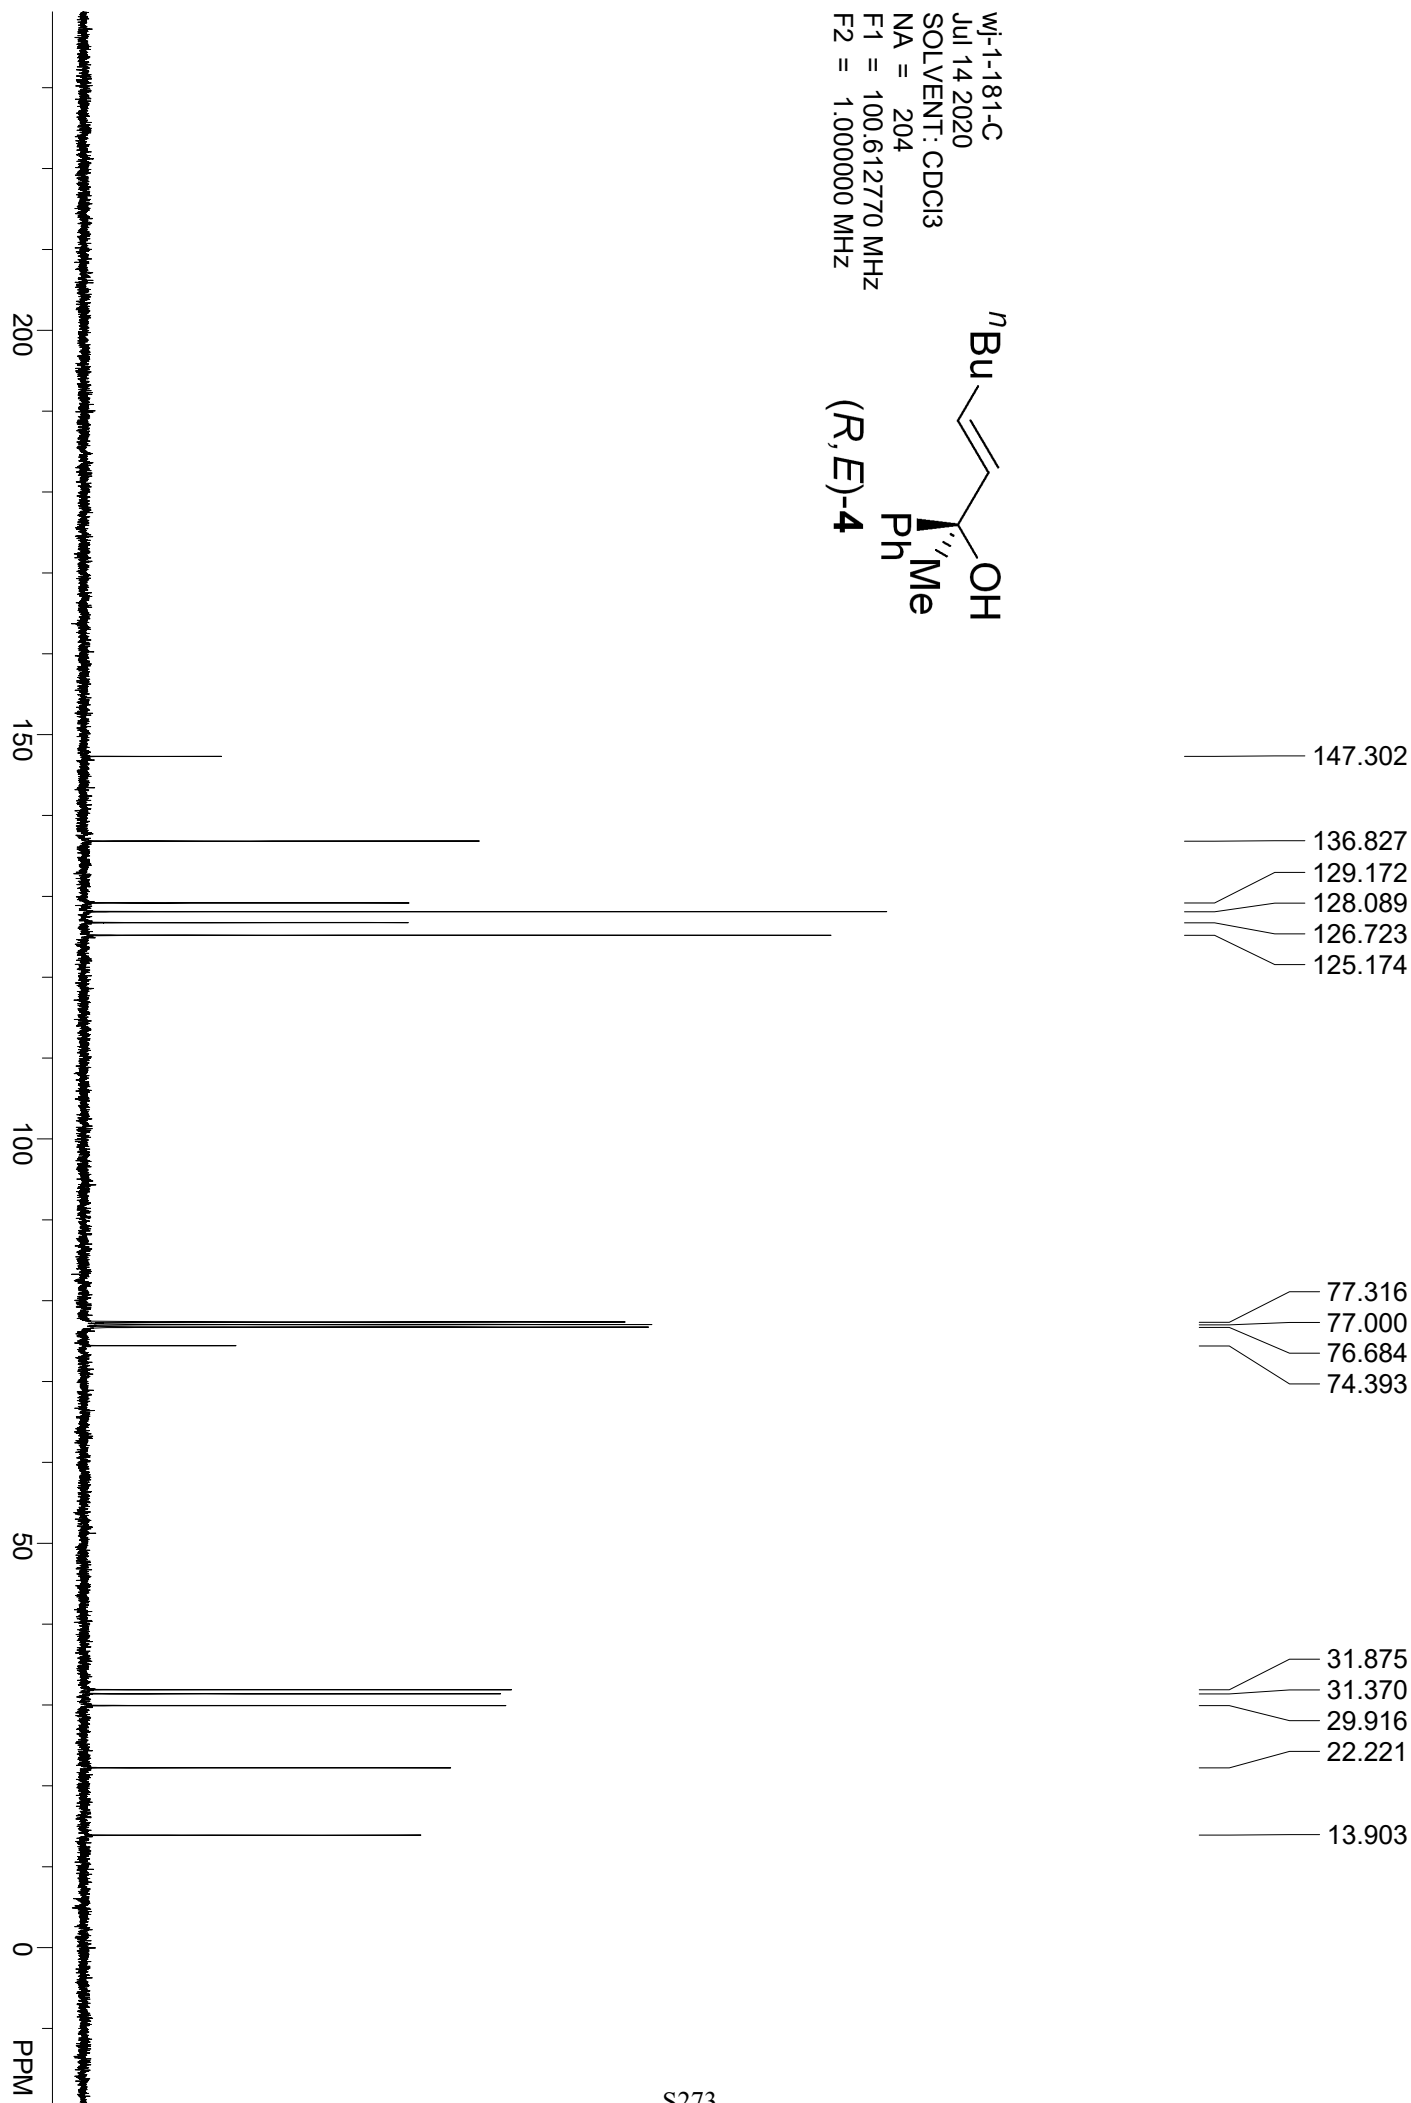

# Area Percent Report



Agilent Technologies

sample wj-1-181-AS-H-98-2-1.0-214

Data file: C:\Users\Public\Documents\ChemStation\1\Data\zwf-allenioc acid\_LC 2020-07-14 08-35-46\040-P2-C1-wj-1-181.D

## Acquisition Data:

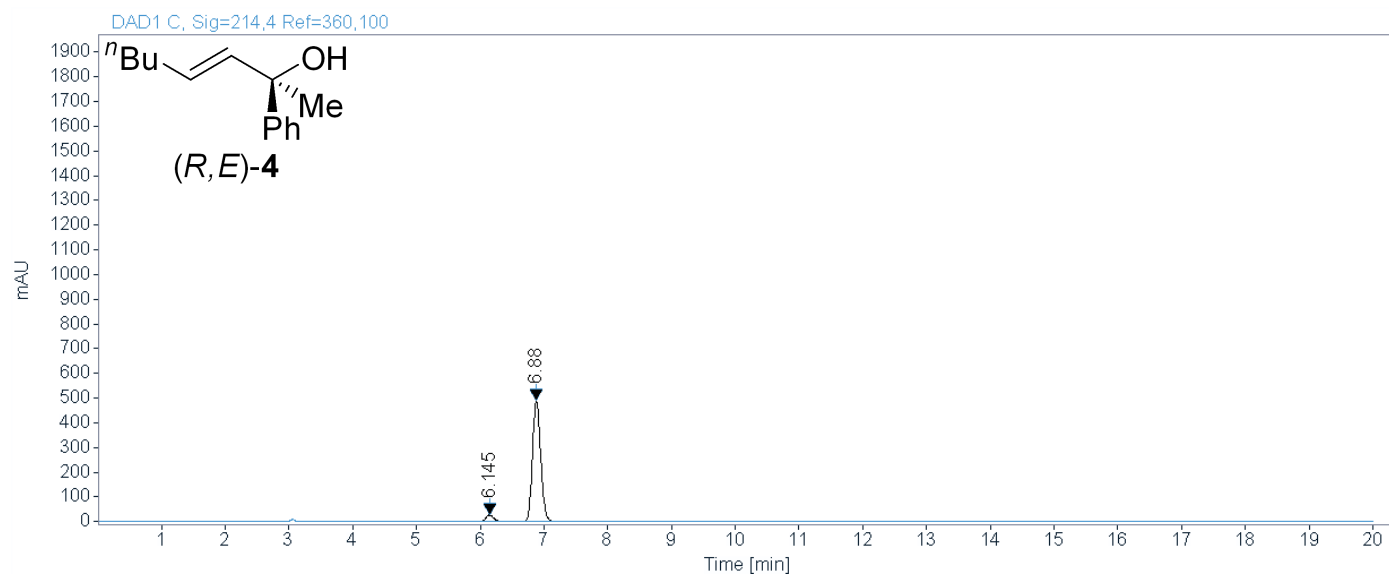

Signal: DAD1 C, Sig=214,4 Ref=360,100

| RT [min] | Width [min] | Height   | Area      | Area%    |
|----------|-------------|----------|-----------|----------|
| 6.145    | 0.1237      | 27.4706  | 220.7224  | 4.7083   |
| 6.880    | 0.1507      | 494.0445 | 4467.1943 | 95.2917  |
| Sum      |             |          | 4687.9167 | 100.0000 |

# Area Percent Report



sample wj-1-181-rac-AS-H-98-2-1.0-214

Data file: C:\Users\Public\Documents\ChemStation\1\Data\zwf-allenioc acid\_LC 2020-07-14 08-35-46\041-P2-C2-wj-1-181-rac.D

## Acquisition Data:

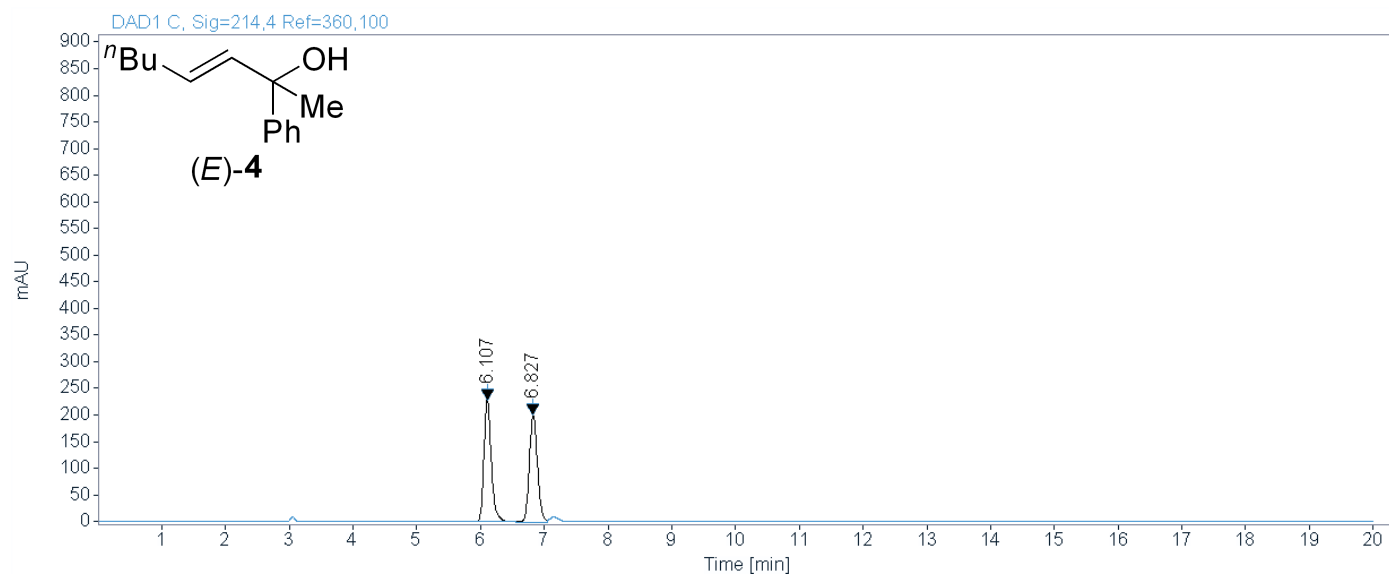

Signal: DAD1 C, Sig=214,4 Ref=360,100

| RT [min] | Width [min] | Height   | Area      | Area%    |
|----------|-------------|----------|-----------|----------|
| 6.107    | 0.1332      | 228.7032 | 1827.2728 | 50.3165  |
| 6.827    | 0.1488      | 202.0844 | 1804.2880 | 49.6835  |
| Sum      |             |          | 3631.5608 | 100.0000 |

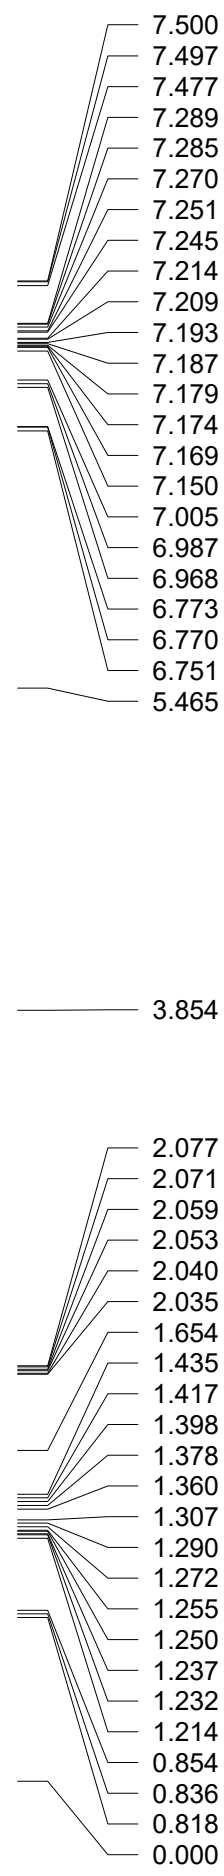

WJ-1-166-H  
Jul 01 2020  
SOLVENT: CDCl3  
NA = 4  
F1 = 400.130005 MHz  
F2 = 1.000000 MHz

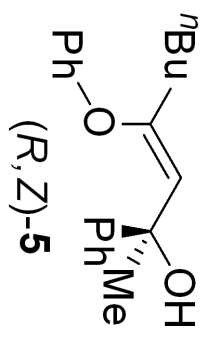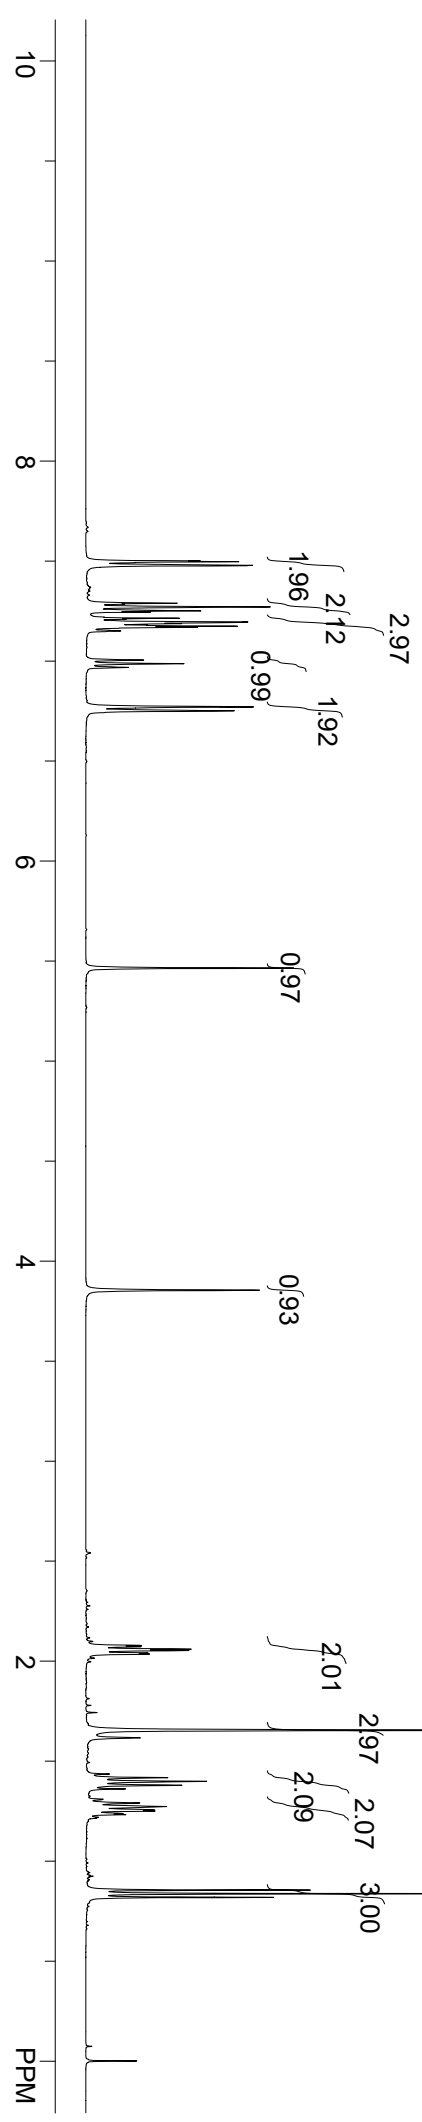

wf-1-166-C  
Jul 01 2020  
SOLVENT: CDCl3  
NA = 180  
F1 = 100.612770 MHz  
F2 = 1.000000 MHz

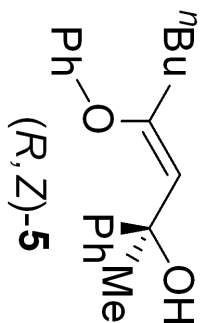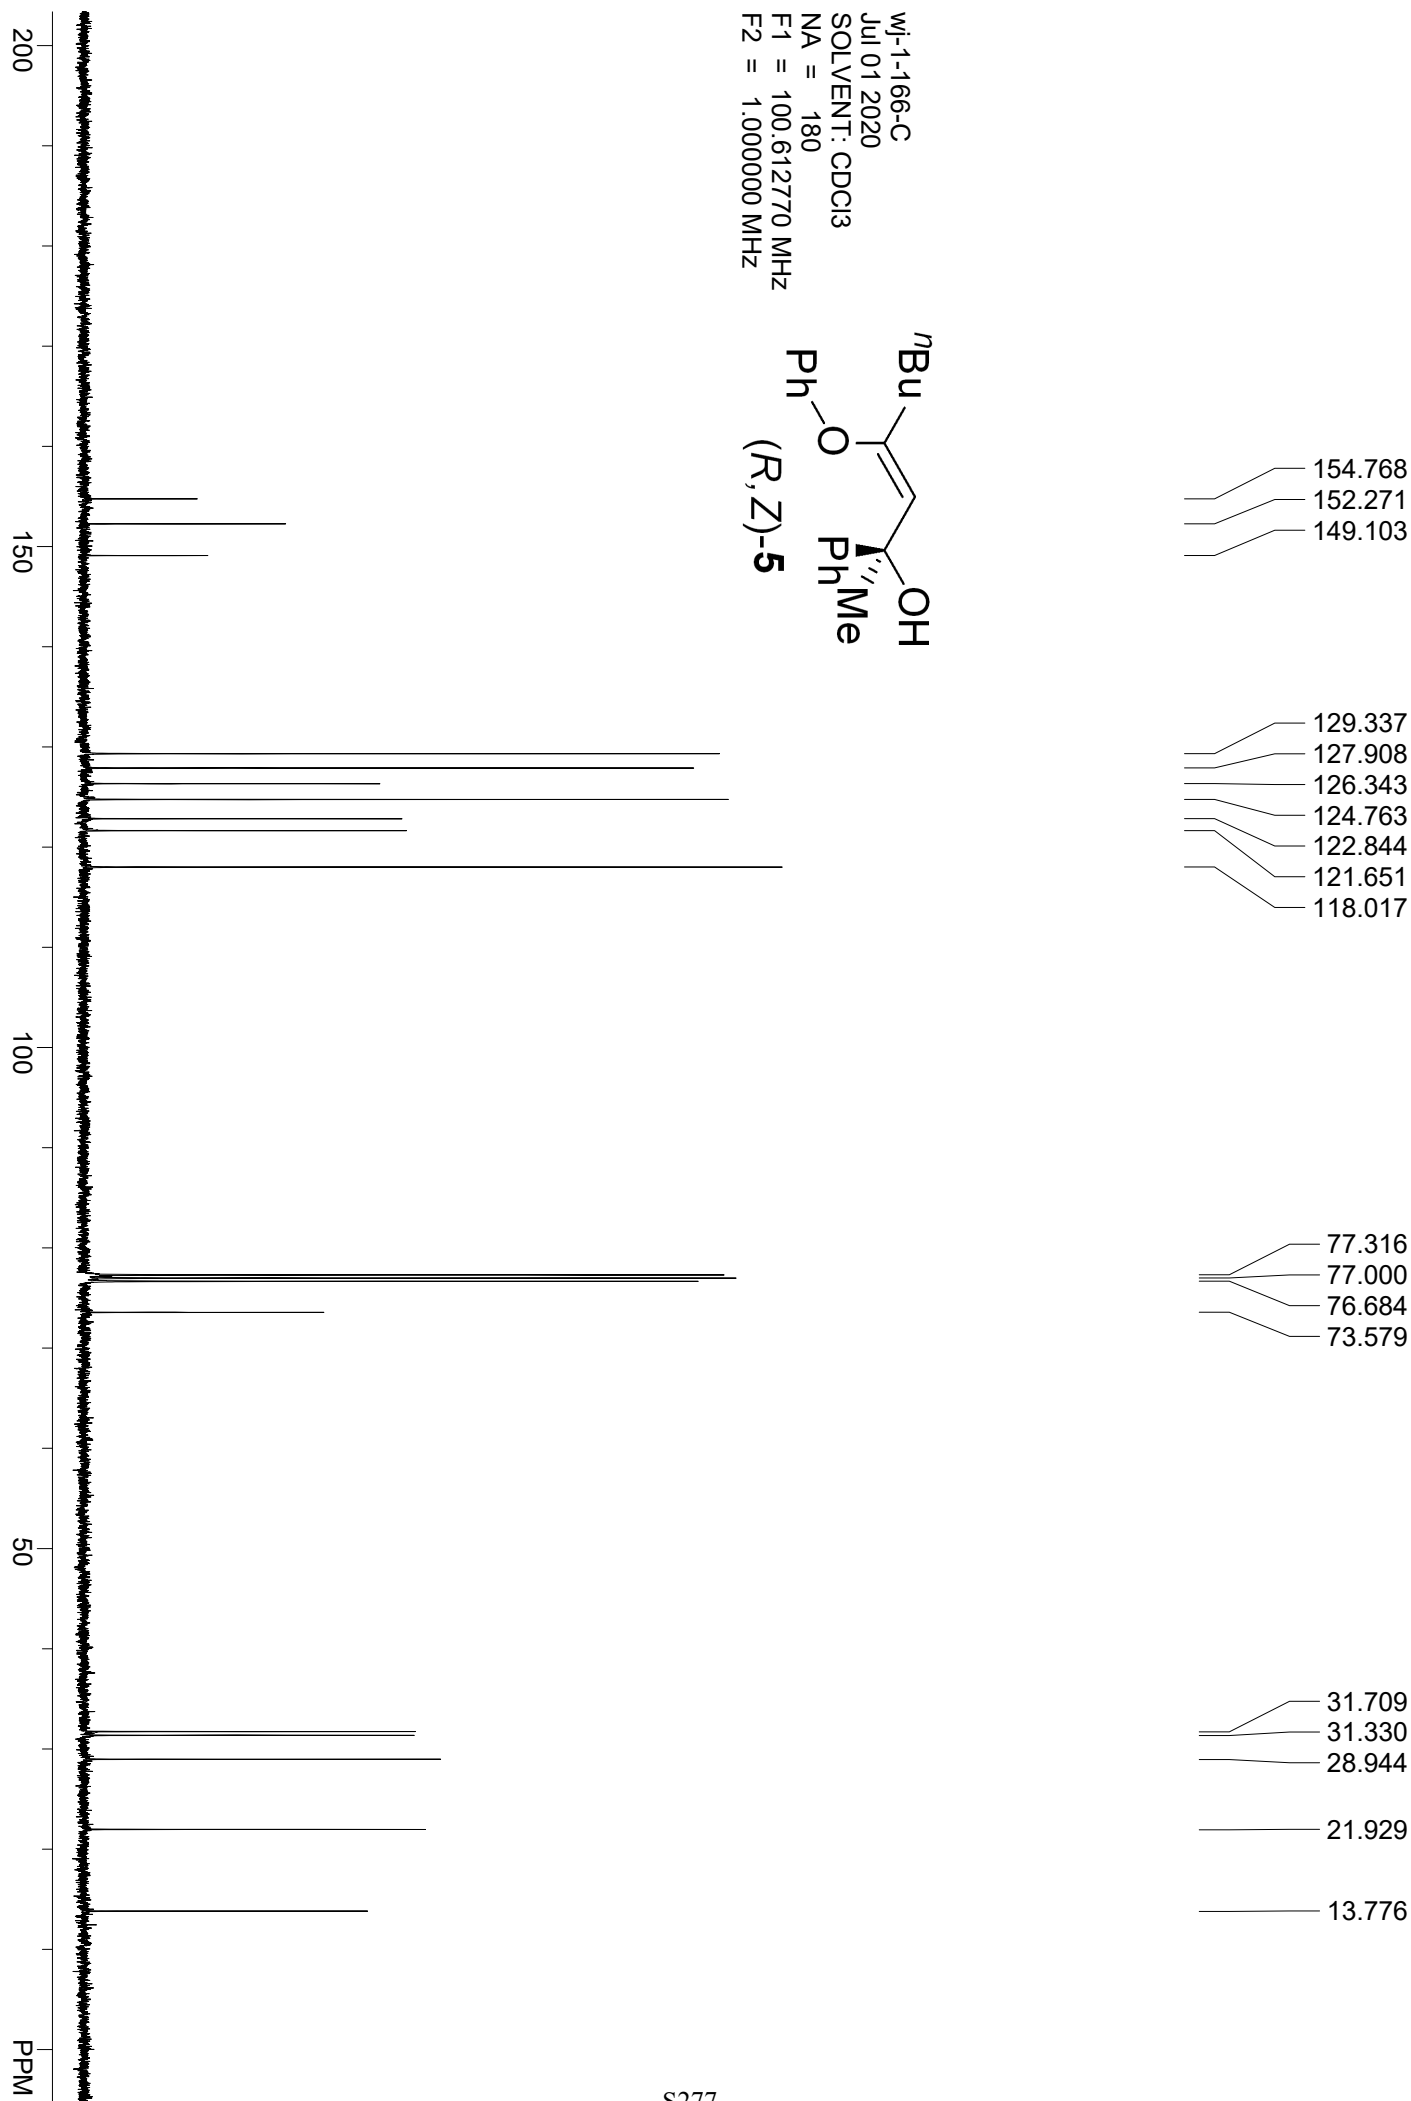

# Area Percent Report



sample wj-1-166-IC-99.5-0.5-0.5-214

Data file: C:\Users\Public\Documents\ChemStation\1\Data\WJ\_LC 2020-07-02 11-33-30\009-P2-C1-wj-1-166.D

## Acquisition Data:

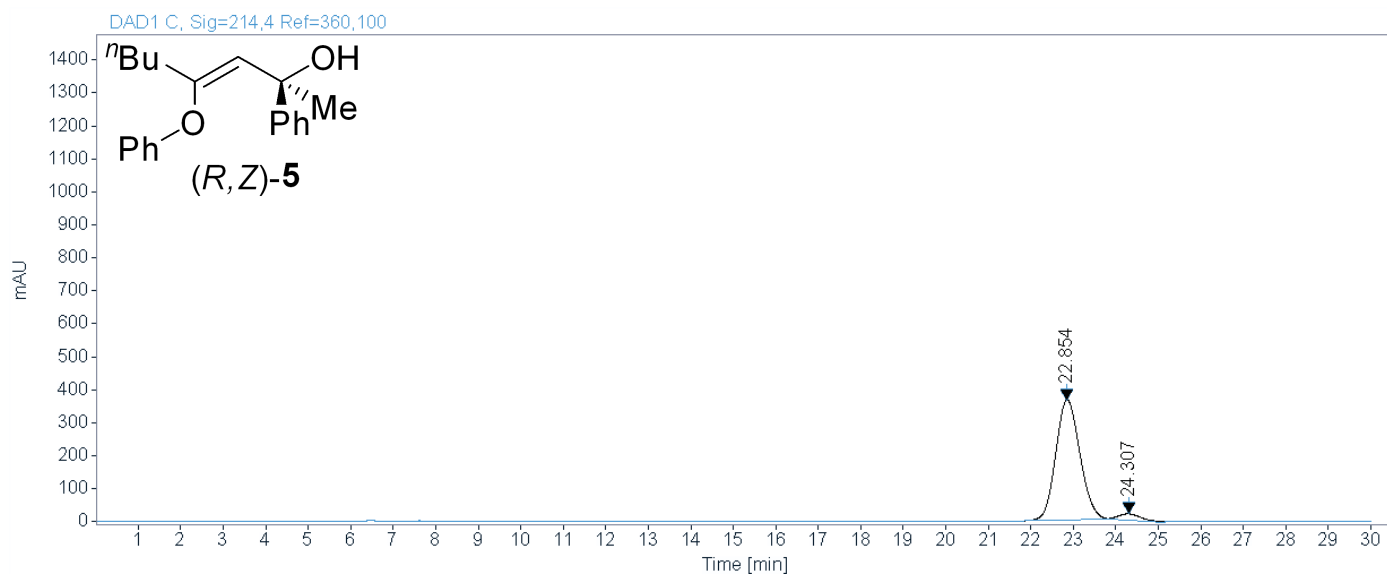

Signal: DAD1 C, Sig=214,4 Ref=360,100

| RT [min] | Width [min] | Height   | Area       | Area%    |
|----------|-------------|----------|------------|----------|
| 22.854   | 0.6605      | 364.1797 | 14432.0059 | 95.5562  |
| 24.307   | 0.5949      | 18.8043  | 671.1620   | 4.4438   |
| Sum      |             |          | 15103.1679 | 100.0000 |

# Area Percent Report



sample wj-1-166-rac-IC-99.5-0.5-0.5-214

Data file: C:\Users\Public\Documents\ChemStation\1\Data\WJ\_LC 2020-07-02 11-33-30\008-P2-C2-wj-1-166-RAC.D

## Acquisition Data:

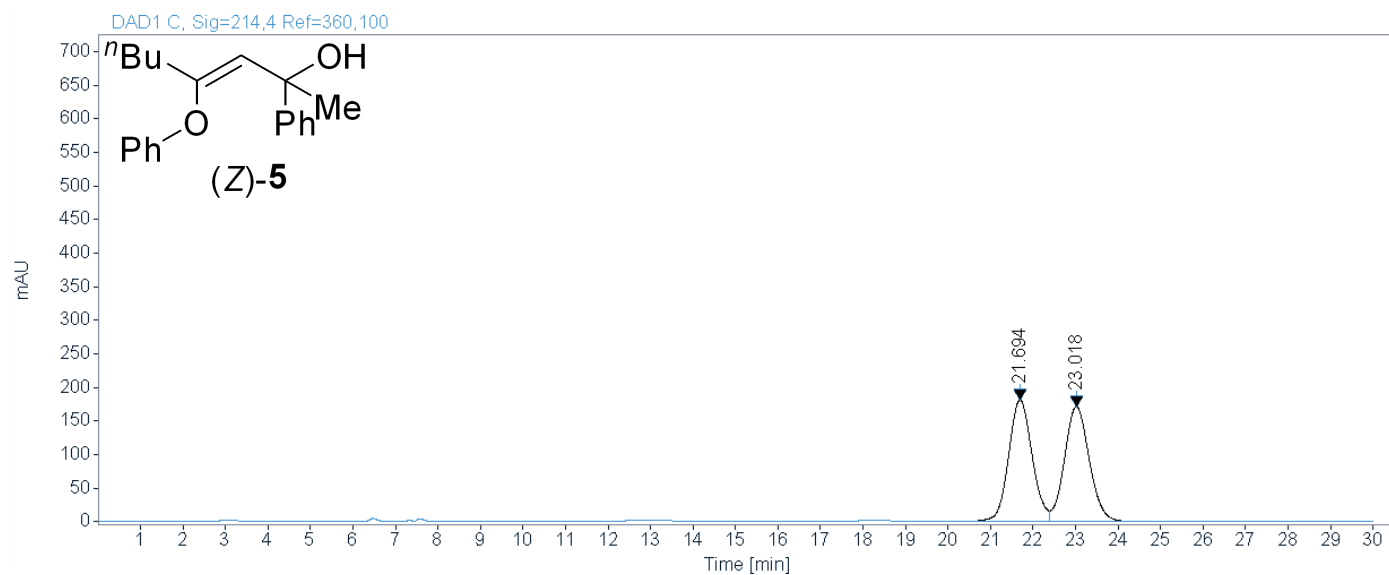

Signal: DAD1 C, Sig=214,4 Ref=360,100

| RT [min] | Width [min] | Height   | Area       | Area%    |
|----------|-------------|----------|------------|----------|
| 21.694   | 0.5962      | 181.2001 | 6961.1162  | 50.0641  |
| 23.018   | 0.6294      | 171.1311 | 6943.2949  | 49.9359  |
| Sum      |             |          | 13904.4111 | 100.0000 |

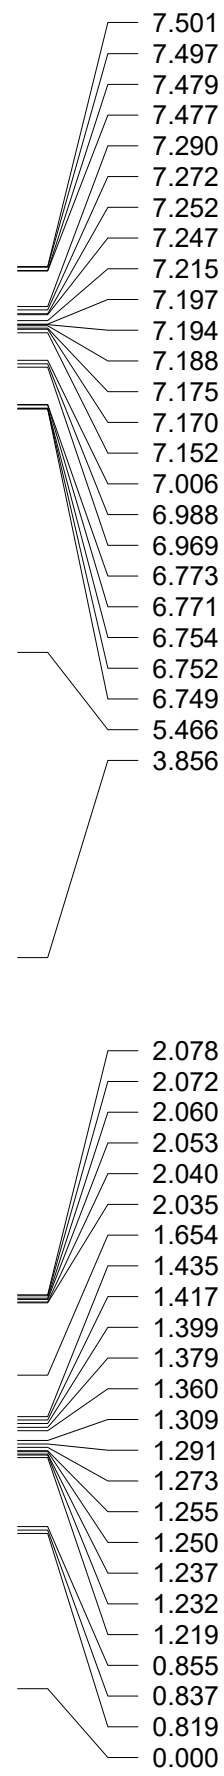

wf-1-156-H  
June 28 2020  
SOLVENT: CDCl3  
NA = 4  
F1 = 400.130005 MHz  
F2 = 1.000000 MHz

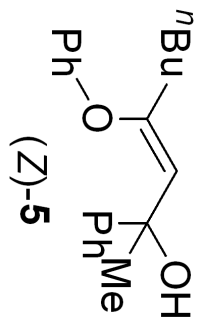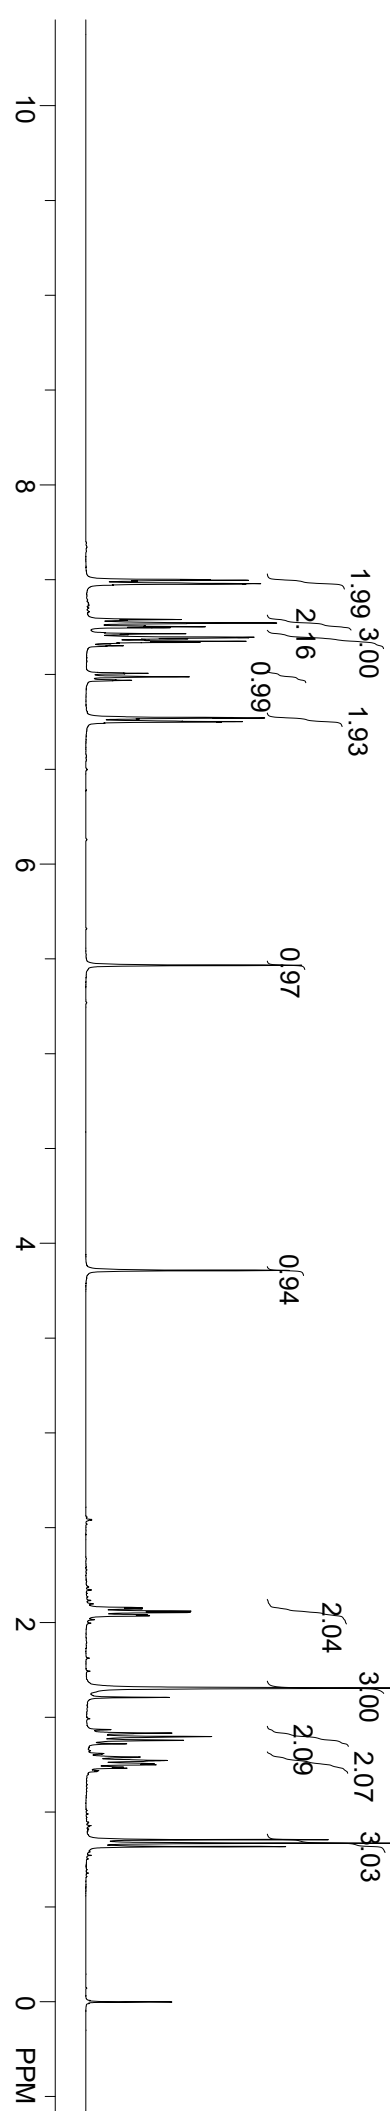



wj-1-156-C  
June 26 2020  
SOLVENT: CDCl3  
NA = 300  
F1 = 100.612770 MHz  
F2 = 1.000000 MHz

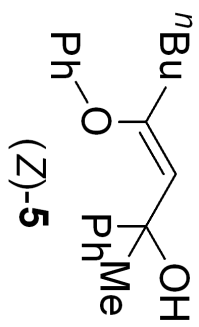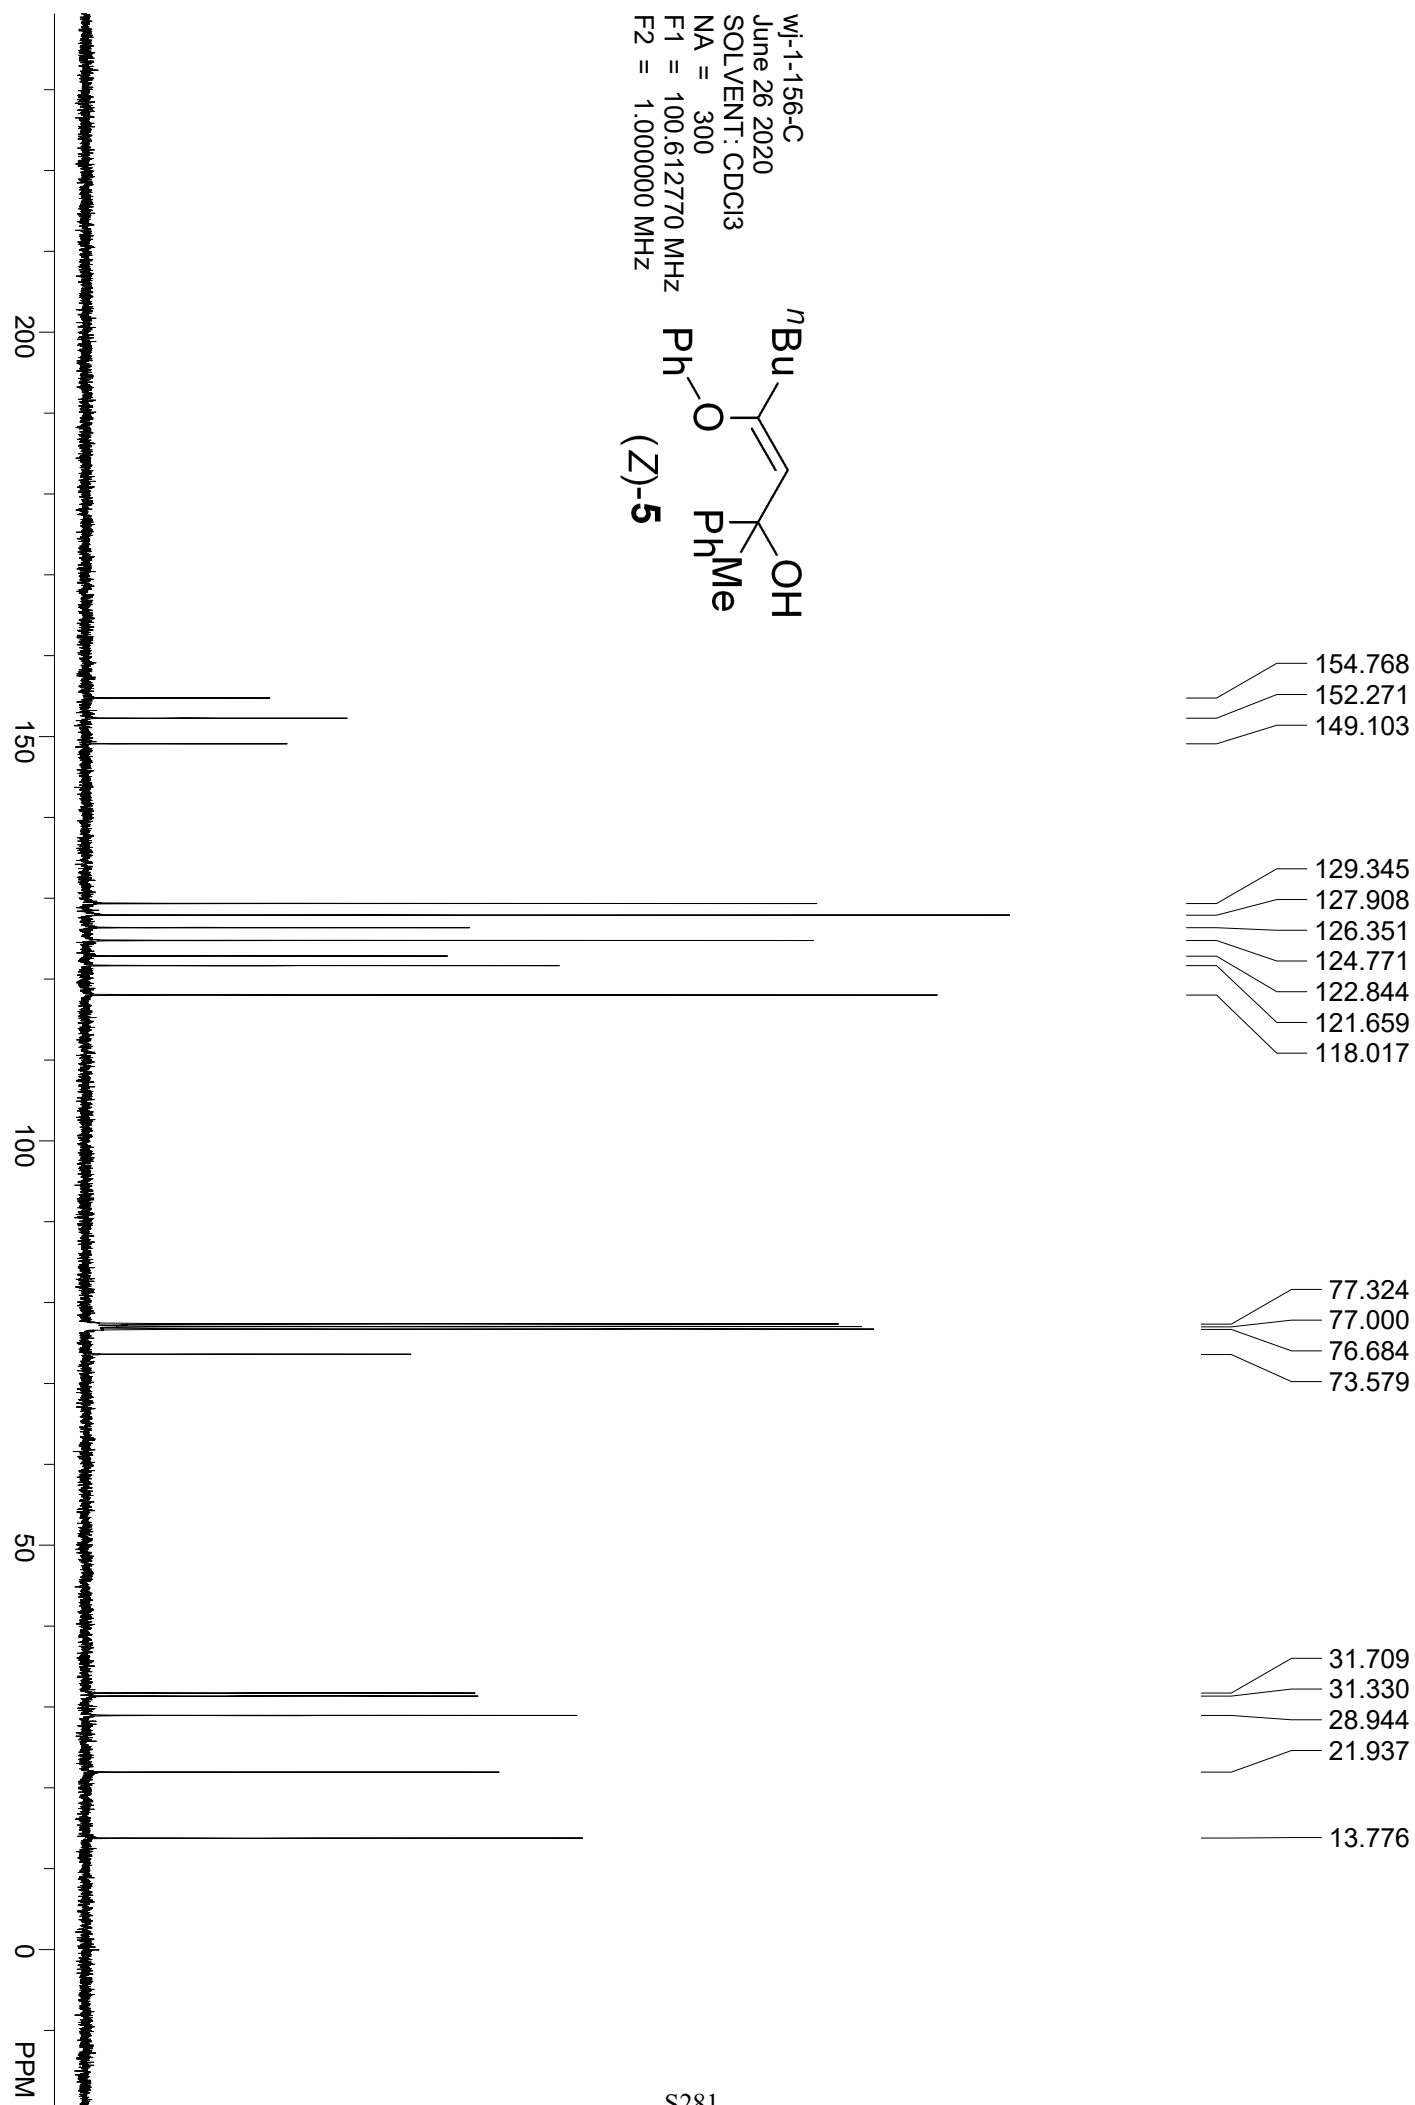

wf-2-193-H  
Jan 29 2021  
SOLVENT: CDCl3  
NA = 4  
F1 = 400.130005 MHz  
F2 = 1.000000 MHz

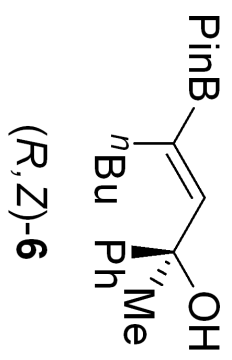

- 7.496
- 7.477
- 7.323
- 7.304
- 7.285
- 7.259
- 7.229
- 7.211
- 7.193
- 6.665

- 2.058
- 2.039
- 2.021
- 1.956
- 1.674
- 1.257
- 1.126
- 1.104
- 1.086
- 1.069
- 1.051
- 1.034
- 1.018
- 0.998
- 0.732
- 0.715
- 0.697
- 0.000

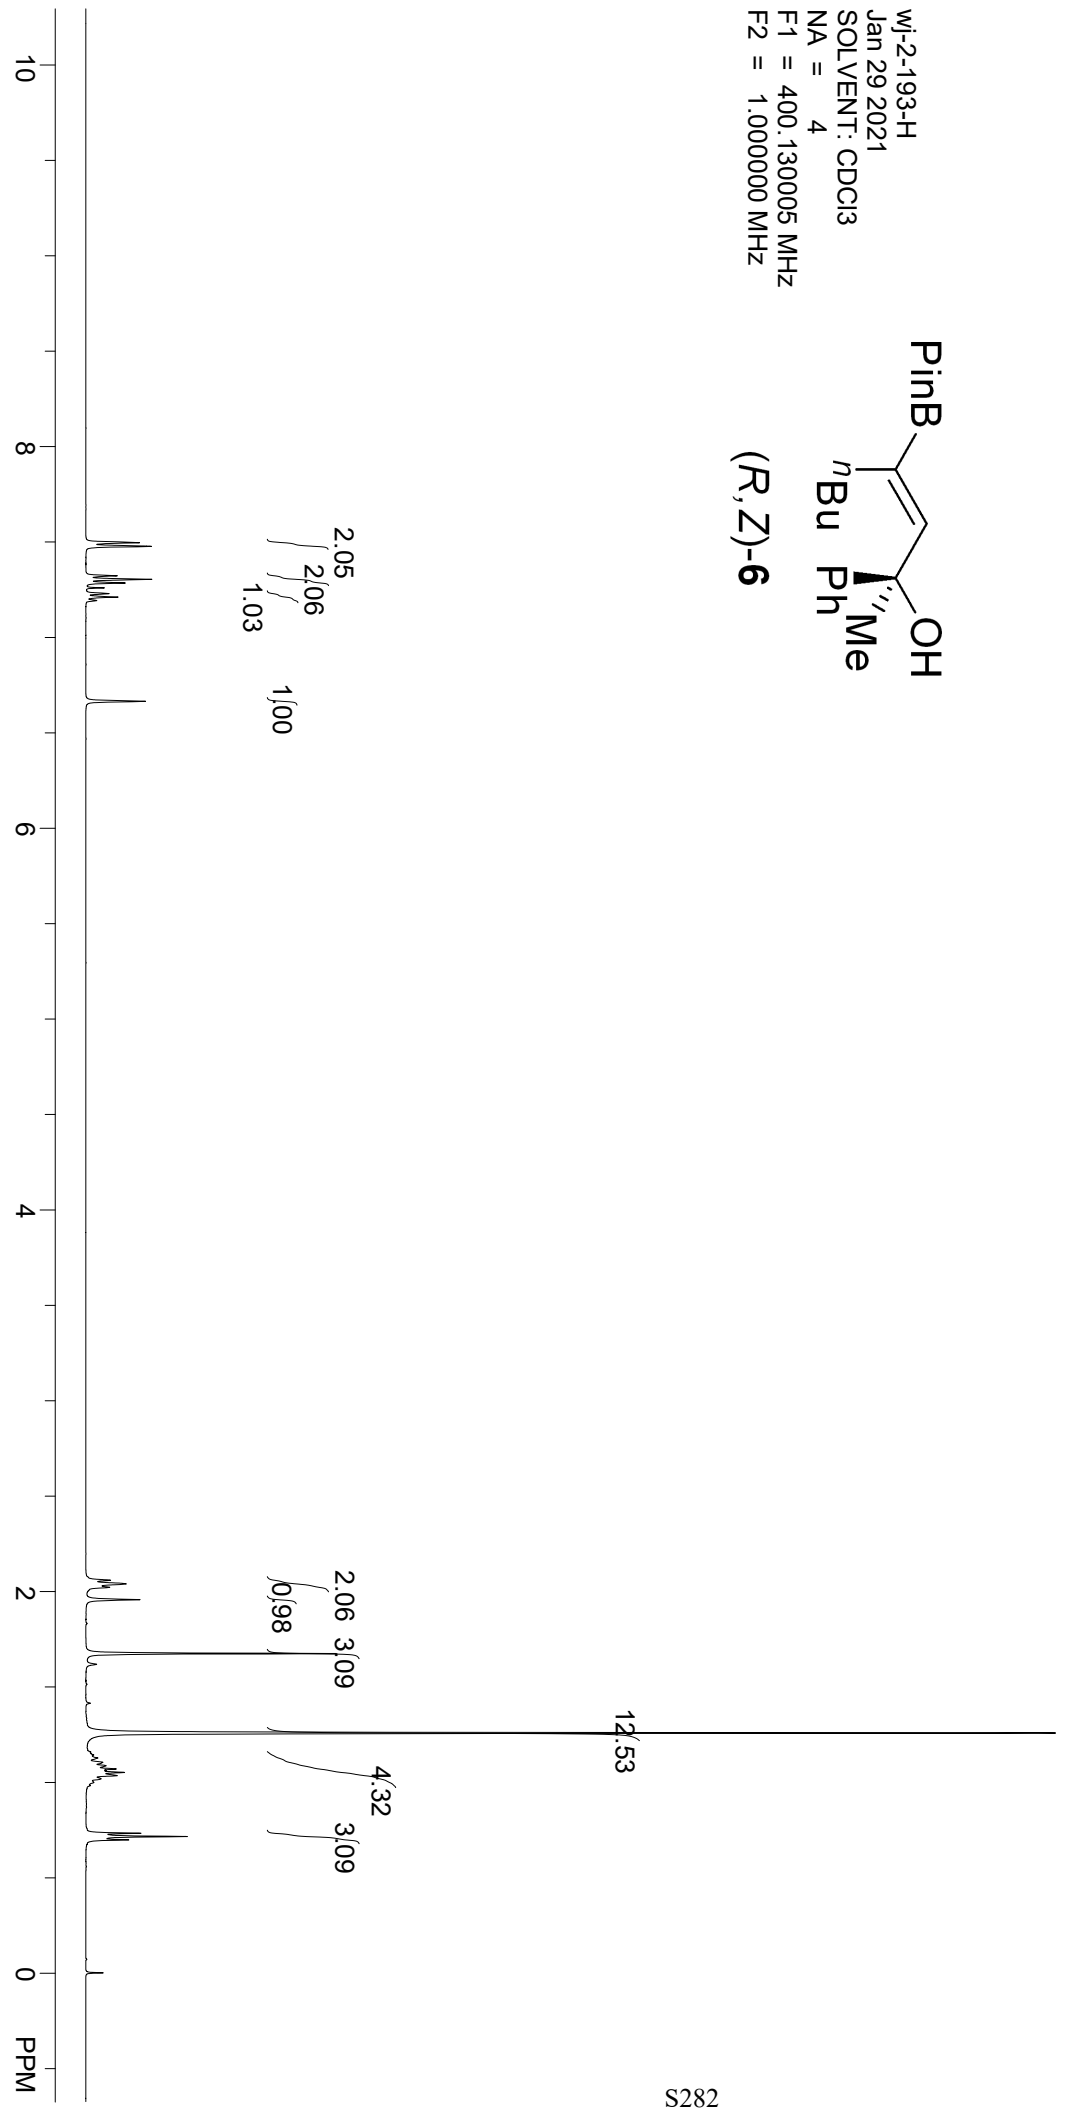

wj-2-193-C  
Jan 29 2021  
SOLVENT: CDCl3  
NA = 120  
F1 = 100.612770 MHz  
F2 = 1.000000 MHz

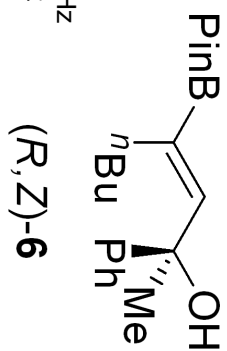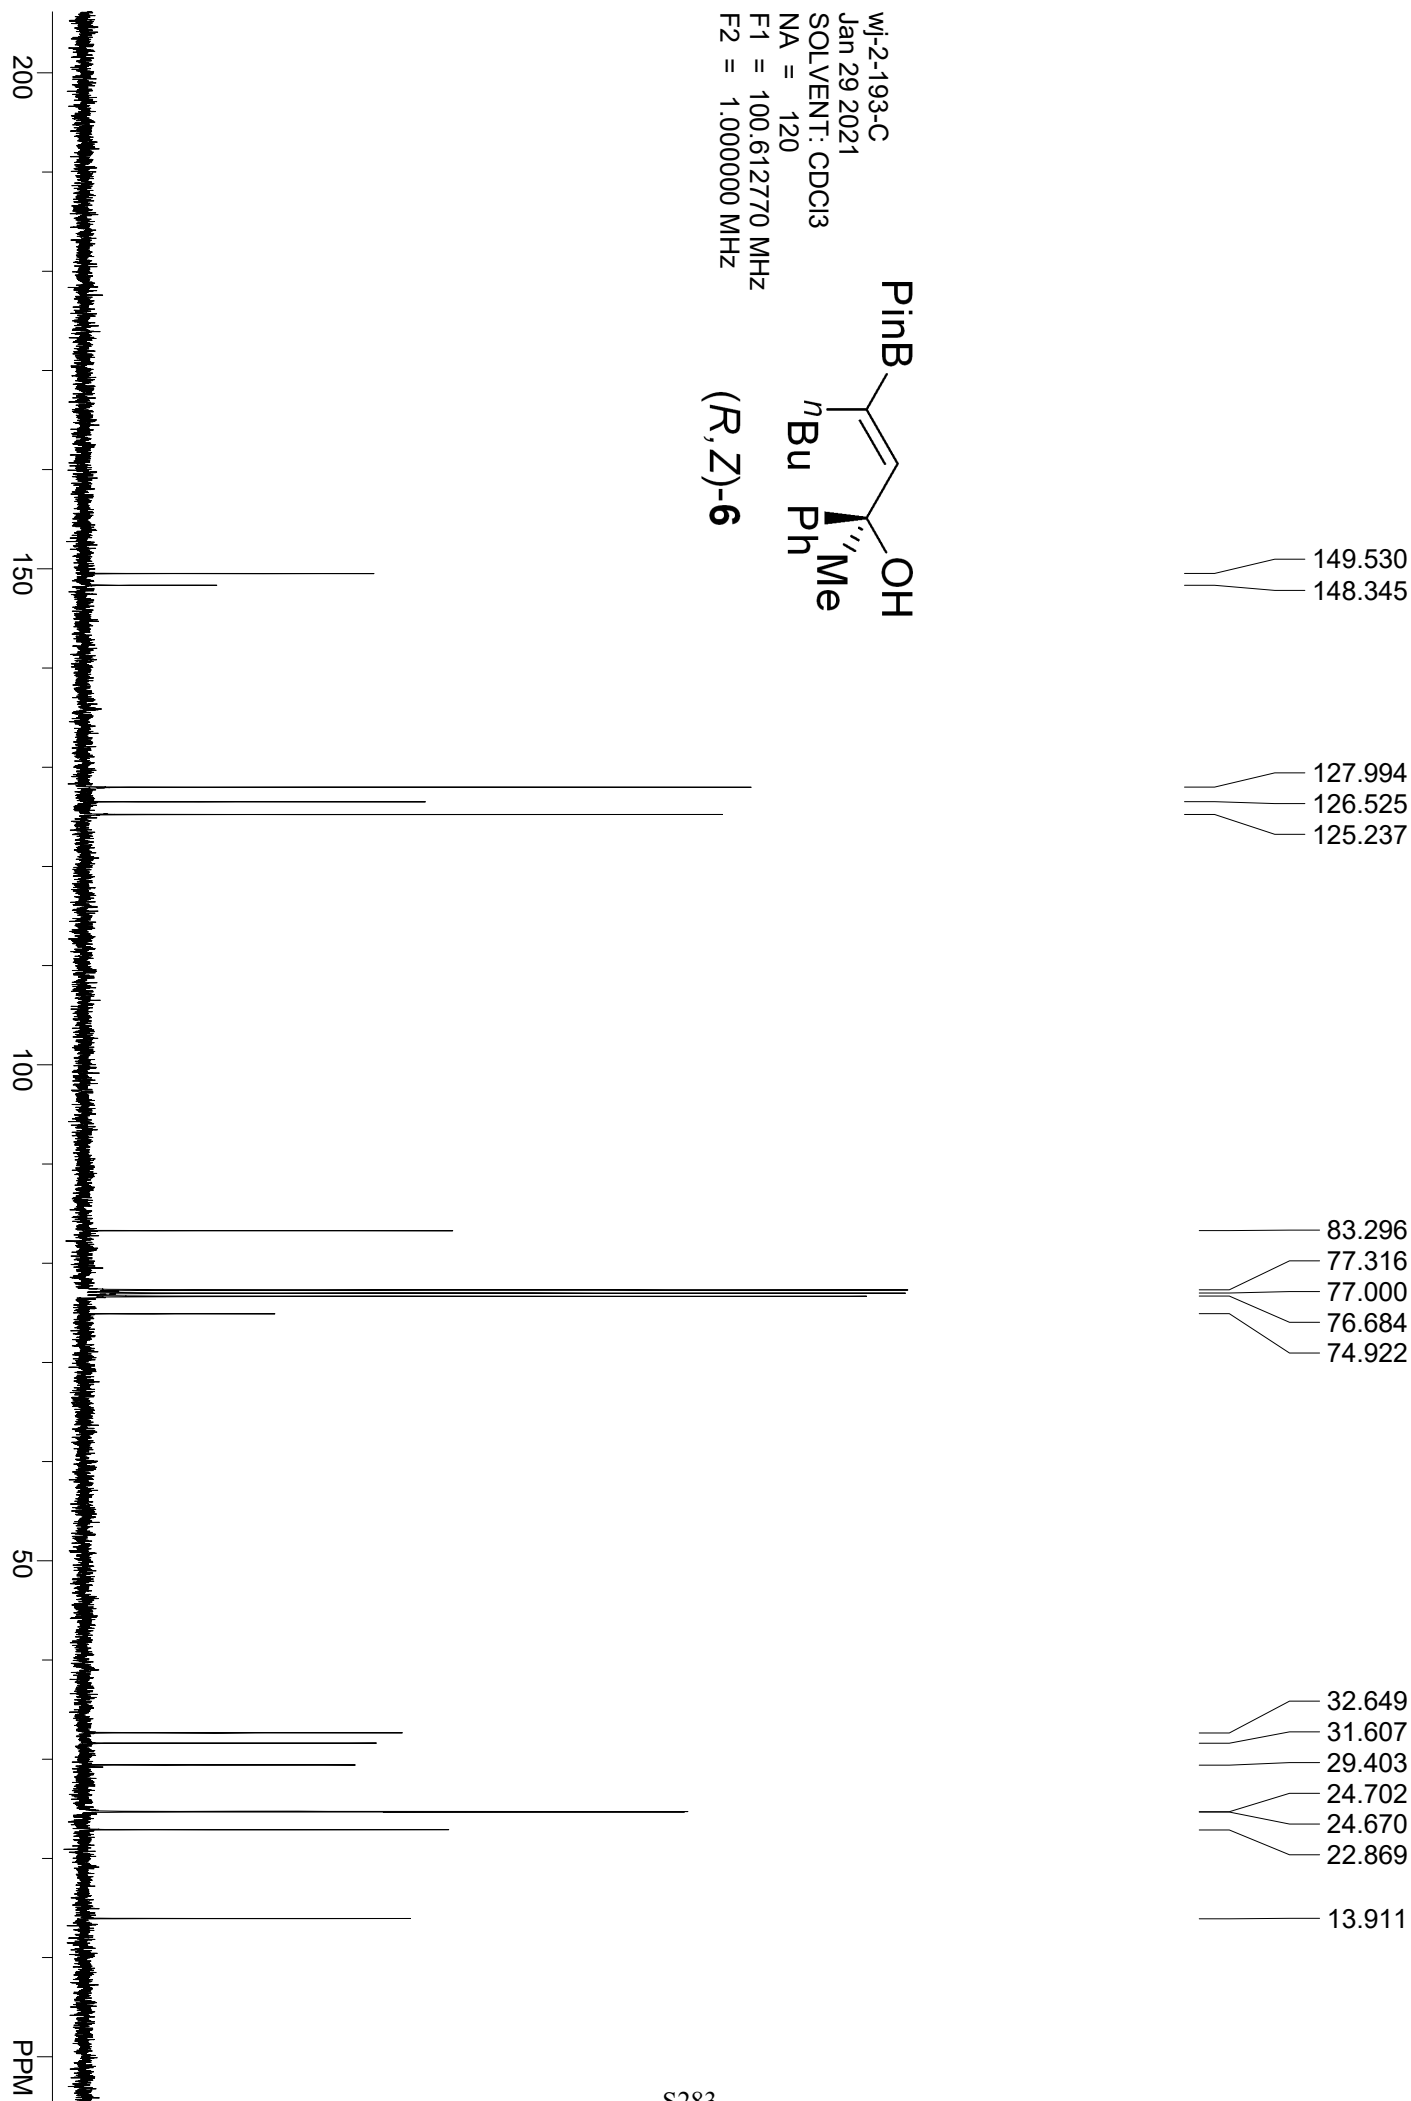

# Area Percent Report



Agilent Technologies

sample wj-2-193-AD-H-98-2-1.0-214

Data file: C:\Users\Public\Documents\ChemStation\1\Data\WJ\_LC 2021-01-29 15-35-00\005-P2-C3-wj-2-193.D

## Acquisition Data:

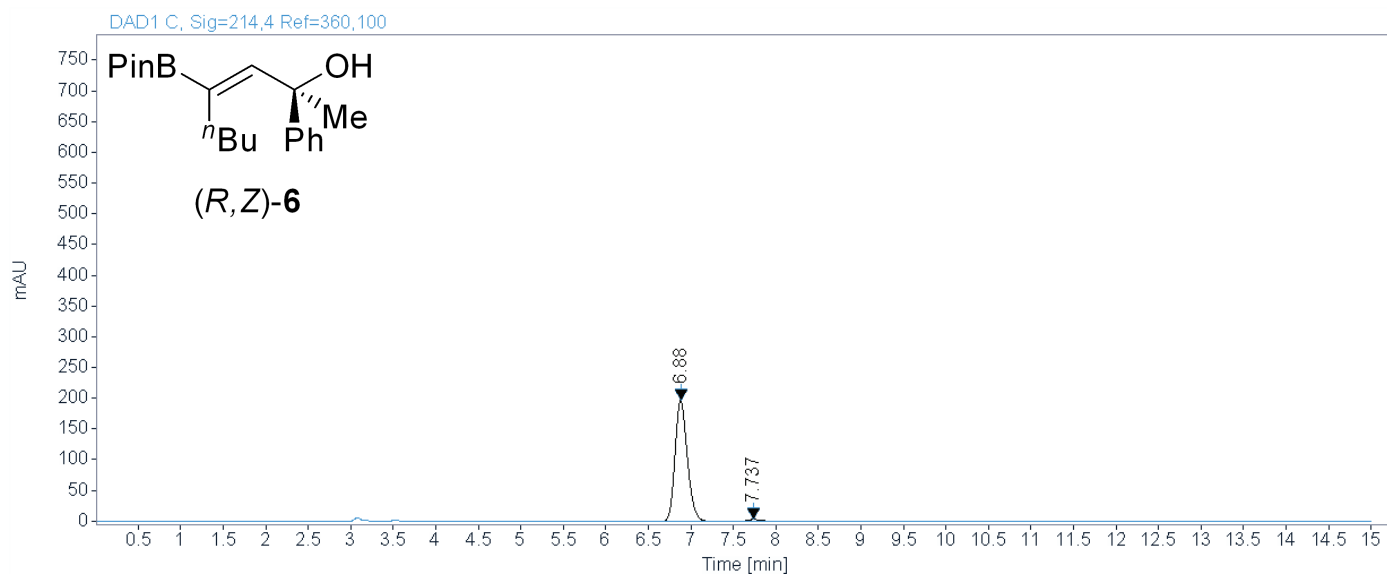

Signal: DAD1 C, Sig=214,4 Ref=360,100

| RT [min] | Width [min] | Height   | Area      | Area%    |
|----------|-------------|----------|-----------|----------|
| 6.880    | 0.1676      | 197.8443 | 1989.7397 | 98.0664  |
| 7.737    | 0.2023      | 3.2314   | 39.2322   | 1.9336   |
| Sum      |             |          | 2028.9720 | 100.0000 |

# Area Percent Report



Agilent Technologies

sample wj-2-193-rac-AD-H-98-2-1.0-214

Data file: C:\Users\Public\Documents\ChemStation\1\Data\WJ\_LC 2021-01-29 15-35-00\006-P2-C4-wj-2-193-rac.D

## Acquisition Data:

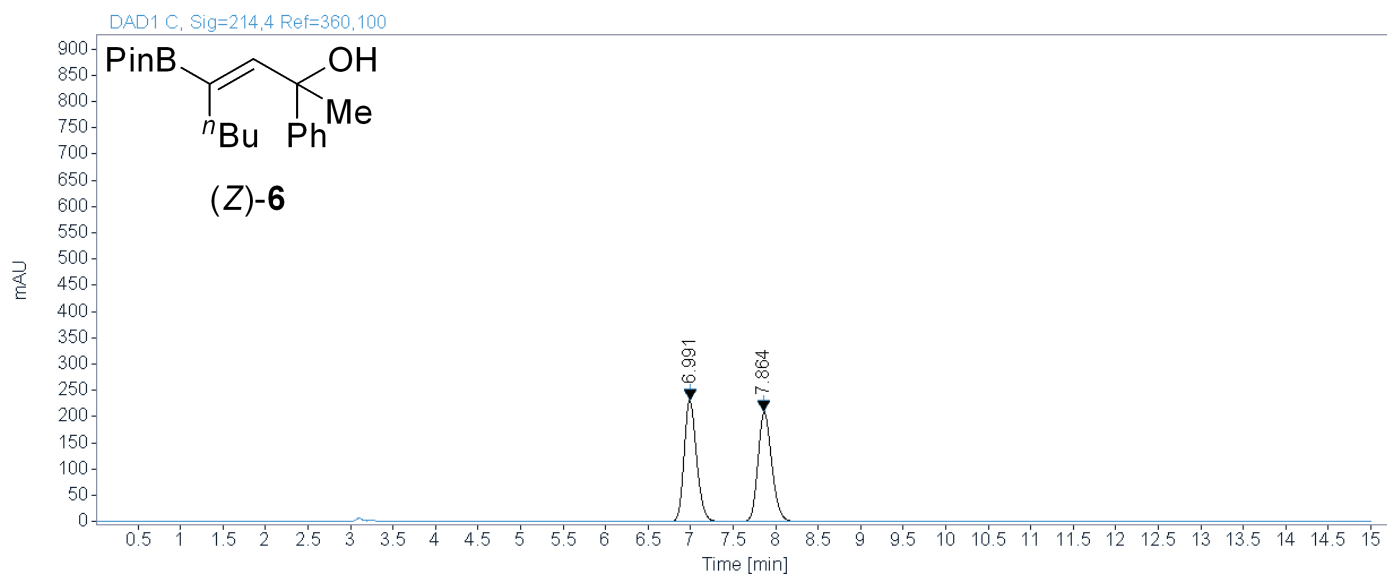

Signal: DAD1 C, Sig=214,4 Ref=360,100

| RT [min] | Width [min] | Height   | Area      | Area%    |
|----------|-------------|----------|-----------|----------|
| 6.991    | 0.1566      | 231.5414 | 2353.2109 | 49.9057  |
| 7.864    | 0.1763      | 208.3642 | 2362.1013 | 50.0943  |
|          | Sum         |          | 4715.3123 | 100.0000 |

wf-2-176-H  
Jan 20 2021  
SOLVENT: CDCl3  
NA = 4  
F1 = 400.130005 MHz  
F2 = 1.000000 MHz

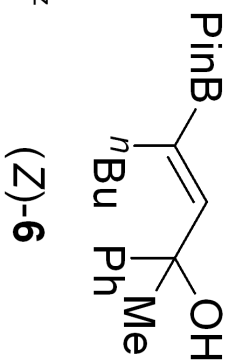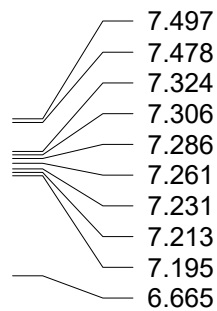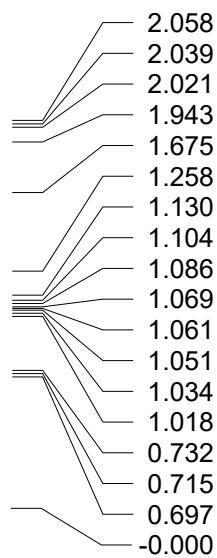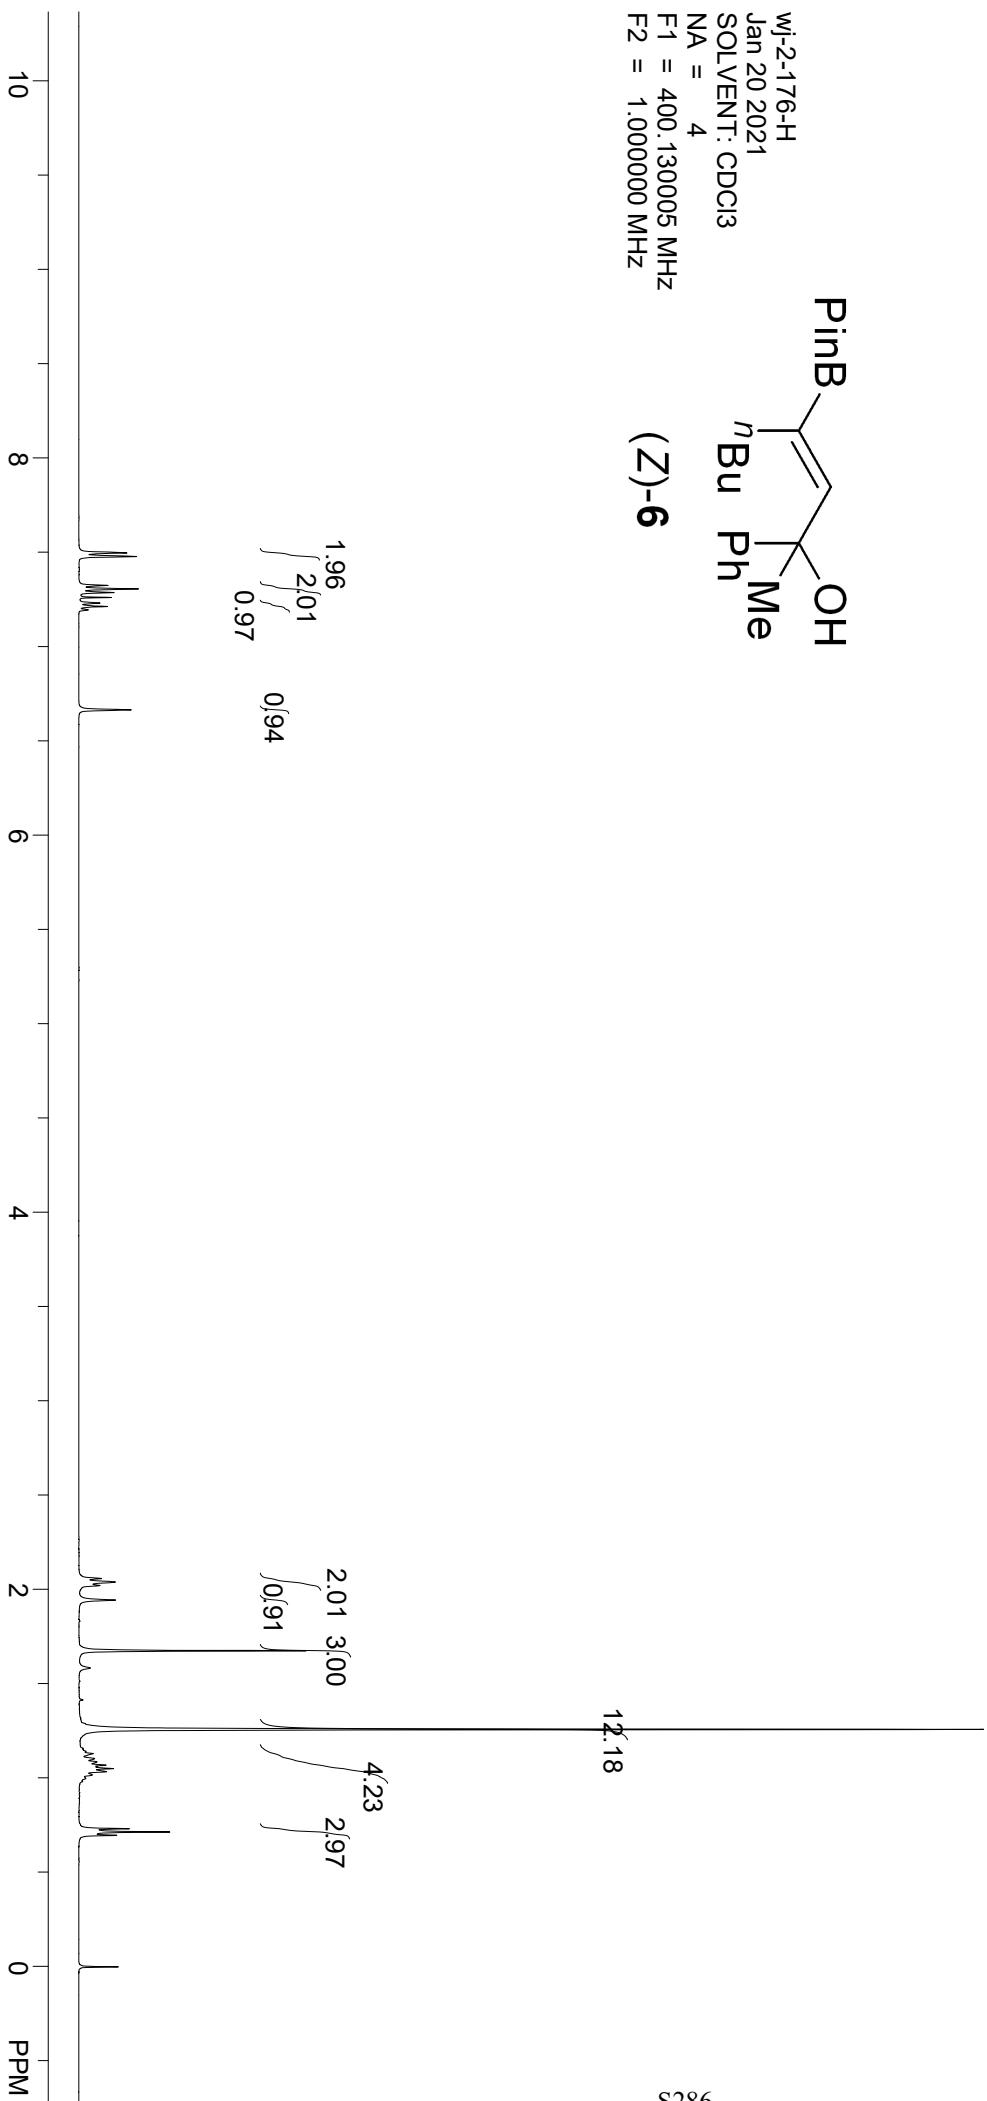

wj-2-176-C  
Jan 20 2021  
SOLVENT: CDCl3  
NA = 111  
F1 = 100.612770 MHz  
F2 = 1.000000 MHz

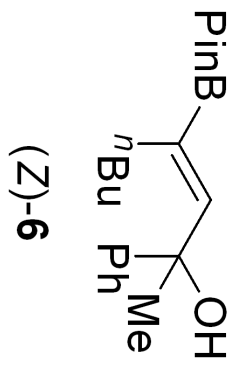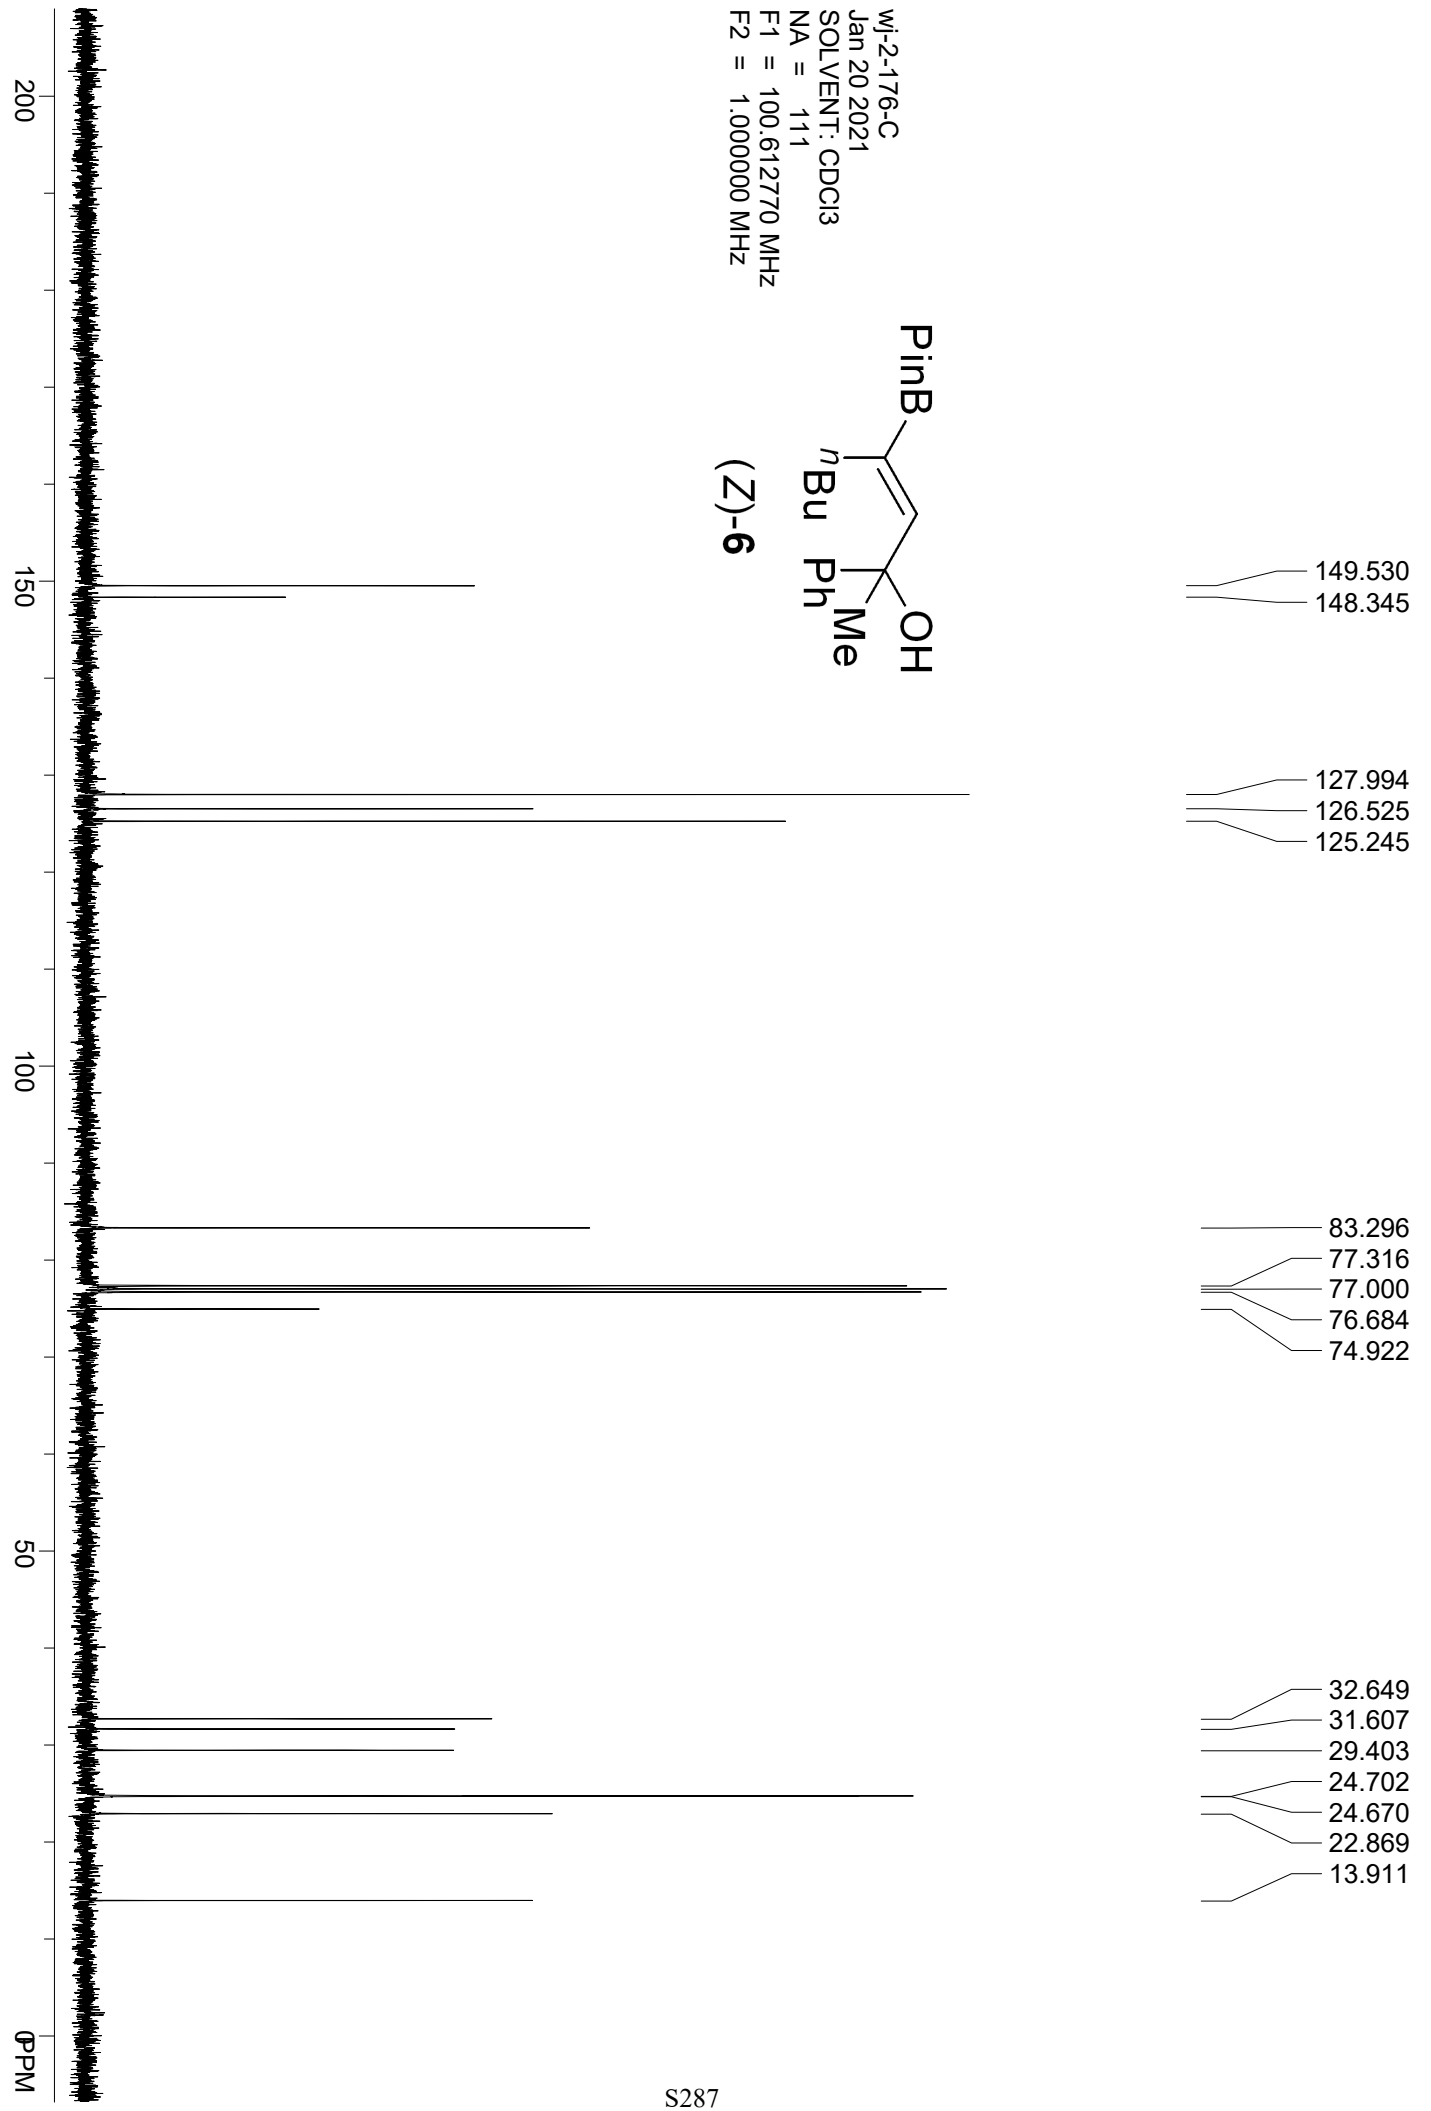

wf-2-131-H  
Nov 06 2020  
SOLVENT: CDCl3  
NA = 4  
F1 = 400.130005 MHz  
F2 = 1.000000 MHz

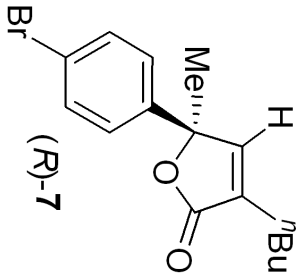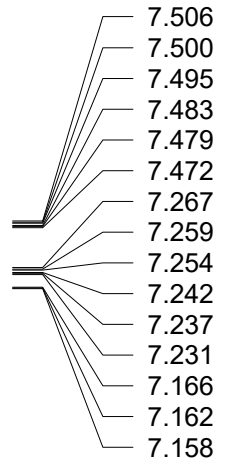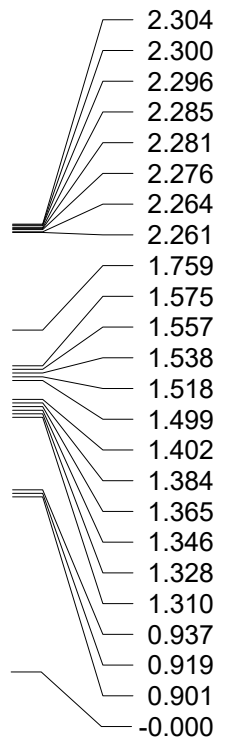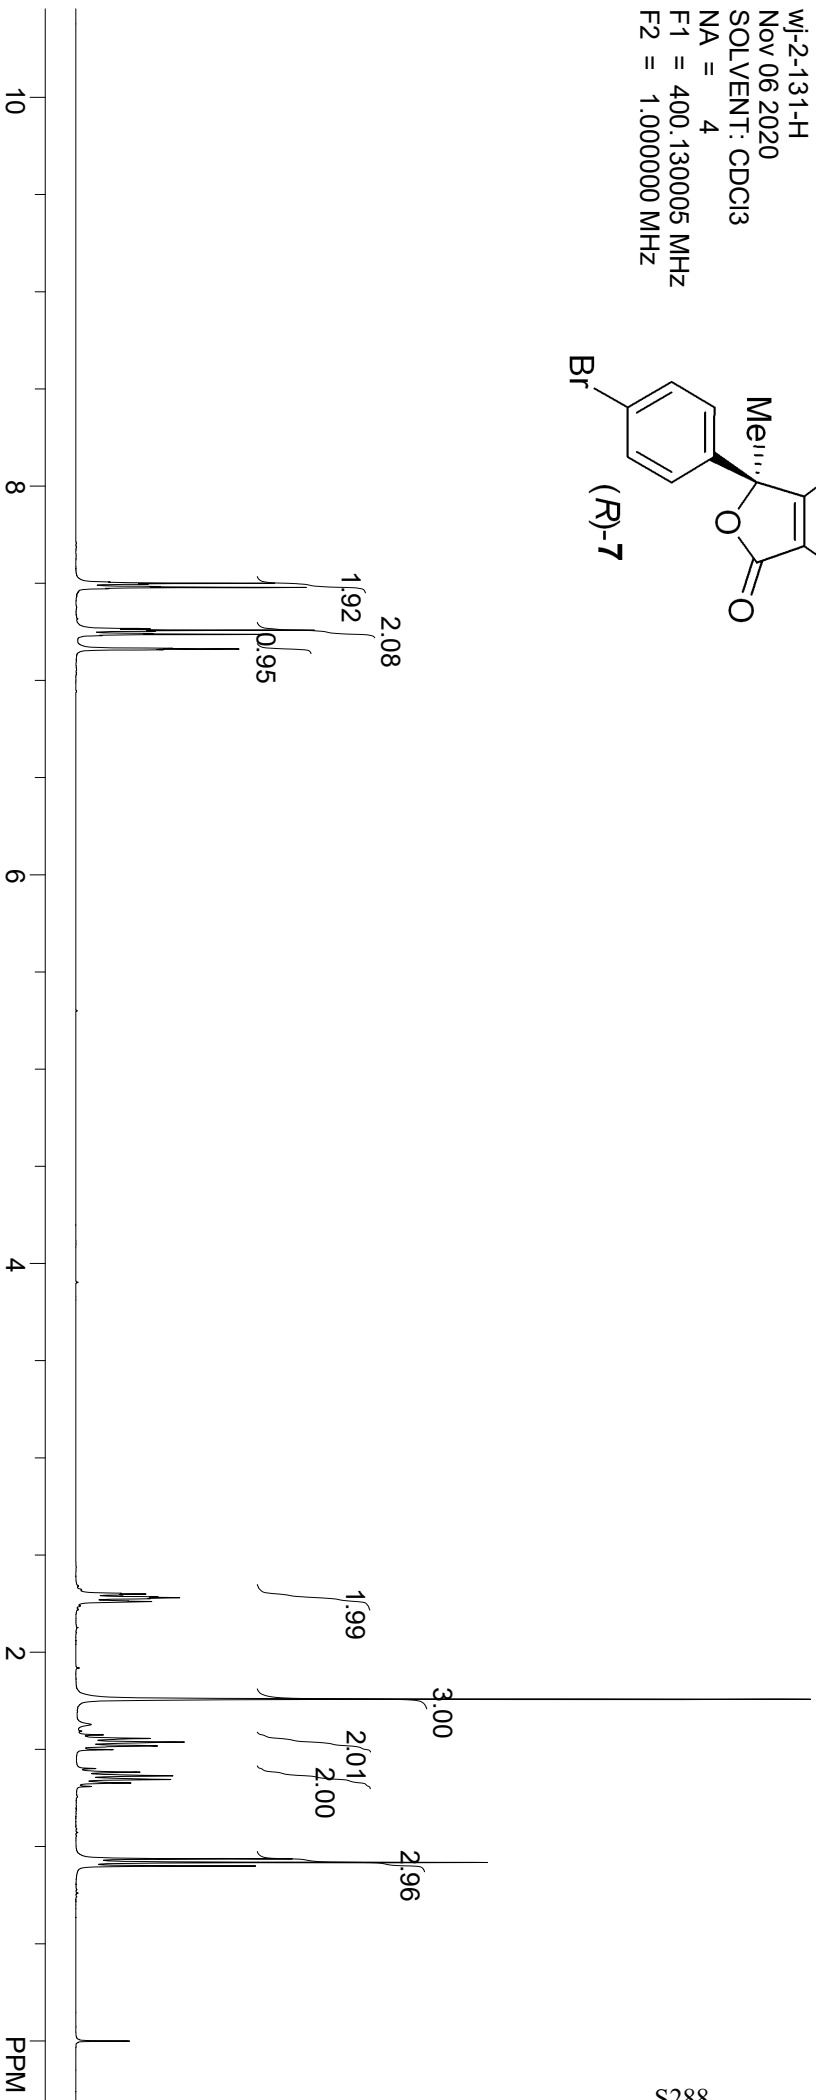



wj-2-131-C  
Nov 06 2020  
SOLVENT: CDCl3  
NA = 300  
F1 = 100.612770 MHz  
F2 = 1.000000 MHz

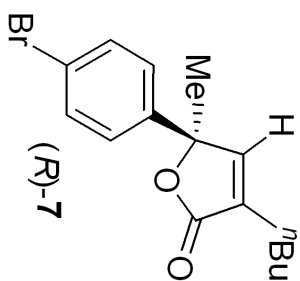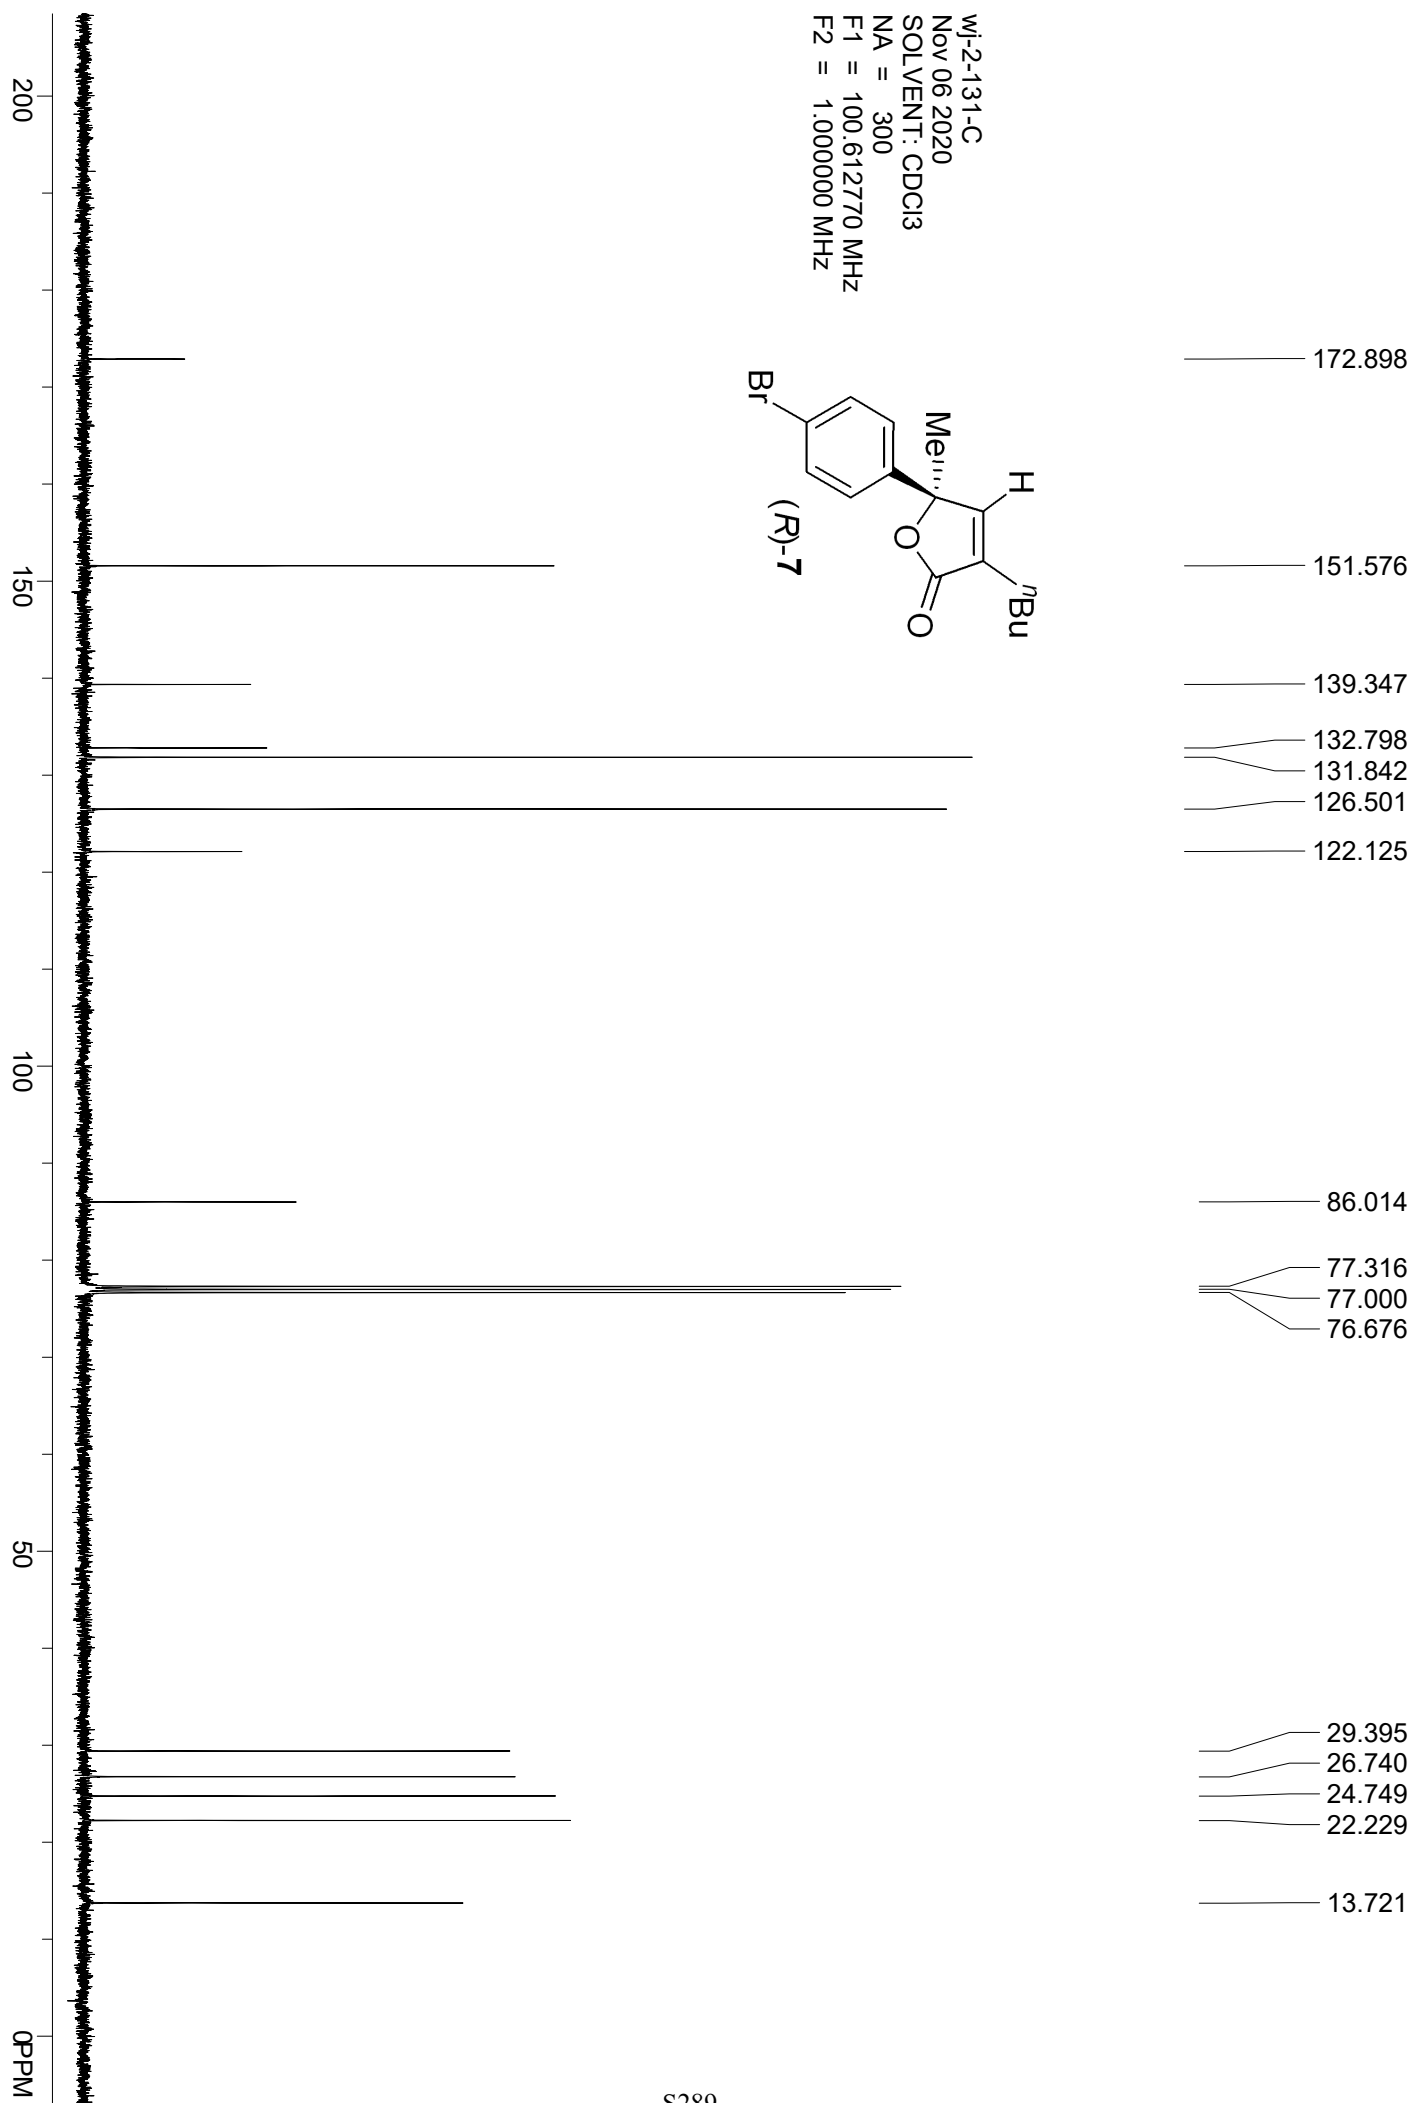

# Area Percent Report



Agilent Technologies

sample wj-2-131-OD-H-99.5-0.5-1.0-214

Data file: C:\Users\Public\Documents\ChemStation\1\Data\zhangq 2020-11-06 15-59-05\015-P2-C3-wj-2-131.D

## Acquisition Data:

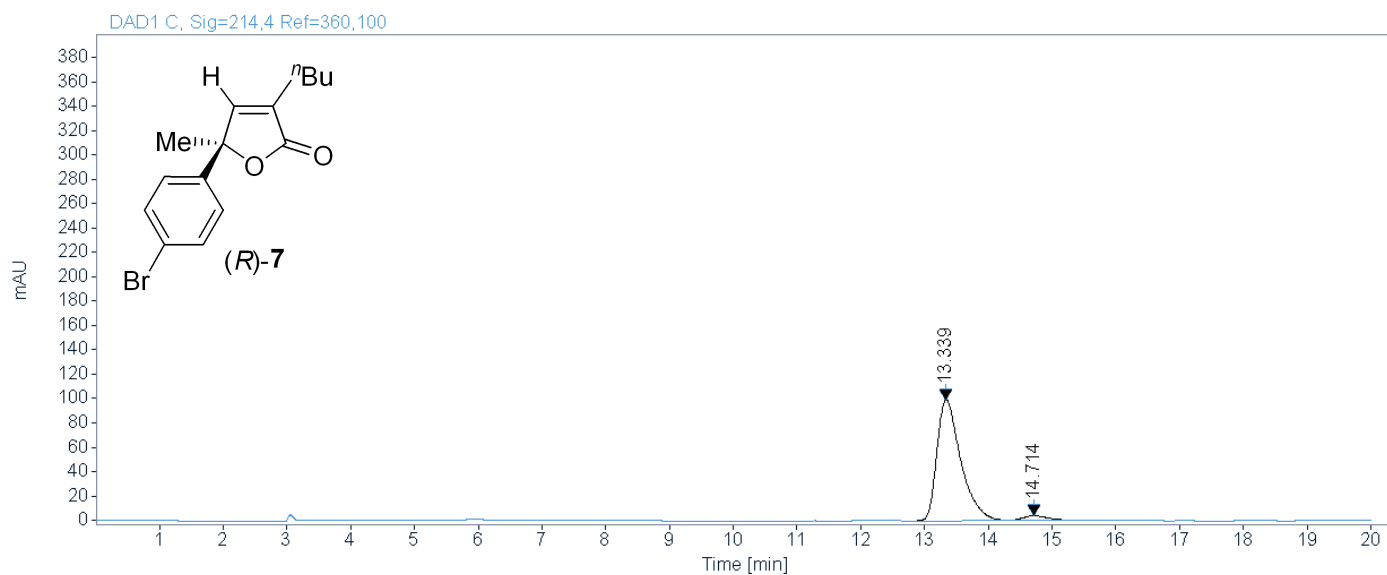

Signal: DAD1 C, Sig=214,4 Ref=360,100

| RT [min] | Width [min] | Height  | Area      | Area%    |
|----------|-------------|---------|-----------|----------|
| 13.339   | 0.3901      | 99.1396 | 2567.5222 | 96.3754  |
| 14.714   | 0.4001      | 3.6568  | 96.5632   | 3.6246   |
| Sum      |             |         | 2664.0854 | 100.0000 |

# Area Percent Report



Agilent Technologies

sample wj-2-131-rac-OD-H-99.5-0.5-1.0-214

Data file: C:\Users\Public\Documents\ChemStation\1\Data\zhangq 2020-11-06 15-59-05\014-P2-C4-wj-2-131-rac.D

## Acquisition Data:

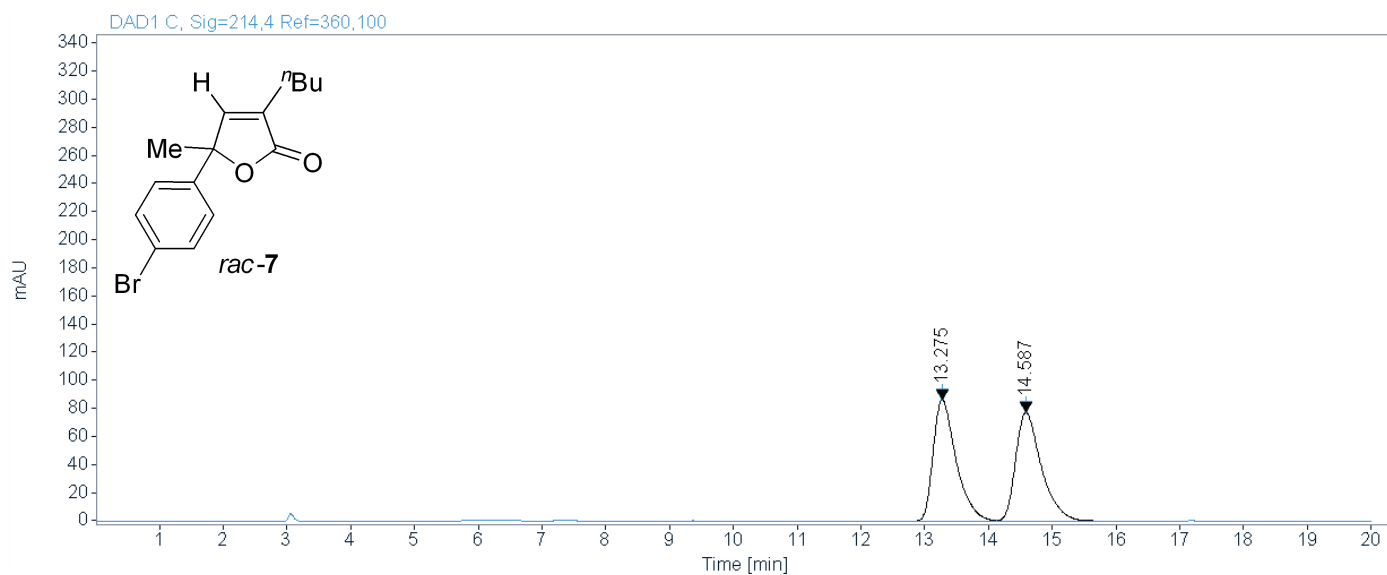

Signal: DAD1 C, Sig=214,4 Ref=360,100

| RT [min] | Width [min] | Height  | Area      | Area%    |
|----------|-------------|---------|-----------|----------|
| 13.275   | 0.3792      | 86.3742 | 2170.4182 | 49.7857  |
| 14.587   | 0.4275      | 77.5067 | 2189.1057 | 50.2143  |
| Sum      |             |         | 4359.5239 | 100.0000 |

- 7.507
- 7.500
- 7.495
- 7.484
- 7.479
- 7.472
- 7.267
- 7.259
- 7.254
- 7.242
- 7.237
- 7.231
- 7.167
- 7.163
- 7.159

- 2.304
- 2.300
- 2.296
- 2.286
- 2.281
- 2.276
- 2.265
- 2.262
- 2.258
- 1.759
- 1.576
- 1.557
- 1.539
- 1.518
- 1.513
- 1.499
- 1.402
- 1.384
- 1.365
- 1.346
- 1.328
- 1.310
- 0.937
- 0.919
- 0.901
- 0.000

wf-2-130-H  
 Nov 06 2020  
 SOLVENT: CDCl3  
 NA = 4  
 F1 = 400.130005 MHz  
 F2 = 1.000000 MHz

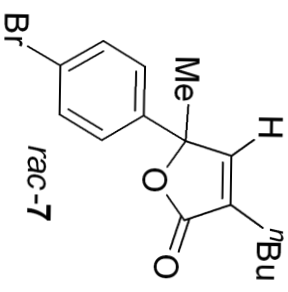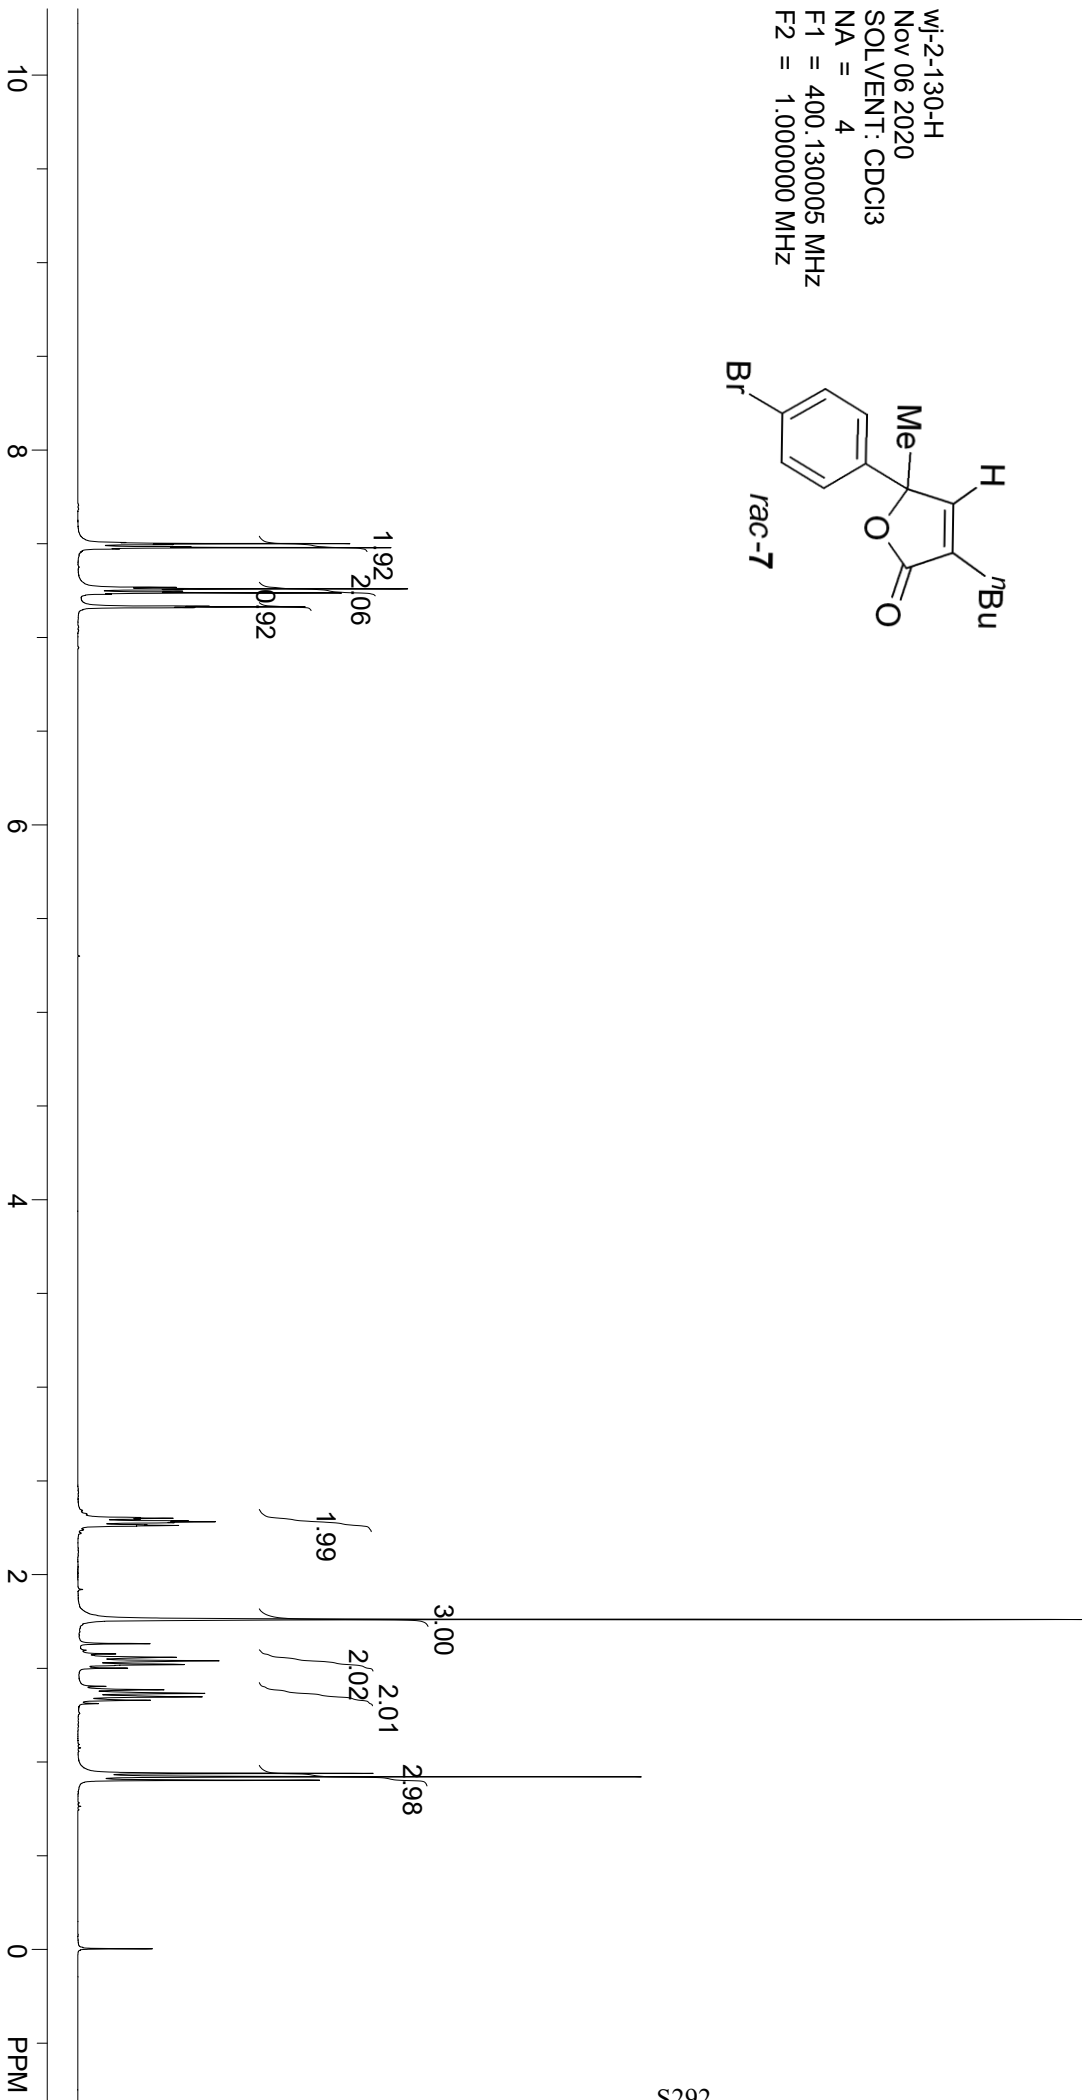

wj-2-130-C  
Nov 06 2020  
SOLVENT: CDCl3  
NA = 300  
F1 = 100.612770 MHz  
F2 = 1.000000 MHz

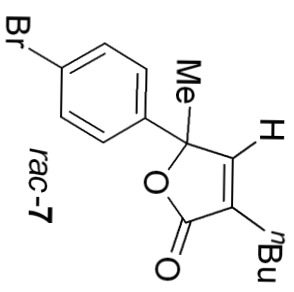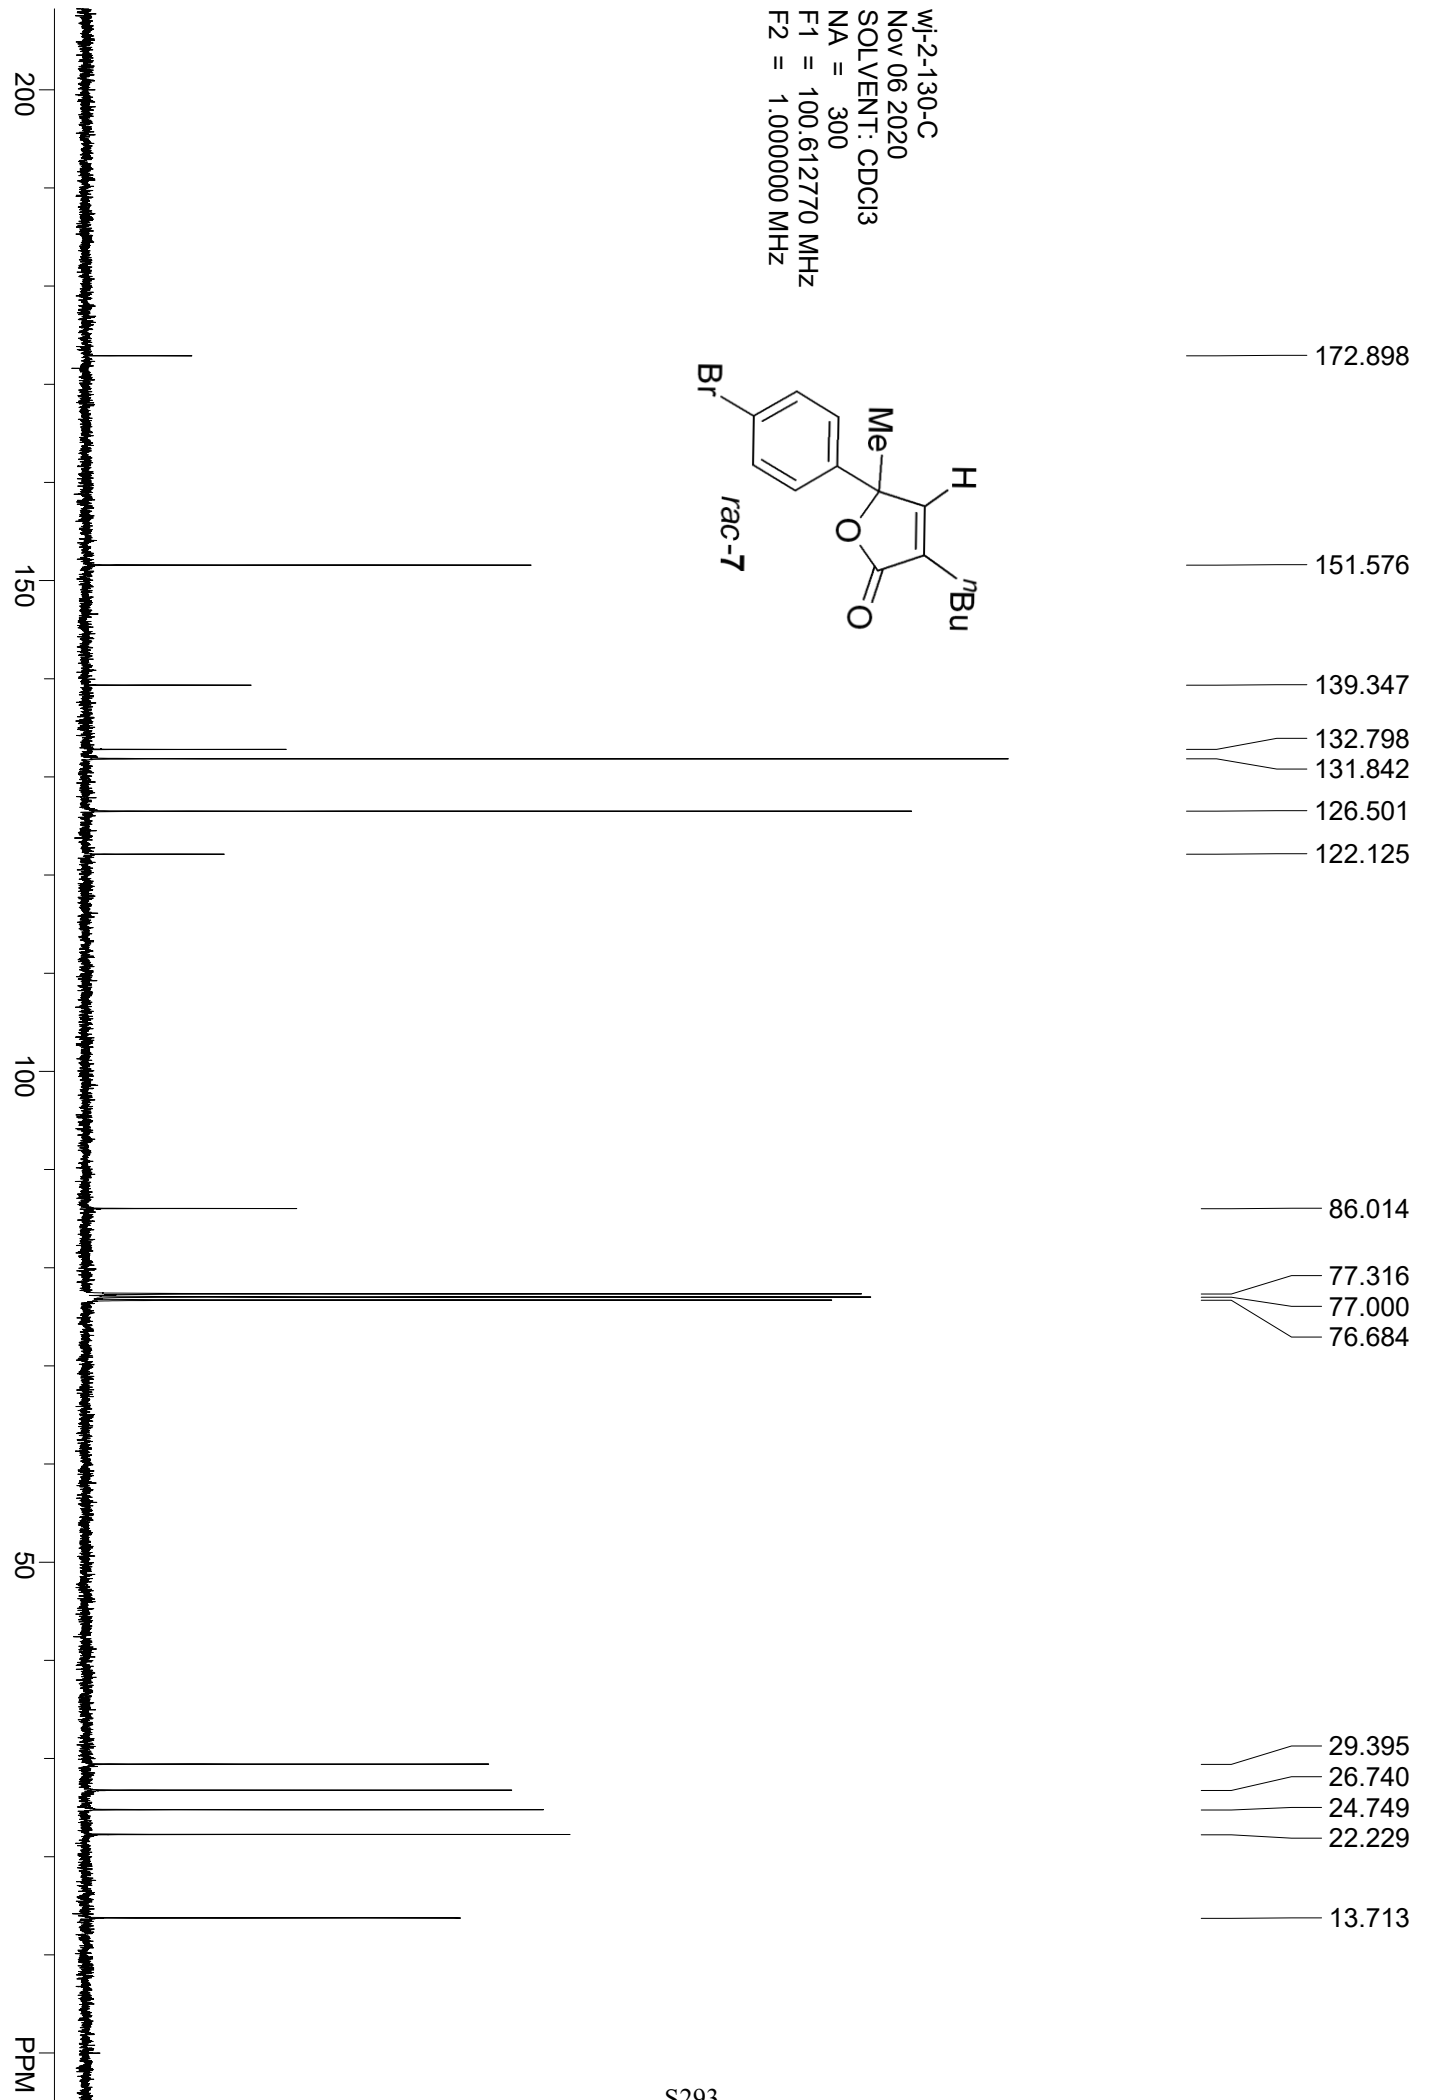

wj-2-134-H  
 Nov 11 2020  
 SOLVENT: CDCl3  
 NA = 4  
 F1 = 400.130005 MHz  
 F2 = 1.000000 MHz

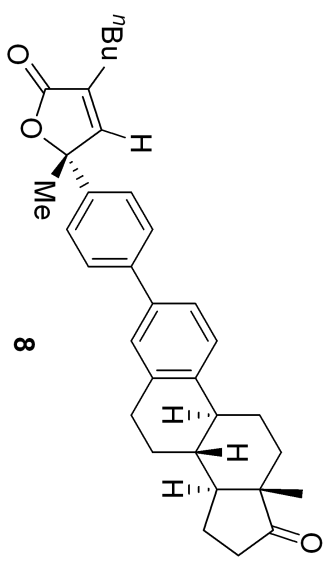

- 7.579
- 7.559
- 7.432
- 7.411
- 7.373
- 7.312
- 7.260
- 7.225

- 3.008
- 2.998
- 2.985
- 2.976
- 2.555
- 2.533
- 2.508
- 2.488
- 2.447
- 2.362
- 2.318
- 2.297
- 2.279
- 2.185
- 2.162
- 2.137
- 2.115
- 2.084
- 2.052
- 2.008
- 1.978
- 1.818
- 1.671
- 1.649
- 1.622
- 1.599
- 1.577
- 1.561
- 1.544
- 1.522
- 1.514
- 1.403
- 1.384
- 1.365
- 1.347
- 0.947
- 0.928
- 0.911
- 0.000

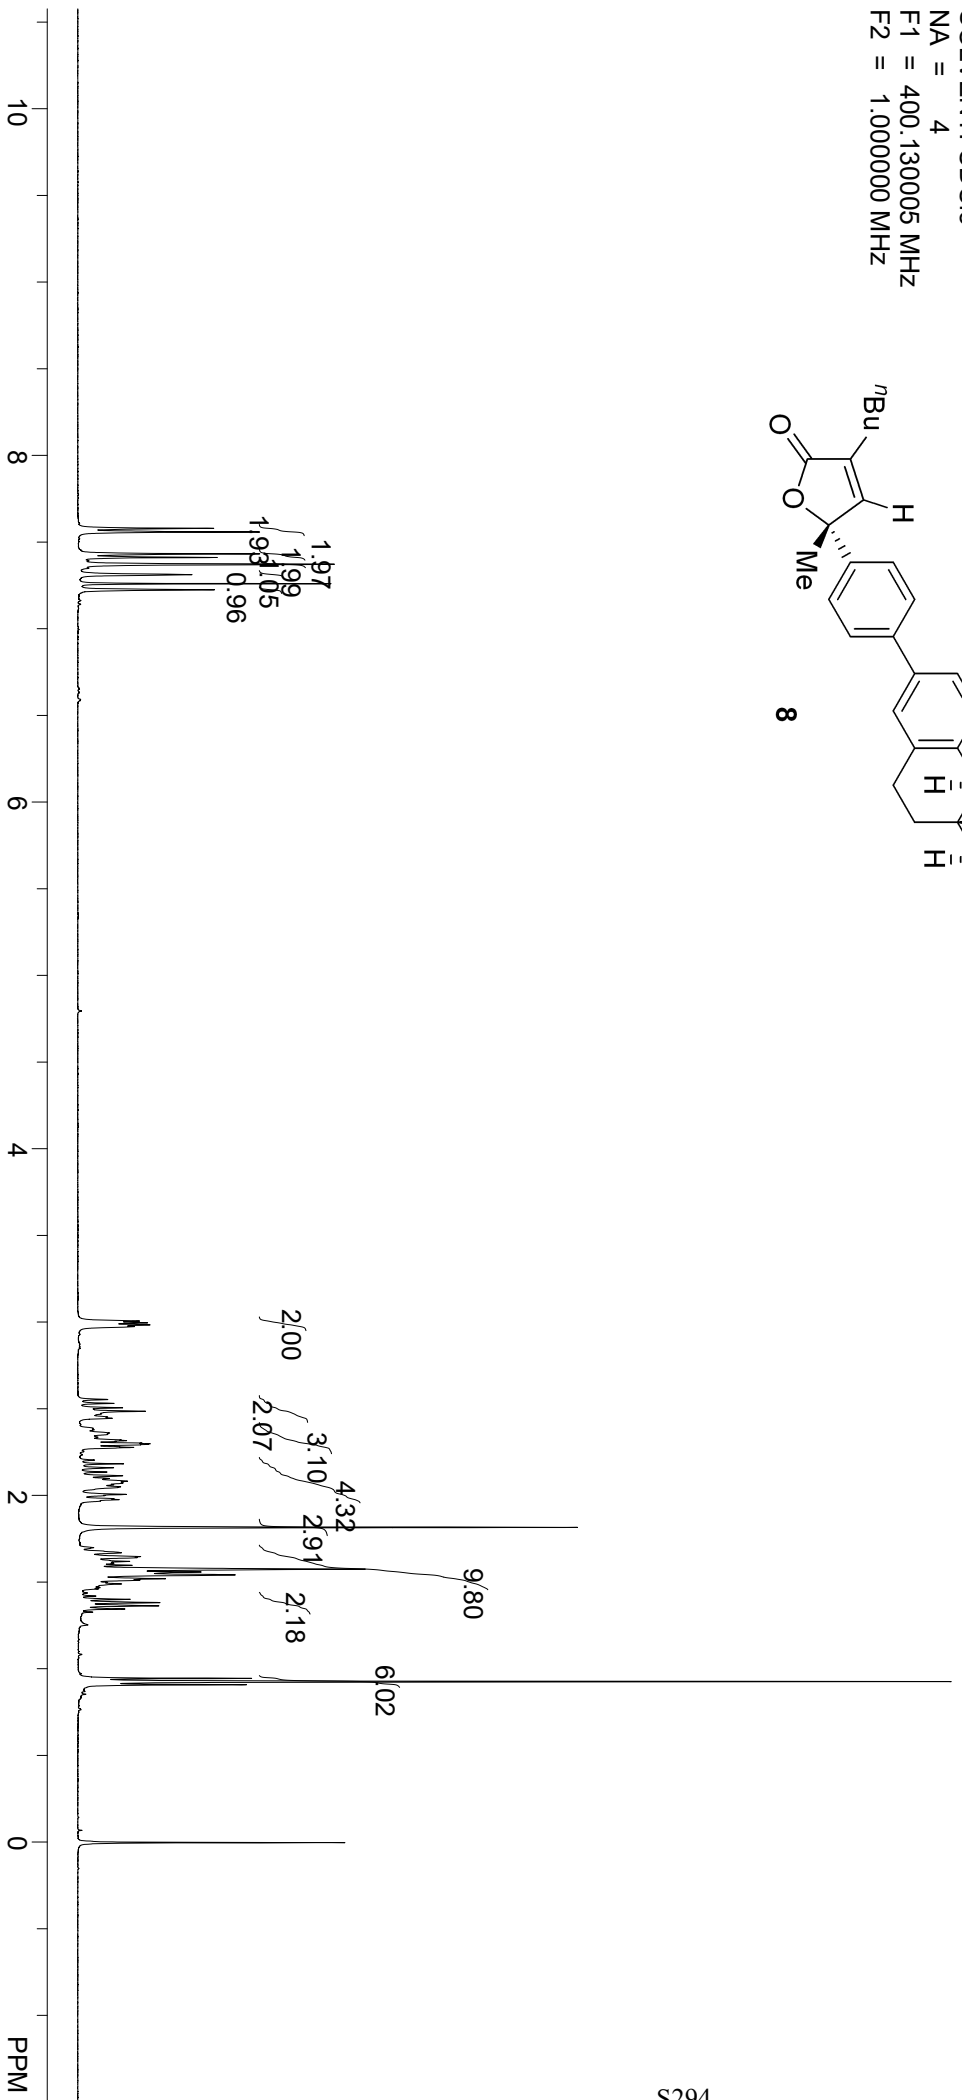

WJ-2-134-C  
Nov 11 2020  
SOLVENT: CDCl3  
NA = 250  
F1 = 100.612770 MHz  
F2 = 1.000000 MHz

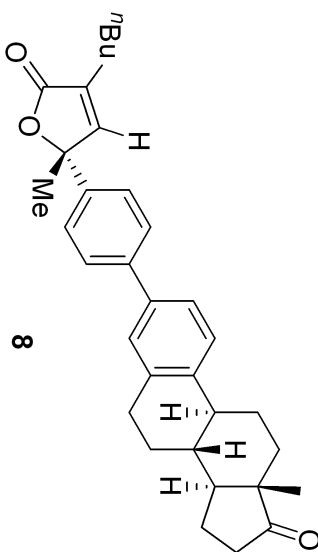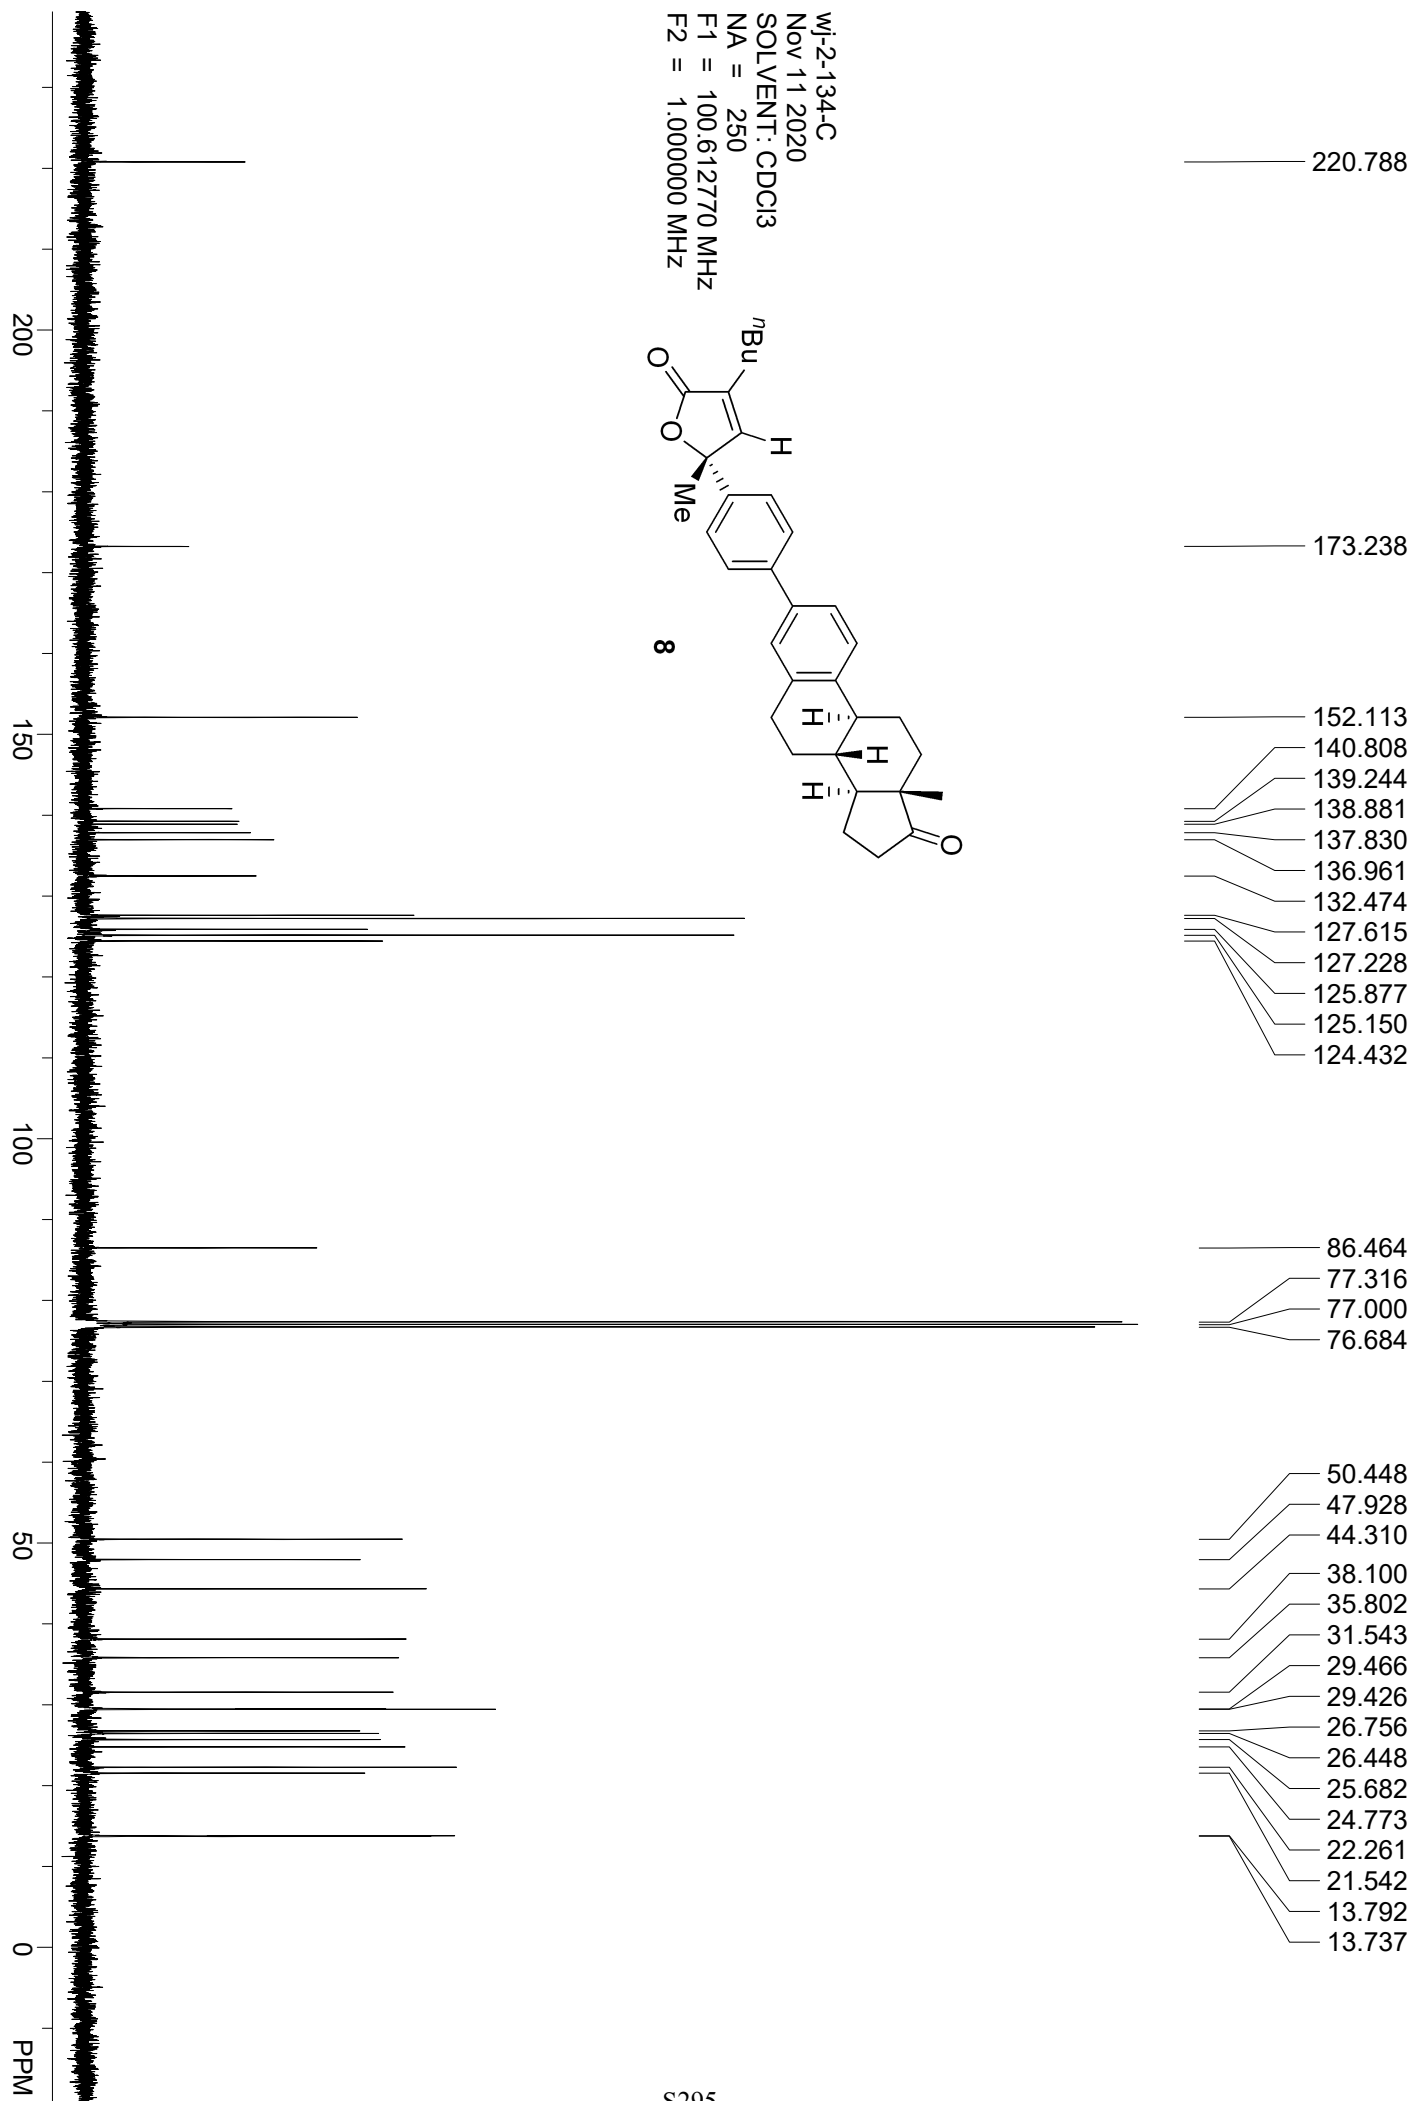

wj-2-129-H  
Nov 06 2020  
SOLVENT: CDCl3  
NA = 4  
F1 = 400.130005 MHz  
F2 = 1.000000 MHz

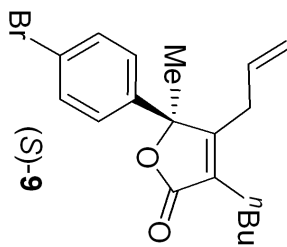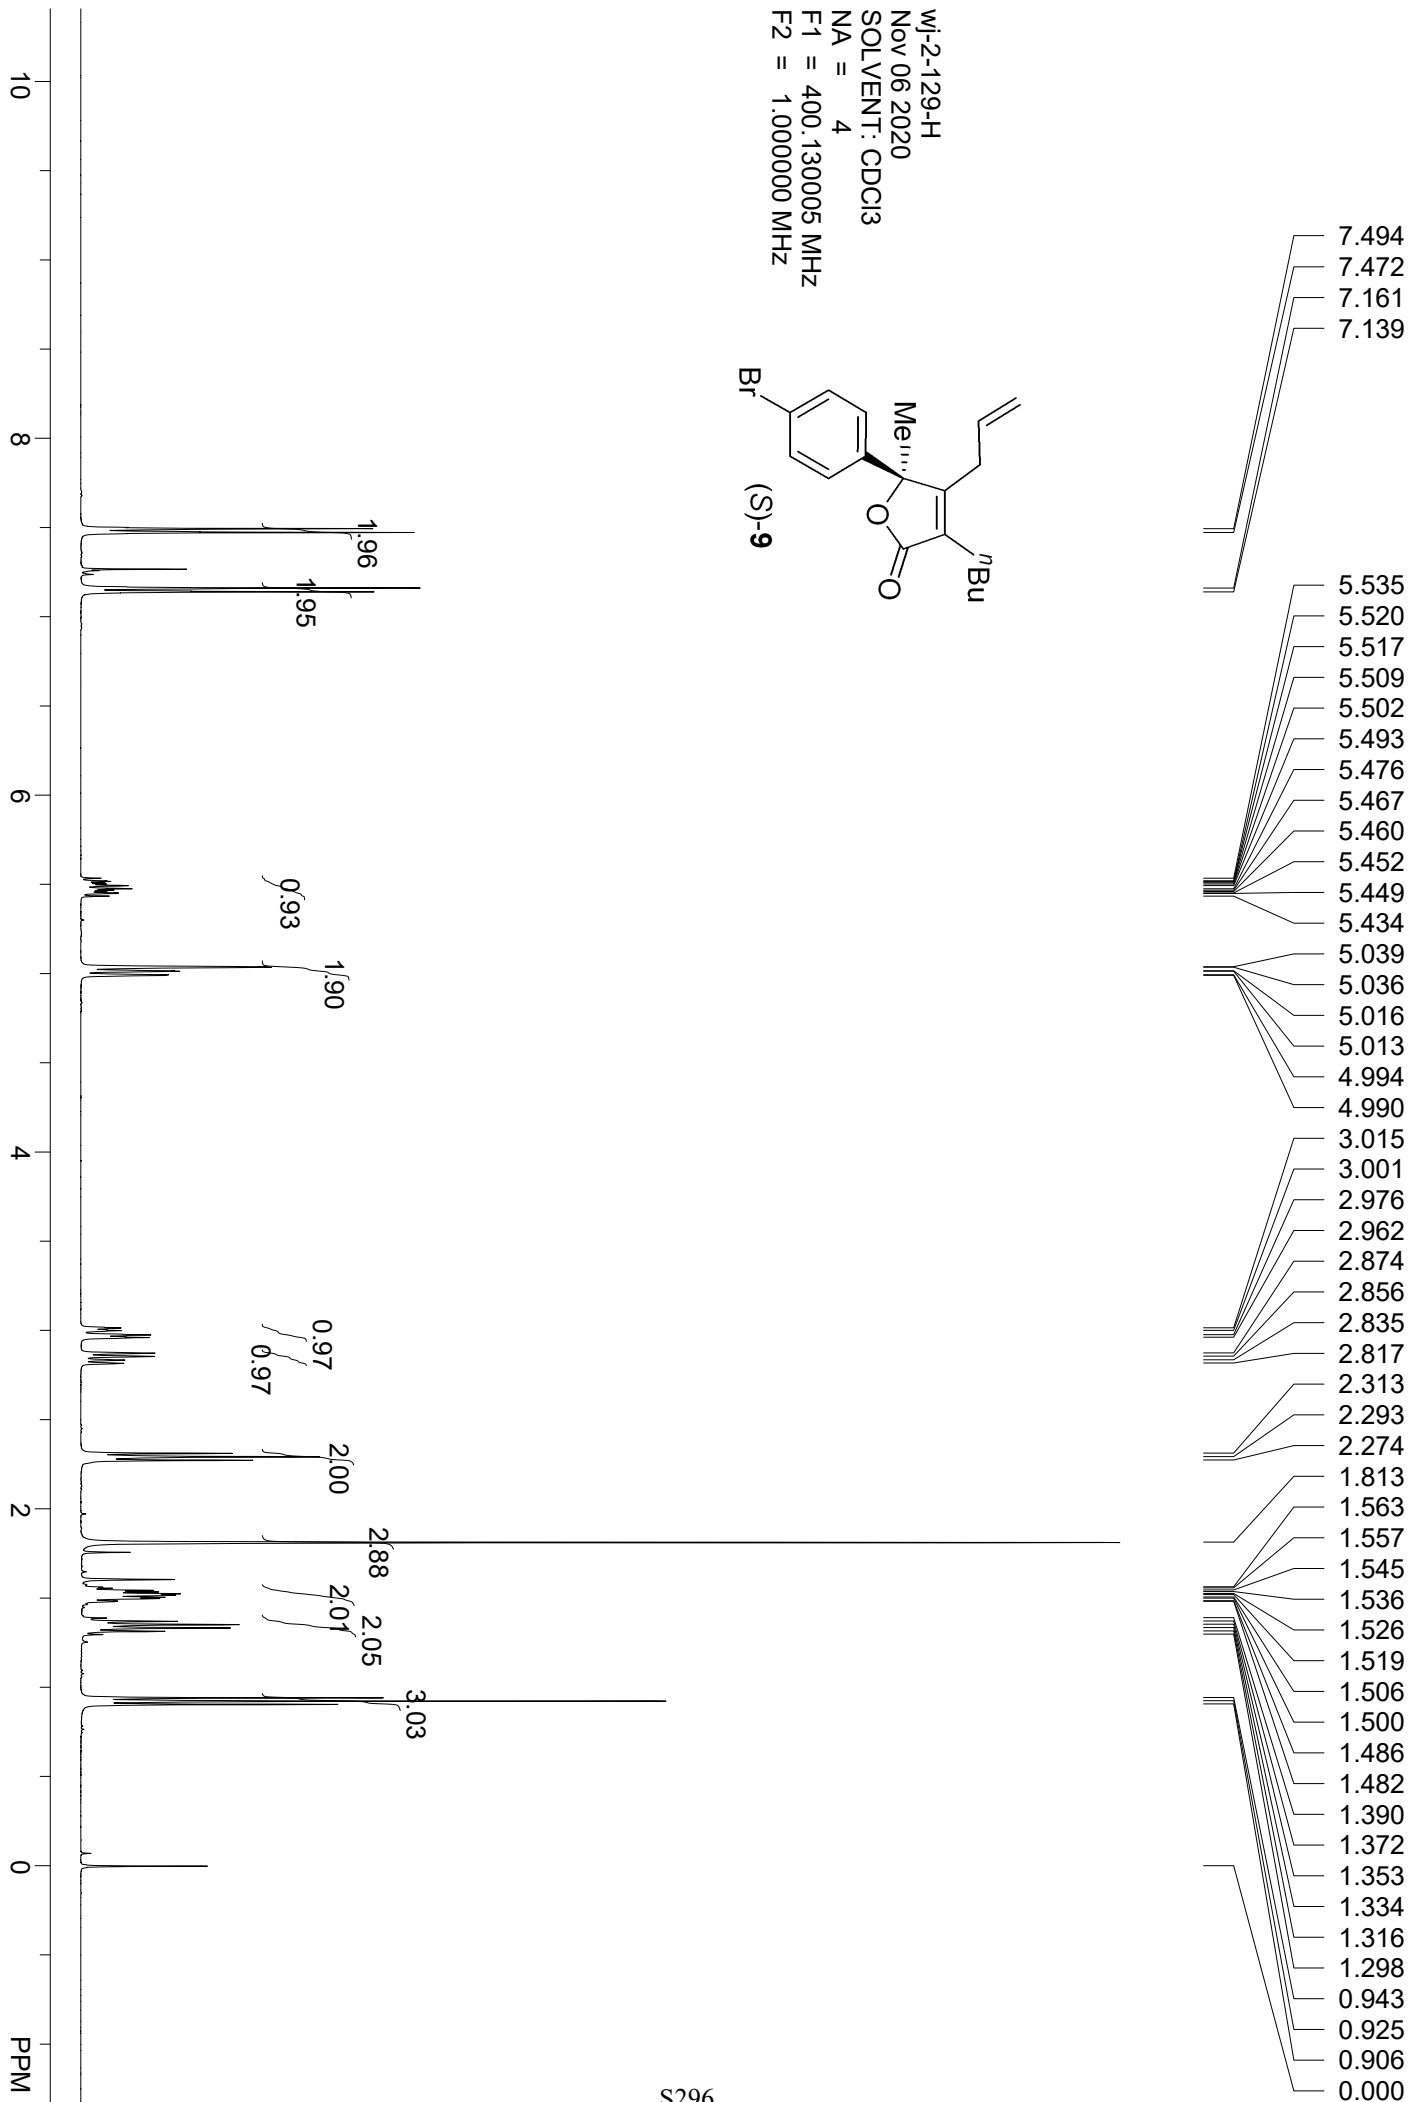



wj-2-129-C  
Nov 06 2020  
SOLVENT: CDCl3  
NA = 300  
F1 = 100.612770 MHz  
F2 = 1.000000 MHz

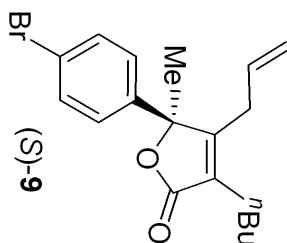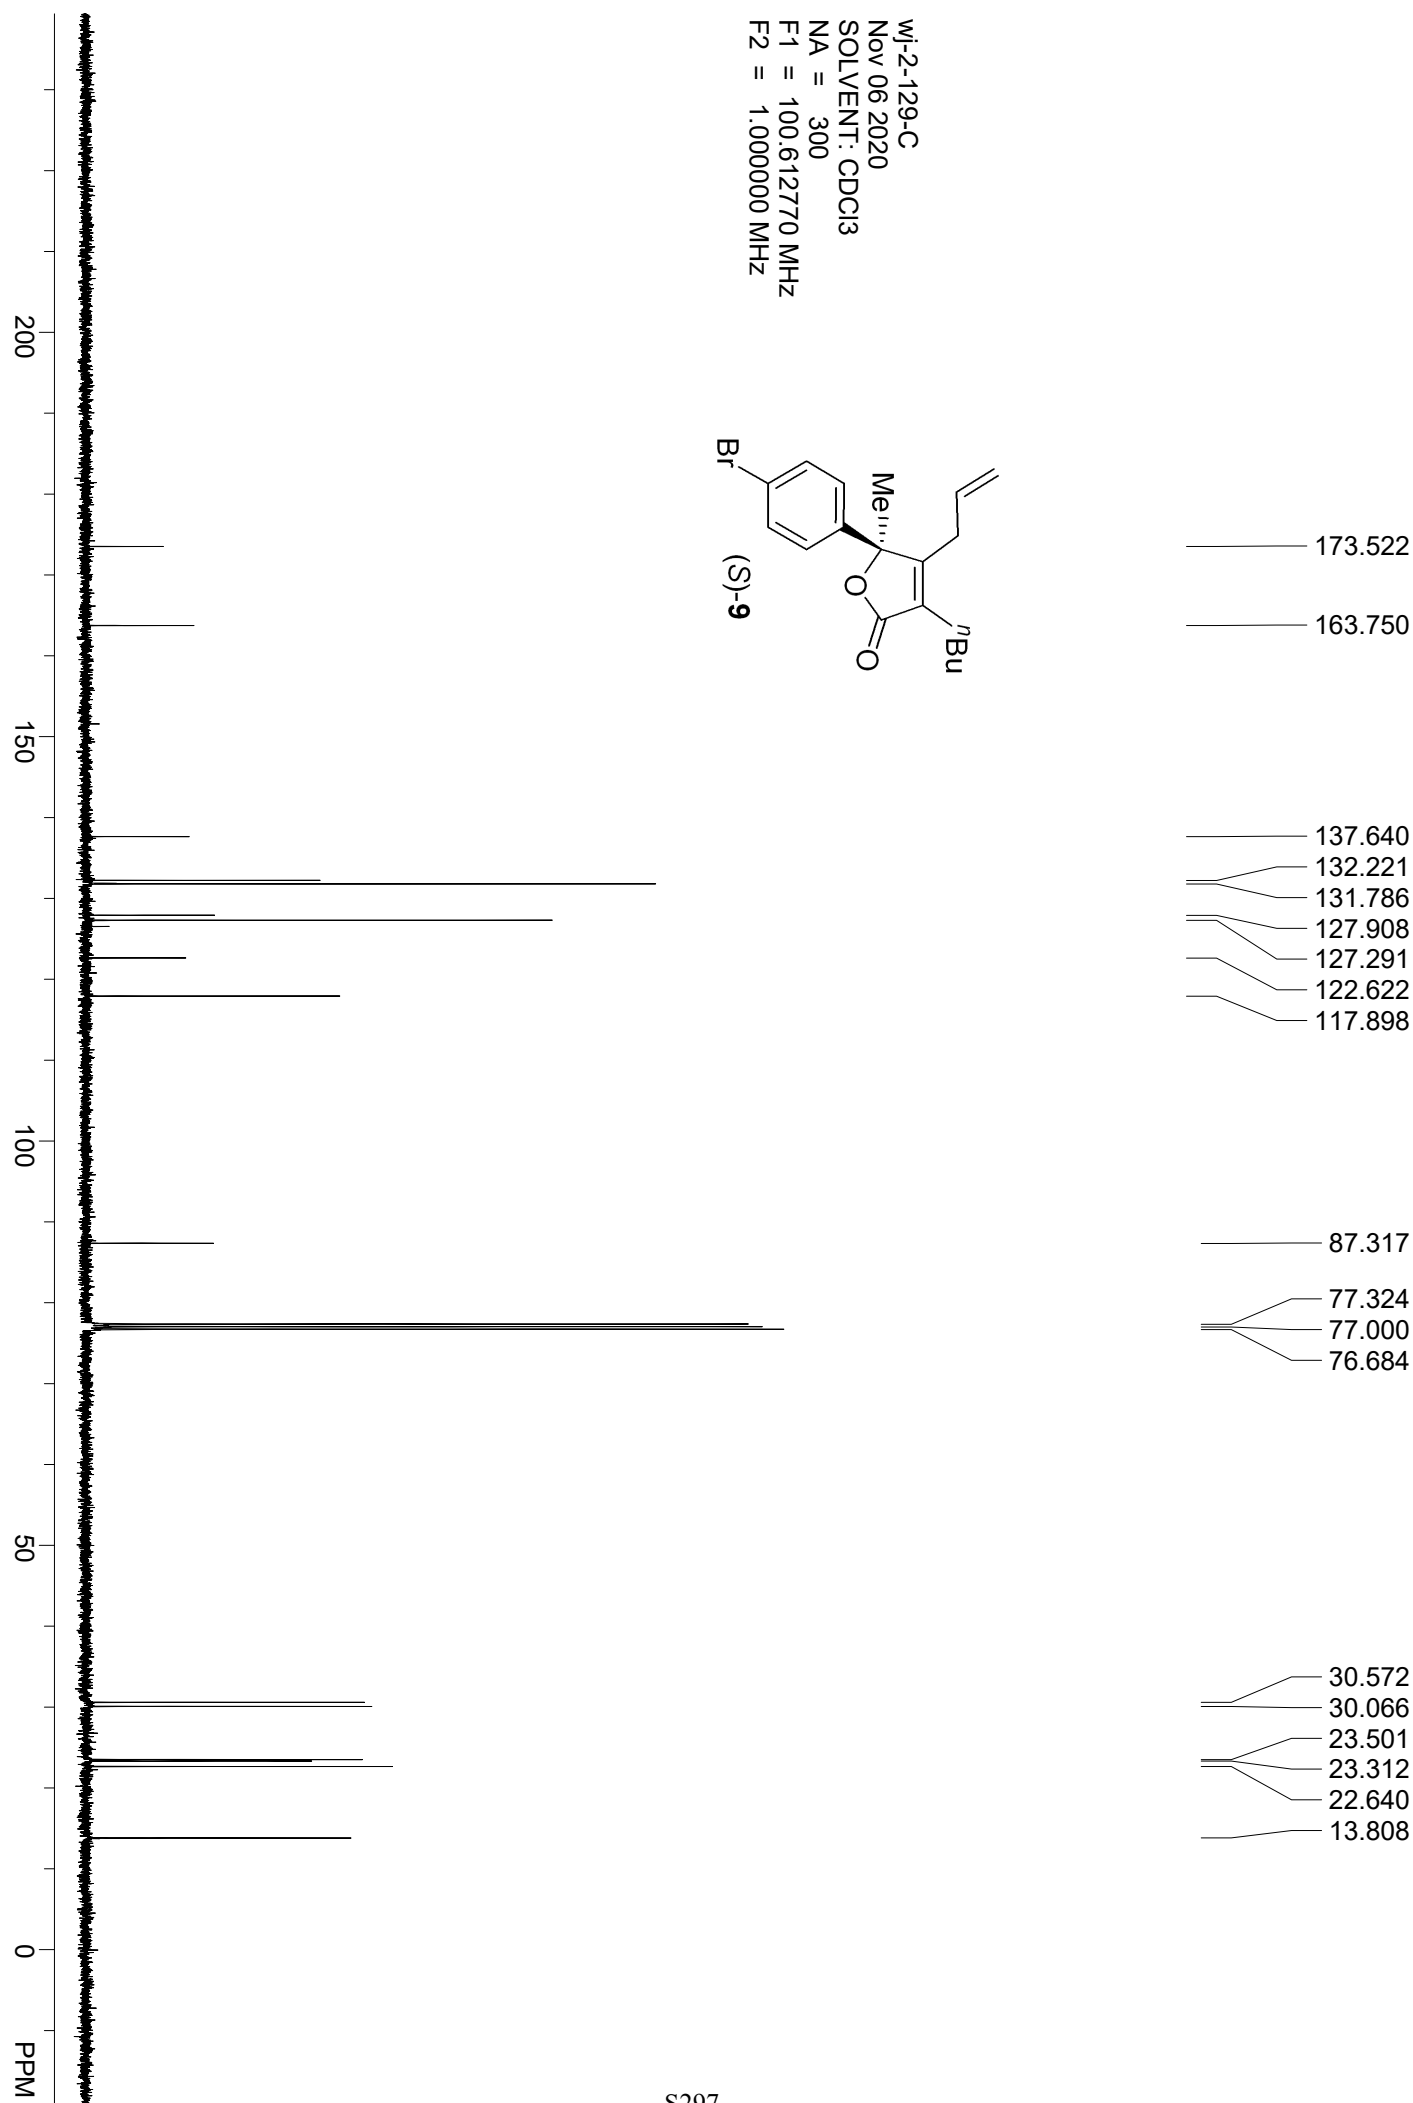

# Area Percent Report

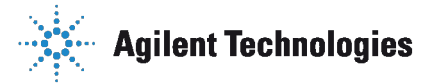

sample wj-2-129-OD-H-99.5-0.5-1.0-214

Data file: C:\Users\Public\Documents\ChemStation\1\Data\zhangq 2020-11-06 15-59-05\012-P2-C1-wj-2-129.D

## Acquisition Data:

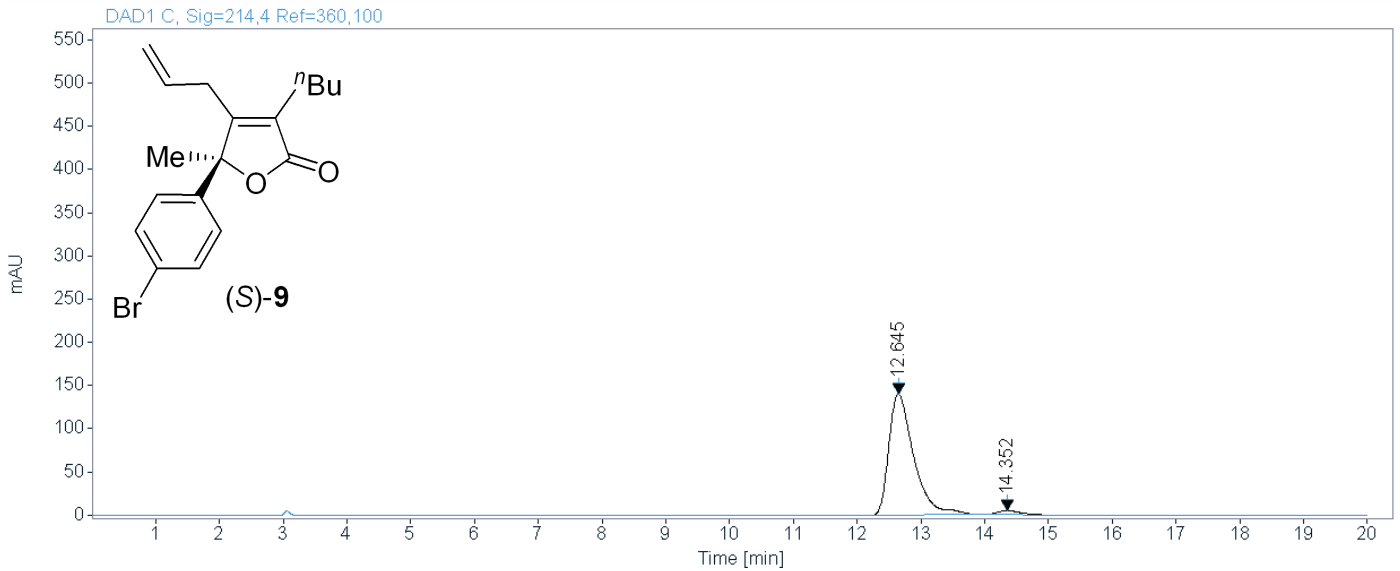

Signal: DAD1 C, Sig=214,4 Ref=360,100

| RT [min] | Width [min] | Height   | Area      | Area%    |
|----------|-------------|----------|-----------|----------|
| 12.645   | 0.4127      | 140.7526 | 3845.3459 | 96.6718  |
| 14.352   | 0.4185      | 4.8197   | 132.3864  | 3.3282   |
|          |             | Sum      | 3977.7323 | 100.0000 |

# Area Percent Report



Agilent Technologies

sample wj-2-129-rac-OD-H-99.5-0.5-1.0-214

Data file: C:\Users\Public\Documents\ChemStation\1\Data\zhangq 2020-11-06 15-59-05\013-P2-C2-wj-2-129-rac.D

## Acquisition Data:

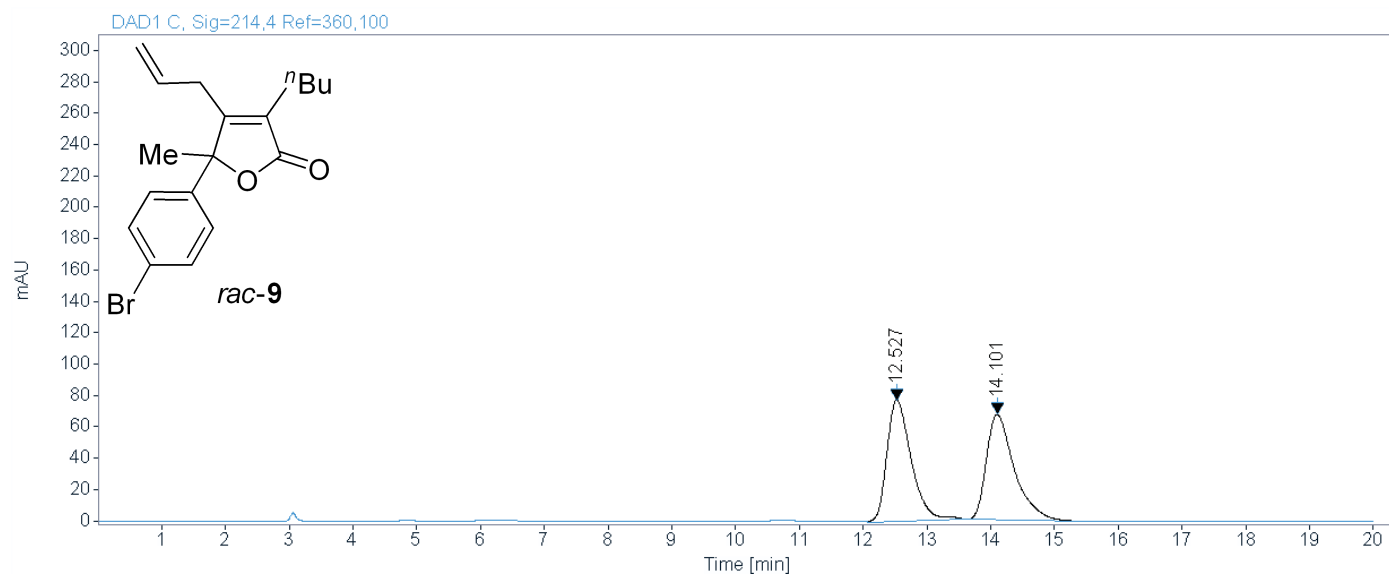

Signal: DAD1 C, Sig=214,4 Ref=360,100

| RT [min] | Width [min] | Height  | Area      | Area%    |
|----------|-------------|---------|-----------|----------|
| 12.527   | 0.4409      | 77.3684 | 2046.8362 | 50.0784  |
| 14.101   | 0.4582      | 67.2166 | 2040.4290 | 49.9216  |
|          | Sum         |         | 4087.2651 | 100.0000 |

7.493  
7.472  
7.161  
7.139

5.534  
5.519  
5.516  
5.509  
5.501  
5.493  
5.475  
5.467  
5.460  
5.452  
5.449  
5.434  
5.038  
5.035  
5.015  
5.012  
4.993  
4.990

3.019  
3.015  
3.011  
3.005  
3.001  
2.996  
2.980  
2.976  
2.972  
2.966  
2.962  
2.958  
2.874  
2.856  
2.835  
2.817  
2.313  
2.293  
2.274

1.813  
1.563  
1.557  
1.545  
1.536  
1.526  
1.519  
1.506  
1.499  
1.486  
1.482  
1.390  
1.372  
1.353  
1.334  
1.316  
1.297  
0.943  
0.924  
0.906  
0.000

wf-2-126-H  
Nov 05 2020  
SOLVENT: CDCl3  
NA = 4  
F1 = 400.130005 MHz  
F2 = 1.000000 MHz

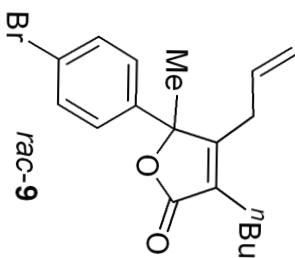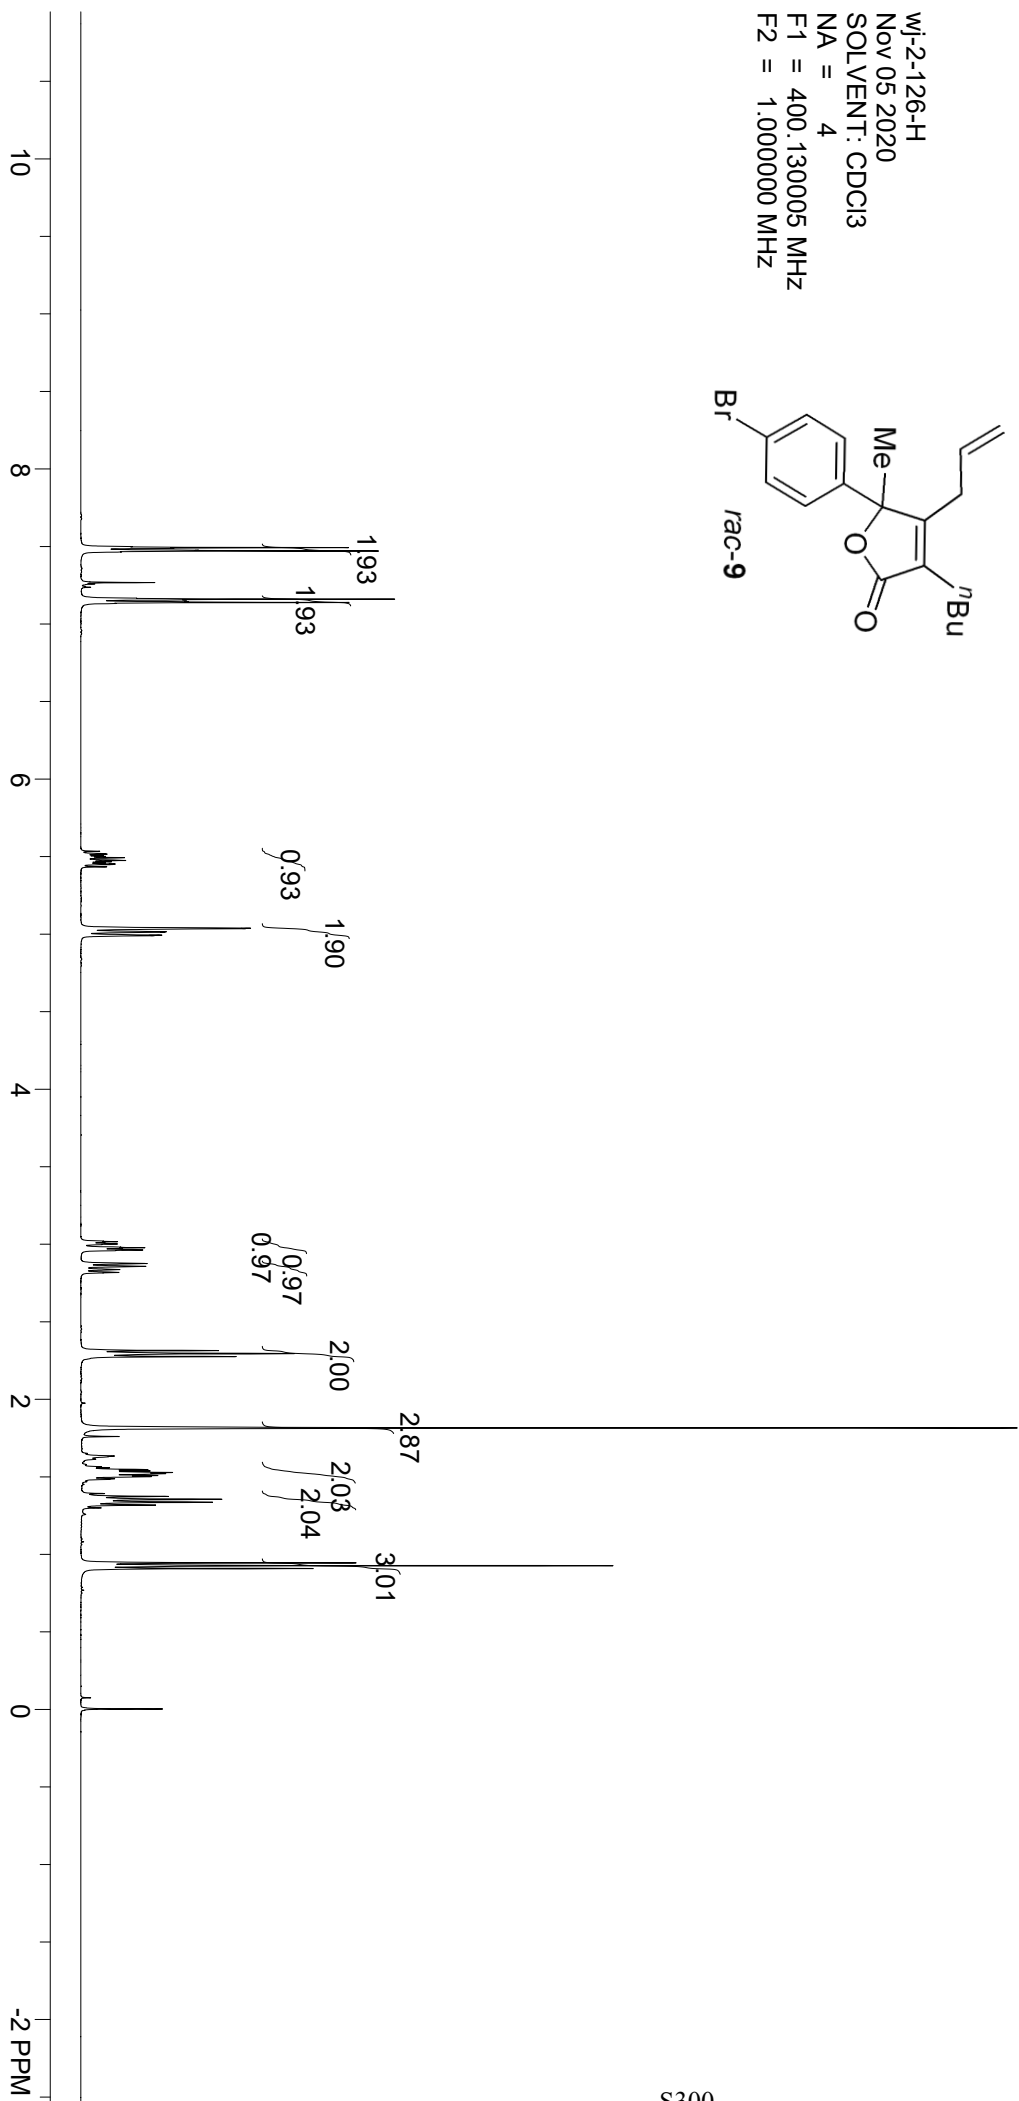

wj-2-126-C  
Nov 05 2020  
SOLVENT: CDCl3  
NA = 201  
F1 = 100.612770 MHz  
F2 = 1.000000 MHz

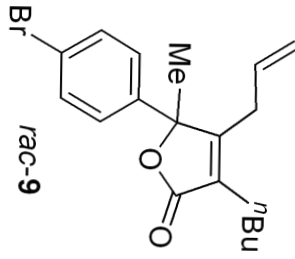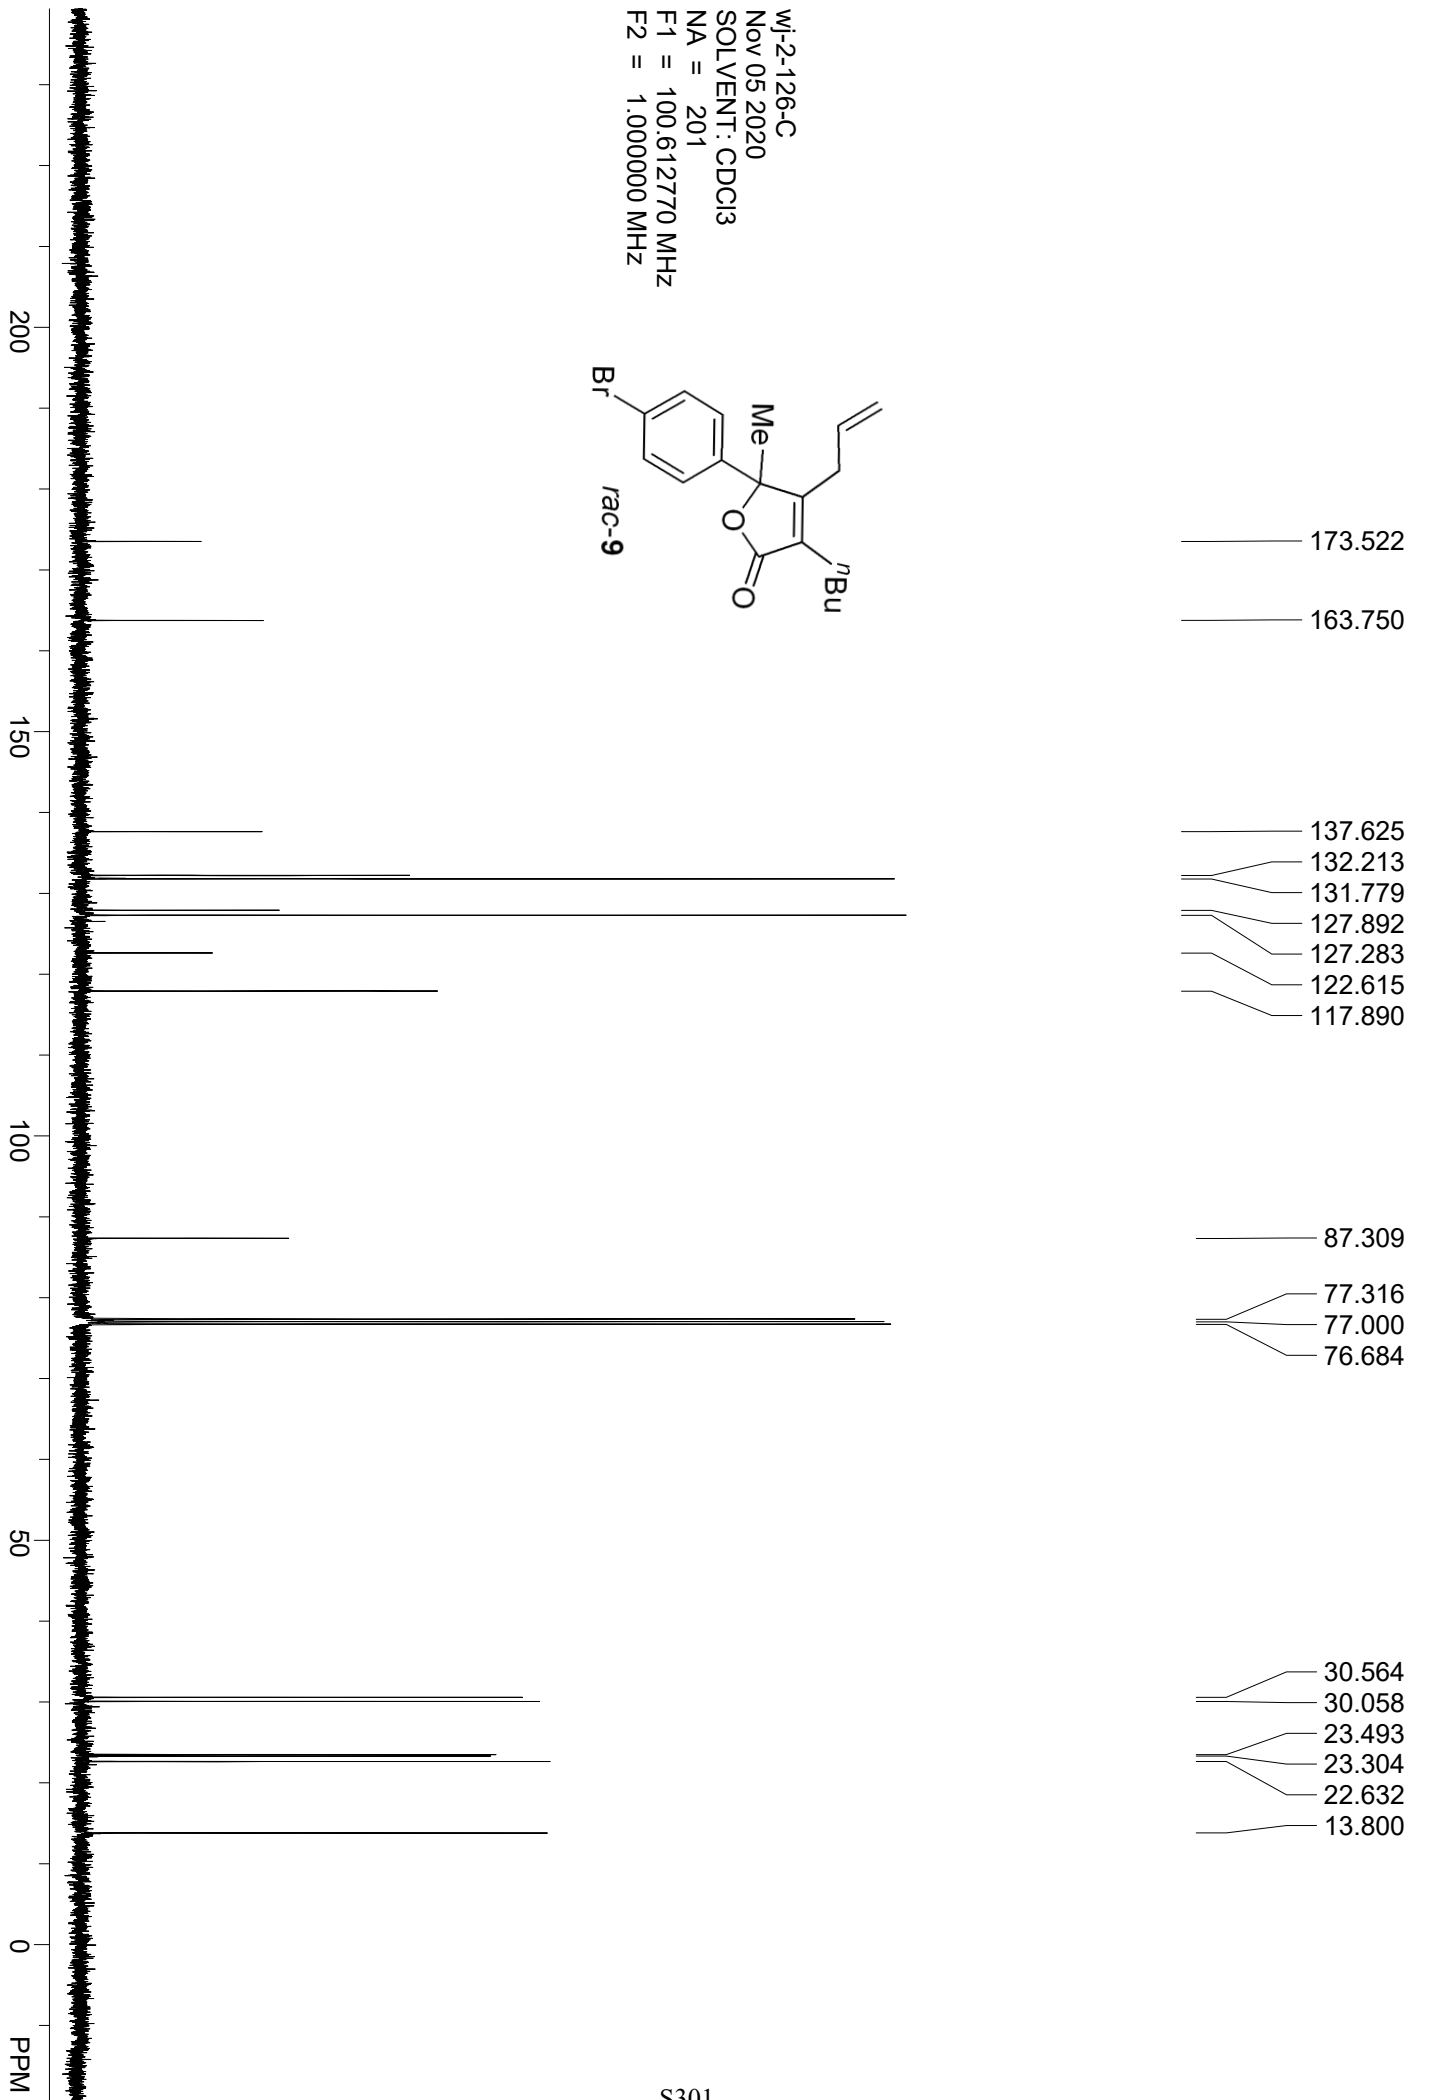

WJ-2-128-H  
Nov 05 2020  
SOLVENT: CDCl3  
NA = 4  
F1 = 400.130005 MHz  
F2 = 1.000000 MHz

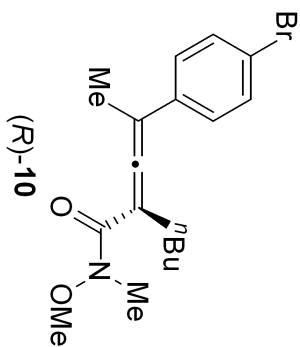

7.459  
7.438  
7.280  
7.267  
7.258

3.498

3.225

2.423

2.406

2.387

2.141

1.461

1.453

1.440

1.433

1.422

1.405

1.391

1.374

1.356

1.336

0.905

0.887

0.870

-0.000

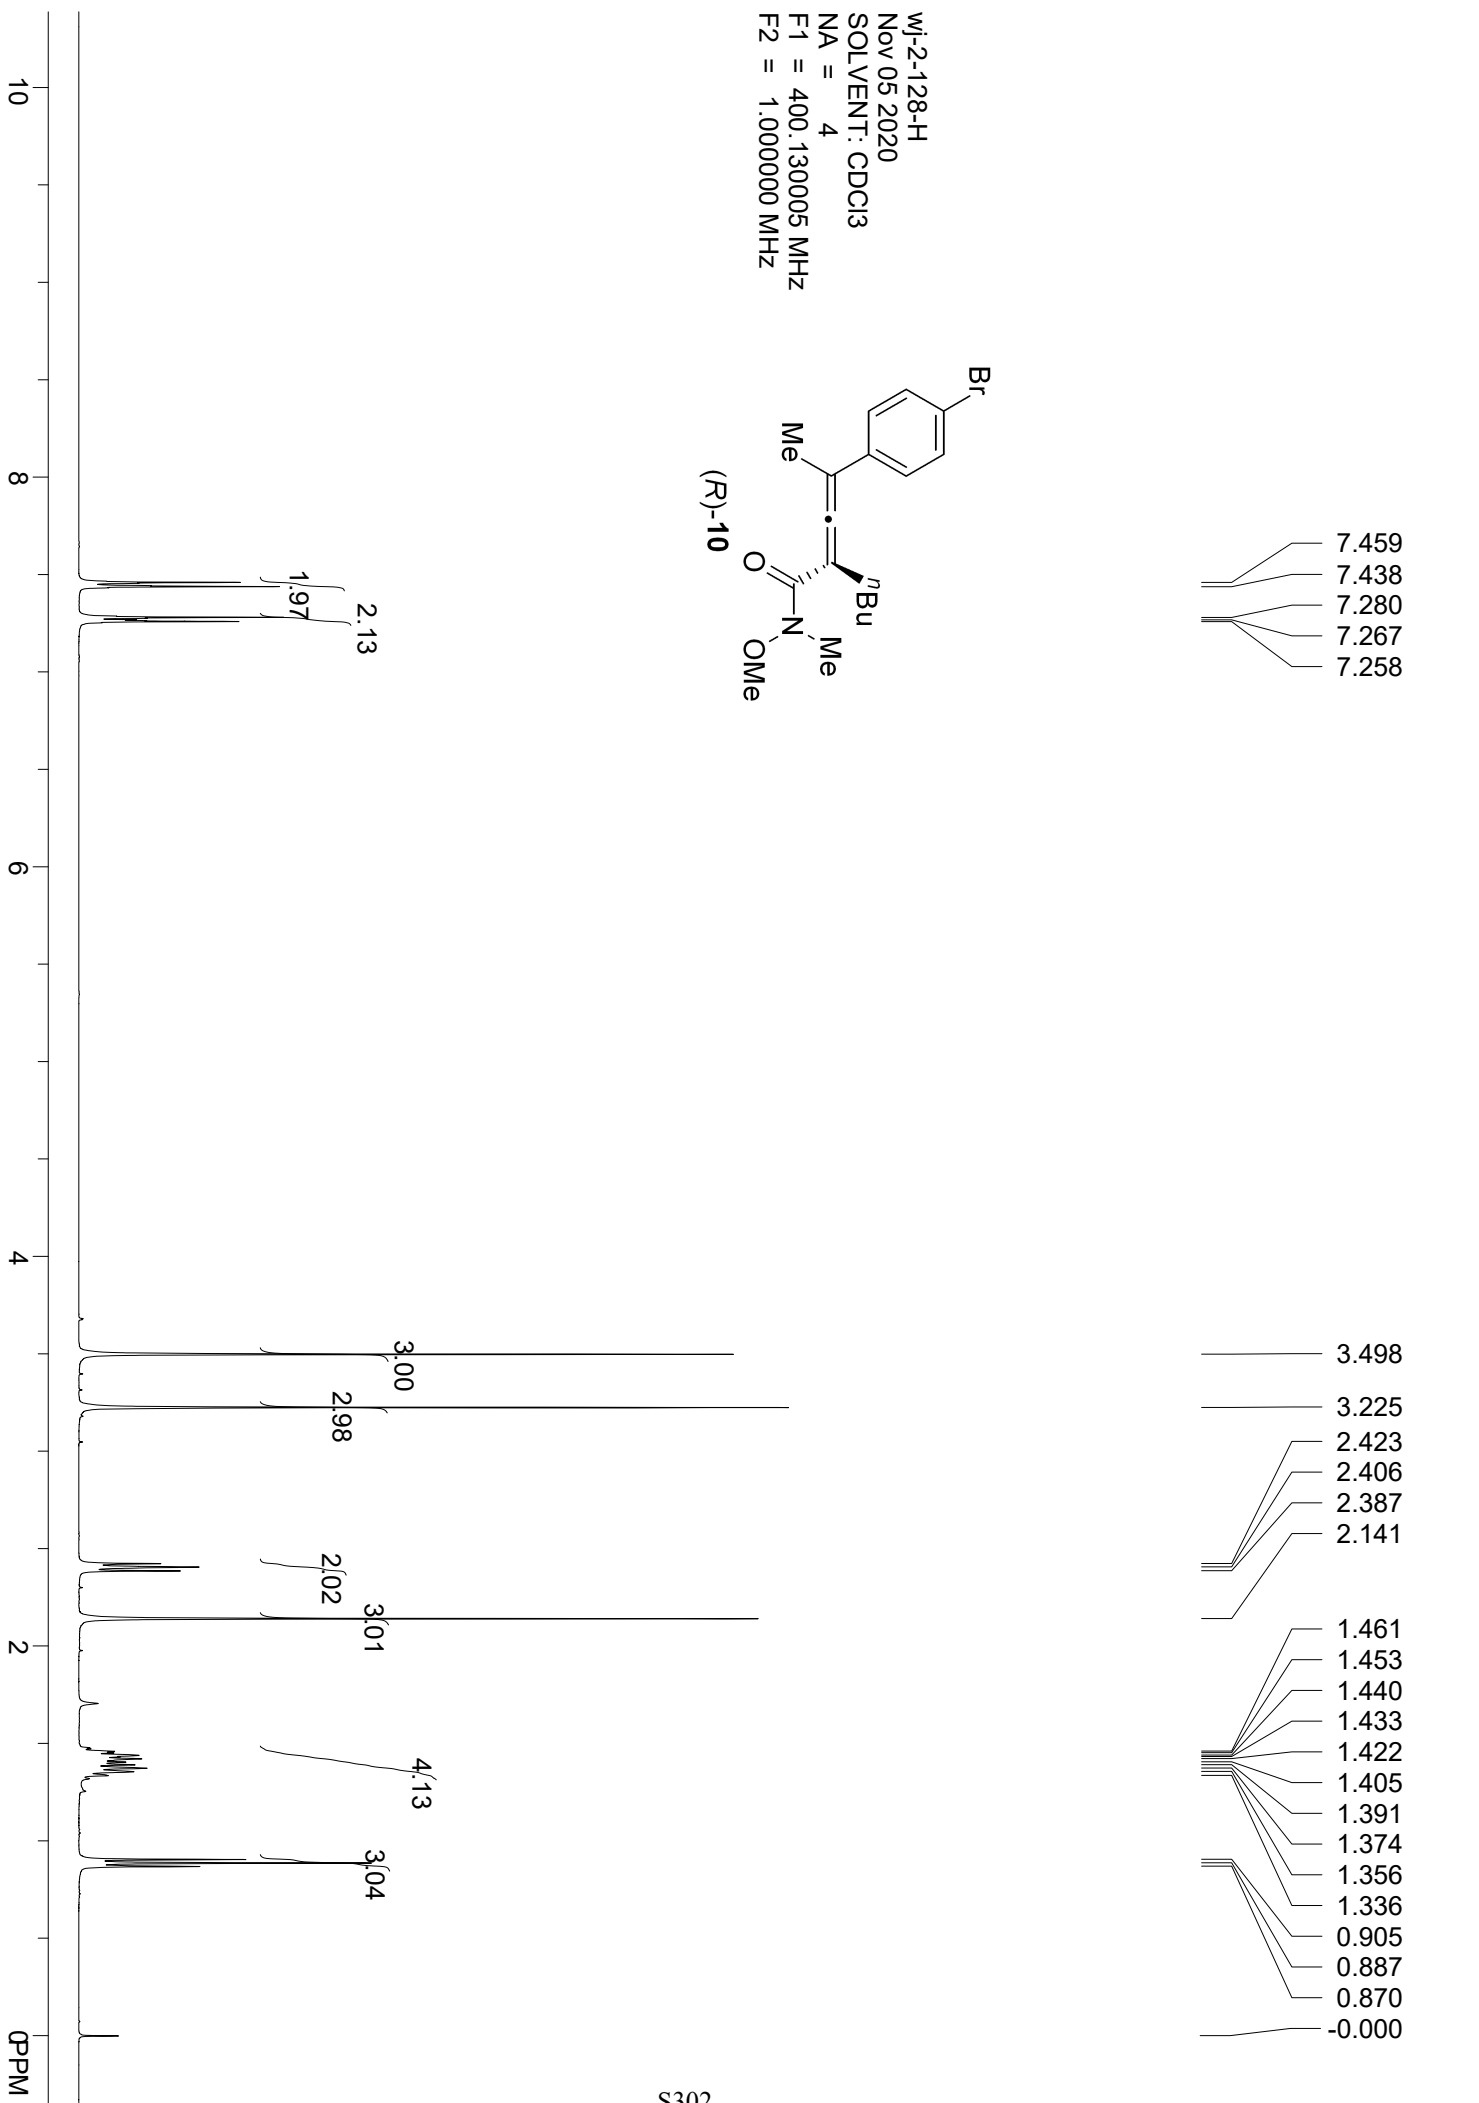

wj-2-128-C  
Nov 05 2020  
SOLVENT: CDCl3  
NA = 250  
F1 = 100.612770 MHz  
F2 = 1.000000 MHz

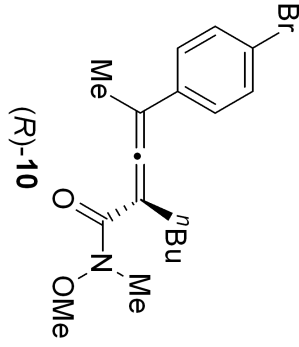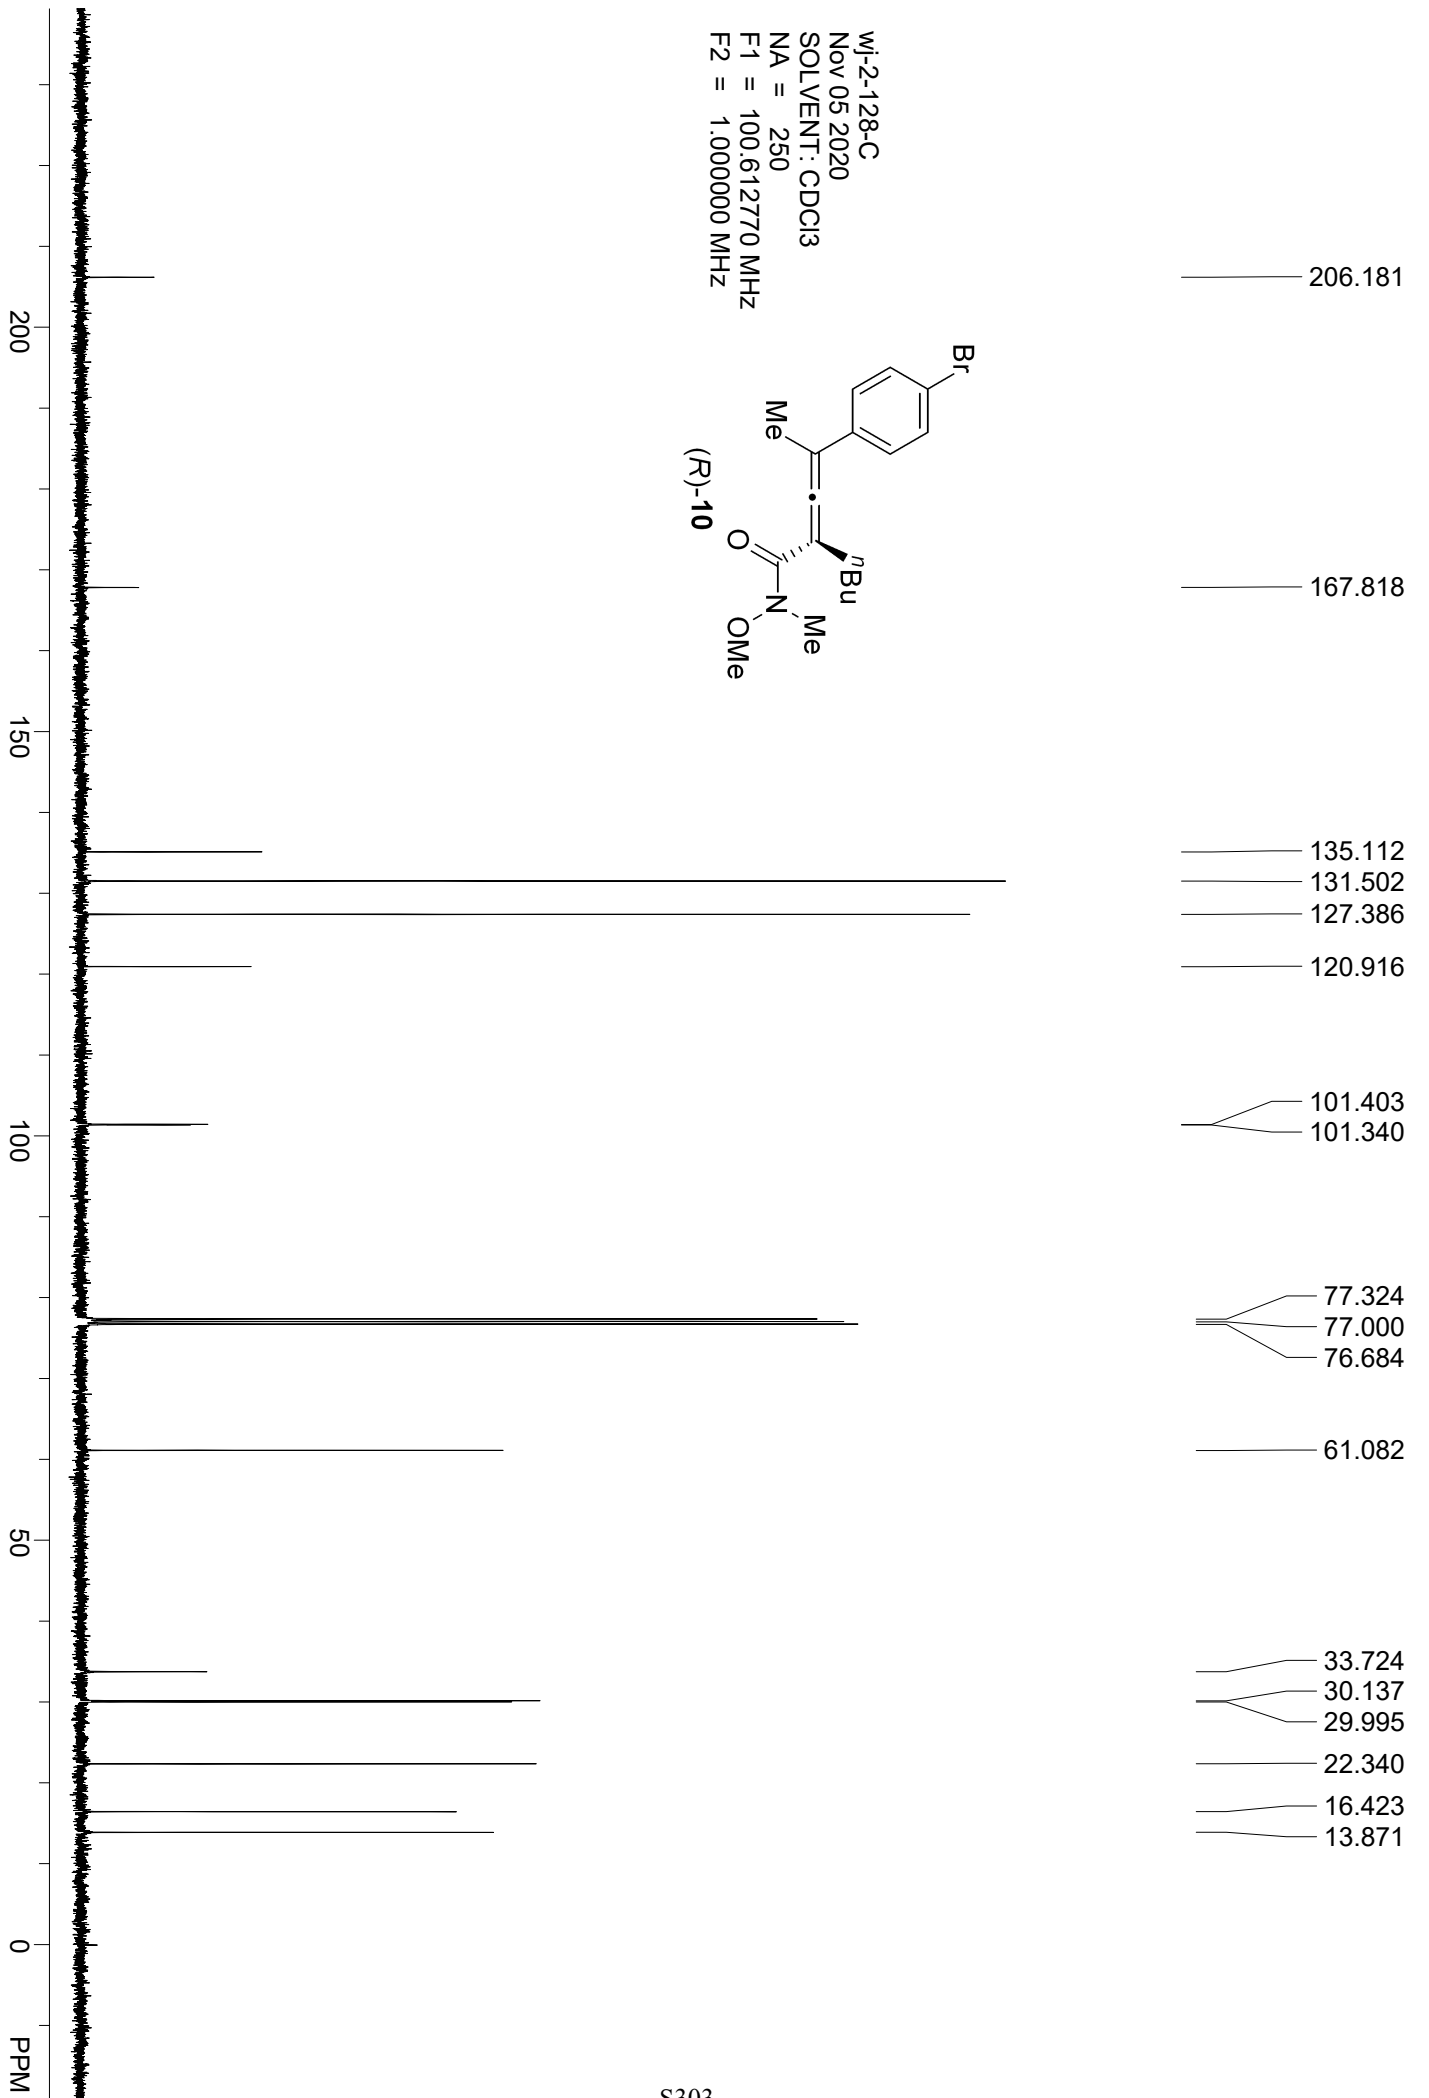

# Area Percent Report



sample wj-2-128-OD-H-99-1-1.0-214

Data file: C:\Users\Public\Documents\ChemStation\1\Data\WJ\_LC 2020-11-05 11-10-49\040-P2-C1-wj-2-128.D

## Acquisition Data:

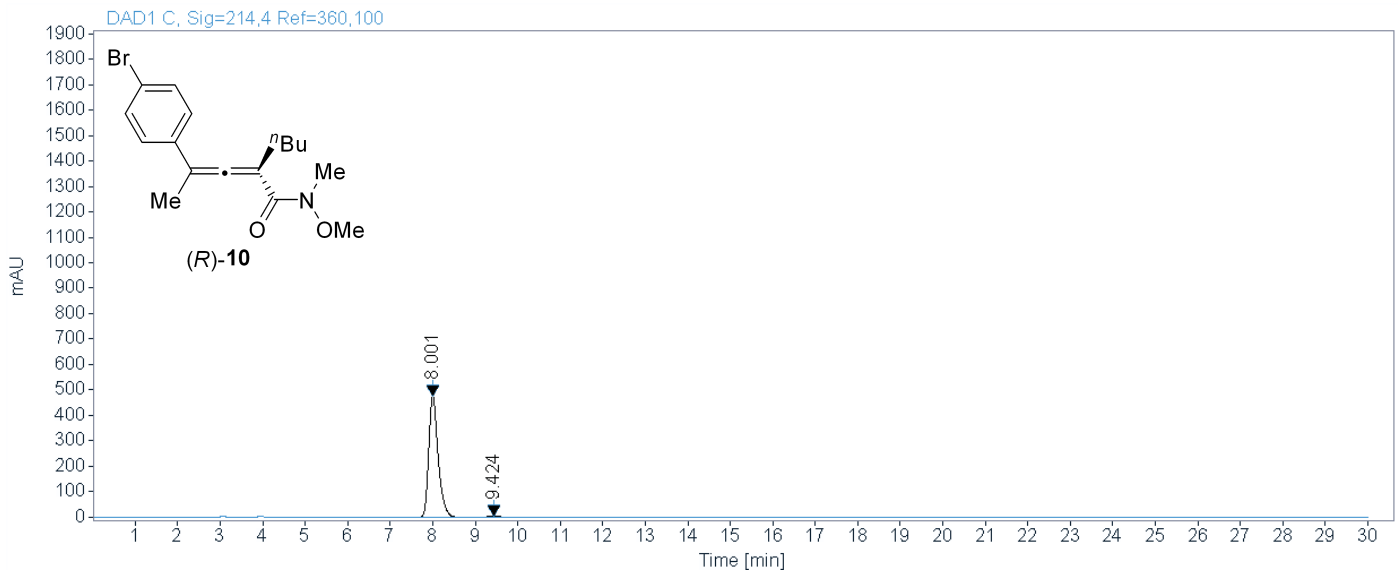

Signal: DAD1 C, Sig=214,4 Ref=360,100

| RT [min] | Width [min] | Height   | Area      | Area%    |
|----------|-------------|----------|-----------|----------|
| 8.001    | 0.2336      | 477.2816 | 7345.8462 | 98.5817  |
| 9.424    | 0.2756      | 5.7728   | 105.6875  | 1.4183   |
|          |             | Sum      | 7451.5337 | 100.0000 |



# Area Percent Report



sample wj-2-128--rac-OD-H-99-1-1.0-214

Data file: C:\Users\Public\Documents\ChemStation\1\Data\WJ\_LC 2020-11-05 11-10-49\041-P2-C2-wj-2-128-rac.D

## Acquisition Data:

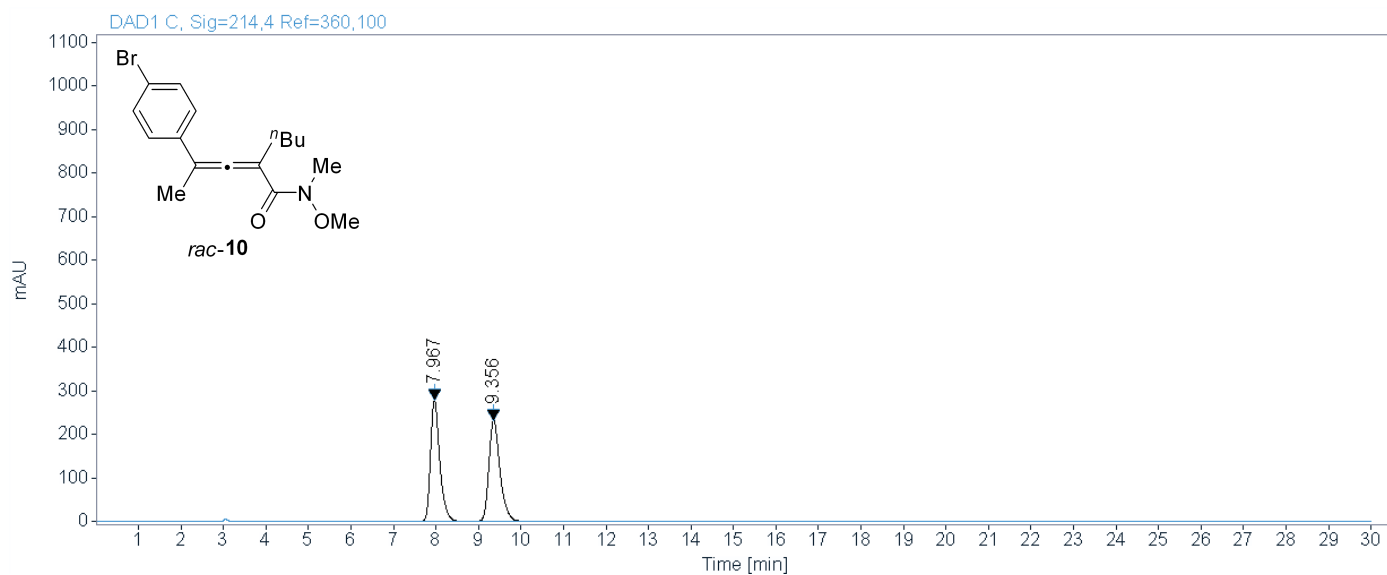

Signal: DAD1 C, Sig=214,4 Ref=360,100

| RT [min] | Width [min] | Height   | Area      | Area%    |
|----------|-------------|----------|-----------|----------|
| 7.967    | 0.2285      | 278.4149 | 4211.4351 | 50.0043  |
| 9.356    | 0.2778      | 231.9053 | 4210.7114 | 49.9957  |
| Sum      |             |          | 8422.1465 | 100.0000 |

wj-2-127-H  
Nov 05 2020  
SOLVENT: CDCl3  
NA = 4  
F1 = 400.130005 MHz  
F2 = 1.000000 MHz

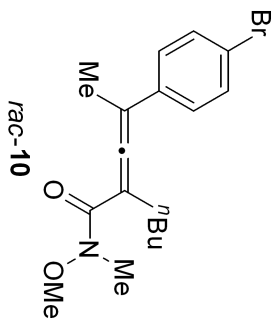

7.459  
7.438  
7.280  
7.258

3.498

3.224

2.423

2.405

2.386

2.141

1.460

1.452

1.439

1.432

1.421

1.405

1.391

1.374

1.356

1.336

0.905

0.887

0.870

0.000

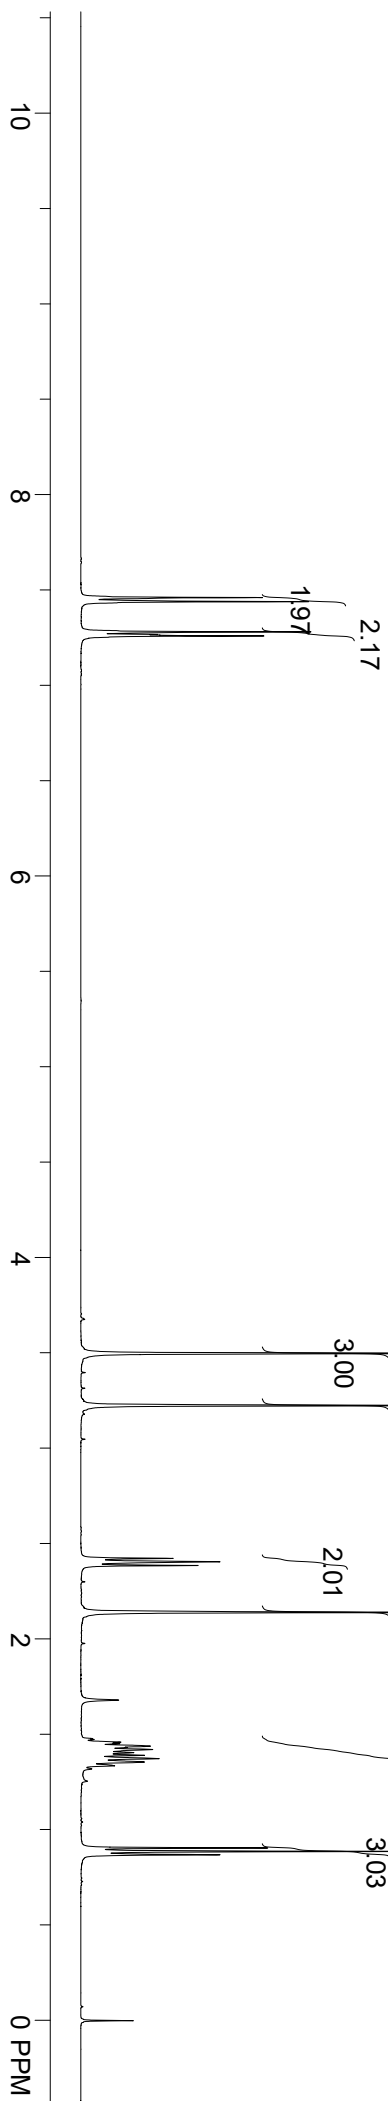

wj-2-127-C  
Nov 05 2020  
SOLVENT: CDCl3  
NA = 250  
F1 = 100.612770 MHz  
F2 = 1.000000 MHz

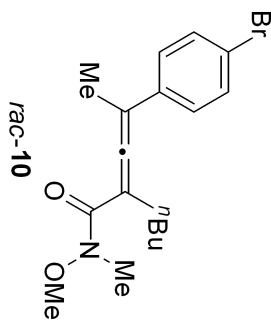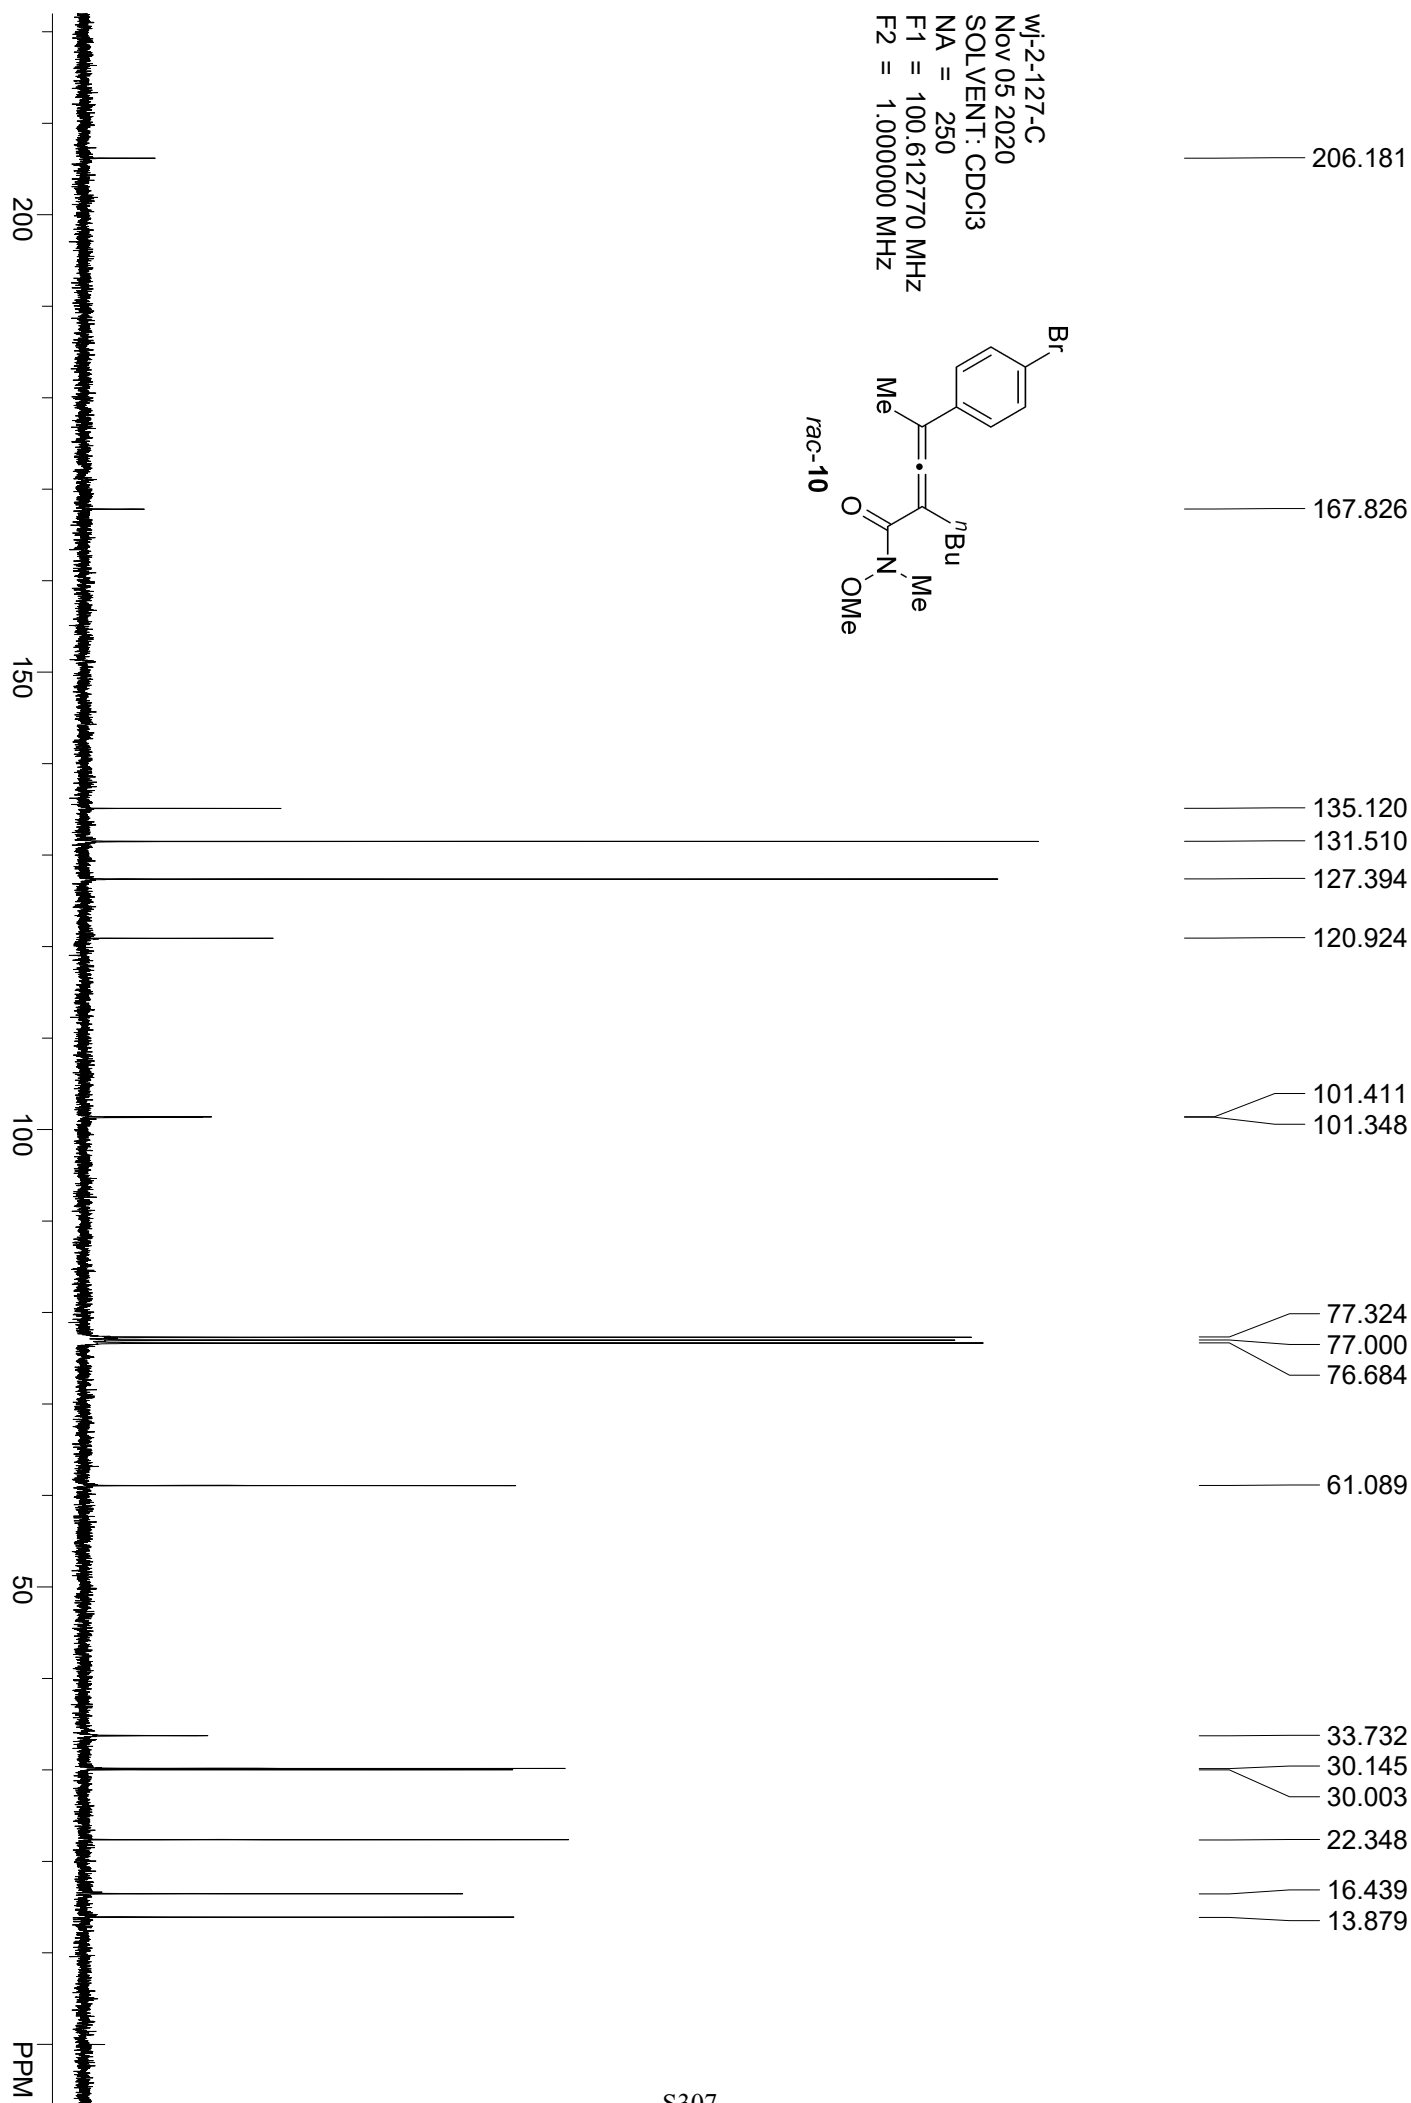

wj-2-136-H  
Nov 12 2020  
SOLVENT: CDCl3  
NA = 16  
F1 = 400.130005 MHz  
F2 = 1.000000 MHz

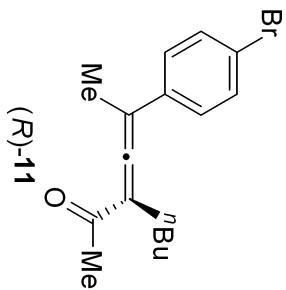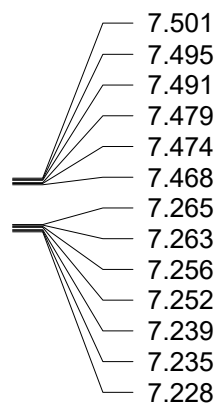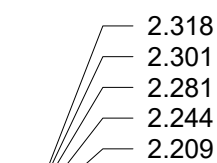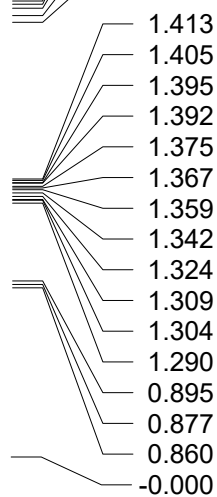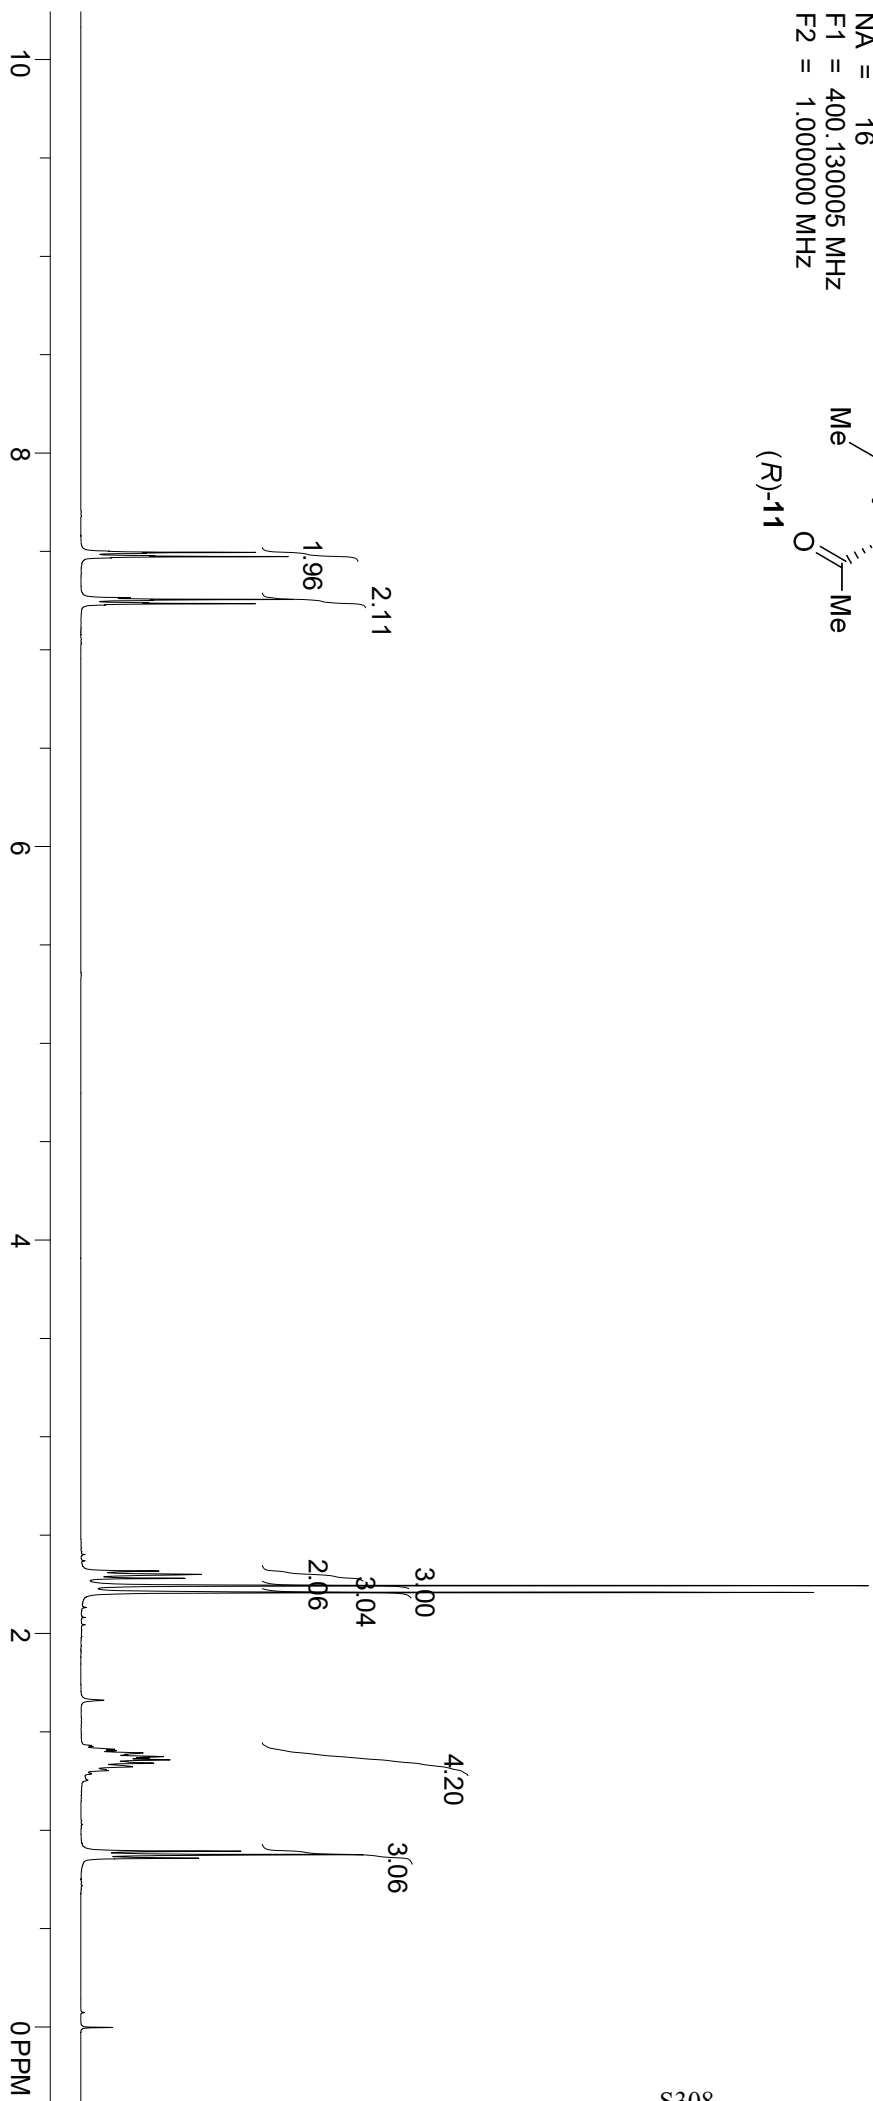

wj-2-136-C  
Nov 12 2020  
SOLVENT: CDCl3  
NA = 126  
F1 = 100.612770 MHz  
F2 = 1.000000 MHz

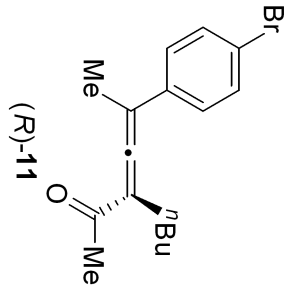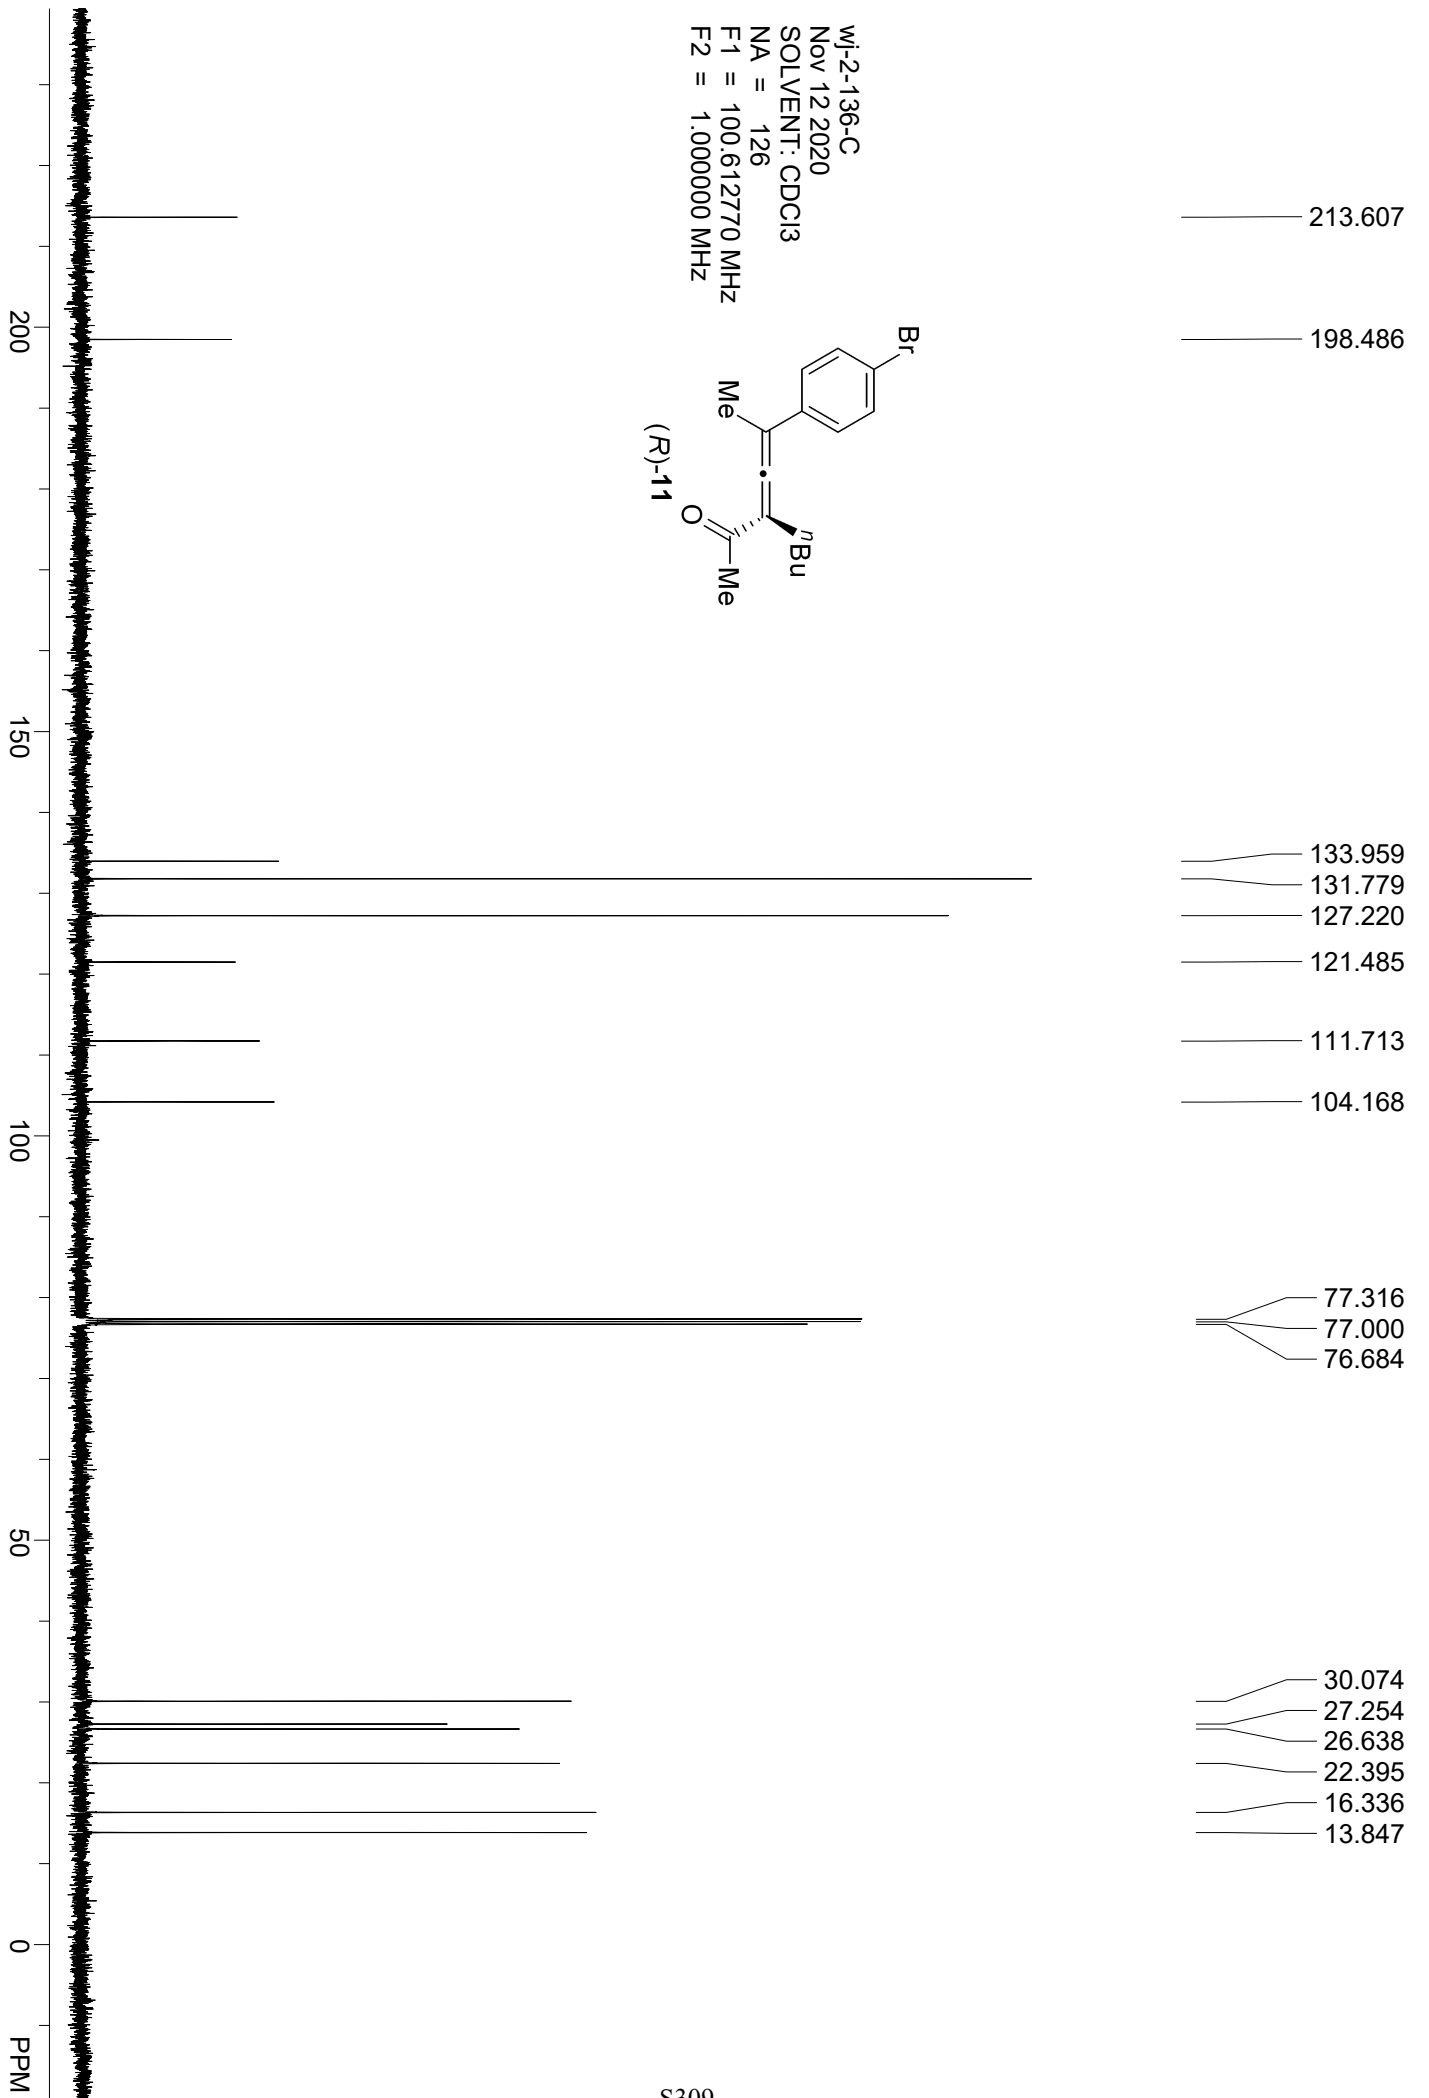

# Area Percent Report



Agilent Technologies

sample wj-2-136-OD-H-99.5-0.5-1.0-214

Data file: C:\Users\Public\Documents\ChemStation\1\Data\WJ\_LC 2020-11-11 21-24-07\006-P2-C2-wj-2-136.D

## Acquisition Data:

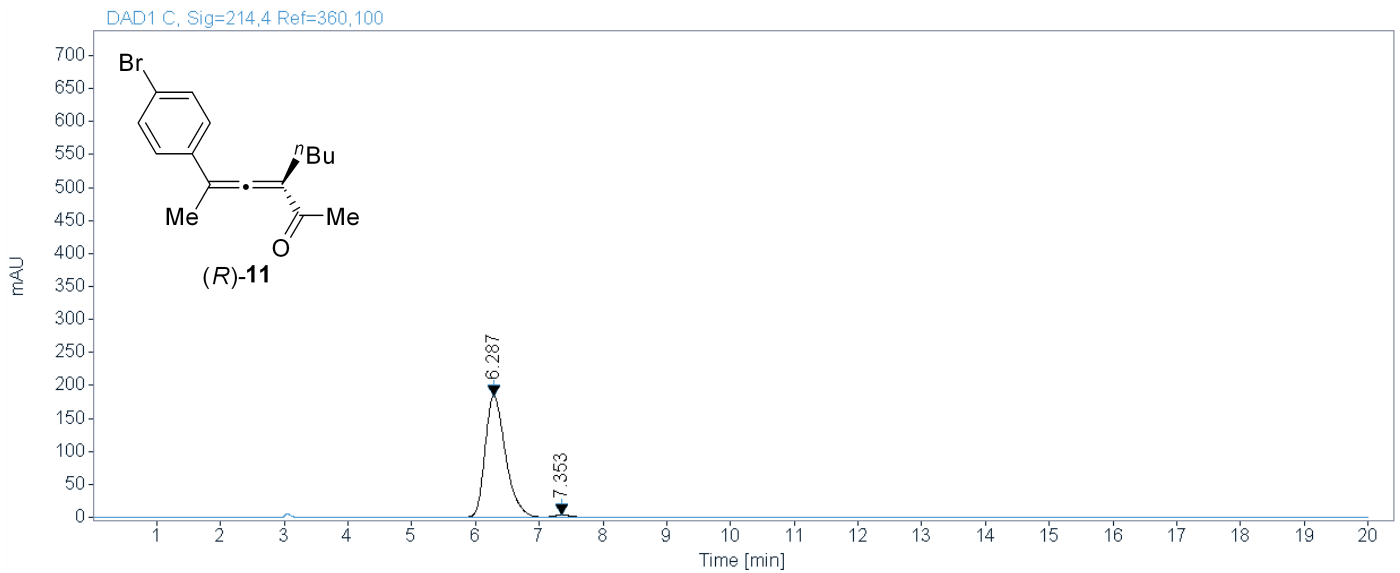

Signal: DAD1 C, Sig=214,4 Ref=360,100

| RT [min] | Width [min] | Height   | Area      | Area%    |
|----------|-------------|----------|-----------|----------|
| 6.287    | 0.3434      | 183.9776 | 4090.1533 | 98.5656  |
| 7.353    | 0.2664      | 3.4316   | 59.5220   | 1.4344   |
|          |             | Sum      | 4149.6753 | 100.0000 |

# Area Percent Report



sample wj-2-136-rac-OD-H-99.5-0.5-1.0-214

Data file: C:\Users\Public\Documents\ChemStation\1\Data\WJ\_LC 2020-11-11 21-24-07\005-P2-C1-wj-2-136-rac.D

## Acquisition Data:

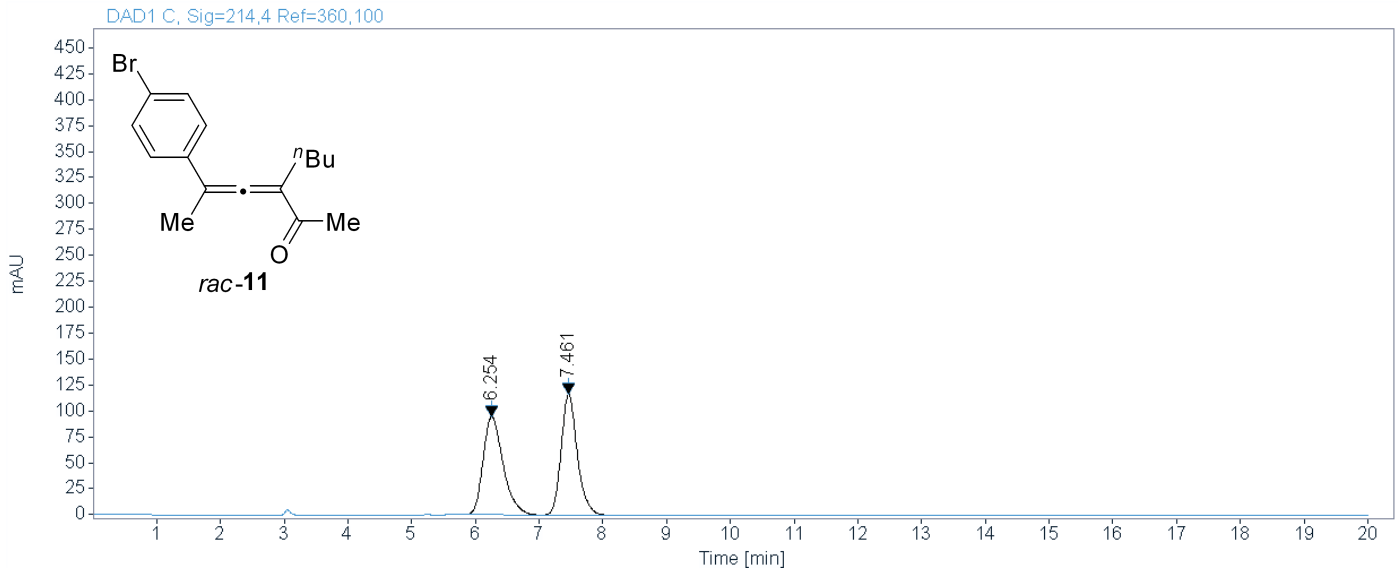

Signal: DAD1 C, Sig=214,4 Ref=360,100

| RT [min] | Width [min] | Height   | Area      | Area%    |
|----------|-------------|----------|-----------|----------|
| 6.254    | 0.3388      | 94.2691  | 2058.8628 | 49.9882  |
| 7.461    | 0.2697      | 116.8115 | 2059.8315 | 50.0118  |
|          | Sum         |          | 4118.6943 | 100.0000 |

wf-2-135-H  
Nov 11 2020  
SOLVENT: CDCl3  
NA = 4  
F1 = 400.130005 MHz  
F2 = 1.000000 MHz

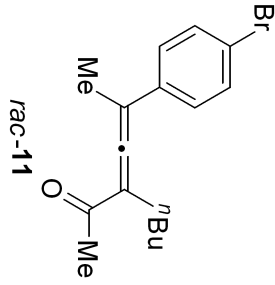

7.502  
7.496  
7.491  
7.479  
7.474  
7.468  
7.265  
7.263  
7.256  
7.252  
7.240  
7.235  
7.228

2.317  
2.301  
2.280  
2.244  
2.209

1.432  
1.427  
1.412  
1.405  
1.394  
1.391  
1.385  
1.375  
1.367  
1.359  
1.342  
1.324  
1.309  
1.304  
0.895  
0.877  
0.860  
-0.000

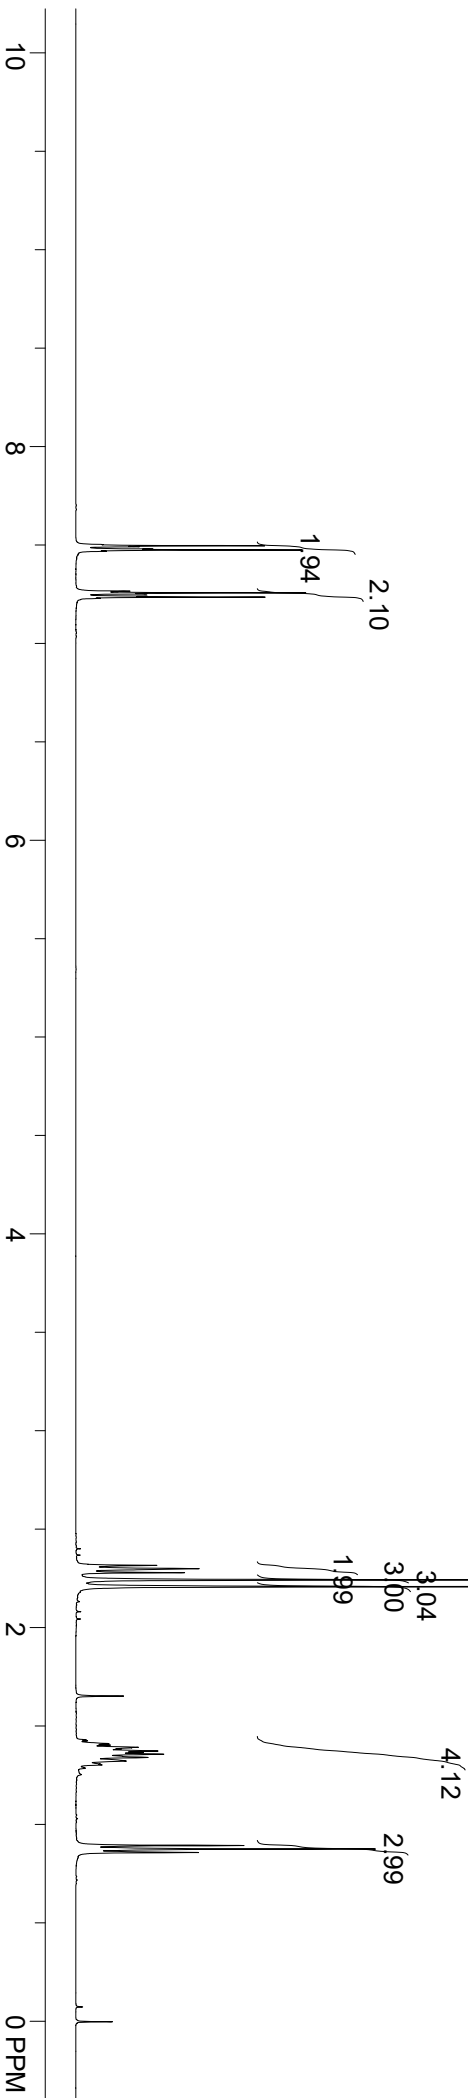



WJ-2-135-C  
Nov 11 2020  
SOLVENT: CDCl3  
NA = 150  
F1 = 100.612770 MHz  
F2 = 1.000000 MHz

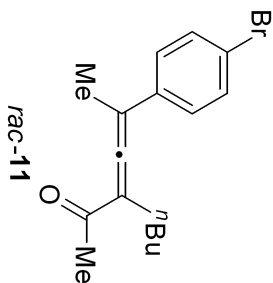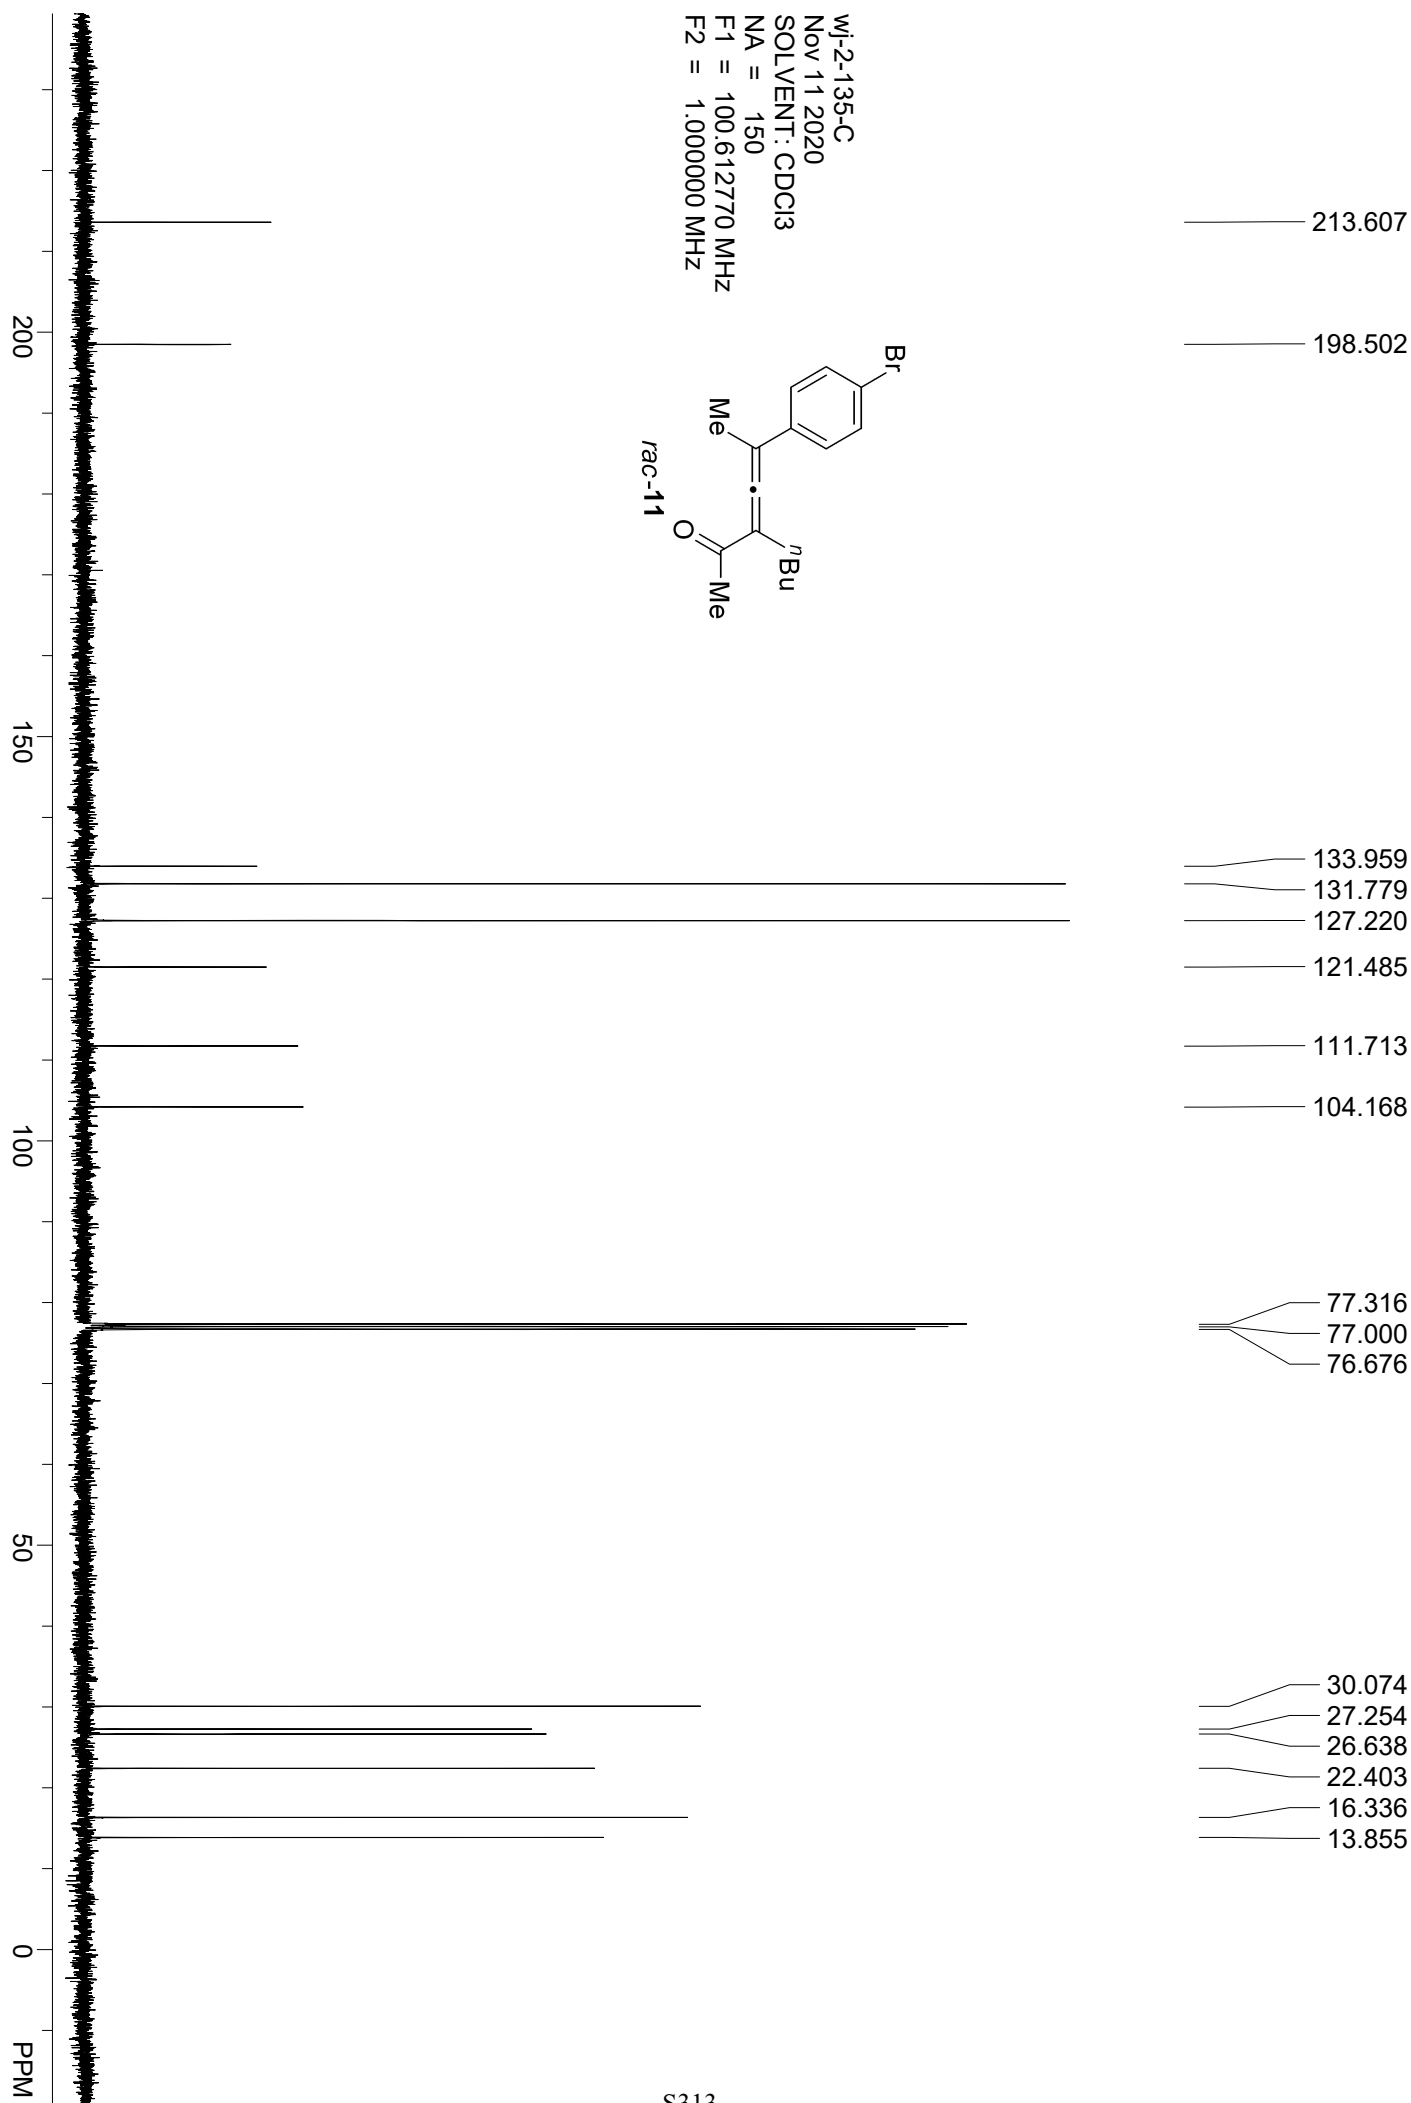

Supplement: d4qo00082j1.pdf [file d4qo00082j1.pdf]
